# Supplementary material for: Fungal communities represent the majority of root-specific transcripts in the transcriptomes of Agave plants grown in semiarid regions
Source: PeerJ journal article supplement (doi:10.7717/peerj.13252), 2022-05-02
Supplement: Data_S3.pdf [file Data_S3.pdf]

## S7 - Supplemental Results for taxonomic analysis pipeline

The comparison based on amino acid similarity (tBLASTx), in function of top N BLAST hits (N from 1 to 4), greatly reduces the number of unclassified sequences compared to BLASTn (Fig. 1A). Regarding the classification between the Ascomycota and Basidiomycota phyla, the metric TPR (Fig. 1B) shows that Ascomycota is better classified than Basidiomycota and both have low FPR (below 0,5% for  $N \geq 2$ ; Fig. 1C). Thus, we consider the E-value  $\leq 1e-10$  and  $N \geq 2$  as the threshold for the next analyses.

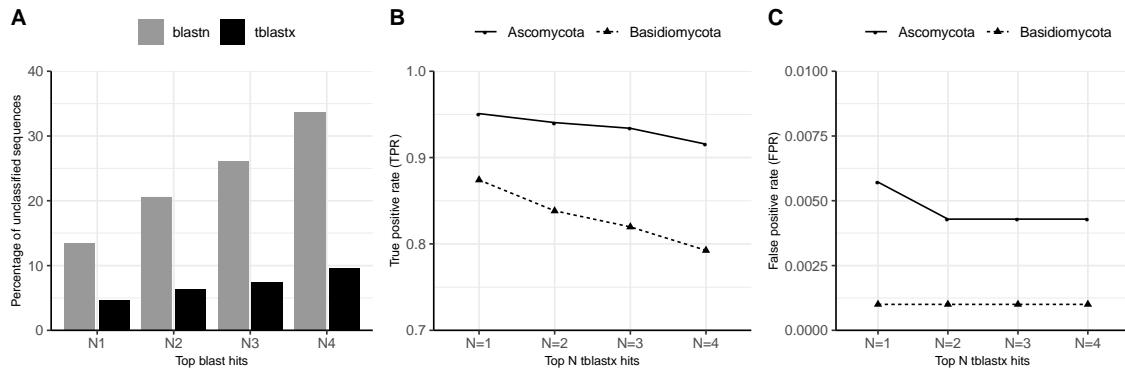

**Figure 1:** Testing of different parameters in the pipeline. A: Comparison between using BLASTn or tBLASTx to decrease the number of unclassified sequences, both using the same E-value threshold. Note that tBLASTx presented a lower percentage of unclassified. B: True positive rate (TPR) comparison between the number of top N tBLASTx hits. C: False positive rate (FPR) comparison between the number of top N tBLASTx hits.

After parameter optimization step, we applied the pipeline to classify the fungi transcripts of *A. sisalana*, hybrid 11648 and *A. fourcroydes* among the Ascomycota, Basidiomycota, Asco or Basidio, and Other Fungi groups (Table 2 on manuscript).
