# Supplementary material for: Fungal communities represent the majority of root-specific transcripts in the transcriptomes of Agave plants grown in semiarid regions
Source: PeerJ journal article supplement (doi:10.7717/peerj.13252), 2022-05-02
Supplement: Fig_S2.pdf [file Fig_S2.pdf]

## Ascomycota

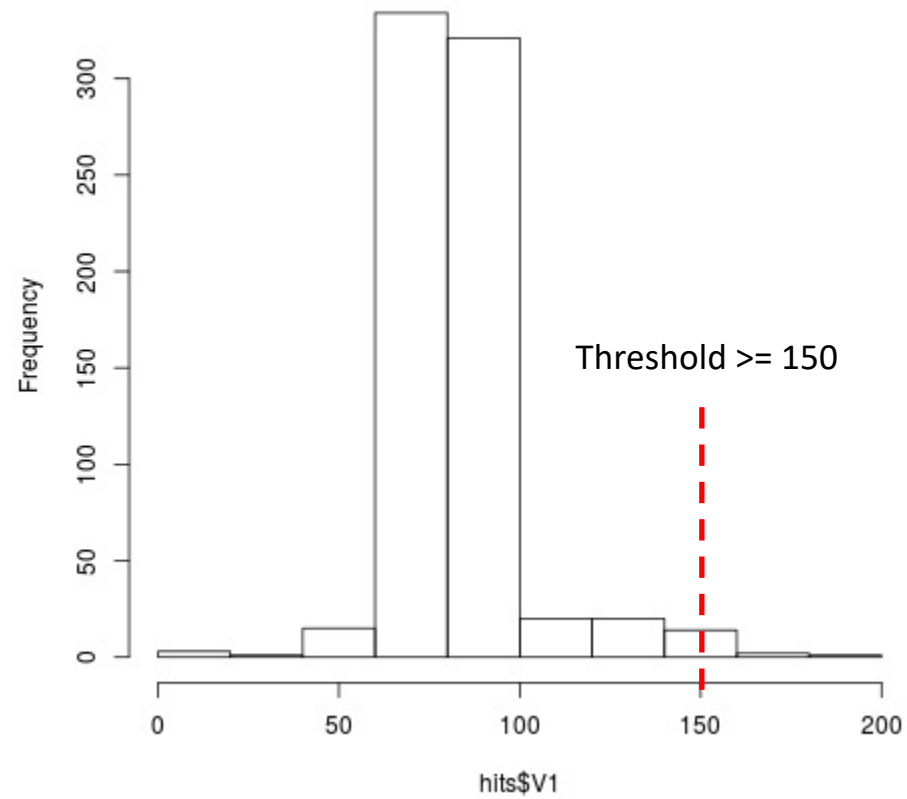

## Basidiomycota

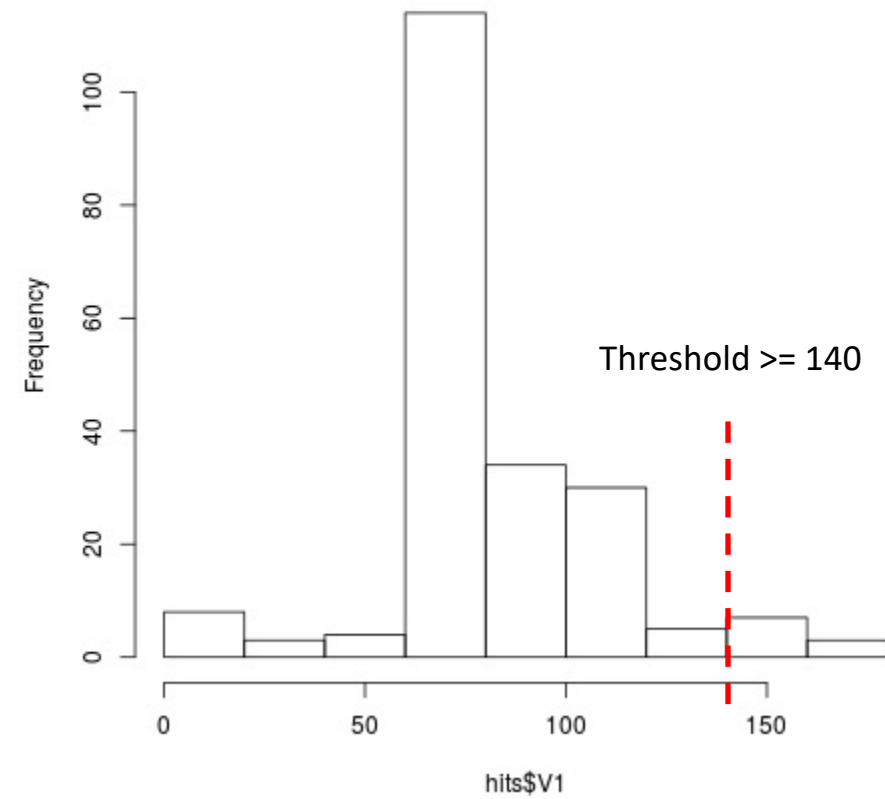

Distribution of HSP family members in the asco (left) and basidio (right) genomes
