# Supplementary material for: Fungal communities represent the majority of root-specific transcripts in the transcriptomes of Agave plants grown in semiarid regions
Source: PeerJ. 2022 May 2;10:e13252. doi: 10.7717/peerj.13252 (PMC9070324; doi:10.7717/peerj.13252)
Supplement: Supplemental Information 3 — Expression values shown are the mean from the 3 biological replicates. “CAZy” sheet contains the result from the dbCAN2 software, “SignalP” the results from SignalP, and “TCDB” the BLAST results against the TCDB. [file peerj-10-13252-s003.xlsx]

## Sheet: Agave fourcroydes
ID	Leaf mean expression (TPM)	Stem mean expression (TPM)	Root mean expression (TPM)	Classification	Pannzer Annotation	Blast Uniref90 annotation	HSP db classification	Leaf SPM	Stem SPM	Root SPM	CAZy	SignalP	TCDB hit description	TCDB Alignment cov (%)
AF_DN44166_c0_g1	0.0239703	0.139157	197.508	No hit found	NA	UniRef90_A0A1Q1M952 Replicase n=1 Tax=Agaricus bisporus virus 16 TaxID=1945746 RepID=A0A1Q1M952_9VIRU	No hit	0.0044757	0.0246176	0.999687	No hit	0
AF_DN51821_c5_g1	0.497545	0.812537	168.953	Ascomycota	NA	UniRef90_D6QT61 Elongation factor 1-alpha (Fragment) n=1 Tax=Rhizoplaca chrysoleuca TaxID=112062 RepID=D6QT61_9LECA	No hit	0.0778749	0.114688	0.990344	No hit	0
AF_DN54548_c1_g1	0.0115894	0.160207	154.303	No hit found	NA	UniRef90_M7S6H0 Uncharacterized protein n=1 Tax=Eutypa lata (strain UCR-EL1) TaxID=1287681 RepID=M7S6H0_EUTLA	No hit	0.00228282	0.0294395	0.999564	No hit	0
AF_DN51128_c6_g2	35.063	123.085	121.531	Ascomycota	NA	UniRef90_A0A167W9E3 ATP-dependent molecular chaperone HSC82 n=1 Tax=Ascosphaera apis ARSEF 7405 TaxID=392613 RepID=A0A167W9E3_9EURO	Hsp90	0.465909	0.62649	0.624852	No hit	0	gnl|TC-DB|P08238|8.A.163.1.1 Heat shock protein HSP 90-beta OS=Homo sapiens OX=9606 GN=HSP90AB1 PE=1 SV=4	71.6981
AF_DN37055_c0_g1	0	0.0486412	105.353	Ascomycota	Heat-shock protein (Eurofung)	UniRef90_B8MTE1 Heat shock protein Hsp30/Hsp42, putative n=1 Tax=Talaromyces stipitatus (strain ATCC 10500 / CBS 375.48 /QM 6759 / NRRL 1006) TaxID=441959 RepID=B8MTE1_TALSN	ACD	0	0.0101768	0.999948	No hit	0
AF_DN37348_c0_g1	25.5044	38.0305	97.4102	Basidiomycota	Heat shock protein 70 (Fragment)	UniRef90_A0A165EBL4 Heat shock protein HSS1 n=1 Tax=Exidia glandulosa HHB12029 TaxID=1314781 RepID=A0A165EBL4_EXIGL	Hsp70	0.487317	0.544867	0.68238	No hit	0	gnl|TC-DB|P10591|3.A.16.1.6 Heat shock protein SSA1 OS=Saccharomyces cerevisiae (strain ATCC 204508 / S288c) OX=559292 GN=SSA1 PE=1 SV=4	93.985
AF_DN447_c0_g1	0.049092	0.108527	87.7195	Basidiomycota	Heat shock protein 9	UniRef90_A0A165EC75 Uncharacterized protein n=1 Tax=Exidia glandulosa HHB12029 TaxID=1314781 RepID=A0A165EC75_EXIGL	No hit	0.0106811	0.0229628	0.999679	No hit	0
AF_DN51128_c6_g1	0	0.359388	86.047	Basidiomycota	NA	UniRef90_A0A0C3MM95 Uncharacterized protein n=1 Tax=Tulasnella calospora MUT 4182 TaxID=1051891 RepID=A0A0C3MM95_9HOMO	Hsp90	0	0.0685806	0.997646	No hit	0	gnl|TC-DB|P08238|8.A.163.1.1 Heat shock protein HSP 90-beta OS=Homo sapiens OX=9606 GN=HSP90AB1 PE=1 SV=4	81.4516
AF_DN46089_c1_g1	0.270067	0.595525	69.1987	Basidiomycota	ADP/ATP carrier protein (Fragment)	UniRef90_A0A165T2E3 Eukaryotic ADP/ATP carrier n=2 Tax=Agaricomycetes TaxID=155619 RepID=A0A165T2E3_9APHY	No hit	0.0558104	0.109068	0.992466	No hit	0	gnl|TC-DB|P18239|2.A.29.1.7 ADP,ATP carrier protein 2 - Saccharomyces cerevisiae (Baker's yeast).	87.0968
AF_DN44462_c0_g1	0	0.00908677	68.6482	Ascomycota	NA	UniRef90_A0A177CL23 HSP20-like chaperone n=1 Tax=Paraphaeosphaeria sporulosa TaxID=1460663 RepID=A0A177CL23_9PLEO	ACD	0	0.00213168	0.999998	No hit	0
AF_DN47931_c1_g2	0	0.133192	68.4386	Ascomycota	Translation elongation factor 1-alpha (Fragment)	UniRef90_C1IZV9 Translation elongation factor 1 alpha (Fragment) n=40 Tax=Pezizomycotina TaxID=147538 RepID=C1IZV9_9PEZI	No hit	0	0.0294743	0.999566	No hit	0
AF_DN37311_c0_g1	0	0.0619332	67.4079	Ascomycota	NA	UniRef90_A0A1Y1YQ53 HSP20-like chaperone n=1 Tax=Clohesyomyces aquaticus TaxID=1231657 RepID=A0A1Y1YQ53_9PLEO	ACD	0	0.0142196	0.999899	No hit	0
AF_DN43531_c0_g1	0.307859	1.29679	65.1807	Basidiomycota	NA	UniRef90_A0A0H5QKC6 Uncharacterized protein (Fragment) n=1 Tax=Spongospora subterranea TaxID=70186 RepID=A0A0H5QKC6_9EUKA	No hit	0.0626721	0.194166	0.978965	No hit	0
AF_DN39498_c0_g1	13.3485	39.4258	63.6339	Asco or Basidio	Heat shock protein 70	UniRef90_A0A0K3CRW7 BY PROTMAP: gi|323338896|gb|EGA80110.1| Ssa1p [Saccharomyces cerevisiae Vin13] n=2 Tax=Basidiomycota TaxID=5204 RepID=A0A0K3CRW7_RHOTO	Hsp70	0.431197	0.598878	0.674844	No hit	0	gnl|TC-DB|P10591|3.A.16.1.6 Heat shock protein SSA1 OS=Saccharomyces cerevisiae (strain ATCC 204508 / S288c) OX=559292 GN=SSA1 PE=1 SV=4	95.9064
AF_DN97106_c0_g1	0	0.0520723	57.1509	Ascomycota	NA	No hits	No hit	0	0.0124926	0.999922	No hit	0
AF_DN10635_c0_g1	0	0	51.5145	Ascomycota	Heat shock protein Hsp20	UniRef90_A0A1Y1Z6K0 Uncharacterized protein (Fragment) n=1 Tax=Clohesyomyces aquaticus TaxID=1231657 RepID=A0A1Y1Z6K0_9PLEO	ACD	0	0	1	No hit	0
AF_DN48499_c0_g1	0	0.0236785	48.7403	No hit found	NA	UniRef90_G3XKS9 Uncharacterized protein pdi230 n=1 Tax=Pholiota nameko TaxID=61267 RepID=G3XKS9_PHONA	No hit	0	0.00599008	0.999982	No hit	SP(Sec/SPI)
AF_DN48607_c0_g1	0	0.0160391	48.6856	No hit found	NA	No hits	No hit	0	0.00407395	0.999992	No hit	SP(Sec/SPI)
AF_DN52052_c2_g1	0.056978	0	48.2586	Ascomycota	NA	UniRef90_Q6QZR2 70 kDa heat shock protein (Fragment) n=1 Tax=Arthroderma otae TaxID=63405 RepID=Q6QZR2_ARTOT	Hsp70	0.0142179	0	0.999899	No hit	0	gnl|TC-DB|P10591|3.A.16.1.6 Heat shock protein SSA1 OS=Saccharomyces cerevisiae (strain ATCC 204508 / S288c) OX=559292 GN=SSA1 PE=1 SV=4	95.1613
AF_DN103552_c0_g1	0.054477	0	48.2402	Ascomycota	Heat shock protein 70 (Fragment)	UniRef90_A0A094BQN2 Uncharacterized protein n=1 Tax=Pseudogymnoascus sp. VKM F-3775 TaxID=1420901 RepID=A0A094BQN2_9PEZI	Hsp70	0.0136115	0	0.999907	No hit	0	gnl|TC-DB|P08107|1.A.33.1.3 Heat shock 70 kDa protein 1 (HSP70.1) (HSP70-1/HSP70-2) - Homo sapiens (Human).	92.623
AF_DN28068_c0_g1	0	0.101517	45.5824	Ascomycota	Chaperone/heat shock protein Hsp12	UniRef90_A0A225B127 Heat shock protein n=1 Tax=Talaromyces atroroseus TaxID=1441469 RepID=A0A225B127_9EURO	No hit	0	0.0251633	0.999683	No hit	0
AF_DN31420_c0_g1	0	0.0321555	45.3992	Basidiomycota	Heat shock cognate 70 kDa protein 2 (Fragment)	UniRef90_A0A0H2RYR8 Heat shock cognate 70 n=1 Tax=Schizopora paradoxa TaxID=27342 RepID=A0A0H2RYR8_9HOMO	Hsp70	0	0.00824758	0.999966	No hit	0
AF_DN45468_c0_g1	0.019908	0.0088648	43.0218	No hit found	NA	UniRef90_A0A067SH66 Uncharacterized protein n=1 Tax=Galerina marginata (strain CBS 339.88) TaxID=685588 RepID=A0A067SH66_GALM3	No hit	0.0052084	0.00233192	0.999984	No hit	SP(Sec/SPI)
AF_DN35282_c0_g1	0.116402	0.132946	39.2155	Ascomycota	Heat shock protein 16	UniRef90_A0A225BA66 Uncharacterized protein n=1 Tax=Talaromyces atroroseus TaxID=1441469 RepID=A0A225BA66_9EURO	ACD	0.0297757	0.0337538	0.998987	No hit	0
AF_DN42546_c0_g1	0.0226953	0.0169849	36.5631	Basidiomycota	Heat shock protein HSS1	UniRef90_A0A165EBL4 Heat shock protein HSS1 n=1 Tax=Exidia glandulosa HHB12029 TaxID=1314781 RepID=A0A165EBL4_EXIGL	Hsp70	0.00618886	0.00464469	0.99997	No hit	0	gnl|TC-DB|P22953|1.A.33.1.1 HEAT SHOCK COGNATE 70 KDA PROTEIN 1 (HSC70.1) - Arabidopsis thaliana (Mouse-ear cress).	71.25
AF_DN28034_c0_g1	0.01229	0.0196664	32.737	Ascomycota	NA	UniRef90_A0A1Y1YQ53 HSP20-like chaperone n=1 Tax=Clohesyomyces aquaticus TaxID=1231657 RepID=A0A1Y1YQ53_9PLEO	ACD	0.0034715	0.00553491	0.999979	No hit	0
AF_DN44188_c2_g2	0	0	28.8199	Ascomycota	NA	UniRef90_Q92260 Heat shock 70 kDa protein (Fragment) n=1 Tax=Penicillium citrinum TaxID=5077 RepID=HSP70_PENCI	Hsp70	0	0	1	No hit	0	gnl|TC-DB|P08107|1.A.33.1.3 Heat shock 70 kDa protein 1 (HSP70.1) (HSP70-1/HSP70-2) - Homo sapiens (Human).	94.152
AF_DN50952_c2_g1	0.0266366	0.046878	27.9481	Ascomycota	ATP-dependent RNA helicase eIF4A (Fragment)	UniRef90_A0A093ZBA8 Uncharacterized protein n=1 Tax=Pseudogymnoascus sp. VKM F-3775 TaxID=1420901 RepID=A0A093ZBA8_9PEZI	No hit	0.00781006	0.0136107	0.999877	No hit	0	gnl|TC-DB|P38919|3.A.18.1.1 Eukaryotic initiation factor 4A-III - Homo sapiens (Human).	80.6452
AF_DN39720_c1_g1	0	0.0283928	26.3145	Ascomycota	Response to stress	UniRef90_A0A1Y1YQS1 Heat shock protein 9/12-domain-containing protein n=1 Tax=Clohesyomyces aquaticus TaxID=1231657 RepID=A0A1Y1YQS1_9PLEO	No hit	0	0.00846467	0.999964	No hit	0
AF_DN51128_c5_g1	0	0.0143829	25.37	Basidiomycota	Heat shock protein 81-3	UniRef90_A0A0L6WIY8 Heat shock 90 like protein n=3 Tax=Agaricales TaxID=5338 RepID=A0A0L6WIY8_9AGAR	Hsp90	0	0.0043641	0.99999	No hit	0	gnl|TC-DB|P08238|8.A.163.1.1 Heat shock protein HSP 90-beta OS=Homo sapiens OX=9606 GN=HSP90AB1 PE=1 SV=4	74.1294
AF_DN42333_c0_g1	0	0	25.2628	Basidiomycota	Conidiation-specific protein 6	UniRef90_A0A067T225 Uncharacterized protein n=1 Tax=Galerina marginata (strain CBS 339.88) TaxID=685588 RepID=A0A067T225_GALM3	No hit	0	0	1	No hit	0
AF_DN50952_c3_g1	0.00651663	0.0161072	24.8831	Ascomycota	Eukaryotic translation initiation factor 4	UniRef90_W9XLK2 ATP-dependent RNA helicase eIF4A n=1 Tax=Capronia epimyces CBS 606.96 TaxID=1182542 RepID=W9XLK2_9EURO	No hit	0.00199638	0.00491107	0.999986	No hit	0	gnl|TC-DB|P38919|3.A.18.1.1 Eukaryotic initiation factor 4A-III - Homo sapiens (Human).	85.1385
AF_DN50755_c0_g1	0.0104582	0.0377388	24.452	Ascomycota	BTB/POZ fold	UniRef90_A0A1Y1YPQ6 Uncharacterized protein n=1 Tax=Clohesyomyces aquaticus TaxID=1231657 RepID=A0A1Y1YPQ6_9PLEO	No hit	0.00321403	0.0114439	0.999929	No hit	0
AF_DN40184_c0_g1	0	0	22.663	Basidiomycota	Heat shock protein HSS1	UniRef90_A0A1Y2BW01 Heat shock protein 70 (Fragment) n=1 Tax=Neocallimastix californiae TaxID=1754190 RepID=A0A1Y2BW01_9FUNG	Hsp70	0	0	1	No hit	0
AF_DN40687_c0_g1	0	0.0080962	22.6394	No hit found	NA	UniRef90_A0A067SH66 Uncharacterized protein n=1 Tax=Galerina marginata (strain CBS 339.88) TaxID=685588 RepID=A0A067SH66_GALM3	No hit	0	0.00254941	0.999997	No hit	0
AF_DN24234_c0_g1	0	0	22.4766	Basidiomycota	Hmp1-mismatch base pair and cruciform DNA recognition	UniRef90_A0A165FYC7 Mismatched base pair and cruciform DNA recognition protein n=1 Tax=Exidia glandulosa HHB12029 TaxID=1314781 RepID=A0A165FYC7_EXIGL	No hit	0	0	1	No hit	0
AF_DN53069_c3_g1	0.060996	0.0249745	21.8797	Ascomycota	NA	UniRef90_Q0URL3 Uncharacterized protein n=16 Tax=Pleosporales TaxID=92860 RepID=Q0URL3_PHANO	No hit	0.0189108	0.00787876	0.99979	No hit	0	gnl|TC-DB|P18239|2.A.29.1.7 ADP,ATP carrier protein 2 - Saccharomyces cerevisiae (Baker's yeast).	82.3899
AF_DN37749_c0_g1	0.0377697	0	21.8738	Basidiomycota	1 concanamycin induced protein c	UniRef90_A0A067QM01 Uncharacterized protein n=1 Tax=Jaapia argillacea MUCL 33604 TaxID=933084 RepID=A0A067QM01_9HOMO	No hit	0.0118439	0	0.99993	No hit	0
AF_DN46245_c0_g1	0	0.38971	21.4153	Basidiomycota	NA	UniRef90_A0A0H2RQY3 Uncharacterized protein n=1 Tax=Schizopora paradoxa TaxID=27342 RepID=A0A0H2RQY3_9HOMO	No hit	0	0.105239	0.994447	No hit	0
AF_DN47958_c0_g1	0	0.117255	21.025	Basidiomycota	NA	UniRef90_A0A0C2YED9 Uncharacterized protein n=1 Tax=Hebeloma cylindrosporum h7 TaxID=686832 RepID=A0A0C2YED9_HEBCY	No hit	0	0.0358334	0.999358	No hit	SP(Sec/SPI)
AF_DN45662_c0_g1	0	0.0100556	20.5414	Ascomycota	Clock-controlled protein 6	UniRef90_R7YUN5 Uncharacterized protein n=1 Tax=Coniosporium apollinis (strain CBS 100218) TaxID=1168221 RepID=R7YUN5_CONA1	No hit	0	0.00325909	0.999995	No hit	SP(Sec/SPI)
AF_DN94113_c0_g1	0.0355997	0.0288995	20.4711	Ascomycota	NA	UniRef90_A0A2H3IFP6 Uncharacterized protein n=1 Tax=Penicillium occitanis TaxID=290292 RepID=A0A2H3IFP6_9EURO	No hit	0.0114053	0.00928902	0.999892	No hit	0
AF_DN24144_c0_g1	0	0.0304335	20.4462	Ascomycota	Mismatched base pair and cruciform DNA recognition	UniRef90_A0A1Q5QCG9 Uncharacterized protein n=1 Tax=Talaromyces atroroseus TaxID=1441469 RepID=A0A1Q5QCG9_9EURO	No hit	0	0.00977905	0.999952	No hit	0
AF_DN101408_c0_g1	0	0.012903	20.3127	Ascomycota	Polyketide cyclase/dehydrase	UniRef90_A0A177CKF7 Uncharacterized protein n=1 Tax=Paraphaeosphaeria sporulosa TaxID=1460663 RepID=A0A177CKF7_9PLEO	No hit	0	0.00419061	0.999991	No hit	SP(Sec/SPI)
AF_DN12842_c0_g1	0	0.0141418	20.0896	Ascomycota	Heat shock protein 42	UniRef90_W2SFK8 Uncharacterized protein n=1 Tax=Cyphellophora europaea CBS 101466 TaxID=1220924 RepID=W2SFK8_9EURO	ACD	0	0.00460598	0.999989	No hit	0
AF_DN35443_c0_g1	0	0.0208808	20.0848	Ascomycota	NA	UniRef90_A0A177CL23 HSP20-like chaperone n=1 Tax=Paraphaeosphaeria sporulosa TaxID=1460663 RepID=A0A177CL23_9PLEO	ACD	0	0.00677873	0.999977	No hit	0
AF_DN19233_c0_g1	0	0.0329346	20.0151	Basidiomycota	NA	UniRef90_A0A0D2Q5R1 Uncharacterized protein n=1 Tax=Hypholoma sublateritium FD-334 SS-4 TaxID=945553 RepID=A0A0D2Q5R1_9AGAR	No hit	0	0.0106402	0.999943	No hit	0
AF_DN95175_c0_g1	0	0.0312246	19.4324	Asco or Basidio	Conidiation-specific protein 6	UniRef90_A0A165EWD9 Uncharacterized protein n=2 Tax=Exidia glandulosa HHB12029 TaxID=1314781 RepID=A0A165EWD9_EXIGL	No hit	0	0.0101903	0.999948	No hit	0
AF_DN53841_c2_g2	0	0	18.9756	Ascomycota	NA	UniRef90_A0A023EKH5 Putative heat shock 70 bb (Fragment) n=1 Tax=Aedes albopictus TaxID=7160 RepID=A0A023EKH5_AEDAL	No hit	0	0	1	No hit	0
AF_DN22419_c0_g1	0	0.0176311	18.8834	Basidiomycota	NA	UniRef90_A0A0D2Q5R1 Uncharacterized protein n=1 Tax=Hypholoma sublateritium FD-334 SS-4 TaxID=945553 RepID=A0A0D2Q5R1_9AGAR	No hit	0	0.00584542	0.999983	No hit	0
AF_DN43491_c0_g1	0	0.00620587	18.6831	Ascomycota	BTB/POZ fold	UniRef90_A0A093XVF7 Kelch-like protein 38 n=4 Tax=Eurotiales TaxID=5042 RepID=A0A093XVF7_TALMA	No hit	0	0.00207623	0.999998	No hit	0
AF_DN47879_c0_g1	2.93548	7.05459	18.4694	Ascomycota	Collagen triple helix repeat (20 copies) domain-containing protein	UniRef90_A0A1Q5Q8S3 Uncharacterized protein n=1 Tax=Talaromyces atroroseus TaxID=1441469 RepID=A0A1Q5Q8S3_9EURO	No hit	0.35323	0.537888	0.765445	No hit	0
AF_DN43896_c0_g1	0	0.02494	17.996	No hit found	NA	UniRef90_A0A165PYL4 Uncharacterized protein n=1 Tax=Exidia glandulosa HHB12029 TaxID=1314781 RepID=A0A165PYL4_EXIGL	No hit	0	0.00836661	0.999965	No hit	0
AF_DN42526_c0_g2	0	0	17.9298	Ascomycota	Translation elongation factor 1-alpha (Fragment)	UniRef90_A0A023VWL2 Translation elongation factor 1 alpha subunit (Fragment) n=2 Tax=leotiomyceta TaxID=716546 RepID=A0A023VWL2_9EURO	No hit	0	0	1	No hit	0
AF_DN4910_c0_g1	0	0.0185783	17.4225	Basidiomycota	Cell number regulator 11	UniRef90_A0A067S6X7 Uncharacterized protein n=1 Tax=Galerina marginata (strain CBS 339.88) TaxID=685588 RepID=A0A067S6X7_GALM3	No hit	0	0.00631783	0.99998	No hit	0
AF_DN73531_c0_g1	0	0.0109043	16.6063	Ascomycota	Membrane-associating domain-domain-containing protein	UniRef90_K2R207 Uncharacterized protein n=1 Tax=Macrophomina phaseolina (strain MS6) TaxID=1126212 RepID=K2R207_MACPH	No hit	0	0.00378111	0.999993	No hit	0
AF_DN53841_c4_g1	0	0.019088	16.5057	Ascomycota	NA	UniRef90_A0A194VTH1 NAD-specific glutamate dehydrogenase n=1 Tax=Valsa mali TaxID=105487 RepID=A0A194VTH1_9PEZI	No hit	0	0.00660524	0.999978	No hit	0
AF_DN35499_c0_g1	0	0.0050312	16.2434	Ascomycota	SWIRM domain	UniRef90_A0A1Y1YP62 SWIRM domain-containing protein FUN19 n=1 Tax=Clohesyomyces aquaticus TaxID=1231657 RepID=A0A1Y1YP62_9PLEO	No hit	0	0.00176249	0.999998	No hit	0
AF_DN42523_c0_g1	0	0	15.9206	Ascomycota	Heat shock protein 30	UniRef90_A0A175W4N5 30 kDa heat shock protein n=1 Tax=Madurella mycetomatis TaxID=100816 RepID=A0A175W4N5_9PEZI	ACD	0	0	1	No hit	0
AF_DN41950_c0_g1	0	0	15.653	Ascomycota	NA	No hits	No hit	0	0	1	No hit	0
AF_DN46189_c0_g1	0.0254924	0.0219188	15.6374	Ascomycota	Elongation factor 3	UniRef90_A0A150V7D4 Uncharacterized protein n=1 Tax=Acidomyces richmondensis BFW TaxID=766039 RepID=A0A150V7D4_9PEZI	No hit	0.00895243	0.00771096	0.99993	No hit	0
AF_DN15860_c0_g1	0	0.0363219	15.5903	No hit found	NA	UniRef90_A0A067T5S7 Uncharacterized protein n=1 Tax=Galerina marginata (strain CBS 339.88) TaxID=685588 RepID=A0A067T5S7_GALM3	No hit	0	0.0127011	0.999919	No hit	SP(Sec/SPI)
AF_DN46500_c0_g1	0	0.00481953	15.529	Basidiomycota	NA	UniRef90_A0A0H2R8I5 Uncharacterized protein n=1 Tax=Schizopora paradoxa TaxID=27342 RepID=A0A0H2R8I5_9HOMO	No hit	0	0.00171399	0.999999	No hit	0
AF_DN6274_c0_g1	0	0.0244252	15.448	Ascomycota	Ribose 5-phosphate isomerase RpiB	UniRef90_A0A225AE36 Putative ribose 5-phosphate isomerase n=1 Tax=Talaromyces atroroseus TaxID=1441469 RepID=A0A225AE36_9EURO	No hit	0	0.00861751	0.999963	No hit	0
AF_DN1778_c0_g1	0	0	15.0783	Ascomycota	NA	UniRef90_A0A2A9P3N8 Uncharacterized protein n=1 Tax=Ophiocordyceps unilateralis TaxID=268505 RepID=A0A2A9P3N8_9HYPO	Hsp70	0	0	1	No hit	0	gnl|TC-DB|P10591|3.A.16.1.6 Heat shock protein SSA1 OS=Saccharomyces cerevisiae (strain ATCC 204508 / S288c) OX=559292 GN=SSA1 PE=1 SV=4	87.7049
AF_DN44086_c0_g1	0	0.0454137	15.0693	Basidiomycota	Transaldolase	UniRef90_A0A0H2S1L2 Transaldolase n=1 Tax=Schizopora paradoxa TaxID=27342 RepID=A0A0H2S1L2_9HOMO	No hit	0	0.0159915	0.999872	No hit	0
AF_DN43684_c0_g2	0	0	14.9037	Ascomycota	Cross-pathway control protein A	UniRef90_A0A177D0A2 Uncharacterized protein n=1 Tax=Paraphaeosphaeria sporulosa TaxID=1460663 RepID=A0A177D0A2_9PLEO	No hit	0	0	1	No hit	0
AF_DN39274_c0_g2	0	0	14.5821	Basidiomycota	NA	UniRef90_A0A1C7MCC4 Histone H2A (Fragment) n=18 Tax=Agaricomycetes TaxID=155619 RepID=A0A1C7MCC4_GRIFR	No hit	0	0	1	No hit	0
AF_DN44010_c0_g1	0	0.00847417	14.3573	Ascomycota	NA	UniRef90_A0A1Y1YQ53 HSP20-like chaperone n=1 Tax=Clohesyomyces aquaticus TaxID=1231657 RepID=A0A1Y1YQ53_9PLEO	ACD	0	0.00308919	0.999995	No hit	0
AF_DN8724_c0_g1	0	0.176544	14.2181	No hit found	NA	UniRef90_A0A0H2RYE2 Uncharacterized protein n=1 Tax=Schizopora paradoxa TaxID=27342 RepID=A0A0H2RYE2_9HOMO	No hit	0	0.0596118	0.998222	No hit	0
AF_DN37373_c0_g1	0	0	14.1098	Basidiomycota	NA	UniRef90_A0A067T630 Uncharacterized protein n=1 Tax=Galerina marginata (strain CBS 339.88) TaxID=685588 RepID=A0A067T630_GALM3	No hit	0	0	1	No hit	0
AF_DN23547_c0_g1	0	0.0549957	13.9316	Ascomycota	High expression lethality protein Hel10	UniRef90_B8LUM0 High expression lethality protein Hel10, putative n=1 Tax=Talaromyces stipitatus (strain ATCC 10500 / CBS 375.48 / QM 6759 / NRRL 1006) TaxID=441959 RepID=B8LUM0_TALSN	No hit	0	0.019799	0.999804	No hit	0
AF_DN37055_c1_g1	0	0	13.8775	Ascomycota	Response to stress	UniRef90_A0A1Y1ZM14 HSP20-like chaperone n=1 Tax=Clohesyomyces aquaticus TaxID=1231657 RepID=A0A1Y1ZM14_9PLEO	ACD	0	0	1	No hit	0
AF_DN9072_c0_g1	0	0	13.7908	Ascomycota	NA	UniRef90_Q6QZR2 70 kDa heat shock protein (Fragment) n=1 Tax=Arthroderma otae TaxID=63405 RepID=Q6QZR2_ARTOT	Hsp70	0	0	1	No hit	0	gnl|TC-DB|P10591|3.A.16.1.6 Heat shock protein SSA1 OS=Saccharomyces cerevisiae (strain ATCC 204508 / S288c) OX=559292 GN=SSA1 PE=1 SV=4	96
AF_DN27846_c0_g1	0	0.057807	13.6451	Ascomycota	1 concanamycin induced protein c	UniRef90_A0A0H2SDF5 Uncharacterized protein n=1 Tax=Schizopora paradoxa TaxID=27342 RepID=A0A0H2SDF5_9HOMO	No hit	0	0.0209327	0.999781	No hit	0
AF_DN40583_c0_g1	0	0.0400833	13.5856	No hit found	NA	No hits	No hit	0	0.0146627	0.999892	No hit	0
AF_DN83601_c0_g1	0	0	13.5845	Ascomycota	NA	UniRef90_A0A0G4KI51 Uncharacterized protein (Fragment) n=1 Tax=Verticillium longisporum TaxID=100787 RepID=A0A0G4KI51_9PEZI	Hsp70	0	0	1	No hit	0	gnl|TC-DB|P10591|3.A.16.1.6 Heat shock protein SSA1 OS=Saccharomyces cerevisiae (strain ATCC 204508 / S288c) OX=559292 GN=SSA1 PE=1 SV=4	96.4286
AF_DN29418_c0_g1	0	0	13.494	Ascomycota	NA	UniRef90_A0A1Y1ZN89 Uncharacterized protein n=1 Tax=Clohesyomyces aquaticus TaxID=1231657 RepID=A0A1Y1ZN89_9PLEO	No hit	0	0	1	No hit	0
AF_DN55230_c0_g1	0	0.0262242	13.352	Ascomycota	Period circadian protein, putative	UniRef90_A0A2J6QGV4 Uncharacterized protein n=1 Tax=Pezoloma ericae TaxID=1745343 RepID=A0A2J6QGV4_9HELO	No hit	0	0.00971702	0.999953	No hit	0
AF_DN31210_c0_g1	0	0	13.3115	Ascomycota	Heat-shock protein (Eurofung)	UniRef90_A0A225B3P5 Uncharacterized protein n=1 Tax=Talaromyces atroroseus TaxID=1441469 RepID=A0A225B3P5_9EURO	ACD	0	0	1	No hit	0
AF_DN47278_c0_g1	0	0.0165674	13.0486	Basidiomycota	Elongation factor EF-3	UniRef90_A0A0H2SEJ1 Uncharacterized protein n=1 Tax=Schizopora paradoxa TaxID=27342 RepID=A0A0H2SEJ1_9HOMO	No hit	0	0.00621805	0.999981	No hit	0
AF_DN43925_c0_g1	0	0	12.9025	Basidiomycota	Glyoxylate pathway regulator	UniRef90_A0A0H2S887 Uncharacterized protein n=1 Tax=Schizopora paradoxa TaxID=27342 RepID=A0A0H2S887_9HOMO	No hit	0	0	1	No hit	0
AF_DN24024_c0_g1	0	0.0243544	12.8726	Ascomycota	NA	UniRef90_A0A178ATR9 Uncharacterized protein n=1 Tax=Stagonospora sp. SRC1lsM3a TaxID=765868 RepID=A0A178ATR9_9PLEO	No hit	0	0.00914919	0.999958	No hit	0
AF_DN37027_c0_g1	0	0	12.8578	Basidiomycota	Ribosomal protein s17	UniRef90_A0A0C9Y8G4 Unplaced genomic scaffold K443scaffold_36, whole genome shotgun sequence n=1 Tax=Laccaria amethystina LaAM-08-1 TaxID=1095629 RepID=A0A0C9Y8G4_9AGAR	No hit	0	0	1	No hit	0
AF_DN35654_c0_g1	0	0	12.7462	No hit found	NA	No hits	No hit	0	0	1	No hit	0
AF_DN46950_c1_g1	0.0217528	0.0188156	12.7327	Ascomycota	Heat shock protein 30	UniRef90_A0A175W4N5 30 kDa heat shock protein n=1 Tax=Madurella mycetomatis TaxID=100816 RepID=A0A175W4N5_9PEZI	ACD	0.00821379	0.00711498	0.999941	No hit	0
AF_DN83710_c0_g1	0	0	12.6743	No hit found	NA	UniRef90_A0A1Q1N6L2 Replicase n=1 Tax=Agaricus bisporus virus 5 TaxID=1945749 RepID=A0A1Q1N6L2_9VIRU	No hit	0	0	1	No hit	0
AF_DN34914_c0_g1	0	0	12.5216	No hit found	NA	UniRef90_A0A165PQX9 Uncharacterized protein n=1 Tax=Daedalea quercina L-15889 TaxID=1314783 RepID=A0A165PQX9_9APHY	No hit	0	0	1	No hit	SP(Sec/SPI)
AF_DN40565_c0_g1	0	0	12.5193	Ascomycota	NA	UniRef90_A0A0G2EXE1 Putative hsp70-like protein n=1 Tax=Diplodia seriata TaxID=420778 RepID=A0A0G2EXE1_9PEZI	Hsp70	0	0	1	No hit	0
AF_DN5341_c0_g1	0	0.0417089	12.4343	Ascomycota	Heat shock protein 42	UniRef90_Q0V0I8 Uncharacterized protein n=1 Tax=Phaeosphaeria nodorum (strain SN15 / ATCC MYA-4574 / FGSC 10173) TaxID=321614 RepID=Q0V0I8_PHANO	ACD	0	0.0157277	0.999876	No hit	0
AF_DN33488_c0_g1	0	0	12.3502	Ascomycota	Clock-controlled protein 6	UniRef90_R7YUN5 Uncharacterized protein n=1 Tax=Coniosporium apollinis (strain CBS 100218) TaxID=1168221 RepID=R7YUN5_CONA1	No hit	0	0	1	No hit	SP(Sec/SPI)
AF_DN46231_c0_g1	0	0.047897	12.3356	Ascomycota	Response to stress	UniRef90_A0A1Y1ZRC1 Putative chaperone/heat shock protein Hsp12 n=1 Tax=Clohesyomyces aquaticus TaxID=1231657 RepID=A0A1Y1ZRC1_9PLEO	No hit	0	0.0180578	0.999837	No hit	0
AF_DN19656_c0_g1	0	0.0104655	12.302	Ascomycota	30 kDa heat shock protein	UniRef90_A0A1Y1YQ53 HSP20-like chaperone n=1 Tax=Clohesyomyces aquaticus TaxID=1231657 RepID=A0A1Y1YQ53_9PLEO	ACD	0	0.00402293	0.999992	No hit	0
AF_DN55410_c0_g1	0	0.0101531	12.246	Ascomycota	NA	UniRef90_A0A1Y1ZH44 Uncharacterized protein n=1 Tax=Clohesyomyces aquaticus TaxID=1231657 RepID=A0A1Y1ZH44_9PLEO	No hit	0	0.00390982	0.999992	No hit	SP(Sec/SPI)
AF_DN38850_c0_g1	0	0	11.8222	Ascomycota	Heat shock protein 42	UniRef90_M2SFU8 Uncharacterized protein n=6 Tax=Bipolaris TaxID=33194 RepID=M2SFU8_COCSN	ACD	0	0	1	No hit	0
AF_DN47213_c0_g1	0	0.0105536	11.78	Basidiomycota	NA	UniRef90_A0A0H2RWI5 Uncharacterized protein n=1 Tax=Schizopora paradoxa TaxID=27342 RepID=A0A0H2RWI5_9HOMO	No hit	0	0.00412036	0.999992	No hit	SP(Sec/SPI)
AF_DN36340_c0_g1	0	0.0429169	11.772	Ascomycota	Cell surface protein, putative	UniRef90_A0A2H3I3F9 Uncharacterized protein n=1 Tax=Penicillium occitanis TaxID=290292 RepID=A0A2H3I3F9_9EURO	No hit	0	0.0164945	0.999864	No hit	0
AF_DN41299_c0_g1	0	0	11.7356	Ascomycota	NA	UniRef90_Q2GYF1 Uncharacterized protein n=1 Tax=Chaetomium globosum (strain ATCC 6205 / CBS 148.51 / DSM 1962 / NBRC 6347/ NRRL 1970) TaxID=306901 RepID=Q2GYF1_CHAGB	No hit	0	0	1	No hit	0
AF_DN22793_c0_g1	0	0.0280553	11.7269	Basidiomycota	Cupredoxin	UniRef90_A0A165I3L9 Cupredoxin n=1 Tax=Exidia glandulosa HHB12029 TaxID=1314781 RepID=A0A165I3L9_EXIGL	No hit	0	0.0108767	0.999941	No hit	SP(Sec/SPI)
AF_DN68613_c0_g1	0	0.0107209	11.6809	Ascomycota	Proline-rich antigen	UniRef90_A0A163BHE1 Uncharacterized protein n=1 Tax=Didymella rabiei TaxID=5454 RepID=A0A163BHE1_DIDRA	No hit	0	0.00419817	0.999991	No hit	SP(Sec/SPI)
AF_DN44550_c0_g1	0	0	11.6016	Ascomycota	NA	UniRef90_B8MIV4 Translation elongation factor eEF-3, putative n=6 Tax=Eurotiales TaxID=5042 RepID=B8MIV4_TALSN	No hit	0	0	1	No hit	0
AF_DN48496_c0_g1	0.0756534	0.0916489	10.9963	Basidiomycota	Endo-beta-glucanase	UniRef90_A0A165F642 Endo-1,3(4)-beta-glucanase n=1 Tax=Exidia glandulosa HHB12029 TaxID=1314781 RepID=A0A165F642_EXIGL	No hit	0.0293212	0.035256	0.998948	No hit	0
AF_DN14051_c0_g1	0	0	10.8725	Basidiomycota	NA	UniRef90_A0A067TDN4 Uncharacterized protein n=1 Tax=Galerina marginata (strain CBS 339.88) TaxID=685588 RepID=A0A067TDN4_GALM3	No hit	0	0	1	No hit	SP(Sec/SPI)
AF_DN33531_c0_g1	0	0	10.8485	Basidiomycota	NA	UniRef90_A0A0H2SDF0 Uncharacterized protein (Fragment) n=1 Tax=Schizopora paradoxa TaxID=27342 RepID=A0A0H2SDF0_9HOMO	No hit	0	0	1	No hit	0
AF_DN49676_c0_g1	0	0.00958693	10.8482	No hit found	NA	UniRef90_A0A1Q1N6L2 Replicase n=1 Tax=Agaricus bisporus virus 5 TaxID=1945749 RepID=A0A1Q1N6L2_9VIRU	No hit	0	0.00385944	0.999993	No hit	0
AF_DN44009_c0_g1	0	0	10.8454	Basidiomycota	Small heat shock protein C4	UniRef90_A0A0H2SQ87 HSP20-like chaperone n=2 Tax=Schizopora paradoxa TaxID=27342 RepID=A0A0H2SQ87_9HOMO	ACD	0	0	1	No hit	0
AF_DN44792_c0_g1	0	0.022668	10.8266	No hit found	NA	UniRef90_A0A0H2SB07 Uncharacterized protein n=1 Tax=Schizopora paradoxa TaxID=27342 RepID=A0A0H2SB07_9HOMO	No hit	0	0.00907319	0.999959	No hit	0
AF_DN45713_c0_g1	0	0.00579023	10.7874	Basidiomycota	Alternative cyclin pcl1	UniRef90_A0A0H2RZN3 Uncharacterized protein n=1 Tax=Schizopora paradoxa TaxID=27342 RepID=A0A0H2RZN3_9HOMO	No hit	0	0.00234027	0.999997	No hit	0
AF_DN45696_c0_g1	0	0.0080289	10.6286	Basidiomycota	Fasciclin-domain-containing protein	UniRef90_A0A165CF66 FAS1 domain-containing protein n=1 Tax=Exidia glandulosa HHB12029 TaxID=1314781 RepID=A0A165CF66_EXIGL	No hit	0	0.00325938	0.999995	No hit	SP(Sec/SPI)
AF_DN92442_c0_g1	0	0	10.6041	Basidiomycota	Hydrophobin	UniRef90_UPI0004409526 hydrophobin-251 n=1 Tax=Fomitiporia mediterranea (strain MF3/22) TaxID=694068 RepID=UPI0004409526	No hit	0	0	1	No hit	0
AF_DN93780_c0_g1	0	0	10.563	Basidiomycota	Heat shock protein HSS1 (Fragment)	UniRef90_G4T8Z4 Related to HSP70 heat shock protein 70 (Hsp70) n=2 Tax=Serendipita TaxID=358905 RepID=G4T8Z4_SERID	Hsp70	0	0	1	No hit	0	gnl|TC-DB|P10591|3.A.16.1.6 Heat shock protein SSA1 OS=Saccharomyces cerevisiae (strain ATCC 204508 / S288c) OX=559292 GN=SSA1 PE=1 SV=4	89.1473
AF_DN49751_c0_g1	0.0300533	0	10.5414	Ascomycota	NA	UniRef90_A0A0D2AP50 Uncharacterized protein n=1 Tax=Verruconis gallopava TaxID=253628 RepID=A0A0D2AP50_9PEZI	No hit	0.0121051	0	0.999927	No hit	0
AF_DN19360_c0_g1	0	0	10.498	Ascomycota	Cell surface protein	UniRef90_M2REX1 Uncharacterized protein n=1 Tax=Cochliobolus sativus (strain ND90Pr / ATCC 201652) TaxID=665912 RepID=M2REX1_COCSN	No hit	0	0	1	No hit	0
AF_DN70646_c0_g1	0	0.0597527	10.2315	Basidiomycota	Heat shock protein 83	UniRef90_A0A165F3H7 Heat-shock protein 90 n=1 Tax=Exidia glandulosa HHB12029 TaxID=1314781 RepID=A0A165F3H7_EXIGL	Hsp90	0	0.0239874	0.999712	No hit	0	gnl|TC-DB|P08238|8.A.163.1.1 Heat shock protein HSP 90-beta OS=Homo sapiens OX=9606 GN=HSP90AB1 PE=1 SV=4	71.8447
AF_DN29168_c0_g1	0	0	10.1792	Basidiomycota	NA	UniRef90_A0A1C7MFL1 ATP-dependent molecular chaperone HSP82 n=1 Tax=Grifola frondosa TaxID=5627 RepID=A0A1C7MFL1_GRIFR	Hsp90	0	0	1	No hit	0	gnl|TC-DB|P08238|8.A.163.1.1 Heat shock protein HSP 90-beta OS=Homo sapiens OX=9606 GN=HSP90AB1 PE=1 SV=4	75.6757
AF_DN44781_c0_g1	0	0.258751	10.1595	No hit found	NA	UniRef90_A0A0H2RXZ6 Uncharacterized protein n=1 Tax=Schizopora paradoxa TaxID=27342 RepID=A0A0H2RXZ6_9HOMO	No hit	0	0.0949637	0.995481	No hit	0
AF_DN42427_c0_g1	0	0.02226	9.92956	Basidiomycota	NA	UniRef90_A0A0D2MV64 Uncharacterized protein n=1 Tax=Hypholoma sublateritium FD-334 SS-4 TaxID=945553 RepID=A0A0D2MV64_9AGAR	No hit	0	0.00920559	0.999958	No hit	0
AF_DN42456_c0_g2	0	0.0275062	9.87875	Basidiomycota	NA	No hits	No hit	0	0.0113679	0.999935	No hit	0
AF_DN30398_c0_g1	0	0	9.87233	Ascomycota	Cell surface protein, putative	UniRef90_A0A177CID2 Uncharacterized protein n=1 Tax=Paraphaeosphaeria sporulosa TaxID=1460663 RepID=A0A177CID2_9PLEO	No hit	0	0	1	No hit	0
AF_DN37075_c0_g1	0	0.122163	9.8268	Basidiomycota	NA	UniRef90_UPI000440E80C ATP:ADP antiporter n=1 Tax=Stereum hirsutum (strain FP-91666) TaxID=721885 RepID=UPI000440E80C	No hit	0	0.0483299	0.998831	No hit	0	gnl|TC-DB|P04710|2.A.29.1.3 ADP,ATP carrier protein 1 - Saccharomyces cerevisiae (Baker's yeast).	79.8658
AF_DN26831_c0_g1	0	0	9.80425	No hit found	NA	No hits	No hit	0	0	1	No hit	SP(Sec/SPI)
AF_DN32257_c0_g1	0.0123325	0.00350153	9.67443	Ascomycota	Plasma membrane fusion protein PRM1	UniRef90_A0A0G2HKP1 Putative pheromone-regulated multispanning membrane protein n=1 Tax=Phaeomoniella chlamydospora TaxID=158046 RepID=A0A0G2HKP1_9EURO	No hit	0.00517639	0.00147618	0.999986	No hit	0	gnl|TC-DB|Q5B1G6|9.B.63.1.3 Plasma membrane fusion protein prm1 OS=Emericella nidulans (strain FGSC A4 / ATCC 38163 / CBS 112.46 / NRRL 194 / M139) GN=prm1 PE=3 SV=1	72.8643
AF_DN55097_c0_g1	0	0	9.65143	Ascomycota	Conidiation-specific protein con-10	UniRef90_A0A084RW90 Uncharacterized protein n=2 Tax=Stachybotrys chartarum TaxID=74722 RepID=A0A084RW90_STACH	No hit	0	0	1	No hit	0
AF_DN85895_c0_g1	0	0	9.57621	Basidiomycota	Translation initiation factor SU	UniRef90_UPI0004417A5B eukaryotic translation initiation factor 1 n=1 Tax=Punctularia strigosozonata (strain HHB-11173) TaxID=741275 RepID=UPI0004417A5B	No hit	0	0	1	No hit	0
AF_DN29185_c0_g1	0	0.0151851	9.53258	Ascomycota	NA	UniRef90_A0A2H3ITN4 Uncharacterized protein n=1 Tax=Penicillium occitanis TaxID=290292 RepID=A0A2H3ITN4_9EURO	No hit	0	0.00640084	0.99998	No hit	0
AF_DN37792_c0_g1	0	0.0145602	9.53038	Basidiomycota	Sporulation-specific chitinase	UniRef90_A0A165QS55 Uncharacterized protein n=1 Tax=Exidia glandulosa HHB12029 TaxID=1314781 RepID=A0A165QS55_EXIGL	No hit	0	0.00613989	0.999981	GH18(43-377)	SP(Sec/SPI)
AF_DN36921_c0_g1	0	0	9.52672	Basidiomycota	NA	No hits	No hit	0	0	1	No hit	0
AF_DN40592_c0_g1	0	0	9.46703	Basidiomycota	Small heat shock protein C4	UniRef90_G4TL92 Uncharacterized protein n=1 Tax=Serendipita indica (strain DSM 11827) TaxID=1109443 RepID=G4TL92_SERID	ACD	0	0	1	No hit	0
AF_DN50952_c1_g1	0	0	9.35525	Ascomycota	NA	UniRef90_A0A1B8CWN3 Uncharacterized protein n=1 Tax=Pseudogymnoascus sp. 24MN13 TaxID=1622150 RepID=A0A1B8CWN3_9PEZI	No hit	0	0	1	No hit	0	gnl|TC-DB|P38919|3.A.18.1.1 Eukaryotic initiation factor 4A-III - Homo sapiens (Human).	89.011
AF_DN39716_c0_g1	0	0.0162145	9.31478	Basidiomycota	Glutamine synthetase	UniRef90_A0A0H2RA61 Glutamine synthetase n=1 Tax=Schizopora paradoxa TaxID=27342 RepID=A0A0H2RA61_9HOMO	No hit	0	0.00689246	0.999976	No hit	0
AF_DN28773_c1_g1	0	0	9.27239	Ascomycota	Heat shock 70 kDa protein (Fragment)	UniRef90_A0A1J9PVV4 Hsp72-like protein n=1 Tax=Emergomyces pasteuriana Ep9510 TaxID=1447872 RepID=A0A1J9PVV4_9EURO	Hsp70	0	0	1	No hit	0	gnl|TC-DB|P22953|1.A.33.1.1 HEAT SHOCK COGNATE 70 KDA PROTEIN 1 (HSC70.1) - Arabidopsis thaliana (Mouse-ear cress).	75
AF_DN44955_c0_g1	0	0.0132738	9.26609	Ascomycota	Gpi-anchored cell wall beta--endoglucanase	UniRef90_A0A225ALG7 Uncharacterized protein n=1 Tax=Talaromyces atroroseus TaxID=1441469 RepID=A0A225ALG7_9EURO	No hit	0	0.00566216	0.999984	GH17(19)	0
AF_DN32889_c0_g1	0	0	9.24303	Ascomycota	Response to stress	UniRef90_A0A1Y1YQS1 Heat shock protein 9/12-domain-containing protein n=1 Tax=Clohesyomyces aquaticus TaxID=1231657 RepID=A0A1Y1YQS1_9PLEO	No hit	0	0	1	No hit	0
AF_DN42545_c0_g1	0	0.0115551	9.09879	Basidiomycota	Elongation factor 3	UniRef90_A0A0H2SEJ1 Uncharacterized protein n=1 Tax=Schizopora paradoxa TaxID=27342 RepID=A0A0H2SEJ1_9HOMO	No hit	0	0.00496829	0.999988	No hit	0
AF_DN45979_c0_g1	0	0.0101454	8.89946	Basidiomycota	Hypothetiocal protein	UniRef90_A0A165DJY7 Uncharacterized protein n=1 Tax=Exidia glandulosa HHB12029 TaxID=1314781 RepID=A0A165DJY7_EXIGL	No hit	0	0.00440319	0.99999	No hit	0
AF_DN25402_c0_g1	0	0	8.87646	Ascomycota	Procyclic acidic repetitive protein PARP	UniRef90_B8MGK5 Uncharacterized protein n=1 Tax=Talaromyces stipitatus (strain ATCC 10500 / CBS 375.48 / QM 6759 / NRRL 1006)TaxID=441959 RepID=B8MGK5_TALSN	No hit	0	0	1	No hit	0
AF_DN50204_c0_g1	0	0.00664377	8.76544	Basidiomycota	Transcription factor	UniRef90_A0A0H2SDL2 Uncharacterized protein n=1 Tax=Schizopora paradoxa TaxID=27342 RepID=A0A0H2SDL2_9HOMO	No hit	0	0.00290575	0.999996	No hit	0
AF_DN54159_c4_g3	0	0	8.6667	Ascomycota	Heat shock protein 70 (Fragment)	UniRef90_A5HVI6 Heat shock protein 70 (Fragment) n=1 Tax=Paracoccidioides brasiliensis TaxID=121759 RepID=A5HVI6_PARBR	Hsp70	0	0	1	No hit	0	gnl|TC-DB|P10591|3.A.16.1.6 Heat shock protein SSA1 OS=Saccharomyces cerevisiae (strain ATCC 204508 / S288c) OX=559292 GN=SSA1 PE=1 SV=4	96.8153
AF_DN45590_c0_g1	0.007163	0.0115091	8.6515	Ascomycota	Basic-leucine zipper (BZIP) transcription factor	UniRef90_A0A1Y2M131 Uncharacterized protein n=1 Tax=Epicoccum nigrum TaxID=105696 RepID=A0A1Y2M131_EPING	No hit	0.00314821	0.00504746	0.999982	No hit	0
AF_DN44448_c0_g1	0	0.0149208	8.62472	Basidiomycota	Aspartic proteinase	UniRef90_A0A165BD10 Family A1 protease n=1 Tax=Exidia glandulosa HHB12029 TaxID=1314781 RepID=A0A165BD10_EXIGL	No hit	0	0.00654067	0.999979	No hit	SP(Sec/SPI)
AF_DN30503_c0_g1	0	0	8.59667	Ascomycota	Conidiation-specific protein 6	UniRef90_A0A225AR25 Uncharacterized protein n=1 Tax=Talaromyces atroroseus TaxID=1441469 RepID=A0A225AR25_9EURO	No hit	0	0	1	No hit	0
AF_DN44329_c0_g1	0	0	8.59641	Ascomycota	NA	UniRef90_A0A1Y1ZUD1 Uncharacterized protein n=1 Tax=Clohesyomyces aquaticus TaxID=1231657 RepID=A0A1Y1ZUD1_9PLEO	No hit	0	0	1	No hit	0
AF_DN26433_c0_g1	0	0.0341577	8.47814	Basidiomycota	NA	UniRef90_A0A0H2SNQ4 Uncharacterized protein n=1 Tax=Schizopora paradoxa TaxID=27342 RepID=A0A0H2SNQ4_9HOMO	No hit	0	0.0149327	0.999889	No hit	SP(Sec/SPI)
AF_DN41455_c0_g1	0	0	8.46677	Ascomycota	GPI-anchored CFEM domain protein B	UniRef90_A0A0L1HRC1 Proline-rich antigen n=1 Tax=Stemphylium lycopersici TaxID=183478 RepID=A0A0L1HRC1_9PLEO	No hit	0	0	1	No hit	SP(Sec/SPI)
AF_DN44650_c0_g1	0	0.0146813	8.45885	No hit found	NA	UniRef90_A0A067TKR0 Uncharacterized protein n=1 Tax=Galerina marginata (strain CBS 339.88) TaxID=685588 RepID=A0A067TKR0_GALM3	No hit	0	0.00648624	0.999979	No hit	SP(Sec/SPI)
AF_DN44873_c0_g1	0	0.0119273	8.43858	Basidiomycota	Malate synthase, glyoxysomal	UniRef90_A0A0H2S9D0 Malate synthase n=1 Tax=Schizopora paradoxa TaxID=27342 RepID=A0A0H2S9D0_9HOMO	No hit	0	0.00528176	0.999986	No hit	0
AF_DN40837_c0_g1	0	0.0213963	8.38478	Basidiomycota	NA	UniRef90_A0A165M716 Uncharacterized protein n=1 Tax=Exidia glandulosa HHB12029 TaxID=1314781 RepID=A0A165M716_EXIGL	No hit	0	0.00945459	0.999955	No hit	0
AF_DN37109_c0_g1	0	0.0124385	8.38282	Ascomycota	ATP-dependent chaperone ClpB	UniRef90_A0A225B120 Heat shock protein hsp98 n=1 Tax=Talaromyces atroroseus TaxID=1441469 RepID=A0A225B120_9EURO	Hsp100	0	0.00552133	0.999985	GH6	0
AF_DN36971_c0_g1	0	0.0085072	8.33662	Basidiomycota	NA	UniRef90_A0A165Q6P0 Uncharacterized protein n=1 Tax=Exidia glandulosa HHB12029 TaxID=1314781 RepID=A0A165Q6P0_EXIGL	No hit	0	0.00379202	0.999993	No hit	0
AF_DN33087_c0_g1	0.126735	0.0803571	8.31508	Ascomycota	Pathogenesis associated protein Cap20	UniRef90_A0A1Q5QC18 Uncharacterized protein n=1 Tax=Talaromyces atroroseus TaxID=1441469 RepID=A0A1Q5QC18_9EURO	No hit	0.0533613	0.0345645	0.997977	No hit	0
AF_DN30730_c0_g1	0	0	8.26792	Ascomycota	NA	UniRef90_G2QTG7 Uncharacterized protein n=1 Tax=Thielavia terrestris (strain ATCC 38088 / NRRL 8126) TaxID=578455 RepID=G2QTG7_THITE	No hit	0	0	1	No hit	0
AF_DN74822_c0_g1	0	0	8.26684	Ascomycota	NA	UniRef90_A0A1Y1ZN89 Uncharacterized protein n=1 Tax=Clohesyomyces aquaticus TaxID=1231657 RepID=A0A1Y1ZN89_9PLEO	No hit	0	0	1	No hit	0
AF_DN42601_c0_g1	0	0.0124251	8.22049	Basidiomycota	Putative RNA recognition domain-containing protein	UniRef90_A0A165P242 Uncharacterized protein n=1 Tax=Exidia glandulosa HHB12029 TaxID=1314781 RepID=A0A165P242_EXIGL	No hit	0	0.00555876	0.999985	No hit	0
AF_DN35597_c0_g1	0	0.0234962	8.13487	No hit found	NA	No hits	No hit	0	0.0104982	0.999945	No hit	0
AF_DN45026_c1_g1	0	0.0094853	8.13206	Basidiomycota	Glyceraldehyde-3-phosphate dehydrogenase	UniRef90_A0A0H2SNU1 Glyceraldehyde-3-phosphate dehydrogenase n=1 Tax=Schizopora paradoxa TaxID=27342 RepID=A0A0H2SNU1_9HOMO	No hit	0	0.00426826	0.999991	No hit	0
AF_DN85084_c0_g1	0	0.0163531	8.12714	Basidiomycota	NA	UniRef90_A0A067T630 Uncharacterized protein n=1 Tax=Galerina marginata (strain CBS 339.88) TaxID=685588 RepID=A0A067T630_GALM3	No hit	0	0.0073354	0.999973	No hit	0
AF_DN37367_c0_g1	0.010846	0.00818543	8.12518	Basidiomycota	Glycoside hydrolase	UniRef90_A0A165EBW2 Glycoside hydrolase (Fragment) n=1 Tax=Exidia glandulosa HHB12029 TaxID=1314781 RepID=A0A165EBW2_EXIGL	No hit	0.00487889	0.00368694	0.999981	GH18(142-330)	SP(Sec/SPI)
AF_DN84215_c0_g1	0	0	8.09848	Ascomycota	Heat shock protein 42	UniRef90_Q0V0I8 Uncharacterized protein n=1 Tax=Phaeosphaeria nodorum (strain SN15 / ATCC MYA-4574 / FGSC 10173) TaxID=321614 RepID=Q0V0I8_PHANO	ACD	0	0	1	No hit	0
AF_DN38493_c0_g1	0	0	8.09182	Basidiomycota	MFS monosaccharide transporter	UniRef90_A0A067TQ88 Uncharacterized protein n=1 Tax=Galerina marginata (strain CBS 339.88) TaxID=685588 RepID=A0A067TQ88_GALM3	No hit	0	0	1	No hit	0
AF_DN65754_c0_g1	0	0	8.07983	Ascomycota	Response to stress	UniRef90_A0A1Y1ZM14 HSP20-like chaperone n=1 Tax=Clohesyomyces aquaticus TaxID=1231657 RepID=A0A1Y1ZM14_9PLEO	ACD	0	0	1	No hit	0
AF_DN10886_c0_g1	0	0	8.07002	Ascomycota	Heat shock protein 30 kDa	UniRef90_A0A074W0V8 30 kDa heat shock protein n=1 Tax=Aureobasidium melanogenum CBS 110374 TaxID=1043003 RepID=A0A074W0V8_9PEZI	ACD	0	0	1	No hit	0
AF_DN31579_c0_g1	0	0	7.98129	Basidiomycota	Mismatched base pair and cruciform DNA recognition protein	UniRef90_A8NBV5 Uncharacterized protein n=1 Tax=Coprinopsis cinerea (strain Okayama-7 / 130 / ATCC MYA-4618 / FGSC 9003)TaxID=240176 RepID=A8NBV5_COPC7	No hit	0	0	1	No hit	0
AF_DN91236_c0_g1	0	0	7.95846	Ascomycota	Response to stress	UniRef90_K2RT72 Heat shock protein 9/12 n=1 Tax=Macrophomina phaseolina (strain MS6) TaxID=1126212 RepID=K2RT72_MACPH	No hit	0	0	1	No hit	0
AF_DN5518_c0_g1	0	0.00670787	7.90767	Basidiomycota	NA	UniRef90_A0A165IHX8 Uncharacterized protein n=1 Tax=Exidia glandulosa HHB12029 TaxID=1314781 RepID=A0A165IHX8_EXIGL	No hit	0	0.00305702	0.999995	GH128(215-434)	SP(Sec/SPI)
AF_DN44631_c1_g1	0	0.0291768	7.85287	Ascomycota	NA	UniRef90_A0A0D1ZRX6 Uncharacterized protein n=1 Tax=Cladophialophora immunda TaxID=569365 RepID=A0A0D1ZRX6_9EURO	ACD	0	0.0131867	0.999913	No hit	0
AF_DN23624_c0_g1	0	0	7.78555	Ascomycota	6-phosphogluconate dehydrogenase, decarboxylating	UniRef90_A0A0D1YBL9 Uncharacterized protein n=1 Tax=Exophiala sideris TaxID=1016849 RepID=A0A0D1YBL9_9EURO	ACD	0	0	1	No hit	0
AF_DN30409_c0_g1	0	0	7.74899	Ascomycota	NA	UniRef90_A0A2I2FM84 Uncharacterized protein n=1 Tax=Aspergillus candidus TaxID=41067 RepID=A0A2I2FM84_9EURO	No hit	0	0	1	No hit	0
AF_DN34906_c0_g1	0	0.00545327	7.7474	Basidiomycota	Extracellular serine-rich	UniRef90_A0A0H2RP75 Uncharacterized protein n=1 Tax=Schizopora paradoxa TaxID=27342 RepID=A0A0H2RP75_9HOMO	No hit	0	0.00250763	0.999997	No hit	0
AF_DN50604_c0_g1	0.0048528	0	7.67764	Basidiomycota	NA	UniRef90_A0A165PK58 Uncharacterized protein n=1 Tax=Exidia glandulosa HHB12029 TaxID=1314781 RepID=A0A165PK58_EXIGL	No hit	0.00224045	0	0.999997	No hit	0
AF_DN19063_c0_g1	0	0.0655927	7.66357	No hit found	NA	No hits	No hit	0	0.0294117	0.999567	No hit	0
AF_DN43083_c0_g1	0	0.0122824	7.6041	Ascomycota	Acyl-CoA desaturase	UniRef90_A0A0N1P1G0 Acyl-CoA desaturase n=1 Tax=Phialophora attae TaxID=1664694 RepID=A0A0N1P1G0_9EURO	No hit	0	0.00567193	0.999984	No hit	0
AF_DN28023_c0_g1	0	0	7.52388	Basidiomycota	Mismatched base pair and cruciform DNA recognition protein	UniRef90_A0A067TC41 Uncharacterized protein n=1 Tax=Galerina marginata (strain CBS 339.88) TaxID=685588 RepID=A0A067TC41_GALM3	No hit	0	0	1	No hit	0
AF_DN43113_c0_g1	0	0	7.51784	Basidiomycota	NA	UniRef90_A0A0H2SCT5 Uncharacterized protein n=1 Tax=Schizopora paradoxa TaxID=27342 RepID=A0A0H2SCT5_9HOMO	No hit	0	0	1	No hit	0
AF_DN48570_c0_g1	0	0	7.49709	No hit found	NA	UniRef90_A0A0H2SNT9 Uncharacterized protein n=1 Tax=Schizopora paradoxa TaxID=27342 RepID=A0A0H2SNT9_9HOMO	No hit	0	0	1	No hit	0
AF_DN44272_c0_g1	0	0	7.39228	Basidiomycota	Isocitrate lyase	UniRef90_A0A0H2SCX4 Isocitrate lyase n=1 Tax=Schizopora paradoxa TaxID=27342 RepID=A0A0H2SCX4_9HOMO	No hit	0	0	1	No hit	0
AF_DN20363_c0_g1	0.0136549	0	7.37849	Ascomycota	GPI-anchored CFEM domain protein B	UniRef90_A0A1V6UEM0 Uncharacterized protein n=1 Tax=Penicillium coprophilum TaxID=36646 RepID=A0A1V6UEM0_9EURO	No hit	0.00638021	0	0.99998	No hit	0
AF_DN19053_c0_g1	0	0	7.37071	Ascomycota	NA	UniRef90_Q0UD46 Uncharacterized protein n=1 Tax=Phaeosphaeria nodorum (strain SN15 / ATCC MYA-4574 / FGSC 10173) TaxID=321614 RepID=Q0UD46_PHANO	No hit	0	0	1	No hit	0
AF_DN9115_c0_g1	0	0.171632	7.36733	No hit found	NA	UniRef90_A0A0H2S402 Uncharacterized protein n=1 Tax=Schizopora paradoxa TaxID=27342 RepID=A0A0H2S402_9HOMO	No hit	0	0.0743569	0.997232	No hit	SP(Sec/SPI)
AF_DN38935_c0_g1	0	0.0127878	7.25915	Basidiomycota	NA	UniRef90_A0A0H2S800 Uncharacterized protein n=1 Tax=Schizopora paradoxa TaxID=27342 RepID=A0A0H2S800_9HOMO	No hit	0	0.00601825	0.999982	No hit	0
AF_DN4098_c0_g1	0	0.122692	7.25858	Basidiomycota	NA	UniRef90_A0A0H2S8K2 Uncharacterized protein n=1 Tax=Schizopora paradoxa TaxID=27342 RepID=A0A0H2S8K2_9HOMO	No hit	0	0.0547335	0.998501	No hit	0
AF_DN35553_c0_g1	0	0.165662	7.24969	Ascomycota	NA	UniRef90_A0A2H3I3F9 Uncharacterized protein n=1 Tax=Penicillium occitanis TaxID=290292 RepID=A0A2H3I3F9_9EURO	No hit	0	0.0724519	0.997372	No hit	0
AF_DN36766_c0_g1	0	0.0080289	7.24854	Basidiomycota	Chaperone protein DnaJ	UniRef90_A0A0D0DX03 Unplaced genomic scaffold scaffold_23, whole genome shotgun sequence n=1 Tax=Paxillus rubicundulus Ve08.2h10 TaxID=930991 RepID=A0A0D0DX03_9HOMO	DnaJ	0	0.00378988	0.999993	No hit	0
AF_DN25519_c0_g1	0	0	7.24816	Ascomycota	NA	UniRef90_A0A177CL23 HSP20-like chaperone n=1 Tax=Paraphaeosphaeria sporulosa TaxID=1460663 RepID=A0A177CL23_9PLEO	ACD	0	0	1	No hit	0
AF_DN44565_c0_g1	0	0.0137611	7.24158	Basidiomycota	NA	UniRef90_A0A0C2WNS9 Uncharacterized protein n=1 Tax=Serendipita vermifera MAFF 305830 TaxID=933852 RepID=A0A0C2WNS9_9HOMO	No hit	0	0.00647974	0.999979	No hit	0
AF_DN41392_c0_g1	0	0.0140592	7.23303	Basidiomycota	Small heat shock protein C4	UniRef90_A0A0H2SCS3 HSP20-like chaperone n=1 Tax=Schizopora paradoxa TaxID=27342 RepID=A0A0H2SCS3_9HOMO	ACD	0	0.00662236	0.999978	No hit	0
AF_DN33764_c0_g1	0	0	7.20051	Ascomycota	Response to stress	UniRef90_A0A1Y1YQS1 Heat shock protein 9/12-domain-containing protein n=1 Tax=Clohesyomyces aquaticus TaxID=1231657 RepID=A0A1Y1YQS1_9PLEO	No hit	0	0	1	No hit	0
AF_DN47490_c0_g1	0	0.0059342	7.19698	Basidiomycota	Alternative cyclin Pcl12, variant	UniRef90_J0LAA8 Uncharacterized protein n=1 Tax=Auricularia subglabra (strain TFB-10046 / SS5) TaxID=717982 RepID=J0LAA8_AURST	No hit	0	0.0028124	0.999996	No hit	0
AF_DN21146_c0_g1	0	0	7.18195	Basidiomycota	Heat shock protein (Fragment)	UniRef90_A0A0C3QID3 Uncharacterized protein n=1 Tax=Tulasnella calospora MUT 4182 TaxID=1051891 RepID=A0A0C3QID3_9HOMO	Hsp70	0	0	1	No hit	0
AF_DN35139_c0_g1	0	0.0141066	7.17715	Basidiomycota	Alkali-sensitive linkage protein 1	UniRef90_A0A0H2S7I2 Uncharacterized protein n=1 Tax=Schizopora paradoxa TaxID=27342 RepID=A0A0H2S7I2_9HOMO	No hit	0	0.00666609	0.999978	GH128(143-360)	SP(Sec/SPI)
AF_DN35572_c0_g1	0	0.0345535	7.13527	Basidiomycota	NA	UniRef90_A0A0H2RYN7 Acyltransferase ChoActase/COT/CPT n=1 Tax=Schizopora paradoxa TaxID=27342 RepID=A0A0H2RYN7_9HOMO	No hit	0	0.0162033	0.999869	No hit	0
AF_DN3888_c0_g1	0	0	7.1338	Basidiomycota	Mismatched base pair and cruciform DNA recognition protein	UniRef90_A0A067TC41 Uncharacterized protein n=1 Tax=Galerina marginata (strain CBS 339.88) TaxID=685588 RepID=A0A067TC41_GALM3	No hit	0	0	1	No hit	0
AF_DN29209_c0_g1	0	0	7.05958	Basidiomycota	Heat shock protein 83	UniRef90_A0A165F3H7 Heat-shock protein 90 n=1 Tax=Exidia glandulosa HHB12029 TaxID=1314781 RepID=A0A165F3H7_EXIGL	Hsp90	0	0	1	No hit	0
AF_DN43369_c0_g1	0	0	7.04019	Basidiomycota	NA	UniRef90_A0A165BBB0 Uncharacterized protein n=1 Tax=Exidia glandulosa HHB12029 TaxID=1314781 RepID=A0A165BBB0_EXIGL	No hit	0	0	1	No hit	0
AF_DN28181_c0_g1	0	0.0205249	6.95663	Ascomycota	NA	UniRef90_A0A1Y1YQ53 HSP20-like chaperone n=1 Tax=Clohesyomyces aquaticus TaxID=1231657 RepID=A0A1Y1YQ53_9PLEO	ACD	0	0.0097956	0.999952	No hit	0
AF_DN43947_c0_g1	0	0	6.93122	Basidiomycota	Golgi GDP-mannose transporter	UniRef90_A0A165DZ21 UDP-galactose transporter n=1 Tax=Exidia glandulosa HHB12029 TaxID=1314781 RepID=A0A165DZ21_EXIGL	No hit	0	0	1	No hit	0
AF_DN43332_c0_g1	0	0.00547503	6.92367	Asco or Basidio	NA	UniRef90_A0A165IN10 Uncharacterized protein n=1 Tax=Exidia glandulosa HHB12029 TaxID=1314781 RepID=A0A165IN10_EXIGL	No hit	0	0.00263791	0.999997	GH79(39-447)	SP(Sec/SPI)
AF_DN66085_c0_g1	0	0.040179	6.90348	Ascomycota	NA	UniRef90_A0A1Y1NPB0 Uncharacterized protein (Fragment) n=1 Tax=Photinus pyralis TaxID=7054 RepID=A0A1Y1NPB0_PHOPY	No hit	0	0.0190517	0.999818	No hit	0
AF_DN58592_c0_g1	0	0	6.89148	Basidiomycota	ATP:ADP antiporter	UniRef90_A0A151WE38 ADP,ATP carrier protein n=21 Tax=Agaricomycetes TaxID=155619 RepID=A0A151WE38_HYPMA	No hit	0	0	1	No hit	0	gnl|TC-DB|P31167|2.A.29.1.5 ADP,ATP carrier protein 1, mitochondrial - Arabidopsis thaliana (Mouse-ear cress).	85.8407
AF_DN19804_c0_g1	0	0	6.8606	No hit found	NA	UniRef90_A0A1Q1N6L2 Replicase n=1 Tax=Agaricus bisporus virus 5 TaxID=1945749 RepID=A0A1Q1N6L2_9VIRU	No hit	0	0	1	No hit	0
AF_DN32329_c0_g1	0	0	6.84526	Ascomycota	Heat shock protein 30	UniRef90_G9NA99 Uncharacterized protein n=2 Tax=Hypocrea virens TaxID=29875 RepID=G9NA99_HYPVG	ACD	0	0	1	No hit	0
AF_DN8922_c0_g1	0	0	6.77981	Basidiomycota	NA	UniRef90_A0A0C9VUB0 Unplaced genomic scaffold SPHSTscaffold_59, whole genome shotgun sequence n=2 Tax=Sphaerobolus stellatus SS14 TaxID=990650 RepID=A0A0C9VUB0_9HOMO	No hit	0	0	1	No hit	SP(Sec/SPI)
AF_DN42767_c0_g1	0	0	6.77704	Basidiomycota	NA	UniRef90_A0A067T3J8 Uncharacterized protein n=1 Tax=Galerina marginata (strain CBS 339.88) TaxID=685588 RepID=A0A067T3J8_GALM3	No hit	0	0	1	No hit	0
AF_DN61534_c0_g1	0	0	6.77124	Ascomycota	NA	UniRef90_A0A1Y1ZUD1 Uncharacterized protein n=1 Tax=Clohesyomyces aquaticus TaxID=1231657 RepID=A0A1Y1ZUD1_9PLEO	No hit	0	0	1	No hit	0
AF_DN67843_c0_g1	0	0	6.73841	Basidiomycota	NA	UniRef90_A0A0C2SN15 Uncharacterized protein n=1 Tax=Amanita muscaria Koide BX008 TaxID=946122 RepID=A0A0C2SN15_AMAMU	No hit	0	0	1	No hit	0
AF_DN24347_c0_g1	0	0	6.7371	Basidiomycota	NA	UniRef90_A0A067SRT1 Uncharacterized protein n=1 Tax=Galerina marginata (strain CBS 339.88) TaxID=685588 RepID=A0A067SRT1_GALM3	No hit	0	0	1	No hit	SP(Sec/SPI)
AF_DN51128_c2_g1	2.42106	5.04367	6.71291	Ascomycota	NA	UniRef90_C9SXA7 Heat shock protein n=1 Tax=Verticillium alfalfae (strain VaMs.102 / ATCC MYA-4576 / FGSC 10136) TaxID=526221 RepID=C9SXA7_VERA1	Hsp90	0.411757	0.602264	0.68391	No hit	0
AF_DN37355_c0_g1	0	0.0281458	6.70722	Basidiomycota	NA	UniRef90_A0A0H2SEJ1 Uncharacterized protein n=1 Tax=Schizopora paradoxa TaxID=27342 RepID=A0A0H2SEJ1_9HOMO	No hit	0	0.0135907	0.999908	No hit	0
AF_DN94182_c0_g1	0	0	6.7061	Ascomycota	Cell surface protein, putative	UniRef90_A0A225AKB9 Uncharacterized protein n=1 Tax=Talaromyces atroroseus TaxID=1441469 RepID=A0A225AKB9_9EURO	No hit	0	0	1	No hit	0
AF_DN101658_c0_g1	0	0	6.69732	Ascomycota	LEA domain-containing protein	UniRef90_B8M6I2 LEA domain protein n=1 Tax=Talaromyces stipitatus (strain ATCC 10500 / CBS 375.48 / QM 6759 / NRRL 1006)TaxID=441959 RepID=B8M6I2_TALSN	No hit	0	0	1	No hit	0
AF_DN25122_c0_g1	0.00480437	0.027186	6.69491	Ascomycota	Meiotically up-regulated gene 80 protein	UniRef90_W2RZG4 Uncharacterized protein n=1 Tax=Cyphellophora europaea CBS 101466 TaxID=1220924 RepID=W2RZG4_9EURO	No hit	0.00234859	0.0131438	0.999911	No hit	0
AF_DN30482_c0_g1	0	0	6.66734	Other fungi	NA	No hits	No hit	0	0	1	No hit	0
AF_DN50250_c0_g1	0	0	6.6254	Ascomycota	ATP-dependent RNA helicase ded1	UniRef90_W9XPS3 Uncharacterized protein n=2 Tax=Capronia TaxID=43220 RepID=W9XPS3_9EURO	No hit	0	0	1	No hit	0
AF_DN38436_c0_g1	0	0	6.61651	Basidiomycota	NA	UniRef90_G4TIF9 Uncharacterized protein n=1 Tax=Serendipita indica (strain DSM 11827) TaxID=1109443 RepID=G4TIF9_SERID	No hit	0	0	1	No hit	0
AF_DN29508_c0_g1	0	0	6.61039	Ascomycota	Cytochrome b5-like Heme/Steroid binding domain-containing protein (Fragment)	UniRef90_A0A0N1P1G0 Acyl-CoA desaturase n=1 Tax=Phialophora attae TaxID=1664694 RepID=A0A0N1P1G0_9EURO	No hit	0	0	1	No hit	0
AF_DN83515_c0_g1	0	0.0177219	6.60556	Ascomycota	Stress-induced bacterial acidophilic repeat motif	UniRef90_UPI0001F26725 conidiation-specific protein 10 n=1 Tax=Aspergillus niger (strain CBS 513.88 / FGSC A1513) TaxID=425011 RepID=UPI0001F26725	No hit	0	0.00865801	0.999963	No hit	0
AF_DN66816_c0_g1	0	0	6.56988	Basidiomycota	Elongation factor 3 (Fragment)	UniRef90_A0A0W0FFE0 Uncharacterized protein n=1 Tax=Moniliophthora roreri TaxID=221103 RepID=A0A0W0FFE0_9AGAR	No hit	0	0	1	No hit	0
AF_DN66852_c0_g1	0	0.05486	6.56774	Ascomycota	Ribosomal protein L15 (Fragment)	UniRef90_A0A179GQF2 Ribosomal protein L15 n=2 Tax=Purpureocillium lilacinum TaxID=33203 RepID=A0A179GQF2_9HYPO	No hit	0	0.0263796	0.999652	No hit	0
AF_DN37011_c0_g1	0.070772	0.025198	6.50801	Ascomycota	Response to stress	UniRef90_R7Z3X5 Uncharacterized protein n=1 Tax=Coniosporium apollinis (strain CBS 100218) TaxID=1168221 RepID=R7Z3X5_CONA1	No hit	0.033897	0.0123363	0.999349	No hit	0
AF_DN76358_c0_g1	0	0	6.50773	Ascomycota	NA	UniRef90_A0A2H6K8Q1 Short-chain dehydrogenase, putative n=1 Tax=Babesia ovata TaxID=189622 RepID=A0A2H6K8Q1_9APIC	No hit	0	0	1	No hit	0
AF_DN58294_c0_g1	0	0.0316592	6.50767	Ascomycota	NA	UniRef90_A0A0S2KQB4 ORF1 n=1 Tax=Penicillium spinulosum metavirus 1 TaxID=1755795 RepID=A0A0S2KQB4_9VIRU	No hit	0	0.0154592	0.99988	No hit	0
AF_DN38936_c0_g1	0	0.0324692	6.49108	Basidiomycota	Elongation factor EF-3	UniRef90_K4IPC8 Translation elongation factor 3 (Fragment) n=1 Tax=Amanita strobiliformis TaxID=67730 RepID=K4IPC8_9AGAR	No hit	0	0.0158658	0.999874	No hit	0
AF_DN11940_c0_g1	0	0.171794	6.48581	No hit found	NA	No hits	No hit	0	0.0785124	0.996913	No hit	0
AF_DN44529_c0_g1	0	0	6.47821	Basidiomycota	PI-PLC X domain-containing protein	UniRef90_A0A067SXQ9 Uncharacterized protein n=1 Tax=Galerina marginata (strain CBS 339.88) TaxID=685588 RepID=A0A067SXQ9_GALM3	No hit	0	0	1	No hit	0
AF_DN20258_c0_g1	0	0.044852	6.47594	Basidiomycota	NA	UniRef90_A0A0H2SLJ7 General substrate transporter n=1 Tax=Schizopora paradoxa TaxID=27342 RepID=A0A0H2SLJ7_9HOMO	No hit	0	0.021805	0.999762	No hit	0
AF_DN57925_c0_g1	0	0.00512307	6.45452	Ascomycota	NA	UniRef90_A0A0G2GXS0 Putative hsp20 alpha crystallin family protein n=1 Tax=Phaeomoniella chlamydospora TaxID=158046 RepID=A0A0G2GXS0_9EURO	ACD	0	0.00254377	0.999997	No hit	0
AF_DN106844_c0_g1	0	0.0580357	6.43153	Basidiomycota	Iron-sulfur cluster assembly protein (Fragment)	UniRef90_A0A0H2REC5 Iron-sulfur cluster assembly protein n=1 Tax=Schizopora paradoxa TaxID=27342 RepID=A0A0H2REC5_9HOMO	No hit	0	0.0281153	0.999605	No hit	0
AF_DN39949_c0_g1	0	0	6.42056	Basidiomycota	ADP/ATP carrier protein, variant	UniRef90_A0A165T2E3 Eukaryotic ADP/ATP carrier n=2 Tax=Agaricomycetes TaxID=155619 RepID=A0A165T2E3_9APHY	No hit	0	0	1	No hit	0	gnl|TC-DB|P18238|2.A.29.1.9 ADP,ATP carrier protein 3 OS=Saccharomyces cerevisiae (strain ATCC 204508 / S288c) GN=AAC3 PE=1 SV=1	84.0909
AF_DN73799_c0_g1	0	0	6.4048	Ascomycota	Histone chaperone domain CHZ family protein	UniRef90_A0A225AUR8 Uncharacterized protein n=1 Tax=Talaromyces atroroseus TaxID=1441469 RepID=A0A225AUR8_9EURO	No hit	0	0	1	No hit	0
AF_DN12722_c0_g1	0	0	6.39417	Basidiomycota	Ph domain-containing protein	UniRef90_A0A165EGZ9 Uncharacterized protein n=1 Tax=Exidia glandulosa HHB12029 TaxID=1314781 RepID=A0A165EGZ9_EXIGL	No hit	0	0	1	No hit	0
AF_DN75726_c0_g1	0	0	6.38971	Ascomycota	NA	UniRef90_A0A177CL23 HSP20-like chaperone n=1 Tax=Paraphaeosphaeria sporulosa TaxID=1460663 RepID=A0A177CL23_9PLEO	ACD	0	0	1	No hit	0
AF_DN38090_c0_g1	0	0.00743987	6.37367	No hit found	NA	UniRef90_A0A088CPQ5 Coat protein n=2 Tax=unclassified Virgaviridae TaxID=1527522 RepID=A0A088CPQ5_9VIRU	No hit	0	0.00371	0.999993	No hit	0
AF_DN16909_c0_g1	0	0	6.3529	Basidiomycota	NA	UniRef90_A0A0H2RLH6 Uncharacterized protein n=1 Tax=Schizopora paradoxa TaxID=27342 RepID=A0A0H2RLH6_9HOMO	No hit	0	0	1	No hit	0
AF_DN38194_c0_g1	0	0.0226003	6.34568	Ascomycota	NA	UniRef90_A0A1Y1YQY0 Uncharacterized protein n=1 Tax=Clohesyomyces aquaticus TaxID=1231657 RepID=A0A1Y1YQY0_9PLEO	No hit	0	0.0112066	0.999937	No hit	0
AF_DN6187_c0_g1	0	0	6.33713	Basidiomycota	NA	UniRef90_A0A0C2Y9R5 Uncharacterized protein n=1 Tax=Hebeloma cylindrosporum h7 TaxID=686832 RepID=A0A0C2Y9R5_HEBCY	No hit	0	0	1	No hit	0
AF_DN40311_c0_g1	0	0	6.33078	Basidiomycota	Heat shock protein 70 (Fragment)	UniRef90_A0A0H2S7S2 Heat shock protein 70 n=1 Tax=Schizopora paradoxa TaxID=27342 RepID=A0A0H2S7S2_9HOMO	Hsp70	0	0	1	No hit	0	gnl|TC-DB|P0A6Y8|1.A.33.1.2 Chaperone protein dnaK - Escherichia coli.	78.5016
AF_DN4913_c0_g1	0	0.0074945	6.32635	Basidiomycota	Glutamine synthetase	UniRef90_A0A165QXV8 Glutamine synthetase n=1 Tax=Exidia glandulosa HHB12029 TaxID=1314781 RepID=A0A165QXV8_EXIGL	No hit	0	0.00374923	0.999993	No hit	0
AF_DN31009_c0_g1	0	0.0418623	6.31661	Basidiomycota	Formate dehydrogenase	UniRef90_A0A0H2S5S2 Formate dehydrogenase n=1 Tax=Schizopora paradoxa TaxID=27342 RepID=A0A0H2S5S2_9HOMO	No hit	0	0.0206021	0.999788	No hit	0
AF_DN12441_c0_g1	0	0	6.2949	No hit found	NA	UniRef90_A0A0H2S9F1 Uncharacterized protein n=1 Tax=Schizopora paradoxa TaxID=27342 RepID=A0A0H2S9F1_9HOMO	No hit	0	0	1	No hit	SP(Sec/SPI)
AF_DN67018_c0_g1	0	0	6.28551	Asco or Basidio	NA	No hits	No hit	0	0	1	No hit	0
AF_DN17619_c0_g1	0	0	6.26103	No hit found	NA	No hits	No hit	0	0	1	No hit	SP(Sec/SPI)
AF_DN42025_c0_g1	0.0153206	0.0757243	6.25991	Basidiomycota	Cupredoxin	UniRef90_A0A1Y2ELY9 Cupredoxin n=1 Tax=Leucosporidium creatinivorum TaxID=106004 RepID=A0A1Y2ELY9_9Basidiomycota	No hit	0.00766443	0.0367957	0.999293	No hit	SP(Sec/SPI)
AF_DN55736_c0_g1	0	0	6.24599	Basidiomycota	NA	UniRef90_A0A0C2Y9R5 Uncharacterized protein n=1 Tax=Hebeloma cylindrosporum h7 TaxID=686832 RepID=A0A0C2Y9R5_HEBCY	No hit	0	0	1	No hit	SP(Sec/SPI)
AF_DN74292_c0_g1	0	0.0164579	6.24247	Ascomycota	NA	UniRef90_A0A0G2GVP0 Uncharacterized protein n=1 Tax=Phaeomoniella chlamydospora TaxID=158046 RepID=A0A0G2GVP0_9EURO	No hit	0	0.00824427	0.999966	No hit	0
AF_DN41465_c0_g1	0	0	6.23796	Ascomycota	NA	UniRef90_A0A2H3J0Z6 HSP20-like chaperone n=1 Tax=Penicillium occitanis TaxID=290292 RepID=A0A2H3J0Z6_9EURO	ACD	0	0	1	No hit	0
AF_DN42166_c0_g1	0	0	6.22808	Basidiomycota	NA	No hits	No hit	0	0	1	No hit	0
AF_DN35224_c0_g1	0	0	6.21318	Ascomycota	Acyl-CoA desaturase	UniRef90_B8M3X2 Acyl-CoA desaturase n=5 Tax=Eurotiales TaxID=5042 RepID=B8M3X2_TALSN	No hit	0	0	1	No hit	0
AF_DN74931_c0_g1	0	0	6.18392	Ascomycota	Catalase A	UniRef90_B8M4R0 Catalase n=4 Tax=Eurotiales TaxID=5042 RepID=B8M4R0_TALSN	No hit	0	0	1	No hit	0
AF_DN42143_c1_g1	0	0	6.18209	Basidiomycota	Elongation factor 3	UniRef90_A0A0H2SEJ1 Uncharacterized protein n=1 Tax=Schizopora paradoxa TaxID=27342 RepID=A0A0H2SEJ1_9HOMO	No hit	0	0	1	No hit	0
AF_DN29347_c0_g1	0	0	6.14396	Ascomycota	Transaldolase (Fragment)	UniRef90_B8MD42 Transaldolase n=7 Tax=Eurotiales TaxID=5042 RepID=B8MD42_TALSN	No hit	0	0	1	No hit	0
AF_DN84198_c0_g1	0	0	6.13657	Ascomycota	DnaJ domain-containing protein Psi	UniRef90_A0A225AU38 Uncharacterized protein n=1 Tax=Talaromyces atroroseus TaxID=1441469 RepID=A0A225AU38_9EURO	DnaJ	0	0	1	No hit	0
AF_DN93044_c0_g1	0.0164785	0	6.1225	Ascomycota	Proline-rich antigen	UniRef90_A0A0L1HRC1 Proline-rich antigen n=1 Tax=Stemphylium lycopersici TaxID=183478 RepID=A0A0L1HRC1_9PLEO	No hit	0.00832477	0	0.999965	No hit	0
AF_DN28989_c0_g1	0	0.0117715	6.10702	Ascomycota	Iron sulfur cluster assembly protein mitochondrial	UniRef90_A0A093W1R6 Iron-sulfur cluster assembly protein n=3 Tax=Talaromyces marneffei PM1 TaxID=1077442 RepID=A0A093W1R6_TALMA	No hit	0	0.00596737	0.999982	No hit	0
AF_DN36984_c0_g1	0	0.0580357	6.09889	Ascomycota	Transaldolase	UniRef90_B8MD42 Transaldolase n=7 Tax=Eurotiales TaxID=5042 RepID=B8MD42_TALSN	No hit	0	0.0287717	0.999586	No hit	SP(Sec/SPI)
AF_DN23030_c0_g1	0	0	6.06829	Ascomycota	NA	UniRef90_A0A1Y2A074 High affinity glucose transporter RGT2 n=1 Tax=Clohesyomyces aquaticus TaxID=1231657 RepID=A0A1Y2A074_9PLEO	No hit	0	0	1	No hit	0
AF_DN45311_c1_g1	0	0.0140545	6.0604	Basidiomycota	NA	UniRef90_A0A067U3I9 Uncharacterized protein n=1 Tax=Galerina marginata (strain CBS 339.88) TaxID=685588 RepID=A0A067U3I9_GALM3	No hit	0	0.00714059	0.999975	No hit	0
AF_DN38153_c0_g1	0	0	6.04301	Ascomycota	SWIRM domain	UniRef90_A0A225ARV4 Uncharacterized protein n=1 Tax=Talaromyces atroroseus TaxID=1441469 RepID=A0A225ARV4_9EURO	No hit	0	0	1	No hit	0
AF_DN44069_c0_g1	0	0	6.03787	Basidiomycota	Alkali-sensitive linkage protein 1	UniRef90_A0A0C9YDH1 Unplaced genomic scaffold K443scaffold_7, whole genome shotgun sequence n=1 Tax=Laccaria amethystina LaAM-08-1 TaxID=1095629 RepID=A0A0C9YDH1_9AGAR	No hit	0	0	1	GH128(145-362)	SP(Sec/SPI)
AF_DN36852_c0_g1	0.0283139	0.0396567	6.03443	Basidiomycota	NA	UniRef90_A0A165BTG6 Uncharacterized protein n=1 Tax=Exidia glandulosa HHB12029 TaxID=1314781 RepID=A0A165BTG6_EXIGL	No hit	0.0143079	0.0199295	0.999699	No hit	0
AF_DN3358_c0_g1	0	0	6.02906	Ascomycota	Eukaryotic aspartyl protease	UniRef90_A0A225BAS2 Uncharacterized protein n=1 Tax=Talaromyces atroroseus TaxID=1441469 RepID=A0A225BAS2_9EURO	No hit	0	0	1	No hit	0
AF_DN22817_c0_g1	0	0	6.02714	Ascomycota	DNA nickase	UniRef90_A0A0D2YJN2 Uncharacterized protein n=4 Tax=Fusarium TaxID=5506 RepID=A0A0D2YJN2_FUSO4	No hit	0	0	1	No hit	0
AF_DN36055_c0_g1	0.105695	0.140457	6.01741	Ascomycota	NA	UniRef90_A0A1Y1ZKU7 Uncharacterized protein n=1 Tax=Clohesyomyces aquaticus TaxID=1231657 RepID=A0A1Y1ZKU7_9PLEO	No hit	0.0513828	0.0672134	0.996415	No hit	0
AF_DN32610_c0_g1	0	0	5.97639	Ascomycota	NA	UniRef90_A0A1Y1ZZK6 Ribosomal protein n=22 Tax=leotiomyceta TaxID=716546 RepID=A0A1Y1ZZK6_9PLEO	No hit	0	0	1	No hit	0
AF_DN6331_c0_g1	0	0	5.94589	Ascomycota	NA	UniRef90_H6C2Q6 Elongation factor EF-3 n=16 Tax=Herpotrichiellaceae TaxID=43219 RepID=H6C2Q6_EXODN	No hit	0	0	1	No hit	0
AF_DN39815_c0_g1	0	0.0071628	5.94296	Ascomycota	GPI-anchored cell wall organization protein Ecm33	UniRef90_A0A225AEZ4 Protein ecm33 n=1 Tax=Talaromyces atroroseus TaxID=1441469 RepID=A0A225AEZ4_9EURO	No hit	0	0.00368329	0.999993	No hit	SP(Sec/SPI)
AF_DN34289_c1_g1	0	0.0148546	5.9045	No hit found	C protein immunoglobulin-A-binding beta antigen	UniRef90_A0A0S1MKD5 Uncharacterized protein n=1 Tax=Phakopsora pachyrhizi TaxID=170000 RepID=A0A0S1MKD5_PHAPC	No hit	0	0.00763128	0.999971	No hit	SP(Sec/SPI)
AF_DN41868_c0_g1	0	0.00363853	5.85326	Ascomycota	NA	UniRef90_A0A177BXT6 DUF1752-domain-containing protein n=1 Tax=Paraphaeosphaeria sporulosa TaxID=1460663 RepID=A0A177BXT6_9PLEO	No hit	0	0.00188698	0.999998	No hit	0
AF_DN41115_c1_g1	0	0	5.83482	Ascomycota	Elongation factor 3	UniRef90_M3AMX2 ABC transporter, ABC-F family, GCN-EF3 type n=3 Tax=Mycosphaerellaceae TaxID=93133 RepID=M3AMX2_PSEFD	No hit	0	0	1	No hit	0
AF_DN68955_c0_g1	0	0	5.82592	Ascomycota	Formate dehydrogenase	UniRef90_A0A1C1CPU4 Formate dehydrogenase n=14 Tax=Eukaryota TaxID=2759 RepID=A0A1C1CPU4_9EURO	No hit	0	0	1	No hit	0
AF_DN40619_c0_g1	0	0	5.79783	No hit found	NA	No hits	No hit	0	0	1	No hit	SP(Sec/SPI)
AF_DN40233_c0_g1	0	0.0129047	5.77913	Ascomycota	NA	UniRef90_A0A1Y1ZXV0 Uncharacterized protein n=1 Tax=Clohesyomyces aquaticus TaxID=1231657 RepID=A0A1Y1ZXV0_9PLEO	No hit	0	0.0066995	0.999978	No hit	0
AF_DN44865_c0_g1	0	0.0158242	5.76374	Basidiomycota	NA	No hits	No hit	0	0.008213	0.999966	No hit	0
AF_DN2804_c0_g1	0	0	5.75021	Ascomycota	Mitochondrial ketol-acid reductoisomerase (Fragment)	UniRef90_R7Z5X5 Ketol-acid reductoisomerase, mitochondrial n=1 Tax=Coniosporium apollinis (strain CBS 100218) TaxID=1168221 RepID=R7Z5X5_CONA1	No hit	0	0	1	No hit	0
AF_DN93142_c0_g1	0	0	5.74413	Ascomycota	DDHD domain-containing protein	UniRef90_B2W0X5 Uncharacterized protein n=16 Tax=Pleosporales TaxID=92860 RepID=B2W0X5_PYRTR	No hit	0	0	1	No hit	0
AF_DN29221_c0_g1	0	0.008527	5.73055	Basidiomycota	Integral membrane protein sed5	UniRef90_A0A165EVD4 t-SNARE n=1 Tax=Exidia glandulosa HHB12029 TaxID=1314781 RepID=A0A165EVD4_EXIGL	No hit	0	0.00445322	0.99999	No hit	0
AF_DN61621_c0_g1	0	0	5.71821	Basidiomycota	60S ribosomal protein L10	UniRef90_B0DXN8 Predicted protein n=38 Tax=Agaricomycetes TaxID=155619 RepID=B0DXN8_LACBS	No hit	0	0	1	No hit	0
AF_DN1546_c0_g1	0	0	5.69427	Ascomycota	NA	UniRef90_B6QKX2 Uncharacterized protein n=1 Tax=Talaromyces marneffei (strain ATCC 18224 / CBS 334.59 / QM 7333) TaxID=441960 RepID=B6QKX2_TALMQ	No hit	0	0	1	No hit	0
AF_DN52265_c0_g1	0	0	5.6917	Ascomycota	NA	UniRef90_B8MC54 Mitochondrial Hsp70 chaperone (Ssc70), putative n=11 Tax=Eurotiales TaxID=5042 RepID=B8MC54_TALSN	Hsp70	0	0	1	No hit	0
AF_DN46275_c0_g1	0	0.00507903	5.68607	Basidiomycota	NA	No hits	No hit	0	0.00266636	0.999996	No hit	0
AF_DN35195_c0_g1	0	0.00567067	5.67923	Basidiomycota	NA	UniRef90_C4Y9M0 Uncharacterized protein n=1 Tax=Clavispora lusitaniae (strain ATCC 42720) TaxID=306902 RepID=C4Y9M0_CLAL4	No hit	0	0.00297768	0.999996	No hit	0
AF_DN34811_c1_g1	0	0	5.67333	Ascomycota	Translation elongation factor 2 (Fragment)	UniRef90_A0A178DXV7 p-loop containing nucleoside triphosphate hydrolase protein n=9 Tax=Dothideomycetes TaxID=147541 RepID=A0A178DXV7_9PLEO	No hit	0	0	1	No hit	0
AF_DN45634_c0_g1	0	0	5.65491	No hit found	NA	No hits	No hit	0	0	1	No hit	0
AF_DN101423_c0_g1	0	0.016307	5.63069	Ascomycota	DDHD domain-containing protein	UniRef90_A0A0D1YEX1 Uncharacterized protein n=1 Tax=Verruconis gallopava TaxID=253628 RepID=A0A0D1YEX1_9PEZI	No hit	0	0.00855039	0.999963	No hit	0
AF_DN83507_c0_g1	0	0.066543	5.62516	Ascomycota	NA	No hits	No hit	0	0.0340505	0.99942	No hit	0
AF_DN12810_c0_g1	0	0	5.5932	Basidiomycota	Conidiation-specific protein 6	UniRef90_A0A1M2VST3 Conidiation-specific protein 6 n=2 Tax=Trametes TaxID=5324 RepID=A0A1M2VST3_TRAPU	No hit	0	0	1	No hit	0
AF_DN46467_c0_g1	0	0.00325892	5.53881	Ascomycota	ATP-dependent chaperone ClpB	UniRef90_A0A177C215 Heat shock protein-like protein n=1 Tax=Paraphaeosphaeria sporulosa TaxID=1460663 RepID=A0A177C215_9PLEO	Hsp100	0	0.00173271	0.999998	GH6	0
AF_DN39500_c0_g1	0	0	5.5297	Ascomycota	Transcriptional regulator	UniRef90_A0A225ARU3 Uncharacterized protein n=1 Tax=Talaromyces atroroseus TaxID=1441469 RepID=A0A225ARU3_9EURO	No hit	0	0	1	No hit	0
AF_DN67852_c0_g1	0	0.015435	5.48938	Basidiomycota	Superoxide dismutase	UniRef90_A0A0H2S1B9 Superoxide dismutase n=1 Tax=Schizopora paradoxa TaxID=27342 RepID=A0A0H2S1B9_9HOMO	No hit	0	0.00818993	0.999966	No hit	0
AF_DN19352_c0_g1	0	0	5.43736	Basidiomycota	Phosphatidylglycerol phosphatidylinositol transfer	UniRef90_A0A165MCF8 Uncharacterized protein n=1 Tax=Exidia glandulosa HHB12029 TaxID=1314781 RepID=A0A165MCF8_EXIGL	No hit	0	0	1	No hit	SP(Sec/SPI)
AF_DN9715_c0_g1	0	0	5.43605	No hit found	NA	No hits	No hit	0	0	1	No hit	0
AF_DN66321_c0_g1	0.0639024	0	5.43121	Ascomycota	Response to stress	UniRef90_A0A2H3IPC9 Complex 1 LYR protein n=1 Tax=Penicillium occitanis TaxID=290292 RepID=A0A2H3IPC9_9EURO	ACD	0.0332638	0	0.999447	No hit	0
AF_DN27975_c0_g1	0	0.0587472	5.41688	Basidiomycota	Hmp1-mismatch base pair and cruciform DNA recognition	UniRef90_A0A0H2S7T2 Uncharacterized protein n=1 Tax=Schizopora paradoxa TaxID=27342 RepID=A0A0H2S7T2_9HOMO	No hit	0	0.0306948	0.999529	No hit	0
AF_DN41354_c0_g1	0	0	5.40646	Basidiomycota	Nadph oxidase b	UniRef90_J0WTA8 Uncharacterized protein n=2 Tax=Auriculariales TaxID=5226 RepID=J0WTA8_AURST	No hit	0	0	1	No hit	0
AF_DN35933_c0_g1	0	0	5.4056	Basidiomycota	NA	No hits	No hit	0	0	1	No hit	0
AF_DN42373_c0_g1	0	0.0120071	5.40377	No hit found	NA	UniRef90_A0A165DX07 Uncharacterized protein n=1 Tax=Exidia glandulosa HHB12029 TaxID=1314781 RepID=A0A165DX07_EXIGL	No hit	0	0.00642761	0.999979	No hit	0
AF_DN102199_c0_g1	0	0	5.3506	Basidiomycota	NA	UniRef90_A0A067T225 Uncharacterized protein n=1 Tax=Galerina marginata (strain CBS 339.88) TaxID=685588 RepID=A0A067T225_GALM3	No hit	0	0	1	No hit	0
AF_DN13064_c0_g1	0	0	5.34307	Ascomycota	Hydrolase	No hits	No hit	0	0	1	No hit	SP(Sec/SPI)
AF_DN6505_c0_g1	0	0	5.32277	Basidiomycota	Glutamate synthase small chain	UniRef90_A0A286UVQ5 NADPH-dependent glutamate synthase n=1 Tax=Phellinus noxius TaxID=418867 RepID=A0A286UVQ5_9HOMO	No hit	0	0	1	No hit	0
AF_DN39720_c0_g1	0	0.0265261	5.32193	Ascomycota	Response to stress	UniRef90_A0A178ALI8 Uncharacterized protein n=1 Tax=Stagonospora sp. SRC1lsM3a TaxID=765868 RepID=A0A178ALI8_9PLEO	No hit	0	0.014196	0.999899	No hit	0
AF_DN30632_c0_g1	0	0	5.31954	Basidiomycota	ATP-dependent RNA helicase	UniRef90_A0A165Q0G8 DEAD-domain-containing protein n=1 Tax=Exidia glandulosa HHB12029 TaxID=1314781 RepID=A0A165Q0G8_EXIGL	No hit	0	0	1	No hit	0
AF_DN85899_c0_g1	0	0	5.30068	Ascomycota	NA	UniRef90_A0A2H3I5P5 Uncharacterized protein n=1 Tax=Penicillium occitanis TaxID=290292 RepID=A0A2H3I5P5_9EURO	No hit	0	0	1	No hit	0
AF_DN103903_c0_g1	0	0	5.30017	Ascomycota	NA	UniRef90_A0A1Y1ZUK3 Uncharacterized protein n=1 Tax=Clohesyomyces aquaticus TaxID=1231657 RepID=A0A1Y1ZUK3_9PLEO	No hit	0	0	1	No hit	0
AF_DN93203_c0_g1	0	0	5.29993	Basidiomycota	2-nitropropane dioxygenase	UniRef90_A0A0H2RM57 2-nitropropane dioxygenase n=1 Tax=Schizopora paradoxa TaxID=27342 RepID=A0A0H2RM57_9HOMO	No hit	0	0	1	No hit	0
AF_DN32516_c0_g1	0	0	5.29112	Basidiomycota	Hydrophobin	UniRef90_A0A067TLC6 Hydrophobin n=1 Tax=Galerina marginata (strain CBS 339.88) TaxID=685588 RepID=A0A067TLC6_GALM3	No hit	0	0	1	No hit	SP(Sec/SPI)
AF_DN43274_c1_g1	0	0	5.26622	Ascomycota	NA	UniRef90_A0A1Y1ZZJ6 Uncharacterized protein n=1 Tax=Clohesyomyces aquaticus TaxID=1231657 RepID=A0A1Y1ZZJ6_9PLEO	No hit	0	0	1	No hit	0
AF_DN77503_c0_g1	0	0	5.2588	Ascomycota	Electron carrier	UniRef90_Q0TY36 Uncharacterized protein n=2 Tax=Dothideomycetes TaxID=147541 RepID=Q0TY36_PHANO	No hit	0	0	1	No hit	0
AF_DN25330_c0_g1	0	0	5.24675	Basidiomycota	Amino acid permease, putative	UniRef90_UPI0004416D34 hypothetical protein n=1 Tax=Punctularia strigosozonata (strain HHB-11173) TaxID=741275 RepID=UPI0004416D34	No hit	0	0	1	No hit	0
AF_DN37120_c0_g1	0	0	5.23676	Basidiomycota	MFS monosaccharide transporter	UniRef90_A0A067TQ88 Uncharacterized protein n=1 Tax=Galerina marginata (strain CBS 339.88) TaxID=685588 RepID=A0A067TQ88_GALM3	No hit	0	0	1	No hit	0
AF_DN44200_c0_g1	0	0.0196415	5.23528	Basidiomycota	Aconitate hydratase, mitochondrial	UniRef90_A0A0H2RYE3 Aconitate hydratase, mitochondrial n=1 Tax=Schizopora paradoxa TaxID=27342 RepID=A0A0H2RYE3_9HOMO	No hit	0	0.0106271	0.999944	No hit	0
AF_DN20962_c0_g1	0	0	5.23176	Basidiomycota	Hydrophobin	UniRef90_UPI0004409526 hydrophobin-251 n=1 Tax=Fomitiporia mediterranea (strain MF3/22) TaxID=694068 RepID=UPI0004409526	No hit	0	0	1	No hit	SP(Sec/SPI)
AF_DN33100_c0_g1	0	0.0112837	5.22884	Basidiomycota	Xylulose-5-phosphate phosphoketolase	UniRef90_A0A0H2RHH1 Phosphoketolase n=1 Tax=Schizopora paradoxa TaxID=27342 RepID=A0A0H2RHH1_9HOMO	No hit	0	0.00613405	0.999981	No hit	0
AF_DN23421_c0_g1	0	0	5.22396	Ascomycota	NA	UniRef90_A0A0N1H3N9 ATP-dependent RNA helicase DED1 n=1 Tax=Phialophora attae TaxID=1664694 RepID=A0A0N1H3N9_9EURO	No hit	0	0	1	No hit	0	gnl|TC-DB|O00571|1.I.1.1.3 ATP-dependent RNA helicase DDX3X OS=Homo sapiens GN=DDX3X PE=1 SV=3	79.0476
AF_DN25022_c0_g1	0	0.0467151	5.22135	Ascomycota	NA	UniRef90_A0A177DNY9 30 kDa heat shock protein n=1 Tax=Alternaria alternata TaxID=5599 RepID=A0A177DNY9_ALTAL	ACD	0	0.0249688	0.999688	No hit	0
AF_DN31620_c0_g1	0	0	5.22042	Ascomycota	NA	UniRef90_C4JX77 Elongation factor 3 n=5 Tax=Onygenales TaxID=33183 RepID=C4JX77_UNCRE	No hit	0	0	1	No hit	0
AF_DN107765_c0_g1	0	0	5.21326	Ascomycota	NA	UniRef90_A0A1Y2MGA7 Uncharacterized protein n=1 Tax=Epicoccum nigrum TaxID=105696 RepID=A0A1Y2MGA7_EPING	No hit	0	0	1	No hit	0
AF_DN44551_c0_g1	0	0	5.18873	Ascomycota	Transcription factor bhlh protein	UniRef90_A0A177CLL7 Uncharacterized protein n=1 Tax=Paraphaeosphaeria sporulosa TaxID=1460663 RepID=A0A177CLL7_9PLEO	No hit	0	0	1	No hit	0
AF_DN69213_c0_g1	0	0	5.18073	Ascomycota	NA	UniRef90_A0A0D2BBY2 Uncharacterized protein n=1 Tax=Verruconis gallopava TaxID=253628 RepID=A0A0D2BBY2_9PEZI	No hit	0	0	1	No hit	0
AF_DN22108_c0_g1	0	0	5.17874	No hit found	NA	No hits	No hit	0	0	1	No hit	0
AF_DN25958_c0_g1	0	0	5.17318	No hit found	NA	No hits	No hit	0	0	1	No hit	0
AF_DN17518_c0_g1	0	0	5.1465	Basidiomycota	NA	No hits	No hit	0	0	1	No hit	0
AF_DN33050_c0_g1	0	0	5.14321	Basidiomycota	NA	UniRef90_A0A0H2RNJ4 Histone H2B n=1 Tax=Schizopora paradoxa TaxID=27342 RepID=A0A0H2RNJ4_9HOMO	No hit	0	0	1	No hit	0
AF_DN40350_c0_g1	0	0	5.12467	Ascomycota	6-phosphogluconate dehydrogenase, decarboxylating	UniRef90_A0A1C1CDF6 30 kDa heat shock protein n=3 Tax=Cladophialophora TaxID=82105 RepID=A0A1C1CDF6_9EURO	ACD	0	0	1	No hit	0
AF_DN102373_c1_g1	0	0	5.12404	No hit found	NA	No hits	No hit	0	0	1	No hit	0
AF_DN32697_c0_g1	0	0.0268668	5.10137	Basidiomycota	MFS general substrate transporter	UniRef90_A0A0H2SJE2 Phosphate permease n=1 Tax=Schizopora paradoxa TaxID=27342 RepID=A0A0H2SJE2_9HOMO	No hit	0	0.0146581	0.999893	No hit	0	gnl|TC-DB|K4HTY2|2.A.1.9.11 Phosphate transporter OS=Boletus edulis GN=PT PE=2 SV=1	79.2453
AF_DN40489_c0_g1	0	0	5.09566	Ascomycota	Heat shock protein 30	UniRef90_C9SJE8 30 kDa heat shock protein n=3 Tax=Verticillium TaxID=1036719 RepID=C9SJE8_VERA1	ACD	0	0	1	No hit	0
AF_DN38689_c0_g1	0	0	5.06857	No hit found	NA	UniRef90_A0A0H2SNU3 Uncharacterized protein n=1 Tax=Schizopora paradoxa TaxID=27342 RepID=A0A0H2SNU3_9HOMO	No hit	0	0	1	No hit	0
AF_DN73454_c0_g1	0	0	5.06772	Ascomycota	NA	UniRef90_A0A163CE82 Transaldolase n=2 Tax=Didymellaceae TaxID=683158 RepID=A0A163CE82_DIDRA	No hit	0	0	1	No hit	0
AF_DN13029_c0_g1	0	0.0129764	5.06694	Ascomycota	50S ribosomal protein L25	UniRef90_A0A225BAR7 Uncharacterized protein n=1 Tax=Talaromyces atroroseus TaxID=1441469 RepID=A0A225BAR7_9EURO	No hit	0	0.00715121	0.999974	No hit	0
AF_DN107325_c0_g1	0	0	5.05078	Ascomycota	NA	UniRef90_A0A178EH95 SWIRM domain-containing protein FUN19 n=1 Tax=Pyrenochaeta sp. DS3sAY3a TaxID=765867 RepID=A0A178EH95_9PLEO	No hit	0	0	1	No hit	0
AF_DN108150_c0_g1	0	0	5.05009	Ascomycota	NA	No hits	No hit	0	0	1	No hit	0
AF_DN65042_c0_g1	0	0	5.04911	Ascomycota	Response to stress	UniRef90_A0A0G2F2J2 Putative 30 kDa heat shock protein n=1 Tax=Phaeomoniella chlamydospora TaxID=158046 RepID=A0A0G2F2J2_9EURO	ACD	0	0	1	No hit	0
AF_DN102624_c0_g1	0	0	5.01917	Basidiomycota	NA	UniRef90_A0A0D2L6D0 Uncharacterized protein n=1 Tax=Hypholoma sublateritium FD-334 SS-4 TaxID=945553 RepID=A0A0D2L6D0_9AGAR	No hit	0	0	1	No hit	0
AF_DN12520_c0_g1	0	0	5.01497	Basidiomycota	NA	UniRef90_A0A0H2RSR0 Catalase n=1 Tax=Schizopora paradoxa TaxID=27342 RepID=A0A0H2RSR0_9HOMO	No hit	0	0	1	No hit	0
AF_DN66192_c0_g1	0	0	5.01464	Ascomycota	NA	No hits	No hit	0	0	1	No hit	0
AF_DN27795_c0_g1	0.130359	0.102198	5.01334	Ascomycota	General substrate transporter	UniRef90_A0A178DIB3 Uncharacterized protein n=1 Tax=Pyrenochaeta sp. DS3sAY3a TaxID=765867 RepID=A0A178DIB3_9PLEO	No hit	0.0680451	0.0540355	0.996218	No hit	0
AF_DN64588_c1_g1	0	0	4.99108	Ascomycota	NA	UniRef90_A0A177CZ16 Uncharacterized protein n=1 Tax=Paraphaeosphaeria sporulosa TaxID=1460663 RepID=A0A177CZ16_9PLEO	No hit	0	0	1	No hit	0
AF_DN43165_c2_g1	0	0	4.98976	Ascomycota	NA	UniRef90_A0A0L1HK73 Uncharacterized protein n=1 Tax=Stemphylium lycopersici TaxID=183478 RepID=A0A0L1HK73_9PLEO	No hit	0	0	1	No hit	0
AF_DN60006_c0_g1	0	0	4.98153	Ascomycota	NA	UniRef90_A0A225B3P5 Uncharacterized protein n=1 Tax=Talaromyces atroroseus TaxID=1441469 RepID=A0A225B3P5_9EURO	No hit	0	0	1	No hit	0
AF_DN3165_c0_g1	0	0.0259573	4.96679	Ascomycota	Peroxiredoxin	UniRef90_A0A139IFP1 Uncharacterized protein n=2 Tax=Mycosphaerellaceae TaxID=93133 RepID=A0A139IFP1_9PEZI	No hit	0	0.0143452	0.999897	No hit	0
AF_DN8343_c0_g1	0	0	4.96381	Basidiomycota	Putative pyranose 2-oxidase	UniRef90_A0A0H2R1L3 Pyranose 2-oxidase n=1 Tax=Schizopora paradoxa TaxID=27342 RepID=A0A0H2R1L3_9HOMO	No hit	0	0	1	AA3_4(1-262)	0
AF_DN35371_c0_g1	0	0	4.96141	Ascomycota	Metal ion binding	UniRef90_A0A1Y1ZKU7 Uncharacterized protein n=1 Tax=Clohesyomyces aquaticus TaxID=1231657 RepID=A0A1Y1ZKU7_9PLEO	No hit	0	0	1	No hit	0
AF_DN40204_c0_g1	0	0	4.95825	Basidiomycota	NA	No hits	No hit	0	0	1	No hit	0
AF_DN26698_c0_g1	0	0	4.95535	Ascomycota	NA	No hits	No hit	0	0	1	No hit	0
AF_DN11211_c0_g1	0	0	4.95259	Basidiomycota	NA	UniRef90_A0A067T1M2 Uncharacterized protein n=1 Tax=Galerina marginata (strain CBS 339.88) TaxID=685588 RepID=A0A067T1M2_GALM3	No hit	0	0	1	No hit	0
AF_DN77895_c0_g1	0	0	4.94041	Basidiomycota	NA	UniRef90_F8Q6P7 Uncharacterized protein n=3 Tax=Agaricomycetidae TaxID=452333 RepID=F8Q6P7_SERL3	No hit	0	0	1	No hit	0
AF_DN38564_c0_g1	0	0	4.93198	Basidiomycota	NA	UniRef90_A0A1Y2I9I0 Uncharacterized protein n=1 Tax=Trametes coccinea BRFM310 TaxID=1353009 RepID=A0A1Y2I9I0_PYCCO	No hit	0	0	1	No hit	0
AF_DN12866_c0_g1	0	0	4.93102	Ascomycota	ATP-dependent RNA helicase DBP2	UniRef90_R7YS32 ATP-dependent RNA helicase dbp2 n=1 Tax=Coniosporium apollinis (strain CBS 100218) TaxID=1168221 RepID=R7YS32_CONA1	No hit	0	0	1	No hit	0	gnl|TC-DB|O00571|1.I.1.1.3 ATP-dependent RNA helicase DDX3X OS=Homo sapiens GN=DDX3X PE=1 SV=3	70.8738
AF_DN98215_c0_g1	0	0	4.92607	Basidiomycota	NA	UniRef90_A0A0H2S3T8 Glycoside hydrolase n=1 Tax=Schizopora paradoxa TaxID=27342 RepID=A0A0H2S3T8_9HOMO	No hit	0	0	1	No hit	0
AF_DN57529_c0_g1	0	0	4.92424	Ascomycota	Gpi anchored cell wall protein	No hits	No hit	0	0	1	No hit	SP(Sec/SPI)
AF_DN47970_c0_g1	0	0.00693013	4.92115	Basidiomycota	Bzip transcription factor	UniRef90_A0A0H2R4N9 Uncharacterized protein n=1 Tax=Schizopora paradoxa TaxID=27342 RepID=A0A0H2R4N9_9HOMO	No hit	0	0.00388308	0.999992	No hit	0
AF_DN104791_c0_g1	0	0	4.91243	Ascomycota	NA	UniRef90_A0A0P7BRB0 Uncharacterized protein n=1 Tax=Neonectria ditissima TaxID=78410 RepID=A0A0P7BRB0_9HYPO	No hit	0	0	1	No hit	0
AF_DN42876_c0_g1	0	0.0120351	4.90146	Ascomycota	GPI-anchored cell wall organization protein Ecm33	UniRef90_A0A177CIB0 Uncharacterized protein n=1 Tax=Paraphaeosphaeria sporulosa TaxID=1460663 RepID=A0A177CIB0_9PLEO	No hit	0	0.00673897	0.999977	No hit	0
AF_DN42369_c0_g1	0	0	4.89616	Ascomycota	NA	No hits	No hit	0	0	1	No hit	0
AF_DN58045_c0_g1	0	0	4.87981	No hit found	NA	UniRef90_A0A0H2S5K4 Uncharacterized protein n=1 Tax=Schizopora paradoxa TaxID=27342 RepID=A0A0H2S5K4_9HOMO	No hit	0	0	1	No hit	0
AF_DN44481_c0_g1	0	0.0360273	4.87251	Ascomycota	Similar to Saccharomyces cerevisiae YER148W SPT15 TATA-binding protein, general transcription factor that interacts with other factors to form the preinitiation complex at promoters	UniRef90_E4ZSJ9 Similar to transcription initiation factor TFIID n=17 Tax=Pleosporales TaxID=92860 RepID=E4ZSJ9_LEPMJ	No hit	0	0.0199892	0.9998	No hit	0
AF_DN19198_c0_g1	0	0	4.87082	Basidiomycota	PLC-like phosphodiesterase, TIM beta/alpha-barrel domain	UniRef90_A0A067SXQ9 Uncharacterized protein n=1 Tax=Galerina marginata (strain CBS 339.88) TaxID=685588 RepID=A0A067SXQ9_GALM3	No hit	0	0	1	No hit	0
AF_DN32733_c0_g1	0	0.0209886	4.85508	Basidiomycota	NA	UniRef90_A0A0H2R7Y8 Uncharacterized protein n=2 Tax=Schizopora paradoxa TaxID=27342 RepID=A0A0H2R7Y8_9HOMO	No hit	0	0.0117523	0.999931	No hit	0
AF_DN109382_c0_g1	0	0	4.8339	Basidiomycota	NA	No hits	No hit	0	0	1	No hit	0
AF_DN35497_c0_g1	0.0116812	0	4.83021	No hit found	NA	UniRef90_B3IXK3 Uncharacterized protein n=1 Tax=Alternaria alternata virus 1 TaxID=483537 RepID=B3IXK3_9VIRU	No hit	0.00658701	0	0.999978	No hit	0
AF_DN59802_c0_g1	0	0	4.80104	Basidiomycota	Carnitine O-acetyltransferase	UniRef90_A0A0H2RYN7 Acyltransferase ChoActase/COT/CPT n=1 Tax=Schizopora paradoxa TaxID=27342 RepID=A0A0H2RYN7_9HOMO	No hit	0	0	1	No hit	0
AF_DN42085_c0_g1	0	0.00915037	4.79816	Ascomycota	Negative regulator of sexual conjugation and meiosis	UniRef90_A0A1Q5Q9Q2 Uncharacterized protein n=1 Tax=Talaromyces atroroseus TaxID=1441469 RepID=A0A1Q5Q9Q2_9EURO	No hit	0	0.0051826	0.999987	No hit	0
AF_DN54808_c0_g1	0.0208106	0	4.79803	No hit found	NA	No hits	No hit	0.0117186	0	0.999931	No hit	0
AF_DN36019_c0_g1	0	0	4.79222	Ascomycota	Intradiol ring-cleavage dioxygenase	UniRef90_A0A1Y2A424 Intradiol ring-cleavage dioxygenase n=1 Tax=Clohesyomyces aquaticus TaxID=1231657 RepID=A0A1Y2A424_9PLEO	No hit	0	0	1	No hit	0
AF_DN35777_c0_g1	0	0	4.78969	Ascomycota	Membrane-associating domain-domain-containing protein	UniRef90_A0A225B659 Uncharacterized protein n=1 Tax=Talaromyces atroroseus TaxID=1441469 RepID=A0A225B659_9EURO	No hit	0	0	1	No hit	0
AF_DN76276_c0_g1	0	0.0168448	4.77776	Ascomycota	Period circadian protein, putative	No hits	No hit	0	0.00952314	0.999955	No hit	0
AF_DN30351_c0_g1	0.0056778	0.00399833	4.76735	Ascomycota	Chaperone protein dnaJ	UniRef90_B8MH32 Protein mitochondrial targeting protein (Mas1), putative n=6 Tax=Eurotiales TaxID=5042 RepID=B8MH32_TALSN	DnaJ	0.00323117	0.00227731	0.999992	No hit	0
AF_DN16597_c0_g1	0	0.0071944	4.75827	Ascomycota	Riboflavin aldehyde-forming enzyme	UniRef90_W2S4U9 Uncharacterized protein n=1 Tax=Cyphellophora europaea CBS 101466 TaxID=1220924 RepID=W2S4U9_9EURO	No hit	0	0.00409484	0.999992	No hit	SP(Sec/SPI)
AF_DN40617_c0_g1	0	0.0114972	4.75695	Ascomycota	Formate dehydrogenase-II	UniRef90_A0A1C1CPU4 Formate dehydrogenase n=14 Tax=Eukaryota TaxID=2759 RepID=A0A1C1CPU4_9EURO	No hit	0	0.0065307	0.999979	No hit	0
AF_DN20042_c0_g1	0	0	4.75473	Basidiomycota	NA	No hits	No hit	0	0	1	No hit	0
AF_DN36095_c0_g1	0	0	4.72078	No hit found	NA	UniRef90_J0LKF5 Uncharacterized protein n=1 Tax=Auricularia subglabra (strain TFB-10046 / SS5) TaxID=717982 RepID=J0LKF5_AURST	No hit	0	0	1	No hit	0
AF_DN43588_c0_g1	0	0.0102346	4.71021	Ascomycota	ATP dependent RNA helicase	UniRef90_V5FFP9 ATP dependent RNA helicase (Dbp1), putative n=1 Tax=Byssochlamys spectabilis (strain No. 5 / NBRC 109023)TaxID=1356009 RepID=V5FFP9_BYSSN	No hit	0	0.00584436	0.999983	No hit	0
AF_DN12414_c0_g1	0	0	4.69545	Ascomycota	Nucleic acid binding	UniRef90_A0A1Y1ZYH0 Actin cytoskeleton protein-like protein n=1 Tax=Clohesyomyces aquaticus TaxID=1231657 RepID=A0A1Y1ZYH0_9PLEO	No hit	0	0	1	No hit	0
AF_DN101951_c0_g1	0	0	4.69324	Ascomycota	NA	UniRef90_A0A1Y1ZQY0 Glycosyl hydrolase catalytic core-domain-containing protein n=1 Tax=Clohesyomyces aquaticus TaxID=1231657 RepID=A0A1Y1ZQY0_9PLEO	No hit	0	0	1	GH128(1-127)	0
AF_DN41599_c0_g1	0	0	4.67196	No hit found	NA	UniRef90_A0A165DHE1 Uncharacterized protein n=1 Tax=Exidia glandulosa HHB12029 TaxID=1314781 RepID=A0A165DHE1_EXIGL	No hit	0	0	1	No hit	0
AF_DN40389_c0_g1	0	0.00551893	4.6614	Ascomycota	MFS general substrate transporter	UniRef90_A0A178DQW4 High affinity glucose transporter RGT2 n=1 Tax=Pyrenochaeta sp. DS3sAY3a TaxID=765867 RepID=A0A178DQW4_9PLEO	No hit	0	0.00317461	0.999995	No hit	0	gnl|TC-DB|Q8J0V1|2.A.1.1.57 Monosaccharide transporter - Aspergillus niger.	75.1332
AF_DN10744_c0_g1	0	0	4.65919	Ascomycota	Antigenic thaumatin domain-containing protein	UniRef90_A0A1Y1ZH44 Uncharacterized protein n=1 Tax=Clohesyomyces aquaticus TaxID=1231657 RepID=A0A1Y1ZH44_9PLEO	No hit	0	0	1	No hit	0
AF_DN21064_c0_g1	0	0.0164712	4.6536	Basidiomycota	Hemerythrin HHE cation binding domain protein	UniRef90_A0A067T8C1 Uncharacterized protein n=1 Tax=Galerina marginata (strain CBS 339.88) TaxID=685588 RepID=A0A067T8C1_GALM3	No hit	0	0.00943043	0.999956	No hit	0
AF_DN77397_c0_g1	0	0.0359937	4.65265	Ascomycota	Mannitol dehydrogenase	UniRef90_A0A178DUB8 L-xylulose reductase-like protein n=1 Tax=Pyrenochaeta sp. DS3sAY3a TaxID=765867 RepID=A0A178DUB8_9PLEO	No hit	0	0.0204106	0.999792	No hit	0
AF_DN22807_c0_g1	0	0.0100448	4.63819	Ascomycota	Dehydrogenase with different specificitie	UniRef90_A0A2H3HXQ0 Short-chain dehydrogenase/reductase SDR n=1 Tax=Penicillium occitanis TaxID=290292 RepID=A0A2H3HXQ0_9EURO	No hit	0	0.00577862	0.999983	No hit	0
AF_DN82823_c0_g1	0.0082526	0.0068317	4.63273	Ascomycota	NA	UniRef90_A0A0L1I2R9 Glycosyltransferase family 1 protein n=1 Tax=Stemphylium lycopersici TaxID=183478 RepID=A0A0L1I2R9_9PLEO	No hit	0.00475449	0.00393866	0.999981	GT1	0
AF_DN40159_c0_g1	0	0	4.62366	Basidiomycota	NA	UniRef90_A0A067T3J8 Uncharacterized protein n=1 Tax=Galerina marginata (strain CBS 339.88) TaxID=685588 RepID=A0A067T3J8_GALM3	No hit	0	0	1	No hit	0
AF_DN84274_c0_g1	0	0.0435083	4.62162	Ascomycota	ATP-dependent RNA helicase eIF4A (Fragment)	UniRef90_A0A1L9V7E8 Uncharacterized protein n=1 Tax=Aspergillus glaucus CBS 516.65 TaxID=1160497 RepID=A0A1L9V7E8_ASPGL	No hit	0	0.0246583	0.999696	No hit	0	gnl|TC-DB|P38919|3.A.18.1.1 Eukaryotic initiation factor 4A-III - Homo sapiens (Human).	81.8182
AF_DN60492_c0_g1	0	0	4.60655	Basidiomycota	Putative NAD-dependent formate dehydrogenase (Fragment)	UniRef90_A0A0H2S5S2 Formate dehydrogenase n=1 Tax=Schizopora paradoxa TaxID=27342 RepID=A0A0H2S5S2_9HOMO	No hit	0	0	1	No hit	0
AF_DN90884_c0_g1	0	0	4.60624	Ascomycota	Proline-rich antigen	No hits	No hit	0	0	1	No hit	0
AF_DN33010_c0_g1	0	0.0213016	4.58853	Basidiomycota	Thiazole biosynthetic enzyme	UniRef90_A0A0H2RQM3 Thiamine thiazole synthase n=1 Tax=Schizopora paradoxa TaxID=27342 RepID=A0A0H2RQM3_9HOMO	No hit	0	0.0122486	0.999925	No hit	0
AF_DN96555_c0_g1	0	0.0260275	4.58052	Basidiomycota	NA	UniRef90_A0A0H2S1K0 Uncharacterized protein n=1 Tax=Schizopora paradoxa TaxID=27342 RepID=A0A0H2S1K0_9HOMO	No hit	0	0.0149433	0.999888	No hit	0
AF_DN60284_c0_g1	0	0	4.57706	Ascomycota	NA	UniRef90_A0A1Y1YQ53 HSP20-like chaperone n=1 Tax=Clohesyomyces aquaticus TaxID=1231657 RepID=A0A1Y1YQ53_9PLEO	ACD	0	0	1	No hit	0
AF_DN38189_c0_g1	0	0	4.57332	Ascomycota	NA	UniRef90_A0A1Y1YNL2 Uncharacterized protein n=1 Tax=Clohesyomyces aquaticus TaxID=1231657 RepID=A0A1Y1YNL2_9PLEO	No hit	0	0	1	No hit	0
AF_DN101711_c0_g1	0	0	4.5731	Ascomycota	Conidiation-specific protein con-10	No hits	No hit	0	0	1	No hit	0
AF_DN22820_c0_g1	0	0	4.54656	Basidiomycota	NA	UniRef90_A0A0C2XVV3 Uncharacterized protein n=1 Tax=Serendipita vermifera MAFF 305830 TaxID=933852 RepID=A0A0C2XVV3_9HOMO	No hit	0	0	1	No hit	0
AF_DN67551_c0_g1	0	0	4.51999	Basidiomycota	1 concanamycin induced protein c	UniRef90_UPI000441117F hypothetical protein n=1 Tax=Dichomitus squalens (strain LYAD-421) TaxID=732165 RepID=UPI000441117F	No hit	0	0	1	No hit	0
AF_DN71571_c0_g1	0	0	4.51896	Ascomycota	Stress-induced bacterial acidophilic repeat motif	UniRef90_B8M151 Conidiation-specific protein (Con-10), putative n=1 Tax=Talaromyces stipitatus (strain ATCC 10500 / CBS 375.48/ QM 6759 / NRRL 1006) TaxID=441959 RepID=B8M151_TALSN	No hit	0	0	1	No hit	0
AF_DN31975_c0_g1	0	0	4.50055	No hit found	NA	UniRef90_A0A165NVQ3 Uncharacterized protein n=1 Tax=Exidia glandulosa HHB12029 TaxID=1314781 RepID=A0A165NVQ3_EXIGL	No hit	0	0	1	No hit	0
AF_DN75108_c0_g1	0	0	4.47959	No hit found	NA	UniRef90_A0A067TDN4 Uncharacterized protein n=1 Tax=Galerina marginata (strain CBS 339.88) TaxID=685588 RepID=A0A067TDN4_GALM3	No hit	0	0	1	No hit	SP(Sec/SPI)
AF_DN107707_c0_g1	0.0766027	0	4.47049	Ascomycota	NA	UniRef90_A0A177CL23 HSP20-like chaperone n=1 Tax=Paraphaeosphaeria sporulosa TaxID=1460663 RepID=A0A177CL23_9PLEO	ACD	0.0433931	0	0.999058	No hit	0
AF_DN10417_c0_g1	0	0	4.4631	Basidiomycota	Conidiation-specific protein 6	UniRef90_A0A067T225 Uncharacterized protein n=1 Tax=Galerina marginata (strain CBS 339.88) TaxID=685588 RepID=A0A067T225_GALM3	No hit	0	0	1	No hit	0
AF_DN16288_c0_g1	0	0.0267444	4.44997	Asco or Basidio	Heat shock protein (Fragment)	UniRef90_A0A146IG94 Uncharacterized protein n=1 Tax=Mycena chlorophos TaxID=658473 RepID=A0A146IG94_9AGAR	Hsp70	0	0.0155636	0.999879	No hit	0
AF_DN65373_c0_g1	0	0	4.44014	Ascomycota	Heat shock protein 16	UniRef90_Q0V0I8 Uncharacterized protein n=1 Tax=Phaeosphaeria nodorum (strain SN15 / ATCC MYA-4574 / FGSC 10173) TaxID=321614 RepID=Q0V0I8_PHANO	ACD	0	0	1	No hit	0
AF_DN73706_c0_g1	0	0.0188023	4.43905	Ascomycota	Armadillo-type fold	UniRef90_A0A225AN46 Hsp70 nucleotide exchange factor fes1 n=1 Tax=Talaromyces atroroseus TaxID=1441469 RepID=A0A225AN46_9EURO	No hit	0	0.0109982	0.99994	No hit	0
AF_DN9624_c0_g1	0	0	4.42887	Basidiomycota	NA	UniRef90_A0A0H2S477 DUF914-domain-containing protein n=1 Tax=Schizopora paradoxa TaxID=27342 RepID=A0A0H2S477_9HOMO	No hit	0	0	1	No hit	0
AF_DN29228_c0_g1	0	0	4.42855	Ascomycota	Vegetative cell wall protein gp1	UniRef90_W2RZ93 Uncharacterized protein n=1 Tax=Cyphellophora europaea CBS 101466 TaxID=1220924 RepID=W2RZ93_9EURO	No hit	0	0	1	No hit	0
AF_DN41256_c0_g1	0	0.0106929	4.42153	Basidiomycota	Aspartic protease	UniRef90_A0A0H2RVH3 Acid protease n=1 Tax=Schizopora paradoxa TaxID=27342 RepID=A0A0H2RVH3_9HOMO	No hit	0	0.00629202	0.99998	No hit	0
AF_DN32800_c0_g1	0	0	4.41984	Basidiomycota	Riboflavin aldehyde-forming enzyme	UniRef90_A0A0C9XZ17 Unplaced genomic scaffold K443scaffold_15, whole genome shotgun sequence n=1 Tax=Laccaria amethystina LaAM-08-1 TaxID=1095629 RepID=A0A0C9XZ17_9AGAR	No hit	0	0	1	No hit	SP(Sec/SPI)
AF_DN104126_c0_g1	0	0	4.41961	Ascomycota	NA	UniRef90_R7YNI5 Uncharacterized protein n=1 Tax=Coniosporium apollinis (strain CBS 100218) TaxID=1168221 RepID=R7YNI5_CONA1	No hit	0	0	1	No hit	0
AF_DN56275_c0_g1	0.0121351	0.0085095	4.41948	Ascomycota	Nucleotide-binding, alpha-beta plait	UniRef90_W2SGT3 Uncharacterized protein n=1 Tax=Cyphellophora europaea CBS 101466 TaxID=1220924 RepID=W2SGT3_9EURO	No hit	0.00713703	0.00501372	0.999962	No hit	0
AF_DN33413_c0_g1	0	0	4.41891	Basidiomycota	Chaperone protein DnaJ	UniRef90_A0A0H2RIE8 DnaJ-domain-containing protein n=1 Tax=Schizopora paradoxa TaxID=27342 RepID=A0A0H2RIE8_9HOMO	DnaJ	0	0	1	No hit	0
AF_DN56520_c0_g1	0	0	4.41849	Ascomycota	NA	No hits	No hit	0	0	1	No hit	SP(Sec/SPI)
AF_DN37240_c0_g1	0	0.0323101	4.41044	Basidiomycota	7alpha-cephem-methoxylase p8 chain related protein	UniRef90_A0A0H2RIY9 Uncharacterized protein n=1 Tax=Schizopora paradoxa TaxID=27342 RepID=A0A0H2RIY9_9HOMO	No hit	0	0.0188313	0.999823	No hit	0
AF_DN24967_c0_g1	0	0	4.40913	Basidiomycota	NA	No hits	No hit	0	0	1	No hit	0
AF_DN23647_c0_g1	0	0	4.39855	Basidiomycota	40S ribosomal protein S12	UniRef90_A0A0H2R798 40S ribosomal protein S12 n=1 Tax=Schizopora paradoxa TaxID=27342 RepID=A0A0H2R798_9HOMO	No hit	0	0	1	No hit	0
AF_DN64849_c0_g1	0	0	4.39794	Ascomycota	NA	UniRef90_A0A0G2EE88 Putative stress-responsive protein ish1 n=2 Tax=Diplodia TaxID=66735 RepID=A0A0G2EE88_9PEZI	No hit	0	0	1	No hit	0
AF_DN84136_c0_g1	0	0	4.39721	Ascomycota	PR domain zinc finger protein 16	UniRef90_A0A1Y2ABV9 Uncharacterized protein n=1 Tax=Clohesyomyces aquaticus TaxID=1231657 RepID=A0A1Y2ABV9_9PLEO	No hit	0	0	1	No hit	0
AF_DN28961_c0_g1	0	0	4.39552	Ascomycota	PR domain zinc finger protein 16	UniRef90_A0A1Y2ABV9 Uncharacterized protein n=1 Tax=Clohesyomyces aquaticus TaxID=1231657 RepID=A0A1Y2ABV9_9PLEO	No hit	0	0	1	No hit	0
AF_DN37743_c0_g1	0	0.025543	4.3817	Basidiomycota	Nitrogen catabolite repression transcriptional regulator	UniRef90_A0A0H2RC86 Glutathione S-transferase n=1 Tax=Schizopora paradoxa TaxID=27342 RepID=A0A0H2RC86_9HOMO	No hit	0	0.0149847	0.999888	No hit	0
AF_DN40278_c0_g1	0	0.0046028	4.37316	Ascomycota	NA	UniRef90_A0A2P4KN30 Uncharacterized protein n=1 Tax=Quercus suber TaxID=58331 RepID=A0A2P4KN30_QUESU	No hit	0	0.00273116	0.999996	No hit	0
AF_DN30388_c0_g1	0	0.00714197	4.36639	Ascomycota	Plasma membrane fusion involved in cytogamy	UniRef90_A0A1Y2A9R8 Uncharacterized protein n=1 Tax=Clohesyomyces aquaticus TaxID=1231657 RepID=A0A1Y2A9R8_9PLEO	No hit	0	0.00423563	0.999991	No hit	0
AF_DN37301_c0_g1	0	0	4.36171	Ascomycota	NA	No hits	No hit	0	0	1	No hit	0
AF_DN32471_c0_g1	0	0.0124091	4.35629	Basidiomycota	Inosine-5'-monophosphate dehydrogenase	UniRef90_A0A0H2S4K6 Inosine-5'-monophosphate dehydrogenase n=1 Tax=Schizopora paradoxa TaxID=27342 RepID=A0A0H2S4K6_9HOMO	No hit	0	0.00734828	0.999973	No hit	0
AF_DN96756_c0_g1	0	0.0143197	4.34867	Ascomycota	NA	UniRef90_A0A0G2HKP1 Putative pheromone-regulated multispanning membrane protein n=1 Tax=Phaeomoniella chlamydospora TaxID=158046 RepID=A0A0G2HKP1_9EURO	No hit	0	0.0084788	0.999964	No hit	0
AF_DN65324_c0_g1	0	0	4.34321	Ascomycota	Matrix metalloproteinase-11	UniRef90_A0A231M3F0 Uncharacterized protein n=1 Tax=Aspergillus thermomutatus TaxID=41047 RepID=A0A231M3F0_9EURO	No hit	0	0	1	No hit	0
AF_DN80683_c0_g1	0	0	4.3382	Basidiomycota	NA	UniRef90_D6RN00 Uncharacterized protein n=1 Tax=Coprinopsis cinerea (strain Okayama-7 / 130 / ATCC MYA-4618 / FGSC 9003)TaxID=240176 RepID=D6RN00_COPC7	No hit	0	0	1	No hit	0
AF_DN30072_c0_g1	0	0	4.33456	Ascomycota	Zinc finger C2H2-type/integrase DNA-binding domain	UniRef90_A0A1Y2ABV9 Uncharacterized protein n=1 Tax=Clohesyomyces aquaticus TaxID=1231657 RepID=A0A1Y2ABV9_9PLEO	No hit	0	0	1	No hit	0
AF_DN106433_c0_g1	0	0	4.3342	Ascomycota	NA	UniRef90_A0A1Y1ZM14 HSP20-like chaperone n=1 Tax=Clohesyomyces aquaticus TaxID=1231657 RepID=A0A1Y1ZM14_9PLEO	No hit	0	0	1	No hit	0
AF_DN102675_c0_g1	0.0396924	0.137362	4.32779	No hit found	NA	UniRef90_A0A0G2E8W2 Uncharacterized protein n=1 Tax=Phaeomoniella chlamydospora TaxID=158046 RepID=A0A0G2E8W2_9EURO	No hit	0.0231926	0.07669	0.996785	No hit	SP(Sec/SPI)
AF_DN28885_c0_g1	0	0	4.32411	Basidiomycota	ATP-utilizing phosphoenolpyruvate carboxykinase (Fragment)	UniRef90_A0A0H2SCL2 ATP-utilizing phosphoenolpyruvate carboxykinase n=1 Tax=Schizopora paradoxa TaxID=27342 RepID=A0A0H2SCL2_9HOMO	No hit	0	0	1	No hit	0
AF_DN41352_c0_g1	0	0	4.31741	Basidiomycota	NA	UniRef90_A0A067TH18 Uncharacterized protein n=1 Tax=Galerina marginata (strain CBS 339.88) TaxID=685588 RepID=A0A067TH18_GALM3	No hit	0	0	1	No hit	SP(Sec/SPI)
AF_DN66407_c0_g1	0	0	4.31205	Ascomycota	Response to stress	UniRef90_A0A1Y1ZM14 HSP20-like chaperone n=1 Tax=Clohesyomyces aquaticus TaxID=1231657 RepID=A0A1Y1ZM14_9PLEO	ACD	0	0	1	No hit	0
AF_DN80210_c0_g1	0	0	4.30167	Ascomycota	NA	UniRef90_A0A1Y1Z3F1 Beta-hexosaminidase n=1 Tax=Clohesyomyces aquaticus TaxID=1231657 RepID=A0A1Y1Z3F1_9PLEO	No hit	0	0	1	No hit	0
AF_DN9655_c0_g1	0	0	4.28006	Basidiomycota	NA	UniRef90_A0A0H2RZJ6 NAD-binding protein n=1 Tax=Schizopora paradoxa TaxID=27342 RepID=A0A0H2RZJ6_9HOMO	No hit	0	0	1	No hit	0
AF_DN33488_c0_g2	0.0137072	0	4.27249	Ascomycota	Clock-controlled protein 6	UniRef90_R7YUN5 Uncharacterized protein n=1 Tax=Coniosporium apollinis (strain CBS 100218) TaxID=1168221 RepID=R7YUN5_CONA1	No hit	0.00818867	0	0.999966	No hit	SP(Sec/SPI)
AF_DN751_c0_g1	0	0	4.2498	Basidiomycota	NA	UniRef90_A0A067SRB2 Uncharacterized protein n=1 Tax=Galerina marginata (strain CBS 339.88) TaxID=685588 RepID=A0A067SRB2_GALM3	No hit	0	0	1	No hit	0
AF_DN97761_c0_g1	0	0	4.24813	Ascomycota	NA	UniRef90_A0A225AS94 Uncharacterized protein n=1 Tax=Talaromyces atroroseus TaxID=1441469 RepID=A0A225AS94_9EURO	No hit	0	0	1	No hit	0
AF_DN103301_c0_g1	0	0.0500243	4.24605	Ascomycota	NA	UniRef90_A0A1Y1LUS9 Uncharacterized protein (Fragment) n=1 Tax=Photinus pyralis TaxID=7054 RepID=A0A1Y1LUS9_PHOPY	No hit	0	0.0294377	0.999567	No hit	0
AF_DN4954_c0_g1	0	0.0311195	4.2299	No hit found	NA	UniRef90_A0A0H2RR68 Uncharacterized protein n=1 Tax=Schizopora paradoxa TaxID=27342 RepID=A0A0H2RR68_9HOMO	No hit	0	0.0185203	0.999828	No hit	0
AF_DN96272_c0_g1	0	0	4.22955	Basidiomycota	NA	UniRef90_A0A0H2RM29 Flavocytochrome c n=1 Tax=Schizopora paradoxa TaxID=27342 RepID=A0A0H2RM29_9HOMO	No hit	0	0	1	No hit	0
AF_DN23211_c0_g1	0	0	4.22547	Ascomycota	DDHD domain-containing protein	UniRef90_B8LTP6 Uncharacterized protein n=5 Tax=Eurotiales TaxID=5042 RepID=B8LTP6_TALSN	No hit	0	0	1	No hit	0
AF_DN55662_c0_g1	0	0.0100731	4.21829	Basidiomycota	Alpha/beta-hydrolase	UniRef90_A0A0H2R1D0 Alpha/beta-hydrolase (Fragment) n=1 Tax=Schizopora paradoxa TaxID=27342 RepID=A0A0H2R1D0_9HOMO	No hit	0	0.00606628	0.999982	CE10(12-286)	0
AF_DN55426_c0_g1	0	0.095077	4.21725	Basidiomycota	Conidiation-specific protein 6	UniRef90_UPI0004417E03 hypothetical protein n=1 Tax=Punctularia strigosozonata (strain HHB-11173) TaxID=741275 RepID=UPI0004417E03	No hit	0	0.0548967	0.998492	No hit	0
AF_DN16804_c0_g1	0	0	4.20698	Ascomycota	NA	UniRef90_A0A1E2YFR4 Hsp90-like protein n=3 Tax=Paracoccidioides brasiliensis TaxID=121759 RepID=A0A1E2YFR4_PARBR	Hsp90	0	0	1	No hit	0	gnl|TC-DB|P08238|8.A.163.1.1 Heat shock protein HSP 90-beta OS=Homo sapiens OX=9606 GN=HSP90AB1 PE=1 SV=4	72.4138
AF_DN9071_c0_g1	0	0.0111757	4.20193	Basidiomycota	Proline-rich protein	UniRef90_A0A0D0B515 Unplaced genomic scaffold CY34scaffold_3, whole genome shotgun sequence n=1 Tax=Suillus luteus UH-Slu-Lm8-n1 TaxID=930992 RepID=A0A0D0B515_9HOMO	No hit	0	0.00673937	0.999977	No hit	0
AF_DN86218_c0_g1	0	0	4.19903	Ascomycota	NA	UniRef90_A0A225BAS2 Uncharacterized protein n=1 Tax=Talaromyces atroroseus TaxID=1441469 RepID=A0A225BAS2_9EURO	No hit	0	0	1	No hit	0
AF_DN34039_c0_g1	0	0.0571213	4.19232	No hit found	NA	UniRef90_A0A0H2RSA3 Uncharacterized protein n=1 Tax=Schizopora paradoxa TaxID=27342 RepID=A0A0H2RSA3_9HOMO	No hit	0	0.0337048	0.999432	No hit	0
AF_DN18873_c0_g1	0	0	4.18483	Basidiomycota	NA	UniRef90_A0A0H2SHP1 Uncharacterized protein n=1 Tax=Schizopora paradoxa TaxID=27342 RepID=A0A0H2SHP1_9HOMO	No hit	0	0	1	No hit	SP(Sec/SPI)
AF_DN75263_c0_g1	0	0	4.17105	Ascomycota	Disulfide-isomerase A3	UniRef90_A0A1Y1ZZY2 Protein disulfide-isomerase n=1 Tax=Clohesyomyces aquaticus TaxID=1231657 RepID=A0A1Y1ZZY2_9PLEO	No hit	0	0	1	No hit	0
AF_DN27224_c0_g1	0	0	4.17087	Basidiomycota	Heat shock protein 83	UniRef90_S7QG80 HSP90-domain-containing protein n=3 Tax=Agaricomycetes TaxID=155619 RepID=S7QG80_GLOTA	Hsp90	0	0	1	No hit	0	gnl|TC-DB|P08238|8.A.163.1.1 Heat shock protein HSP 90-beta OS=Homo sapiens OX=9606 GN=HSP90AB1 PE=1 SV=4	73.7864
AF_DN55078_c0_g1	0	0	4.16148	Basidiomycota	NA	UniRef90_A0A2A9NUM4 Uncharacterized protein n=1 Tax=Amanita thiersii Skay4041 TaxID=703135 RepID=A0A2A9NUM4_9AGAR	No hit	0	0	1	No hit	0
AF_DN66535_c0_g1	0	0	4.1598	Basidiomycota	NA	UniRef90_E2LWP2 Uncharacterized protein n=3 Tax=Moniliophthora TaxID=221102 RepID=E2LWP2_MONPE	No hit	0	0	1	No hit	0
AF_DN18248_c0_g1	0	0.0297254	4.15223	Basidiomycota	Rh-like protein/ammonium transporter	UniRef90_A0A0H2RIZ3 Ammonium transporter n=1 Tax=Schizopora paradoxa TaxID=27342 RepID=A0A0H2RIZ3_9HOMO	No hit	0	0.0178645	0.99984	No hit	0	gnl|TC-DB|Q8NKD5|1.A.11.3.3 Ammonium transporter - Hebeloma cylindrosporum.	72.7626
AF_DN97319_c0_g1	0	0	4.14814	Ascomycota	NA	UniRef90_A0A1L9V7E8 Uncharacterized protein n=1 Tax=Aspergillus glaucus CBS 516.65 TaxID=1160497 RepID=A0A1L9V7E8_ASPGL	No hit	0	0	1	No hit	0
AF_DN38890_c0_g1	0.0075962	0.00534253	4.14217	Basidiomycota	Fumarate reductase flavoprotein subunit	UniRef90_A0A0H2RM29 Flavocytochrome c n=1 Tax=Schizopora paradoxa TaxID=27342 RepID=A0A0H2RM29_9HOMO	No hit	0.00462136	0.00325393	0.999984	No hit	0
AF_DN102805_c0_g1	0	0	4.14185	Ascomycota	Actin cortical patch SUR7/pH-response regulator PalI	UniRef90_A0A093W054 SUR7 family protein pun1 n=3 Tax=Eurotiales TaxID=5042 RepID=A0A093W054_TALMA	No hit	0	0	1	No hit	0
AF_DN91096_c0_g1	0	0	4.13195	Basidiomycota	Zinc transporter 1	UniRef90_A0A0H2RBV4 Cation efflux protein n=1 Tax=Schizopora paradoxa TaxID=27342 RepID=A0A0H2RBV4_9HOMO	No hit	0	0	1	No hit	0
AF_DN9556_c0_g1	0	0	4.12456	Ascomycota	NA	UniRef90_A0A177CL23 HSP20-like chaperone n=1 Tax=Paraphaeosphaeria sporulosa TaxID=1460663 RepID=A0A177CL23_9PLEO	ACD	0	0	1	No hit	0
AF_DN34370_c0_g1	0	0	4.122	Basidiomycota	Carbohydrate-binding module family 50 protein	UniRef90_A0A1C7MLJ6 Uncharacterized protein n=1 Tax=Grifola frondosa TaxID=5627 RepID=A0A1C7MLJ6_GRIFR	No hit	0	0	1	No hit	SP(Sec/SPI)
AF_DN55239_c0_g1	0	0	4.12076	Ascomycota	NA	UniRef90_R0KE65 Uncharacterized protein n=1 Tax=Setosphaeria turcica (strain 28A) TaxID=671987 RepID=R0KE65_SETT2	No hit	0	0	1	No hit	0
AF_DN39020_c0_g1	0	0.0250833	4.11999	Ascomycota	NA	UniRef90_A0A178ATR9 Uncharacterized protein n=1 Tax=Stagonospora sp. SRC1lsM3a TaxID=765868 RepID=A0A178ATR9_9PLEO	No hit	0	0.0151676	0.999885	No hit	0
AF_DN33251_c0_g1	0	0	4.10897	Ascomycota	GPI anchored CFEM domain-containing protein	UniRef90_A0A177CZY4 GPI anchored CFEM domain-containing protein n=1 Tax=Paraphaeosphaeria sporulosa TaxID=1460663 RepID=A0A177CZY4_9PLEO	No hit	0	0	1	No hit	0
AF_DN7440_c0_g1	0	0	4.10316	Ascomycota	NA	UniRef90_F0XMF4 Heat shock protein 90 n=5 Tax=Ophiostomataceae TaxID=5152 RepID=F0XMF4_GROCL	Hsp90	0	0	1	No hit	0	gnl|TC-DB|P08238|8.A.163.1.1 Heat shock protein HSP 90-beta OS=Homo sapiens OX=9606 GN=HSP90AB1 PE=1 SV=4	82.0755
AF_DN58639_c0_g1	0	0	4.10087	No hit found	NA	No hits	No hit	0	0	1	No hit	SP(Sec/SPI)
AF_DN55084_c0_g1	0	0.0162702	4.10027	Basidiomycota	RNA-binding domain-containing	UniRef90_A0A0H2RLQ5 RNA-binding domain-containing protein n=1 Tax=Schizopora paradoxa TaxID=27342 RepID=A0A0H2RLQ5_9HOMO	No hit	0	0.00990519	0.999951	No hit	0
AF_DN84511_c0_g1	0	0	4.09471	Basidiomycota	RNA-binding domain-containing	UniRef90_A0A2A9NWZ0 Uncharacterized protein n=1 Tax=Amanita thiersii Skay4041 TaxID=703135 RepID=A0A2A9NWZ0_9AGAR	No hit	0	0	1	No hit	0
AF_DN75895_c0_g1	0	0	4.09403	Ascomycota	NA	UniRef90_A0A225B3J1 Uncharacterized protein n=1 Tax=Talaromyces atroroseus TaxID=1441469 RepID=A0A225B3J1_9EURO	No hit	0	0	1	No hit	0
AF_DN43022_c0_g1	0	0	4.08276	Basidiomycota	Cytochrome b2 (L-lactate ferricytochrome C oxidoreductase)	UniRef90_A0A0H2SFA6 Uncharacterized protein n=1 Tax=Schizopora paradoxa TaxID=27342 RepID=A0A0H2SFA6_9HOMO	No hit	0	0	1	No hit	0
AF_DN93266_c0_g1	0	0	4.0764	Ascomycota	High-affinity glucose transporter	UniRef90_A0A1Y1ZT16 High affinity glucose transporter n=1 Tax=Clohesyomyces aquaticus TaxID=1231657 RepID=A0A1Y1ZT16_9PLEO	No hit	0	0	1	No hit	0
AF_DN59091_c0_g1	0	0.0795757	4.07597	Basidiomycota	NA	UniRef90_A0A0H2RB03 MFS general substrate transporter n=1 Tax=Schizopora paradoxa TaxID=27342 RepID=A0A0H2RB03_9HOMO	No hit	0	0.0470805	0.998891	No hit	0
AF_DN83694_c0_g1	0.038227	0	4.06921	Ascomycota	NA	UniRef90_A0A225ADN7 Aldehyde dehydrogenase n=1 Tax=Talaromyces atroroseus TaxID=1441469 RepID=A0A225ADN7_9EURO	No hit	0.0231055	0	0.999733	No hit	0
AF_DN38591_c0_g1	0	0	4.05881	Ascomycota	Elongation factor 3	UniRef90_W2SBL5 Uncharacterized protein n=1 Tax=Cyphellophora europaea CBS 101466 TaxID=1220924 RepID=W2SBL5_9EURO	No hit	0	0	1	No hit	0
AF_DN19381_c0_g1	0	0.0934303	4.05711	No hit found	NA	UniRef90_A0A0H2RSM0 Uncharacterized protein n=1 Tax=Schizopora paradoxa TaxID=27342 RepID=A0A0H2RSM0_9HOMO	No hit	0	0.0550252	0.998485	No hit	0
AF_DN60410_c0_g1	0	0.026076	4.0543	No hit found	NA	No hits	No hit	0	0.0158857	0.999874	No hit	0
AF_DN26909_c0_g1	0	0.0369657	4.04912	Basidiomycota	Tyrosine 3-monooxygenase/tryptophan 5-monooxygenase activation protein	UniRef90_UPI00029F670B 14-3-3 protein n=1 Tax=Agaricus bisporus var. bisporus (strain H97 / ATCC MYA-4626 / FGSC 10389) TaxID=936046 RepID=UPI00029F670B	No hit	0	0.0224119	0.999749	No hit	0	gnl|TC-DB|P48349|8.A.98.1.8 14-3-3-like protein GF14 lambda OS=Arabidopsis thaliana GN=GRF6 PE=1 SV=1	72.549
AF_DN55016_c0_g1	0	0	4.03874	Ascomycota	GPI-anchored cell wall organization protein Ecm33	UniRef90_W2SBI4 Uncharacterized protein n=1 Tax=Cyphellophora europaea CBS 101466 TaxID=1220924 RepID=W2SBI4_9EURO	No hit	0	0	1	No hit	SP(Sec/SPI)
AF_DN36508_c0_g1	0	0	4.03535	Ascomycota	NA	UniRef90_A0A0D2BBY2 Uncharacterized protein n=1 Tax=Verruconis gallopava TaxID=253628 RepID=A0A0D2BBY2_9PEZI	No hit	0	0	1	No hit	0
AF_DN59530_c0_g1	0	0	4.03358	No hit found	NA	UniRef90_A0A0H2RNJ1 Uncharacterized protein n=1 Tax=Schizopora paradoxa TaxID=27342 RepID=A0A0H2RNJ1_9HOMO	No hit	0	0	1	No hit	0
AF_DN101307_c0_g1	0	0	4.0302	Basidiomycota	NA	UniRef90_A0A0H2RYD8 Uncharacterized protein n=1 Tax=Schizopora paradoxa TaxID=27342 RepID=A0A0H2RYD8_9HOMO	No hit	0	0	1	No hit	0
AF_DN88352_c0_g1	0	0	4.02518	Basidiomycota	NA	UniRef90_A0A0H2RHK3 Uncharacterized protein n=1 Tax=Schizopora paradoxa TaxID=27342 RepID=A0A0H2RHK3_9HOMO	No hit	0	0	1	No hit	0
AF_DN82652_c0_g1	0	0.0295883	4.02516	Basidiomycota	HHE domain-containing	UniRef90_A0A0H2RTN6 Uncharacterized protein n=1 Tax=Schizopora paradoxa TaxID=27342 RepID=A0A0H2RTN6_9HOMO	No hit	0	0.0180583	0.999837	No hit	0
AF_DN32619_c0_g1	0	0	4.02514	Ascomycota	Multiprotein-bridging factor	UniRef90_B8MTC2 Coactivator bridging factor 1 (Mbf1), putative n=6 Tax=Eurotiales TaxID=5042 RepID=B8MTC2_TALSN	No hit	0	0	1	No hit	0
AF_DN42033_c0_g1	0	0.00677877	4.02398	Basidiomycota	Carboxylic ester hydrolase	UniRef90_A0A165BMR5 Alpha/beta-hydrolase n=2 Tax=Exidia glandulosa HHB12029 TaxID=1314781 RepID=A0A165BMR5_EXIGL	No hit	0	0.0041852	0.999991	CE10(39-201)	0
AF_DN55021_c0_g1	0	0	4.0189	Ascomycota	Glutathione peroxidase	UniRef90_A0A1Y1ZGS0 Glutathione peroxidase n=1 Tax=Clohesyomyces aquaticus TaxID=1231657 RepID=A0A1Y1ZGS0_9PLEO	No hit	0	0	1	No hit	0
AF_DN4696_c0_g1	0	0	4.01424	Ascomycota	NA	No hits	No hit	0	0	1	No hit	0
AF_DN1448_c0_g1	0	0	4.01253	Ascomycota	NA	UniRef90_A0A225ARR1 Uncharacterized protein n=1 Tax=Talaromyces atroroseus TaxID=1441469 RepID=A0A225ARR1_9EURO	No hit	0	0	1	No hit	0
AF_DN99466_c0_g1	0	0	4.01214	Ascomycota	NA	UniRef90_R1GNS6 Putative atp-dependent rna helicase ded1 protein n=5 Tax=Botryosphaeriaceae TaxID=45131 RepID=R1GNS6_BOTPV	No hit	0	0	1	No hit	SP(Sec/SPI)	gnl|TC-DB|O00571|1.I.1.1.3 ATP-dependent RNA helicase DDX3X OS=Homo sapiens GN=DDX3X PE=1 SV=3	80.8081
AF_DN56311_c0_g1	0	0	4.00277	Ascomycota	NA	UniRef90_M7SJX0 Uncharacterized protein n=1 Tax=Eutypa lata (strain UCR-EL1) TaxID=1287681 RepID=M7SJX0_EUTLA	No hit	0	0	1	No hit	0
AF_DN67531_c0_g1	0	0	4.00003	Basidiomycota	NA	UniRef90_G4TD10 Uncharacterized protein n=1 Tax=Serendipita indica (strain DSM 11827) TaxID=1109443 RepID=G4TD10_SERID	No hit	0	0	1	No hit	0
AF_DN483_c0_g1	0	0	3.99903	Basidiomycota	NA	UniRef90_A0A0C3CCB6 Uncharacterized protein n=1 Tax=Hebeloma cylindrosporum h7 TaxID=686832 RepID=A0A0C3CCB6_HEBCY	No hit	0	0	1	No hit	0
AF_DN10772_c0_g1	0	0	3.98479	Basidiomycota	Manganese superoxide dismutase (Fragment)	UniRef90_A8NCK1 Superoxide dismutase n=1 Tax=Coprinopsis cinerea (strain Okayama-7 / 130 / ATCC MYA-4618 / FGSC 9003) TaxID=240176 RepID=A8NCK1_COPC7	No hit	0	0	1	No hit	0
AF_DN15162_c0_g1	0	0	3.98111	Ascomycota	Acyl-CoA desaturase	UniRef90_A0A0D2EZK2 Acyl-CoA desaturase n=2 Tax=Exophiala TaxID=5583 RepID=A0A0D2EZK2_9EURO	No hit	0	0	1	No hit	0
AF_DN24915_c0_g1	0	0	3.97803	Basidiomycota	Translation elongation factor 3 (Fragment)	UniRef90_K4IPC8 Translation elongation factor 3 (Fragment) n=1 Tax=Amanita strobiliformis TaxID=67730 RepID=K4IPC8_9AGAR	No hit	0	0	1	No hit	0
AF_DN102877_c0_g1	0	0	3.97739	Ascomycota	WW domain-containing protein WWM1	UniRef90_A0A2H3IS08 WW/Rsp5/WWP n=1 Tax=Penicillium occitanis TaxID=290292 RepID=A0A2H3IS08_9EURO	No hit	0	0	1	No hit	0
AF_DN6330_c0_g1	0	0	3.97299	Basidiomycota	p-loop containing nucleoside triphosphate hydrolase protein	UniRef90_A0A165PJL7 Uncharacterized protein n=1 Tax=Exidia glandulosa HHB12029 TaxID=1314781 RepID=A0A165PJL7_EXIGL	Hsp100	0	0	1	GH6	0
AF_DN27642_c0_g1	0	0	3.96952	Basidiomycota	NA	UniRef90_A0A166NDQ4 MFS general substrate transporter (Fragment) n=1 Tax=Exidia glandulosa HHB12029 TaxID=1314781 RepID=A0A166NDQ4_EXIGL	No hit	0	0	1	No hit	0
AF_DN7224_c0_g1	0	0	3.96836	Basidiomycota	RNA-binding protein	UniRef90_K5XAY4 Uncharacterized protein n=2 Tax=Agaricus bisporus TaxID=5341 RepID=K5XAY4_AGABU	No hit	0	0	1	No hit	0
AF_DN65261_c0_g1	0	0	3.9672	No hit found	NA	No hits	No hit	0	0	1	No hit	0
AF_DN36560_c0_g1	0	0	3.96378	Ascomycota	Metal homeostatis protein bsd2	UniRef90_A0A225AZI4 Uncharacterized protein n=1 Tax=Talaromyces atroroseus TaxID=1441469 RepID=A0A225AZI4_9EURO	No hit	0	0	1	No hit	0
AF_DN88230_c0_g1	0	0	3.95325	Ascomycota	1 concanamycin induced protein c	UniRef90_A0A225AVY1 Uncharacterized protein n=1 Tax=Talaromyces atroroseus TaxID=1441469 RepID=A0A225AVY1_9EURO	No hit	0	0	1	No hit	0
AF_DN94322_c0_g1	0	0	3.95283	Ascomycota	NA	UniRef90_A0A1Y1ZTE4 Cross-pathway control protein 1 n=1 Tax=Clohesyomyces aquaticus TaxID=1231657 RepID=A0A1Y1ZTE4_9PLEO	No hit	0	0	1	No hit	0
AF_DN78625_c0_g1	0	0	3.94918	Basidiomycota	Carbohydrate-binding domain protein	UniRef90_J0LEL7 Uncharacterized protein n=1 Tax=Auricularia subglabra (strain TFB-10046 / SS5) TaxID=717982 RepID=J0LEL7_AURST	No hit	0	0	1	No hit	SP(Sec/SPI)
AF_DN40328_c0_g1	0	0	3.94612	Ascomycota	Tetracycline resistance protein TetB/drug resistance transporter	UniRef90_A0A178EC64 MFS transporter n=1 Tax=Pyrenochaeta sp. DS3sAY3a TaxID=765867 RepID=A0A178EC64_9PLEO	No hit	0	0	1	No hit	0	gnl|TC-DB|A4ZGP3|2.A.1.3.73 Major facilitator superfamily transporter OS=Zymoseptoria tritici GN=Mfs1 PE=4 SV=1	76.8802
AF_DN31739_c1_g1	0	0	3.94524	Ascomycota	Transcriptional regulator RPN4	UniRef90_W2RXL5 Uncharacterized protein n=1 Tax=Cyphellophora europaea CBS 101466 TaxID=1220924 RepID=W2RXL5_9EURO	No hit	0	0	1	No hit	0
AF_DN57707_c0_g1	0	0	3.92917	Basidiomycota	NAD-binding protein	UniRef90_A0A165I0A1 NAD(P)-binding protein (Fragment) n=2 Tax=Exidia glandulosa HHB12029 TaxID=1314781 RepID=A0A165I0A1_EXIGL	No hit	0	0	1	No hit	0
AF_DN104361_c0_g1	0	0	3.92603	Ascomycota	Clock-controlled protein 6	UniRef90_A0A179F8X8 Mmc protein n=2 Tax=Clavicipitaceae TaxID=34397 RepID=A0A179F8X8_METCM	No hit	0	0	1	No hit	SP(Sec/SPI)
AF_DN9065_c0_g1	0	0.025108	3.92528	Ascomycota	Casein kinase I isoform delta, variant 6	UniRef90_R0JXL1 Uncharacterized protein n=1 Tax=Setosphaeria turcica (strain 28A) TaxID=671987 RepID=R0JXL1_SETT2	No hit	0	0.0155515	0.999879	No hit	0
AF_DN28151_c0_g1	0	0	3.91633	Ascomycota	NA	UniRef90_B8LTJ2 Phosphoenolpyruvate carboxykinase AcuF n=4 Tax=Eurotiales TaxID=5042 RepID=B8LTJ2_TALSN	No hit	0	0	1	No hit	0
AF_DN85793_c0_g1	0	0	3.91447	Basidiomycota	Ubiquitin-conjugating enzyme	UniRef90_W3VK78 Uncharacterized protein n=1 Tax=Pseudozyma aphidis (strain ATCC 32657 / CBS 517.83 / DSM 70725 / JCM 10318/ NBRC 10182 / NRRL Y-7954 / St-0401) TaxID=1391700 RepID=W3VK78_PSEA5	No hit	0	0	1	No hit	0	gnl|TC-DB|P62837|3.A.20.1.1 Ubiquitin-conjugating enzyme E2 D2 OS=Homo sapiens GN=UBE2D2 PE=1 SV=1	91.7355
AF_DN13183_c0_g1	0	0.010574	3.90638	No hit found	NA	UniRef90_A0A165CW54 Uncharacterized protein n=1 Tax=Exidia glandulosa HHB12029 TaxID=1314781 RepID=A0A165CW54_EXIGL	No hit	0	0.006613	0.999978	No hit	0
AF_DN32446_c0_g1	0	0	3.89933	Ascomycota	NA	UniRef90_A0A1Y1ZPX6 Uncharacterized protein n=1 Tax=Clohesyomyces aquaticus TaxID=1231657 RepID=A0A1Y1ZPX6_9PLEO	No hit	0	0	1	No hit	0
AF_DN102282_c0_g1	0	0	3.89853	Basidiomycota	NA	UniRef90_V2X1U1 Uncharacterized protein n=2 Tax=Moniliophthora roreri TaxID=221103 RepID=V2X1U1_MONRO	No hit	0	0	1	No hit	0
AF_DN26624_c0_g1	0	0	3.89739	Ascomycota	NA	No hits	No hit	0	0	1	No hit	0
AF_DN75219_c0_g1	0	0	3.89596	Ascomycota	NA	No hits	No hit	0	0	1	No hit	0
AF_DN58036_c0_g1	0	0	3.89414	No hit found	Conidiation-specific protein con-10	No hits	No hit	0	0	1	No hit	0
AF_DN606_c0_g1	0	0	3.89028	Ascomycota	NA	UniRef90_A0A1Q5QB27 Catalase n=1 Tax=Talaromyces atroroseus TaxID=1441469 RepID=A0A1Q5QB27_9EURO	No hit	0	0	1	No hit	0
AF_DN96884_c0_g1	0	0	3.88899	Basidiomycota	Small subunit ribosomal protein S15	UniRef90_K5XF45 Uncharacterized protein (Fragment) n=2 Tax=Agaricus bisporus TaxID=5341 RepID=K5XF45_AGABU	No hit	0	0	1	No hit	0
AF_DN27828_c0_g1	0	0.0330173	3.88746	Ascomycota	CipC1 protein, concanamycin induced protein C	UniRef90_A0A0H2RTS9 Putative phosphoglycerate mutase family protein n=1 Tax=Schizopora paradoxa TaxID=27342 RepID=A0A0H2RTS9_9HOMO	No hit	0	0.0204687	0.99979	No hit	0
AF_DN82601_c0_g1	0	0	3.87861	Basidiomycota	NA	UniRef90_A0A067TSF0 Uncharacterized protein n=1 Tax=Galerina marginata (strain CBS 339.88) TaxID=685588 RepID=A0A067TSF0_GALM3	No hit	0	0	1	No hit	0
AF_DN62665_c0_g1	0	0.0410357	3.87693	No hit found	NA	No hits	No hit	0	0.0253725	0.999678	No hit	0
AF_DN6408_c0_g1	0.0116576	0.00962767	3.8719	Ascomycota	Pathogenesis associated protein Cap20	UniRef90_W2RYE1 Uncharacterized protein n=1 Tax=Cyphellophora europaea CBS 101466 TaxID=1220924 RepID=W2RYE1_9EURO	No hit	0.0073191	0.0060507	0.999955	No hit	0
AF_DN73303_c0_g1	0	0	3.85946	Ascomycota	NA	UniRef90_A0A1Y2A3M9 Uncharacterized protein n=1 Tax=Clohesyomyces aquaticus TaxID=1231657 RepID=A0A1Y2A3M9_9PLEO	No hit	0	0	1	No hit	0
AF_DN25466_c0_g1	0.0157172	0.0133665	3.85945	Ascomycota	Clock-controlled protein 6	UniRef90_R7YUN5 Uncharacterized protein n=1 Tax=Coniosporium apollinis (strain CBS 100218) TaxID=1168221 RepID=R7YUN5_CONA1	No hit	0.00986362	0.00839816	0.999916	No hit	SP(Sec/SPI)
AF_DN58505_c0_g1	0	0	3.85526	Ascomycota	Transaldolase (Fragment)	UniRef90_A0A163CE82 Transaldolase n=2 Tax=Didymellaceae TaxID=683158 RepID=A0A163CE82_DIDRA	No hit	0	0	1	No hit	0
AF_DN43675_c0_g1	0	0	3.85525	Basidiomycota	NA	UniRef90_A0A165H5V2 Uncharacterized protein n=1 Tax=Exidia glandulosa HHB12029 TaxID=1314781 RepID=A0A165H5V2_EXIGL	No hit	0	0	1	No hit	SP(Sec/SPI)
AF_DN35048_c0_g1	0	0	3.85322	Ascomycota	Response to stress	UniRef90_A0A1Y1ZM14 HSP20-like chaperone n=1 Tax=Clohesyomyces aquaticus TaxID=1231657 RepID=A0A1Y1ZM14_9PLEO	ACD	0	0	1	No hit	0
AF_DN12553_c0_g1	0	0.00542253	3.84542	Ascomycota	NA	UniRef90_A0A0G2GWR8 Putative bzip transcription factor n=1 Tax=Phaeomoniella chlamydospora TaxID=158046 RepID=A0A0G2GWR8_9EURO	No hit	0	0.00342696	0.999994	No hit	0
AF_DN17671_c0_g1	0	0	3.83951	Ascomycota	Heat shock protein 42	UniRef90_Q0V0I8 Uncharacterized protein n=1 Tax=Phaeosphaeria nodorum (strain SN15 / ATCC MYA-4574 / FGSC 10173) TaxID=321614 RepID=Q0V0I8_PHANO	ACD	0	0	1	No hit	0
AF_DN42593_c0_g1	0	0	3.83706	Basidiomycota	NA	UniRef90_A0A165NGC8 Gpr1 family protein n=1 Tax=Exidia glandulosa HHB12029 TaxID=1314781 RepID=A0A165NGC8_EXIGL	No hit	0	0	1	No hit	0
AF_DN74548_c0_g1	0	0	3.83399	Ascomycota	Vegetative cell wall protein gp1	UniRef90_A0A225AKD6 Uncharacterized protein n=1 Tax=Talaromyces atroroseus TaxID=1441469 RepID=A0A225AKD6_9EURO	No hit	0	0	1	No hit	0
AF_DN9098_c0_g1	0	0	3.8212	Basidiomycota	NA	UniRef90_A0A0H2S5A8 Uncharacterized protein n=1 Tax=Schizopora paradoxa TaxID=27342 RepID=A0A0H2S5A8_9HOMO	No hit	0	0	1	No hit	0
AF_DN44538_c1_g1	0	0	3.81986	Ascomycota	NA	UniRef90_A0A072PA86 Uncharacterized protein n=1 Tax=Exophiala aquamarina CBS 119918 TaxID=1182545 RepID=A0A072PA86_9EURO	No hit	0	0	1	No hit	0
AF_DN54501_c0_g2	0	0.0390575	3.81886	Ascomycota	Heat shock protein 42	UniRef90_Q0V0I8 Uncharacterized protein n=1 Tax=Phaeosphaeria nodorum (strain SN15 / ATCC MYA-4574 / FGSC 10173) TaxID=321614 RepID=Q0V0I8_PHANO	ACD	0	0.0243572	0.999703	No hit	0
AF_DN43821_c1_g1	0	0	3.81618	Ascomycota	NA	UniRef90_A0A1Y1ZKU7 Uncharacterized protein n=1 Tax=Clohesyomyces aquaticus TaxID=1231657 RepID=A0A1Y1ZKU7_9PLEO	No hit	0	0	1	No hit	0
AF_DN75293_c0_g1	0	0	3.8161	Ascomycota	NA	No hits	No hit	0	0	1	No hit	0
AF_DN19361_c0_g1	0	0	3.81043	Ascomycota	Putative phosphoglycerate mutase	UniRef90_A0A0G2GAT2 Putative phosphoglycerate mutase n=1 Tax=Phaeomoniella chlamydospora TaxID=158046 RepID=A0A0G2GAT2_9EURO	No hit	0	0	1	No hit	0
AF_DN44352_c0_g1	0	0	3.80993	No hit found	NA	UniRef90_A0A1Q1N6L9 Replicase n=1 Tax=Agaricus bisporus virus 6 TaxID=1945750 RepID=A0A1Q1N6L9_9VIRU	No hit	0	0	1	No hit	0
AF_DN55553_c0_g1	0	0	3.80232	Ascomycota	Acyl-CoA desaturase	UniRef90_A0A1Y1ZGW4 Acyl-CoA desaturase n=1 Tax=Clohesyomyces aquaticus TaxID=1231657 RepID=A0A1Y1ZGW4_9PLEO	No hit	0	0	1	No hit	0
AF_DN69492_c0_g1	0	0	3.79788	Basidiomycota	NA	UniRef90_A0A067SAB4 Uncharacterized protein n=1 Tax=Galerina marginata (strain CBS 339.88) TaxID=685588 RepID=A0A067SAB4_GALM3	No hit	0	0	1	No hit	0
AF_DN59404_c0_g1	0	0	3.7933	Ascomycota	NA	UniRef90_A0A163KSC9 Uncharacterized protein n=1 Tax=Didymella rabiei TaxID=5454 RepID=A0A163KSC9_DIDRA	No hit	0	0	1	No hit	0
AF_DN67165_c0_g1	0	0	3.79188	Ascomycota	NA	UniRef90_A0A1Y1Z1V1 Uncharacterized protein n=1 Tax=Clohesyomyces aquaticus TaxID=1231657 RepID=A0A1Y1Z1V1_9PLEO	No hit	0	0	1	No hit	0
AF_DN78379_c0_g1	0	0	3.7898	No hit found	NA	UniRef90_UPI000440848F hypothetical protein n=1 Tax=Fomitiporia mediterranea (strain MF3/22) TaxID=694068 RepID=UPI000440848F	No hit	0	0	1	No hit	0
AF_DN32449_c0_g1	0	0.0173171	3.78721	Ascomycota	Murein transglycosylase	UniRef90_A0A1Y1YFY6 Glycosyl hydrolases family 16-domain-containing protein n=1 Tax=Clohesyomyces aquaticus TaxID=1231657 RepID=A0A1Y1YFY6_9PLEO	No hit	0	0.0109632	0.99994	GH16(75-237)	0
AF_DN83539_c0_g1	0	0	3.7836	Basidiomycota	Eukaryotic translation initiation factor 5A	UniRef90_UPI000455D8FB initiation factor 5a n=1 Tax=Coniophora puteana (strain RWD-64-598) TaxID=741705 RepID=UPI000455D8FB	No hit	0	0	1	No hit	0	gnl|TC-DB|P63241|1.I.1.1.3 Eukaryotic translation initiation factor 5A-1 OS=Homo sapiens GN=EIF5A PE=1 SV=2	76.3158
AF_DN92814_c0_g1	0	0	3.78271	Ascomycota	NA	UniRef90_A0A225A9B2 Uncharacterized protein n=1 Tax=Talaromyces atroroseus TaxID=1441469 RepID=A0A225A9B2_9EURO	No hit	0	0	1	No hit	0
AF_DN42166_c2_g1	0	0	3.78205	Basidiomycota	NA	No hits	No hit	0	0	1	No hit	0
AF_DN77742_c0_g1	0	0	3.78043	Ascomycota	NA	UniRef90_A0A225B0E4 Uncharacterized protein n=1 Tax=Talaromyces atroroseus TaxID=1441469 RepID=A0A225B0E4_9EURO	No hit	0	0	1	No hit	0
AF_DN3634_c0_g1	0	0	3.77995	Ascomycota	NA	UniRef90_A0A225AD81 Uncharacterized protein n=1 Tax=Talaromyces atroroseus TaxID=1441469 RepID=A0A225AD81_9EURO	No hit	0	0	1	No hit	0
AF_DN55835_c0_g1	0.0110872	0	3.77981	Basidiomycota	Laminarinase	UniRef90_A0A165F213 Uncharacterized protein n=1 Tax=Exidia glandulosa HHB12029 TaxID=1314781 RepID=A0A165F213_EXIGL	No hit	0.00704801	0	0.999975	GH16(53)	0
AF_DN105416_c0_g1	0	0	3.77313	Ascomycota	NA	UniRef90_A0A0B7JZK8 Uncharacterized protein n=1 Tax=Bionectria ochroleuca TaxID=29856 RepID=A0A0B7JZK8_BIOOC	No hit	0	0	1	No hit	0
AF_DN38719_c1_g1	0.0372403	0	3.77272	Ascomycota	Large subunit ribosomal protein L10e	UniRef90_F8QWZ3 60S ribosomal protein L10-B n=1 Tax=Endocarpon pusillum TaxID=364733 RepID=F8QWZ3_9EURO	No hit	0.0233881	0	0.999726	No hit	0
AF_DN45311_c0_g1	0	0	3.76788	Basidiomycota	NA	UniRef90_A0A067U3I9 Uncharacterized protein n=1 Tax=Galerina marginata (strain CBS 339.88) TaxID=685588 RepID=A0A067U3I9_GALM3	No hit	0	0	1	No hit	0
AF_DN102373_c0_g1	0	0.0166072	3.76723	Basidiomycota	NA	UniRef90_A0A0H2RKG7 Uncharacterized protein n=1 Tax=Schizopora paradoxa TaxID=27342 RepID=A0A0H2RKG7_9HOMO	No hit	0	0.0105457	0.999944	No hit	0
AF_DN59189_c0_g1	0	0	3.76216	Basidiomycota	NA	UniRef90_A0A0H2RU64 HSP20-like chaperone (Fragment) n=1 Tax=Schizopora paradoxa TaxID=27342 RepID=A0A0H2RU64_9HOMO	ACD	0	0	1	No hit	0
AF_DN29093_c0_g1	0	0.0132645	3.76067	Basidiomycota	Glycopeptide	UniRef90_A0A067SYA9 Uncharacterized protein n=1 Tax=Galerina marginata (strain CBS 339.88) TaxID=685588 RepID=A0A067SYA9_GALM3	No hit	0	0.00844458	0.999964	No hit	SP(Sec/SPI)
AF_DN11193_c0_g1	0	0	3.75791	Basidiomycota	NA	No hits	No hit	0	0	1	No hit	0
AF_DN11183_c0_g1	0	0.046781	3.75791	Ascomycota	NA	UniRef90_H6C2Q6 Elongation factor EF-3 n=16 Tax=Herpotrichiellaceae TaxID=43219 RepID=H6C2Q6_EXODN	No hit	0	0.0292985	0.999571	No hit	0
AF_DN37710_c0_g1	0	0	3.75721	Ascomycota	NA	UniRef90_A0A177CCF6 Uncharacterized protein (Fragment) n=1 Tax=Paraphaeosphaeria sporulosa TaxID=1460663 RepID=A0A177CCF6_9PLEO	No hit	0	0	1	No hit	0
AF_DN74986_c0_g1	0	0.0110167	3.75086	Ascomycota	Hsp90 associated co-chaperone	UniRef90_A0A0D2IEY4 Rhinocladiella mackenziei CBS 650.93 unplaced genomic scaffold supercont1.4, whole genome shotgun sequence n=1 Tax=Rhinocladiella mackenziei CBS 650.93 TaxID=1442369 RepID=A0A0D2IEY4_9EURO	No hit	0	0.00703072	0.999975	No hit	0
AF_DN16001_c0_g1	0	0	3.74589	Basidiomycota	Vacuolar aspartic protease	UniRef90_A0A0H2S1N0 Aspartic peptidase A1 (Fragment) n=1 Tax=Schizopora paradoxa TaxID=27342 RepID=A0A0H2S1N0_9HOMO	No hit	0	0	1	No hit	0
AF_DN95475_c0_g1	0	0	3.72972	Basidiomycota	NA	No hits	No hit	0	0	1	No hit	0
AF_DN108625_c0_g1	0	0	3.72573	Ascomycota	NA	UniRef90_A0A225BAS2 Uncharacterized protein n=1 Tax=Talaromyces atroroseus TaxID=1441469 RepID=A0A225BAS2_9EURO	No hit	0	0	1	No hit	0
AF_DN32397_c0_g1	0	0	3.7193	No hit found	NA	No hits	No hit	0	0	1	No hit	SP(Sec/SPI)
AF_DN103135_c0_g1	0	0.00712453	3.71635	Ascomycota	Nucleosome assembly	UniRef90_W2RUL6 Uncharacterized protein n=1 Tax=Cyphellophora europaea CBS 101466 TaxID=1220924 RepID=W2RUL6_9EURO	No hit	0	0.00457707	0.99999	No hit	0
AF_DN83149_c0_g1	0	0	3.71451	Ascomycota	Cytochrome c peroxidase, mitochondrial	UniRef90_A0A225A7C7 Peroxidase n=1 Tax=Talaromyces atroroseus TaxID=1441469 RepID=A0A225A7C7_9EURO	No hit	0	0	1	AA2(103-347)	0
AF_DN71596_c0_g1	0	0	3.71374	Ascomycota	NA	UniRef90_A0A1Y2A0Q9 Uncharacterized protein n=1 Tax=Clohesyomyces aquaticus TaxID=1231657 RepID=A0A1Y2A0Q9_9PLEO	No hit	0	0	1	No hit	0
AF_DN43292_c0_g1	0	0	3.71063	Basidiomycota	NA	UniRef90_A0A067TJS0 Uncharacterized protein n=1 Tax=Galerina marginata (strain CBS 339.88) TaxID=685588 RepID=A0A067TJS0_GALM3	No hit	0	0	1	No hit	0
AF_DN32735_c0_g1	0	0	3.71005	No hit found	NA	No hits	No hit	0	0	1	No hit	0
AF_DN77804_c0_g1	0	0	3.7065	Basidiomycota	NA	UniRef90_A0A0H2S9T0 Uncharacterized protein n=1 Tax=Schizopora paradoxa TaxID=27342 RepID=A0A0H2S9T0_9HOMO	No hit	0	0	1	No hit	0
AF_DN54862_c0_g1	0	0.340031	3.7048	Ascomycota	40s ribosomal protein s9	UniRef90_E3S128 Uncharacterized protein n=2 Tax=Pyrenophora TaxID=5027 RepID=E3S128_PYRTT	No hit	0	0.185718	0.982603	No hit	0
AF_DN26566_c0_g1	0	0	3.69294	Basidiomycota	Alginate lyase	UniRef90_A0A067TFL5 Uncharacterized protein n=1 Tax=Galerina marginata (strain CBS 339.88) TaxID=685588 RepID=A0A067TFL5_GALM3	No hit	0	0	1	PL14_4(3-208)	0
AF_DN65425_c0_g1	0	0	3.69191	Basidiomycota	ATP synthase subunit beta (Fragment)	UniRef90_A0A0D0A7V3 Unplaced genomic scaffold CY34scaffold_303, whole genome shotgun sequence n=1 Tax=Suillus luteus UH-Slu-Lm8-n1 TaxID=930992 RepID=A0A0D0A7V3_9HOMO	No hit	0	0	1	No hit	0	gnl|TC-DB|A1B8P0|3.A.2.1.7 ATP synthase subunit beta OS=Paracoccus denitrificans (strain Pd 1222) GN=atpD PE=3 SV=1	85.2113
AF_DN41115_c0_g1	0	0	3.69103	Ascomycota	NA	UniRef90_A0A0D2BBY2 Uncharacterized protein n=1 Tax=Verruconis gallopava TaxID=253628 RepID=A0A0D2BBY2_9PEZI	No hit	0	0	1	No hit	0
AF_DN73450_c0_g1	0	0	3.68924	Ascomycota	NA	UniRef90_A0A178ELX9 MFS general substrate transporter n=1 Tax=Pyrenochaeta sp. DS3sAY3a TaxID=765867 RepID=A0A178ELX9_9PLEO	No hit	0	0	1	No hit	0
AF_DN23232_c0_g1	0	0.073932	3.6836	Ascomycota	NA	UniRef90_A0A093V7H3 14-3-3 protein like n=4 Tax=Eurotiales TaxID=5042 RepID=A0A093V7H3_TALMA	No hit	0	0.0461448	0.998935	No hit	0	gnl|TC-DB|P48349|8.A.98.1.8 14-3-3-like protein GF14 lambda OS=Arabidopsis thaliana GN=GRF6 PE=1 SV=1	85.9375
AF_DN29003_c0_g1	0	0.00883227	3.68174	Basidiomycota	Dye-decolorizing peroxidase	UniRef90_A0A0H2RIX3 Dyp-type peroxidase n=1 Tax=Schizopora paradoxa TaxID=27342 RepID=A0A0H2RIX3_9HOMO	No hit	0	0.00569639	0.999984	No hit	0
AF_DN31952_c0_g1	0	0	3.67933	Ascomycota	NA	No hits	No hit	0	0	1	No hit	0
AF_DN13598_c0_g1	0	0	3.66878	Basidiomycota	NA	UniRef90_A0A0H2RW65 Uncharacterized protein n=1 Tax=Schizopora paradoxa TaxID=27342 RepID=A0A0H2RW65_9HOMO	No hit	0	0	1	No hit	0
AF_DN76864_c0_g1	0	0	3.66812	No hit found	NA	UniRef90_A0A0H2RGE3 Uncharacterized protein n=1 Tax=Schizopora paradoxa TaxID=27342 RepID=A0A0H2RGE3_9HOMO	No hit	0	0	1	No hit	0
AF_DN59659_c0_g1	0	0.0226027	3.66473	Ascomycota	Zinc ion binding	UniRef90_A0A178ABP3 Uncharacterized protein n=3 Tax=Pleosporales TaxID=92860 RepID=A0A178ABP3_9PLEO	No hit	0	0.0145119	0.999895	No hit	0
AF_DN80926_c0_g1	0	0	3.66448	Ascomycota	NA	UniRef90_A0A093UZM4 Single-stranded TG1-3 DNA-binding protein n=5 Tax=Eurotiales TaxID=5042 RepID=A0A093UZM4_TALMA	No hit	0	0	1	No hit	0
AF_DN36490_c0_g1	0	0	3.66342	Basidiomycota	NA	UniRef90_A0A0C3AXE5 Uncharacterized protein n=1 Tax=Piloderma croceum F 1598 TaxID=765440 RepID=A0A0C3AXE5_9HOMO	No hit	0	0	1	No hit	0
AF_DN3927_c0_g1	0	0	3.66076	Ascomycota	DDHD domain-containing protein	UniRef90_A0A0D1YEX1 Uncharacterized protein n=1 Tax=Verruconis gallopava TaxID=253628 RepID=A0A0D1YEX1_9PEZI	No hit	0	0	1	No hit	0
AF_DN25149_c0_g1	0	0	3.6588	Ascomycota	NA	UniRef90_A0A194VIP4 Uncharacterized protein n=1 Tax=Valsa mali TaxID=105487 RepID=A0A194VIP4_9PEZI	No hit	0	0	1	No hit	0
AF_DN16868_c0_g1	0	0.118628	3.65362	Ascomycota	NA	UniRef90_A0A072P9I2 Uncharacterized protein n=1 Tax=Exophiala aquamarina CBS 119918 TaxID=1182545 RepID=A0A072P9I2_9EURO	ACD	0	0.0727124	0.997353	No hit	0
AF_DN17735_c0_g1	0	0	3.65275	Ascomycota	NA	UniRef90_K2RCL6 Uncharacterized protein n=1 Tax=Macrophomina phaseolina (strain MS6) TaxID=1126212 RepID=K2RCL6_MACPH	No hit	0	0	1	No hit	0
AF_DN14221_c0_g1	0	0.022147	3.65067	Ascomycota	NA	UniRef90_R7YUK9 Uncharacterized protein n=1 Tax=Coniosporium apollinis (strain CBS 100218) TaxID=1168221 RepID=R7YUK9_CONA1	No hit	0	0.0142504	0.999898	No hit	0
AF_DN29168_c0_g2	0	0	3.6492	Basidiomycota	NA	UniRef90_A0A0C3MM95 Uncharacterized protein n=1 Tax=Tulasnella calospora MUT 4182 TaxID=1051891 RepID=A0A0C3MM95_9HOMO	Hsp90	0	0	1	No hit	0
AF_DN108195_c0_g1	0	0	3.64841	Ascomycota	NA	UniRef90_B8M8Q3 RNA helicase (Dbp), putative n=5 Tax=Talaromyces TaxID=5094 RepID=B8M8Q3_TALSN	No hit	0	0	1	No hit	0
AF_DN77312_c0_g1	0	0	3.64764	Basidiomycota	NA	UniRef90_A0A0H2RHN7 Uncharacterized protein n=1 Tax=Schizopora paradoxa TaxID=27342 RepID=A0A0H2RHN7_9HOMO	No hit	0	0	1	No hit	0
AF_DN13965_c0_g1	0	0	3.64683	Basidiomycota	NA	UniRef90_A0A165MF47 Uncharacterized protein n=1 Tax=Exidia glandulosa HHB12029 TaxID=1314781 RepID=A0A165MF47_EXIGL	No hit	0	0	1	No hit	0
AF_DN5177_c0_g1	0	0	3.6429	No hit found	NA	No hits	No hit	0	0	1	No hit	0
AF_DN89861_c0_g1	0	0	3.64091	Basidiomycota	1 concanamycin induced protein c	UniRef90_A0A165QSP8 Uncharacterized protein n=1 Tax=Exidia glandulosa HHB12029 TaxID=1314781 RepID=A0A165QSP8_EXIGL	No hit	0	0	1	No hit	0
AF_DN56431_c0_g1	0	0	3.63936	Ascomycota	NA	UniRef90_B8M7N1 Meiotic sister chromatid recombination protein Ish1/Msc1, putative n=1 Tax=Talaromyces stipitatus (strain ATCC 10500 / CBS 375.48 / QM 6759 / NRRL 1006) TaxID=441959 RepID=B8M7N1_TALSN	No hit	0	0	1	No hit	0
AF_DN792_c0_g1	0	0.0143314	3.62834	Ascomycota	NA	UniRef90_A0A1Y1ZKU7 Uncharacterized protein n=1 Tax=Clohesyomyces aquaticus TaxID=1231657 RepID=A0A1Y1ZKU7_9PLEO	No hit	0	0.00928669	0.999957	No hit	0
AF_DN12300_c0_g1	0	0	3.62802	Ascomycota	NA	UniRef90_A0A225A948 Uncharacterized protein n=1 Tax=Talaromyces atroroseus TaxID=1441469 RepID=A0A225A948_9EURO	No hit	0	0	1	No hit	0
AF_DN7569_c0_g1	0	0.0327963	3.61954	Ascomycota	NA	No hits	No hit	0	0.0210827	0.999778	No hit	0
AF_DN65180_c0_g1	2.19337	1.04709	3.61927	No hit found	NA	No hits	No hit	0.566347	0.349454	0.746414	No hit	0
AF_DN78280_c0_g1	0	0	3.61685	Ascomycota	NA	No hits	No hit	0	0	1	No hit	0
AF_DN92232_c0_g1	0	0.0124251	3.61526	No hit found	NA	UniRef90_Q0UZ27 Uncharacterized protein n=1 Tax=Phaeosphaeria nodorum (strain SN15 / ATCC MYA-4574 / FGSC 10173) TaxID=321614 RepID=Q0UZ27_PHANO	No hit	0	0.00807404	0.999967	No hit	SP(Sec/SPI)
AF_DN55107_c0_g1	0.048687	0	3.60868	Ascomycota	NA	No hits	No hit	0.031098	0	0.999516	No hit	0
AF_DN14321_c0_g1	0	0	3.60357	Basidiomycota	dnaJ homolog subfamily A member 4 isoform X2	UniRef90_A0A0H2RRD7 Uncharacterized protein n=1 Tax=Schizopora paradoxa TaxID=27342 RepID=A0A0H2RRD7_9HOMO	DnaJ	0	0	1	No hit	0
AF_DN40819_c0_g1	0	0.0216142	3.60176	Ascomycota	NA	No hits	No hit	0	0.0140077	0.999902	No hit	0
AF_DN74881_c0_g1	0	0	3.59892	Ascomycota	Oxalate decarboxylase oxidase	UniRef90_A0A1Y1Y0Y1 RmlC-like cupin domain-containing protein n=1 Tax=Clohesyomyces aquaticus TaxID=1231657 RepID=A0A1Y1Y0Y1_9PLEO	No hit	0	0	1	No hit	SP(Sec/SPI)
AF_DN96872_c0_g1	0	0.0311015	3.59817	Basidiomycota	NA	UniRef90_A0A1M2W5T1 Uncharacterized protein n=1 Tax=Trametes pubescens TaxID=154538 RepID=A0A1M2W5T1_TRAPU	No hit	0	0.020071	0.999799	No hit	0
AF_DN33235_c0_g1	0	0	3.59777	Ascomycota	NA	No hits	No hit	0	0	1	No hit	0
AF_DN16142_c0_g1	0	0	3.59702	No hit found	NA	UniRef90_A0A1Q1N6L2 Replicase n=1 Tax=Agaricus bisporus virus 5 TaxID=1945749 RepID=A0A1Q1N6L2_9VIRU	No hit	0	0	1	No hit	0
AF_DN27491_c0_g1	0	0	3.59431	Ascomycota	NA	UniRef90_A0A175VV99 30 kDa heat shock protein n=1 Tax=Madurella mycetomatis TaxID=100816 RepID=A0A175VV99_9PEZI	ACD	0	0	1	No hit	0
AF_DN88680_c0_g1	0	0	3.59287	Ascomycota	NA	UniRef90_A0A177CUE3 Uncharacterized protein n=1 Tax=Paraphaeosphaeria sporulosa TaxID=1460663 RepID=A0A177CUE3_9PLEO	No hit	0	0	1	No hit	0
AF_DN38094_c0_g1	0	0	3.59017	Ascomycota	Heat shock protein (Eurofung)	UniRef90_B8M2F7 Hsp70 chaperone Hsp88 n=4 Tax=Eurotiales TaxID=5042 RepID=B8M2F7_TALSN	Hsp70	0	0	1	No hit	0
AF_DN55301_c0_g1	0	0	3.58911	Ascomycota	Murein transglycosylase	UniRef90_W2RQ13 Uncharacterized protein n=1 Tax=Cyphellophora europaea CBS 101466 TaxID=1220924 RepID=W2RQ13_9EURO	No hit	0	0	1	GH17(8-215)	0
AF_DN60369_c0_g1	0	0	3.58787	Ascomycota	NA	UniRef90_R7YP62 Elongation factor 3 n=1 Tax=Coniosporium apollinis (strain CBS 100218) TaxID=1168221 RepID=R7YP62_CONA1	No hit	0	0	1	No hit	0
AF_DN17581_c0_g1	0	0	3.58507	Basidiomycota	Heat shock protein 70	UniRef90_A0A067SXG5 Uncharacterized protein n=1 Tax=Galerina marginata (strain CBS 339.88) TaxID=685588 RepID=A0A067SXG5_GALM3	Hsp70	0	0	1	No hit	0
AF_DN33367_c0_g1	0	0	3.58471	Ascomycota	NA	UniRef90_A0A1Y1NCW5 Uncharacterized protein (Fragment) n=1 Tax=Photinus pyralis TaxID=7054 RepID=A0A1Y1NCW5_PHOPY	No hit	0	0	1	No hit	0
AF_DN42545_c0_g3	0	0	3.58257	Basidiomycota	NA	UniRef90_E2LS30 Uncharacterized protein (Fragment) n=1 Tax=Moniliophthora perniciosa (strain FA553 / isolate CP02) TaxID=554373 RepID=E2LS30_MONPE	No hit	0	0	1	No hit	0
AF_DN77666_c0_g1	0	0	3.5782	Basidiomycota	NA	UniRef90_A0A2H4Z9U8 Aldehyde dehydrogenase 2B2 n=1 Tax=Syntrichia caninervis TaxID=200751 RepID=A0A2H4Z9U8_9BRYO	No hit	0	0	1	No hit	0
AF_DN13050_c0_g1	0	0.0103195	3.5772	Ascomycota	Cross-pathway control protein A	UniRef90_A0A1Y1ZTE4 Cross-pathway control protein 1 n=1 Tax=Clohesyomyces aquaticus TaxID=1231657 RepID=A0A1Y1ZTE4_9PLEO	No hit	0	0.00674939	0.999977	No hit	0
AF_DN92844_c0_g1	0	0	3.57467	Ascomycota	NA	UniRef90_A0A1Y1Z164 Uncharacterized protein n=1 Tax=Clohesyomyces aquaticus TaxID=1231657 RepID=A0A1Y1Z164_9PLEO	No hit	0	0	1	No hit	0
AF_DN83464_c0_g1	0	0	3.57251	Ascomycota	NA	UniRef90_A0A225B3J1 Uncharacterized protein n=1 Tax=Talaromyces atroroseus TaxID=1441469 RepID=A0A225B3J1_9EURO	No hit	0	0	1	No hit	0
AF_DN31938_c0_g1	0	0	3.56707	Ascomycota	NA	UniRef90_A0A177CZ16 Uncharacterized protein n=1 Tax=Paraphaeosphaeria sporulosa TaxID=1460663 RepID=A0A177CZ16_9PLEO	No hit	0	0	1	No hit	0
AF_DN2372_c0_g1	0	0	3.5652	Ascomycota	DNA nickase	UniRef90_A0A066X619 Putative HHE domain-containing protein n=2 Tax=Colletotrichum TaxID=5455 RepID=A0A066X619_COLSU	No hit	0	0	1	No hit	0
AF_DN2636_c0_g1	0.0114901	0	3.56287	No hit found	NA	UniRef90_B3IXK2 Uncharacterized protein n=1 Tax=Alternaria alternata virus 1 TaxID=483537 RepID=B3IXK2_9VIRU	No hit	0.00752609	0	0.999972	No hit	0
AF_DN56802_c0_g1	0	0	3.56018	Ascomycota	Peroxidase	UniRef90_A0A1Q5Q6N7 Catalase-peroxidase n=1 Tax=Talaromyces atroroseus TaxID=1441469 RepID=A0A1Q5Q6N7_9EURO	No hit	0	0	1	No hit	0
AF_DN103436_c0_g1	0	0.0138833	3.5598	Ascomycota	NA	UniRef90_B8MQ67 Zinc finger protein ZPR1 n=4 Tax=Eurotiales TaxID=5042 RepID=B8MQ67_TALSN	No hit	0	0.0090868	0.999959	No hit	0
AF_DN64614_c0_g1	0	0.00722277	3.55944	No hit found	NA	UniRef90_A0A067TX33 Uncharacterized protein n=1 Tax=Galerina marginata (strain CBS 339.88) TaxID=685588 RepID=A0A067TX33_GALM3	No hit	0	0.00474343	0.999989	No hit	0
AF_DN60837_c0_g1	0	0.0238785	3.55789	Asco or Basidio	Large subunit ribosomal protein 6 (Fragment)	UniRef90_A0A099P2Y9 60S ribosomal protein L6-A n=2 Tax=Pichia kudriavzevii TaxID=4909 RepID=A0A099P2Y9_PICKU	No hit	0	0.0155551	0.999879	No hit	0
AF_DN5426_c0_g1	0	0	3.55566	Ascomycota	NA	No hits	No hit	0	0	1	No hit	SP(Sec/SPI)
AF_DN5903_c0_g1	0	0	3.55474	No hit found	NA	UniRef90_A0A165PFL3 Uncharacterized protein n=1 Tax=Exidia glandulosa HHB12029 TaxID=1314781 RepID=A0A165PFL3_EXIGL	No hit	0	0	1	No hit	0
AF_DN24779_c1_g1	0	0	3.55462	Ascomycota	Heat shock protein 70 (Fragment)	UniRef90_A0A177BZM0 Heat shock protein 70b n=2 Tax=Paraphaeosphaeria TaxID=125369 RepID=A0A177BZM0_9PLEO	Hsp70	0	0	1	No hit	0	gnl|TC-DB|P11021|1.A.33.1.5 78 kDa glucose-regulated protein OS=Homo sapiens GN=HSPA5 PE=1 SV=2	75.7009
AF_DN73873_c0_g1	0	0	3.54179	Ascomycota	NA	UniRef90_A0A2H3I8N6 Uncharacterized protein n=1 Tax=Penicillium occitanis TaxID=290292 RepID=A0A2H3I8N6_9EURO	No hit	0	0	1	No hit	0
AF_DN38742_c0_g1	0	0	3.54104	Ascomycota	NA	UniRef90_A0A0N1P068 Elongation factor 3 n=1 Tax=Phialophora attae TaxID=1664694 RepID=A0A0N1P068_9EURO	No hit	0	0	1	No hit	0
AF_DN64230_c0_g1	0	0	3.5401	Ascomycota	Nucleotide-binding, alpha-beta plait	UniRef90_A0A163I3D3 Nucleic acid binding n=2 Tax=Didymellaceae TaxID=683158 RepID=A0A163I3D3_DIDRA	No hit	0	0	1	No hit	0
AF_DN19034_c0_g1	0	0.0184612	3.52767	Ascomycota	Heat shock protein 16	UniRef90_A0A0F4GW13 Uncharacterized protein n=6 Tax=Zymoseptoria TaxID=1047167 RepID=A0A0F4GW13_9PEZI	ACD	0	0.0121119	0.999927	No hit	0
AF_DN73714_c0_g1	0	0	3.52762	Ascomycota	NA	UniRef90_A0A177BWC1 Uncharacterized protein n=1 Tax=Paraphaeosphaeria sporulosa TaxID=1460663 RepID=A0A177BWC1_9PLEO	No hit	0	0	1	No hit	0
AF_DN36219_c0_g1	0.0187016	0	3.52477	No hit found	Cysteine-rich TM module stress tolerance family protein	UniRef90_A0A0D2J2Q3 Rhinocladiella mackenziei CBS 650.93 unplaced genomic scaffold supercont1.1, whole genome shotgun sequence n=1 Tax=Rhinocladiella mackenziei CBS 650.93 TaxID=1442369 RepID=A0A0D2J2Q3_9EURO	No hit	0.0122734	0	0.999925	No hit	0
AF_DN81353_c0_g1	0	0	3.51946	Ascomycota	NA	UniRef90_A0A177CTZ3 Uncharacterized protein n=1 Tax=Paraphaeosphaeria sporulosa TaxID=1460663 RepID=A0A177CTZ3_9PLEO	No hit	0	0	1	No hit	0
AF_DN97335_c0_g1	0	0.039164	3.51836	Ascomycota	NA	UniRef90_A0A225B3P5 Uncharacterized protein n=1 Tax=Talaromyces atroroseus TaxID=1441469 RepID=A0A225B3P5_9EURO	ACD	0	0.0254644	0.999676	No hit	0
AF_DN76667_c0_g1	0	0.0974427	3.51219	Ascomycota	60S ribosomal protein L8-A	UniRef90_A0A1Y1ZSR6 60S ribosomal protein L8-B n=1 Tax=Clohesyomyces aquaticus TaxID=1231657 RepID=A0A1Y1ZSR6_9PLEO	No hit	0	0.0615923	0.998101	No hit	0
AF_DN68299_c0_g1	0	0	3.51079	Basidiomycota	Citrate synthase, mitochondrial (Fragment)	UniRef90_A0A165PYU4 Citrate synthase (Fragment) n=1 Tax=Exidia glandulosa HHB12029 TaxID=1314781 RepID=A0A165PYU4_EXIGL	No hit	0	0	1	No hit	0
AF_DN14014_c0_g1	0	0	3.50976	Basidiomycota	NA	UniRef90_G4TIF9 Uncharacterized protein n=1 Tax=Serendipita indica (strain DSM 11827) TaxID=1109443 RepID=G4TIF9_SERID	No hit	0	0	1	No hit	0
AF_DN15829_c0_g1	0	0	3.50741	Ascomycota	Cytochrome P450 alkane hydroxylase	UniRef90_A0A177DXX4 Cytochrome P450 n=2 Tax=Eukaryota TaxID=2759 RepID=A0A177DXX4_ALTAL	No hit	0	0	1	No hit	0
AF_DN73491_c0_g1	0	0.00883573	3.50172	Ascomycota	Basic-leucine zipper domain	UniRef90_A0A225AVX1 Uncharacterized protein n=1 Tax=Talaromyces atroroseus TaxID=1441469 RepID=A0A225AVX1_9EURO	No hit	0	0.00584713	0.999983	No hit	0
AF_DN89386_c0_g1	0	0	3.49967	Ascomycota	NA	UniRef90_A0A1Y2MEF0 Uncharacterized protein n=1 Tax=Epicoccum nigrum TaxID=105696 RepID=A0A1Y2MEF0_EPING	ACD	0	0	1	No hit	0
AF_DN73698_c0_g1	0	0	3.49789	No hit found	NA	No hits	No hit	0	0	1	No hit	0
AF_DN27157_c0_g1	0	0.022237	3.49229	Basidiomycota	General substrate transporter	UniRef90_A0A0H2RH39 Sugar transporter n=1 Tax=Schizopora paradoxa TaxID=27342 RepID=A0A0H2RH39_9HOMO	No hit	0	0.0146376	0.999893	No hit	0
AF_DN83826_c0_g1	0	0	3.49227	Basidiomycota	NA	No hits	No hit	0	0	1	No hit	0
AF_DN58021_c0_g1	0	0	3.48813	Ascomycota	NA	UniRef90_A0A2H3I7D5 Uncharacterized protein n=3 Tax=Eurotiales TaxID=5042 RepID=A0A2H3I7D5_9EURO	No hit	0	0	1	No hit	0
AF_DN77588_c0_g1	0	0	3.48752	Ascomycota	NA	UniRef90_A0A0N1P083 Asparagine synthetase [glutamine-hydrolyzing] 2 n=2 Tax=Chaetothyriales TaxID=34395 RepID=A0A0N1P083_9EURO	No hit	0	0	1	No hit	0
AF_DN22244_c0_g1	0	0.0180579	3.48689	Basidiomycota	ATP-dependent RNA helicase DED1 (Fragment)	UniRef90_A0A0H2RNQ5 ATP-dependent RNA helicase ded-1 n=1 Tax=Schizopora paradoxa TaxID=27342 RepID=A0A0H2RNQ5_9HOMO	No hit	0	0.0119211	0.999929	No hit	0
AF_DN32441_c0_g1	0	0	3.48192	Basidiomycota	NA	No hits	No hit	0	0	1	No hit	0
AF_DN64080_c0_g1	0	0.0042082	3.48154	Basidiomycota	p-loop containing nucleoside triphosphate hydrolase protein (Fragment)	UniRef90_A0A165K9K8 p-loop containing nucleoside triphosphate hydrolase protein n=1 Tax=Exidia glandulosa HHB12029 TaxID=1314781 RepID=A0A165K9K8_EXIGL	No hit	0	0.00279963	0.999996	No hit	0
AF_DN60612_c0_g1	0	0	3.48076	Ascomycota	NA	UniRef90_A0A1Y2AAC2 Uncharacterized protein n=1 Tax=Clohesyomyces aquaticus TaxID=1231657 RepID=A0A1Y2AAC2_9PLEO	DnaJ	0	0	1	No hit	0
AF_DN96130_c0_g1	0	0	3.47993	Ascomycota	NA	UniRef90_A0A1Y1ZW09 Uncharacterized protein n=1 Tax=Clohesyomyces aquaticus TaxID=1231657 RepID=A0A1Y1ZW09_9PLEO	No hit	0	0	1	No hit	0
AF_DN9796_c0_g1	0.016156	0.0128869	3.47842	Ascomycota	NA	UniRef90_A0A1Y1ZZ85 Glycoside hydrolase superfamily n=1 Tax=Clohesyomyces aquaticus TaxID=1231657 RepID=A0A1Y1ZZ85_9PLEO	No hit	0.0106888	0.00853971	0.999906	GH17(19)	0
AF_DN109030_c0_g1	0	0	3.47583	Ascomycota	NA	UniRef90_A0A1Y1ZFA0 Cytochrome P450 3A3 n=1 Tax=Clohesyomyces aquaticus TaxID=1231657 RepID=A0A1Y1ZFA0_9PLEO	No hit	0	0	1	No hit	0
AF_DN18357_c0_g1	0	0	3.472	Ascomycota	NA	UniRef90_A0A1L9X225 6-phosphogluconate dehydrogenase, decarboxylating n=1 Tax=Aspergillus aculeatus ATCC 16872 TaxID=690307 RepID=A0A1L9X225_ASPAC	No hit	0	0	1	No hit	0
AF_DN95097_c0_g1	0	0.0125686	3.46957	Basidiomycota	RlpA-like double-psi beta-barrel domain	UniRef90_A0A0H2RSV1 Barwin-like endoglucanase n=1 Tax=Schizopora paradoxa TaxID=27342 RepID=A0A0H2RSV1_9HOMO	No hit	0	0.00834159	0.999965	No hit	0
AF_DN54652_c0_g1	0.0089475	0	3.45756	Ascomycota	Murein transglycosylase	UniRef90_A0A225ACF8 Putative glycosidase crf2 n=1 Tax=Talaromyces atroroseus TaxID=1441469 RepID=A0A225ACF8_9EURO	No hit	0.00595981	0	0.999982	GH16(83-269)	SP(Sec/SPI)
AF_DN78666_c0_g1	0	0	3.45633	Ascomycota	NA	UniRef90_A0A1Y1ZTE4 Cross-pathway control protein 1 n=1 Tax=Clohesyomyces aquaticus TaxID=1231657 RepID=A0A1Y1ZTE4_9PLEO	No hit	0	0	1	No hit	0
AF_DN12618_c0_g1	0	0	3.44058	Basidiomycota	NA	No hits	No hit	0	0	1	No hit	0
AF_DN42166_c1_g1	0	0	3.44013	Basidiomycota	NA	No hits	No hit	0	0	1	No hit	0
AF_DN93516_c0_g1	0	0.00799553	3.43933	Ascomycota	Butanediol dehydrogenase	UniRef90_A0A165QTP8 Putative zinc-type alcohol dehydrogenase-like protein n=1 Tax=Exidia glandulosa HHB12029 TaxID=1314781 RepID=A0A165QTP8_EXIGL	No hit	0	0.00534291	0.999986	GH93	0
AF_DN86043_c0_g1	0	0	3.43067	No hit found	NA	UniRef90_A0A1Y1ZUX1 Uncharacterized protein n=1 Tax=Clohesyomyces aquaticus TaxID=1231657 RepID=A0A1Y1ZUX1_9PLEO	No hit	0	0	1	No hit	0
AF_DN56628_c0_g1	0	0.0197697	3.42412	Basidiomycota	Fumarate reductase	UniRef90_K5WZ26 Uncharacterized protein n=2 Tax=Agaricus bisporus TaxID=5341 RepID=K5WZ26_AGABU	No hit	0	0.0131635	0.999913	No hit	0
AF_DN96950_c0_g1	0	0	3.42091	Ascomycota	NA	UniRef90_B8MTB5 Translational initiation factor 2 beta n=8 Tax=Eurotiales TaxID=5042 RepID=B8MTB5_TALSN	No hit	0	0	1	No hit	0
AF_DN55508_c0_g1	0	0	3.42053	No hit found	NA	No hits	No hit	0	0	1	No hit	0
AF_DN43326_c0_g1	0	0	3.41342	Ascomycota	NA	UniRef90_W9W0T1 Uncharacterized protein n=4 Tax=Herpotrichiellaceae TaxID=43219 RepID=W9W0T1_9EURO	No hit	0	0	1	No hit	0
AF_DN93889_c0_g1	0	0	3.41199	No hit found	NA	UniRef90_A0A0C3LE29 Uncharacterized protein n=1 Tax=Tulasnella calospora MUT 4182 TaxID=1051891 RepID=A0A0C3LE29_9HOMO	No hit	0	0	1	No hit	0
AF_DN21774_c0_g1	0	0	3.41144	Ascomycota	Transcriptional activator Helix-turn-helix type 3	UniRef90_B2VZ45 Multiprotein-bridging factor 1 n=12 Tax=Pleosporineae TaxID=715340 RepID=B2VZ45_PYRTR	No hit	0	0	1	No hit	0
AF_DN41827_c0_g1	0	0	3.40971	Ascomycota	NA	UniRef90_A0A162Z8H5 Uncharacterized protein n=1 Tax=Didymella rabiei TaxID=5454 RepID=A0A162Z8H5_DIDRA	No hit	0	0	1	No hit	0
AF_DN107564_c0_g1	0	0	3.40607	Ascomycota	NA	UniRef90_A0A178EMB1 Uncharacterized protein n=1 Tax=Pyrenochaeta sp. DS3sAY3a TaxID=765867 RepID=A0A178EMB1_9PLEO	No hit	0	0	1	No hit	0
AF_DN104318_c0_g1	0	0	3.40558	Ascomycota	NA	UniRef90_A0A2H3J197 Zinc finger, CCHC-type n=1 Tax=Penicillium occitanis TaxID=290292 RepID=A0A2H3J197_9EURO	No hit	0	0	1	No hit	0
AF_DN92801_c0_g1	0	0	3.40476	Basidiomycota	NA	UniRef90_A0A067TWH1 Uncharacterized protein n=1 Tax=Galerina marginata (strain CBS 339.88) TaxID=685588 RepID=A0A067TWH1_GALM3	No hit	0	0	1	No hit	0
AF_DN51413_c5_g1	0.0504023	0.121031	3.40291	Ascomycota	NA	No hits	No hit	0.0330582	0.0768072	0.996498	No hit	0
AF_DN30858_c0_g1	0	0	3.40276	Basidiomycota	Cytochrome-c from the OXPHOS pathway	UniRef90_A0A151W0S3 Cytochrome c n=3 Tax=Agaricomycetes TaxID=155619 RepID=A0A151W0S3_HYPMA	No hit	0	0	1	No hit	0
AF_DN64950_c0_g1	0	0	3.40247	Ascomycota	NA	UniRef90_W9WC72 Uncharacterized protein n=4 Tax=Herpotrichiellaceae TaxID=43219 RepID=W9WC72_9EURO	No hit	0	0	1	No hit	0
AF_DN23107_c0_g1	0	0	3.40201	No hit found	NA	UniRef90_A0A0H2RY17 Uncharacterized protein n=1 Tax=Schizopora paradoxa TaxID=27342 RepID=A0A0H2RY17_9HOMO	No hit	0	0	1	No hit	0
AF_DN32244_c0_g1	0	0	3.40091	No hit found	NA	UniRef90_J0LK50 Uncharacterized protein n=1 Tax=Auricularia subglabra (strain TFB-10046 / SS5) TaxID=717982 RepID=J0LK50_AURST	No hit	0	0	1	No hit	0
AF_DN26521_c0_g1	0	0	3.39666	Ascomycota	GTPase-activating protein	UniRef90_A0A175VV64 GTPase-activating protein GYP7 n=1 Tax=Madurella mycetomatis TaxID=100816 RepID=A0A175VV64_9PEZI	No hit	0	0	1	No hit	0
AF_DN36735_c0_g1	0	0	3.39645	Ascomycota	Adventurous-gliding motility protein Z	UniRef90_A0A225A8C1 Uncharacterized protein n=1 Tax=Talaromyces atroroseus TaxID=1441469 RepID=A0A225A8C1_9EURO	No hit	0	0	1	No hit	0
AF_DN38454_c0_g1	0	0.00535017	3.38939	Basidiomycota	p-loop containing nucleoside triphosphate hydrolase protein	UniRef90_A0A0H2RR89 Uncharacterized protein n=1 Tax=Schizopora paradoxa TaxID=27342 RepID=A0A0H2RR89_9HOMO	Hsp100	0	0.00360729	0.999993	No hit	0
AF_DN24653_c0_g1	0	0	3.3788	Ascomycota	Basic-leucine zipper domain	UniRef90_A0A177CXV7 PAP1-domain-containing protein n=1 Tax=Paraphaeosphaeria sporulosa TaxID=1460663 RepID=A0A177CXV7_9PLEO	No hit	0	0	1	No hit	0
AF_DN93656_c0_g1	0	0	3.37526	Ascomycota	NA	UniRef90_A0A1Y1YQI4 Uncharacterized protein n=1 Tax=Clohesyomyces aquaticus TaxID=1231657 RepID=A0A1Y1YQI4_9PLEO	No hit	0	0	1	No hit	0
AF_DN94784_c0_g1	0	0	3.37124	Basidiomycota	NA	UniRef90_A0A0H2RZ36 LAG1-DNAbind-domain-containing protein n=1 Tax=Schizopora paradoxa TaxID=27342 RepID=A0A0H2RZ36_9HOMO	No hit	0	0	1	No hit	0
AF_DN80688_c0_g1	0	0	3.36575	Ascomycota	Calcium-binding protein NCS-1	UniRef90_B6QUT2 Calcium-binding signaling protein Frq1, putative n=1 Tax=Talaromyces marneffei (strain ATCC 18224 / CBS 334.59/ QM 7333) TaxID=441960 RepID=B6QUT2_TALMQ	No hit	0	0	1	No hit	0	gnl|TC-DB|P84074|8.A.82.2.8 Neuron-specific calcium-binding protein hippocalcin OS=Homo sapiens OX=9606 GN=HPCA PE=1 SV=2	78.7037
AF_DN67826_c0_g1	0	0	3.36245	Ascomycota	NA	UniRef90_F8QX20 Mitochondrial heat shock protein SSC1 n=1 Tax=Endocarpon pusillum TaxID=364733 RepID=F8QX20_9EURO	Hsp70	0	0	1	No hit	0
AF_DN105515_c0_g1	0	0	3.35844	Basidiomycota	Ras family, other	UniRef90_A0A165ZZN2 Ras-domain-containing protein n=2 Tax=Basidiomycota TaxID=5204 RepID=A0A165ZZN2_EXIGL	No hit	0	0	1	No hit	0
AF_DN83473_c0_g1	0	0	3.35797	Basidiomycota	ATP-dependent RNA helicase DBP2 (Fragment)	UniRef90_A0A0C9YQK6 Unplaced genomic scaffold K443scaffold_1, whole genome shotgun sequence n=3 Tax=Agaricales TaxID=5338 RepID=A0A0C9YQK6_9AGAR	No hit	0	0	1	No hit	0
AF_DN94109_c0_g1	0	0	3.35747	Ascomycota	RNA binding	UniRef90_A0A0D2I7F6 Rhinocladiella mackenziei CBS 650.93 unplaced genomic scaffold supercont1.7, whole genome shotgun sequence n=1 Tax=Rhinocladiella mackenziei CBS 650.93 TaxID=1442369 RepID=A0A0D2I7F6_9EURO	No hit	0	0	1	No hit	0
AF_DN54579_c0_g1	0	0	3.35741	Ascomycota	NA	UniRef90_A0A1Y2A3M9 Uncharacterized protein n=1 Tax=Clohesyomyces aquaticus TaxID=1231657 RepID=A0A1Y2A3M9_9PLEO	No hit	0	0	1	No hit	0
AF_DN56256_c0_g1	0.027199	0.0232127	3.3556	Ascomycota	Glyceraldehyde-3-phosphate dehydrogenase	UniRef90_A0A072NZX6 Glyceraldehyde-3-phosphate dehydrogenase n=1 Tax=Exophiala aquamarina CBS 119918 TaxID=1182545 RepID=A0A072NZX6_9EURO	No hit	0.0182322	0.0155905	0.999712	No hit	0
AF_DN82680_c0_g1	0	0	3.35361	Ascomycota	NA	No hits	No hit	0	0	1	No hit	0
AF_DN74232_c0_g1	0	0	3.34811	Ascomycota	DDHD domain-containing protein	UniRef90_B2W0X5 Uncharacterized protein n=16 Tax=Pleosporales TaxID=92860 RepID=B2W0X5_PYRTR	No hit	0	0	1	No hit	0
AF_DN44127_c0_g1	0	0	3.34623	Basidiomycota	NA	UniRef90_A0A166ALR1 Uncharacterized protein n=1 Tax=Exidia glandulosa HHB12029 TaxID=1314781 RepID=A0A166ALR1_EXIGL	No hit	0	0	1	No hit	SP(Sec/SPI)
AF_DN57290_c0_g1	0.0258052	0	3.34619	Ascomycota	NA	UniRef90_N1PH55 Uncharacterized protein n=1 Tax=Dothistroma septosporum (strain NZE10 / CBS 128990) TaxID=675120 RepID=N1PH55_DOTSN	No hit	0.0173376	0	0.99985	No hit	0
AF_DN21421_c0_g1	0	0	3.33961	Ascomycota	NA	UniRef90_W2RJW8 Uncharacterized protein n=1 Tax=Cyphellophora europaea CBS 101466 TaxID=1220924 RepID=W2RJW8_9EURO	No hit	0	0	1	No hit	0
AF_DN83851_c0_g1	0	0	3.33225	Basidiomycota	NA	UniRef90_A0A0C3BKU2 Uncharacterized protein n=1 Tax=Hebeloma cylindrosporum h7 TaxID=686832 RepID=A0A0C3BKU2_HEBCY	No hit	0	0	1	No hit	0
AF_DN42797_c0_g1	0	0	3.332	Ascomycota	NA	No hits	No hit	0	0	1	No hit	0
AF_DN56322_c0_g1	0	0	3.3311	No hit found	NA	UniRef90_A0A0H2RZ36 LAG1-DNAbind-domain-containing protein n=1 Tax=Schizopora paradoxa TaxID=27342 RepID=A0A0H2RZ36_9HOMO	No hit	0	0	1	No hit	0
AF_DN84938_c0_g1	0	0	3.32176	No hit found	NA	No hits	No hit	0	0	1	No hit	0
AF_DN32718_c1_g1	0	0.0126373	3.32014	Basidiomycota	Plasma membrane ATPase	UniRef90_A0A0H2S555 Plasma membrane ATPase n=1 Tax=Schizopora paradoxa TaxID=27342 RepID=A0A0H2S555_9HOMO	No hit	0	0.0085818	0.999963	No hit	0	gnl|TC-DB|Q9LY32|3.A.3.3.12 ATPase 7, plasma membrane-type OS=Arabidopsis thaliana OX=3702 GN=AHA7 PE=3 SV=1	75.4045
AF_DN67115_c0_g1	0	0	3.31139	Ascomycota	Pathogenesis associated protein Cap20	UniRef90_A0A0G2GGZ6 Putative pathogenesis associated protein n=1 Tax=Phaeomoniella chlamydospora TaxID=158046 RepID=A0A0G2GGZ6_9EURO	No hit	0	0	1	No hit	0
AF_DN23485_c0_g1	0	0.0244231	3.30883	Basidiomycota	Transaldolase	UniRef90_S7PV39 Transaldolase n=2 Tax=Gloeophyllaceae TaxID=452340 RepID=S7PV39_GLOTA	No hit	0	0.0165174	0.999864	No hit	0
AF_DN99665_c0_g1	0	0	3.30823	No hit found	NA	UniRef90_A0A165HUF5 Uncharacterized protein n=1 Tax=Exidia glandulosa HHB12029 TaxID=1314781 RepID=A0A165HUF5_EXIGL	No hit	0	0	1	No hit	0
AF_DN101196_c0_g1	0	0	3.30542	Ascomycota	NA	UniRef90_A0A225ARU3 Uncharacterized protein n=1 Tax=Talaromyces atroroseus TaxID=1441469 RepID=A0A225ARU3_9EURO	No hit	0	0	1	No hit	0
AF_DN30810_c0_g1	0	0	3.30322	Basidiomycota	NA	No hits	No hit	0	0	1	No hit	0
AF_DN32026_c0_g1	0	0	3.30307	Ascomycota	Peroxisomal catalase	UniRef90_R7YV09 Catalase n=1 Tax=Coniosporium apollinis (strain CBS 100218) TaxID=1168221 RepID=R7YV09_CONA1	No hit	0	0	1	No hit	0
AF_DN9937_c0_g1	0	0	3.30238	Ascomycota	NA	No hits	No hit	0	0	1	No hit	0
AF_DN76953_c0_g1	0	0.0586637	3.30183	Ascomycota	Glyceraldehyde-3-phosphate dehydrogenase (Fragment)	UniRef90_H6BMP2 Glyceraldehyde-3-phosphate dehydrogenase n=7 Tax=Chaetothyriales TaxID=34395 RepID=H6BMP2_EXODN	No hit	0	0.0390421	0.999238	No hit	0	gnl|TC-DB|B3ET62|3.A.23.6.1 Glyceraldehyde-3-phosphate dehydrogenase OS=Amoebophilus asiaticus (strain 5a2) GN=Aasi_1069 PE=3 SV=1	73.8318
AF_DN83463_c0_g1	0	0.0436907	3.29945	Ascomycota	Glutamine synthetase	UniRef90_A0A178ECG1 Glutamine synthetase n=1 Tax=Pyrenochaeta sp. DS3sAY3a TaxID=765867 RepID=A0A178ECG1_9PLEO	No hit	0	0.0293076	0.99957	No hit	0
AF_DN75156_c0_g1	0	0	3.2993	Ascomycota	NA	UniRef90_A0A177CN29 Kinase-like protein n=1 Tax=Paraphaeosphaeria sporulosa TaxID=1460663 RepID=A0A177CN29_9PLEO	No hit	0	0	1	No hit	0
AF_DN97760_c0_g1	0	0.0851623	3.29788	Basidiomycota	NA	UniRef90_A0A0H2RYN7 Acyltransferase ChoActase/COT/CPT n=1 Tax=Schizopora paradoxa TaxID=27342 RepID=A0A0H2RYN7_9HOMO	No hit	0	0.0559634	0.998433	No hit	0
AF_DN73856_c0_g1	0	0	3.29331	Basidiomycota	UTP-glucose-1-phosphate uridylyltransferase	UniRef90_A0A067SXY3 UTP--glucose-1-phosphate uridylyltransferase n=1 Tax=Galerina marginata (strain CBS 339.88) TaxID=685588 RepID=A0A067SXY3_GALM3	No hit	0	0	1	No hit	0
AF_DN21503_c0_g1	0	0	3.29316	Basidiomycota	NA	UniRef90_G4TXM6 Probable DHA14-like major facilitator ABC transporter n=1 Tax=Serendipita indica (strain DSM 11827) TaxID=1109443 RepID=G4TXM6_SERID	No hit	0	0	1	No hit	0
AF_DN35476_c0_g1	0	0.00909097	3.29229	Ascomycota	Related to Protein involved in sporulation and meiosis	UniRef90_G2QMF9 Uncharacterized protein n=1 Tax=Myceliophthora thermophila (strain ATCC 42464 / BCRC 31852 / DSM 1799) TaxID=573729 RepID=G2QMF9_MYCTT	No hit	0	0.00621196	0.999981	No hit	0
AF_DN71528_c0_g1	0	0	3.28892	Basidiomycota	Putative methionine adenosyltransferase (Fragment)	UniRef90_A0A0C3QLT5 S-adenosylmethionine synthase (Fragment) n=1 Tax=Tulasnella calospora MUT 4182 TaxID=1051891 RepID=A0A0C3QLT5_9HOMO	No hit	0	0	1	No hit	0
AF_DN56391_c0_g1	0	0	3.2882	No hit found	Period circadian protein	No hits	No hit	0	0	1	No hit	0
AF_DN7233_c0_g1	0	0	3.284	No hit found	NA	UniRef90_A0A165MBC3 Pali-domain-containing protein n=1 Tax=Exidia glandulosa HHB12029 TaxID=1314781 RepID=A0A165MBC3_EXIGL	No hit	0	0	1	No hit	0
AF_DN13497_c0_g1	0	0.0462927	3.28388	Basidiomycota	NA	UniRef90_A0A0H2RT81 Aspartic protease n=1 Tax=Schizopora paradoxa TaxID=27342 RepID=A0A0H2RT81_9HOMO	No hit	0	0.0310898	0.999517	No hit	0
AF_DN24677_c0_g1	0	0.00765823	3.28312	Basidiomycota	Macrofage activating glyco	UniRef90_A0A165CZN7 Uncharacterized protein n=1 Tax=Exidia glandulosa HHB12029 TaxID=1314781 RepID=A0A165CZN7_EXIGL	No hit	0	0.00524441	0.999986	No hit	SP(Sec/SPI)
AF_DN1474_c0_g1	0	0	3.28307	Ascomycota	NA	UniRef90_B8M5M5 CP2 transcription factor, putative n=1 Tax=Talaromyces stipitatus (strain ATCC 10500 / CBS 375.48 / QM 6759/ NRRL 1006) TaxID=441959 RepID=B8M5M5_TALSN	No hit	0	0	1	No hit	0
AF_DN97005_c0_g1	0	0	3.27843	No hit found	NA	UniRef90_A0A178EHN7 DUF1752-domain-containing protein n=1 Tax=Pyrenochaeta sp. DS3sAY3a TaxID=765867 RepID=A0A178EHN7_9PLEO	No hit	0	0	1	No hit	0
AF_DN84551_c0_g1	0	0	3.2772	No hit found	NA	No hits	No hit	0	0	1	No hit	0
AF_DN89663_c0_g1	0	0	3.2744	Ascomycota	NA	UniRef90_B8LW33 Uncharacterized protein n=1 Tax=Talaromyces stipitatus (strain ATCC 10500 / CBS 375.48 / QM 6759 / NRRL 1006)TaxID=441959 RepID=B8LW33_TALSN	No hit	0	0	1	No hit	0
AF_DN86375_c0_g1	0.0172664	0	3.26578	Basidiomycota	NA	No hits	No hit	0.0118003	0	0.99993	No hit	0
AF_DN103618_c0_g1	0	0	3.26235	Basidiomycota	6-phosphogluconate dehydrogenase	UniRef90_A0A0C2XM62 6-phosphogluconate dehydrogenase, decarboxylating n=1 Tax=Amanita muscaria Koide BX008 TaxID=946122 RepID=A0A0C2XM62_AMAMU	No hit	0	0	1	No hit	0
AF_DN90480_c0_g1	0	0	3.26008	Basidiomycota	NA	UniRef90_A0A0H2RRD9 NADPH-dependent glutamate synthase n=1 Tax=Schizopora paradoxa TaxID=27342 RepID=A0A0H2RRD9_9HOMO	No hit	0	0	1	No hit	0
AF_DN89441_c0_g1	0	0	3.2597	Basidiomycota	Integral component of membrane	UniRef90_A0A165QZX8 Uncharacterized protein n=1 Tax=Exidia glandulosa HHB12029 TaxID=1314781 RepID=A0A165QZX8_EXIGL	No hit	0	0	1	No hit	0
AF_DN27535_c0_g1	0	0	3.25908	Basidiomycota	NA	No hits	No hit	0	0	1	No hit	0
AF_DN74189_c0_g1	0	0	3.25601	Basidiomycota	NA	UniRef90_A0A0H2S7Y6 Uncharacterized protein n=1 Tax=Schizopora paradoxa TaxID=27342 RepID=A0A0H2S7Y6_9HOMO	No hit	0	0	1	No hit	0
AF_DN70377_c0_g1	0	0	3.25586	Ascomycota	ATP-dependent RNA helicase eIF4A (Fragment)	UniRef90_A0A0G2G591 Putative eukaryotic translation initiation factor n=1 Tax=Phaeomoniella chlamydospora TaxID=158046 RepID=A0A0G2G591_9EURO	No hit	0	0	1	No hit	0	gnl|TC-DB|P38919|3.A.18.1.1 Eukaryotic initiation factor 4A-III - Homo sapiens (Human).	84.1772
AF_DN36534_c0_g1	0	0.013941	3.25561	Basidiomycota	NA	UniRef90_A0A0H2RVH3 Acid protease n=1 Tax=Schizopora paradoxa TaxID=27342 RepID=A0A0H2RVH3_9HOMO	No hit	0	0.00955928	0.999954	No hit	SP(Sec/SPI)
AF_DN23499_c0_g1	0	0	3.25406	Basidiomycota	NA	UniRef90_A0A067TY36 Uncharacterized protein n=1 Tax=Galerina marginata (strain CBS 339.88) TaxID=685588 RepID=A0A067TY36_GALM3	No hit	0	0	1	No hit	0	gnl|TC-DB|CCA70369|5.B.1.1.10 probable NADPH oxidase heavy chain subunit [Serendipita indica DSM 11827]	91.3043
AF_DN67425_c0_g1	0	0.0301543	3.25037	Ascomycota	NA	No hits	ACD	0	0.0205268	0.999789	No hit	0
AF_DN64592_c0_g1	0	0	3.24908	Ascomycota	NA	No hits	No hit	0	0	1	No hit	0
AF_DN64239_c0_g1	0	0	3.24888	Basidiomycota	Cellulose monooxygenase	UniRef90_A0A165KDR3 Uncharacterized protein n=1 Tax=Exidia glandulosa HHB12029 TaxID=1314781 RepID=A0A165KDR3_EXIGL	No hit	0	0	1	AA9(11-234)	SP(Sec/SPI)
AF_DN77642_c0_g1	0.039333	0	3.24862	Ascomycota	GPI-anchored CFEM domain protein B	UniRef90_C5FK46 Proline-rich antigen n=1 Tax=Arthroderma otae (strain ATCC MYA-4605 / CBS 113480) TaxID=554155 RepID=C5FK46_ARTOC	No hit	0.0266595	0	0.999645	No hit	0
AF_DN78158_c0_g1	0	0	3.24706	Ascomycota	NA	UniRef90_A0A225ANU5 Uncharacterized protein n=1 Tax=Talaromyces atroroseus TaxID=1441469 RepID=A0A225ANU5_9EURO	No hit	0	0	1	No hit	0
AF_DN84471_c0_g1	0	0	3.24652	Other fungi	NA	UniRef90_A0A2H5U451 Uncharacterized protein n=6 Tax=Rhizophagus irregularis TaxID=588596 RepID=A0A2H5U451_RHIID	No hit	0	0	1	No hit	0
AF_DN7908_c0_g1	0	0	3.2463	Asco or Basidio	NA	UniRef90_A0A0D2FC39 Uncharacterized protein n=1 Tax=Phialophora americana TaxID=5601 RepID=A0A0D2FC39_9EURO	No hit	0	0	1	No hit	0
AF_DN62024_c0_g1	0	0	3.24551	Ascomycota	NA	UniRef90_W9X260 Uncharacterized protein n=2 Tax=Cladophialophora TaxID=82105 RepID=W9X260_9EURO	No hit	0	0	1	No hit	0
AF_DN55734_c0_g1	0	0	3.24495	Basidiomycota	NA	UniRef90_A0A0H2SA76 Amino acid permease n=1 Tax=Schizopora paradoxa TaxID=27342 RepID=A0A0H2SA76_9HOMO	No hit	0	0	1	No hit	0
AF_DN17440_c0_g1	0.0155683	0	3.24116	Ascomycota	Cerevisin	UniRef90_A5A8K5 Subtilisin-like serine protease n=1 Tax=Acremonium sp. F11177 TaxID=443225 RepID=A5A8K5_9Ascomycota	No hit	0.0106915	0	0.999943	No hit	0
AF_DN81668_c0_g1	0.0637623	0	3.24099	Basidiomycota	NA	No hits	No hit	0.0427434	0	0.999086	No hit	SP(Sec/SPI)
AF_DN14077_c0_g1	0	0	3.23991	Ascomycota	NA	UniRef90_A0A1Y1ZT16 High affinity glucose transporter n=1 Tax=Clohesyomyces aquaticus TaxID=1231657 RepID=A0A1Y1ZT16_9PLEO	No hit	0	0	1	No hit	0
AF_DN65360_c0_g1	0	0	3.23325	Ascomycota	NA	No hits	No hit	0	0	1	No hit	0
AF_DN94596_c0_g1	0	0	3.2325	Ascomycota	NA	UniRef90_A0A1Y2X5I4 Uncharacterized protein n=2 Tax=Hypoxylaceae TaxID=2033035 RepID=A0A1Y2X5I4_9PEZI	No hit	0	0	1	No hit	SP(Sec/SPI)
AF_DN21772_c0_g1	0.0110863	0	3.23069	Basidiomycota	RNA-binding domain-containing	UniRef90_A0A165QNX4 RNA-binding domain-containing protein n=1 Tax=Exidia glandulosa HHB12029 TaxID=1314781 RepID=A0A165QNX4_EXIGL	No hit	0.00764368	0	0.999971	No hit	0
AF_DN62597_c0_g1	0	0	3.22863	No hit found	NA	No hits	No hit	0	0	1	No hit	0
AF_DN12208_c0_g1	0	0	3.22526	Ascomycota	NA	UniRef90_A0A162ZXF0 Amino acid transmembrane transporter n=2 Tax=Didymellaceae TaxID=683158 RepID=A0A162ZXF0_DIDRA	No hit	0	0	1	No hit	0
AF_DN89881_c0_g1	0	0.0316305	3.21912	Asco or Basidio	Glycosyl transferase family 2 protein	UniRef90_A8NSW4 Uncharacterized protein n=1 Tax=Coprinopsis cinerea (strain Okayama-7 / 130 / ATCC MYA-4618 / FGSC 9003)TaxID=240176 RepID=A8NSW4_COPC7	No hit	0	0.0216259	0.999766	No hit	0
AF_DN86536_c0_g1	0	0	3.21737	Basidiomycota	NA	UniRef90_A0A0H2SSA8 Uncharacterized protein n=1 Tax=Schizopora paradoxa TaxID=27342 RepID=A0A0H2SSA8_9HOMO	No hit	0	0	1	No hit	0
AF_DN66514_c0_g1	0	0	3.20956	Basidiomycota	Peroxidase	UniRef90_A0A0H2RW08 Peroxidase n=1 Tax=Schizopora paradoxa TaxID=27342 RepID=A0A0H2RW08_9HOMO	No hit	0	0	1	AA2(1-227)	0
AF_DN45466_c0_g1	0	0.0074048	3.20772	Ascomycota	Putative Function: S. cerevisiae RTA1 gene is involved in 7-aminocholesterol resistance	UniRef90_A0A0D2YAL9 Uncharacterized protein n=21 Tax=Fusarium TaxID=5506 RepID=A0A0D2YAL9_FUSO4	No hit	0	0.00513418	0.999987	No hit	0
AF_DN83937_c0_g1	0	0	3.20704	Ascomycota	Alcohol dehydrogenase	UniRef90_A0A1Y2A304 Alcohol dehydrogenase n=1 Tax=Clohesyomyces aquaticus TaxID=1231657 RepID=A0A1Y2A304_9PLEO	No hit	0	0	1	No hit	0
AF_DN106903_c0_g1	0	0	3.20197	Ascomycota	NA	UniRef90_A0A225AX42 Uncharacterized protein n=1 Tax=Talaromyces atroroseus TaxID=1441469 RepID=A0A225AX42_9EURO	No hit	0	0	1	No hit	0
AF_DN55462_c0_g1	0	0	3.20193	No hit found	NA	UniRef90_A0A165MF47 Uncharacterized protein n=1 Tax=Exidia glandulosa HHB12029 TaxID=1314781 RepID=A0A165MF47_EXIGL	No hit	0	0	1	No hit	0
AF_DN87212_c0_g1	0	0	3.20045	Basidiomycota	Ribosomal protein S3 C-terminal domain-containing protein	UniRef90_B0D4A1 Predicted protein n=5 Tax=Agaricomycetidae TaxID=452333 RepID=B0D4A1_LACBS	No hit	0	0	1	No hit	0
AF_DN55008_c0_g1	0	0	3.19818	Ascomycota	Dual specificity mitogen-activated protein kinase kinase dSOR1	UniRef90_A0A225B0F3 Uncharacterized protein n=1 Tax=Talaromyces atroroseus TaxID=1441469 RepID=A0A225B0F3_9EURO	No hit	0	0	1	No hit	0
AF_DN8437_c0_g1	0	0	3.19675	No hit found	NA	UniRef90_A0A0H2RLH6 Uncharacterized protein n=1 Tax=Schizopora paradoxa TaxID=27342 RepID=A0A0H2RLH6_9HOMO	No hit	0	0	1	No hit	0
AF_DN603_c0_g1	0	0	3.19584	Ascomycota	NA	UniRef90_A0A0N1NZ76 NADP-dependent alcohol dehydrogenase 6 n=1 Tax=Phialophora attae TaxID=1664694 RepID=A0A0N1NZ76_9EURO	No hit	0	0	1	No hit	0
AF_DN93069_c0_g1	0	0	3.19137	Ascomycota	NA	UniRef90_Q0UPM4 Uncharacterized protein n=2 Tax=Pleosporineae TaxID=715340 RepID=Q0UPM4_PHANO	No hit	0	0	1	No hit	0
AF_DN24638_c0_g1	0	0	3.19087	Ascomycota	Regulation of cyclin-dependent protein serine/threonine kinase	UniRef90_A0A1Y1ZPX6 Uncharacterized protein n=1 Tax=Clohesyomyces aquaticus TaxID=1231657 RepID=A0A1Y1ZPX6_9PLEO	No hit	0	0	1	No hit	0
AF_DN92704_c0_g1	0	0	3.18916	Ascomycota	NA	No hits	No hit	0	0	1	No hit	0
AF_DN22576_c0_g1	0	0	3.18098	Basidiomycota	NA	UniRef90_A0A0D7AIM6 Uncharacterized protein n=2 Tax=Fistulina hepatica ATCC 64428 TaxID=1128425 RepID=A0A0D7AIM6_9AGAR	No hit	0	0	1	No hit	0
AF_DN101724_c0_g1	0	0	3.17239	No hit found	NA	UniRef90_A0A2C5Z2Z8 Uncharacterized protein n=1 Tax=Ophiocordyceps camponoti-rufipedis TaxID=2004952 RepID=A0A2C5Z2Z8_9HYPO	ACD	0	0	1	No hit	0
AF_DN79598_c0_g1	0	0	3.16993	Ascomycota	S-adenosylmethionine synthase-like protein (Fragment)	UniRef90_J3NSC2 S-adenosylmethionine synthase n=5 Tax=Magnaporthaceae TaxID=81093 RepID=J3NSC2_GAGT3	No hit	0	0	1	No hit	0
AF_DN81686_c0_g1	0	0	3.16669	Basidiomycota	NA	No hits	No hit	0	0	1	No hit	0
AF_DN90588_c0_g1	0	0	3.1659	Basidiomycota	NA	UniRef90_A0A0D2L3M9 Uncharacterized protein n=1 Tax=Hypholoma sublateritium FD-334 SS-4 TaxID=945553 RepID=A0A0D2L3M9_9AGAR	No hit	0	0	1	No hit	0
AF_DN57706_c0_g1	0	0	3.1634	Basidiomycota	NA	UniRef90_A0A067T1G6 Uncharacterized protein n=1 Tax=Galerina marginata (strain CBS 339.88) TaxID=685588 RepID=A0A067T1G6_GALM3	No hit	0	0	1	No hit	0
AF_DN67111_c0_g1	0	0	3.16109	Basidiomycota	NA	UniRef90_A0A0H2S2L6 p-loop containing nucleoside triphosphate hydrolase protein n=1 Tax=Schizopora paradoxa TaxID=27342 RepID=A0A0H2S2L6_9HOMO	No hit	0	0	1	No hit	0	gnl|TC-DB|O43140|3.A.1.201.11 Multidrug resistance protein 1 OS=Cryptococcus neoformans GN=mdr1 PE=2 SV=1	77.4775
AF_DN54899_c0_g1	0	0	3.15793	Basidiomycota	Lipid A export ATP-binding/permease protein MsbA	UniRef90_A0A0H2S2L6 p-loop containing nucleoside triphosphate hydrolase protein n=1 Tax=Schizopora paradoxa TaxID=27342 RepID=A0A0H2S2L6_9HOMO	No hit	0	0	1	No hit	0	gnl|TC-DB|O43140|3.A.1.201.11 Multidrug resistance protein 1 OS=Cryptococcus neoformans GN=mdr1 PE=2 SV=1	88.5057
AF_DN29570_c0_g1	0	0	3.153	Ascomycota	NA	UniRef90_A0A178AM81 Uncharacterized protein n=1 Tax=Stagonospora sp. SRC1lsM3a TaxID=765868 RepID=A0A178AM81_9PLEO	No hit	0	0	1	No hit	0
AF_DN74406_c0_g1	0	0.0218347	3.15102	Ascomycota	NA	UniRef90_K8APR3 Uncharacterized protein n=1 Tax=Cronobacter muytjensii 530 TaxID=1208586 RepID=K8APR3_9ENTR	No hit	0	0.0151735	0.999885	No hit	0
AF_DN77542_c0_g1	0	0	3.14952	Ascomycota	NA	UniRef90_A0A177CYK7 Uncharacterized protein n=1 Tax=Paraphaeosphaeria sporulosa TaxID=1460663 RepID=A0A177CYK7_9PLEO	No hit	0	0	1	No hit	0
AF_DN104378_c0_g1	0	0	3.14816	Ascomycota	NA	No hits	No hit	0	0	1	No hit	0
AF_DN85477_c0_g1	0	0	3.14742	Basidiomycota	NA	UniRef90_A0A0H2RPB2 Glycosyltransferase family 2 protein n=1 Tax=Schizopora paradoxa TaxID=27342 RepID=A0A0H2RPB2_9HOMO	No hit	0	0	1	No hit	0
AF_DN1363_c0_g1	0	0	3.14727	Basidiomycota	Heat shock 70 kDa cognate-like protein (Fragment)	UniRef90_A0A0H2S4Q8 Heat shock protein 70 n=1 Tax=Schizopora paradoxa TaxID=27342 RepID=A0A0H2S4Q8_9HOMO	Hsp70	0	0	1	No hit	0	gnl|TC-DB|P08107|1.A.33.1.3 Heat shock 70 kDa protein 1 (HSP70.1) (HSP70-1/HSP70-2) - Homo sapiens (Human).	84.466
AF_DN36566_c0_g1	0	0.00268262	3.14614	Ascomycota	Circadian rhythm	UniRef90_A0A177C9P8 Uncharacterized protein n=1 Tax=Paraphaeosphaeria sporulosa TaxID=1460663 RepID=A0A177C9P8_9PLEO	No hit	0	0.00188375	0.999998	No hit	0
AF_DN15884_c0_g1	0	0	3.146	Ascomycota	Putative glycosyl transferase family 2	UniRef90_A0A2H3IKX2 Uncharacterized protein n=1 Tax=Penicillium occitanis TaxID=290292 RepID=A0A2H3IKX2_9EURO	No hit	0	0	1	No hit	0
AF_DN11876_c0_g1	0	0	3.1414	Ascomycota	Mitochondrial cytochrome c	UniRef90_Q41346 Cytochrome c n=4 Tax=Eukaryota TaxID=2759 RepID=CYC_STELP	No hit	0	0	1	No hit	0
AF_DN76021_c0_g1	0	0	3.14002	Ascomycota	NA	UniRef90_B8M4R0 Catalase n=4 Tax=Eurotiales TaxID=5042 RepID=B8M4R0_TALSN	No hit	0	0	1	No hit	0
AF_DN57342_c0_g1	0	0	3.13717	Ascomycota	Blue light-inducible protein Bli-3	UniRef90_B6QBC1 Blue light-inducible protein Bli-3 n=2 Tax=Eurotiales TaxID=5042 RepID=B6QBC1_TALMQ	No hit	0	0	1	No hit	0
AF_DN82092_c0_g1	0	0	3.13504	Basidiomycota	NA	UniRef90_A0A0H2RZU7 Uncharacterized protein n=1 Tax=Schizopora paradoxa TaxID=27342 RepID=A0A0H2RZU7_9HOMO	No hit	0	0	1	No hit	0
AF_DN5243_c0_g1	0	0.0062871	3.1349	Basidiomycota	NADPH--cytochrome P450 reductase	UniRef90_A0A0H2S6F2 NADPH--cytochrome P450 reductase n=1 Tax=Schizopora paradoxa TaxID=27342 RepID=A0A0H2S6F2_9HOMO	No hit	0	0.0044153	0.99999	No hit	0
AF_DN64171_c0_g1	0	0	3.13347	Ascomycota	NA	UniRef90_B6QE59 Uncharacterized protein n=4 Tax=Eurotiales TaxID=5042 RepID=B6QE59_TALMQ	No hit	0	0	1	No hit	0
AF_DN103263_c0_g1	0	0	3.13305	Basidiomycota	Chitin synthase-domain-containing protein (Fragment)	UniRef90_A0A165DDT9 Chitin synthase n=1 Tax=Exidia glandulosa HHB12029 TaxID=1314781 RepID=A0A165DDT9_EXIGL	No hit	0	0	1	GT2(9)	0
AF_DN14908_c0_g1	0	0	3.13089	Ascomycota	Elongation factor 3	UniRef90_A0A0G2ELB0 Putative elongation factor 3 n=1 Tax=Phaeomoniella chlamydospora TaxID=158046 RepID=A0A0G2ELB0_9EURO	No hit	0	0	1	No hit	0
AF_DN4752_c0_g1	0	0.0080246	3.13017	Basidiomycota	MFS general substrate transporter	UniRef90_G4TGF9 Probable DHA14-like major facilitator ABC transporter n=1 Tax=Serendipita indica (strain DSM 11827) TaxID=1109443 RepID=G4TGF9_SERID	No hit	0	0.00563516	0.999984	No hit	0
AF_DN56618_c0_g1	0	0.00559923	3.12873	Ascomycota	NA	UniRef90_A0A0G2EQT5 Putative abc bile acid transporter n=1 Tax=Phaeomoniella chlamydospora TaxID=158046 RepID=A0A0G2EQT5_9EURO	No hit	0	0.00393772	0.999992	No hit	0
AF_DN86270_c0_g1	0	0.0342697	3.12855	Basidiomycota	Inorganic phosphate transporter	UniRef90_A0A165PY18 Inorganic phosphate transporter n=1 Tax=Exidia glandulosa HHB12029 TaxID=1314781 RepID=A0A165PY18_EXIGL	No hit	0	0.0237573	0.999718	No hit	0
AF_DN94570_c0_g1	0	0	3.12789	Ascomycota	Aromatic compound dioxygenase	UniRef90_A0A1Y2A424 Intradiol ring-cleavage dioxygenase n=1 Tax=Clohesyomyces aquaticus TaxID=1231657 RepID=A0A1Y2A424_9PLEO	No hit	0	0	1	No hit	0
AF_DN8070_c0_g1	0	0	3.12645	Basidiomycota	NA	UniRef90_A0A067TLL0 Uncharacterized protein n=1 Tax=Galerina marginata (strain CBS 339.88) TaxID=685588 RepID=A0A067TLL0_GALM3	No hit	0	0	1	No hit	0
AF_DN88850_c0_g1	0	0.029513	3.1251	Ascomycota	NA	UniRef90_A0A178ATR9 Uncharacterized protein n=1 Tax=Stagonospora sp. SRC1lsM3a TaxID=765868 RepID=A0A178ATR9_9PLEO	No hit	0	0.0205208	0.999789	No hit	0
AF_DN64959_c0_g1	0	0	3.12349	Ascomycota	Serine/threonine-protein kinase hal4	UniRef90_E5ABM1 Uncharacterized protein n=1 Tax=Leptosphaeria maculans (strain JN3 / isolate v23.1.3 / race Av1-4-5-6-7-8)TaxID=985895 RepID=E5ABM1_LEPMJ	No hit	0	0	1	No hit	0
AF_DN103136_c0_g1	0	0	3.1219	Basidiomycota	NA	UniRef90_A0A067Q1L9 Uncharacterized protein n=1 Tax=Jaapia argillacea MUCL 33604 TaxID=933084 RepID=A0A067Q1L9_9HOMO	No hit	0	0	1	No hit	0
AF_DN56917_c0_g1	0	0	3.1211	Ascomycota	Bacilysin biosynthesis oxidoreductase bacC	UniRef90_A0A225AHW3 Uncharacterized protein n=2 Tax=Eurotiales TaxID=5042 RepID=A0A225AHW3_9EURO	No hit	0	0	1	No hit	0
AF_DN18256_c1_g1	0	0	3.12101	Ascomycota	Autophagy-related protein 8	UniRef90_A0A2L2U2U0 Autophagy-related protein n=1 Tax=Fusarium venenatum TaxID=56646 RepID=A0A2L2U2U0_9HYPO	No hit	0	0	1	No hit	0	gnl|TC-DB|A8MS84|9.A.15.3.1 Autophagy-related protein OS=Arabidopsis thaliana GN=APG8A PE=3 SV=1	80
AF_DN28446_c0_g1	0	0	3.11891	Ascomycota	NA	UniRef90_A0A1W5D8B2 Uncharacterized protein n=1 Tax=Umbilicaria pustulata TaxID=136370 RepID=A0A1W5D8B2_9LECA	No hit	0	0	1	No hit	0
AF_DN24214_c0_g1	0	0	3.11825	Basidiomycota	NA	UniRef90_J0LJF1 Uncharacterized protein n=1 Tax=Auricularia subglabra (strain TFB-10046 / SS5) TaxID=717982 RepID=J0LJF1_AURST	No hit	0	0	1	No hit	0
AF_DN73012_c0_g1	0	0	3.11798	Ascomycota	NA	UniRef90_A0A225AU38 Uncharacterized protein n=1 Tax=Talaromyces atroroseus TaxID=1441469 RepID=A0A225AU38_9EURO	DnaJ	0	0	1	No hit	0
AF_DN93429_c0_g1	0	0	3.11595	Basidiomycota	NA	UniRef90_A0A067SXG5 Uncharacterized protein n=1 Tax=Galerina marginata (strain CBS 339.88) TaxID=685588 RepID=A0A067SXG5_GALM3	Hsp70	0	0	1	No hit	0	gnl|TC-DB|Q02028|3.A.9.1.1 Stromal 70 kDa heat shock-related protein, chloroplast precursor - Pisum sativum (Garden pea).	72.1739
AF_DN25470_c0_g1	0	0	3.1143	Basidiomycota	Eukaryotic adp atp carrier	UniRef90_A0A0H2RVA8 Mitochondrial carrier n=1 Tax=Schizopora paradoxa TaxID=27342 RepID=A0A0H2RVA8_9HOMO	No hit	0	0	1	No hit	0	gnl|TC-DB|P18239|2.A.29.1.7 ADP,ATP carrier protein 2 - Saccharomyces cerevisiae (Baker's yeast).	72.2892
AF_DN84101_c0_g1	0	0	3.11075	Ascomycota	NA	UniRef90_A0A1Y1ZUD1 Uncharacterized protein n=1 Tax=Clohesyomyces aquaticus TaxID=1231657 RepID=A0A1Y1ZUD1_9PLEO	No hit	0	0	1	No hit	0
AF_DN16549_c0_g1	0	0	3.1036	Ascomycota	Hsp90 binding co-chaperone	UniRef90_B8MBP3 Hsp90 binding co-chaperone (Sba1), putative n=2 Tax=Talaromyces stipitatus (strain ATCC 10500 / CBS 375.48/ QM 6759 / NRRL 1006) TaxID=441959 RepID=B8MBP3_TALSN	No hit	0	0	1	No hit	0
AF_DN12197_c0_g1	0	0.0330478	3.10329	Ascomycota	40S ribosomal protein S26	UniRef90_A0A2P4I8K4 40S ribosomal protein S26 n=2 Tax=Quercus suber TaxID=58331 RepID=A0A2P4I8K4_QUESU	No hit	0	0.0230239	0.999735	No hit	0
AF_DN105820_c0_g1	0	0	3.09878	Ascomycota	NA	UniRef90_A0A178ASW6 Cytochrome P450 n=1 Tax=Stagonospora sp. SRC1lsM3a TaxID=765868 RepID=A0A178ASW6_9PLEO	No hit	0	0	1	No hit	0
AF_DN64326_c0_g1	0	0	3.09807	Ascomycota	NA	UniRef90_A0A225AVP5 Uncharacterized protein n=1 Tax=Talaromyces atroroseus TaxID=1441469 RepID=A0A225AVP5_9EURO	No hit	0	0	1	No hit	0
AF_DN95252_c0_g1	0	0	3.09655	Basidiomycota	Elongation factor 1 beta delta chain	UniRef90_A0A2A9NMF3 Uncharacterized protein n=1 Tax=Amanita thiersii Skay4041 TaxID=703135 RepID=A0A2A9NMF3_9AGAR	No hit	0	0	1	No hit	0
AF_DN13060_c0_g1	0	0	3.09569	Basidiomycota	NA	UniRef90_A0A1J3DHJ8 Uncharacterized protein (Fragment) n=3 Tax=Noccaea caerulescens TaxID=107243 RepID=A0A1J3DHJ8_NOCCA	No hit	0	0	1	No hit	0
AF_DN59872_c0_g1	0	0	3.09361	Ascomycota	NA	No hits	No hit	0	0	1	No hit	0
AF_DN36019_c0_g2	0	0	3.09027	Ascomycota	Intradiol ring-cleavage dioxygenase	UniRef90_A0A1Y2A424 Intradiol ring-cleavage dioxygenase n=1 Tax=Clohesyomyces aquaticus TaxID=1231657 RepID=A0A1Y2A424_9PLEO	No hit	0	0	1	No hit	0
AF_DN79377_c0_g1	0	0	3.08632	Asco or Basidio	Conidiation-specific protein 6	No hits	No hit	0	0	1	No hit	0
AF_DN12193_c0_g1	0	0	3.08286	Ascomycota	NA	UniRef90_W2RZV0 Uncharacterized protein n=1 Tax=Cyphellophora europaea CBS 101466 TaxID=1220924 RepID=W2RZV0_9EURO	No hit	0	0	1	No hit	0
AF_DN66671_c0_g1	0	0.094053	3.08273	No hit found	NA	No hits	No hit	0	0.0637677	0.997965	No hit	0
AF_DN12693_c0_g1	0	0	3.08056	Basidiomycota	Immunoreactive mannoprotein MP88	UniRef90_A0A151VXB5 Uncharacterized protein n=1 Tax=Hypsizygus marmoreus TaxID=39966 RepID=A0A151VXB5_HYPMA	No hit	0	0	1	No hit	0
AF_DN29991_c0_g1	0	0	3.0799	Ascomycota	NA	UniRef90_R7YP62 Elongation factor 3 n=1 Tax=Coniosporium apollinis (strain CBS 100218) TaxID=1168221 RepID=R7YP62_CONA1	No hit	0	0	1	No hit	0
AF_DN69572_c0_g1	0	0.0524777	3.07749	Basidiomycota	NA	UniRef90_G4TL16 Probable heat shock protein HSP104 (Endopeptidase Clp ATP-binding chain HSP104) n=1 Tax=Serendipita indica(strain DSM 11827) TaxID=1109443 RepID=G4TL16_SERID	Hsp100	0	0.0363671	0.999338	No hit	0	gnl|TC-DB|Q9SXJ7|3.A.9.1.2 Chaperone protein ClpC2, chloroplastic OS=Arabidopsis thaliana GN=CLPC2 PE=2 SV=1	79.8246
AF_DN71612_c0_g1	0	0	3.07696	Basidiomycota	NA	No hits	No hit	0	0	1	No hit	0
AF_DN65451_c0_g1	0	0.180926	3.07689	Basidiomycota	NA	UniRef90_A0A166K5Q8 NAD(P)-binding protein n=1 Tax=Fibularhizoctonia sp. CBS 109695 TaxID=436010 RepID=A0A166K5Q8_9HOMO	No hit	0	0.117514	0.993071	No hit	0
AF_DN95403_c0_g1	0	0	3.07245	Basidiomycota	Mannitol-1-phosphate dehydrogenase (Fragment)	UniRef90_A0A0H2RN68 Mannitol-1-phosphate dehydrogenase n=1 Tax=Schizopora paradoxa TaxID=27342 RepID=A0A0H2RN68_9HOMO	No hit	0	0	1	No hit	0
AF_DN24545_c0_g1	0	0.0113413	3.07035	Ascomycota	NA	UniRef90_W2RVN0 Uncharacterized protein n=1 Tax=Cyphellophora europaea CBS 101466 TaxID=1220924 RepID=W2RVN0_9EURO	No hit	0	0.00803371	0.999968	No hit	0
AF_DN22629_c0_g1	0	0	3.06675	Ascomycota	NA	UniRef90_A0A2L2THH9 Uncharacterized protein n=1 Tax=Fusarium venenatum TaxID=56646 RepID=A0A2L2THH9_9HYPO	No hit	0	0	1	No hit	0
AF_DN95944_c0_g1	0	0	3.06327	Ascomycota	NA	UniRef90_A0A1Y1YAV2 Transcription factor PAP1 (Fragment) n=1 Tax=Clohesyomyces aquaticus TaxID=1231657 RepID=A0A1Y1YAV2_9PLEO	No hit	0	0	1	No hit	0
AF_DN43821_c0_g1	0	0	3.06286	Ascomycota	NA	UniRef90_A0A177CIE6 Uncharacterized protein n=1 Tax=Paraphaeosphaeria sporulosa TaxID=1460663 RepID=A0A177CIE6_9PLEO	No hit	0	0	1	No hit	0
AF_DN75709_c0_g1	0	0.0435083	3.06044	Basidiomycota	Heat shock protein 90	UniRef90_A8NH85 Heat shock protein 90 n=1 Tax=Coprinopsis cinerea (strain Okayama-7 / 130 / ATCC MYA-4618 / FGSC 9003) TaxID=240176 RepID=A8NH85_COPC7	Hsp90	0	0.0303782	0.999538	No hit	0	gnl|TC-DB|P08238|8.A.163.1.1 Heat shock protein HSP 90-beta OS=Homo sapiens OX=9606 GN=HSP90AB1 PE=1 SV=4	72.549
AF_DN38634_c0_g1	0	0	3.05946	Ascomycota	Cutinase G-box binding	UniRef90_A0A178BD11 Uncharacterized protein n=1 Tax=Stagonospora sp. SRC1lsM3a TaxID=765868 RepID=A0A178BD11_9PLEO	No hit	0	0	1	No hit	0
AF_DN17108_c0_g1	0	0.00935763	3.05891	Basidiomycota	NA	UniRef90_A0A0H2RHV1 Uncharacterized protein n=1 Tax=Schizopora paradoxa TaxID=27342 RepID=A0A0H2RHV1_9HOMO	No hit	0	0.00664845	0.999978	No hit	0
AF_DN97831_c0_g1	0	0	3.05633	Ascomycota	Inorganic phosphate transporter	UniRef90_B8LXQ2 Phosphate transporter (Pho88), putative n=5 Tax=Eurotiales TaxID=5042 RepID=B8LXQ2_TALSN	No hit	0	0	1	No hit	0
AF_DN100968_c0_g1	0	0.066543	3.05517	Ascomycota	TATA-box binding protein (Fragment)	UniRef90_E4ZSJ9 Similar to transcription initiation factor TFIID n=17 Tax=Pleosporales TaxID=92860 RepID=E4ZSJ9_LEPMJ	No hit	0	0.0459677	0.998943	No hit	0
AF_DN37241_c0_g1	0	0	3.05272	Ascomycota	NA	UniRef90_W2S3N7 Chaperone DnaJ n=1 Tax=Cyphellophora europaea CBS 101466 TaxID=1220924 RepID=W2S3N7_9EURO	DnaJ	0	0	1	No hit	0
AF_DN95849_c0_g1	0	0	3.04936	Ascomycota	NA	UniRef90_A0A0D2JR69 Uncharacterized protein n=15 Tax=Herpotrichiellaceae TaxID=43219 RepID=A0A0D2JR69_9EURO	No hit	0	0	1	No hit	0
AF_DN36148_c0_g1	0	0.0126857	3.04628	Basidiomycota	Alcohol dehydrogenase	UniRef90_A0A067TTK8 Uncharacterized protein n=1 Tax=Galerina marginata (strain CBS 339.88) TaxID=685588 RepID=A0A067TTK8_GALM3	No hit	0	0.00901805	0.999959	No hit	0
AF_DN298_c0_g1	0	0	3.04243	Ascomycota	Heat-shock protein (Eurofung)	UniRef90_A0A1Y2WIN9 Uncharacterized protein n=1 Tax=Hypoxylon sp. CI-4A TaxID=1001833 RepID=A0A1Y2WIN9_9PEZI	ACD	0	0	1	No hit	0
AF_DN83514_c0_g1	0	0	3.04105	Ascomycota	NA	UniRef90_A0A1Y1YNJ4 Uncharacterized protein n=1 Tax=Clohesyomyces aquaticus TaxID=1231657 RepID=A0A1Y1YNJ4_9PLEO	No hit	0	0	1	No hit	0
AF_DN4938_c0_g1	0	0.00705203	3.04052	No hit found	NA	No hits	No hit	0	0.00503246	0.999987	No hit	0
AF_DN101839_c0_g1	0	0	3.04011	Ascomycota	NA	UniRef90_A0A1Y1ZF07 Uncharacterized protein n=1 Tax=Clohesyomyces aquaticus TaxID=1231657 RepID=A0A1Y1ZF07_9PLEO	No hit	0	0	1	No hit	0
AF_DN55831_c0_g1	0	0	3.03953	Basidiomycota	NA	UniRef90_A0A0D2LA32 Isocitrate lyase n=1 Tax=Hypholoma sublateritium FD-334 SS-4 TaxID=945553 RepID=A0A0D2LA32_9AGAR	No hit	0	0	1	No hit	0
AF_DN4525_c0_g1	0	0	3.03908	Ascomycota	NA	UniRef90_B8MIV4 Translation elongation factor eEF-3, putative n=6 Tax=Eurotiales TaxID=5042 RepID=B8MIV4_TALSN	No hit	0	0	1	No hit	0
AF_DN100178_c0_g1	0	0	3.03775	Ascomycota	Putative short chain dehydrogenase	UniRef90_A0A225ANI3 Uncharacterized protein n=1 Tax=Talaromyces atroroseus TaxID=1441469 RepID=A0A225ANI3_9EURO	No hit	0	0	1	No hit	0
AF_DN8115_c0_g1	0	0	3.03644	Ascomycota	NA	UniRef90_A0A1Y1ZUD1 Uncharacterized protein n=1 Tax=Clohesyomyces aquaticus TaxID=1231657 RepID=A0A1Y1ZUD1_9PLEO	No hit	0	0	1	No hit	0
AF_DN65115_c0_g1	0	0	3.03624	Ascomycota	Heat shock protein 30 (Fragment)	UniRef90_A0A1C1CDF6 30 kDa heat shock protein n=3 Tax=Cladophialophora TaxID=82105 RepID=A0A1C1CDF6_9EURO	ACD	0	0	1	No hit	0
AF_DN94147_c0_g1	0	0.0450543	3.03419	Basidiomycota	NA	UniRef90_A0A0H2S719 Pkinase-domain-containing protein n=1 Tax=Schizopora paradoxa TaxID=27342 RepID=A0A0H2S719_9HOMO	No hit	0	0.0315792	0.999501	No hit	0
AF_DN56148_c0_g1	0	0	3.03324	Ascomycota	RNP domain protein (Fragment)	UniRef90_A0A0D6QXV2 Uncharacterized protein n=1 Tax=Araucaria cunninghamii TaxID=56994 RepID=A0A0D6QXV2_ARACU	No hit	0	0	1	No hit	0
AF_DN101148_c0_g1	0	0	3.03279	Ascomycota	Glucanase	UniRef90_A0A1Y2A4Z1 Glucanase n=1 Tax=Clohesyomyces aquaticus TaxID=1231657 RepID=A0A1Y2A4Z1_9PLEO	No hit	0	0	1	GH6(1-139)	0
AF_DN95231_c0_g1	0	0	3.02909	Ascomycota	NA	UniRef90_A0A225AS91 Uncharacterized protein n=1 Tax=Talaromyces atroroseus TaxID=1441469 RepID=A0A225AS91_9EURO	No hit	0	0	1	No hit	0
AF_DN100810_c0_g1	0	0	3.02871	Basidiomycota	NA	UniRef90_A0A165L156 Plasma membrane ATPase n=2 Tax=Auriculariales TaxID=5226 RepID=A0A165L156_EXIGL	No hit	0	0	1	No hit	0
AF_DN76800_c0_g1	0	0	3.02672	Ascomycota	NA	UniRef90_A0A1Q5QC47 Uncharacterized protein n=1 Tax=Talaromyces atroroseus TaxID=1441469 RepID=A0A1Q5QC47_9EURO	No hit	0	0	1	No hit	0
AF_DN103915_c0_g1	0	0	3.0252	Ascomycota	NA	UniRef90_V9DP87 Methylmalonate-semialdehyde dehydrogenase (Acylating) n=17 Tax=Herpotrichiellaceae TaxID=43219 RepID=V9DP87_9EURO	No hit	0	0	1	No hit	0
AF_DN55924_c0_g1	0	0	3.02464	Basidiomycota	NA	UniRef90_A0A0C9XUN4 Unplaced genomic scaffold K443scaffold_6, whole genome shotgun sequence n=1 Tax=Laccaria amethystina LaAM-08-1 TaxID=1095629 RepID=A0A0C9XUN4_9AGAR	No hit	0	0	1	No hit	0
AF_DN93208_c0_g1	0	0	3.02407	Ascomycota	Putative rna-binding protein fus tls	UniRef90_W2S7M1 Uncharacterized protein n=1 Tax=Cyphellophora europaea CBS 101466 TaxID=1220924 RepID=W2S7M1_9EURO	No hit	0	0	1	No hit	0
AF_DN84775_c0_g1	0	0	3.02252	No hit found	NA	No hits	No hit	0	0	1	No hit	0
AF_DN57257_c0_g1	0	0	3.02093	Ascomycota	NA	UniRef90_A0A1Q5QAF0 Uncharacterized protein n=1 Tax=Talaromyces atroroseus TaxID=1441469 RepID=A0A1Q5QAF0_9EURO	No hit	0	0	1	No hit	0
AF_DN86788_c0_g1	0	0	3.0201	Ascomycota	GTP-binding nuclear protein (Fragment)	UniRef90_A0A2H3ELB8 GTP-binding nuclear protein n=1 Tax=Diplocarpon rosae TaxID=946125 RepID=A0A2H3ELB8_9HELO	No hit	0	0	1	No hit	0	gnl|TC-DB|P32835|9.A.50.1.1 GTP-binding nuclear protein GSP1/CNR1 OS=Saccharomyces cerevisiae GN=GSP1 PE=1 SV=1	95.5882
AF_DN54669_c0_g1	0	0	3.01981	Ascomycota	ADA HAT complex component 1	UniRef90_A0A225ANU5 Uncharacterized protein n=1 Tax=Talaromyces atroroseus TaxID=1441469 RepID=A0A225ANU5_9EURO	No hit	0	0	1	No hit	0
AF_DN12278_c0_g1	0	0	3.01945	Ascomycota	NA	UniRef90_A0A1Y1ZNC6 Uncharacterized protein n=1 Tax=Clohesyomyces aquaticus TaxID=1231657 RepID=A0A1Y1ZNC6_9PLEO	No hit	0	0	1	No hit	0
AF_DN45149_c0_g1	0	0	3.01931	Ascomycota	BTB POZ fold domain containing	UniRef90_G2R0K8 Uncharacterized protein n=1 Tax=Thielavia terrestris (strain ATCC 38088 / NRRL 8126) TaxID=578455 RepID=G2R0K8_THITE	No hit	0	0	1	No hit	0
AF_DN18243_c0_g1	0	0	3.01919	Ascomycota	NA	No hits	No hit	0	0	1	No hit	0
AF_DN91908_c0_g1	0	0	3.01512	Ascomycota	Mitochondrial hypoxia responsive domain containing protein	UniRef90_A0A0G2E8P9 Putative mitochondrial hypoxia responsive domain containing protein n=2 Tax=Diplodia TaxID=66735 RepID=A0A0G2E8P9_9PEZI	No hit	0	0	1	No hit	0
AF_DN97280_c0_g1	0	0	3.0146	Ascomycota	NA	UniRef90_A0A1Y1YSW1 F-box/WD repeat-containing protein lin-23 n=1 Tax=Clohesyomyces aquaticus TaxID=1231657 RepID=A0A1Y1YSW1_9PLEO	No hit	0	0	1	No hit	0
AF_DN76162_c0_g1	0	0	3.01458	Ascomycota	NA	UniRef90_A0A0L0NF04 Uncharacterized protein n=1 Tax=Tolypocladium ophioglossoides CBS 100239 TaxID=1163406 RepID=A0A0L0NF04_9HYPO	No hit	0	0	1	No hit	0
AF_DN23662_c0_g1	0	0	3.01262	Basidiomycota	NA	No hits	No hit	0	0	1	No hit	0
AF_DN103792_c0_g1	0	0	3.01001	Ascomycota	NA	No hits	No hit	0	0	1	No hit	0
AF_DN64627_c0_g1	0	0	3.00973	Ascomycota	NA	UniRef90_A0A1Y1YYB8 PUA-like domain-containing protein n=1 Tax=Clohesyomyces aquaticus TaxID=1231657 RepID=A0A1Y1YYB8_9PLEO	No hit	0	0	1	No hit	0
AF_DN97575_c0_g1	0	0	3.00844	Ascomycota	NA	UniRef90_A0A177CZ74 Cutinase transcription factor 1 alpha n=1 Tax=Paraphaeosphaeria sporulosa TaxID=1460663 RepID=A0A177CZ74_9PLEO	No hit	0	0	1	No hit	0
AF_DN35125_c0_g1	0	0	3.00596	Ascomycota	NA	UniRef90_H6C2Q6 Elongation factor EF-3 n=16 Tax=Herpotrichiellaceae TaxID=43219 RepID=H6C2Q6_EXODN	No hit	0	0	1	No hit	0
AF_DN58687_c0_g1	0	0	3.00595	Basidiomycota	NA	UniRef90_UPI00044079E4 kinase-like protein n=1 Tax=Fomitiporia mediterranea (strain MF3/22) TaxID=694068 RepID=UPI00044079E4	No hit	0	0	1	No hit	SP(Sec/SPI)
AF_DN104259_c0_g1	0	0	3.00374	Basidiomycota	NA	No hits	No hit	0	0	1	No hit	0
AF_DN57263_c0_g1	0	0.0626493	3.00373	No hit found	NA	UniRef90_A0A0H2RQR4 Uncharacterized protein n=1 Tax=Schizopora paradoxa TaxID=27342 RepID=A0A0H2RQR4_9HOMO	No hit	0	0.0437614	0.999042	No hit	0
AF_DN13039_c0_g1	0	0	2.995	No hit found	NA	UniRef90_A0A0C3BY11 Uncharacterized protein n=1 Tax=Hebeloma cylindrosporum h7 TaxID=686832 RepID=A0A0C3BY11_HEBCY	No hit	0	0	1	No hit	0
AF_DN96876_c0_g1	0	0	2.9936	Asco or Basidio	NA	UniRef90_A0A0H2RGU0 NAD binding Rossmann fold oxidoreductase n=1 Tax=Schizopora paradoxa TaxID=27342 RepID=A0A0H2RGU0_9HOMO	No hit	0	0	1	No hit	0
AF_DN2544_c0_g1	0	0	2.99295	Basidiomycota	NA	No hits	No hit	0	0	1	No hit	0
AF_DN56907_c0_g1	0	0.0163355	2.99162	Ascomycota	NA	UniRef90_A0A1Y1YNL2 Uncharacterized protein n=1 Tax=Clohesyomyces aquaticus TaxID=1231657 RepID=A0A1Y1YNL2_9PLEO	No hit	0	0.0117053	0.999931	No hit	0
AF_DN32411_c0_g1	0	0.0204564	2.9896	Basidiomycota	NA	UniRef90_A0A165F3R2 Uncharacterized protein n=1 Tax=Exidia glandulosa HHB12029 TaxID=1314781 RepID=A0A165F3R2_EXIGL	No hit	0	0.0146332	0.999893	No hit	0
AF_DN101517_c0_g1	0	0	2.98772	Ascomycota	HMG-box variant	UniRef90_B6QB80 DUF1014 domain protein n=2 Tax=Talaromyces marneffei TaxID=37727 RepID=B6QB80_TALMQ	No hit	0	0	1	No hit	0
AF_DN74688_c0_g1	0	0	2.98293	Basidiomycota	NA	UniRef90_A0A0D2PH39 Uncharacterized protein n=1 Tax=Hypholoma sublateritium FD-334 SS-4 TaxID=945553 RepID=A0A0D2PH39_9AGAR	No hit	0	0	1	No hit	0
AF_DN67397_c0_g1	0	0	2.98187	Ascomycota	NA	UniRef90_A0A1Y1ZIH9 Armadillo-type protein n=1 Tax=Clohesyomyces aquaticus TaxID=1231657 RepID=A0A1Y1ZIH9_9PLEO	No hit	0	0	1	No hit	0
AF_DN60721_c0_g1	0	0	2.9807	Basidiomycota	NA	UniRef90_V2XHB5 Hesp-379-like protein n=2 Tax=Moniliophthora roreri TaxID=221103 RepID=V2XHB5_MONRO	No hit	0	0	1	No hit	0
AF_DN14197_c0_g1	0	0	2.97985	Ascomycota	NA	UniRef90_A0A072PGT1 Uncharacterized protein n=1 Tax=Exophiala aquamarina CBS 119918 TaxID=1182545 RepID=A0A072PGT1_9EURO	No hit	0	0	1	No hit	0
AF_DN35048_c0_g2	0	0	2.97724	Ascomycota	Response to stress	UniRef90_A0A1Y1ZM14 HSP20-like chaperone n=1 Tax=Clohesyomyces aquaticus TaxID=1231657 RepID=A0A1Y1ZM14_9PLEO	ACD	0	0	1	No hit	0
AF_DN81241_c0_g1	0	0	2.97577	Ascomycota	Cell surface protein, putative	UniRef90_A0A225AKB9 Uncharacterized protein n=1 Tax=Talaromyces atroroseus TaxID=1441469 RepID=A0A225AKB9_9EURO	No hit	0	0	1	No hit	0
AF_DN108848_c0_g1	0	0	2.97372	Ascomycota	Vesicle-associated membrane protein 4	UniRef90_A0A1J9PUD6 Uncharacterized protein n=1 Tax=Emergomyces pasteuriana Ep9510 TaxID=1447872 RepID=A0A1J9PUD6_9EURO	No hit	0	0	1	No hit	0
AF_DN25592_c0_g1	0	0	2.97146	Ascomycota	NA	No hits	No hit	0	0	1	No hit	0
AF_DN83841_c0_g1	0	0	2.97144	Ascomycota	NA	No hits	No hit	0	0	1	No hit	0
AF_DN71645_c0_g1	0	0	2.97047	Ascomycota	Glyceraldehyde-3-phosphate dehydrogenase, type I (Fragment)	UniRef90_A0A150VFD1 Glyceraldehyde-3-phosphate dehydrogenase n=1 Tax=Acidomyces richmondensis BFW TaxID=766039 RepID=A0A150VFD1_9PEZI	No hit	0	0	1	No hit	0	gnl|TC-DB|B3ET62|3.A.23.6.1 Glyceraldehyde-3-phosphate dehydrogenase OS=Amoebophilus asiaticus (strain 5a2) GN=Aasi_1069 PE=3 SV=1	71.6981
AF_DN65650_c0_g1	0	0.05835	2.96781	Ascomycota	NA	UniRef90_H6C2Q6 Elongation factor EF-3 n=16 Tax=Herpotrichiellaceae TaxID=43219 RepID=H6C2Q6_EXODN	No hit	0	0.0411134	0.999154	No hit	0
AF_DN19587_c0_g1	0	0	2.96644	Ascomycota	Fungal transcriptional regulatory protein, N-terminal	UniRef90_A0A163GTF4 Sequence-specific DNA binding RNA polymerase II transcription factor n=1 Tax=Didymella rabiei TaxID=5454 RepID=A0A163GTF4_DIDRA	No hit	0	0	1	No hit	0
AF_DN6204_c0_g1	0	0	2.9629	Ascomycota	Elongation factor 2	UniRef90_A0A0G2EG66 Putative elongation factor 2 n=1 Tax=Phaeomoniella chlamydospora TaxID=158046 RepID=A0A0G2EG66_9EURO	No hit	0	0	1	No hit	0
AF_DN18251_c0_g1	0	0	2.95843	Basidiomycota	Translation initiation factor SU	UniRef90_A0A067TPC9 Uncharacterized protein n=2 Tax=Agaricales TaxID=5338 RepID=A0A067TPC9_GALM3	No hit	0	0	1	No hit	0
AF_DN96048_c0_g1	0	0	2.95653	Ascomycota	NA	UniRef90_A0A178DQG9 Uncharacterized protein n=1 Tax=Pyrenochaeta sp. DS3sAY3a TaxID=765867 RepID=A0A178DQG9_9PLEO	No hit	0	0	1	No hit	0
AF_DN72607_c0_g1	0	0	2.95537	Basidiomycota	NA	UniRef90_A0A0C3CD62 Uncharacterized protein n=1 Tax=Hebeloma cylindrosporum h7 TaxID=686832 RepID=A0A0C3CD62_HEBCY	No hit	0	0	1	No hit	SP(Sec/SPI)
AF_DN4044_c0_g1	0	0.0693162	2.95521	Ascomycota	Pea pathogenicity protein 2	UniRef90_W2RLR0 Uncharacterized protein n=2 Tax=Chaetothyriales TaxID=34395 RepID=W2RLR0_9EURO	No hit	0	0.0486823	0.998814	No hit	0
AF_DN56136_c0_g1	0	0	2.95411	Ascomycota	NA	UniRef90_R1E8C8 Uncharacterized protein n=4 Tax=Botryosphaeriaceae TaxID=45131 RepID=R1E8C8_BOTPV	No hit	0	0	1	No hit	0
AF_DN101970_c0_g1	0	0	2.95348	Ascomycota	NA	UniRef90_A0A225B8L8 Uncharacterized protein n=1 Tax=Talaromyces atroroseus TaxID=1441469 RepID=A0A225B8L8_9EURO	No hit	0	0	1	No hit	0
AF_DN67268_c0_g1	0	0.00985447	2.94963	Ascomycota	Period circadian	UniRef90_G2QWM9 Uncharacterized protein n=1 Tax=Thielavia terrestris (strain ATCC 38088 / NRRL 8126) TaxID=578455 RepID=G2QWM9_THITE	No hit	0	0.00713878	0.999975	No hit	0
AF_DN80747_c0_g1	0	0	2.94826	Ascomycota	NA	UniRef90_A0A177BXT6 DUF1752-domain-containing protein n=1 Tax=Paraphaeosphaeria sporulosa TaxID=1460663 RepID=A0A177BXT6_9PLEO	No hit	0	0	1	No hit	0
AF_DN69620_c0_g1	0	0	2.94767	Ascomycota	NA	UniRef90_A0A177BU70 Zinc finger transcription factor ace1 n=1 Tax=Paraphaeosphaeria sporulosa TaxID=1460663 RepID=A0A177BU70_9PLEO	No hit	0	0	1	No hit	0
AF_DN30575_c0_g1	0	0	2.94656	No hit found	NA	UniRef90_A0A172T0U1 Movement protein n=2 Tax=unclassified Virgaviridae TaxID=1527522 RepID=A0A172T0U1_9VIRU	No hit	0	0	1	No hit	0
AF_DN92789_c0_g1	0	0	2.9445	Ascomycota	NA	UniRef90_A0A225AU24 Uncharacterized protein n=1 Tax=Talaromyces atroroseus TaxID=1441469 RepID=A0A225AU24_9EURO	No hit	0	0	1	No hit	0
AF_DN56713_c0_g1	0	0.042803	2.94026	Basidiomycota	NA	No hits	No hit	0	0.0305508	0.999533	No hit	0
AF_DN55439_c0_g1	0	0	2.93939	Basidiomycota	AAA-domain-containing protein	UniRef90_A0A0H2S4Y3 AAA ATPase n=2 Tax=Schizopora paradoxa TaxID=27342 RepID=A0A0H2S4Y3_9HOMO	No hit	0	0	1	No hit	0	gnl|TC-DB|P55072|3.A.16.1.1 Transitional endoplasmic reticulum ATPase (TER ATPase) (15S Mg(2+)- ATPase p97 subunit) (Valosin-containing protein) (VCP) - Homo sapiens (Human).	78.5425
AF_DN81127_c0_g1	0	0	2.93838	Ascomycota	Large subunit ribosomal protein L23Ae	UniRef90_R1G7S9 Putative 60s ribosomal protein l25 protein n=3 Tax=Botryosphaeriaceae TaxID=45131 RepID=R1G7S9_BOTPV	No hit	0	0	1	No hit	0
AF_DN56624_c0_g1	0	0	2.93755	Basidiomycota	NA	UniRef90_A0A0H2RIZ3 Ammonium transporter n=1 Tax=Schizopora paradoxa TaxID=27342 RepID=A0A0H2RIZ3_9HOMO	No hit	0	0	1	No hit	0	gnl|TC-DB|Q8NKD5|1.A.11.3.3 Ammonium transporter - Hebeloma cylindrosporum.	82
AF_DN90300_c0_g1	0	0	2.93169	Basidiomycota	Calreticulin/calnexin	UniRef90_A0A0H2RZC9 Calreticulin-domain-containing protein n=1 Tax=Schizopora paradoxa TaxID=27342 RepID=A0A0H2RZC9_9HOMO	No hit	0	0	1	No hit	0
AF_DN29632_c0_g1	0	0	2.93165	Ascomycota	Stress response protein Rds1	UniRef90_A0A1W5D8B2 Uncharacterized protein n=1 Tax=Umbilicaria pustulata TaxID=136370 RepID=A0A1W5D8B2_9LECA	No hit	0	0	1	No hit	0
AF_DN69547_c0_g1	0	0	2.9306	Ascomycota	NA	UniRef90_B8MAY1 Eukaryotic translation initiation factor 3 subunit C n=6 Tax=Eurotiales TaxID=5042 RepID=B8MAY1_TALSN	No hit	0	0	1	No hit	0
AF_DN75337_c0_g1	0	0.0130309	2.9298	Basidiomycota	NA	UniRef90_A0A165I411 Catalase n=1 Tax=Exidia glandulosa HHB12029 TaxID=1314781 RepID=A0A165I411_EXIGL	No hit	0	0.00945951	0.999955	No hit	0
AF_DN96455_c0_g1	0	0	2.92437	Basidiomycota	Cytochrome-c from the OXPHOS pathway	UniRef90_A0A0C2WZS4 Uncharacterized protein n=1 Tax=Amanita muscaria Koide BX008 TaxID=946122 RepID=A0A0C2WZS4_AMAMU	No hit	0	0	1	No hit	0
AF_DN85669_c0_g1	0	0	2.92433	Basidiomycota	Translationally controlled tumor-associated	UniRef90_A0A2R6NVL0 Uncharacterized protein n=1 Tax=Phlebia centrifuga TaxID=98765 RepID=A0A2R6NVL0_9APHY	No hit	0	0	1	No hit	0
AF_DN58582_c0_g1	0	0	2.92249	Ascomycota	GPI anchored serine-threonine rich protein	UniRef90_A0A1Y1ZPS4 Uncharacterized protein n=1 Tax=Clohesyomyces aquaticus TaxID=1231657 RepID=A0A1Y1ZPS4_9PLEO	No hit	0	0	1	No hit	SP(Sec/SPI)
AF_DN73331_c0_g1	0	0.0114901	2.91946	Ascomycota	Cross-pathway control protein A	UniRef90_W6YQ79 Uncharacterized protein n=4 Tax=Bipolaris TaxID=33194 RepID=W6YQ79_COCCA	No hit	0	0.00836352	0.999965	No hit	0
AF_DN33019_c0_g1	0	0.0105411	2.91867	Ascomycota	NA	UniRef90_Q2HEY3 Uncharacterized protein n=1 Tax=Chaetomium globosum (strain ATCC 6205 / CBS 148.51 / DSM 1962 / NBRC 6347/ NRRL 1970) TaxID=306901 RepID=Q2HEY3_CHAGB	No hit	0	0.00767754	0.999971	No hit	0
AF_DN94100_c0_g1	0	0	2.91703	Ascomycota	Autophagy-related protein 8	UniRef90_A0A2L2U2U0 Autophagy-related protein n=1 Tax=Fusarium venenatum TaxID=56646 RepID=A0A2L2U2U0_9HYPO	No hit	0	0	1	No hit	0	gnl|TC-DB|A8MS84|9.A.15.3.1 Autophagy-related protein OS=Arabidopsis thaliana GN=APG8A PE=3 SV=1	83.3333
AF_DN85814_c0_g1	0	0	2.91692	Ascomycota	Putative transcription factor sre2	UniRef90_A0A225BEA0 Uncharacterized protein n=1 Tax=Talaromyces atroroseus TaxID=1441469 RepID=A0A225BEA0_9EURO	No hit	0	0	1	No hit	0
AF_DN86733_c0_g1	0	0	2.91432	Basidiomycota	NA	UniRef90_A0A0D2MSK6 Uncharacterized protein n=1 Tax=Hypholoma sublateritium FD-334 SS-4 TaxID=945553 RepID=A0A0D2MSK6_9AGAR	No hit	0	0	1	No hit	SP(Sec/SPI)
AF_DN105304_c0_g1	0	0	2.91425	Basidiomycota	Vacuolar aspartic protease	UniRef90_A0A165QXF0 Asp-domain-containing protein n=1 Tax=Exidia glandulosa HHB12029 TaxID=1314781 RepID=A0A165QXF0_EXIGL	No hit	0	0	1	No hit	0
AF_DN21404_c0_g1	0	0	2.91389	Basidiomycota	NA	No hits	No hit	0	0	1	No hit	0
AF_DN75830_c0_g1	0	0	2.91328	Basidiomycota	Glucose-induced degradation protein 8	UniRef90_A0A0H2RRB0 Uncharacterized protein n=1 Tax=Schizopora paradoxa TaxID=27342 RepID=A0A0H2RRB0_9HOMO	No hit	0	0	1	No hit	0
AF_DN79540_c0_g1	0	0	2.91284	Basidiomycota	ATP synthase subunit alpha, mitochondrial	UniRef90_A0A165JA46 ATP synthase subunit alpha n=1 Tax=Exidia glandulosa HHB12029 TaxID=1314781 RepID=A0A165JA46_EXIGL	No hit	0	0	1	No hit	0	gnl|TC-DB|P07251|3.A.2.1.3 ATP synthase alpha chain, mitochondrial precursor (EC 3.6.1.34) - Saccharomyces cerevisiae (Baker's yeast).	79.5
AF_DN67985_c0_g1	0	0	2.91271	Ascomycota	GPI-anchored CFEM domain protein B	UniRef90_A0A163BHE1 Uncharacterized protein n=1 Tax=Didymella rabiei TaxID=5454 RepID=A0A163BHE1_DIDRA	No hit	0	0	1	No hit	SP(Sec/SPI)
AF_DN56127_c0_g1	0	0	2.91017	Ascomycota	NA	UniRef90_A0A2H3ICT4 CheY-like superfamily n=1 Tax=Penicillium occitanis TaxID=290292 RepID=A0A2H3ICT4_9EURO	No hit	0	0	1	No hit	0
AF_DN10106_c0_g1	0	0	2.90926	Ascomycota	Cross-pathway control protein A	UniRef90_A0A178AMZ6 Uncharacterized protein n=1 Tax=Stagonospora sp. SRC1lsM3a TaxID=765868 RepID=A0A178AMZ6_9PLEO	No hit	0	0	1	No hit	0
AF_DN33242_c0_g1	0	0.00497787	2.90715	Basidiomycota	MFS general substrate transporter	UniRef90_A0A165HI88 MFS general substrate transporter n=1 Tax=Exidia glandulosa HHB12029 TaxID=1314781 RepID=A0A165HI88_EXIGL	No hit	0	0.00364357	0.999993	No hit	0
AF_DN72388_c0_g1	0	0	2.90586	Basidiomycota	NA	UniRef90_A0A067TY36 Uncharacterized protein n=1 Tax=Galerina marginata (strain CBS 339.88) TaxID=685588 RepID=A0A067TY36_GALM3	No hit	0	0	1	No hit	0	gnl|TC-DB|CCA70369|5.B.1.1.10 probable NADPH oxidase heavy chain subunit [Serendipita indica DSM 11827]	90.099
AF_DN96998_c0_g1	0	0	2.90547	Ascomycota	Bacteriorhodopsin (Fragment)	UniRef90_B2AF43 Podospora anserina S mat+ genomic DNA chromosome 5, supercontig 1 n=1 Tax=Podospora anserina (strain S /ATCC MYA-4624 / DSM 980 / FGSC 10383) TaxID=515849 RepID=B2AF43_PODAN	No hit	0	0	1	No hit	0	gnl|TC-DB|Q9UW81|3.E.1.4.2 OPSIN-1 - Neurospora crassa.	83.6879
AF_DN32718_c0_g1	0	0.0185252	2.90498	Basidiomycota	NA	No hits	No hit	0	0.0134733	0.999909	No hit	0
AF_DN83272_c0_g1	0.0250047	0	2.90318	Ascomycota	NA	UniRef90_A0A175WAK3 Next to BRCA1 gene 1 protein n=1 Tax=Madurella mycetomatis TaxID=100816 RepID=A0A175WAK3_9PEZI	No hit	0.0181329	0	0.999836	No hit	0
AF_DN102604_c0_g1	0	0	2.90207	Ascomycota	NA	UniRef90_A0A1Y1ZUD1 Uncharacterized protein n=1 Tax=Clohesyomyces aquaticus TaxID=1231657 RepID=A0A1Y1ZUD1_9PLEO	No hit	0	0	1	No hit	0
AF_DN9669_c0_g1	0	0	2.90191	Basidiomycota	NA	UniRef90_A0A0D2L2A6 Uncharacterized protein n=3 Tax=Agaricales TaxID=5338 RepID=A0A0D2L2A6_9AGAR	No hit	0	0	1	No hit	0
AF_DN8522_c0_g1	0	0	2.90046	Ascomycota	NA	UniRef90_P83616 Endoplasmic reticulum chaperone BiP n=35 Tax=Aspergillaceae TaxID=1131492 RepID=BIP_ASPNG	Hsp70	0	0	1	No hit	0	gnl|TC-DB|P11021|1.A.33.1.5 78 kDa glucose-regulated protein OS=Homo sapiens GN=HSPA5 PE=1 SV=2	92.9134
AF_DN84320_c0_g1	0	0	2.89712	Basidiomycota	Alkali-sensitive linkage protein 1	UniRef90_A0A0C9YDH1 Unplaced genomic scaffold K443scaffold_7, whole genome shotgun sequence n=1 Tax=Laccaria amethystina LaAM-08-1 TaxID=1095629 RepID=A0A0C9YDH1_9AGAR	No hit	0	0	1	GH128(128-233)	SP(Sec/SPI)
AF_DN106000_c0_g1	0	0	2.89559	No hit found	NA	UniRef90_A0A0H2RYQ5 Uncharacterized protein n=1 Tax=Schizopora paradoxa TaxID=27342 RepID=A0A0H2RYQ5_9HOMO	No hit	0	0	1	No hit	0
AF_DN15864_c0_g1	0	0	2.89272	Ascomycota	MFS general substrate transporter	UniRef90_A0A1Y1ZXL7 Major facilitator superfamily domain-containing protein n=1 Tax=Clohesyomyces aquaticus TaxID=1231657 RepID=A0A1Y1ZXL7_9PLEO	No hit	0	0	1	No hit	0
AF_DN54699_c0_g1	0	0	2.89151	Ascomycota	NA	UniRef90_A0A1Y1Z5K0 POT family-domain-containing protein n=1 Tax=Clohesyomyces aquaticus TaxID=1231657 RepID=A0A1Y1Z5K0_9PLEO	No hit	0	0	1	No hit	0
AF_DN80218_c0_g1	0	0	2.88848	Basidiomycota	NA	UniRef90_M2R5U2 Uncharacterized protein n=1 Tax=Ceriporiopsis subvermispora (strain B) TaxID=914234 RepID=M2R5U2_CERS8	No hit	0	0	1	No hit	0
AF_DN1942_c0_g1	0	0	2.88825	Basidiomycota	Mitochondrial phosphate carrier protein 2, mitochondrial	UniRef90_A0A2A9NVV4 Uncharacterized protein n=1 Tax=Amanita thiersii Skay4041 TaxID=703135 RepID=A0A2A9NVV4_9AGAR	No hit	0	0	1	No hit	0
AF_DN92357_c0_g1	0	0	2.8875	Ascomycota	NA	UniRef90_A0A225AZ42 Uncharacterized protein n=1 Tax=Talaromyces atroroseus TaxID=1441469 RepID=A0A225AZ42_9EURO	No hit	0	0	1	No hit	0
AF_DN69534_c0_g1	0	0	2.88572	Ascomycota	NA	UniRef90_M3BAG7 Uncharacterized protein n=1 Tax=Pseudocercospora fijiensis (strain CIRAD86) TaxID=383855 RepID=M3BAG7_PSEFD	Hsp100	0	0	1	No hit	0
AF_DN36838_c0_g1	0	0.0147488	2.88363	No hit found	NA	No hits	No hit	0	0.0107905	0.999942	No hit	SP(Sec/SPI)
AF_DN92688_c0_g1	0	0	2.88343	Basidiomycota	NA	UniRef90_A8NFL4 Uncharacterized protein n=1 Tax=Coprinopsis cinerea (strain Okayama-7 / 130 / ATCC MYA-4618 / FGSC 9003)TaxID=240176 RepID=A8NFL4_COPC7	No hit	0	0	1	No hit	0
AF_DN27478_c0_g1	0	0	2.88147	Basidiomycota	NA	No hits	No hit	0	0	1	No hit	0
AF_DN75903_c0_g1	0	0	2.87971	Ascomycota	NA	UniRef90_W2SAF7 Catalase n=1 Tax=Cyphellophora europaea CBS 101466 TaxID=1220924 RepID=W2SAF7_9EURO	No hit	0	0	1	No hit	0
AF_DN105540_c0_g1	0	0	2.8782	Ascomycota	Peptide-N4-(N-acetyl-beta-glucosaminyl)asparagine amidase	UniRef90_A0A177CUJ2 Uncharacterized protein n=1 Tax=Paraphaeosphaeria sporulosa TaxID=1460663 RepID=A0A177CUJ2_9PLEO	No hit	0	0	1	No hit	0
AF_DN74722_c0_g1	0	0	2.87783	Ascomycota	NA	UniRef90_A0A177CKH6 Uncharacterized protein n=1 Tax=Paraphaeosphaeria sporulosa TaxID=1460663 RepID=A0A177CKH6_9PLEO	No hit	0	0	1	No hit	0
AF_DN3329_c0_g1	0	0.110559	2.87639	No hit found	NA	UniRef90_A0A0H2S8B9 Uncharacterized protein n=1 Tax=Schizopora paradoxa TaxID=27342 RepID=A0A0H2S8B9_9HOMO	No hit	0	0.0771647	0.997018	No hit	0
AF_DN15445_c0_g1	0	0	2.87169	Basidiomycota	Ubiquitin-conjugating enzyme	UniRef90_J4GBX6 Uncharacterized protein n=1 Tax=Fibroporia radiculosa TaxID=599839 RepID=J4GBX6_9APHY	No hit	0	0	1	No hit	0	gnl|TC-DB|P62837|3.A.20.1.1 Ubiquitin-conjugating enzyme E2 D2 OS=Homo sapiens GN=UBE2D2 PE=1 SV=1	89.1156
AF_DN85499_c0_g1	0	0	2.87063	Basidiomycota	NA	UniRef90_A0A0H2R6G7 Uncharacterized protein n=1 Tax=Schizopora paradoxa TaxID=27342 RepID=A0A0H2R6G7_9HOMO	No hit	0	0	1	No hit	0
AF_DN64644_c0_g1	0	0	2.8705	Ascomycota	NA	UniRef90_A0A177CHJ9 Uncharacterized protein n=1 Tax=Paraphaeosphaeria sporulosa TaxID=1460663 RepID=A0A177CHJ9_9PLEO	No hit	0	0	1	No hit	0
AF_DN10507_c0_g1	0	0	2.87046	Basidiomycota	NA	UniRef90_G4TL16 Probable heat shock protein HSP104 (Endopeptidase Clp ATP-binding chain HSP104) n=1 Tax=Serendipita indica(strain DSM 11827) TaxID=1109443 RepID=G4TL16_SERID	Hsp100	0	0	1	No hit	0
AF_DN5599_c0_g1	0	0	2.86996	Basidiomycota	Superoxide dismutase	UniRef90_A0A0D2L3I9 Superoxide dismutase n=1 Tax=Hypholoma sublateritium FD-334 SS-4 TaxID=945553 RepID=A0A0D2L3I9_9AGAR	No hit	0	0	1	No hit	0
AF_DN58688_c0_g1	0	0	2.86777	Ascomycota	NA	No hits	No hit	0	0	1	No hit	0
AF_DN75283_c0_g1	0	0.0165786	2.86732	Ascomycota	Elongation factor 2	UniRef90_W2RPU4 Elongation factor 2 n=2 Tax=Chaetothyriales TaxID=34395 RepID=W2RPU4_9EURO	No hit	0	0.0121558	0.999926	No hit	0
AF_DN13151_c0_g1	0	0	2.86444	Basidiomycota	6-phosphogluconate dehydrogenase	UniRef90_A0A165DDN6 6-phosphogluconate dehydrogenase, decarboxylating n=1 Tax=Exidia glandulosa HHB12029 TaxID=1314781 RepID=A0A165DDN6_EXIGL	No hit	0	0	1	No hit	0
AF_DN74343_c0_g1	0	0	2.86059	Ascomycota	Rhodopsin, archaeal/bacterial/fungal	UniRef90_A0A1Q5QAT8 Uncharacterized protein n=1 Tax=Talaromyces atroroseus TaxID=1441469 RepID=A0A1Q5QAT8_9EURO	No hit	0	0	1	No hit	0
AF_DN82647_c0_g1	0	0	2.85814	Ascomycota	Phosphatidyl synthase	UniRef90_A0A177CRJ7 HAD-superfamily hydrolase n=1 Tax=Paraphaeosphaeria sporulosa TaxID=1460663 RepID=A0A177CRJ7_9PLEO	No hit	0	0	1	No hit	0
AF_DN74319_c0_g1	0	0	2.85454	Basidiomycota	Alpha/beta-hydrolase	UniRef90_A0A067TAR9 Carboxylic ester hydrolase n=1 Tax=Galerina marginata (strain CBS 339.88) TaxID=685588 RepID=A0A067TAR9_GALM3	No hit	0	0	1	No hit	0
AF_DN32481_c0_g1	0	0.0210344	2.85418	Ascomycota	NA	UniRef90_A0A139IWI0 Uncharacterized protein n=1 Tax=Pseudocercospora musae TaxID=113226 RepID=A0A139IWI0_9PEZI	No hit	0	0.0154272	0.999881	No hit	0
AF_DN93288_c0_g1	0	0.0135637	2.85205	Ascomycota	EH domain binding protein epsin 2	UniRef90_W2S5I5 Uncharacterized protein n=1 Tax=Cyphellophora europaea CBS 101466 TaxID=1220924 RepID=W2S5I5_9EURO	No hit	0	0.00998945	0.99995	No hit	0
AF_DN37999_c0_g1	0	0	2.85123	Basidiomycota	NA	UniRef90_J0WS11 Uncharacterized protein n=1 Tax=Auricularia subglabra (strain TFB-10046 / SS5) TaxID=717982 RepID=J0WS11_AURST	No hit	0	0	1	No hit	0
AF_DN17180_c0_g1	0	0	2.84907	Ascomycota	Multi protein bridging factor	UniRef90_B2VZ45 Multiprotein-bridging factor 1 n=12 Tax=Pleosporineae TaxID=715340 RepID=B2VZ45_PYRTR	No hit	0	0	1	No hit	0
AF_DN95672_c0_g1	0	0	2.84828	Ascomycota	NA	UniRef90_A0A1Y2A0Q9 Uncharacterized protein n=1 Tax=Clohesyomyces aquaticus TaxID=1231657 RepID=A0A1Y2A0Q9_9PLEO	No hit	0	0	1	No hit	0
AF_DN78587_c0_g1	0	0	2.84698	Ascomycota	GPI-anchored cell wall organization protein Ecm33	UniRef90_B8LTS7 GPI-anchored cell wall organization protein Ecm33 n=2 Tax=Eurotiales TaxID=5042 RepID=B8LTS7_TALSN	No hit	0	0	1	No hit	0
AF_DN101462_c0_g1	0	0	2.84551	Ascomycota	Calcofluor white hypersensitive protein	UniRef90_W2S1E0 Uncharacterized protein n=1 Tax=Cyphellophora europaea CBS 101466 TaxID=1220924 RepID=W2S1E0_9EURO	No hit	0	0	1	No hit	0
AF_DN36099_c1_g1	0	0	2.84543	Ascomycota	Glyceraldehyde 3-phosphate dehydrogenase	UniRef90_A0A1Y2LVC8 Glyceraldehyde-3-phosphate dehydrogenase n=1 Tax=Epicoccum nigrum TaxID=105696 RepID=A0A1Y2LVC8_EPING	No hit	0	0	1	No hit	0	gnl|TC-DB|B3ET62|3.A.23.6.1 Glyceraldehyde-3-phosphate dehydrogenase OS=Amoebophilus asiaticus (strain 5a2) GN=Aasi_1069 PE=3 SV=1	70.303
AF_DN62155_c0_g1	0	0	2.84472	Basidiomycota	NA	UniRef90_E2LUD4 Uncharacterized protein n=1 Tax=Moniliophthora perniciosa (strain FA553 / isolate CP02) TaxID=554373 RepID=E2LUD4_MONPE	No hit	0	0	1	No hit	0
AF_DN82604_c0_g1	0	0.0309243	2.84466	Basidiomycota	NA	UniRef90_A0A0H2SSA0 1,3-beta-glucanosyltransferase n=1 Tax=Schizopora paradoxa TaxID=27342 RepID=A0A0H2SSA0_9HOMO	No hit	0	0.0226096	0.999744	No hit	0
AF_DN67357_c0_g1	0	0	2.84445	Ascomycota	NA	No hits	No hit	0	0	1	No hit	0
AF_DN86978_c0_g1	0	0	2.8424	Ascomycota	NA	UniRef90_A0A1Y1YQI4 Uncharacterized protein n=1 Tax=Clohesyomyces aquaticus TaxID=1231657 RepID=A0A1Y1YQI4_9PLEO	No hit	0	0	1	No hit	0
AF_DN69320_c0_g1	0	0	2.84089	Ascomycota	NA	UniRef90_A0A178DJB4 Actin cytoskeleton protein-like protein n=1 Tax=Pyrenochaeta sp. DS3sAY3a TaxID=765867 RepID=A0A178DJB4_9PLEO	No hit	0	0	1	No hit	0
AF_DN15990_c0_g1	0	0	2.83954	Basidiomycota	NA	UniRef90_A0A165EAG6 Uncharacterized protein n=1 Tax=Exidia glandulosa HHB12029 TaxID=1314781 RepID=A0A165EAG6_EXIGL	No hit	0	0	1	No hit	0
AF_DN24130_c0_g1	0.0584193	0.0398853	2.83737	Ascomycota	Molecular chaperone (Fragment)	UniRef90_A0A0J8QLQ8 Heat shock protein 90 n=1 Tax=Coccidioides immitis RMSCC 3703 TaxID=454286 RepID=A0A0J8QLQ8_COCIT	Hsp90	0.0421644	0.0290449	0.998688	No hit	0
AF_DN37965_c0_g1	0	0	2.83685	Ascomycota	NA	UniRef90_A0A0C3GW98 Uncharacterized protein (Fragment) n=1 Tax=Oidiodendron maius Zn TaxID=913774 RepID=A0A0C3GW98_9PEZI	No hit	0	0	1	No hit	0
AF_DN55360_c0_g1	0	0.00638193	2.83506	Basidiomycota	NA	No hits	No hit	0	0.00473267	0.999989	No hit	0
AF_DN26588_c0_g1	0	0	2.82911	Ascomycota	NA	UniRef90_A0A1Y1ZF07 Uncharacterized protein n=1 Tax=Clohesyomyces aquaticus TaxID=1231657 RepID=A0A1Y1ZF07_9PLEO	No hit	0	0	1	No hit	0
AF_DN25081_c0_g1	0	0	2.82781	No hit found	NA	No hits	No hit	0	0	1	No hit	0
AF_DN68832_c0_g1	0	0.0143083	2.82738	Ascomycota	NA	UniRef90_A0A178FDL7 Uncharacterized protein n=1 Tax=Trichophyton violaceum TaxID=34388 RepID=A0A178FDL7_TRIVO	No hit	0	0.0105843	0.999944	No hit	0
AF_DN106460_c0_g1	0	0	2.82527	Ascomycota	BZIP transcription factor	UniRef90_A0A1Y1ZTE4 Cross-pathway control protein 1 n=1 Tax=Clohesyomyces aquaticus TaxID=1231657 RepID=A0A1Y1ZTE4_9PLEO	No hit	0	0	1	No hit	0
AF_DN58807_c0_g1	0	0	2.82381	Basidiomycota	40S ribosomal protein S6-1	UniRef90_A0A166C8M6 40S ribosomal protein S6 n=1 Tax=Peniophora sp. CONT TaxID=1314672 RepID=A0A166C8M6_9HOMO	No hit	0	0	1	No hit	0
AF_DN17815_c0_g1	0	0	2.82227	Basidiomycota	NA	UniRef90_A0A067TJS0 Uncharacterized protein n=1 Tax=Galerina marginata (strain CBS 339.88) TaxID=685588 RepID=A0A067TJS0_GALM3	No hit	0	0	1	No hit	SP(Sec/SPI)
AF_DN74641_c0_g1	0	0	2.82197	Ascomycota	ATP-binding cassette, subfamily B (MDR/TAP), member 1	UniRef90_A0A0F8UVS4 ABC multidrug transporter Mdr1 (Fragment) n=2 Tax=Aspergillus TaxID=5052 RepID=A0A0F8UVS4_9EURO	No hit	0	0	1	No hit	0	gnl|TC-DB|B0Y3B6|3.A.1.201.10 ABC multidrug transporter Mdr1 OS=Aspergillus fumigatus (strain CEA10 / CBS 144.89 / FGSC A1163)GN=AFUB_053630 PE=4 SV=1	94.1176
AF_DN73570_c0_g1	0	0	2.81914	Basidiomycota	Multiprotein-bridging factor	UniRef90_A0A165IXV5 MBF1-domain-containing protein n=1 Tax=Exidia glandulosa HHB12029 TaxID=1314781 RepID=A0A165IXV5_EXIGL	No hit	0	0	1	No hit	0
AF_DN96335_c0_g1	0	0	2.81799	Ascomycota	NA	UniRef90_A0A0D2JT71 Uncharacterized protein n=9 Tax=Herpotrichiellaceae TaxID=43219 RepID=A0A0D2JT71_9EURO	No hit	0	0	1	No hit	0	gnl|TC-DB|Q06493|2.A.97.1.4 LETM1 domain-containing protein YLH47, mitochondrial OS=Saccharomyces cerevisiae GN=YLH47 PE=1 SV=1	70.3704
AF_DN1174_c0_g1	0	0	2.81669	Basidiomycota	Deubiquitination-protection protein dph1	UniRef90_W4KKP8 Uncharacterized protein n=1 Tax=Heterobasidion irregulare TC 32-1 TaxID=747525 RepID=W4KKP8_9HOMO	No hit	0	0	1	No hit	0
AF_DN32990_c0_g1	0	0	2.81491	Ascomycota	Serine threonine protein kinase	UniRef90_A0A177C4I2 Kinase-like protein n=1 Tax=Paraphaeosphaeria sporulosa TaxID=1460663 RepID=A0A177C4I2_9PLEO	No hit	0	0	1	No hit	0
AF_DN85390_c0_g1	0	0	2.81479	Ascomycota	NA	UniRef90_A0A177C9H9 Uncharacterized protein n=1 Tax=Paraphaeosphaeria sporulosa TaxID=1460663 RepID=A0A177C9H9_9PLEO	No hit	0	0	1	No hit	0
AF_DN3131_c0_g1	0	0	2.81234	Ascomycota	NA	UniRef90_A0A177CPF5 Uncharacterized protein n=1 Tax=Paraphaeosphaeria sporulosa TaxID=1460663 RepID=A0A177CPF5_9PLEO	No hit	0	0	1	No hit	0
AF_DN83721_c0_g1	0	0	2.80988	Ascomycota	NA	No hits	No hit	0	0	1	No hit	0
AF_DN13620_c0_g1	0	0	2.80961	Ascomycota	S-(Hydroxymethyl)glutathione dehydrogenase (Fragment)	UniRef90_A7EEB7 Uncharacterized protein n=1 Tax=Sclerotinia sclerotiorum (strain ATCC 18683 / 1980 / Ss-1) TaxID=665079 RepID=A7EEB7_SCLS1	No hit	0	0	1	No hit	0
AF_DN66542_c0_g1	0	0	2.80533	Basidiomycota	NA	UniRef90_A0A0H2RHH1 Phosphoketolase n=1 Tax=Schizopora paradoxa TaxID=27342 RepID=A0A0H2RHH1_9HOMO	No hit	0	0	1	No hit	0
AF_DN67646_c0_g1	0	0	2.80461	Ascomycota	NA	UniRef90_S3CA36 Uncharacterized protein n=1 Tax=Ophiostoma piceae (strain UAMH 11346) TaxID=1262450 RepID=S3CA36_OPHP1	No hit	0	0	1	No hit	0
AF_DN17399_c0_g1	0	0	2.8045	Basidiomycota	NA	UniRef90_A0A165P4Y6 Flavocytochrome c n=1 Tax=Exidia glandulosa HHB12029 TaxID=1314781 RepID=A0A165P4Y6_EXIGL	No hit	0	0	1	No hit	0
AF_DN76888_c0_g1	0	0	2.80315	Ascomycota	DDHD domain-containing protein	UniRef90_B2W0X5 Uncharacterized protein n=16 Tax=Pleosporales TaxID=92860 RepID=B2W0X5_PYRTR	No hit	0	0	1	No hit	0
AF_DN102289_c0_g1	0	0.0157041	2.80129	Basidiomycota	Heat shock protein 16	UniRef90_A0A0H2SQ87 HSP20-like chaperone n=2 Tax=Schizopora paradoxa TaxID=27342 RepID=A0A0H2SQ87_9HOMO	ACD	0	0.0116682	0.999932	No hit	0
AF_DN77385_c0_g1	0	0	2.80096	Ascomycota	NA	UniRef90_A0A1Y1ZBA2 Acyl transferase/acyl hydrolase/lysophospholipase n=1 Tax=Clohesyomyces aquaticus TaxID=1231657 RepID=A0A1Y1ZBA2_9PLEO	No hit	0	0	1	No hit	0
AF_DN101257_c0_g1	0	0	2.8004	Ascomycota	NADP-specific glutamate dehydrogenase	UniRef90_A0A177CK64 Glutamate dehydrogenase n=2 Tax=Dikarya TaxID=451864 RepID=A0A177CK64_9PLEO	No hit	0	0	1	No hit	0
AF_DN95310_c0_g1	0	0	2.79783	Ascomycota	NA	UniRef90_A0A1Y1ZUH0 Uncharacterized protein n=1 Tax=Clohesyomyces aquaticus TaxID=1231657 RepID=A0A1Y1ZUH0_9PLEO	No hit	0	0	1	No hit	0
AF_DN102361_c0_g1	0	0	2.79411	Ascomycota	Hemerythrin HHE cation binding domain protein	UniRef90_A0A066X619 Putative HHE domain-containing protein n=2 Tax=Colletotrichum TaxID=5455 RepID=A0A066X619_COLSU	No hit	0	0	1	No hit	0
AF_DN101877_c0_g1	0	0	2.78949	Basidiomycota	Brain abundant membrane attached signal protein 1	UniRef90_A0A0H2S716 Uncharacterized protein (Fragment) n=1 Tax=Schizopora paradoxa TaxID=27342 RepID=A0A0H2S716_9HOMO	No hit	0	0	1	No hit	0
AF_DN36099_c0_g1	0	0	2.78939	Ascomycota	Glyceraldehyde 3-phosphate dehydrogenase (Fragment)	UniRef90_Q5ISV0 Glyceraldehyde-3-phosphate dehydrogenase (Fragment) n=11 Tax=Stictidaceae TaxID=56757 RepID=Q5ISV0_9LECA	No hit	0	0	1	No hit	0
AF_DN85751_c0_g1	0	0	2.78758	Basidiomycota	NA	No hits	No hit	0	0	1	No hit	0
AF_DN73673_c0_g1	0	0	2.78183	Ascomycota	NA	UniRef90_A0A178E8E0 Uncharacterized protein n=1 Tax=Pyrenochaeta sp. DS3sAY3a TaxID=765867 RepID=A0A178E8E0_9PLEO	No hit	0	0	1	No hit	0
AF_DN82769_c0_g1	0	0	2.77741	Ascomycota	NA	UniRef90_A0A1Y2AA02 Fumarate reductase-like protein n=1 Tax=Clohesyomyces aquaticus TaxID=1231657 RepID=A0A1Y2AA02_9PLEO	No hit	0	0	1	No hit	0
AF_DN85103_c0_g1	0	0	2.77569	Basidiomycota	Eukaryotic ribosomal protein L18	UniRef90_A0A0D2NHJ9 Uncharacterized protein n=1 Tax=Hypholoma sublateritium FD-334 SS-4 TaxID=945553 RepID=A0A0D2NHJ9_9AGAR	No hit	0	0	1	No hit	0
AF_DN67070_c0_g1	0	0	2.77457	Basidiomycota	NA	UniRef90_A0A0H2RZS8 Chitin synthase n=1 Tax=Schizopora paradoxa TaxID=27342 RepID=A0A0H2RZS8_9HOMO	No hit	0	0	1	No hit	0
AF_DN36283_c0_g1	0	0	2.76956	Basidiomycota	NA	UniRef90_A0A067TWH1 Uncharacterized protein n=1 Tax=Galerina marginata (strain CBS 339.88) TaxID=685588 RepID=A0A067TWH1_GALM3	No hit	0	0	1	No hit	0
AF_DN54986_c0_g1	0	0	2.76772	Basidiomycota	Protein disulfide isomerase family A, member 2 (Fragment)	UniRef90_A0A0C2X8F7 Protein disulfide-isomerase n=1 Tax=Serendipita vermifera MAFF 305830 TaxID=933852 RepID=A0A0C2X8F7_9HOMO	No hit	0	0	1	No hit	0
AF_DN94208_c0_g1	0	0	2.76599	Ascomycota	NA	No hits	No hit	0	0	1	No hit	0
AF_DN19716_c0_g1	0	0.0143101	2.76564	Basidiomycota	Ish1 domain-containing protein	UniRef90_A0A165ITZ8 Uncharacterized protein n=1 Tax=Exidia glandulosa HHB12029 TaxID=1314781 RepID=A0A165ITZ8_EXIGL	No hit	0	0.0107155	0.999943	No hit	0
AF_DN58230_c0_g1	0.011716	0	2.76554	Basidiomycota	ATP synthase subunit alpha	UniRef90_K5X1I1 ATP synthase subunit alpha n=28 Tax=Agaricomycetes TaxID=155619 RepID=K5X1I1_AGABU	No hit	0.0087846	0	0.999961	GT4	0	gnl|TC-DB|P07251|3.A.2.1.3 ATP synthase alpha chain, mitochondrial precursor (EC 3.6.1.34) - Saccharomyces cerevisiae (Baker's yeast).	88.2521
AF_DN66189_c0_g1	0	0	2.7653	No hit found	NA	UniRef90_G4TBL4 Uncharacterized protein n=1 Tax=Serendipita indica (strain DSM 11827) TaxID=1109443 RepID=G4TBL4_SERID	No hit	0	0	1	No hit	0
AF_DN54739_c0_g1	0	0	2.765	Basidiomycota	ATP synthase subunit beta	UniRef90_A8NEG5 ATP synthase subunit beta (Fragment) n=1 Tax=Coprinopsis cinerea (strain Okayama-7 / 130 / ATCC MYA-4618/ FGSC 9003) TaxID=240176 RepID=A8NEG5_COPC7	No hit	0	0	1	No hit	0	gnl|TC-DB|A1B8P0|3.A.2.1.7 ATP synthase subunit beta OS=Paracoccus denitrificans (strain Pd 1222) GN=atpD PE=3 SV=1	91.2442
AF_DN104210_c0_g1	0	0	2.76485	Basidiomycota	NA	UniRef90_A0A0H2R1C6 Uncharacterized protein n=1 Tax=Schizopora paradoxa TaxID=27342 RepID=A0A0H2R1C6_9HOMO	No hit	0	0	1	No hit	0
AF_DN101548_c0_g1	0	0	2.76459	Basidiomycota	Serine-threonine rich	UniRef90_A0A0W0G387 Uncharacterized protein n=2 Tax=Moniliophthora roreri TaxID=221103 RepID=A0A0W0G387_9AGAR	No hit	0	0	1	No hit	0
AF_DN93058_c0_g1	0	0	2.76358	Basidiomycota	Eukaryotic translation elongation factor 2 (Fragment)	UniRef90_A8N392 Uncharacterized protein n=1 Tax=Coprinopsis cinerea (strain Okayama-7 / 130 / ATCC MYA-4618 / FGSC 9003)TaxID=240176 RepID=A8N392_COPC7	No hit	0	0	1	No hit	0
AF_DN85204_c0_g1	0	0	2.76242	Ascomycota	NA	No hits	No hit	0	0	1	No hit	0
AF_DN54925_c0_g1	0	0	2.75982	Ascomycota	NA	No hits	No hit	0	0	1	No hit	0
AF_DN83657_c0_g1	0	0	2.75592	Ascomycota	NA	UniRef90_A0A0N1HGL2 Flavin carrier protein 2 n=1 Tax=Phialophora attae TaxID=1664694 RepID=A0A0N1HGL2_9EURO	No hit	0	0	1	No hit	0
AF_DN4070_c0_g1	0	0	2.75356	Ascomycota	Intradiol ring-cleavage dioxygenase	UniRef90_A0A1Y2A424 Intradiol ring-cleavage dioxygenase n=1 Tax=Clohesyomyces aquaticus TaxID=1231657 RepID=A0A1Y2A424_9PLEO	No hit	0	0	1	No hit	0
AF_DN31511_c0_g1	0	0	2.75343	Basidiomycota	Carbohydrate-binding module family 50 protein (Fragment)	UniRef90_A0A137QCX6 Uncharacterized protein n=1 Tax=Leucoagaricus sp. SymC.cos TaxID=1714833 RepID=A0A137QCX6_9AGAR	No hit	0	0	1	No hit	0
AF_DN40426_c0_g1	0	0.0191146	2.7488	Ascomycota	Winged helix-turn-helix transcription repressor DNA-binding	UniRef90_A0A232M775 Uncharacterized protein n=1 Tax=Elaphomyces granulatus TaxID=519963 RepID=A0A232M775_9EURO	No hit	0	0.0143271	0.999897	No hit	0
AF_DN59297_c0_g1	0	0	2.74297	Basidiomycota	NA	UniRef90_A0A0H2RTI0 Uncharacterized protein n=1 Tax=Schizopora paradoxa TaxID=27342 RepID=A0A0H2RTI0_9HOMO	No hit	0	0	1	No hit	0
AF_DN99837_c0_g1	0	0	2.74225	Basidiomycota	NA	UniRef90_A0A0H2SK19 E3 ubiquitin-protein ligase n=1 Tax=Schizopora paradoxa TaxID=27342 RepID=A0A0H2SK19_9HOMO	No hit	0	0	1	No hit	0	gnl|TC-DB|P39940|3.A.31.1.1 E3 ubiquitin-protein ligase RSP5 OS=Saccharomyces cerevisiae (strain ATCC 204508 / S288c) OX=559292 GN=RSP5 PE=1 SV=1	87.6923
AF_DN109547_c0_g1	0	0	2.73997	Basidiomycota	Large subunit ribosomal protein L12	UniRef90_B0D8W1 Predicted protein n=10 Tax=Agaricales TaxID=5338 RepID=B0D8W1_LACBS	No hit	0	0	1	No hit	0
AF_DN94794_c0_g1	0	0	2.73993	Ascomycota	NA	UniRef90_A0A0L1HW94 Bzip transcription factor n=1 Tax=Stemphylium lycopersici TaxID=183478 RepID=A0A0L1HW94_9PLEO	No hit	0	0	1	No hit	0
AF_DN105918_c0_g1	0	0	2.73921	Basidiomycota	NA	UniRef90_A0A0H2RZA5 Uncharacterized protein n=1 Tax=Schizopora paradoxa TaxID=27342 RepID=A0A0H2RZA5_9HOMO	No hit	0	0	1	No hit	0
AF_DN10737_c0_g1	0	0	2.73887	Ascomycota	Heat shock protein SSB	UniRef90_W9WHJ5 Heat shock protein SSB1 n=1 Tax=Cladophialophora psammophila CBS 110553 TaxID=1182543 RepID=W9WHJ5_9EURO	Hsp70	0	0	1	No hit	0
AF_DN75674_c0_g1	0	0	2.73624	Ascomycota	NA	UniRef90_E5A891 Similar to n-acetylglucosamine-6-phosphate deacetylase n=1 Tax=Leptosphaeria maculans (strain JN3 / isolate v23.1.3 / race Av1-4-5-6-7-8) TaxID=985895 RepID=E5A891_LEPMJ	No hit	0	0	1	No hit	0
AF_DN5045_c0_g1	0	0	2.73606	Basidiomycota	NA	UniRef90_A0A067TQ88 Uncharacterized protein n=1 Tax=Galerina marginata (strain CBS 339.88) TaxID=685588 RepID=A0A067TQ88_GALM3	No hit	0	0	1	No hit	0
AF_DN37438_c0_g1	0	0	2.73552	Asco or Basidio	NA	No hits	No hit	0	0	1	No hit	0
AF_DN8752_c0_g1	0	0	2.73542	Ascomycota	Nucleotide binding	UniRef90_A0A178E2A1 Calcipressin n=1 Tax=Pyrenochaeta sp. DS3sAY3a TaxID=765867 RepID=A0A178E2A1_9PLEO	No hit	0	0	1	No hit	0
AF_DN18971_c0_g1	0	0	2.73502	Ascomycota	NA	UniRef90_A0A225AMA2 Uncharacterized protein n=1 Tax=Talaromyces atroroseus TaxID=1441469 RepID=A0A225AMA2_9EURO	No hit	0	0	1	No hit	0
AF_DN86302_c0_g1	0	0	2.73406	No hit found	NA	UniRef90_A0A0H2RGI1 SRF-TF-domain-containing protein n=1 Tax=Schizopora paradoxa TaxID=27342 RepID=A0A0H2RGI1_9HOMO	No hit	0	0	1	No hit	0
AF_DN88089_c0_g1	0	0	2.73269	Basidiomycota	Putative Peanut-like protein 1 (Cell division control like protein 1)	UniRef90_A0A165Q6E0 Septin n=2 Tax=Exidia glandulosa HHB12029 TaxID=1314781 RepID=A0A165Q6E0_EXIGL	No hit	0	0	1	No hit	0
AF_DN109342_c0_g1	0	0	2.72891	Basidiomycota	NA	UniRef90_A0A0H2S7P6 Uncharacterized protein n=1 Tax=Schizopora paradoxa TaxID=27342 RepID=A0A0H2S7P6_9HOMO	No hit	0	0	1	No hit	0
AF_DN64638_c0_g1	0	0	2.72686	Basidiomycota	NA	No hits	No hit	0	0	1	No hit	0
AF_DN55860_c0_g1	0	0	2.72578	Ascomycota	NA	UniRef90_A0A0G4MS50 Uncharacterized protein (Fragment) n=1 Tax=Verticillium longisporum TaxID=100787 RepID=A0A0G4MS50_9PEZI	No hit	0	0	1	No hit	0	gnl|TC-DB|P25694|3.A.16.1.2 Cell division control protein 48 - Saccharomyces cerevisiae (Baker's yeast).	96.8421
AF_DN107098_c0_g1	0	0.0170486	2.7243	Basidiomycota	Ser-thr-rich glycosyl-phosphatidyl-inositol-anchored membrane family protein	UniRef90_A0A067TVI2 Uncharacterized protein n=1 Tax=Galerina marginata (strain CBS 339.88) TaxID=685588 RepID=A0A067TVI2_GALM3	No hit	0	0.0128556	0.999917	No hit	0
AF_DN85168_c0_g1	0	0	2.72269	Ascomycota	Mitochondrial protein sorting	UniRef90_W2RLA9 Uncharacterized protein n=1 Tax=Cyphellophora europaea CBS 101466 TaxID=1220924 RepID=W2RLA9_9EURO	No hit	0	0	1	No hit	0
AF_DN85052_c0_g1	0	0	2.72268	Basidiomycota	Transaldolase	UniRef90_A0A165JGI3 Transaldolase n=1 Tax=Exidia glandulosa HHB12029 TaxID=1314781 RepID=A0A165JGI3_EXIGL	No hit	0	0	1	No hit	0
AF_DN1660_c0_g1	0	0	2.72249	Ascomycota	NA	No hits	No hit	0	0	1	No hit	0
AF_DN96601_c0_g1	0	0	2.71855	Basidiomycota	NA	UniRef90_A0A0H2RSN4 Uncharacterized protein n=1 Tax=Schizopora paradoxa TaxID=27342 RepID=A0A0H2RSN4_9HOMO	No hit	0	0	1	No hit	0
AF_DN98213_c0_g1	0	0.05486	2.71849	Ascomycota	NA	UniRef90_A0A1Q5QA01 Uncharacterized protein n=1 Tax=Talaromyces atroroseus TaxID=1441469 RepID=A0A1Q5QA01_9EURO	No hit	0	0.0406329	0.999174	No hit	0
AF_DN83853_c0_g1	0	0	2.71725	Basidiomycota	Peptidyl-prolyl cis-trans isomerase	UniRef90_S7RLJ3 Peptidyl-prolyl cis-trans isomerase n=2 Tax=Gloeophyllaceae TaxID=452340 RepID=S7RLJ3_GLOTA	No hit	0	0	1	No hit	0	gnl|TC-DB|F4K2G0|3.D.1.8.1 Peptidyl-prolyl cis-trans isomerase OS=Arabidopsis thaliana GN=CYP20-2 PE=3 SV=1	74.8466
AF_DN74615_c0_g1	0	0	2.71482	Ascomycota	Glutathione peroxidase	UniRef90_A0A177CR94 Multifunctional fusion protein n=1 Tax=Paraphaeosphaeria sporulosa TaxID=1460663 RepID=A0A177CR94_9PLEO	No hit	0	0	1	No hit	0
AF_DN3381_c0_g1	0	0	2.71472	Ascomycota	NA	UniRef90_A0A1Y2A2W4 Uncharacterized protein n=1 Tax=Clohesyomyces aquaticus TaxID=1231657 RepID=A0A1Y2A2W4_9PLEO	No hit	0	0	1	No hit	0
AF_DN96703_c0_g1	0	0	2.71444	Ascomycota	NA	UniRef90_A0A0N0NHZ4 Polyadenylate-binding protein n=1 Tax=Phialophora attae TaxID=1664694 RepID=A0A0N0NHZ4_9EURO	No hit	0	0	1	No hit	0
AF_DN73638_c0_g1	0	0	2.71387	Basidiomycota	GPI-anchored small secreted protein	UniRef90_A0A067TVI2 Uncharacterized protein n=1 Tax=Galerina marginata (strain CBS 339.88) TaxID=685588 RepID=A0A067TVI2_GALM3	No hit	0	0	1	No hit	SP(Sec/SPI)
AF_DN80253_c0_g1	0	0.060657	2.71263	Basidiomycota	Trehalose phosphorylase (Fragment)	UniRef90_A0A0C3CZW6 Glycosyltransferase family 4 protein n=3 Tax=Agaricales TaxID=5338 RepID=A0A0C3CZW6_HEBCY	No hit	0	0.0448483	0.998994	No hit	0
AF_DN25179_c0_g1	0	0.00804903	2.71169	Ascomycota	Branchpoint-bridging protein, variant	UniRef90_A0A2H3J197 Zinc finger, CCHC-type n=1 Tax=Penicillium occitanis TaxID=290292 RepID=A0A2H3J197_9EURO	No hit	0	0.00611265	0.999981	No hit	0
AF_DN3813_c0_g1	0	0	2.71107	Ascomycota	26S proteasome regulatory subunit N4	UniRef90_W9VX34 26S proteasome regulatory subunit N4 n=5 Tax=Herpotrichiellaceae TaxID=43219 RepID=W9VX34_9EURO	No hit	0	0	1	No hit	0
AF_DN56534_c0_g1	0	0	2.71063	Ascomycota	Pirin (Iron-binding nuclear protein)	UniRef90_A0A084QIF7 Uncharacterized protein n=3 Tax=Stachybotrys TaxID=74721 RepID=A0A084QIF7_STAC4	No hit	0	0	1	No hit	0
AF_DN95677_c0_g1	0	0	2.71038	Basidiomycota	NA	UniRef90_A0A0C3BEV5 Uncharacterized protein (Fragment) n=1 Tax=Serendipita vermifera MAFF 305830 TaxID=933852 RepID=A0A0C3BEV5_9HOMO	No hit	0	0	1	No hit	0
AF_DN38985_c0_g1	0	0.00469193	2.71013	Basidiomycota	Glycoside hydrolase	UniRef90_A0A165LPC9 Glycoside hydrolase n=1 Tax=Exidia glandulosa HHB12029 TaxID=1314781 RepID=A0A165LPC9_EXIGL	No hit	0	0.00357032	0.999994	GH18(5-298)	0
AF_DN43830_c0_g1	0	0	2.70986	Ascomycota	NA	UniRef90_A0A1Y1ZKU7 Uncharacterized protein n=1 Tax=Clohesyomyces aquaticus TaxID=1231657 RepID=A0A1Y1ZKU7_9PLEO	No hit	0	0	1	No hit	0
AF_DN29308_c0_g1	0	0.00807607	2.70869	Basidiomycota	Succinyl-CoA:3-ketoacid-coenzyme A transferase	UniRef90_A0A0H2R8X8 Succinyl-CoA:3-ketoacid-coenzyme A transferase n=1 Tax=Schizopora paradoxa TaxID=27342 RepID=A0A0H2R8X8_9HOMO	No hit	0	0.00613688	0.999981	No hit	0
AF_DN83129_c0_g1	0	0.0122177	2.70823	Ascomycota	NA	UniRef90_A0A225AR46 Uncharacterized protein n=1 Tax=Talaromyces atroroseus TaxID=1441469 RepID=A0A225AR46_9EURO	No hit	0	0.00926566	0.999957	No hit	0
AF_DN64167_c0_g1	0	0	2.70442	Ascomycota	NA	UniRef90_A0A225AQZ9 Uncharacterized protein n=1 Tax=Talaromyces atroroseus TaxID=1441469 RepID=A0A225AQZ9_9EURO	No hit	0	0	1	No hit	0
AF_DN12729_c0_g1	0	0.0108796	2.70295	Ascomycota	Bzip transcription factor	UniRef90_M2RIH8 Uncharacterized protein n=4 Tax=Bipolaris TaxID=33194 RepID=M2RIH8_COCSN	No hit	0	0.00826541	0.999966	No hit	0
AF_DN87940_c0_g1	0	0	2.7029	Ascomycota	NA	UniRef90_A0A1Y2LMA1 1,3-beta-glucanosyltransferase n=1 Tax=Epicoccum nigrum TaxID=105696 RepID=A0A1Y2LMA1_EPING	No hit	0	0	1	No hit	0
AF_DN74449_c0_g1	0	0	2.70286	Ascomycota	Allergen Asp f 4	UniRef90_A0A0G2EB37 Putative allergen asp f 4 n=1 Tax=Phaeomoniella chlamydospora TaxID=158046 RepID=A0A0G2EB37_9EURO	No hit	0	0	1	No hit	SP(Sec/SPI)
AF_DN96426_c0_g1	0	0	2.70191	Basidiomycota	Transporter	UniRef90_UPI000440CBFA hypothetical protein n=1 Tax=Stereum hirsutum (strain FP-91666) TaxID=721885 RepID=UPI000440CBFA	No hit	0	0	1	No hit	0
AF_DN32185_c0_g1	0.277537	0.169042	2.70165	Basidiomycota	Glyoxylate pathway regulator	UniRef90_A0A067SH40 Uncharacterized protein n=1 Tax=Galerina marginata (strain CBS 339.88) TaxID=685588 RepID=A0A067SH40_GALM3	No hit	0.182701	0.116501	0.976242	No hit	0
AF_DN82162_c0_g1	0	0	2.70158	Ascomycota	NA	UniRef90_A0A1Y1Y3R1 Uncharacterized protein n=1 Tax=Clohesyomyces aquaticus TaxID=1231657 RepID=A0A1Y1Y3R1_9PLEO	No hit	0	0	1	No hit	SP(Sec/SPI)
AF_DN29613_c0_g1	0	0	2.70157	Ascomycota	NA	UniRef90_R8BCH4 Putative 26s proteasome regulatory subunit-like protein n=1 Tax=Togninia minima (strain UCR-PA7) TaxID=1286976 RepID=R8BCH4_TOGMI	No hit	0	0	1	No hit	0
AF_DN64985_c0_g1	0	0	2.70127	Basidiomycota	NA	UniRef90_A0A0H2SJ43 NAD-binding protein n=1 Tax=Schizopora paradoxa TaxID=27342 RepID=A0A0H2SJ43_9HOMO	No hit	0	0	1	No hit	0
AF_DN81655_c0_g1	0	0	2.70072	Ascomycota	NA	No hits	No hit	0	0	1	No hit	0
AF_DN83586_c0_g1	0	0	2.70031	Ascomycota	D-ala D-ala ligase C-terminus	UniRef90_A0A1L9VZC1 Uncharacterized protein n=1 Tax=Aspergillus glaucus CBS 516.65 TaxID=1160497 RepID=A0A1L9VZC1_ASPGL	No hit	0	0	1	No hit	0
AF_DN73905_c0_g1	0	0	2.69953	Basidiomycota	Calnexin	UniRef90_A0A0H2RZC9 Calreticulin-domain-containing protein n=1 Tax=Schizopora paradoxa TaxID=27342 RepID=A0A0H2RZC9_9HOMO	No hit	0	0	1	No hit	0
AF_DN2390_c0_g1	0	0	2.69865	Ascomycota	L-xylulose reductase (Fragment)	UniRef90_A0A177CCJ7 Putative NADP-dependent mannitol dehydrogenase n=1 Tax=Paraphaeosphaeria sporulosa TaxID=1460663 RepID=A0A177CCJ7_9PLEO	No hit	0	0	1	No hit	0
AF_DN18249_c0_g1	0	0	2.69317	Ascomycota	NA	No hits	No hit	0	0	1	No hit	0
AF_DN8303_c0_g1	0	0	2.69269	Ascomycota	NA	UniRef90_Q0V454 Uncharacterized protein n=2 Tax=Pleosporales TaxID=92860 RepID=Q0V454_PHANO	No hit	0	0	1	No hit	0
AF_DN15563_c0_g1	0	0	2.69248	Ascomycota	NA	No hits	No hit	0	0	1	No hit	0
AF_DN21502_c0_g1	0	0	2.69061	Basidiomycota	HHE domain-containing	UniRef90_A0A0H2RTN6 Uncharacterized protein n=1 Tax=Schizopora paradoxa TaxID=27342 RepID=A0A0H2RTN6_9HOMO	No hit	0	0	1	No hit	0
AF_DN65363_c0_g1	0	0	2.68959	Ascomycota	Translation elongation factor 1 subunit beta	UniRef90_A0A1L9SRQ0 Uncharacterized protein n=1 Tax=Penicilliopsis zonata CBS 506.65 TaxID=1073090 RepID=A0A1L9SRQ0_9EURO	No hit	0	0	1	No hit	SP(Sec/SPI)
AF_DN22568_c0_g1	0	0	2.68897	Ascomycota	NA	UniRef90_A9XAN7 Heat shock protein Hsp70 (Fragment) n=1 Tax=Glomerella acutata TaxID=27357 RepID=A9XAN7_GLOAC	Hsp70	0	0	1	No hit	0	gnl|TC-DB|P0A6Y8|1.A.33.1.2 Chaperone protein dnaK - Escherichia coli.	82.6923
AF_DN82930_c0_g1	0	0	2.68598	Ascomycota	Autophagy-related protein 8	UniRef90_A0A2L2U2U0 Autophagy-related protein n=1 Tax=Fusarium venenatum TaxID=56646 RepID=A0A2L2U2U0_9HYPO	No hit	0	0	1	No hit	0	gnl|TC-DB|A8MS84|9.A.15.3.1 Autophagy-related protein OS=Arabidopsis thaliana GN=APG8A PE=3 SV=1	82.3009
AF_DN90524_c0_g1	0	0	2.68595	Basidiomycota	Adenine nucleotide ADP/ATP translocase (Fragment)	UniRef90_A5HUF4 Adenine nucleotide translocator n=1 Tax=Physarum polycephalum TaxID=5791 RepID=A5HUF4_PHYPO	No hit	0	0	1	No hit	0	gnl|TC-DB|P18239|2.A.29.1.7 ADP,ATP carrier protein 2 - Saccharomyces cerevisiae (Baker's yeast).	84.0336
AF_DN74074_c0_g1	0	0	2.68552	Basidiomycota	NA	No hits	No hit	0	0	1	No hit	0
AF_DN108125_c0_g1	0	0.178958	2.68551	Ascomycota	NA	UniRef90_A0A0L1J6U9 Sugar transporter n=9 Tax=Aspergillus TaxID=5052 RepID=A0A0L1J6U9_ASPNO	No hit	0	0.125218	0.992129	No hit	0	gnl|TC-DB|Q8J0V1|2.A.1.1.57 Monosaccharide transporter - Aspergillus niger.	82
AF_DN19808_c0_g1	0	0	2.68128	Ascomycota	NA	UniRef90_A0A1Y1ZPX6 Uncharacterized protein n=1 Tax=Clohesyomyces aquaticus TaxID=1231657 RepID=A0A1Y1ZPX6_9PLEO	No hit	0	0	1	No hit	0
AF_DN81546_c0_g1	0	0	2.68116	Ascomycota	NA	UniRef90_A0A178E598 Uncharacterized protein n=1 Tax=Pyrenochaeta sp. DS3sAY3a TaxID=765867 RepID=A0A178E598_9PLEO	No hit	0	0	1	No hit	0
AF_DN104885_c0_g1	0.0525422	0.0326344	2.68075	Basidiomycota	NA	UniRef90_A0A165QQ80 Uncharacterized protein n=1 Tax=Exidia glandulosa HHB12029 TaxID=1314781 RepID=A0A165QQ80_EXIGL	No hit	0.0392546	0.0246169	0.998926	No hit	0
AF_DN5440_c0_g1	0	0	2.67966	Ascomycota	NA	UniRef90_A0A093XVF7 Kelch-like protein 38 n=4 Tax=Eurotiales TaxID=5042 RepID=A0A093XVF7_TALMA	No hit	0	0	1	No hit	0
AF_DN62065_c0_g1	0	0	2.67603	Basidiomycota	Respiratory burst oxidase-like protein	UniRef90_A0A067TDU9 Uncharacterized protein n=1 Tax=Galerina marginata (strain CBS 339.88) TaxID=685588 RepID=A0A067TDU9_GALM3	No hit	0	0	1	No hit	0
AF_DN82883_c0_g1	0	0.031835	2.67575	Basidiomycota	Heme peroxidase (Fragment)	UniRef90_A0A0H2RDU9 Peroxidase n=1 Tax=Schizopora paradoxa TaxID=27342 RepID=A0A0H2RDU9_9HOMO	No hit	0	0.0240673	0.99971	No hit	0
AF_DN97119_c0_g1	0	0	2.67528	Ascomycota	Regulatory protein cys-3	UniRef90_A0A225AES4 Uncharacterized protein n=1 Tax=Talaromyces atroroseus TaxID=1441469 RepID=A0A225AES4_9EURO	No hit	0	0	1	No hit	0
AF_DN106480_c0_g1	0	0	2.67481	Basidiomycota	Putative GTP-binding protein (Fragment)	UniRef90_A0A0D2N7U1 Uncharacterized protein n=7 Tax=Agaricales TaxID=5338 RepID=A0A0D2N7U1_9AGAR	Hsp70	0	0	1	No hit	0	gnl|TC-DB|P11021|1.A.33.1.5 78 kDa glucose-regulated protein OS=Homo sapiens GN=HSPA5 PE=1 SV=2	92.4242
AF_DN84899_c0_g1	0	0	2.6748	Ascomycota	NA	UniRef90_F0XMF4 Heat shock protein 90 n=5 Tax=Ophiostomataceae TaxID=5152 RepID=F0XMF4_GROCL	Hsp90	0	0	1	No hit	0	gnl|TC-DB|P08238|8.A.163.1.1 Heat shock protein HSP 90-beta OS=Homo sapiens OX=9606 GN=HSP90AB1 PE=1 SV=4	71.4286
AF_DN92240_c0_g1	0	0	2.67418	Basidiomycota	NA	UniRef90_A0A0H2RSM0 Uncharacterized protein n=1 Tax=Schizopora paradoxa TaxID=27342 RepID=A0A0H2RSM0_9HOMO	No hit	0	0	1	No hit	0
AF_DN92635_c0_g1	0	0.0144389	2.67404	Basidiomycota	NA	UniRef90_A0A0H2S1K0 Uncharacterized protein n=1 Tax=Schizopora paradoxa TaxID=27342 RepID=A0A0H2S1K0_9HOMO	No hit	0	0.0110158	0.999939	No hit	0
AF_DN75241_c0_g1	0	0	2.67182	Basidiomycota	Phosphoribosylformylglycinamidine cyclo-ligase	UniRef90_G4T9P8 Probable bifunctional purine biosynthetic protein ade1 n=1 Tax=Serendipita indica (strain DSM 11827) TaxID=1109443 RepID=G4T9P8_SERID	No hit	0	0	1	No hit	0
AF_DN103518_c0_g1	0	0	2.67113	Ascomycota	NA	UniRef90_A0A2H3IDH9 1,3-beta-glucanosyltransferase n=1 Tax=Penicillium occitanis TaxID=290292 RepID=A0A2H3IDH9_9EURO	No hit	0	0	1	No hit	0
AF_DN86403_c0_g1	0	0	2.67075	Ascomycota	NA	UniRef90_W2S2P0 Fatty acid synthase subunit alpha n=2 Tax=Chaetothyriales TaxID=34395 RepID=W2S2P0_9EURO	No hit	0	0	1	No hit	0
AF_DN101724_c1_g1	0	0	2.66837	Ascomycota	NA	UniRef90_A0A0C3AXM6 Uncharacterized protein n=1 Tax=Piloderma croceum F 1598 TaxID=765440 RepID=A0A0C3AXM6_9HOMO	ACD	0	0	1	No hit	0
AF_DN77496_c0_g1	0	0	2.66751	Ascomycota	NA	UniRef90_A0A1Y1ZUH0 Uncharacterized protein n=1 Tax=Clohesyomyces aquaticus TaxID=1231657 RepID=A0A1Y1ZUH0_9PLEO	No hit	0	0	1	No hit	0
AF_DN73228_c0_g1	0	0.0126373	2.66553	Basidiomycota	NA	UniRef90_A0A0H2SNQ0 Uncharacterized protein n=1 Tax=Schizopora paradoxa TaxID=27342 RepID=A0A0H2SNQ0_9HOMO	No hit	0	0.00966727	0.999953	No hit	0
AF_DN15201_c0_g1	0	0	2.66131	Basidiomycota	NA	UniRef90_B0D2X7 Polysaccharide lyase family 14 protein n=2 Tax=Laccaria TaxID=29882 RepID=B0D2X7_LACBS	No hit	0	0	1	No hit	SP(Sec/SPI)
AF_DN92687_c0_g1	0	0.0125712	2.65989	Ascomycota	NA	UniRef90_A0A0D1X6T6 Chaperone DnaJ n=3 Tax=Exophiala mesophila TaxID=212818 RepID=A0A0D1X6T6_9EURO	DnaJ	0	0.00962847	0.999954	No hit	0
AF_DN32526_c0_g1	0	0	2.65963	Basidiomycota	Lytic polysaccharide monooxygenase	UniRef90_A0A067SZR5 Uncharacterized protein n=1 Tax=Galerina marginata (strain CBS 339.88) TaxID=685588 RepID=A0A067SZR5_GALM3	No hit	0	0	1	AA9(8-222)	SP(Sec/SPI)
AF_DN105586_c0_g1	0	0	2.65731	Ascomycota	NA	UniRef90_A0A177CYK7 Uncharacterized protein n=1 Tax=Paraphaeosphaeria sporulosa TaxID=1460663 RepID=A0A177CYK7_9PLEO	No hit	0	0	1	No hit	0
AF_DN65748_c0_g1	0.0575673	0.0393433	2.65727	Ascomycota	Ribosomal protein L32	UniRef90_H6BKR7 60S ribosomal protein L32 n=22 Tax=Chaetothyriales TaxID=34395 RepID=H6BKR7_EXODN	No hit	0.0431047	0.0297183	0.998628	No hit	0
AF_DN80981_c0_g1	0	0	2.65666	Ascomycota	NA	UniRef90_A0A0G2EPW5 Putative clock controled protein (Ccg-8) n=1 Tax=Phaeomoniella chlamydospora TaxID=158046 RepID=A0A0G2EPW5_9EURO	No hit	0	0	1	No hit	0
AF_DN94693_c0_g1	0	0	2.65275	Ascomycota	NA	UniRef90_A0A2D3UXH2 Glucosamine-6-phosphate isomerase n=1 Tax=Ramularia collo-cygni TaxID=112498 RepID=A0A2D3UXH2_9PEZI	No hit	0	0	1	No hit	0
AF_DN38182_c0_g1	0	0.0900133	2.65183	Ascomycota	NA	UniRef90_A0A0D2FVT8 Uncharacterized protein n=1 Tax=Phialophora americana TaxID=5601 RepID=A0A0D2FVT8_9EURO	ACD	0	0.0663973	0.997793	No hit	0
AF_DN68697_c0_g1	0	0	2.65041	Ascomycota	NA	UniRef90_G2RG29 Uncharacterized protein n=1 Tax=Thielavia terrestris (strain ATCC 38088 / NRRL 8126) TaxID=578455 RepID=G2RG29_THITE	No hit	0	0	1	No hit	0
AF_DN55718_c0_g1	0	0	2.64987	Ascomycota	NA	UniRef90_A0A2H3IHL6 Uncharacterized protein n=1 Tax=Penicillium occitanis TaxID=290292 RepID=A0A2H3IHL6_9EURO	No hit	0	0	1	No hit	0
AF_DN40876_c0_g1	0	0	2.64793	Basidiomycota	NA	UniRef90_A0A165I2U6 Uncharacterized protein n=1 Tax=Exidia glandulosa HHB12029 TaxID=1314781 RepID=A0A165I2U6_EXIGL	No hit	0	0	1	No hit	0
AF_DN76005_c0_g1	0	0	2.64757	Ascomycota	NA	UniRef90_E5A1Q4 Uncharacterized protein n=1 Tax=Leptosphaeria maculans (strain JN3 / isolate v23.1.3 / race Av1-4-5-6-7-8)TaxID=985895 RepID=E5A1Q4_LEPMJ	No hit	0	0	1	No hit	0
AF_DN27674_c0_g1	0	0.00676923	2.64571	Ascomycota	Zinc finger and BTB domain-containing protein	UniRef90_A0A225AJG2 Uncharacterized protein n=1 Tax=Talaromyces atroroseus TaxID=1441469 RepID=A0A225AJG2_9EURO	No hit	0	0.00521535	0.999986	No hit	0
AF_DN87806_c0_g1	0	0	2.64486	Ascomycota	NA	UniRef90_A0A1Y2MDW9 Uncharacterized protein n=1 Tax=Epicoccum nigrum TaxID=105696 RepID=A0A1Y2MDW9_EPING	No hit	0	0	1	No hit	0
AF_DN1852_c0_g1	0	0.051112	2.64442	Ascomycota	NA	UniRef90_A0A1Y2A424 Intradiol ring-cleavage dioxygenase n=1 Tax=Clohesyomyces aquaticus TaxID=1231657 RepID=A0A1Y2A424_9PLEO	No hit	0	0.0385182	0.999258	No hit	0
AF_DN28470_c0_g1	0	0	2.64426	Ascomycota	NA	UniRef90_A0A0F4YZP7 Translation elongation factor eEF-3 n=1 Tax=Rasamsonia emersonii CBS 393.64 TaxID=1408163 RepID=A0A0F4YZP7_TALEM	No hit	0	0	1	No hit	0
AF_DN96072_c0_g1	0	0	2.64165	No hit found	NA	No hits	No hit	0	0	1	No hit	0
AF_DN54755_c0_g1	0	0	2.63559	Ascomycota	Hsp20 alpha crystallin family protein (Fragment)	UniRef90_A0A010RWT3 Uncharacterized protein (Fragment) n=3 Tax=Colletotrichum TaxID=5455 RepID=A0A010RWT3_9PEZI	ACD	0	0	1	No hit	0
AF_DN68999_c0_g1	0	0.00557977	2.63355	Ascomycota	Plasma membrane fusion involved in cytogamy	UniRef90_A0A1Y2A9R8 Uncharacterized protein n=1 Tax=Clohesyomyces aquaticus TaxID=1231657 RepID=A0A1Y2A9R8_9PLEO	No hit	0	0.00431263	0.999991	No hit	0
AF_DN99593_c0_g1	0	0	2.63153	Basidiomycota	NA	UniRef90_G4TH99 Uncharacterized protein n=1 Tax=Serendipita indica (strain DSM 11827) TaxID=1109443 RepID=G4TH99_SERID	No hit	0	0	1	No hit	0
AF_DN67748_c0_g1	0	0	2.62897	Ascomycota	NA	UniRef90_A0A1Y1YFY6 Glycosyl hydrolases family 16-domain-containing protein n=1 Tax=Clohesyomyces aquaticus TaxID=1231657 RepID=A0A1Y1YFY6_9PLEO	No hit	0	0	1	No hit	0
AF_DN75072_c0_g1	0	0	2.62642	Ascomycota	NA	UniRef90_A0A225AYE1 Uncharacterized protein n=1 Tax=Talaromyces atroroseus TaxID=1441469 RepID=A0A225AYE1_9EURO	No hit	0	0	1	No hit	0
AF_DN105591_c0_g1	0	0	2.62628	Ascomycota	NA	UniRef90_B8M5L0 BZIP transcription factor (AtfA), putative n=3 Tax=Eurotiales TaxID=5042 RepID=B8M5L0_TALSN	No hit	0	0	1	No hit	0
AF_DN42166_c1_g3	0	0.023805	2.62442	Basidiomycota	NA	No hits	No hit	0	0.0182669	0.999833	No hit	0
AF_DN6546_c0_g1	0	0	2.62263	Basidiomycota	Citrate synthase	UniRef90_A0A165PYU4 Citrate synthase (Fragment) n=1 Tax=Exidia glandulosa HHB12029 TaxID=1314781 RepID=A0A165PYU4_EXIGL	No hit	0	0	1	No hit	0
AF_DN87254_c0_g1	0	0	2.62242	Other fungi	Small subunit ribosomal protein S13e	UniRef90_A0A1X2H604 40S ribosomal protein S13 n=2 Tax=Syncephalastrum racemosum TaxID=13706 RepID=A0A1X2H604_SYNRA	No hit	0	0	1	No hit	0
AF_DN56730_c0_g1	0	0.0232303	2.62235	Ascomycota	MFS general substrate transporter	UniRef90_A0A0G2EEL7 Putative mfs multidrug n=1 Tax=Phaeomoniella chlamydospora TaxID=158046 RepID=A0A0G2EEL7_9EURO	No hit	0	0.0178389	0.999841	No hit	SP(Sec/SPI)
AF_DN16899_c0_g1	0	0	2.62203	Ascomycota	NA	UniRef90_W2RXC9 Uncharacterized protein n=1 Tax=Cyphellophora europaea CBS 101466 TaxID=1220924 RepID=W2RXC9_9EURO	No hit	0	0	1	No hit	0
AF_DN932_c0_g1	0	0.00808967	2.62159	Basidiomycota	Zinc finger homeobox protein 3	UniRef90_A0A0H2RP97 Uncharacterized protein n=1 Tax=Schizopora paradoxa TaxID=27342 RepID=A0A0H2RP97_9HOMO	No hit	0	0.00626069	0.99998	No hit	0
AF_DN82641_c0_g1	0	0	2.62084	Ascomycota	Putative aspartic-type endopeptidase opsB	UniRef90_A0A0N1P2S4 Putative aspartic-type endopeptidase OPSB n=1 Tax=Phialophora attae TaxID=1664694 RepID=A0A0N1P2S4_9EURO	No hit	0	0	1	No hit	0
AF_DN88063_c0_g1	0	0.0314244	2.61993	Basidiomycota	Transporter	UniRef90_A0A1B7NGR2 Uncharacterized protein n=1 Tax=Rhizopogon vinicolor AM-OR11-026 TaxID=1314800 RepID=A0A1B7NGR2_9HOMO	No hit	0	0.0240443	0.999711	No hit	0
AF_DN107515_c0_g1	0	0	2.61805	Ascomycota	NA	UniRef90_A0A225B3J1 Uncharacterized protein n=1 Tax=Talaromyces atroroseus TaxID=1441469 RepID=A0A225B3J1_9EURO	No hit	0	0	1	No hit	0
AF_DN88327_c0_g1	0	0	2.61746	Ascomycota	60S ribosomal protein L2	UniRef90_C8VN22 Uncharacterized protein n=24 Tax=leotiomyceta TaxID=716546 RepID=C8VN22_EMENI	No hit	0	0	1	No hit	0
AF_DN69014_c0_g1	0	0	2.61698	Basidiomycota	NA	UniRef90_A0A066W3J7 Uncharacterized protein (Fragment) n=1 Tax=Rhizoctonia solani AG-8 WAC10335 TaxID=1287689 RepID=A0A066W3J7_9HOMO	No hit	0	0	1	No hit	0
AF_DN22949_c0_g1	0	0	2.61529	Ascomycota	Heat-shock protein Hsp98	UniRef90_A0A177C215 Heat shock protein-like protein n=1 Tax=Paraphaeosphaeria sporulosa TaxID=1460663 RepID=A0A177C215_9PLEO	Hsp100	0	0	1	No hit	0
AF_DN83644_c0_g1	0	0	2.61481	Other fungi	NA	UniRef90_A0A165NQE7 Uncharacterized protein n=1 Tax=Exidia glandulosa HHB12029 TaxID=1314781 RepID=A0A165NQE7_EXIGL	No hit	0	0	1	No hit	0
AF_DN66215_c0_g1	0	0	2.61412	Ascomycota	NAD dependent epimerase/dehydratase	UniRef90_A0A0S6XVZ9 Uncharacterized protein n=1 Tax=fungal sp. No.11243 TaxID=1603295 RepID=A0A0S6XVZ9_9FUNG	No hit	0	0	1	No hit	0
AF_DN85535_c0_g1	0	0	2.61316	Ascomycota	NA	UniRef90_A0A1Y1YAV2 Transcription factor PAP1 (Fragment) n=1 Tax=Clohesyomyces aquaticus TaxID=1231657 RepID=A0A1Y1YAV2_9PLEO	No hit	0	0	1	No hit	0
AF_DN69239_c0_g1	0	0	2.61178	Ascomycota	Protein phosphatase type 1 complex subunit Hex2/Reg1	UniRef90_A0A177CN88 Uncharacterized protein n=1 Tax=Paraphaeosphaeria sporulosa TaxID=1460663 RepID=A0A177CN88_9PLEO	No hit	0	0	1	No hit	0
AF_DN102404_c0_g1	0	0	2.61074	Basidiomycota	Putative vacuolar membrane protein YJR054W [Saccharomyces cerevisiae S288c]	UniRef90_A0A165R3M0 Uncharacterized protein n=1 Tax=Exidia glandulosa HHB12029 TaxID=1314781 RepID=A0A165R3M0_EXIGL	No hit	0	0	1	No hit	0
AF_DN20168_c0_g1	0	0	2.61073	Ascomycota	NA	UniRef90_A0A177CCF6 Uncharacterized protein (Fragment) n=1 Tax=Paraphaeosphaeria sporulosa TaxID=1460663 RepID=A0A177CCF6_9PLEO	No hit	0	0	1	No hit	0
AF_DN2627_c0_g1	0	0	2.60925	Basidiomycota	Ribosomal protein S3Ae	UniRef90_Q764D2 40S ribosomal protein S1 n=48 Tax=Agaricomycetes TaxID=155619 RepID=RS3A_LENED	No hit	0	0	1	No hit	0
AF_DN78032_c0_g1	0	0	2.60596	Basidiomycota	NA	UniRef90_A0A0C9UN70 Unplaced genomic scaffold SPHSTscaffold_189, whole genome shotgun sequence (Fragment) n=1 Tax=Sphaerobolus stellatus SS14 TaxID=990650 RepID=A0A0C9UN70_9HOMO	Hsp70	0	0	1	No hit	0
AF_DN100040_c0_g1	0	0	2.6033	Basidiomycota	NA	UniRef90_A0A0C3CAG4 Uncharacterized protein n=1 Tax=Hebeloma cylindrosporum h7 TaxID=686832 RepID=A0A0C3CAG4_HEBCY	No hit	0	0	1	No hit	0
AF_DN82990_c0_g1	0	0	2.60187	Ascomycota	NA	UniRef90_A0A194V5F5 Uncharacterized protein n=1 Tax=Valsa mali var. pyri TaxID=694573 RepID=A0A194V5F5_9PEZI	No hit	0	0	1	No hit	0
AF_DN92313_c0_g1	0	0	2.60085	Basidiomycota	NA	UniRef90_A0A165FTU6 Uncharacterized protein n=1 Tax=Exidia glandulosa HHB12029 TaxID=1314781 RepID=A0A165FTU6_EXIGL	No hit	0	0	1	GH128(110-331)	0
AF_DN56553_c0_g1	0	0	2.5992	Ascomycota	NA	UniRef90_B6Q7U6 UTP--glucose-1-phosphate uridylyltransferase n=8 Tax=Eurotiales TaxID=5042 RepID=B6Q7U6_TALMQ	No hit	0	0	1	No hit	0
AF_DN102142_c0_g1	0	0	2.59827	Ascomycota	BZIP family transcription factor	UniRef90_A0A1Y1ZUH0 Uncharacterized protein n=1 Tax=Clohesyomyces aquaticus TaxID=1231657 RepID=A0A1Y1ZUH0_9PLEO	No hit	0	0	1	No hit	0
AF_DN72747_c0_g1	0	0	2.59738	Ascomycota	NA	UniRef90_A0A2B7Y285 Uncharacterized protein n=1 Tax=Helicocarpus griseus UAMH5409 TaxID=1447875 RepID=A0A2B7Y285_9EURO	No hit	0	0	1	No hit	0
AF_DN101776_c0_g1	0	0	2.59729	Basidiomycota	NA	UniRef90_A0A0C3SA57 Uncharacterized protein n=1 Tax=Phlebiopsis gigantea 11061_1 CR5-6 TaxID=745531 RepID=A0A0C3SA57_PHLGI	No hit	0	0	1	No hit	0
AF_DN65844_c0_g1	0	0	2.59637	Basidiomycota	Translation elongation factor three (Fragment)	UniRef90_A0A165MF47 Uncharacterized protein n=1 Tax=Exidia glandulosa HHB12029 TaxID=1314781 RepID=A0A165MF47_EXIGL	No hit	0	0	1	No hit	0
AF_DN40537_c0_g1	0	0	2.5963	Ascomycota	NA	UniRef90_R7YNI5 Uncharacterized protein n=1 Tax=Coniosporium apollinis (strain CBS 100218) TaxID=1168221 RepID=R7YNI5_CONA1	No hit	0	0	1	No hit	0
AF_DN83161_c0_g1	0	0	2.59578	Ascomycota	Thiamine thiazole synthase	UniRef90_B8M1K3 Thiamine thiazole synthase n=6 Tax=Eurotiales TaxID=5042 RepID=B8M1K3_TALSN	No hit	0	0	1	No hit	0
AF_DN88928_c0_g1	0	0	2.59326	Ascomycota	40S ribosomal protein S7	UniRef90_G0RJ19 40S ribosomal protein S7 n=42 Tax=Fungi TaxID=4751 RepID=G0RJ19_HYPJQ	No hit	0	0	1	No hit	0
AF_DN17325_c0_g1	0	0	2.59245	Basidiomycota	NA	UniRef90_G4T9F6 Uncharacterized protein n=1 Tax=Serendipita indica (strain DSM 11827) TaxID=1109443 RepID=G4T9F6_SERID	ACD	0	0	1	No hit	0
AF_DN73752_c0_g1	0	0	2.59022	Ascomycota	Period circadian	UniRef90_R8BFW2 Putative period circadian protein n=1 Tax=Togninia minima (strain UCR-PA7) TaxID=1286976 RepID=R8BFW2_TOGMI	No hit	0	0	1	No hit	0
AF_DN101498_c0_g1	0	0	2.59004	No hit found	NA	No hits	No hit	0	0	1	No hit	0
AF_DN6548_c0_g1	0	0	2.58924	Basidiomycota	NA	UniRef90_A0A0H2S5P6 Uncharacterized protein n=1 Tax=Schizopora paradoxa TaxID=27342 RepID=A0A0H2S5P6_9HOMO	No hit	0	0	1	No hit	0
AF_DN82665_c0_g1	0	0.00699053	2.58827	Ascomycota	Btb poz domain-containing protein	UniRef90_A0A1Y2MC87 Uncharacterized protein n=1 Tax=Epicoccum nigrum TaxID=105696 RepID=A0A1Y2MC87_EPING	No hit	0	0.0054522	0.999985	No hit	0
AF_DN86708_c0_g1	0	0	2.58588	Ascomycota	NA	UniRef90_A0A1Y1ZHT8 Uncharacterized protein n=1 Tax=Clohesyomyces aquaticus TaxID=1231657 RepID=A0A1Y1ZHT8_9PLEO	No hit	0	0	1	No hit	0
AF_DN31613_c0_g1	0	0	2.58423	Ascomycota	Eukaryotic translation initiation factor 3 subunit G	UniRef90_R1GU77 Eukaryotic translation initiation factor 3 subunit G n=5 Tax=Botryosphaeriaceae TaxID=45131 RepID=R1GU77_BOTPV	No hit	0	0	1	No hit	0
AF_DN93632_c0_g1	0	0	2.58387	Ascomycota	Putative transcriptional regulator protein	UniRef90_A0A1Y1ZJN6 Uncharacterized protein n=1 Tax=Clohesyomyces aquaticus TaxID=1231657 RepID=A0A1Y1ZJN6_9PLEO	No hit	0	0	1	No hit	0
AF_DN55274_c0_g1	0	0.0061781	2.58352	Ascomycota	NA	UniRef90_A0A1Q5QBL8 Uncharacterized protein n=1 Tax=Talaromyces atroroseus TaxID=1441469 RepID=A0A1Q5QBL8_9EURO	No hit	0	0.00482551	0.999988	No hit	0
AF_DN56687_c0_g1	0	0	2.57776	Ascomycota	NA	UniRef90_A0A175W207 Cross-pathway control protein 1 n=1 Tax=Madurella mycetomatis TaxID=100816 RepID=A0A175W207_9PEZI	No hit	0	0	1	No hit	0
AF_DN84241_c0_g1	0	0	2.57228	Basidiomycota	NA	No hits	No hit	0	0	1	No hit	0
AF_DN56189_c0_g1	0	0	2.57215	Ascomycota	Glycoside hydrolase	UniRef90_A0A1C1D0V3 Putative glucan endo-1,3-beta-glucosidase eglC n=4 Tax=Herpotrichiellaceae TaxID=43219 RepID=A0A1C1D0V3_9EURO	No hit	0	0	1	GH17(19)	0
AF_DN65895_c0_g1	0	0	2.57089	Ascomycota	NA	UniRef90_B8M5M5 CP2 transcription factor, putative n=1 Tax=Talaromyces stipitatus (strain ATCC 10500 / CBS 375.48 / QM 6759/ NRRL 1006) TaxID=441959 RepID=B8M5M5_TALSN	No hit	0	0	1	No hit	0
AF_DN90439_c0_g1	0	0	2.56953	Ascomycota	NA	UniRef90_R7YNI5 Uncharacterized protein n=1 Tax=Coniosporium apollinis (strain CBS 100218) TaxID=1168221 RepID=R7YNI5_CONA1	No hit	0	0	1	No hit	0
AF_DN58243_c0_g1	0	0	2.5688	Basidiomycota	NA	UniRef90_A0A165ITZ8 Uncharacterized protein n=1 Tax=Exidia glandulosa HHB12029 TaxID=1314781 RepID=A0A165ITZ8_EXIGL	No hit	0	0	1	No hit	SP(Sec/SPI)
AF_DN65214_c0_g1	0	0	2.56838	Ascomycota	NA	UniRef90_W6ZIQ8 Uncharacterized protein n=7 Tax=Pleosporaceae TaxID=28556 RepID=W6ZIQ8_COCMI	No hit	0	0	1	No hit	0
AF_DN76802_c0_g1	0	0	2.56715	Ascomycota	NA	UniRef90_A0A1Y2A3M9 Uncharacterized protein n=1 Tax=Clohesyomyces aquaticus TaxID=1231657 RepID=A0A1Y2A3M9_9PLEO	No hit	0	0	1	No hit	0
AF_DN20439_c0_g1	0	0	2.56453	Basidiomycota	NA	UniRef90_A0A067SPX1 Extracellular metalloproteinase n=1 Tax=Galerina marginata (strain CBS 339.88) TaxID=685588 RepID=A0A067SPX1_GALM3	No hit	0	0	1	No hit	0
AF_DN106481_c0_g1	0	0.0921733	2.56255	Other fungi	Mismatch base pair and cruciform DNA recognition protein hmp1	UniRef90_U9TCH2 Mismatch base pair and cruciform DNA recognition protein hmp1 n=5 Tax=Rhizophagus irregularis TaxID=588596 RepID=U9TCH2_RHIID	No hit	0	0.0692324	0.997601	No hit	0
AF_DN75612_c0_g1	0	0	2.55986	Ascomycota	NA	UniRef90_A0A0G2DXS9 Putative cell wall glucanase n=1 Tax=Phaeomoniella chlamydospora TaxID=158046 RepID=A0A0G2DXS9_9EURO	No hit	0	0	1	No hit	0
AF_DN30266_c0_g1	0	0	2.55971	Ascomycota	NA	UniRef90_E5KJ91 Heat shock protein Hsp88 (Fragment) n=5 Tax=Pleosporaceae TaxID=28556 RepID=E5KJ91_9PLEO	Hsp70	0	0	1	No hit	0
AF_DN61347_c0_g1	0	0	2.55853	Ascomycota	NA	No hits	No hit	0	0	1	No hit	0
AF_DN58822_c0_g1	0	0	2.55793	Ascomycota	NA	UniRef90_A0A1Q5Q9Q5 Uncharacterized protein n=2 Tax=Eurotiales TaxID=5042 RepID=A0A1Q5Q9Q5_9EURO	No hit	0	0	1	No hit	0
AF_DN83064_c0_g1	0	0	2.55673	No hit found	NA	UniRef90_A0A0H2RPY8 Uncharacterized protein n=1 Tax=Schizopora paradoxa TaxID=27342 RepID=A0A0H2RPY8_9HOMO	No hit	0	0	1	No hit	0
AF_DN69677_c0_g1	0	0	2.55608	Ascomycota	NA	UniRef90_A0A1Y1YQ53 HSP20-like chaperone n=1 Tax=Clohesyomyces aquaticus TaxID=1231657 RepID=A0A1Y1YQ53_9PLEO	ACD	0	0	1	No hit	0
AF_DN93072_c0_g1	0	0	2.55533	Ascomycota	UTP-glucose-1-phosphate uridylyltransferase	UniRef90_Q0UEG9 UTP--glucose-1-phosphate uridylyltransferase n=3 Tax=Pleosporineae TaxID=715340 RepID=Q0UEG9_PHANO	No hit	0	0	1	No hit	0
AF_DN5670_c0_g1	0	0	2.55524	Ascomycota	NA	UniRef90_A0A1Y1Y4I7 PRELI-like family-domain-containing protein n=1 Tax=Clohesyomyces aquaticus TaxID=1231657 RepID=A0A1Y1Y4I7_9PLEO	No hit	0	0	1	No hit	0
AF_DN64745_c0_g1	0	0	2.55338	No hit found	Low affinity vacuolar monovalent cation/H(+) antiporter	No hits	No hit	0	0	1	No hit	0
AF_DN109120_c0_g1	0	0	2.55133	Ascomycota	NA	UniRef90_Q0UYB7 Uncharacterized protein n=1 Tax=Phaeosphaeria nodorum (strain SN15 / ATCC MYA-4574 / FGSC 10173) TaxID=321614 RepID=Q0UYB7_PHANO	No hit	0	0	1	No hit	0
AF_DN85514_c0_g1	0	0	2.55094	Ascomycota	NA	UniRef90_A0A0G2F3Q3 Putative eukaryotic translation initiation factor subunit eif-4f n=1 Tax=Phaeomoniella chlamydospora TaxID=158046 RepID=A0A0G2F3Q3_9EURO	No hit	0	0	1	No hit	0
AF_DN85429_c0_g1	0	0.0133196	2.55018	Ascomycota	NA	UniRef90_A0A177CLQ5 Uncharacterized protein n=1 Tax=Paraphaeosphaeria sporulosa TaxID=1460663 RepID=A0A177CLQ5_9PLEO	No hit	0	0.0104427	0.999945	No hit	0
AF_DN100440_c0_g1	0	0	2.54942	Ascomycota	Integral membrane	UniRef90_A0A1Y1Z8U2 Uncharacterized protein n=1 Tax=Clohesyomyces aquaticus TaxID=1231657 RepID=A0A1Y1Z8U2_9PLEO	No hit	0	0	1	No hit	0
AF_DN73234_c0_g1	0	0	2.54904	Ascomycota	Heat shock protein Hsp88	UniRef90_A0A0N1P357 Heat shock protein hsp88 n=2 Tax=Chaetothyriales TaxID=34395 RepID=A0A0N1P357_9EURO	Hsp70	0	0	1	No hit	0
AF_DN30564_c0_g1	0	0	2.54689	Ascomycota	Phosphatase regulatory subunit	UniRef90_A0A1Q5Q6S5 Uncharacterized protein n=1 Tax=Talaromyces atroroseus TaxID=1441469 RepID=A0A1Q5Q6S5_9EURO	No hit	0	0	1	CBM21(316-424)	0
AF_DN55080_c0_g1	0.0100972	0	2.54671	Ascomycota	Cruciform DNA-recognizing protein 1	UniRef90_A0A225AUV0 Uncharacterized protein n=1 Tax=Talaromyces atroroseus TaxID=1441469 RepID=A0A225AUV0_9EURO	No hit	0.0079353	0	0.999969	No hit	0
AF_DN86793_c0_g1	0	0	2.5443	Basidiomycota	Elongation factor 3 (Fragment)	UniRef90_A0A165AEV3 Uncharacterized protein n=2 Tax=Sistotremastrum TaxID=139133 RepID=A0A165AEV3_9HOMO	No hit	0	0	1	No hit	0
AF_DN3419_c0_g1	0	0	2.54254	Basidiomycota	Leptomycin B resistance protein pmd1 (Fragment)	UniRef90_B0CV33 Predicted protein n=2 Tax=Laccaria TaxID=29882 RepID=B0CV33_LACBS	No hit	0	0	1	No hit	0	gnl|TC-DB|O43140|3.A.1.201.11 Multidrug resistance protein 1 OS=Cryptococcus neoformans GN=mdr1 PE=2 SV=1	86.6242
AF_DN54653_c0_g1	0	0	2.54042	Basidiomycota	NA	UniRef90_A0A060S789 Uncharacterized protein n=1 Tax=Pycnoporus cinnabarinus TaxID=5643 RepID=A0A060S789_PYCCI	No hit	0	0	1	No hit	SP(Sec/SPI)
AF_DN67519_c0_g1	0	0	2.54024	Ascomycota	Thioredoxin	UniRef90_A0A225ACE8 Uncharacterized protein n=1 Tax=Talaromyces atroroseus TaxID=1441469 RepID=A0A225ACE8_9EURO	No hit	0	0	1	No hit	0
AF_DN8166_c0_g1	0	0	2.53948	Basidiomycota	NA	UniRef90_A0A165ZL90 Uncharacterized protein n=1 Tax=Exidia glandulosa HHB12029 TaxID=1314781 RepID=A0A165ZL90_EXIGL	No hit	0	0	1	No hit	0
AF_DN73614_c0_g1	0	0	2.53644	Ascomycota	NA	UniRef90_A0A1Y1ZPX6 Uncharacterized protein n=1 Tax=Clohesyomyces aquaticus TaxID=1231657 RepID=A0A1Y1ZPX6_9PLEO	No hit	0	0	1	No hit	0
AF_DN92532_c0_g1	0	0.0051627	2.53571	Ascomycota	NA	UniRef90_A0A0G2HFJ7 Uncharacterized protein n=1 Tax=Phaeomoniella chlamydospora TaxID=158046 RepID=A0A0G2HFJ7_9EURO	No hit	0	0.00407737	0.999992	No hit	0
AF_DN98789_c0_g1	0	0	2.53554	Ascomycota	NA	UniRef90_A0A1Y1ZTE4 Cross-pathway control protein 1 n=1 Tax=Clohesyomyces aquaticus TaxID=1231657 RepID=A0A1Y1ZTE4_9PLEO	No hit	0	0	1	No hit	0
AF_DN97846_c0_g1	0	0	2.53519	Ascomycota	NA	UniRef90_A0A0G2GNZ4 Putative aaa family atpase n=1 Tax=Phaeomoniella chlamydospora TaxID=158046 RepID=A0A0G2GNZ4_9EURO	Hsp100	0	0	1	No hit	0
AF_DN373_c0_g1	0	0	2.53432	Basidiomycota	RNA recognition motif domain-containing protein	UniRef90_A0A165DEM3 Uncharacterized protein n=1 Tax=Exidia glandulosa HHB12029 TaxID=1314781 RepID=A0A165DEM3_EXIGL	No hit	0	0	1	No hit	0
AF_DN54601_c0_g1	0	0	2.53149	No hit found	NA	No hits	No hit	0	0	1	No hit	0
AF_DN60049_c0_g1	0	0	2.53097	Ascomycota	Glutaredoxin	UniRef90_A0A2H3HYJ3 Glutaredoxin n=1 Tax=Penicillium occitanis TaxID=290292 RepID=A0A2H3HYJ3_9EURO	No hit	0	0	1	No hit	0
AF_DN66522_c0_g1	0	0	2.52979	Basidiomycota	NA	UniRef90_A0A0C3C6D9 Uncharacterized protein n=1 Tax=Hebeloma cylindrosporum h7 TaxID=686832 RepID=A0A0C3C6D9_HEBCY	No hit	0	0	1	No hit	0
AF_DN105472_c0_g1	0	0	2.52879	Ascomycota	NA	UniRef90_A0A1Y1ZTE4 Cross-pathway control protein 1 n=1 Tax=Clohesyomyces aquaticus TaxID=1231657 RepID=A0A1Y1ZTE4_9PLEO	No hit	0	0	1	No hit	0
AF_DN102973_c0_g1	0	0	2.52695	Basidiomycota	Elongation factor 1-gamma	UniRef90_A0A165GTE2 EEF1-gamma domain-containing protein n=1 Tax=Exidia glandulosa HHB12029 TaxID=1314781 RepID=A0A165GTE2_EXIGL	No hit	0	0	1	No hit	0
AF_DN64727_c0_g1	0	0	2.52452	Ascomycota	Murein transglycosylase	UniRef90_W2RMN1 Uncharacterized protein n=1 Tax=Cyphellophora europaea CBS 101466 TaxID=1220924 RepID=W2RMN1_9EURO	No hit	0	0	1	GH16(84-278)	SP(Sec/SPI)
AF_DN37864_c0_g1	0	0	2.5222	No hit found	NA	UniRef90_A0A067SV61 Uncharacterized protein n=1 Tax=Galerina marginata (strain CBS 339.88) TaxID=685588 RepID=A0A067SV61_GALM3	No hit	0	0	1	No hit	SP(Sec/SPI)
AF_DN76062_c0_g1	0.00760117	0	2.52184	Ascomycota	NA	UniRef90_W2SEQ4 Uncharacterized protein n=1 Tax=Cyphellophora europaea CBS 101466 TaxID=1220924 RepID=W2SEQ4_9EURO	No hit	0.0060146	0	0.999982	No hit	0
AF_DN101317_c0_g1	0	0	2.51968	Basidiomycota	NA	UniRef90_A0A0C2X605 Uncharacterized protein n=1 Tax=Serendipita vermifera MAFF 305830 TaxID=933852 RepID=A0A0C2X605_9HOMO	DnaJ	0	0	1	No hit	0
AF_DN105417_c0_g1	0	0	2.51754	Basidiomycota	NA	UniRef90_A0A165BBS5 Uncharacterized protein n=1 Tax=Exidia glandulosa HHB12029 TaxID=1314781 RepID=A0A165BBS5_EXIGL	No hit	0	0	1	No hit	0
AF_DN97092_c0_g1	0	0	2.5168	Ascomycota	NA	No hits	No hit	0	0	1	No hit	0
AF_DN105740_c0_g1	0	0	2.51626	Basidiomycota	Cupredoxin	UniRef90_A0A067TYP9 Uncharacterized protein n=1 Tax=Galerina marginata (strain CBS 339.88) TaxID=685588 RepID=A0A067TYP9_GALM3	No hit	0	0	1	No hit	0
AF_DN57654_c0_g1	0	0	2.51536	Basidiomycota	NA	No hits	No hit	0	0	1	No hit	0
AF_DN96742_c0_g1	0	0.00683757	2.51503	Ascomycota	NA	UniRef90_G2R943 Uncharacterized protein n=1 Tax=Thielavia terrestris (strain ATCC 38088 / NRRL 8126) TaxID=578455 RepID=G2R943_THITE	No hit	0	0.00542079	0.999985	No hit	0
AF_DN93658_c0_g1	0	0	2.51381	Basidiomycota	NA	UniRef90_A0A0C9UN70 Unplaced genomic scaffold SPHSTscaffold_189, whole genome shotgun sequence (Fragment) n=1 Tax=Sphaerobolus stellatus SS14 TaxID=990650 RepID=A0A0C9UN70_9HOMO	Hsp70	0	0	1	No hit	0
AF_DN67214_c0_g1	0	0	2.51375	No hit found	NA	No hits	No hit	0	0	1	No hit	0
AF_DN106107_c0_g1	0	0	2.51296	Ascomycota	Oligopeptide transporter	UniRef90_A0A194UWM0 Peptide transporter PTR2 n=2 Tax=Valsa mali TaxID=105487 RepID=A0A194UWM0_9PEZI	No hit	0	0	1	No hit	0
AF_DN56218_c0_g1	0	0	2.51007	Ascomycota	NA	No hits	No hit	0	0	1	No hit	0
AF_DN58820_c0_g1	0	0	2.50957	Basidiomycota	NA	UniRef90_A0A0H2SJE2 Phosphate permease n=1 Tax=Schizopora paradoxa TaxID=27342 RepID=A0A0H2SJE2_9HOMO	No hit	0	0	1	No hit	0	gnl|TC-DB|K4HTY2|2.A.1.9.11 Phosphate transporter OS=Boletus edulis GN=PT PE=2 SV=1	75.7282
AF_DN98444_c0_g1	0	0	2.50914	Ascomycota	NA	UniRef90_A0A1Q5QA79 Uncharacterized protein n=1 Tax=Talaromyces atroroseus TaxID=1441469 RepID=A0A1Q5QA79_9EURO	No hit	0	0	1	No hit	0
AF_DN102780_c0_g1	0	0	2.50876	No hit found	NA	UniRef90_A0A0G2E317 Putative calcineurin binding protein n=1 Tax=Phaeomoniella chlamydospora TaxID=158046 RepID=A0A0G2E317_9EURO	No hit	0	0	1	No hit	0
AF_DN102428_c0_g1	0	0	2.50873	Ascomycota	Alpha-1,3-glucan synthase (Fragment)	UniRef90_A0A0D2BCD3 Uncharacterized protein n=2 Tax=Exophiala TaxID=5583 RepID=A0A0D2BCD3_9EURO	No hit	0	0	1	GT5(22)	0
AF_DN103026_c0_g1	0	0	2.50858	Ascomycota	Heat shock protein Hsp20	UniRef90_A0A1B7NV17 Uncharacterized protein n=1 Tax=Emmonsia sp. CAC-2015a TaxID=1658172 RepID=A0A1B7NV17_9EURO	ACD	0	0	1	No hit	0
AF_DN103864_c0_g1	0	0	2.50763	Basidiomycota	NA	UniRef90_A0A165QQ59 5-aminolevulinate synthase n=1 Tax=Exidia glandulosa HHB12029 TaxID=1314781 RepID=A0A165QQ59_EXIGL	No hit	0	0	1	No hit	0
AF_DN86858_c0_g1	0	0	2.50712	Basidiomycota	Pyruvate dehydrogenase kinase	UniRef90_A0A0H2RQ03 Alpha-ketoacid dehydrogenase kinase n=1 Tax=Schizopora paradoxa TaxID=27342 RepID=A0A0H2RQ03_9HOMO	No hit	0	0	1	No hit	0
AF_DN57091_c0_g1	0	0	2.50703	Ascomycota	Mismatched base pair and cruciform DNA recognition	UniRef90_B2WIQ1 Uncharacterized protein n=2 Tax=Pyrenophora TaxID=5027 RepID=B2WIQ1_PYRTR	No hit	0	0	1	No hit	0
AF_DN56493_c0_g1	0	0	2.50494	Ascomycota	NA	UniRef90_A0A0D2KK23 Uncharacterized protein n=9 Tax=Herpotrichiellaceae TaxID=43219 RepID=A0A0D2KK23_9EURO	No hit	0	0	1	No hit	0
AF_DN91897_c0_g1	0	0	2.50414	Ascomycota	NA	UniRef90_V5HWH5 LEA domain protein n=1 Tax=Byssochlamys spectabilis (strain No. 5 / NBRC 109023) TaxID=1356009 RepID=V5HWH5_BYSSN	No hit	0	0	1	No hit	0
AF_DN27960_c0_g1	0.0071942	0	2.50259	Ascomycota	NA	UniRef90_W2SBS9 Uncharacterized protein n=1 Tax=Cyphellophora europaea CBS 101466 TaxID=1220924 RepID=W2SBS9_9EURO	No hit	0.00571864	0	0.999984	No hit	0
AF_DN83421_c0_g1	0	0	2.50254	Ascomycota	Had superfamily	UniRef90_A0A225BAQ8 Uncharacterized protein n=2 Tax=Talaromyces TaxID=5094 RepID=A0A225BAQ8_9EURO	No hit	0	0	1	No hit	0
AF_DN62552_c0_g1	0	0	2.50252	Ascomycota	NA	UniRef90_A0A1Y1WN35 Uncharacterized protein n=1 Tax=Linderina pennispora TaxID=61395 RepID=A0A1Y1WN35_9FUNG	No hit	0	0	1	AA9(2-110)	0
AF_DN106266_c0_g1	0	0	2.50237	Ascomycota	Translation elongation factor 3 (Fragment)	UniRef90_A0A0D2E1E2 Uncharacterized protein n=3 Tax=Exophiala TaxID=5583 RepID=A0A0D2E1E2_9EURO	No hit	0	0	1	No hit	0
AF_DN94253_c0_g1	0	0	2.50112	Basidiomycota	NA	UniRef90_A0A165MDS1 Uncharacterized protein n=1 Tax=Exidia glandulosa HHB12029 TaxID=1314781 RepID=A0A165MDS1_EXIGL	No hit	0	0	1	No hit	0
AF_DN102534_c0_g1	0	0	2.50062	Ascomycota	NA	UniRef90_A0A0B8N4N0 BZIP transcription factor n=1 Tax=Talaromyces cellulolyticus TaxID=1472165 RepID=A0A0B8N4N0_9EURO	No hit	0	0	1	No hit	0
AF_DN64561_c0_g1	0	0	2.50058	Basidiomycota	6-phosphogluconate dehydrogenase	UniRef90_A0A151WDF7 6-phosphogluconate dehydrogenase, decarboxylating 2 n=1 Tax=Hypsizygus marmoreus TaxID=39966 RepID=A0A151WDF7_HYPMA	No hit	0	0	1	No hit	0
AF_DN106984_c0_g1	0	0	2.49857	Ascomycota	NA	UniRef90_A0A067SDT3 Uncharacterized protein n=1 Tax=Galerina marginata (strain CBS 339.88) TaxID=685588 RepID=A0A067SDT3_GALM3	No hit	0	0	1	No hit	0
AF_DN84218_c0_g1	0	0	2.49736	No hit found	NA	No hits	No hit	0	0	1	No hit	0
AF_DN107075_c0_g1	0	0.0241423	2.49712	Ascomycota	Iron binding protein involved in Fe-S cluster formation	UniRef90_A0A177C9S7 Iron sulfur cluster assembly protein 1, mitochondrial n=1 Tax=Paraphaeosphaeria sporulosa TaxID=1460663 RepID=A0A177C9S7_9PLEO	No hit	0	0.0190514	0.999819	No hit	0
AF_DN84847_c0_g1	0	0	2.49503	Ascomycota	NA	No hits	No hit	0	0	1	No hit	0
AF_DN85332_c0_g1	0	0	2.49465	Ascomycota	NA	UniRef90_A0A1Q5Q6N7 Catalase-peroxidase n=1 Tax=Talaromyces atroroseus TaxID=1441469 RepID=A0A1Q5Q6N7_9EURO	No hit	0	0	1	No hit	0
AF_DN55299_c0_g1	0	0.00658843	2.49288	Ascomycota	NA	UniRef90_A0A178E206 Uncharacterized protein n=1 Tax=Pyrenochaeta sp. DS3sAY3a TaxID=765867 RepID=A0A178E206_9PLEO	No hit	0	0.00525034	0.999986	No hit	0
AF_DN101717_c0_g1	0	0	2.49248	Basidiomycota	NA	UniRef90_A0A067TF62 Uncharacterized protein n=1 Tax=Galerina marginata (strain CBS 339.88) TaxID=685588 RepID=A0A067TF62_GALM3	No hit	0	0	1	No hit	0
AF_DN73471_c0_g1	0	0	2.49017	Basidiomycota	NA	UniRef90_A0A0H2S101 Uncharacterized protein n=1 Tax=Schizopora paradoxa TaxID=27342 RepID=A0A0H2S101_9HOMO	No hit	0	0	1	No hit	0
AF_DN96525_c1_g1	0	0	2.48991	Ascomycota	Cross-pathway control protein 1	UniRef90_A0A177D0A2 Uncharacterized protein n=1 Tax=Paraphaeosphaeria sporulosa TaxID=1460663 RepID=A0A177D0A2_9PLEO	No hit	0	0	1	No hit	0
AF_DN70492_c0_g1	0	0.0197823	2.48981	Ascomycota	NA	No hits	No hit	0	0.0156713	0.999877	No hit	0
AF_DN106556_c0_g1	0	0	2.48951	Ascomycota	NA	UniRef90_A0A1Y1ZIH7 Heat shock protein Hsp88 n=1 Tax=Clohesyomyces aquaticus TaxID=1231657 RepID=A0A1Y1ZIH7_9PLEO	Hsp70	0	0	1	No hit	0
AF_DN69190_c0_g1	0	0.021504	2.48789	No hit found	NA	UniRef90_A0A178EAM2 Uncharacterized protein n=1 Tax=Pyrenochaeta sp. DS3sAY3a TaxID=765867 RepID=A0A178EAM2_9PLEO	No hit	0	0.017028	0.999855	No hit	0
AF_DN5962_c0_g1	0	0	2.48754	Basidiomycota	NA	No hits	No hit	0	0	1	No hit	0
AF_DN19122_c0_g1	0	0	2.48401	Basidiomycota	NA	No hits	No hit	0	0	1	No hit	0
AF_DN98842_c0_g1	0	0	2.48191	Ascomycota	NA	No hits	No hit	0	0	1	No hit	0
AF_DN33255_c0_g1	0	0	2.48042	Basidiomycota	Extracellular metalloproteinase	UniRef90_A0A067SPX1 Extracellular metalloproteinase n=1 Tax=Galerina marginata (strain CBS 339.88) TaxID=685588 RepID=A0A067SPX1_GALM3	No hit	0	0	1	No hit	0
AF_DN16230_c0_g1	0	0.037257	2.47925	Basidiomycota	NA	UniRef90_A0A0D2NGY3 Uncharacterized protein n=1 Tax=Hypholoma sublateritium FD-334 SS-4 TaxID=945553 RepID=A0A0D2NGY3_9AGAR	No hit	0	0.0293259	0.99957	No hit	0
AF_DN85694_c0_g1	0	0	2.47733	Ascomycota	NA	UniRef90_B8ME74 C2H2 transcription factor (Seb1), putative n=1 Tax=Talaromyces stipitatus (strain ATCC 10500 / CBS 375.48/ QM 6759 / NRRL 1006) TaxID=441959 RepID=B8ME74_TALSN	No hit	0	0	1	No hit	0
AF_DN76742_c0_g1	0	0	2.4759	Ascomycota	NA	UniRef90_D5GER4 Uncharacterized protein n=1 Tax=Tuber melanosporum (strain Mel28) TaxID=656061 RepID=D5GER4_TUBMM	No hit	0	0	1	No hit	0
AF_DN56278_c0_g1	0	0	2.47397	Ascomycota	1,3-beta-glucanosyltransferase	UniRef90_A0A1Y2AAD8 1,3-beta-glucanosyltransferase n=1 Tax=Clohesyomyces aquaticus TaxID=1231657 RepID=A0A1Y2AAD8_9PLEO	No hit	0	0	1	GH72(54-351)	0
AF_DN94212_c0_g1	0	0	2.47135	Ascomycota	NA	UniRef90_Q2GQW8 Vacuolar protease A n=2 Tax=Sordariales TaxID=5139 RepID=Q2GQW8_CHAGB	No hit	0	0	1	No hit	0
AF_DN104593_c0_g1	0	0	2.47091	Ascomycota	NA	UniRef90_E4ZPM2 Uncharacterized protein n=1 Tax=Leptosphaeria maculans (strain JN3 / isolate v23.1.3 / race Av1-4-5-6-7-8)TaxID=985895 RepID=E4ZPM2_LEPMJ	No hit	0	0	1	No hit	0
AF_DN21521_c0_g1	0	0	2.47006	Ascomycota	NA	UniRef90_B6Q4P2 Uncharacterized protein n=1 Tax=Talaromyces marneffei (strain ATCC 18224 / CBS 334.59 / QM 7333) TaxID=441960 RepID=B6Q4P2_TALMQ	No hit	0	0	1	No hit	0
AF_DN95295_c0_g1	0	0	2.46946	Ascomycota	NA	UniRef90_Q0UFP5 Uncharacterized protein n=1 Tax=Phaeosphaeria nodorum (strain SN15 / ATCC MYA-4574 / FGSC 10173) TaxID=321614 RepID=Q0UFP5_PHANO	No hit	0	0	1	No hit	0
AF_DN106051_c0_g1	0	0	2.46861	Basidiomycota	NA	UniRef90_A0A0D2PRH0 Uncharacterized protein n=1 Tax=Hypholoma sublateritium FD-334 SS-4 TaxID=945553 RepID=A0A0D2PRH0_9AGAR	No hit	0	0	1	No hit	0
AF_DN102816_c0_g1	0	0	2.46775	Ascomycota	Polysaccharide deacetylase	UniRef90_A0A1Y1YD05 Glycosyl hydrolase n=1 Tax=Clohesyomyces aquaticus TaxID=1231657 RepID=A0A1Y1YD05_9PLEO	No hit	0	0	1	CE4(13-135)	0
AF_DN102701_c0_g1	0	0	2.46568	Ascomycota	NA	UniRef90_A0A1Q5QAH7 Uncharacterized protein n=1 Tax=Talaromyces atroroseus TaxID=1441469 RepID=A0A1Q5QAH7_9EURO	No hit	0	0	1	No hit	0
AF_DN105938_c0_g1	0	0	2.4651	Basidiomycota	NA	UniRef90_A0A165GJK9 Thioredoxin-like protein n=1 Tax=Exidia glandulosa HHB12029 TaxID=1314781 RepID=A0A165GJK9_EXIGL	No hit	0	0	1	No hit	0
AF_DN65055_c0_g1	0	0	2.46298	Ascomycota	NA	No hits	No hit	0	0	1	No hit	0
AF_DN102099_c0_g1	0	0	2.46247	Ascomycota	NA	UniRef90_A0A1Y1Y5J9 Pentatricopeptide repeat protein n=1 Tax=Clohesyomyces aquaticus TaxID=1231657 RepID=A0A1Y1Y5J9_9PLEO	No hit	0	0	1	No hit	0
AF_DN58875_c0_g1	0	0	2.46139	Basidiomycota	NA	UniRef90_A0A0H2S8G8 Ras-domain-containing protein n=1 Tax=Schizopora paradoxa TaxID=27342 RepID=A0A0H2S8G8_9HOMO	No hit	0	0	1	No hit	0
AF_DN20113_c0_g1	0	0	2.46102	Ascomycota	NA	UniRef90_A0A093VJI2 Adhesion defective protein 3 n=1 Tax=Talaromyces marneffei PM1 TaxID=1077442 RepID=A0A093VJI2_TALMA	No hit	0	0	1	No hit	0
AF_DN84175_c0_g1	0	0	2.45927	Basidiomycota	Cell division control protein 10	UniRef90_A0A165F3D6 Cell division/GTP binding protein n=1 Tax=Exidia glandulosa HHB12029 TaxID=1314781 RepID=A0A165F3D6_EXIGL	No hit	0	0	1	No hit	0
AF_DN19210_c1_g1	0.048764	0	2.45802	Basidiomycota	DNA-(Apurinic or apyrimidinic site) lyase	UniRef90_A0A0C3C085 Uncharacterized protein n=1 Tax=Piloderma croceum F 1598 TaxID=765440 RepID=A0A0C3C085_9HOMO	No hit	0.0383473	0	0.999264	No hit	SP(Sec/SPI)
AF_DN108066_c0_g1	0	0	2.458	Basidiomycota	NADH-quinone oxidoreductase	UniRef90_A0A0D2PHF6 Benzoquinone reductase n=1 Tax=Hypholoma sublateritium FD-334 SS-4 TaxID=945553 RepID=A0A0D2PHF6_9AGAR	No hit	0	0	1	AA6(2-141)	0
AF_DN23627_c0_g1	0	0	2.45745	No hit found	NA	UniRef90_A0A165KEY4 Uncharacterized protein n=1 Tax=Exidia glandulosa HHB12029 TaxID=1314781 RepID=A0A165KEY4_EXIGL	No hit	0	0	1	No hit	0
AF_DN23068_c0_g1	0	0	2.4566	Basidiomycota	NA	UniRef90_A0A165AWJ2 Uncharacterized protein (Fragment) n=1 Tax=Exidia glandulosa HHB12029 TaxID=1314781 RepID=A0A165AWJ2_EXIGL	No hit	0	0	1	No hit	0
AF_DN65970_c0_g1	0	0	2.45445	Basidiomycota	Extracellular serine-rich	UniRef90_A0A067TED1 Uncharacterized protein n=1 Tax=Galerina marginata (strain CBS 339.88) TaxID=685588 RepID=A0A067TED1_GALM3	No hit	0	0	1	No hit	0
AF_DN70555_c0_g1	0	0	2.45401	No hit found	NA	No hits	No hit	0	0	1	No hit	0
AF_DN61571_c0_g1	0	0	2.45365	Ascomycota	NA	UniRef90_A0A1Y2A3M9 Uncharacterized protein n=1 Tax=Clohesyomyces aquaticus TaxID=1231657 RepID=A0A1Y2A3M9_9PLEO	No hit	0	0	1	No hit	0
AF_DN17258_c0_g1	0	0	2.45286	Basidiomycota	Luminal-binding protein (Fragment)	UniRef90_A0A067N792 Uncharacterized protein n=1 Tax=Pleurotus ostreatus PC15 TaxID=1137138 RepID=A0A067N792_PLEOS	Hsp70	0	0	1	No hit	0	gnl|TC-DB|P11021|1.A.33.1.5 78 kDa glucose-regulated protein OS=Homo sapiens GN=HSPA5 PE=1 SV=2	72.7273
AF_DN73615_c0_g1	0	0	2.45134	Ascomycota	Stress-induced bacterial acidophilic repeat domain-containing protein (Fragment)	UniRef90_A0A177BYB1 Uncharacterized protein n=1 Tax=Paraphaeosphaeria sporulosa TaxID=1460663 RepID=A0A177BYB1_9PLEO	No hit	0	0	1	No hit	0
AF_DN89554_c0_g1	0	0	2.45001	Ascomycota	NA	UniRef90_A0A1Y1ZJK6 General substrate transporter n=1 Tax=Clohesyomyces aquaticus TaxID=1231657 RepID=A0A1Y1ZJK6_9PLEO	No hit	0	0	1	No hit	0
AF_DN55157_c0_g1	0	0	2.44988	Basidiomycota	NA	UniRef90_A0A0L6WRX0 Uncharacterized protein n=1 Tax=Termitomyces sp. J132 TaxID=1306850 RepID=A0A0L6WRX0_9AGAR	No hit	0	0	1	No hit	SP(Sec/SPI)
AF_DN74721_c0_g1	0	0	2.44932	Basidiomycota	NA	No hits	No hit	0	0	1	No hit	0
AF_DN96613_c0_g1	0	0	2.44769	Ascomycota	NA	UniRef90_A0A225AHL4 Uncharacterized protein n=1 Tax=Talaromyces atroroseus TaxID=1441469 RepID=A0A225AHL4_9EURO	No hit	0	0	1	No hit	0
AF_DN104366_c0_g1	0	0	2.44491	Other fungi	Extracellular serine-rich protein	UniRef90_A0A1D1YLE9 Blue copper protein n=1 Tax=Anthurium amnicola TaxID=1678845 RepID=A0A1D1YLE9_9ARAE	No hit	0	0	1	No hit	0
AF_DN37751_c0_g1	0	0	2.44475	Basidiomycota	NA	No hits	No hit	0	0	1	No hit	0
AF_DN77584_c0_g1	0	0	2.44355	Basidiomycota	Plasma membrane H+-transporting ATPase	UniRef90_W4JW57 Plasma membrane ATPase n=2 Tax=Russulales TaxID=452342 RepID=W4JW57_9HOMO	No hit	0	0	1	No hit	0
AF_DN62100_c0_g1	0	0	2.44161	Basidiomycota	Glyceraldehyde 3-phosphate dehydrogenase	UniRef90_M2PGK2 Glyceraldehyde-3-phosphate dehydrogenase n=2 Tax=Polyporales TaxID=5303 RepID=M2PGK2_CERS8	No hit	0	0	1	No hit	0
AF_DN27533_c0_g1	0	0	2.4416	Basidiomycota	Glycoside hydrolase family 16	UniRef90_W4KRH8 Glycoside hydrolase family 16 protein n=1 Tax=Heterobasidion irregulare TC 32-1 TaxID=747525 RepID=W4KRH8_9HOMO	No hit	0	0	1	GH16(32-261)	0
AF_DN5403_c0_g1	0	0	2.44077	Ascomycota	Nucleotide-binding, alpha-beta plait	UniRef90_K2QM25 Uncharacterized protein n=4 Tax=Botryosphaeriaceae TaxID=45131 RepID=K2QM25_MACPH	No hit	0	0	1	No hit	0
AF_DN106692_c0_g1	0	0	2.43983	Ascomycota	NA	UniRef90_A0A0L1I1Z8 Cell division control protein 48 n=20 Tax=Dothideomycetes TaxID=147541 RepID=A0A0L1I1Z8_9PLEO	No hit	0	0	1	No hit	0	gnl|TC-DB|P25694|3.A.16.1.2 Cell division control protein 48 - Saccharomyces cerevisiae (Baker's yeast).	90.991
AF_DN74716_c0_g1	0	0	2.43888	Basidiomycota	NA	UniRef90_A0A0D2KTQ9 Uncharacterized protein n=1 Tax=Hypholoma sublateritium FD-334 SS-4 TaxID=945553 RepID=A0A0D2KTQ9_9AGAR	No hit	0	0	1	No hit	0	gnl|TC-DB|O43140|3.A.1.201.11 Multidrug resistance protein 1 OS=Cryptococcus neoformans GN=mdr1 PE=2 SV=1	70.339
AF_DN19939_c0_g1	0	0	2.43862	Basidiomycota	Malate dehydrogenase	UniRef90_A0A0H2RCV1 Malate dehydrogenase n=1 Tax=Schizopora paradoxa TaxID=27342 RepID=A0A0H2RCV1_9HOMO	No hit	0	0	1	No hit	0
AF_DN69110_c0_g1	0	0	2.43862	Ascomycota	NA	UniRef90_A0A177CN29 Kinase-like protein n=1 Tax=Paraphaeosphaeria sporulosa TaxID=1460663 RepID=A0A177CN29_9PLEO	No hit	0	0	1	No hit	0
AF_DN69025_c0_g1	0	0	2.43728	Ascomycota	NA	No hits	No hit	0	0	1	No hit	0
AF_DN59820_c0_g1	0	0	2.43719	Basidiomycota	NA	No hits	No hit	0	0	1	No hit	0
AF_DN76229_c0_g1	0	0	2.43634	Basidiomycota	Endoglucanase-7	UniRef90_A0A0C3ATY2 Glycoside hydrolase family 61 protein n=1 Tax=Serendipita vermifera MAFF 305830 TaxID=933852 RepID=A0A0C3ATY2_9HOMO	No hit	0	0	1	AA9(2-92)	0
AF_DN92865_c0_g1	0	0.0165044	2.43515	Basidiomycota	Ran-binding protein, putative	UniRef90_V2YB69 Uncharacterized protein (Fragment) n=1 Tax=Moniliophthora roreri (strain MCA 2997) TaxID=1381753 RepID=V2YB69_MONRO	No hit	0	0.0132637	0.999912	No hit	0
AF_DN96632_c0_g1	0	0	2.43438	Ascomycota	NA	UniRef90_A0A1Y1ZX06 Uncharacterized protein n=1 Tax=Clohesyomyces aquaticus TaxID=1231657 RepID=A0A1Y1ZX06_9PLEO	No hit	0	0	1	No hit	0
AF_DN18090_c0_g1	0.0414157	0	2.43437	Ascomycota	3,4-dihydroxy-2-butanone 4-phosphate synthase	UniRef90_W7EFS4 3,4-dihydroxy-2-butanone 4-phosphate synthase n=1 Tax=Bipolaris victoriae FI3 TaxID=930091 RepID=W7EFS4_COCVI	No hit	0.0328724	0	0.99946	No hit	0
AF_DN64121_c0_g1	0	0	2.43404	Ascomycota	Metal homeostatis protein bsd2	UniRef90_W2SBR8 Uncharacterized protein n=1 Tax=Cyphellophora europaea CBS 101466 TaxID=1220924 RepID=W2SBR8_9EURO	No hit	0	0	1	No hit	0
AF_DN103711_c0_g1	0	0	2.43401	Basidiomycota	NA	UniRef90_A0A0D0CRP6 Unplaced genomic scaffold GYMLUscaffold_38, whole genome shotgun sequence n=1 Tax=Gymnopus luxurians FD-317 M1 TaxID=944289 RepID=A0A0D0CRP6_9AGAR	No hit	0	0	1	No hit	0
AF_DN65365_c0_g1	0	0	2.43099	No hit found	NA	No hits	No hit	0	0	1	No hit	0
AF_DN61138_c0_g1	0	0.0357953	2.42986	Basidiomycota	Probable mismatch base pair and cruciform DNA recognition protein Hmp1	UniRef90_A0A0C3PNF7 Uncharacterized protein n=1 Tax=Tulasnella calospora MUT 4182 TaxID=1051891 RepID=A0A0C3PNF7_9HOMO	No hit	0	0.0285231	0.999593	No hit	0
AF_DN16981_c0_g1	0	0	2.42802	Ascomycota	Ribose-phosphate pyrophosphokinase	UniRef90_B8LUR9 Uncharacterized protein n=1 Tax=Talaromyces stipitatus (strain ATCC 10500 / CBS 375.48 / QM 6759 / NRRL 1006)TaxID=441959 RepID=B8LUR9_TALSN	No hit	0	0	1	No hit	0
AF_DN101802_c0_g1	0	0	2.42776	Ascomycota	Transcription factor TFIIB	UniRef90_B6Q1D2 Transcription initiation protein n=3 Tax=Eurotiales TaxID=5042 RepID=B6Q1D2_TALMQ	No hit	0	0	1	No hit	0
AF_DN68082_c0_g1	0	0	2.4271	No hit found	NA	No hits	No hit	0	0	1	No hit	0
AF_DN13198_c0_g1	0	0	2.42424	Ascomycota	DNA-directed RNA polymerase II subunit RPB2	UniRef90_A0A1F7ZKY3 DNA-directed RNA polymerase subunit beta n=2 Tax=Aspergillus TaxID=5052 RepID=A0A1F7ZKY3_9EURO	No hit	0	0	1	No hit	0
AF_DN93535_c0_g1	0	0	2.42397	Ascomycota	von Willebrand factor type A	UniRef90_A0A178B7B2 Uncharacterized protein n=1 Tax=Stagonospora sp. SRC1lsM3a TaxID=765868 RepID=A0A178B7B2_9PLEO	No hit	0	0	1	No hit	0
AF_DN20243_c0_g1	0	0	2.42297	Ascomycota	NA	UniRef90_A0A0D2FTS3 Uncharacterized protein n=1 Tax=Phialophora americana TaxID=5601 RepID=A0A0D2FTS3_9EURO	No hit	0	0	1	No hit	0
AF_DN4883_c0_g1	0	0	2.41939	Basidiomycota	Eukaryotic translation elongation factor 2 (Fragment)	UniRef90_A0A165JAK3 p-loop containing nucleoside triphosphate hydrolase protein n=1 Tax=Exidia glandulosa HHB12029 TaxID=1314781 RepID=A0A165JAK3_EXIGL	No hit	0	0	1	No hit	0
AF_DN85592_c0_g1	0	0	2.41874	Ascomycota	NA	No hits	No hit	0	0	1	No hit	0
AF_DN58549_c1_g1	0	0	2.41846	Ascomycota	NA	UniRef90_A0A1Y1ZBS0 Fungal-specific transcription factor domain-domain-containing protein n=1 Tax=Clohesyomyces aquaticus TaxID=1231657 RepID=A0A1Y1ZBS0_9PLEO	No hit	0	0	1	No hit	0
AF_DN6382_c0_g1	0	0	2.41701	Basidiomycota	NA	UniRef90_C4Y177 ADP-ribosylation factor 1 n=1 Tax=Clavispora lusitaniae (strain ATCC 42720) TaxID=306902 RepID=C4Y177_CLAL4	No hit	0	0	1	No hit	0
AF_DN73536_c0_g1	0	0	2.41505	Ascomycota	NA	UniRef90_W2SDM5 Uncharacterized protein n=1 Tax=Cyphellophora europaea CBS 101466 TaxID=1220924 RepID=W2SDM5_9EURO	No hit	0	0	1	No hit	0
AF_DN2056_c0_g1	0	0	2.41496	Basidiomycota	NA	UniRef90_A0A0D2P1H9 Uncharacterized protein n=1 Tax=Hypholoma sublateritium FD-334 SS-4 TaxID=945553 RepID=A0A0D2P1H9_9AGAR	No hit	0	0	1	No hit	0
AF_DN66146_c0_g1	0	0	2.41415	Ascomycota	Transcriptional regulator Medusa	UniRef90_W2S9E8 Uncharacterized protein n=1 Tax=Cyphellophora europaea CBS 101466 TaxID=1220924 RepID=W2S9E8_9EURO	No hit	0	0	1	No hit	0
AF_DN74440_c0_g1	0	0	2.41407	Ascomycota	NA	UniRef90_A0A0G2GLY5 Uncharacterized protein n=1 Tax=Phaeomoniella chlamydospora TaxID=158046 RepID=A0A0G2GLY5_9EURO	No hit	0	0	1	No hit	0
AF_DN37171_c0_g1	0	0	2.41151	Basidiomycota	NA	No hits	No hit	0	0	1	No hit	0
AF_DN60353_c0_g1	0	0	2.41023	Ascomycota	NA	No hits	No hit	0	0	1	No hit	0
AF_DN86157_c0_g1	0	0	2.40983	Basidiomycota	NA	UniRef90_A0A0H2RTI0 Uncharacterized protein n=1 Tax=Schizopora paradoxa TaxID=27342 RepID=A0A0H2RTI0_9HOMO	No hit	0	0	1	No hit	0
AF_DN56522_c0_g1	0	0	2.409	Basidiomycota	NA	UniRef90_A0A067TJE7 Uncharacterized protein n=1 Tax=Galerina marginata (strain CBS 339.88) TaxID=685588 RepID=A0A067TJE7_GALM3	No hit	0	0	1	No hit	0
AF_DN101136_c0_g1	0	0	2.40808	Basidiomycota	Translationally-controlled tumor	UniRef90_A0A0H2S1M4 Uncharacterized protein n=1 Tax=Schizopora paradoxa TaxID=27342 RepID=A0A0H2S1M4_9HOMO	No hit	0	0	1	No hit	0
AF_DN58630_c0_g1	0	0	2.40629	Basidiomycota	NA	UniRef90_A0A0H2R3F1 Uncharacterized protein n=1 Tax=Schizopora paradoxa TaxID=27342 RepID=A0A0H2R3F1_9HOMO	No hit	0	0	1	No hit	0
AF_DN4046_c0_g1	0	0	2.40547	Ascomycota	Negative regulator of sexual conjugation and meiosis	UniRef90_W2SFR8 Uncharacterized protein n=1 Tax=Cyphellophora europaea CBS 101466 TaxID=1220924 RepID=W2SFR8_9EURO	No hit	0	0	1	No hit	0
AF_DN107507_c0_g1	0	0	2.4047	Basidiomycota	NA	No hits	No hit	0	0	1	No hit	0
AF_DN96088_c0_g1	0	0.0206808	2.40283	Basidiomycota	NA	UniRef90_I4W6U8 Putative NAD-specific glutamate dehydrogenase n=1 Tax=Rhodanobacter spathiphylli B39 TaxID=1163407 RepID=I4W6U8_9GAMM	No hit	0	0.0167131	0.99986	No hit	0
AF_DN78503_c0_g1	0	0	2.40115	Ascomycota	NA	UniRef90_A0A225AJT9 Uncharacterized protein n=1 Tax=Talaromyces atroroseus TaxID=1441469 RepID=A0A225AJT9_9EURO	No hit	0	0	1	No hit	0
AF_DN64788_c0_g1	0	0	2.40072	Basidiomycota	Transaldolase	UniRef90_A0A0D2NUP8 Transaldolase n=1 Tax=Hypholoma sublateritium FD-334 SS-4 TaxID=945553 RepID=A0A0D2NUP8_9AGAR	No hit	0	0	1	No hit	0
AF_DN74885_c0_g1	0	0	2.4003	Ascomycota	NA	UniRef90_A0A0G2EME6 Putative integral membrane protein n=1 Tax=Phaeomoniella chlamydospora TaxID=158046 RepID=A0A0G2EME6_9EURO	No hit	0	0	1	No hit	0
AF_DN88729_c0_g1	0	0	2.39956	Basidiomycota	Regulatory protein cys-3	UniRef90_A0A0H2S452 Uncharacterized protein n=1 Tax=Schizopora paradoxa TaxID=27342 RepID=A0A0H2S452_9HOMO	No hit	0	0	1	No hit	0
AF_DN89357_c0_g1	0	0	2.39906	Ascomycota	NA	UniRef90_Q0UBV1 Uncharacterized protein n=1 Tax=Phaeosphaeria nodorum (strain SN15 / ATCC MYA-4574 / FGSC 10173) TaxID=321614 RepID=Q0UBV1_PHANO	No hit	0	0	1	No hit	0
AF_DN56576_c0_g1	0	0	2.39688	Ascomycota	NA	UniRef90_A0A1Q5Q979 Uncharacterized protein n=1 Tax=Talaromyces atroroseus TaxID=1441469 RepID=A0A1Q5Q979_9EURO	No hit	0	0	1	No hit	0
AF_DN105549_c0_g1	0	0	2.39658	Ascomycota	NA	UniRef90_A0A0D1XZT8 Uncharacterized protein n=1 Tax=Verruconis gallopava TaxID=253628 RepID=A0A0D1XZT8_9PEZI	No hit	0	0	1	No hit	0
AF_DN65947_c0_g1	0	0	2.39563	No hit found	NA	UniRef90_A8NCU8 Uncharacterized protein n=1 Tax=Coprinopsis cinerea (strain Okayama-7 / 130 / ATCC MYA-4618 / FGSC 9003)TaxID=240176 RepID=A8NCU8_COPC7	No hit	0	0	1	No hit	0
AF_DN31803_c0_g1	0	0	2.39369	Ascomycota	NA	No hits	No hit	0	0	1	No hit	0
AF_DN106658_c0_g1	0	0	2.39364	No hit found	NA	No hits	No hit	0	0	1	No hit	0
AF_DN15152_c0_g1	0	0	2.39227	Basidiomycota	NA	No hits	No hit	0	0	1	No hit	0
AF_DN58201_c0_g1	0	0	2.39154	Basidiomycota	NA	UniRef90_A0A165G4B0 Uncharacterized protein n=1 Tax=Exidia glandulosa HHB12029 TaxID=1314781 RepID=A0A165G4B0_EXIGL	No hit	0	0	1	CBM57(6)	0
AF_DN67098_c0_g1	0	0	2.39061	Ascomycota	Structural constituent of ribosome	UniRef90_M7U9Y7 60S ribosomal protein L27 n=8 Tax=Helotiales TaxID=5178 RepID=M7U9Y7_BOTF1	No hit	0	0	1	No hit	0
AF_DN95281_c0_g1	0	0	2.38777	Ascomycota	Btb poz domain-containing protein	UniRef90_A0A1Y2A6K1 Uncharacterized protein n=1 Tax=Clohesyomyces aquaticus TaxID=1231657 RepID=A0A1Y2A6K1_9PLEO	No hit	0	0	1	No hit	0
AF_DN55548_c0_g1	0	0	2.38709	Ascomycota	NA	UniRef90_A0A232LQE0 Uncharacterized protein n=1 Tax=Elaphomyces granulatus TaxID=519963 RepID=A0A232LQE0_9EURO	No hit	0	0	1	No hit	0
AF_DN32805_c0_g1	0	0	2.38541	Ascomycota	NA	UniRef90_G2Q649 Uncharacterized protein n=1 Tax=Myceliophthora thermophila (strain ATCC 42464 / BCRC 31852 / DSM 1799) TaxID=573729 RepID=G2Q649_MYCTT	No hit	0	0	1	No hit	0
AF_DN85649_c0_g1	0	0	2.38516	Ascomycota	NA	UniRef90_A0A177BU70 Zinc finger transcription factor ace1 n=1 Tax=Paraphaeosphaeria sporulosa TaxID=1460663 RepID=A0A177BU70_9PLEO	No hit	0	0	1	No hit	0
AF_DN86873_c0_g1	0	0	2.38424	Ascomycota	NA	UniRef90_V5I598 Stress response protein (Ish1), putative n=1 Tax=Byssochlamys spectabilis (strain No. 5 / NBRC 109023) TaxID=1356009 RepID=V5I598_BYSSN	No hit	0	0	1	No hit	0
AF_DN18779_c0_g1	0	0	2.38091	Basidiomycota	NA	UniRef90_J0LJV0 Uncharacterized protein n=1 Tax=Auricularia subglabra (strain TFB-10046 / SS5) TaxID=717982 RepID=J0LJV0_AURST	No hit	0	0	1	No hit	0
AF_DN64982_c0_g1	0	0	2.38047	Ascomycota	Nucleotide-binding, alpha-beta plait	UniRef90_B8MFL2 Transformer-SR ribonucleoprotein, putative n=4 Tax=Eurotiales TaxID=5042 RepID=B8MFL2_TALSN	No hit	0	0	1	No hit	0
AF_DN66575_c0_g1	0	0	2.38038	Ascomycota	NA	UniRef90_A0A1Y2A4X4 SNF2 family N-terminal domain-domain-containing protein n=1 Tax=Clohesyomyces aquaticus TaxID=1231657 RepID=A0A1Y2A4X4_9PLEO	No hit	0	0	1	No hit	0
AF_DN69410_c0_g1	0	0	2.37978	Ascomycota	Alpha/beta-hydrolase	UniRef90_A0A1C1D0V3 Putative glucan endo-1,3-beta-glucosidase eglC n=4 Tax=Herpotrichiellaceae TaxID=43219 RepID=A0A1C1D0V3_9EURO	No hit	0	0	1	GH17(19)	0
AF_DN82620_c0_g1	0	0	2.37943	No hit found	NA	UniRef90_A0A165HPN9 Uncharacterized protein n=1 Tax=Exidia glandulosa HHB12029 TaxID=1314781 RepID=A0A165HPN9_EXIGL	No hit	0	0	1	No hit	0
AF_DN82710_c0_g1	0	0	2.37785	No hit found	NA	No hits	No hit	0	0	1	No hit	0
AF_DN77894_c0_g1	0	0	2.37758	No hit found	NA	No hits	No hit	0	0	1	No hit	0
AF_DN87089_c0_g1	0	0	2.37645	Ascomycota	NA	UniRef90_A0A2L2THH9 Uncharacterized protein n=1 Tax=Fusarium venenatum TaxID=56646 RepID=A0A2L2THH9_9HYPO	No hit	0	0	1	No hit	0
AF_DN98407_c0_g1	0	0	2.37551	Basidiomycota	Transcription factor	UniRef90_A0A067TTD8 Uncharacterized protein n=1 Tax=Galerina marginata (strain CBS 339.88) TaxID=685588 RepID=A0A067TTD8_GALM3	No hit	0	0	1	No hit	0
AF_DN75748_c0_g1	0	0	2.37514	Ascomycota	NA	UniRef90_A0A0G2GSN3 Putative transcriptional activator hac1 n=1 Tax=Phaeomoniella chlamydospora TaxID=158046 RepID=A0A0G2GSN3_9EURO	No hit	0	0	1	No hit	0
AF_DN80460_c0_g1	0	0	2.37473	Ascomycota	Glyceraldehyde-3-phosphate dehydrogenase (Fragment)	UniRef90_A0A0N0NI47 Glyceraldehyde-3-phosphate dehydrogenase n=1 Tax=Phialophora attae TaxID=1664694 RepID=A0A0N0NI47_9EURO	No hit	0	0	1	No hit	0
AF_DN88045_c0_g1	0	0	2.37402	Ascomycota	NA	UniRef90_A0A225B2F9 Calcium-transporting ATPase n=1 Tax=Talaromyces atroroseus TaxID=1441469 RepID=A0A225B2F9_9EURO	No hit	0	0	1	No hit	0	gnl|TC-DB|Q9UUY2|3.A.3.2.27 Putative calcium P-type ATPase (Fragment) OS=Neurospora crassa GN=nca-2 PE=3 SV=1	84.8214
AF_DN76833_c0_g1	0	0	2.3731	Ascomycota	NA	UniRef90_A0A177BZ41 Uncharacterized protein n=1 Tax=Paraphaeosphaeria sporulosa TaxID=1460663 RepID=A0A177BZ41_9PLEO	No hit	0	0	1	No hit	0
AF_DN54711_c0_g1	0	0	2.37241	Ascomycota	mRNA stability protein	UniRef90_A0A1Q5Q827 mRNA stability protein n=1 Tax=Talaromyces atroroseus TaxID=1441469 RepID=A0A1Q5Q827_9EURO	No hit	0	0	1	No hit	0
AF_DN76190_c0_g1	0	0	2.3724	Ascomycota	Cellular nucleic acid-binding protein homolog	UniRef90_R1GV44 Putative zinc knuckle domain protein n=5 Tax=Botryosphaeriaceae TaxID=45131 RepID=R1GV44_BOTPV	No hit	0	0	1	No hit	0
AF_DN74535_c0_g1	0	0	2.37051	Ascomycota	TATA box binding transcription initiation factor TFIID-1	UniRef90_A0A177CWC6 Transcription initiation factor-like protein n=1 Tax=Paraphaeosphaeria sporulosa TaxID=1460663 RepID=A0A177CWC6_9PLEO	No hit	0	0	1	No hit	0
AF_DN7908_c0_g2	0	0	2.3702	Asco or Basidio	NA	UniRef90_A0A0D2FC39 Uncharacterized protein n=1 Tax=Phialophora americana TaxID=5601 RepID=A0A0D2FC39_9EURO	No hit	0	0	1	No hit	0
AF_DN94473_c0_g1	0	0	2.37018	Basidiomycota	Glycoside hydrolase/deacetylase	UniRef90_A0A0C3CLI0 Carbohydrate esterase family 4 protein n=1 Tax=Hebeloma cylindrosporum h7 TaxID=686832 RepID=A0A0C3CLI0_HEBCY	No hit	0	0	1	No hit	0
AF_DN104729_c0_g1	0	0.0453207	2.37007	Ascomycota	1,3-beta-glucanosyltransferase (Fragment)	UniRef90_A0A1Y1ZTU8 1,3-beta-glucanosyltransferase n=1 Tax=Clohesyomyces aquaticus TaxID=1231657 RepID=A0A1Y1ZTU8_9PLEO	No hit	0	0.0364581	0.999335	No hit	0
AF_DN105630_c0_g1	0	0	2.36816	Ascomycota	Glucosamine-6-phosphate isomerase	UniRef90_A0A1Y1ZX73 Glucosamine-6-phosphate isomerase n=1 Tax=Clohesyomyces aquaticus TaxID=1231657 RepID=A0A1Y1ZX73_9PLEO	No hit	0	0	1	No hit	0
AF_DN77991_c0_g1	0	0	2.36727	Ascomycota	NA	UniRef90_A0A177C4I2 Kinase-like protein n=1 Tax=Paraphaeosphaeria sporulosa TaxID=1460663 RepID=A0A177C4I2_9PLEO	No hit	0	0	1	No hit	0
AF_DN14923_c0_g1	0	0	2.36676	Ascomycota	NA	UniRef90_B2W0U7 Glutamate dehydrogenase n=14 Tax=Pleosporales TaxID=92860 RepID=B2W0U7_PYRTR	No hit	0	0	1	No hit	0
AF_DN103881_c0_g1	0	0	2.36639	Basidiomycota	NA	No hits	No hit	0	0	1	No hit	0
AF_DN35583_c0_g1	0	0	2.36578	Ascomycota	NA	No hits	No hit	0	0	1	No hit	0
AF_DN1661_c0_g1	0	0.0301543	2.3643	Basidiomycota	Protein rds1 [Schizosaccharomyces pombe 972h-]	UniRef90_A0A0D2NB78 Uncharacterized protein n=1 Tax=Hypholoma sublateritium FD-334 SS-4 TaxID=945553 RepID=A0A0D2NB78_9AGAR	No hit	0	0.0244801	0.9997	No hit	0
AF_DN101700_c0_g1	0	0	2.36429	Ascomycota	NA	No hits	No hit	0	0	1	No hit	0
AF_DN6622_c0_g1	0	0	2.36034	Ascomycota	CAZy families GH76 protein (Fragment)	UniRef90_A0A0G2H0V1 Mannan endo-1,6-alpha-mannosidase n=3 Tax=Diplodia TaxID=66735 RepID=A0A0G2H0V1_9PEZI	No hit	0	0	1	No hit	0
AF_DN35709_c0_g1	0	0	2.36004	Basidiomycota	NA	UniRef90_A0A0C3KQR7 Uncharacterized protein n=1 Tax=Tulasnella calospora MUT 4182 TaxID=1051891 RepID=A0A0C3KQR7_9HOMO	No hit	0	0	1	No hit	0
AF_DN57004_c0_g1	0	0	2.35972	Basidiomycota	GPI anchored endo1,3(4)-beta-glucanase	UniRef90_G4TVF7 Related to endo-1,3(4)-beta-glucanase n=1 Tax=Serendipita indica (strain DSM 11827) TaxID=1109443 RepID=G4TVF7_SERID	No hit	0	0	1	GH16(61-193)	0
AF_DN55552_c0_g1	0	0	2.35936	Ascomycota	NA	UniRef90_A0A0U1M6X7 Eukaryotic translation initiation factor 4 gamma n=1 Tax=Talaromyces islandicus TaxID=28573 RepID=A0A0U1M6X7_TALIS	No hit	0	0	1	No hit	0
AF_DN80507_c0_g1	0	0	2.35883	Ascomycota	NA	UniRef90_A0A074YI44 GPI-anchored cell wall organization protein Ecm33 n=2 Tax=Aureobasidium pullulans TaxID=5580 RepID=A0A074YI44_AURPU	No hit	0	0	1	No hit	0
AF_DN108918_c0_g1	0	0	2.35877	Ascomycota	NA	UniRef90_A0A093V7P8 Serine/threonine-protein kinase srk1 n=3 Tax=Eurotiales TaxID=5042 RepID=A0A093V7P8_TALMA	No hit	0	0	1	No hit	0
AF_DN70552_c0_g1	0	0	2.35683	Ascomycota	NA	No hits	No hit	0	0	1	No hit	0
AF_DN97189_c0_g1	0	0	2.35565	Basidiomycota	NA	No hits	No hit	0	0	1	No hit	0
AF_DN84121_c0_g1	0	0	2.35564	Ascomycota	NA	UniRef90_B8MBF5 Vacuolar dynamin-like GTPase VpsA, putative n=4 Tax=Eurotiales TaxID=5042 RepID=B8MBF5_TALSN	No hit	0	0	1	No hit	0	gnl|TC-DB|P21576|9.A.63.1.1 Vacuolar protein sorting-associated protein 1 OS=Saccharomyces cerevisiae (strain ATCC 204508/ S288c) GN=VPS1 PE=1 SV=2	85.443
AF_DN74732_c0_g1	0	0	2.35458	Basidiomycota	NA	UniRef90_A0A067SYA9 Uncharacterized protein n=1 Tax=Galerina marginata (strain CBS 339.88) TaxID=685588 RepID=A0A067SYA9_GALM3	No hit	0	0	1	No hit	0
AF_DN19434_c0_g1	0	0	2.35348	Ascomycota	NA	UniRef90_A0A175VNH1 Uncharacterized protein n=1 Tax=Madurella mycetomatis TaxID=100816 RepID=A0A175VNH1_9PEZI	No hit	0	0	1	No hit	0
AF_DN103464_c0_g1	0	0	2.34834	Basidiomycota	NA	UniRef90_A0A067TED5 Uncharacterized protein n=1 Tax=Galerina marginata (strain CBS 339.88) TaxID=685588 RepID=A0A067TED5_GALM3	No hit	0	0	1	No hit	0
AF_DN61226_c0_g1	0	0	2.34697	Ascomycota	Putative nadp-specific glutamate dehydrogenase protein	UniRef90_A0A177CK64 Glutamate dehydrogenase n=2 Tax=Dikarya TaxID=451864 RepID=A0A177CK64_9PLEO	No hit	0	0	1	No hit	0
AF_DN101553_c0_g1	0	0.00518277	2.34501	Ascomycota	Toxin biosynthesis cytochrome p450	UniRef90_L2GBU0 Toxin biosynthesis cytochrome p450 n=1 Tax=Colletotrichum gloeosporioides (strain Nara gc5) TaxID=1213859 RepID=L2GBU0_COLGN	No hit	0	0.00428113	0.999991	No hit	0
AF_DN85067_c0_g1	0	0	2.34431	Basidiomycota	Eukaryotic translation initiation factor	UniRef90_A0A0H2S1L7 Eukaryotic translation initiation factor 5A n=1 Tax=Schizopora paradoxa TaxID=27342 RepID=A0A0H2S1L7_9HOMO	No hit	0	0	1	No hit	0
AF_DN86259_c0_g1	0	0	2.34356	Basidiomycota	NA	UniRef90_A0A0H2RNQ5 ATP-dependent RNA helicase ded-1 n=1 Tax=Schizopora paradoxa TaxID=27342 RepID=A0A0H2RNQ5_9HOMO	No hit	0	0	1	No hit	0	gnl|TC-DB|O00571|1.I.1.1.3 ATP-dependent RNA helicase DDX3X OS=Homo sapiens GN=DDX3X PE=1 SV=3	72.6415
AF_DN103280_c0_g1	0	0.0103224	2.34212	Ascomycota	Heat shock protein 16	UniRef90_A0A1E1KXG6 Uncharacterized protein n=3 Tax=Rhynchosporium TaxID=38037 RepID=A0A1E1KXG6_9HELO	ACD	0	0.00851075	0.999964	No hit	0
AF_DN87737_c0_g1	0	0	2.33913	Ascomycota	NA	UniRef90_A0A1Y1YNJ4 Uncharacterized protein n=1 Tax=Clohesyomyces aquaticus TaxID=1231657 RepID=A0A1Y1YNJ4_9PLEO	No hit	0	0	1	No hit	0
AF_DN10378_c0_g1	0	0.0141564	2.33803	Ascomycota	NA	UniRef90_W2RUY2 Uncharacterized protein n=1 Tax=Cyphellophora europaea CBS 101466 TaxID=1220924 RepID=W2RUY2_9EURO	No hit	0	0.0116612	0.999932	No hit	0
AF_DN105539_c0_g1	0	0	2.33397	Basidiomycota	NA	UniRef90_A0A0C2XRH5 Uncharacterized protein n=1 Tax=Hebeloma cylindrosporum h7 TaxID=686832 RepID=A0A0C2XRH5_HEBCY	No hit	0	0	1	No hit	0
AF_DN57336_c0_g1	0	0	2.33386	Ascomycota	NA	UniRef90_W2RZM0 Uncharacterized protein n=1 Tax=Cyphellophora europaea CBS 101466 TaxID=1220924 RepID=W2RZM0_9EURO	No hit	0	0	1	No hit	0
AF_DN86179_c0_g1	0	0	2.33092	Ascomycota	NA	UniRef90_A0A0L1I1Z8 Cell division control protein 48 n=20 Tax=Dothideomycetes TaxID=147541 RepID=A0A0L1I1Z8_9PLEO	Hsp100	0	0	1	No hit	0	gnl|TC-DB|P25694|3.A.16.1.2 Cell division control protein 48 - Saccharomyces cerevisiae (Baker's yeast).	96.1538
AF_DN79288_c0_g1	0	0.0379973	2.32933	Ascomycota	NA	UniRef90_A0A0D2FA44 Uncharacterized protein n=1 Tax=Phialophora americana TaxID=5601 RepID=A0A0D2FA44_9EURO	No hit	0	0.0309912	0.99952	No hit	0
AF_DN108082_c0_g1	0	0	2.32703	No hit found	NA	No hits	No hit	0	0	1	No hit	0
AF_DN108432_c0_g1	0	0	2.32491	Basidiomycota	NA	UniRef90_G4TWC0 Uncharacterized protein n=1 Tax=Serendipita indica (strain DSM 11827) TaxID=1109443 RepID=G4TWC0_SERID	No hit	0	0	1	No hit	0
AF_DN75699_c0_g1	0	0	2.32326	Ascomycota	Transcription factor RfeF	UniRef90_A0A0G2EFT9 Putative transcription factor n=1 Tax=Phaeomoniella chlamydospora TaxID=158046 RepID=A0A0G2EFT9_9EURO	No hit	0	0	1	No hit	0
AF_DN55253_c0_g1	0	0	2.32304	Basidiomycota	Ran-binding protein, putative	UniRef90_B0CQS3 Predicted protein n=2 Tax=Laccaria TaxID=29882 RepID=B0CQS3_LACBS	No hit	0	0	1	No hit	0
AF_DN57969_c0_g1	0	0	2.32158	Ascomycota	NA	UniRef90_B8LVD5 DUF6 domain protein, putative n=1 Tax=Talaromyces stipitatus (strain ATCC 10500 / CBS 375.48 / QM 6759 /NRRL 1006) TaxID=441959 RepID=B8LVD5_TALSN	No hit	0	0	1	No hit	0
AF_DN80049_c0_g1	0	0.0228272	2.32088	Ascomycota	NA	UniRef90_A0A1Y1YFY6 Glycosyl hydrolases family 16-domain-containing protein n=1 Tax=Clohesyomyces aquaticus TaxID=1231657 RepID=A0A1Y1YFY6_9PLEO	No hit	0	0.0188019	0.999823	No hit	0
AF_DN56196_c0_g1	0	0	2.32043	Ascomycota	Eukaryotic translation initiation factor 6	UniRef90_A0A0N0NRQ7 Eukaryotic translation initiation factor 6 n=1 Tax=Phialophora attae TaxID=1664694 RepID=A0A0N0NRQ7_9EURO	No hit	0	0	1	No hit	0
AF_DN27537_c0_g1	0	0	2.3193	Ascomycota	Heat shock protein SSB	UniRef90_G2WTH8 Heat shock protein sks2 n=7 Tax=Verticillium TaxID=1036719 RepID=G2WTH8_VERDV	Hsp70	0	0	1	No hit	0
AF_DN99762_c0_g1	0	0	2.3176	Ascomycota	Clock controled protein	UniRef90_B6QEC6 Clock controled protein (Ccg-8), putative n=3 Tax=Eurotiales TaxID=5042 RepID=B6QEC6_TALMQ	No hit	0	0	1	No hit	0
AF_DN83648_c0_g1	0	0	2.31714	Basidiomycota	Heat shock 70kDa protein 4	UniRef90_A0A165GQM4 Heat shock protein 70 n=1 Tax=Exidia glandulosa HHB12029 TaxID=1314781 RepID=A0A165GQM4_EXIGL	Hsp70	0	0	1	No hit	0
AF_DN34584_c0_g1	0	0	2.31706	Basidiomycota	NA	UniRef90_A8PBS3 Uncharacterized protein n=1 Tax=Coprinopsis cinerea (strain Okayama-7 / 130 / ATCC MYA-4618 / FGSC 9003)TaxID=240176 RepID=A8PBS3_COPC7	No hit	0	0	1	No hit	0
AF_DN61524_c0_g1	0	0	2.31631	Basidiomycota	NA	UniRef90_A0A0C2YU16 Uncharacterized protein n=1 Tax=Hebeloma cylindrosporum h7 TaxID=686832 RepID=A0A0C2YU16_HEBCY	No hit	0	0	1	No hit	0
AF_DN105330_c0_g1	0	0	2.3163	Basidiomycota	Heat shock protein 16	UniRef90_A8N4X3 Small heat shock protein n=1 Tax=Coprinopsis cinerea (strain Okayama-7 / 130 / ATCC MYA-4618 / FGSC 9003)TaxID=240176 RepID=A8N4X3_COPC7	ACD	0	0	1	No hit	0
AF_DN23416_c0_g1	0	0	2.31555	Ascomycota	TATA-box binding protein	UniRef90_B8M7G9 RNA polymerase I and III transcription factor complex component Tbp, putative n=29 Tax=leotiomyceta TaxID=716546 RepID=B8M7G9_TALSN	No hit	0	0	1	No hit	0
AF_DN67589_c0_g1	0	0	2.31533	Ascomycota	NA	UniRef90_A0A254U614 Dioxygenase family protein n=1 Tax=Aspergillus niger TaxID=5061 RepID=A0A254U614_ASPNG	No hit	0	0	1	No hit	0
AF_DN12927_c0_g1	0	0	2.31476	Basidiomycota	NA	UniRef90_A0A0C2YA08 Plasma membrane ATPase n=3 Tax=Agaricales TaxID=5338 RepID=A0A0C2YA08_HEBCY	No hit	0	0	1	No hit	0
AF_DN112_c0_g1	0	0	2.31391	Ascomycota	Heat shock protein 30	UniRef90_G9NL97 Uncharacterized protein n=1 Tax=Hypocrea atroviridis (strain ATCC 20476 / IMI 206040) TaxID=452589 RepID=G9NL97_HYPAI	ACD	0	0	1	No hit	0
AF_DN75680_c0_g1	0	0	2.31379	No hit found	NA	UniRef90_A8P0G3 Uncharacterized protein n=1 Tax=Coprinopsis cinerea (strain Okayama-7 / 130 / ATCC MYA-4618 / FGSC 9003)TaxID=240176 RepID=A8P0G3_COPC7	No hit	0	0	1	No hit	0
AF_DN12665_c0_g1	0	0	2.31341	Ascomycota	Extracellular cell wall glucanase	UniRef90_A0A1Y2LZC9 Uncharacterized protein n=1 Tax=Epicoccum nigrum TaxID=105696 RepID=A0A1Y2LZC9_EPING	No hit	0	0	1	GH16(7-167)	0
AF_DN99084_c0_g1	0	0	2.31304	Ascomycota	NA	UniRef90_A0A163EL83 ATPase n=2 Tax=Didymellaceae TaxID=683158 RepID=A0A163EL83_DIDRA	No hit	0	0	1	No hit	0
AF_DN106528_c0_g1	0	0	2.31227	Basidiomycota	NA	UniRef90_A0A0H2SD98 Uncharacterized protein n=1 Tax=Schizopora paradoxa TaxID=27342 RepID=A0A0H2SD98_9HOMO	No hit	0	0	1	No hit	0
AF_DN2893_c0_g1	0	0	2.31151	Basidiomycota	NA	UniRef90_A0A165LVB9 NAD(P)-binding protein n=1 Tax=Exidia glandulosa HHB12029 TaxID=1314781 RepID=A0A165LVB9_EXIGL	No hit	0	0	1	No hit	0
AF_DN73419_c0_g1	0	0	2.31069	Basidiomycota	Carbohydrate esterase family 4 protein (Fragment)	UniRef90_A0A1Y2IT24 Glycoside hydrolase/deacetylase n=1 Tax=Trametes coccinea BRFM310 TaxID=1353009 RepID=A0A1Y2IT24_PYCCO	No hit	0	0	1	CE4(191-296)	0
AF_DN75960_c0_g1	0	0	2.3093	Ascomycota	NA	UniRef90_W2S2D8 Inosine-5'-monophosphate dehydrogenase n=1 Tax=Cyphellophora europaea CBS 101466 TaxID=1220924 RepID=W2S2D8_9EURO	No hit	0	0	1	No hit	0
AF_DN55466_c0_g1	0	0	2.30901	Ascomycota	NA	UniRef90_A0A177C4L1 Glycoside hydrolase n=1 Tax=Paraphaeosphaeria sporulosa TaxID=1460663 RepID=A0A177C4L1_9PLEO	No hit	0	0	1	GH17(28-121)	0
AF_DN102320_c0_g1	0	0	2.30841	Ascomycota	Extracellular cell wall glucanase	UniRef90_B8M267 Uncharacterized protein n=1 Tax=Talaromyces stipitatus (strain ATCC 10500 / CBS 375.48 / QM 6759 / NRRL 1006)TaxID=441959 RepID=B8M267_TALSN	No hit	0	0	1	GH16(3-137)	0
AF_DN65469_c0_g1	0	0	2.30796	Ascomycota	Actin depolymerizing factor	UniRef90_B8MJY8 Cofilin n=4 Tax=Eurotiales TaxID=5042 RepID=B8MJY8_TALSN	No hit	0	0	1	No hit	0
AF_DN63285_c0_g1	0	0	2.30591	Ascomycota	NA	UniRef90_R1GE13 Putative heat shock protein hsp88 protein n=2 Tax=Botryosphaeriaceae TaxID=45131 RepID=R1GE13_BOTPV	No hit	0	0	1	No hit	0
AF_DN71942_c0_g1	0	0	2.30524	Ascomycota	NA	UniRef90_A0A0G2GNZ4 Putative aaa family atpase n=1 Tax=Phaeomoniella chlamydospora TaxID=158046 RepID=A0A0G2GNZ4_9EURO	No hit	0	0	1	No hit	0
AF_DN1380_c0_g1	0	0	2.30328	Ascomycota	NA	UniRef90_A0A0J8RFI9 Heat shock 70 kDa protein C n=1 Tax=Coccidioides immitis H538.4 TaxID=396776 RepID=A0A0J8RFI9_COCIT	Hsp70	0	0	1	No hit	0	gnl|TC-DB|P10591|3.A.16.1.6 Heat shock protein SSA1 OS=Saccharomyces cerevisiae (strain ATCC 204508 / S288c) OX=559292 GN=SSA1 PE=1 SV=4	91.5966
AF_DN61525_c0_g1	0	0	2.30293	Basidiomycota	NA	UniRef90_A0A067T9L8 Uncharacterized protein n=1 Tax=Galerina marginata (strain CBS 339.88) TaxID=685588 RepID=A0A067T9L8_GALM3	No hit	0	0	1	No hit	0
AF_DN71717_c0_g1	0	0	2.3026	No hit found	NA	No hits	No hit	0	0	1	No hit	0
AF_DN70079_c0_g1	0	0	2.3022	Ascomycota	Eukaryotic translation initiation factor 6	UniRef90_A0A0G2DW92 Eukaryotic translation initiation factor 6 n=1 Tax=Phaeomoniella chlamydospora TaxID=158046 RepID=A0A0G2DW92_9EURO	No hit	0	0	1	No hit	0
AF_DN33173_c0_g1	0	0	2.29672	Ascomycota	NA	UniRef90_B6Q8Z7 Uncharacterized protein n=1 Tax=Talaromyces marneffei (strain ATCC 18224 / CBS 334.59 / QM 7333) TaxID=441960 RepID=B6Q8Z7_TALMQ	No hit	0	0	1	No hit	0
AF_DN77371_c0_g1	0	0	2.29651	No hit found	NA	UniRef90_M7S6H0 Uncharacterized protein n=1 Tax=Eutypa lata (strain UCR-EL1) TaxID=1287681 RepID=M7S6H0_EUTLA	No hit	0	0	1	No hit	0
AF_DN22218_c0_g1	0	0	2.29604	Basidiomycota	NA	UniRef90_A0A067T7S8 Inosine-5'-monophosphate dehydrogenase n=1 Tax=Galerina marginata (strain CBS 339.88) TaxID=685588 RepID=A0A067T7S8_GALM3	No hit	0	0	1	No hit	0
AF_DN97201_c0_g1	0	0	2.2957	Ascomycota	NA	UniRef90_V9DHJ2 Uncharacterized protein n=2 Tax=Cladophialophora carrionii TaxID=86049 RepID=V9DHJ2_9EURO	No hit	0	0	1	No hit	0
AF_DN92304_c0_g1	0	0	2.29482	Ascomycota	NA	UniRef90_A0A177CLQ5 Uncharacterized protein n=1 Tax=Paraphaeosphaeria sporulosa TaxID=1460663 RepID=A0A177CLQ5_9PLEO	No hit	0	0	1	No hit	0
AF_DN89772_c0_g1	0	0	2.29442	Ascomycota	NA	UniRef90_A0A178EPA4 Uncharacterized protein n=1 Tax=Pyrenochaeta sp. DS3sAY3a TaxID=765867 RepID=A0A178EPA4_9PLEO	No hit	0	0	1	No hit	0
AF_DN93458_c0_g1	0	0.041423	2.29374	Ascomycota	NA	UniRef90_A0A1Q5Q9C5 Cell pattern formation-associated protein stuA n=1 Tax=Talaromyces atroroseus TaxID=1441469 RepID=A0A1Q5Q9C5_9EURO	No hit	0	0.03403	0.999421	No hit	0
AF_DN65465_c0_g1	0	0	2.29325	Ascomycota	PI-PLC X domain-containing protein 1	UniRef90_A0A166BUV1 PLC-like phosphodiesterase n=1 Tax=Exidia glandulosa HHB12029 TaxID=1314781 RepID=A0A166BUV1_EXIGL	No hit	0	0	1	No hit	SP(Sec/SPI)
AF_DN104823_c0_g1	0	0	2.29201	Basidiomycota	Citrate synthase	UniRef90_A0A0H2RLQ4 Citrate synthase n=1 Tax=Schizopora paradoxa TaxID=27342 RepID=A0A0H2RLQ4_9HOMO	No hit	0	0	1	No hit	0
AF_DN95774_c0_g1	0	0	2.28956	Ascomycota	Pyranose 2-oxidase	UniRef90_A0A177C4X2 Uncharacterized protein n=1 Tax=Paraphaeosphaeria sporulosa TaxID=1460663 RepID=A0A177C4X2_9PLEO	No hit	0	0	1	No hit	0
AF_DN28709_c0_g1	0	0	2.28932	Ascomycota	mRNA binding post-transcriptional regulator	UniRef90_B6QUZ2 mRNA binding post-transcriptional regulator (Csx1), putative n=2 Tax=Talaromyces marneffei TaxID=37727 RepID=B6QUZ2_TALMQ	No hit	0	0	1	No hit	0
AF_DN103737_c0_g1	0	0	2.28921	Ascomycota	NA	No hits	No hit	0	0	1	No hit	0
AF_DN104741_c0_g1	0	0	2.28834	Ascomycota	Transaldolase	UniRef90_A0A1Y1Z1N0 Transaldolase n=1 Tax=Clohesyomyces aquaticus TaxID=1231657 RepID=A0A1Y1Z1N0_9PLEO	No hit	0	0	1	No hit	0
AF_DN82591_c0_g1	0	0	2.28831	Ascomycota	NA	UniRef90_A0A225BC49 Uncharacterized protein n=1 Tax=Talaromyces atroroseus TaxID=1441469 RepID=A0A225BC49_9EURO	No hit	0	0	1	No hit	0
AF_DN58445_c0_g1	0	0	2.28649	Ascomycota	NA	UniRef90_A0A225B6D7 6-phosphogluconate dehydrogenase, decarboxylating n=1 Tax=Talaromyces atroroseus TaxID=1441469 RepID=A0A225B6D7_9EURO	No hit	0	0	1	No hit	0
AF_DN87263_c0_g1	0	0	2.28474	Ascomycota	NA	UniRef90_A0A0L1HKA7 Pre-mrna processing factor 4-like protein n=1 Tax=Stemphylium lycopersici TaxID=183478 RepID=A0A0L1HKA7_9PLEO	No hit	0	0	1	No hit	0
AF_DN5369_c0_g1	0	0	2.28399	No hit found	NA	No hits	No hit	0	0	1	No hit	0
AF_DN41827_c0_g2	0	0	2.28387	Ascomycota	Cell surface protein, putative	UniRef90_M2SXJ2 Uncharacterized protein n=1 Tax=Cochliobolus heterostrophus (strain C5 / ATCC 48332 / race O) TaxID=701091 RepID=M2SXJ2_COCH5	No hit	0	0	1	No hit	0
AF_DN65415_c0_g1	0	0	2.2827	Ascomycota	NA	UniRef90_A0A225B1U0 Uncharacterized protein n=1 Tax=Talaromyces atroroseus TaxID=1441469 RepID=A0A225B1U0_9EURO	No hit	0	0	1	No hit	0
AF_DN101622_c0_g1	0	0	2.28099	Ascomycota	NA	UniRef90_A0A1Y1ZKH5 Eukaryotic translation initiation factor-like protein 5 n=1 Tax=Clohesyomyces aquaticus TaxID=1231657 RepID=A0A1Y1ZKH5_9PLEO	No hit	0	0	1	No hit	0
AF_DN76989_c0_g1	0	0	2.28067	Basidiomycota	NA	UniRef90_A0A067SM68 Uncharacterized protein n=1 Tax=Galerina marginata (strain CBS 339.88) TaxID=685588 RepID=A0A067SM68_GALM3	No hit	0	0	1	No hit	0
AF_DN81021_c0_g1	0	0	2.28048	Basidiomycota	Ribosomal protein S9	UniRef90_A0A151WDC2 40S ribosomal protein S16 n=10 Tax=Agaricales TaxID=5338 RepID=A0A151WDC2_HYPMA	No hit	0	0	1	No hit	0
AF_DN69480_c0_g1	0	0	2.27935	Basidiomycota	Mitochondrial outer membrane protein porin	UniRef90_A0A0D2MJZ4 Uncharacterized protein n=1 Tax=Hypholoma sublateritium FD-334 SS-4 TaxID=945553 RepID=A0A0D2MJZ4_9AGAR	No hit	0	0	1	No hit	0
AF_DN77581_c0_g1	0	0	2.27914	Ascomycota	NA	UniRef90_A0A093XR90 Meiotic expression up-regulated protein 6 n=1 Tax=Talaromyces marneffei PM1 TaxID=1077442 RepID=A0A093XR90_TALMA	No hit	0	0	1	No hit	0
AF_DN54832_c0_g1	0	0	2.27878	Ascomycota	ZZ type zinc finger domain-containing protein	UniRef90_A0A1Q5QAN3 Uncharacterized protein n=1 Tax=Talaromyces atroroseus TaxID=1441469 RepID=A0A1Q5QAN3_9EURO	No hit	0	0	1	No hit	0
AF_DN26692_c0_g1	0	0.242333	2.27857	Ascomycota	NA	UniRef90_A0A1Y1ZG78 p-loop containing nucleoside triphosphate hydrolase protein n=1 Tax=Clohesyomyces aquaticus TaxID=1231657 RepID=A0A1Y1ZG78_9PLEO	No hit	0	0.179766	0.983709	No hit	0
AF_DN103458_c0_g1	0	0	2.27855	Ascomycota	NA	UniRef90_W2S197 Uncharacterized protein n=1 Tax=Cyphellophora europaea CBS 101466 TaxID=1220924 RepID=W2S197_9EURO	No hit	0	0	1	No hit	0
AF_DN59449_c0_g1	0	0	2.27854	Ascomycota	NA	UniRef90_W2RUU5 T-complex protein 1 subunit epsilon n=2 Tax=Chaetothyriales TaxID=34395 RepID=W2RUU5_9EURO	Hsp60	0	0	1	No hit	0
AF_DN55351_c0_g1	0	0	2.27818	Basidiomycota	Mitochondrial acidic protein mam33	UniRef90_A0A0C2XGN6 Uncharacterized protein n=1 Tax=Hebeloma cylindrosporum h7 TaxID=686832 RepID=A0A0C2XGN6_HEBCY	No hit	0	0	1	No hit	0
AF_DN103269_c0_g1	0	0.00794273	2.27617	Basidiomycota	Glycoside hydrolase	UniRef90_A0A165Q0A2 Glycoside hydrolase n=1 Tax=Exidia glandulosa HHB12029 TaxID=1314781 RepID=A0A165Q0A2_EXIGL	No hit	0	0.00666668	0.999978	GH17(106-378)	0
AF_DN22916_c0_g1	0	0	2.27558	Ascomycota	Cross-pathway control protein A	UniRef90_W2SD94 Uncharacterized protein n=1 Tax=Cyphellophora europaea CBS 101466 TaxID=1220924 RepID=W2SD94_9EURO	No hit	0	0	1	No hit	0
AF_DN74464_c0_g1	0	0	2.27454	Basidiomycota	NA	UniRef90_A0A0D7A285 Catalase n=1 Tax=Fistulina hepatica ATCC 64428 TaxID=1128425 RepID=A0A0D7A285_9AGAR	No hit	0	0	1	No hit	0
AF_DN23506_c0_g1	0	0	2.27327	Ascomycota	NA	UniRef90_A0A178E598 Uncharacterized protein n=1 Tax=Pyrenochaeta sp. DS3sAY3a TaxID=765867 RepID=A0A178E598_9PLEO	No hit	0	0	1	No hit	0
AF_DN26294_c0_g1	0	0	2.27265	Ascomycota	NA	UniRef90_R1GQM9 Putative c2h2 transcription factor protein n=5 Tax=Botryosphaeriaceae TaxID=45131 RepID=R1GQM9_BOTPV	No hit	0	0	1	No hit	0
AF_DN93048_c0_g1	0	0.0191327	2.27149	Basidiomycota	NA	UniRef90_A0A067SA61 Uncharacterized protein n=1 Tax=Galerina marginata (strain CBS 339.88) TaxID=685588 RepID=A0A067SA61_GALM3	No hit	0	0.0159878	0.999872	No hit	0
AF_DN62060_c0_g1	0	0	2.27147	Ascomycota	NA	UniRef90_Q0TYW2 Uncharacterized protein n=16 Tax=Pleosporales TaxID=92860 RepID=Q0TYW2_PHANO	No hit	0	0	1	No hit	0	gnl|TC-DB|Q9FJH6|3.A.1.121.10 ABC transporter F family member 1 OS=Arabidopsis thaliana OX=3702 GN=ABCF1 PE=2 SV=1	74.7826
AF_DN83587_c0_g1	0	0	2.27074	Ascomycota	NA	UniRef90_A0A0B8N719 Uncharacterized protein n=1 Tax=Talaromyces cellulolyticus TaxID=1472165 RepID=A0A0B8N719_9EURO	No hit	0	0	1	No hit	0
AF_DN98060_c0_g1	0	0	2.27007	Ascomycota	NA	UniRef90_M7SLB0 Putative nmral1 protein n=1 Tax=Eutypa lata (strain UCR-EL1) TaxID=1287681 RepID=M7SLB0_EUTLA	No hit	0	0	1	No hit	0
AF_DN67054_c0_g1	0	0	2.26962	Ascomycota	Polysaccharide deacetylase	UniRef90_R7YQF7 Uncharacterized protein n=1 Tax=Coniosporium apollinis (strain CBS 100218) TaxID=1168221 RepID=R7YQF7_CONA1	No hit	0	0	1	CE4(38-159)	0
AF_DN27793_c0_g1	0	0.0144635	2.26597	No hit found	NA	UniRef90_A8NV12 Uncharacterized protein n=1 Tax=Coprinopsis cinerea (strain Okayama-7 / 130 / ATCC MYA-4618 / FGSC 9003)TaxID=240176 RepID=A8NV12_COPC7	No hit	0	0.0121319	0.999926	No hit	0
AF_DN86058_c0_g1	0	0	2.26566	Ascomycota	NA	UniRef90_A0A225AWK2 Uncharacterized protein n=1 Tax=Talaromyces atroroseus TaxID=1441469 RepID=A0A225AWK2_9EURO	No hit	0	0	1	No hit	0
AF_DN4166_c0_g1	0	0	2.2651	Ascomycota	Thioredoxin reductase	UniRef90_A0A177CQ31 FAD/NAD(P)-binding domain-containing protein n=1 Tax=Paraphaeosphaeria sporulosa TaxID=1460663 RepID=A0A177CQ31_9PLEO	No hit	0	0	1	No hit	0
AF_DN93106_c0_g1	0	0.00966023	2.26465	Ascomycota	ATP dependent RNA helicase	UniRef90_A0A093V3Q2 ATP-dependent RNA helicase sub2 n=3 Tax=Talaromyces marneffei TaxID=37727 RepID=A0A093V3Q2_TALMA	No hit	0	0.00812536	0.999967	No hit	0	gnl|TC-DB|Q07478|3.A.22.1.1 ATP-dependent RNA helicase SUB2 OS=Saccharomyces cerevisiae (strain ATCC 204508 / S288c) GN=SUB2 PE=1 SV=1	86.6261
AF_DN61546_c0_g1	0	0	2.26455	Ascomycota	Transcriptional regulator HMG type	UniRef90_U7Q6N6 Non-histone chromosomal protein 6 n=3 Tax=Sporothrix TaxID=29907 RepID=U7Q6N6_SPOS1	No hit	0	0	1	No hit	0
AF_DN83122_c0_g1	0	0	2.26445	Basidiomycota	RNA-binding domain-containing	UniRef90_A0A067TMJ3 Uncharacterized protein n=1 Tax=Galerina marginata (strain CBS 339.88) TaxID=685588 RepID=A0A067TMJ3_GALM3	No hit	0	0	1	No hit	0
AF_DN59043_c0_g1	0	0	2.26347	Basidiomycota	NA	UniRef90_A0A167L6G4 Histone H2B n=3 Tax=Dacrymycetaceae TaxID=5254 RepID=A0A167L6G4_9Basidiomycota	No hit	0	0	1	No hit	0
AF_DN55344_c0_g1	0	0	2.26344	Ascomycota	NA	UniRef90_A0A2H3IP50 Acyl transferase/acyl hydrolase/lysophospholipase n=1 Tax=Penicillium occitanis TaxID=290292 RepID=A0A2H3IP50_9EURO	No hit	0	0	1	No hit	0
AF_DN121_c0_g1	0	0	2.26281	Basidiomycota	NA	UniRef90_K5WRD1 Uncharacterized protein n=4 Tax=Polyporales TaxID=5303 RepID=K5WRD1_PHACS	No hit	0	0	1	No hit	0
AF_DN3633_c0_g1	0	0	2.26254	Basidiomycota	Bleomycin hydrolases and aminopeptidases of cysteine protease family	UniRef90_A0A067SYC8 Uncharacterized protein n=1 Tax=Galerina marginata (strain CBS 339.88) TaxID=685588 RepID=A0A067SYC8_GALM3	No hit	0	0	1	No hit	0
AF_DN105562_c0_g1	0	0	2.26233	Ascomycota	NA	UniRef90_B8ME74 C2H2 transcription factor (Seb1), putative n=1 Tax=Talaromyces stipitatus (strain ATCC 10500 / CBS 375.48/ QM 6759 / NRRL 1006) TaxID=441959 RepID=B8ME74_TALSN	No hit	0	0	1	No hit	0
AF_DN70135_c0_g1	0	0	2.26206	Ascomycota	NA	UniRef90_A0A225AG35 Uncharacterized protein n=1 Tax=Talaromyces atroroseus TaxID=1441469 RepID=A0A225AG35_9EURO	No hit	0	0	1	No hit	0
AF_DN70151_c0_g1	0	0	2.26076	Basidiomycota	Ribosomal protein L13 (Fragment)	UniRef90_A0A2A9NNB7 60S ribosomal protein L13 n=1 Tax=Amanita thiersii Skay4041 TaxID=703135 RepID=A0A2A9NNB7_9AGAR	No hit	0	0	1	No hit	0
AF_DN78537_c0_g1	0	0	2.26001	Ascomycota	Chaperone heat shock protein hsp12	UniRef90_A0A1Y1YQS1 Heat shock protein 9/12-domain-containing protein n=1 Tax=Clohesyomyces aquaticus TaxID=1231657 RepID=A0A1Y1YQS1_9PLEO	No hit	0	0	1	No hit	0
AF_DN79660_c0_g1	0	0	2.25829	Ascomycota	Calcipressin family protein	UniRef90_A0A165A6J1 Calcipressin n=1 Tax=Xylona heveae TC161 TaxID=1328760 RepID=A0A165A6J1_9PEZI	No hit	0	0	1	No hit	0
AF_DN60953_c0_g1	0	0	2.25733	Ascomycota	NA	UniRef90_W2S317 Uncharacterized protein n=1 Tax=Cyphellophora europaea CBS 101466 TaxID=1220924 RepID=W2S317_9EURO	No hit	0	0	1	No hit	0
AF_DN98912_c0_g1	0	0.0331293	2.25724	Ascomycota	NA	No hits	No hit	0	0.0275896	0.999619	No hit	0
AF_DN57121_c0_g1	0	0	2.2564	Basidiomycota	Ribosomal protein S2 (Fragment)	UniRef90_A0A151W0A5 40S ribosomal protein S2 n=86 Tax=Agaricomycetes TaxID=155619 RepID=A0A151W0A5_HYPMA	No hit	0	0	1	No hit	0
AF_DN91638_c0_g1	0	0	2.25548	Basidiomycota	NA	UniRef90_A0A067SVR7 Uncharacterized protein n=1 Tax=Galerina marginata (strain CBS 339.88) TaxID=685588 RepID=A0A067SVR7_GALM3	No hit	0	0	1	No hit	0
AF_DN30266_c1_g1	0	0	2.25497	Ascomycota	NA	UniRef90_E5KJ91 Heat shock protein Hsp88 (Fragment) n=5 Tax=Pleosporaceae TaxID=28556 RepID=E5KJ91_9PLEO	Hsp70	0	0	1	No hit	0
AF_DN86874_c0_g1	0	0	2.25443	Ascomycota	Cytoskeleton assembly control protein (Fragment)	UniRef90_B8MMU1 Cytoskeleton assembly control protein Sla2, putative n=4 Tax=Eurotiales TaxID=5042 RepID=B8MMU1_TALSN	No hit	0	0	1	No hit	0
AF_DN73220_c0_g1	0	0	2.25182	Ascomycota	NA	UniRef90_A0A1Y1Z8Y4 Uncharacterized protein n=1 Tax=Clohesyomyces aquaticus TaxID=1231657 RepID=A0A1Y1Z8Y4_9PLEO	No hit	0	0	1	No hit	0
AF_DN101612_c0_g1	0	0	2.25048	Ascomycota	Transaldolase (Fragment)	UniRef90_A0A2H3FJY5 Transaldolase n=3 Tax=Dermateaceae TaxID=76657 RepID=A0A2H3FJY5_9HELO	No hit	0	0	1	No hit	0
AF_DN16532_c0_g1	0	0	2.25004	Ascomycota	Heat shock protein Hsp88	UniRef90_E5KJ91 Heat shock protein Hsp88 (Fragment) n=5 Tax=Pleosporaceae TaxID=28556 RepID=E5KJ91_9PLEO	Hsp70	0	0	1	No hit	0
AF_DN92485_c0_g1	0	0.0138567	2.24861	Ascomycota	NA	UniRef90_A0A1Y1ZF07 Uncharacterized protein n=1 Tax=Clohesyomyces aquaticus TaxID=1231657 RepID=A0A1Y1ZF07_9PLEO	No hit	0	0.0116791	0.999932	No hit	0
AF_DN59721_c0_g1	0	0	2.2484	Basidiomycota	NA	UniRef90_V2XA32 Uncharacterized protein n=2 Tax=Moniliophthora roreri TaxID=221103 RepID=V2XA32_MONRO	No hit	0	0	1	No hit	0
AF_DN83834_c0_g1	0	0	2.24796	Ascomycota	NA	UniRef90_A0A1Y2AAJ6 Uncharacterized protein n=1 Tax=Clohesyomyces aquaticus TaxID=1231657 RepID=A0A1Y2AAJ6_9PLEO	No hit	0	0	1	No hit	0
AF_DN75881_c0_g1	0	0	2.24567	No hit found	NA	No hits	No hit	0	0	1	No hit	0
AF_DN101482_c0_g1	0	0	2.24499	Ascomycota	NA	UniRef90_A0A0D2ATV1 Uncharacterized protein (Fragment) n=1 Tax=Exophiala oligosperma TaxID=215243 RepID=A0A0D2ATV1_9EURO	No hit	0	0	1	No hit	0
AF_DN107272_c0_g1	0	0	2.24409	Ascomycota	N-acetylglucosamine-6-phosphate deacetylase	UniRef90_E5A891 Similar to n-acetylglucosamine-6-phosphate deacetylase n=1 Tax=Leptosphaeria maculans (strain JN3 / isolate v23.1.3 / race Av1-4-5-6-7-8) TaxID=985895 RepID=E5A891_LEPMJ	No hit	0	0	1	CE9(3-168)	0
AF_DN75532_c0_g1	0	0	2.24355	No hit found	NA	UniRef90_W2RTL5 Uncharacterized protein n=1 Tax=Cyphellophora europaea CBS 101466 TaxID=1220924 RepID=W2RTL5_9EURO	No hit	0	0	1	No hit	0
AF_DN54754_c0_g1	0	0	2.24337	Basidiomycota	Biotrophy-associated secreted protein 2	UniRef90_V2XDI9 Biotrophy-associated secreted protein 2 n=2 Tax=Moniliophthora roreri TaxID=221103 RepID=V2XDI9_MONRO	No hit	0	0	1	No hit	SP(Sec/SPI)
AF_DN103642_c0_g1	0	0	2.24201	Ascomycota	NA	UniRef90_W2RSB1 Uncharacterized protein n=1 Tax=Cyphellophora europaea CBS 101466 TaxID=1220924 RepID=W2RSB1_9EURO	No hit	0	0	1	No hit	0
AF_DN64071_c0_g1	0.0099638	0	2.24088	Basidiomycota	Macrofage activating glycoprotein, putative	UniRef90_A0A0C9XEG5 Unplaced genomic scaffold K443scaffold_254, whole genome shotgun sequence n=1 Tax=Laccaria amethystina LaAM-08-1 TaxID=1095629 RepID=A0A0C9XEG5_9AGAR	No hit	0.0084315	0	0.999964	No hit	SP(Sec/SPI)
AF_DN98727_c0_g1	0	0	2.24049	No hit found	NA	UniRef90_A0A1Y1YDB1 Uncharacterized protein n=1 Tax=Clohesyomyces aquaticus TaxID=1231657 RepID=A0A1Y1YDB1_9PLEO	No hit	0	0	1	No hit	0
AF_DN54761_c0_g1	0	0	2.24001	Ascomycota	Basic-leucine zipper domain	UniRef90_A0A0G2GXP4 Putative bzip transcription factor n=1 Tax=Phaeomoniella chlamydospora TaxID=158046 RepID=A0A0G2GXP4_9EURO	No hit	0	0	1	No hit	0
AF_DN67412_c0_g1	0	0	2.23967	Ascomycota	NA	UniRef90_A0A1Q5Q8I4 Uncharacterized protein n=1 Tax=Talaromyces atroroseus TaxID=1441469 RepID=A0A1Q5Q8I4_9EURO	No hit	0	0	1	No hit	0
AF_DN66882_c0_g1	0	0	2.23882	Ascomycota	NA	UniRef90_A0A1Y2A0Q9 Uncharacterized protein n=1 Tax=Clohesyomyces aquaticus TaxID=1231657 RepID=A0A1Y2A0Q9_9PLEO	No hit	0	0	1	No hit	SP(Sec/SPI)
AF_DN103221_c0_g1	0	0	2.23862	Ascomycota	NA	UniRef90_A0A225ABT8 Uncharacterized protein n=1 Tax=Talaromyces atroroseus TaxID=1441469 RepID=A0A225ABT8_9EURO	No hit	0	0	1	No hit	0
AF_DN107642_c0_g1	0	0	2.23856	Ascomycota	NA	UniRef90_B6Q585 Uncharacterized protein n=1 Tax=Talaromyces marneffei (strain ATCC 18224 / CBS 334.59 / QM 7333) TaxID=441960 RepID=B6Q585_TALMQ	No hit	0	0	1	No hit	0
AF_DN89194_c0_g1	0	0	2.23798	Ascomycota	NA	UniRef90_A0A177C8F9 CAP20-like protein n=1 Tax=Paraphaeosphaeria sporulosa TaxID=1460663 RepID=A0A177C8F9_9PLEO	No hit	0	0	1	No hit	0
AF_DN29144_c0_g1	0	0.0249532	2.23741	Ascomycota	NA	UniRef90_A0A1Y1ZNC6 Uncharacterized protein n=1 Tax=Clohesyomyces aquaticus TaxID=1231657 RepID=A0A1Y1ZNC6_9PLEO	No hit	0	0.0209756	0.99978	No hit	0
AF_DN101053_c0_g1	0	0	2.23675	Ascomycota	NA	UniRef90_A0A0F4YW29 Calcium-transporting ATPase n=1 Tax=Rasamsonia emersonii CBS 393.64 TaxID=1408163 RepID=A0A0F4YW29_TALEM	No hit	0	0	1	No hit	0	gnl|TC-DB|Q9HDW7|3.A.3.2.35 Calcium-transporting ATPase 2 OS=Schizosaccharomyces pombe (strain 972 / ATCC 24843) GN=pmc1 PE=3 SV=1	79.8077
AF_DN92344_c0_g1	0	0	2.23665	No hit found	NA	UniRef90_A0A165IK29 Uncharacterized protein n=1 Tax=Exidia glandulosa HHB12029 TaxID=1314781 RepID=A0A165IK29_EXIGL	No hit	0	0	1	No hit	0
AF_DN98005_c0_g1	0	0	2.23624	Ascomycota	NA	UniRef90_A0A0D1YY45 Uncharacterized protein n=2 Tax=leotiomyceta TaxID=716546 RepID=A0A0D1YY45_9EURO	No hit	0	0	1	No hit	0
AF_DN82935_c0_g1	0	0	2.23528	Ascomycota	1,3-beta-glucanosyltransferase	UniRef90_A0A1Y2A039 1,3-beta-glucanosyltransferase n=1 Tax=Clohesyomyces aquaticus TaxID=1231657 RepID=A0A1Y2A039_9PLEO	No hit	0	0	1	GH72(1-292)	0
AF_DN19294_c0_g1	0	0	2.23468	Basidiomycota	Polysaccharide deacetylase	UniRef90_A0A165KVN8 Glycoside hydrolase/deacetylase n=1 Tax=Exidia glandulosa HHB12029 TaxID=1314781 RepID=A0A165KVN8_EXIGL	No hit	0	0	1	CE4(3-92)	0
AF_DN84626_c0_g1	0	0	2.23323	Ascomycota	NA	UniRef90_A0A1Y1ZBS0 Fungal-specific transcription factor domain-domain-containing protein n=1 Tax=Clohesyomyces aquaticus TaxID=1231657 RepID=A0A1Y1ZBS0_9PLEO	No hit	0	0	1	No hit	0
AF_DN58518_c0_g1	0	0	2.23099	Ascomycota	Heat shock protein 78	UniRef90_B8LVQ2 Heat shock protein/chaperonin HSP78, putative n=5 Tax=Eurotiales TaxID=5042 RepID=B8LVQ2_TALSN	Hsp100	0	0	1	No hit	0	gnl|TC-DB|Q9FI56|3.A.9.1.2 Chaperone protein ClpC1, chloroplastic OS=Arabidopsis thaliana GN=CLPC1 PE=1 SV=1	74.569
AF_DN10381_c0_g1	0	0	2.2307	Ascomycota	Transmembrane amino acid transporter	UniRef90_S7ZMT5 Uncharacterized protein n=1 Tax=Penicillium oxalicum (strain 114-2 / CGMCC 5302) TaxID=933388 RepID=S7ZMT5_PENO1	No hit	0	0	1	No hit	0
AF_DN58047_c0_g1	0.0746253	0.149396	2.22945	Basidiomycota	Glycine-rich RNA-binding protein 4, mitochondrial	UniRef90_A0A0C2Y5P8 Uncharacterized protein n=1 Tax=Hebeloma cylindrosporum h7 TaxID=686832 RepID=A0A0C2Y5P8_HEBCY	No hit	0.0608518	0.117723	0.99118	No hit	0
AF_DN101965_c0_g1	0	0	2.22917	Basidiomycota	NA	UniRef90_A0A0C3B2V5 Uncharacterized protein n=1 Tax=Serendipita vermifera MAFF 305830 TaxID=933852 RepID=A0A0C3B2V5_9HOMO	No hit	0	0	1	No hit	0
AF_DN108483_c0_g1	0	0	2.22877	Ascomycota	Cystathionine beta-lyase	UniRef90_A0A0G2ENX0 Putative cystathionine gamma-synthase n=1 Tax=Phaeomoniella chlamydospora TaxID=158046 RepID=A0A0G2ENX0_9EURO	No hit	0	0	1	No hit	0
AF_DN81094_c0_g1	0	0	2.22801	Ascomycota	NA	UniRef90_A0A2C5Z8Q1 Uncharacterized protein n=1 Tax=Ophiocordyceps camponoti-rufipedis TaxID=2004952 RepID=A0A2C5Z8Q1_9HYPO	No hit	0	0	1	No hit	0
AF_DN68899_c0_g1	0	0	2.2272	Ascomycota	NA	UniRef90_A0A1Y1ZZ87 Pleckstrin homology domain-domain-containing protein n=1 Tax=Clohesyomyces aquaticus TaxID=1231657 RepID=A0A1Y1ZZ87_9PLEO	No hit	0	0	1	No hit	0
AF_DN81524_c0_g1	0	0	2.22669	Basidiomycota	NA	UniRef90_A0A165QTW3 ABC transporter n=1 Tax=Exidia glandulosa HHB12029 TaxID=1314781 RepID=A0A165QTW3_EXIGL	No hit	0	0	1	No hit	0
AF_DN2273_c0_g1	0	0	2.22627	Basidiomycota	NA	UniRef90_A0A0H2SA78 Uncharacterized protein n=1 Tax=Schizopora paradoxa TaxID=27342 RepID=A0A0H2SA78_9HOMO	No hit	0	0	1	PL35(27-159)	0
AF_DN78772_c0_g1	0	0	2.22604	Basidiomycota	NA	UniRef90_G4TWX0 Uncharacterized protein n=1 Tax=Serendipita indica (strain DSM 11827) TaxID=1109443 RepID=G4TWX0_SERID	No hit	0	0	1	No hit	SP(Sec/SPI)
AF_DN66950_c0_g1	0	0	2.22393	Basidiomycota	Riboflavin aldehyde-forming enzyme	UniRef90_A0A0W0G2F8 Uncharacterized protein n=2 Tax=Moniliophthora roreri TaxID=221103 RepID=A0A0W0G2F8_9AGAR	No hit	0	0	1	No hit	0
AF_DN28883_c0_g1	0	0.080358	2.22369	Basidiomycota	NA	UniRef90_A0A0H2R7P2 Uncharacterized protein n=1 Tax=Schizopora paradoxa TaxID=27342 RepID=A0A0H2R7P2_9HOMO	No hit	0	0.0658887	0.997827	No hit	0
AF_DN24204_c0_g1	0	0	2.22313	Ascomycota	HLH transcription factor	UniRef90_A0A225AK54 Uncharacterized protein n=1 Tax=Talaromyces atroroseus TaxID=1441469 RepID=A0A225AK54_9EURO	No hit	0	0	1	No hit	0
AF_DN14869_c0_g1	0	0	2.22301	Basidiomycota	NA	UniRef90_G4TE34 Uncharacterized protein n=1 Tax=Serendipita indica (strain DSM 11827) TaxID=1109443 RepID=G4TE34_SERID	No hit	0	0	1	No hit	0
AF_DN66874_c0_g1	0	0	2.22243	Basidiomycota	NA	UniRef90_A0A067SNS7 Acyl-CoA desaturase n=1 Tax=Galerina marginata (strain CBS 339.88) TaxID=685588 RepID=A0A067SNS7_GALM3	No hit	0	0	1	No hit	0
AF_DN71791_c0_g1	0	0	2.22231	Basidiomycota	Superoxide dismutase	UniRef90_A0A067T495 Superoxide dismutase n=1 Tax=Galerina marginata (strain CBS 339.88) TaxID=685588 RepID=A0A067T495_GALM3	No hit	0	0	1	No hit	0
AF_DN69286_c0_g1	0	0	2.2223	Ascomycota	NA	UniRef90_A0A178E2L4 Uncharacterized protein n=1 Tax=Pyrenochaeta sp. DS3sAY3a TaxID=765867 RepID=A0A178E2L4_9PLEO	No hit	0	0	1	No hit	0
AF_DN59255_c0_g1	0	0	2.21958	Ascomycota	NA	UniRef90_A0A225AKJ4 Uncharacterized protein n=1 Tax=Talaromyces atroroseus TaxID=1441469 RepID=A0A225AKJ4_9EURO	No hit	0	0	1	No hit	0
AF_DN26781_c0_g1	0	0	2.21901	Ascomycota	Heat shock 70kDa protein 5	UniRef90_A0A232M762 Uncharacterized protein n=1 Tax=Elaphomyces granulatus TaxID=519963 RepID=A0A232M762_9EURO	Hsp70	0	0	1	No hit	0	gnl|TC-DB|P11021|1.A.33.1.5 78 kDa glucose-regulated protein OS=Homo sapiens GN=HSPA5 PE=1 SV=2	70.303
AF_DN17730_c0_g1	0	0	2.21809	Basidiomycota	NA	UniRef90_A0A067TFK7 Uncharacterized protein n=1 Tax=Galerina marginata (strain CBS 339.88) TaxID=685588 RepID=A0A067TFK7_GALM3	No hit	0	0	1	No hit	0
AF_DN61056_c0_g1	0	0	2.21776	Basidiomycota	NA	UniRef90_A0A0H2RJX9 Chaperonin GroL n=2 Tax=Hymenochaetales TaxID=139380 RepID=A0A0H2RJX9_9HOMO	Hsp60	0	0	1	No hit	0
AF_DN62091_c0_g1	0	0	2.21751	Ascomycota	NA	UniRef90_R1GFF1 Putative glycosyl transferase family 2 protein n=1 Tax=Botryosphaeria parva (strain UCR-NP2) TaxID=1287680 RepID=R1GFF1_BOTPV	No hit	0	0	1	No hit	0
AF_DN85130_c0_g1	0	0	2.21745	No hit found	NA	UniRef90_A0A0H2RWT7 Uncharacterized protein n=1 Tax=Schizopora paradoxa TaxID=27342 RepID=A0A0H2RWT7_9HOMO	No hit	0	0	1	No hit	0
AF_DN33657_c0_g1	0	0	2.2174	Ascomycota	Phosphoenolpyruvate carboxykinase	UniRef90_A0A0L1HTQ9 Phosphoenolpyruvate carboxykinase n=15 Tax=Dothideomycetes TaxID=147541 RepID=A0A0L1HTQ9_9PLEO	No hit	0	0	1	No hit	0
AF_DN101183_c0_g1	0	0	2.21645	Basidiomycota	NA	UniRef90_A0A165MLN4 Uncharacterized protein n=1 Tax=Exidia glandulosa HHB12029 TaxID=1314781 RepID=A0A165MLN4_EXIGL	No hit	0	0	1	No hit	0
AF_DN59959_c0_g1	0	0	2.21486	No hit found	NA	No hits	No hit	0	0	1	No hit	0
AF_DN92281_c0_g1	0	0	2.2132	Basidiomycota	NA	UniRef90_A0A0C3C446 Uncharacterized protein n=2 Tax=Agaricales TaxID=5338 RepID=A0A0C3C446_HEBCY	No hit	0	0	1	No hit	0
AF_DN88021_c0_g1	0	0	2.21254	Ascomycota	NA	UniRef90_A0A1Q5Q9J5 Uncharacterized protein n=1 Tax=Talaromyces atroroseus TaxID=1441469 RepID=A0A1Q5Q9J5_9EURO	No hit	0	0	1	No hit	0
AF_DN10736_c0_g1	0	0	2.21077	Ascomycota	p-loop containing nucleoside triphosphate hydrolase	UniRef90_A0A2B7YZ35 GTP-binding protein ypt1 n=1 Tax=Emmonsia crescens TaxID=73230 RepID=A0A2B7YZ35_9EURO	No hit	0	0	1	No hit	0
AF_DN101577_c0_g1	0	0	2.21058	Ascomycota	NA	UniRef90_A0A225AIL1 Uncharacterized protein n=1 Tax=Talaromyces atroroseus TaxID=1441469 RepID=A0A225AIL1_9EURO	No hit	0	0	1	No hit	SP(Sec/SPI)
AF_DN67863_c0_g1	0	0	2.21056	Ascomycota	NA	UniRef90_A0A1Q5QBP6 Uncharacterized protein n=1 Tax=Talaromyces atroroseus TaxID=1441469 RepID=A0A1Q5QBP6_9EURO	No hit	0	0	1	No hit	0
AF_DN71664_c0_g1	0	0	2.21025	Ascomycota	Putative Dehydrogenase kinase	UniRef90_B8MRQ9 Uncharacterized protein n=4 Tax=Eurotiales TaxID=5042 RepID=B8MRQ9_TALSN	No hit	0	0	1	No hit	0
AF_DN83310_c0_g1	0	0	2.20997	Ascomycota	NA	UniRef90_A0A178EF05 Calcium/proton exchanger n=1 Tax=Pyrenochaeta sp. DS3sAY3a TaxID=765867 RepID=A0A178EF05_9PLEO	No hit	0	0	1	No hit	0
AF_DN106418_c0_g1	0	0	2.20989	No hit found	NA	No hits	No hit	0	0	1	No hit	0
AF_DN59825_c0_g1	0	0	2.20898	No hit found	NA	UniRef90_A0A067U0F0 Uncharacterized protein n=1 Tax=Galerina marginata (strain CBS 339.88) TaxID=685588 RepID=A0A067U0F0_GALM3	No hit	0	0	1	No hit	0
AF_DN43274_c2_g1	0	0	2.20725	Ascomycota	NA	UniRef90_A0A1Y1ZZJ6 Uncharacterized protein n=1 Tax=Clohesyomyces aquaticus TaxID=1231657 RepID=A0A1Y1ZZJ6_9PLEO	No hit	0	0	1	No hit	0
AF_DN104132_c0_g1	0	0	2.20687	Ascomycota	Ran-specific GTPase-activating protein 1 (Fragment)	UniRef90_A0A225AUS9 Uncharacterized protein n=1 Tax=Talaromyces atroroseus TaxID=1441469 RepID=A0A225AUS9_9EURO	No hit	0	0	1	No hit	0
AF_DN73515_c0_g1	0	0	2.20661	Ascomycota	NA	UniRef90_A0A1Y1YHP9 Uncharacterized protein n=1 Tax=Clohesyomyces aquaticus TaxID=1231657 RepID=A0A1Y1YHP9_9PLEO	No hit	0	0	1	No hit	0
AF_DN65920_c0_g1	0	0	2.20641	Ascomycota	NA	UniRef90_E5KJ91 Heat shock protein Hsp88 (Fragment) n=5 Tax=Pleosporaceae TaxID=28556 RepID=E5KJ91_9PLEO	Hsp70	0	0	1	No hit	0
AF_DN96033_c0_g1	0	0	2.2061	Ascomycota	NA	UniRef90_A0A225B5P4 Uncharacterized protein n=1 Tax=Talaromyces atroroseus TaxID=1441469 RepID=A0A225B5P4_9EURO	No hit	0	0	1	No hit	0
AF_DN93637_c0_g1	0	0	2.20588	Ascomycota	NA	UniRef90_A0A1Y1ZSY5 Amino acid permease/ SLC12A domain-containing protein n=1 Tax=Clohesyomyces aquaticus TaxID=1231657 RepID=A0A1Y1ZSY5_9PLEO	No hit	0	0	1	No hit	SP(Sec/SPI)	gnl|TC-DB|P15380|2.A.3.10.3 Proline-specific permease - Saccharomyces cerevisiae (Baker's yeast).	71.3235
AF_DN98516_c0_g1	0	0	2.20575	Ascomycota	NA	UniRef90_A0A0F7VI62 Putative EH domain binding protein epsin 2 n=3 Tax=Penicillium TaxID=5073 RepID=A0A0F7VI62_9EURO	No hit	0	0	1	No hit	0
AF_DN67102_c0_g1	0	0.0121808	2.20566	Ascomycota	ZPR1 zinc-finger domain family protein	UniRef90_A0A225AKB7 Uncharacterized protein n=1 Tax=Talaromyces atroroseus TaxID=1441469 RepID=A0A225AKB7_9EURO	No hit	0	0.0103926	0.999946	No hit	0
AF_DN101255_c0_g1	0	0	2.20536	Ascomycota	NA	UniRef90_A0A1Y1ZJX3 Kinase-like domain-containing protein n=1 Tax=Clohesyomyces aquaticus TaxID=1231657 RepID=A0A1Y1ZJX3_9PLEO	No hit	0	0	1	No hit	0
AF_DN83306_c0_g1	0	0	2.20509	Ascomycota	NADH-dependent flavin oxidoreductase	UniRef90_A0A1Y2A636 Uncharacterized protein n=1 Tax=Clohesyomyces aquaticus TaxID=1231657 RepID=A0A1Y2A636_9PLEO	No hit	0	0	1	No hit	0
AF_DN107594_c0_g1	0	0	2.20424	Ascomycota	NA	UniRef90_A0A1Y1YAV2 Transcription factor PAP1 (Fragment) n=1 Tax=Clohesyomyces aquaticus TaxID=1231657 RepID=A0A1Y1YAV2_9PLEO	No hit	0	0	1	No hit	0
AF_DN27401_c0_g1	0	0	2.20244	No hit found	NA	UniRef90_A0A1Q1N6L9 Replicase n=1 Tax=Agaricus bisporus virus 6 TaxID=1945750 RepID=A0A1Q1N6L9_9VIRU	No hit	0	0	1	No hit	0
AF_DN5354_c0_g1	0	0	2.20214	Basidiomycota	Non-ribosomal peptide synthetase	UniRef90_A0A067SRH6 Uncharacterized protein n=1 Tax=Galerina marginata (strain CBS 339.88) TaxID=685588 RepID=A0A067SRH6_GALM3	No hit	0	0	1	No hit	0
AF_DN89387_c0_g1	0	0	2.20038	Basidiomycota	NA	UniRef90_A0A0C2XW23 Uncharacterized protein n=1 Tax=Hebeloma cylindrosporum h7 TaxID=686832 RepID=A0A0C2XW23_HEBCY	No hit	0	0	1	No hit	0
AF_DN57927_c0_g1	0	0	2.20033	Basidiomycota	NA	UniRef90_A0A165JEA9 Uncharacterized protein n=1 Tax=Exidia glandulosa HHB12029 TaxID=1314781 RepID=A0A165JEA9_EXIGL	No hit	0	0	1	No hit	0
AF_DN75854_c0_g1	0	0	2.20006	Basidiomycota	Luminal-binding protein (Fragment)	UniRef90_V2WVN8 Hsp70 chaperone n=2 Tax=Moniliophthora roreri TaxID=221103 RepID=V2WVN8_MONRO	Hsp70	0	0	1	No hit	0
AF_DN108948_c0_g1	0	0	2.19594	Basidiomycota	NA	No hits	No hit	0	0	1	No hit	0
AF_DN96449_c0_g1	0	0	2.19491	Basidiomycota	Transitional endoplasmic reticulum ATPase 2	UniRef90_A0A165XA66 Valosin-containing protein n=1 Tax=Fibularhizoctonia sp. CBS 109695 TaxID=436010 RepID=A0A165XA66_9HOMO	No hit	0	0	1	No hit	0	gnl|TC-DB|P54609|3.A.16.1.5 Cell division control protein 48 homolog A OS=Arabidopsis thaliana OX=3702 GN=CDC48A PE=1 SV=1	76.3636
AF_DN101159_c0_g1	0	0	2.19242	Ascomycota	Casein kinase II beta 2 subunit	UniRef90_A0A225ACP2 Uncharacterized protein n=1 Tax=Talaromyces atroroseus TaxID=1441469 RepID=A0A225ACP2_9EURO	No hit	0	0	1	No hit	0
AF_DN10223_c0_g1	0	0	2.19216	Ascomycota	4-hydroxyphenylpyruvate dioxygenase	UniRef90_A0A178EJZ8 4-hydroxyphenylpyruvate dioxygenase n=1 Tax=Pyrenochaeta sp. DS3sAY3a TaxID=765867 RepID=A0A178EJZ8_9PLEO	No hit	0	0	1	No hit	0
AF_DN22469_c0_g1	0	0	2.19194	No hit found	NA	UniRef90_A0A0C3QFF3 Uncharacterized protein n=1 Tax=Tulasnella calospora MUT 4182 TaxID=1051891 RepID=A0A0C3QFF3_9HOMO	No hit	0	0	1	No hit	0
AF_DN102909_c0_g1	0	0	2.18956	Basidiomycota	NA	UniRef90_A0A1J8QB23 Uncharacterized protein n=1 Tax=Rhizopogon vesiculosus TaxID=180088 RepID=A0A1J8QB23_9HOMO	No hit	0	0	1	No hit	0
AF_DN63392_c0_g1	0	0	2.18885	Ascomycota	NA	No hits	No hit	0	0	1	No hit	0
AF_DN20498_c0_g1	0	0	2.1885	Ascomycota	NA	UniRef90_A0A2H3IE01 Glycoside hydrolase, superfamily n=1 Tax=Penicillium occitanis TaxID=290292 RepID=A0A2H3IE01_9EURO	No hit	0	0	1	No hit	0
AF_DN90227_c0_g1	0	0	2.18793	No hit found	NA	No hits	No hit	0	0	1	No hit	0
AF_DN9602_c0_g1	0	0	2.18786	Ascomycota	Glycoside hydrolase family 128 protein (Fragment)	UniRef90_A0A177CWB6 Uncharacterized protein n=1 Tax=Paraphaeosphaeria sporulosa TaxID=1460663 RepID=A0A177CWB6_9PLEO	No hit	0	0	1	GH128(123-340)	0
AF_DN60189_c0_g1	0	0	2.18696	No hit found	NA	No hits	No hit	0	0	1	No hit	0
AF_DN609_c0_g1	0	0.0149625	2.18691	Ascomycota	Heat shock protein SSB1	UniRef90_A0A1Y2MBC0 Uncharacterized protein n=1 Tax=Epicoccum nigrum TaxID=105696 RepID=A0A1Y2MBC0_EPING	Hsp70	0	0.0128126	0.999918	No hit	0
AF_DN57007_c0_g1	0	0	2.18657	Ascomycota	Response to stress	UniRef90_R7YY23 Uncharacterized protein n=1 Tax=Coniosporium apollinis (strain CBS 100218) TaxID=1168221 RepID=R7YY23_CONA1	ACD	0	0	1	No hit	0
AF_DN97763_c0_g1	0	0	2.18614	Ascomycota	NA	UniRef90_A0A1Y1Z0N7 Uncharacterized protein n=1 Tax=Clohesyomyces aquaticus TaxID=1231657 RepID=A0A1Y1Z0N7_9PLEO	No hit	0	0	1	No hit	0
AF_DN106483_c0_g1	0	0	2.18584	Ascomycota	NA	UniRef90_A0A225AYF7 Uncharacterized protein n=1 Tax=Talaromyces atroroseus TaxID=1441469 RepID=A0A225AYF7_9EURO	No hit	0	0	1	No hit	0
AF_DN89412_c0_g1	0	0	2.18531	Ascomycota	NA	UniRef90_A0A225AKR4 Uncharacterized protein n=1 Tax=Talaromyces atroroseus TaxID=1441469 RepID=A0A225AKR4_9EURO	No hit	0	0	1	No hit	0
AF_DN106035_c0_g1	0	0	2.18482	Ascomycota	NA	UniRef90_A0A0U1M6L8 Eukaryotic translation initiation factor 3 subunit C n=1 Tax=Talaromyces islandicus TaxID=28573 RepID=A0A0U1M6L8_TALIS	No hit	0	0	1	No hit	0
AF_DN79068_c0_g1	0	0	2.18466	Basidiomycota	Heat shock protein 70 (Fragment)	UniRef90_W4KI26 Uncharacterized protein n=12 Tax=Eukaryota TaxID=2759 RepID=W4KI26_9HOMO	Hsp70	0	0	1	No hit	0	gnl|TC-DB|P10591|3.A.16.1.6 Heat shock protein SSA1 OS=Saccharomyces cerevisiae (strain ATCC 204508 / S288c) OX=559292 GN=SSA1 PE=1 SV=4	78.9189
AF_DN97789_c0_g1	0	0	2.18423	Basidiomycota	NA	No hits	No hit	0	0	1	No hit	0
AF_DN61196_c0_g1	0	0	2.1842	Ascomycota	NA	UniRef90_A0A163B4V7 2 iron, 2 sulfur cluster binding n=2 Tax=Didymellaceae TaxID=683158 RepID=A0A163B4V7_DIDRA	No hit	0	0	1	No hit	0
AF_DN30102_c0_g1	0	0	2.18391	Basidiomycota	NA	UniRef90_A0A067STD3 Uncharacterized protein n=1 Tax=Galerina marginata (strain CBS 339.88) TaxID=685588 RepID=A0A067STD3_GALM3	No hit	0	0	1	No hit	0
AF_DN79841_c0_g1	0	0	2.18237	Ascomycota	NA	UniRef90_A0A178ATC7 Uncharacterized protein n=1 Tax=Stagonospora sp. SRC1lsM3a TaxID=765868 RepID=A0A178ATC7_9PLEO	No hit	0	0	1	No hit	0
AF_DN62581_c0_g1	0	0	2.18132	Ascomycota	NA	No hits	No hit	0	0	1	No hit	0
AF_DN72372_c0_g1	0	0	2.18072	No hit found	NA	UniRef90_B6QCC1 PAPA-1-like conserved region protein n=4 Tax=Talaromyces marneffei TaxID=37727 RepID=B6QCC1_TALMQ	Hsp90	0	0	1	No hit	0
AF_DN6659_c0_g1	0	0	2.18003	Ascomycota	NA	UniRef90_A0A225B5V2 Uncharacterized protein n=1 Tax=Talaromyces atroroseus TaxID=1441469 RepID=A0A225B5V2_9EURO	No hit	0	0	1	No hit	0
AF_DN108630_c0_g1	0	0	2.17877	Ascomycota	NA	UniRef90_K2RPP6 Uncharacterized protein n=1 Tax=Macrophomina phaseolina (strain MS6) TaxID=1126212 RepID=K2RPP6_MACPH	No hit	0	0	1	No hit	0
AF_DN107308_c0_g1	0	0	2.17855	No hit found	NA	No hits	No hit	0	0	1	No hit	0
AF_DN60429_c0_g1	0	0	2.17851	Ascomycota	NA	UniRef90_W9XLQ4 Uncharacterized protein n=1 Tax=Capronia epimyces CBS 606.96 TaxID=1182542 RepID=W9XLQ4_9EURO	No hit	0	0	1	No hit	0
AF_DN75813_c0_g1	0	0	2.17812	Ascomycota	Acid protease (Fragment)	UniRef90_A0A2H3J9S0 Peptidase aspartic, catalytic n=1 Tax=Penicillium occitanis TaxID=290292 RepID=A0A2H3J9S0_9EURO	No hit	0	0	1	No hit	0
AF_DN75285_c0_g1	0	0	2.17697	Basidiomycota	NA	UniRef90_A0A0H2RPV0 Uncharacterized protein n=1 Tax=Schizopora paradoxa TaxID=27342 RepID=A0A0H2RPV0_9HOMO	No hit	0	0	1	No hit	0
AF_DN62104_c0_g1	0	0	2.17621	Basidiomycota	NA	UniRef90_A0A0C3ATY2 Glycoside hydrolase family 61 protein n=1 Tax=Serendipita vermifera MAFF 305830 TaxID=933852 RepID=A0A0C3ATY2_9HOMO	No hit	0	0	1	AA9(22-115)	0
AF_DN93710_c0_g1	0	0	2.17619	Ascomycota	NA	UniRef90_A0A093XKS4 Protein SPT2 like n=2 Tax=Talaromyces marneffei TaxID=37727 RepID=A0A093XKS4_TALMA	No hit	0	0	1	No hit	0
AF_DN70003_c0_g1	0	0	2.17574	Basidiomycota	Ribosomal protein 51 of the small subunit	UniRef90_A8PH23 40S ribosomal protein S17 n=5 Tax=Agaricomycetes TaxID=155619 RepID=A8PH23_COPC7	No hit	0	0	1	No hit	0
AF_DN66290_c0_g1	0	0.0144849	2.17529	Ascomycota	NA	UniRef90_A0A1Y1ZEZ7 Alpha/Beta hydrolase protein n=1 Tax=Clohesyomyces aquaticus TaxID=1231657 RepID=A0A1Y1ZEZ7_9PLEO	No hit	0	0.0124458	0.999923	No hit	0
AF_DN57053_c0_g1	0	0.0398853	2.1751	No hit found	NA	UniRef90_A0A0G2DTU1 Uncharacterized protein n=1 Tax=Phaeomoniella chlamydospora TaxID=158046 RepID=A0A0G2DTU1_9EURO	No hit	0	0.0338325	0.999428	No hit	0
AF_DN3915_c0_g1	0	0	2.17222	Ascomycota	Mannan endo-1,6-alpha-mannosidase	UniRef90_W2RK14 Mannan endo-1,6-alpha-mannosidase n=1 Tax=Cyphellophora europaea CBS 101466 TaxID=1220924 RepID=W2RK14_9EURO	No hit	0	0	1	GH76(1-273)	0
AF_DN84249_c0_g1	0	0	2.17189	Ascomycota	Putative phosphorus acquisition-controlling protein	UniRef90_A0A0D2A5W4 Uncharacterized protein n=1 Tax=Exophiala spinifera TaxID=91928 RepID=A0A0D2A5W4_9EURO	No hit	0	0	1	No hit	0
AF_DN83155_c0_g1	0	0	2.17039	Basidiomycota	Lysosomal aspartic protease	UniRef90_A0A165M3T6 Acid protease n=1 Tax=Exidia glandulosa HHB12029 TaxID=1314781 RepID=A0A165M3T6_EXIGL	No hit	0	0	1	No hit	SP(Sec/SPI)
AF_DN56417_c0_g1	0	0	2.16905	Ascomycota	NA	No hits	No hit	0	0	1	No hit	0
AF_DN104958_c0_g1	0	0	2.16876	Ascomycota	NA	UniRef90_A0A1Y1YP62 SWIRM domain-containing protein FUN19 n=1 Tax=Clohesyomyces aquaticus TaxID=1231657 RepID=A0A1Y1YP62_9PLEO	No hit	0	0	1	No hit	0
AF_DN84922_c0_g1	0	0	2.1685	Ascomycota	NA	UniRef90_B2VZL0 Uncharacterized protein n=1 Tax=Pyrenophora tritici-repentis (strain Pt-1C-BFP) TaxID=426418 RepID=B2VZL0_PYRTR	No hit	0	0	1	No hit	0
AF_DN92380_c0_g1	0	0	2.16828	Ascomycota	NA	UniRef90_M2TBU4 Uncharacterized protein n=1 Tax=Cochliobolus sativus (strain ND90Pr / ATCC 201652) TaxID=665912 RepID=M2TBU4_COCSN	No hit	0	0	1	No hit	0
AF_DN65248_c0_g1	0	0	2.1672	Ascomycota	NA	UniRef90_A0A1Y2AAD1 Peroxin 13, N-terminal region-domain-containing protein n=1 Tax=Clohesyomyces aquaticus TaxID=1231657 RepID=A0A1Y2AAD1_9PLEO	No hit	0	0	1	No hit	0
AF_DN55195_c0_g1	0	0	2.16571	Ascomycota	NA	UniRef90_C5PI96 Sugar transporter family protein n=7 Tax=Coccidioides TaxID=5500 RepID=C5PI96_COCP7	No hit	0	0	1	No hit	0
AF_DN68792_c0_g1	0	0	2.16551	No hit found	NA	UniRef90_A0A0C3L595 Uncharacterized protein n=1 Tax=Tulasnella calospora MUT 4182 TaxID=1051891 RepID=A0A0C3L595_9HOMO	No hit	0	0	1	No hit	0
AF_DN78244_c0_g1	0	0	2.16407	Ascomycota	NA	UniRef90_A0A1Q5Q6N7 Catalase-peroxidase n=1 Tax=Talaromyces atroroseus TaxID=1441469 RepID=A0A1Q5Q6N7_9EURO	No hit	0	0	1	No hit	0
AF_DN7825_c0_g1	0	0	2.16401	Ascomycota	NA	UniRef90_B8M8Q3 RNA helicase (Dbp), putative n=5 Tax=Talaromyces TaxID=5094 RepID=B8M8Q3_TALSN	No hit	0	0	1	No hit	0
AF_DN60776_c0_g1	0	0	2.16323	Ascomycota	NA	UniRef90_W9Z3S3 Uncharacterized protein n=1 Tax=Capronia coronata CBS 617.96 TaxID=1182541 RepID=W9Z3S3_9EURO	No hit	0	0	1	No hit	0
AF_DN61469_c0_g1	0	0	2.16257	Ascomycota	NA	No hits	No hit	0	0	1	No hit	0
AF_DN98458_c0_g1	0	0	2.16198	Ascomycota	NA	No hits	No hit	0	0	1	No hit	0
AF_DN76542_c0_g1	0	0	2.16145	No hit found	NA	UniRef90_B8MF87 LEA domain protein n=1 Tax=Talaromyces stipitatus (strain ATCC 10500 / CBS 375.48 / QM 6759 / NRRL 1006)TaxID=441959 RepID=B8MF87_TALSN	No hit	0	0	1	No hit	0
AF_DN58650_c0_g1	0	0	2.16109	Ascomycota	Glutamine synthetase	UniRef90_B8M9G2 Glutamine synthetase n=6 Tax=Eurotiales TaxID=5042 RepID=B8M9G2_TALSN	No hit	0	0	1	No hit	0
AF_DN87907_c0_g1	0	0	2.16	Basidiomycota	NA	UniRef90_A0A165MGW0 Uncharacterized protein n=1 Tax=Exidia glandulosa HHB12029 TaxID=1314781 RepID=A0A165MGW0_EXIGL	No hit	0	0	1	No hit	0
AF_DN66756_c0_g1	0	0	2.15867	Ascomycota	NA	UniRef90_A0A177DNU2 Uncharacterized protein n=1 Tax=Alternaria alternata TaxID=5599 RepID=A0A177DNU2_ALTAL	No hit	0	0	1	No hit	0
AF_DN75961_c0_g1	0	0.0314254	2.15671	Ascomycota	NA	UniRef90_A0A0F2ME63 GPI-anchored cell wall beta-1,3-endoglucanase EglC n=3 Tax=Sporothrix TaxID=29907 RepID=A0A0F2ME63_SPOSC	No hit	0	0.0269072	0.999638	GH17(19)	0
AF_DN98063_c0_g1	0	0	2.15596	No hit found	NA	No hits	No hit	0	0	1	No hit	0
AF_DN85441_c0_g1	0	0	2.15581	Ascomycota	NA	No hits	No hit	0	0	1	No hit	0
AF_DN40992_c0_g1	0	0	2.15578	Ascomycota	BZIP transcription factor	UniRef90_A0A1Y1ZUH0 Uncharacterized protein n=1 Tax=Clohesyomyces aquaticus TaxID=1231657 RepID=A0A1Y1ZUH0_9PLEO	No hit	0	0	1	No hit	0
AF_DN85655_c0_g1	0	0.0171397	2.15547	Ascomycota	Nucleotide binding	UniRef90_A0A177CEI7 Calcineurin binding protein-like protein n=1 Tax=Paraphaeosphaeria sporulosa TaxID=1460663 RepID=A0A177CEI7_9PLEO	No hit	0	0.0147873	0.999891	No hit	0
AF_DN76546_c0_g1	0	0	2.15201	Ascomycota	NA	UniRef90_W2RTG1 Replication protein A subunit n=1 Tax=Cyphellophora europaea CBS 101466 TaxID=1220924 RepID=W2RTG1_9EURO	No hit	0	0	1	No hit	0
AF_DN55878_c0_g1	0	0	2.15196	Ascomycota	SWIRM domain	UniRef90_A0A1Y1YP62 SWIRM domain-containing protein FUN19 n=1 Tax=Clohesyomyces aquaticus TaxID=1231657 RepID=A0A1Y1YP62_9PLEO	No hit	0	0	1	No hit	0
AF_DN102634_c0_g1	0	0	2.14942	Basidiomycota	NA	UniRef90_A0A067TR88 Uncharacterized protein n=1 Tax=Galerina marginata (strain CBS 339.88) TaxID=685588 RepID=A0A067TR88_GALM3	No hit	0	0	1	No hit	0
AF_DN3402_c0_g1	0	0	2.14935	Ascomycota	NA	UniRef90_A0A1C1CPU4 Formate dehydrogenase n=14 Tax=Eukaryota TaxID=2759 RepID=A0A1C1CPU4_9EURO	No hit	0	0	1	No hit	0
AF_DN71246_c0_g1	0	0	2.14659	Ascomycota	NA	UniRef90_A0A178EMQ5 Uncharacterized protein n=1 Tax=Pyrenochaeta sp. DS3sAY3a TaxID=765867 RepID=A0A178EMQ5_9PLEO	No hit	0	0	1	No hit	0
AF_DN61843_c0_g1	0	0	2.14659	Ascomycota	Regulatory protein cys-3	UniRef90_A0A178DZ16 BZIP transcription factor-like protein n=1 Tax=Pyrenochaeta sp. DS3sAY3a TaxID=765867 RepID=A0A178DZ16_9PLEO	No hit	0	0	1	No hit	0
AF_DN95912_c0_g1	0.020444	0.0514868	2.14591	Ascomycota	BZIP transcription factor	UniRef90_W2SC72 Uncharacterized protein n=1 Tax=Cyphellophora europaea CBS 101466 TaxID=1220924 RepID=W2SC72_9EURO	No hit	0.0176383	0.0437563	0.998887	No hit	0
AF_DN79150_c0_g1	0	0	2.14539	Ascomycota	NA	UniRef90_A0A178Z2P1 Uncharacterized protein n=1 Tax=Fonsecaea erecta TaxID=1367422 RepID=A0A178Z2P1_9EURO	No hit	0	0	1	No hit	0
AF_DN56994_c0_g1	0	0	2.14463	Ascomycota	NA	UniRef90_A0A2H3II47 Uncharacterized protein n=1 Tax=Penicillium occitanis TaxID=290292 RepID=A0A2H3II47_9EURO	No hit	0	0	1	No hit	0
AF_DN91128_c0_g1	0	0	2.14441	Ascomycota	NA	UniRef90_A0A1Y1ZQN4 Uncharacterized protein n=1 Tax=Clohesyomyces aquaticus TaxID=1231657 RepID=A0A1Y1ZQN4_9PLEO	No hit	0	0	1	No hit	0
AF_DN71954_c0_g1	0	0	2.14194	Ascomycota	NA	UniRef90_B8MQI5 Fumarate reductase Osm1, putative n=4 Tax=Eurotiales TaxID=5042 RepID=B8MQI5_TALSN	No hit	0	0	1	No hit	0
AF_DN85156_c0_g1	0	0	2.14191	Ascomycota	NA	UniRef90_A0A1Y1ZUK3 Uncharacterized protein n=1 Tax=Clohesyomyces aquaticus TaxID=1231657 RepID=A0A1Y1ZUK3_9PLEO	No hit	0	0	1	No hit	0
AF_DN60660_c0_g1	0	0	2.14096	Ascomycota	NA	UniRef90_A0A163LMJ5 1,3-beta-glucanosyltransferase n=1 Tax=Didymella rabiei TaxID=5454 RepID=A0A163LMJ5_DIDRA	No hit	0	0	1	No hit	0
AF_DN97593_c0_g1	0	0.0243287	2.14018	Ascomycota	Zinc finger C2H2-type/integrase DNA-binding domain	UniRef90_E4ZYZ1 Uncharacterized protein n=1 Tax=Leptosphaeria maculans (strain JN3 / isolate v23.1.3 / race Av1-4-5-6-7-8)TaxID=985895 RepID=E4ZYZ1_LEPMJ	No hit	0	0.021002	0.999779	No hit	0
AF_DN55384_c0_g1	0	0	2.13982	No hit found	NA	No hits	No hit	0	0	1	No hit	0
AF_DN5256_c0_g1	0	0	2.13886	Ascomycota	Glutathione S-transferase	UniRef90_A0A163JEZ9 Uncharacterized protein n=2 Tax=Didymellaceae TaxID=683158 RepID=A0A163JEZ9_DIDRA	No hit	0	0	1	No hit	0
AF_DN105619_c0_g1	0	0	2.13403	Ascomycota	NA	UniRef90_A0A225ASN9 Uncharacterized protein n=1 Tax=Talaromyces atroroseus TaxID=1441469 RepID=A0A225ASN9_9EURO	No hit	0	0	1	No hit	0
AF_DN66873_c0_g1	0	0	2.1328	Basidiomycota	Phosphatidylethanolamine-binding protein	UniRef90_A0A067TQW1 Uncharacterized protein n=1 Tax=Galerina marginata (strain CBS 339.88) TaxID=685588 RepID=A0A067TQW1_GALM3	No hit	0	0	1	No hit	0
AF_DN20463_c0_g1	0	0	2.13238	Ascomycota	NA	UniRef90_A0A177D202 DUF1752-domain-containing protein n=1 Tax=Alternaria alternata TaxID=5599 RepID=A0A177D202_ALTAL	No hit	0	0	1	No hit	0
AF_DN93228_c0_g1	0	0	2.13146	Basidiomycota	NA	UniRef90_A0A0D2NZZ4 Uncharacterized protein n=1 Tax=Hypholoma sublateritium FD-334 SS-4 TaxID=945553 RepID=A0A0D2NZZ4_9AGAR	No hit	0	0	1	No hit	0
AF_DN16656_c0_g1	0	0	2.12994	Other fungi	Elongation factor 3 (Fragment)	UniRef90_A0A0L0HD63 Uncharacterized protein n=1 Tax=Spizellomyces punctatus DAOM BR117 TaxID=645134 RepID=A0A0L0HD63_SPIPN	No hit	0	0	1	No hit	0
AF_DN83371_c1_g1	0	0	2.12747	Basidiomycota	NA	UniRef90_A0A0C2WNS9 Uncharacterized protein n=1 Tax=Serendipita vermifera MAFF 305830 TaxID=933852 RepID=A0A0C2WNS9_9HOMO	No hit	0	0	1	No hit	0
AF_DN63561_c0_g1	0	0	2.12673	Ascomycota	NA	UniRef90_A0A2H3IHS4 GPR1/FUN34/yaaH n=1 Tax=Penicillium occitanis TaxID=290292 RepID=A0A2H3IHS4_9EURO	No hit	0	0	1	No hit	0	gnl|TC-DB|Q5B2K4|2.A.96.1.3 Putative uncharacterized protein (Acetate permease) OS=Emericella nidulans GN=acpA PE=4 SV=1	85.8333
AF_DN69443_c0_g1	0	0	2.12615	Ascomycota	NA	UniRef90_A0A225AXA8 Uncharacterized protein n=1 Tax=Talaromyces atroroseus TaxID=1441469 RepID=A0A225AXA8_9EURO	No hit	0	0	1	No hit	0
AF_DN74550_c0_g1	0	0	2.12597	Basidiomycota	NA	UniRef90_G4TTS6 Probable OSM1-fumarate reductase n=1 Tax=Serendipita indica (strain DSM 11827) TaxID=1109443 RepID=G4TTS6_SERID	No hit	0	0	1	No hit	0
AF_DN96145_c0_g1	0	0	2.12161	Basidiomycota	NA	UniRef90_A0A0C2Y8T9 Uncharacterized protein n=1 Tax=Hebeloma cylindrosporum h7 TaxID=686832 RepID=A0A0C2Y8T9_HEBCY	No hit	0	0	1	No hit	0
AF_DN80612_c0_g1	0	0	2.12153	Ascomycota	S-(Hydroxymethyl)glutathione dehydrogenase/alcohol dehydrogenase	UniRef90_A0A177CGG7 S-glutathione dehydrogenase n=1 Tax=Paraphaeosphaeria sporulosa TaxID=1460663 RepID=A0A177CGG7_9PLEO	No hit	0	0	1	No hit	0
AF_DN73360_c0_g1	0	0	2.12083	Ascomycota	Vegetative cell wall protein gp1, variant	UniRef90_A0A0G2GCX4 Putative vegetative cell wall protein gp1 n=1 Tax=Phaeomoniella chlamydospora TaxID=158046 RepID=A0A0G2GCX4_9EURO	No hit	0	0	1	No hit	0
AF_DN69160_c0_g1	0	0	2.1201	Ascomycota	Heat shock protein 42	UniRef90_Q0V0I8 Uncharacterized protein n=1 Tax=Phaeosphaeria nodorum (strain SN15 / ATCC MYA-4574 / FGSC 10173) TaxID=321614 RepID=Q0V0I8_PHANO	ACD	0	0	1	No hit	0
AF_DN17427_c0_g1	0	0	2.11952	Ascomycota	Similar to Saccharomyces cerevisiae YKR097W PCK1 Phosphoenolpyruvate carboxykinase, partial (Partial) (Fragment)	UniRef90_Q0CK89 Phosphoenolpyruvate carboxykinase n=8 Tax=Eurotiomycetidae TaxID=451871 RepID=Q0CK89_ASPTN	No hit	0	0	1	No hit	0
AF_DN10646_c0_g1	0	0	2.11782	Ascomycota	DNA-directed RNA polymerase II subunit RPB1	UniRef90_A0A1Y1YPV1 Uncharacterized protein n=1 Tax=Clohesyomyces aquaticus TaxID=1231657 RepID=A0A1Y1YPV1_9PLEO	No hit	0	0	1	No hit	0
AF_DN64836_c0_g1	0	0	2.11721	Ascomycota	Glutathione peroxidase	UniRef90_Q0UCW7 Glutathione peroxidase n=1 Tax=Phaeosphaeria nodorum (strain SN15 / ATCC MYA-4574 / FGSC 10173) TaxID=321614 RepID=Q0UCW7_PHANO	No hit	0	0	1	No hit	0
AF_DN81018_c0_g1	0	0	2.1169	Ascomycota	NA	UniRef90_A0A2H3I8E1 Pyridoxal phosphate-dependent transferase, major region, subdomain 2 n=4 Tax=Eurotiales TaxID=5042 RepID=A0A2H3I8E1_9EURO	No hit	0	0	1	No hit	0
AF_DN22810_c0_g1	0	0	2.11522	Basidiomycota	NA	UniRef90_A0A067T773 Uncharacterized protein n=1 Tax=Galerina marginata (strain CBS 339.88) TaxID=685588 RepID=A0A067T773_GALM3	No hit	0	0	1	No hit	0
AF_DN66885_c0_g1	0	0	2.11503	Ascomycota	Mannosylphosphorylation protein Mnn4	UniRef90_A0A0D1X2S8 Uncharacterized protein n=1 Tax=Exophiala mesophila TaxID=212818 RepID=A0A0D1X2S8_9EURO	No hit	0	0	1	No hit	0
AF_DN87001_c0_g1	0	0	2.11444	Ascomycota	NA	UniRef90_G2QXT2 Uncharacterized protein n=1 Tax=Thielavia terrestris (strain ATCC 38088 / NRRL 8126) TaxID=578455 RepID=G2QXT2_THITE	No hit	0	0	1	No hit	0
AF_DN101153_c0_g1	0	0	2.11431	Ascomycota	NA	UniRef90_A0A225AT79 Uncharacterized protein n=1 Tax=Talaromyces atroroseus TaxID=1441469 RepID=A0A225AT79_9EURO	No hit	0	0	1	No hit	0
AF_DN59742_c0_g1	0	0	2.113	Basidiomycota	Cytochrome b5 type b (Outer mitochondrial membrane)	UniRef90_A8NZ62 Uncharacterized protein n=1 Tax=Coprinopsis cinerea (strain Okayama-7 / 130 / ATCC MYA-4618 / FGSC 9003)TaxID=240176 RepID=A8NZ62_COPC7	No hit	0	0	1	No hit	0
AF_DN19226_c0_g1	0	0	2.11211	Ascomycota	NA	UniRef90_A0A0F4YVP6 Eukaryotic translation initiation factor 3 subunit C n=1 Tax=Rasamsonia emersonii CBS 393.64 TaxID=1408163 RepID=A0A0F4YVP6_TALEM	No hit	0	0	1	No hit	0
AF_DN68159_c0_g1	0	0	2.11091	Ascomycota	NA	UniRef90_R1GG32 Uncharacterized protein n=1 Tax=Botryosphaeria parva (strain UCR-NP2) TaxID=1287680 RepID=R1GG32_BOTPV	No hit	0	0	1	No hit	0
AF_DN107114_c0_g1	0	0	2.11079	Basidiomycota	Tubulin beta chain (Fragment)	UniRef90_A0A193DQ41 Tubulin beta chain (Fragment) n=36 Tax=Physalacriaceae TaxID=862241 RepID=A0A193DQ41_9AGAR	No hit	0	0	1	No hit	0
AF_DN17059_c0_g1	0	0	2.10963	Ascomycota	Antigenic thaumatin domain-containing protein	UniRef90_A0A1Y1ZH44 Uncharacterized protein n=1 Tax=Clohesyomyces aquaticus TaxID=1231657 RepID=A0A1Y1ZH44_9PLEO	No hit	0	0	1	No hit	SP(Sec/SPI)
AF_DN32148_c0_g1	0.0359563	0.0302665	2.10935	Basidiomycota	NA	UniRef90_A0A067TH18 Uncharacterized protein n=1 Tax=Galerina marginata (strain CBS 339.88) TaxID=685588 RepID=A0A067TH18_GALM3	No hit	0.0311136	0.0262627	0.999171	No hit	0
AF_DN93074_c0_g1	0	0	2.1078	Ascomycota	NA	UniRef90_A0A225AD81 Uncharacterized protein n=1 Tax=Talaromyces atroroseus TaxID=1441469 RepID=A0A225AD81_9EURO	No hit	0	0	1	No hit	0
AF_DN92907_c0_g1	0	0.042318	2.10769	Ascomycota	NA	UniRef90_A0A177CL11 Uncharacterized protein n=1 Tax=Paraphaeosphaeria sporulosa TaxID=1460663 RepID=A0A177CL11_9PLEO	No hit	0	0.0365289	0.999333	No hit	0
AF_DN93247_c0_g1	0	0	2.10746	Ascomycota	Heat shock protein 101	UniRef90_A0A177C215 Heat shock protein-like protein n=1 Tax=Paraphaeosphaeria sporulosa TaxID=1460663 RepID=A0A177C215_9PLEO	Hsp100	0	0	1	No hit	0
AF_DN66344_c0_g1	0	0	2.10712	Ascomycota	NA	UniRef90_B6QJ55 Cell wall glucanase (Scw11), putative n=2 Tax=Talaromyces marneffei TaxID=37727 RepID=B6QJ55_TALMQ	No hit	0	0	1	No hit	0
AF_DN76158_c0_g1	0	0	2.10712	Ascomycota	NA	No hits	No hit	0	0	1	No hit	0
AF_DN61930_c0_g1	0	0	2.10702	Ascomycota	NA	UniRef90_A0A225AFV1 Uncharacterized protein n=1 Tax=Talaromyces atroroseus TaxID=1441469 RepID=A0A225AFV1_9EURO	No hit	0	0	1	No hit	0
AF_DN32533_c0_g1	0	0	2.10571	Basidiomycota	NA	UniRef90_A0A165LNB2 Uncharacterized protein n=1 Tax=Exidia glandulosa HHB12029 TaxID=1314781 RepID=A0A165LNB2_EXIGL	No hit	0	0	1	No hit	0
AF_DN102463_c0_g1	0	0	2.10501	Ascomycota	DNA binding regulatory protein AmdX	UniRef90_A0A0G2ENT0 Putative c2h2 transcription factor n=1 Tax=Phaeomoniella chlamydospora TaxID=158046 RepID=A0A0G2ENT0_9EURO	No hit	0	0	1	No hit	0
AF_DN86997_c0_g1	0	0	2.10379	Ascomycota	NA	UniRef90_A0A0D2BUB9 Uncharacterized protein n=1 Tax=Exophiala xenobiotica TaxID=348802 RepID=A0A0D2BUB9_9EURO	No hit	0	0	1	No hit	0
AF_DN3759_c0_g1	0	0	2.10363	Basidiomycota	NA	UniRef90_A0A0C2XRH5 Uncharacterized protein n=1 Tax=Hebeloma cylindrosporum h7 TaxID=686832 RepID=A0A0C2XRH5_HEBCY	No hit	0	0	1	No hit	0
AF_DN101438_c0_g1	0	0	2.09918	Ascomycota	Manganese/iron superoxide dismutase	UniRef90_A0A2H3JA12 Manganese/iron superoxide dismutase n=1 Tax=Penicillium occitanis TaxID=290292 RepID=A0A2H3JA12_9EURO	No hit	0	0	1	No hit	0
AF_DN22125_c0_g1	0	0	2.09882	Basidiomycota	NA	UniRef90_A0A151WC09 SWR1 complex bromodomain subunit bdf1 n=1 Tax=Hypsizygus marmoreus TaxID=39966 RepID=A0A151WC09_HYPMA	No hit	0	0	1	No hit	0
AF_DN6142_c0_g1	0	0	2.09833	Ascomycota	NA	UniRef90_A0A178EPA4 Uncharacterized protein n=1 Tax=Pyrenochaeta sp. DS3sAY3a TaxID=765867 RepID=A0A178EPA4_9PLEO	No hit	0	0	1	No hit	0
AF_DN84238_c0_g1	0	0	2.09815	Basidiomycota	NA	UniRef90_A0A165FIE6 Growth factor receptor domain-containing protein n=1 Tax=Exidia glandulosa HHB12029 TaxID=1314781 RepID=A0A165FIE6_EXIGL	No hit	0	0	1	No hit	0
AF_DN77713_c0_g1	0	0	2.09786	Basidiomycota	NA	No hits	No hit	0	0	1	No hit	0
AF_DN19373_c0_g1	0	0	2.09786	Basidiomycota	NA	UniRef90_A0A067T7R4 Uncharacterized protein n=1 Tax=Galerina marginata (strain CBS 339.88) TaxID=685588 RepID=A0A067T7R4_GALM3	No hit	0	0	1	No hit	0
AF_DN66719_c0_g1	0	0	2.09741	Ascomycota	NA	UniRef90_A0A178EM96 Uncharacterized protein n=1 Tax=Pyrenochaeta sp. DS3sAY3a TaxID=765867 RepID=A0A178EM96_9PLEO	No hit	0	0	1	No hit	0
AF_DN65309_c0_g1	0	0	2.09688	Ascomycota	NA	UniRef90_A0A177C7D2 DWNN-domain-containing protein n=1 Tax=Paraphaeosphaeria sporulosa TaxID=1460663 RepID=A0A177C7D2_9PLEO	No hit	0	0	1	No hit	0
AF_DN106012_c0_g1	0	0	2.09351	Ascomycota	NA	UniRef90_A0A177C215 Heat shock protein-like protein n=1 Tax=Paraphaeosphaeria sporulosa TaxID=1460663 RepID=A0A177C215_9PLEO	Hsp100	0	0	1	No hit	0	gnl|TC-DB|Q9FI56|3.A.9.1.2 Chaperone protein ClpC1, chloroplastic OS=Arabidopsis thaliana GN=CLPC1 PE=1 SV=1	80.1887
AF_DN86330_c0_g1	0	0	2.09187	Ascomycota	Cell wall glucanase	UniRef90_A0A1Y1YFY6 Glycosyl hydrolases family 16-domain-containing protein n=1 Tax=Clohesyomyces aquaticus TaxID=1231657 RepID=A0A1Y1YFY6_9PLEO	No hit	0	0	1	GH16(114-263)	0
AF_DN77610_c0_g1	0	0	2.09172	Ascomycota	NA	UniRef90_A0A2H3I0Y0 Winged helix-turn-helix transcription repressor DNA-binding n=5 Tax=Eurotiales TaxID=5042 RepID=A0A2H3I0Y0_9EURO	No hit	0	0	1	No hit	0
AF_DN59134_c0_g1	0	0	2.09038	Ascomycota	NA	UniRef90_A0A0D1XSH4 Uncharacterized protein n=1 Tax=Exophiala mesophila TaxID=212818 RepID=A0A0D1XSH4_9EURO	No hit	0	0	1	No hit	0
AF_DN72358_c0_g1	0	0.0453317	2.09031	Basidiomycota	NA	UniRef90_A0A0H2RSJ8 DHH phosphoesterase n=1 Tax=Schizopora paradoxa TaxID=27342 RepID=A0A0H2RSJ8_9HOMO	No hit	0	0.0392637	0.999229	No hit	0
AF_DN100939_c0_g1	0	0	2.0901	Ascomycota	NA	UniRef90_H6BPN1 Uncharacterized protein n=1 Tax=Exophiala dermatitidis (strain ATCC 34100 / CBS 525.76 / NIH/UT8656) TaxID=858893 RepID=H6BPN1_EXODN	No hit	0	0	1	No hit	0
AF_DN61161_c0_g1	0	0	2.09006	Ascomycota	NA	UniRef90_W2RZV0 Uncharacterized protein n=1 Tax=Cyphellophora europaea CBS 101466 TaxID=1220924 RepID=W2RZV0_9EURO	No hit	0	0	1	No hit	0
AF_DN87684_c0_g1	0	0	2.08972	Ascomycota	NA	UniRef90_G2R027 Glycosyltransferase family 32 protein n=1 Tax=Thielavia terrestris (strain ATCC 38088 / NRRL 8126) TaxID=578455 RepID=G2R027_THITE	No hit	0	0	1	No hit	0
AF_DN80363_c0_g1	0	0	2.08942	Ascomycota	NA	UniRef90_B2WCS6 Cytochrome P450 3A3 n=2 Tax=Pyrenophora TaxID=5027 RepID=B2WCS6_PYRTR	No hit	0	0	1	No hit	0
AF_DN84739_c0_g1	0	0	2.08933	Basidiomycota	Acyl-CoA desaturase	UniRef90_A0A0C2XXB5 Acyl-CoA desaturase n=1 Tax=Hebeloma cylindrosporum h7 TaxID=686832 RepID=A0A0C2XXB5_HEBCY	No hit	0	0	1	No hit	0
AF_DN65193_c0_g1	0	0	2.08927	Ascomycota	Eukaryotic translation initiation factor eIF-1A subunit	UniRef90_C4JPD8 Eukaryotic translation initiation factor 1A n=42 Tax=leotiomyceta TaxID=716546 RepID=C4JPD8_UNCRE	No hit	0	0	1	No hit	0
AF_DN21288_c0_g1	0	0	2.0888	No hit found	NA	No hits	No hit	0	0	1	No hit	0
AF_DN19875_c1_g1	0	0	2.08833	Ascomycota	NA	UniRef90_A0A177CQ26 Fumarate reductase-like protein n=1 Tax=Paraphaeosphaeria sporulosa TaxID=1460663 RepID=A0A177CQ26_9PLEO	No hit	0	0	1	No hit	0
AF_DN7822_c0_g1	0	0	2.08745	Ascomycota	NA	UniRef90_A0A0U1M4D1 Eukaryotic translation initiation factor 3 subunit A n=1 Tax=Talaromyces islandicus TaxID=28573 RepID=A0A0U1M4D1_TALIS	No hit	0	0	1	No hit	0
AF_DN102383_c0_g1	0	0	2.08643	Ascomycota	Glyceraldehyde-3-phosphate dehydrogenase (Fragment)	UniRef90_Q4F8S8 Glyceraldehyde 3-phosphate dehydrogenase (Fragment) n=15 Tax=Lecanorineae TaxID=157822 RepID=Q4F8S8_9LECA	No hit	0	0	1	No hit	0
AF_DN55066_c0_g1	0	0	2.08529	Basidiomycota	Chitinase	UniRef90_UPI0004407567 hypothetical protein n=1 Tax=Fomitiporia mediterranea (strain MF3/22) TaxID=694068 RepID=UPI0004407567	No hit	0	0	1	No hit	0
AF_DN73894_c0_g1	0	0	2.08357	Ascomycota	NA	No hits	No hit	0	0	1	No hit	0
AF_DN56051_c0_g1	0	0	2.08328	Basidiomycota	p-loop containing nucleoside triphosphate hydrolase protein (Fragment)	UniRef90_A0A165JA46 ATP synthase subunit alpha n=1 Tax=Exidia glandulosa HHB12029 TaxID=1314781 RepID=A0A165JA46_EXIGL	No hit	0	0	1	No hit	0	gnl|TC-DB|P07251|3.A.2.1.3 ATP synthase alpha chain, mitochondrial precursor (EC 3.6.1.34) - Saccharomyces cerevisiae (Baker's yeast).	91.6256
AF_DN84018_c0_g1	0	0	2.08202	Ascomycota	NA	UniRef90_A0A1Q5Q979 Uncharacterized protein n=1 Tax=Talaromyces atroroseus TaxID=1441469 RepID=A0A1Q5Q979_9EURO	No hit	0	0	1	No hit	0
AF_DN83041_c0_g1	0	0	2.08099	Ascomycota	NA	UniRef90_A0A0G2GT28 Putative zinc finger transcription factor ace1 n=1 Tax=Phaeomoniella chlamydospora TaxID=158046 RepID=A0A0G2GT28_9EURO	No hit	0	0	1	No hit	0
AF_DN65207_c0_g1	0	0	2.0798	Ascomycota	NA	UniRef90_W2S5I5 Uncharacterized protein n=1 Tax=Cyphellophora europaea CBS 101466 TaxID=1220924 RepID=W2S5I5_9EURO	No hit	0	0	1	No hit	0
AF_DN92779_c0_g1	0	0	2.07902	Ascomycota	Fructose-bisphosphate aldolase	UniRef90_B8M548 Fructose-bisphosphate aldolase, class II n=4 Tax=Eurotiales TaxID=5042 RepID=B8M548_TALSN	No hit	0	0	1	No hit	0
AF_DN38235_c0_g1	0	0	2.07691	Ascomycota	D-cysteine desulfhydrase	UniRef90_A0A0U1LRC1 Uncharacterized protein n=1 Tax=Talaromyces islandicus TaxID=28573 RepID=A0A0U1LRC1_TALIS	No hit	0	0	1	No hit	0
AF_DN79011_c0_g1	0	0	2.07674	No hit found	NA	UniRef90_B3IXK2 Uncharacterized protein n=1 Tax=Alternaria alternata virus 1 TaxID=483537 RepID=B3IXK2_9VIRU	No hit	0	0	1	No hit	0
AF_DN57050_c0_g1	0	0	2.07563	Ascomycota	NA	UniRef90_A0A0N1NXN0 Uncharacterized protein n=1 Tax=Phialophora attae TaxID=1664694 RepID=A0A0N1NXN0_9EURO	No hit	0	0	1	No hit	0
AF_DN58042_c0_g1	0	0	2.07486	Ascomycota	NA	UniRef90_A0A163BDN1 Uncharacterized protein n=2 Tax=Didymellaceae TaxID=683158 RepID=A0A163BDN1_DIDRA	No hit	0	0	1	No hit	0
AF_DN39113_c0_g1	0	0	2.07464	Ascomycota	Chaperone DnaJ	UniRef90_W2S3N7 Chaperone DnaJ n=1 Tax=Cyphellophora europaea CBS 101466 TaxID=1220924 RepID=W2S3N7_9EURO	ACD	0	0	1	No hit	0
AF_DN73314_c0_g1	0	0	2.07298	Basidiomycota	NA	No hits	No hit	0	0	1	No hit	0
AF_DN27441_c0_g1	0	0	2.07245	Basidiomycota	MFS general substrate transporter	UniRef90_J0LEN8 Sugar transporter n=1 Tax=Auricularia subglabra (strain TFB-10046 / SS5) TaxID=717982 RepID=J0LEN8_AURST	No hit	0	0	1	No hit	0
AF_DN55199_c0_g1	0	0	2.07222	Ascomycota	NA	No hits	No hit	0	0	1	No hit	0
AF_DN76560_c0_g1	0	0	2.07207	Ascomycota	NA	No hits	No hit	0	0	1	No hit	0
AF_DN78932_c0_g1	0	0	2.07189	Ascomycota	NA	UniRef90_A0A1Y1ZEZ7 Alpha/Beta hydrolase protein n=1 Tax=Clohesyomyces aquaticus TaxID=1231657 RepID=A0A1Y1ZEZ7_9PLEO	No hit	0	0	1	No hit	0
AF_DN59508_c0_g1	0	0	2.0709	No hit found	NA	No hits	No hit	0	0	1	No hit	0
AF_DN87916_c0_g1	0	0	2.06918	Ascomycota	NA	UniRef90_H6C855 DnaJ protein, subfamily A, member 2 n=3 Tax=Herpotrichiellaceae TaxID=43219 RepID=H6C855_EXODN	DnaJ	0	0	1	No hit	0
AF_DN104315_c0_g1	0	0	2.0685	Ascomycota	NA	UniRef90_A0A0D1Z6H1 Uncharacterized protein n=1 Tax=Exophiala mesophila TaxID=212818 RepID=A0A0D1Z6H1_9EURO	No hit	0	0	1	No hit	0
AF_DN87045_c0_g1	0	0.0210805	2.06712	Ascomycota	NA	UniRef90_A0A177C4I2 Kinase-like protein n=1 Tax=Paraphaeosphaeria sporulosa TaxID=1460663 RepID=A0A177C4I2_9PLEO	No hit	0	0.0186108	0.999827	No hit	0
AF_DN83764_c0_g1	0	0	2.06621	Ascomycota	NA	UniRef90_U1GC02 Fatty acid synthase subunit alpha n=1 Tax=Endocarpon pusillum (strain Z07020 / HMAS-L-300199) TaxID=1263415 RepID=U1GC02_ENDPU	No hit	0	0	1	No hit	0
AF_DN109014_c0_g1	0	0	2.06541	Ascomycota	NA	UniRef90_W2RX25 ATP-dependent RNA helicase sub2 n=1 Tax=Cyphellophora europaea CBS 101466 TaxID=1220924 RepID=W2RX25_9EURO	No hit	0	0	1	No hit	0	gnl|TC-DB|Q07478|3.A.22.1.1 ATP-dependent RNA helicase SUB2 OS=Saccharomyces cerevisiae (strain ATCC 204508 / S288c) GN=SUB2 PE=1 SV=1	80.7018
AF_DN87031_c0_g1	0	0	2.0645	Ascomycota	C-4 methylsterol oxidase	UniRef90_M2N1S8 Uncharacterized protein n=1 Tax=Baudoinia panamericana (strain UAMH 10762) TaxID=717646 RepID=M2N1S8_BAUPA	No hit	0	0	1	No hit	0
AF_DN107913_c0_g1	0	0	2.06419	Ascomycota	NA	UniRef90_A0A135LS64 Uncharacterized protein n=1 Tax=Penicillium patulum TaxID=5078 RepID=A0A135LS64_PENPA	No hit	0	0	1	No hit	0
AF_DN76687_c0_g1	0	0	2.06363	Ascomycota	Heat shock protein 101	UniRef90_A0A1Y1LG05 Uncharacterized protein (Fragment) n=1 Tax=Photinus pyralis TaxID=7054 RepID=A0A1Y1LG05_PHOPY	Hsp100	0	0	1	No hit	0
AF_DN84316_c0_g1	0	0	2.0634	No hit found	NA	UniRef90_A0A0G2G163 Uncharacterized protein n=1 Tax=Phaeomoniella chlamydospora TaxID=158046 RepID=A0A0G2G163_9EURO	No hit	0	0	1	No hit	0
AF_DN97504_c0_g1	0	0	2.06311	No hit found	NA	No hits	No hit	0	0	1	No hit	0
AF_DN90703_c0_g1	0	0	2.06246	Basidiomycota	NA	UniRef90_A0A161YJV2 Uncharacterized protein n=1 Tax=Colletotrichum tofieldiae TaxID=708197 RepID=A0A161YJV2_9PEZI	No hit	0	0	1	No hit	0
AF_DN14314_c0_g1	0	0	2.0598	Ascomycota	NA	UniRef90_A0A1Y1ZN89 Uncharacterized protein n=1 Tax=Clohesyomyces aquaticus TaxID=1231657 RepID=A0A1Y1ZN89_9PLEO	No hit	0	0	1	No hit	0
AF_DN76552_c0_g1	0	0	2.05952	No hit found	NA	No hits	No hit	0	0	1	No hit	0
AF_DN10607_c0_g1	0	0	2.05874	Ascomycota	Cysteine-rich secretory protein family domain-containing protein	UniRef90_A0A178EHR0 Uncharacterized protein n=1 Tax=Pyrenochaeta sp. DS3sAY3a TaxID=765867 RepID=A0A178EHR0_9PLEO	No hit	0	0	1	No hit	0
AF_DN15174_c0_g1	0	0	2.05828	Basidiomycota	Putative malate dehydrogenase	UniRef90_A0A165KBU1 Uncharacterized protein n=1 Tax=Exidia glandulosa HHB12029 TaxID=1314781 RepID=A0A165KBU1_EXIGL	No hit	0	0	1	No hit	0
AF_DN93400_c0_g1	0	0	2.05769	Basidiomycota	NA	UniRef90_A0A0C2XB99 Uncharacterized protein n=1 Tax=Hebeloma cylindrosporum h7 TaxID=686832 RepID=A0A0C2XB99_HEBCY	No hit	0	0	1	No hit	0
AF_DN88472_c0_g1	0	0.041348	2.05697	Ascomycota	NA	UniRef90_A0A225B5V2 Uncharacterized protein n=1 Tax=Talaromyces atroroseus TaxID=1441469 RepID=A0A225B5V2_9EURO	No hit	0	0.0362346	0.999343	No hit	0
AF_DN77434_c0_g1	0	0	2.05545	Basidiomycota	NA	UniRef90_A0A0C2W5W3 Uncharacterized protein n=1 Tax=Serendipita vermifera MAFF 305830 TaxID=933852 RepID=A0A0C2W5W3_9HOMO	No hit	0	0	1	No hit	0
AF_DN90624_c0_g1	0	0	2.05527	Ascomycota	NA	UniRef90_W2S2D8 Inosine-5'-monophosphate dehydrogenase n=1 Tax=Cyphellophora europaea CBS 101466 TaxID=1220924 RepID=W2S2D8_9EURO	No hit	0	0	1	No hit	0
AF_DN59796_c0_g1	0	0	2.05509	Ascomycota	NA	UniRef90_A0A178AM81 Uncharacterized protein n=1 Tax=Stagonospora sp. SRC1lsM3a TaxID=765868 RepID=A0A178AM81_9PLEO	No hit	0	0	1	No hit	0
AF_DN1800_c0_g1	0	0	2.05327	Basidiomycota	NA	UniRef90_A0A0W0FXV3 Uncharacterized protein n=2 Tax=Moniliophthora roreri TaxID=221103 RepID=A0A0W0FXV3_9AGAR	No hit	0	0	1	No hit	0
AF_DN7735_c0_g1	0	0	2.05254	Ascomycota	Cytochrome c peroxidase, mitochondrial	UniRef90_W2RSN7 Peroxidase n=1 Tax=Cyphellophora europaea CBS 101466 TaxID=1220924 RepID=W2RSN7_9EURO	No hit	0	0	1	AA2(119-359)	0
AF_DN101379_c0_g1	0	0	2.05236	Ascomycota	NA	UniRef90_W2S3A0 Cystathionine beta-synthase n=1 Tax=Cyphellophora europaea CBS 101466 TaxID=1220924 RepID=W2S3A0_9EURO	No hit	0	0	1	No hit	0
AF_DN11264_c0_g1	0	0	2.05166	Ascomycota	NA	UniRef90_A0A1Y1YBN0 Uncharacterized protein n=1 Tax=Clohesyomyces aquaticus TaxID=1231657 RepID=A0A1Y1YBN0_9PLEO	No hit	0	0	1	No hit	0
AF_DN66420_c0_g1	0	0	2.05159	Ascomycota	NA	UniRef90_A0A225ATM8 Uncharacterized protein n=1 Tax=Talaromyces atroroseus TaxID=1441469 RepID=A0A225ATM8_9EURO	No hit	0	0	1	No hit	0
AF_DN68079_c0_g1	0	0	2.05132	Ascomycota	Ph domain-containing protein	UniRef90_A0A178B7W7 Uncharacterized protein n=1 Tax=Stagonospora sp. SRC1lsM3a TaxID=765868 RepID=A0A178B7W7_9PLEO	No hit	0	0	1	No hit	0
AF_DN90226_c0_g1	0	0	2.05131	No hit found	NA	No hits	No hit	0	0	1	No hit	0
AF_DN27988_c0_g1	0	0	2.0506	Ascomycota	Cross-pathway control protein A	UniRef90_A0A225AWI0 Uncharacterized protein n=1 Tax=Talaromyces atroroseus TaxID=1441469 RepID=A0A225AWI0_9EURO	No hit	0	0	1	No hit	0
AF_DN73598_c0_g1	0	0	2.05026	Basidiomycota	Polyadenylate-binding protein, cytoplasmic and nuclear	UniRef90_A0A0H2RS62 Polyadenylate-binding protein n=1 Tax=Schizopora paradoxa TaxID=27342 RepID=A0A0H2RS62_9HOMO	No hit	0	0	1	No hit	0
AF_DN69498_c0_g1	0	0	2.04532	Basidiomycota	NA	UniRef90_A0A067TG83 Uncharacterized protein n=1 Tax=Galerina marginata (strain CBS 339.88) TaxID=685588 RepID=A0A067TG83_GALM3	No hit	0	0	1	No hit	0
AF_DN16898_c0_g1	0	0	2.0436	Ascomycota	NA	UniRef90_A0A0N1HWI7 Vacuolar protein sorting-associated protein 1 n=1 Tax=Phialophora attae TaxID=1664694 RepID=A0A0N1HWI7_9EURO	No hit	0	0	1	No hit	0	gnl|TC-DB|P21576|9.A.63.1.1 Vacuolar protein sorting-associated protein 1 OS=Saccharomyces cerevisiae (strain ATCC 204508/ S288c) GN=VPS1 PE=1 SV=2	74.5665
AF_DN36639_c0_g1	0	0.0119317	2.04342	Ascomycota	Vegetative cell wall protein gp1	UniRef90_A0A175VUJ5 Uncharacterized protein n=1 Tax=Madurella mycetomatis TaxID=100816 RepID=A0A175VUJ5_9PEZI	No hit	0	0.0106564	0.999943	No hit	0
AF_DN105836_c0_g1	0	0	2.04301	Basidiomycota	NA	UniRef90_A0A067T969 Uncharacterized protein n=1 Tax=Galerina marginata (strain CBS 339.88) TaxID=685588 RepID=A0A067T969_GALM3	No hit	0	0	1	CBM57(6)	0
AF_DN2669_c0_g1	0	0	2.04218	Ascomycota	NA	No hits	No hit	0	0	1	No hit	0
AF_DN67221_c0_g1	0	0	2.04196	Basidiomycota	NADPH oxidase complex component NoxA	UniRef90_A0A067TY36 Uncharacterized protein n=1 Tax=Galerina marginata (strain CBS 339.88) TaxID=685588 RepID=A0A067TY36_GALM3	No hit	0	0	1	No hit	0	gnl|TC-DB|CCA70369|5.B.1.1.10 probable NADPH oxidase heavy chain subunit [Serendipita indica DSM 11827]	90.5045
AF_DN60163_c0_g1	0	0	2.04174	Ascomycota	Vacuolar import and degradation protein	UniRef90_A0A093VC07 Vacuolar import and degradation protein 27 (Fragment) n=2 Tax=Talaromyces marneffei PM1 TaxID=1077442 RepID=A0A093VC07_TALMA	No hit	0	0	1	No hit	0
AF_DN95996_c0_g1	0	0	2.04103	Basidiomycota	NA	UniRef90_A0A0W0FUA2 Uncharacterized protein n=2 Tax=Moniliophthora roreri TaxID=221103 RepID=A0A0W0FUA2_9AGAR	No hit	0	0	1	No hit	0
AF_DN69855_c0_g1	0	0	2.04098	Basidiomycota	40S ribosomal protein S12	UniRef90_A0A151W4M6 40S ribosomal protein S12 n=55 Tax=Agaricomycetes TaxID=155619 RepID=A0A151W4M6_HYPMA	No hit	0	0	1	No hit	0
AF_DN92456_c0_g1	0	0	2.04012	Ascomycota	NA	UniRef90_A0A1Q5Q8E1 Uncharacterized protein n=1 Tax=Talaromyces atroroseus TaxID=1441469 RepID=A0A1Q5Q8E1_9EURO	No hit	0	0	1	No hit	0
AF_DN70206_c0_g1	0	0	2.03876	Ascomycota	NA	UniRef90_A0A0N0NHP4 Putative mitochondrial carrier n=1 Tax=Phialophora attae TaxID=1664694 RepID=A0A0N0NHP4_9EURO	No hit	0	0	1	No hit	0
AF_DN73398_c0_g1	0	0	2.03768	Ascomycota	NA	UniRef90_A0A1Y1Z1T1 Uncharacterized protein n=1 Tax=Clohesyomyces aquaticus TaxID=1231657 RepID=A0A1Y1Z1T1_9PLEO	No hit	0	0	1	No hit	0
AF_DN60078_c0_g1	0	0	2.03759	Ascomycota	NA	UniRef90_A0A1Y2A9R8 Uncharacterized protein n=1 Tax=Clohesyomyces aquaticus TaxID=1231657 RepID=A0A1Y2A9R8_9PLEO	No hit	0	0	1	No hit	0
AF_DN95973_c0_g1	0	0	2.03744	Ascomycota	NA	No hits	No hit	0	0	1	No hit	0
AF_DN70673_c0_g1	0	0	2.03711	Ascomycota	NA	No hits	No hit	0	0	1	No hit	0
AF_DN74852_c0_g1	0	0	2.03679	Basidiomycota	NA	UniRef90_A0A166EWH2 Uncharacterized protein (Fragment) n=1 Tax=Fibularhizoctonia sp. CBS 109695 TaxID=436010 RepID=A0A166EWH2_9HOMO	No hit	0	0	1	No hit	0
AF_DN93870_c0_g1	0	0	2.03644	Ascomycota	NA	UniRef90_A0A2H3IVL6 Uncharacterized protein n=1 Tax=Penicillium occitanis TaxID=290292 RepID=A0A2H3IVL6_9EURO	No hit	0	0	1	No hit	0
AF_DN88406_c0_g1	0	0	2.03546	Ascomycota	NA	UniRef90_A0A0G2EP42 Putative c6 zinc finger domain protein n=1 Tax=Phaeomoniella chlamydospora TaxID=158046 RepID=A0A0G2EP42_9EURO	No hit	0	0	1	No hit	0
AF_DN66524_c0_g1	0	0	2.03513	Ascomycota	NA	UniRef90_W9WYH7 Uncharacterized protein n=2 Tax=Cladophialophora TaxID=82105 RepID=W9WYH7_9EURO	No hit	0	0	1	No hit	0
AF_DN60185_c0_g1	0	0	2.03491	Ascomycota	NA	UniRef90_A0A0G2ERX3 Putative rna binding protein ligatin n=1 Tax=Phaeomoniella chlamydospora TaxID=158046 RepID=A0A0G2ERX3_9EURO	No hit	0	0	1	No hit	0
AF_DN58904_c0_g1	0	0	2.03431	No hit found	NA	UniRef90_A0A225AKA4 Uncharacterized protein n=1 Tax=Talaromyces atroroseus TaxID=1441469 RepID=A0A225AKA4_9EURO	No hit	0	0	1	No hit	0
AF_DN34333_c0_g1	0	0	2.0336	Ascomycota	NA	UniRef90_A0A163D4W9 Uncharacterized protein n=1 Tax=Didymella rabiei TaxID=5454 RepID=A0A163D4W9_DIDRA	No hit	0	0	1	No hit	0
AF_DN34051_c0_g1	0	0	2.03184	Ascomycota	NA	UniRef90_B8MQI5 Fumarate reductase Osm1, putative n=4 Tax=Eurotiales TaxID=5042 RepID=B8MQI5_TALSN	No hit	0	0	1	No hit	0
AF_DN74420_c0_g1	0	0	2.03147	Ascomycota	NA	UniRef90_A0A225B3J1 Uncharacterized protein n=1 Tax=Talaromyces atroroseus TaxID=1441469 RepID=A0A225B3J1_9EURO	No hit	0	0	1	No hit	0
AF_DN61268_c0_g1	0	0	2.03119	Ascomycota	NA	UniRef90_A0A225AL17 Mitochondrial inner membrane i-AAA protease supercomplex subunit n=1 Tax=Talaromyces atroroseus TaxID=1441469 RepID=A0A225AL17_9EURO	No hit	0	0	1	No hit	0
AF_DN16919_c0_g1	0	0	2.03065	Ascomycota	NA	UniRef90_A0A1Y2A3M9 Uncharacterized protein n=1 Tax=Clohesyomyces aquaticus TaxID=1231657 RepID=A0A1Y2A3M9_9PLEO	No hit	0	0	1	No hit	0
AF_DN101424_c0_g1	0	0	2.03055	Ascomycota	Serine hydroxymethyltransferase	UniRef90_U1GYC4 Uncharacterized protein n=1 Tax=Endocarpon pusillum (strain Z07020 / HMAS-L-300199) TaxID=1263415 RepID=U1GYC4_ENDPU	No hit	0	0	1	No hit	SP(Sec/SPI)
AF_DN892_c0_g1	0	0	2.0293	Other fungi	NA	UniRef90_U9T2E0 Heat shock protein hsp20/hsp26 n=8 Tax=Rhizophagus irregularis TaxID=588596 RepID=U9T2E0_RHIID	ACD	0	0	1	No hit	0
AF_DN102241_c0_g1	0	0	2.02917	Ascomycota	Deubiquitination-protection protein dph1 (Fragment)	UniRef90_B6QAD3 Ubiquitin-like protein DskB, putative n=3 Tax=Eurotiales TaxID=5042 RepID=B6QAD3_TALMQ	No hit	0	0	1	No hit	0
AF_DN97485_c0_g1	0	0	2.0287	Ascomycota	NA	UniRef90_R1EHH9 Putative btb poz-like protein n=5 Tax=Botryosphaeriaceae TaxID=45131 RepID=R1EHH9_BOTPV	No hit	0	0	1	No hit	0
AF_DN60802_c0_g1	0	0	2.0283	Ascomycota	Putative c2h2 transcription factor	UniRef90_A0A1Y1ZTY7 Uncharacterized protein n=1 Tax=Clohesyomyces aquaticus TaxID=1231657 RepID=A0A1Y1ZTY7_9PLEO	No hit	0	0	1	No hit	0
AF_DN65524_c0_g1	0	0	2.02786	Basidiomycota	NA	UniRef90_A0A0W0F1K8 Uncharacterized protein n=2 Tax=Moniliophthora roreri TaxID=221103 RepID=A0A0W0F1K8_9AGAR	No hit	0	0	1	No hit	0
AF_DN26394_c0_g1	0	0	2.02724	Basidiomycota	Thioredoxin	UniRef90_A0A2A9NI19 Thioredoxin n=1 Tax=Amanita thiersii Skay4041 TaxID=703135 RepID=A0A2A9NI19_9AGAR	No hit	0	0	1	No hit	0
AF_DN5505_c0_g1	0	0.0174196	2.02705	Ascomycota	mRNA binding post-transcriptional regulator	UniRef90_A0A1Y1ZZX9 Uncharacterized protein n=1 Tax=Clohesyomyces aquaticus TaxID=1231657 RepID=A0A1Y1ZZX9_9PLEO	No hit	0	0.0155902	0.999878	No hit	0
AF_DN89211_c0_g1	0	0	2.02642	Basidiomycota	Structural constituent of ribosome	UniRef90_A0A0C3CJL2 Uncharacterized protein n=2 Tax=Agaricales TaxID=5338 RepID=A0A0C3CJL2_HEBCY	No hit	0	0	1	No hit	0
AF_DN40389_c1_g1	0	0	2.02619	Ascomycota	NA	UniRef90_A0A1Y2A074 High affinity glucose transporter RGT2 n=1 Tax=Clohesyomyces aquaticus TaxID=1231657 RepID=A0A1Y2A074_9PLEO	No hit	0	0	1	No hit	0	gnl|TC-DB|Q8J0V1|2.A.1.1.57 Monosaccharide transporter - Aspergillus niger.	84.6995
AF_DN14197_c1_g1	0	0	2.02608	Ascomycota	NA	UniRef90_A0A1Q5Q8H4 Uncharacterized protein n=1 Tax=Talaromyces atroroseus TaxID=1441469 RepID=A0A1Q5Q8H4_9EURO	No hit	0	0	1	No hit	0
AF_DN87398_c0_g1	0	0	2.02564	Ascomycota	NA	UniRef90_Q0UN13 Uncharacterized protein n=2 Tax=Pleosporales TaxID=92860 RepID=Q0UN13_PHANO	No hit	0	0	1	No hit	0
AF_DN60395_c0_g1	0	0	2.02527	Ascomycota	NA	UniRef90_A0A178ARS7 Uncharacterized protein n=1 Tax=Stagonospora sp. SRC1lsM3a TaxID=765868 RepID=A0A178ARS7_9PLEO	No hit	0	0	1	No hit	SP(Sec/SPI)
AF_DN79010_c0_g1	0	0	2.02396	Basidiomycota	NA	UniRef90_A0A067T123 Uncharacterized protein n=1 Tax=Galerina marginata (strain CBS 339.88) TaxID=685588 RepID=A0A067T123_GALM3	No hit	0	0	1	No hit	0
AF_DN79458_c0_g1	0	0	2.02237	Ascomycota	Ring finger protein 115 (Fragment)	UniRef90_G2RHG4 Uncharacterized protein n=1 Tax=Thielavia terrestris (strain ATCC 38088 / NRRL 8126) TaxID=578455 RepID=G2RHG4_THITE	No hit	0	0	1	No hit	0
AF_DN103093_c0_g1	0	0	2.02124	Basidiomycota	Glycoside hydrolase	UniRef90_A0A067TC38 Uncharacterized protein n=1 Tax=Galerina marginata (strain CBS 339.88) TaxID=685588 RepID=A0A067TC38_GALM3	No hit	0	0	1	No hit	0
AF_DN74257_c0_g1	0	0.0078957	2.02104	Ascomycota	NA	No hits	No hit	0	0.00711331	0.999975	No hit	0
AF_DN66041_c0_g1	0	0	2.02062	Ascomycota	NA	No hits	No hit	0	0	1	No hit	0
AF_DN96443_c0_g1	0	0	2.02015	Ascomycota	NA	UniRef90_G2R2G1 Uncharacterized protein n=1 Tax=Thielavia terrestris (strain ATCC 38088 / NRRL 8126) TaxID=578455 RepID=G2R2G1_THITE	No hit	0	0	1	No hit	0
AF_DN64651_c0_g1	0	0	2.02001	No hit found	NA	No hits	No hit	0	0	1	No hit	0
AF_DN91048_c0_g1	0	0	2.02	Basidiomycota	NA	UniRef90_A0A165QQ80 Uncharacterized protein n=1 Tax=Exidia glandulosa HHB12029 TaxID=1314781 RepID=A0A165QQ80_EXIGL	No hit	0	0	1	No hit	0
AF_DN25579_c0_g1	0	0	2.01949	Basidiomycota	Copper radical oxidase variant A	UniRef90_A0A165DEC5 DUF1929-domain-containing protein n=1 Tax=Exidia glandulosa HHB12029 TaxID=1314781 RepID=A0A165DEC5_EXIGL	No hit	0	0	1	AA5_1(1-567)	0
AF_DN81586_c0_g1	0	0	2.01833	No hit found	NA	UniRef90_A9CQL6 RNA-directed RNA polymerase n=1 Tax=Alternaria alternata virus 1 TaxID=483537 RepID=A9CQL6_9VIRU	No hit	0	0	1	No hit	0
AF_DN65554_c0_g1	0	0	2.01813	Ascomycota	NA	UniRef90_A0A0U1M044 Uncharacterized protein n=1 Tax=Talaromyces islandicus TaxID=28573 RepID=A0A0U1M044_TALIS	No hit	0	0	1	No hit	0
AF_DN61227_c0_g1	0	0	2.01808	Ascomycota	NA	UniRef90_C5PGW2 Phosphoenolpyruvate carboxykinase, putative n=6 Tax=Coccidioides TaxID=5500 RepID=C5PGW2_COCP7	No hit	0	0	1	No hit	0
AF_DN12804_c0_g1	0	0	2.0171	Ascomycota	DnaJ domain-containing protein	UniRef90_A0A1Q5Q8F6 Uncharacterized protein n=1 Tax=Talaromyces atroroseus TaxID=1441469 RepID=A0A1Q5Q8F6_9EURO	No hit	0	0	1	No hit	0
AF_DN57414_c0_g1	0	0	2.01708	Ascomycota	NA	UniRef90_A0A163D2D0 Translation elongation factor n=1 Tax=Didymella rabiei TaxID=5454 RepID=A0A163D2D0_DIDRA	No hit	0	0	1	No hit	0
AF_DN95237_c0_g1	0	0	2.01629	Ascomycota	NA	UniRef90_A0A225AX93 Uncharacterized protein n=1 Tax=Talaromyces atroroseus TaxID=1441469 RepID=A0A225AX93_9EURO	No hit	0	0	1	No hit	0
AF_DN67467_c0_g1	0	0	2.01614	Ascomycota	NA	UniRef90_A0A0N1P0P0 Plasma membrane fusion protein prm1 n=1 Tax=Phialophora attae TaxID=1664694 RepID=A0A0N1P0P0_9EURO	No hit	0	0	1	No hit	SP(Sec/SPI)
AF_DN66481_c0_g1	0	0	2.01605	Ascomycota	NA	UniRef90_A0A0D2FWA7 Potassium uptake protein n=1 Tax=Phialophora americana TaxID=5601 RepID=A0A0D2FWA7_9EURO	No hit	0	0	1	No hit	0
AF_DN87067_c0_g1	0	0	2.01532	Basidiomycota	NA	No hits	No hit	0	0	1	No hit	0
AF_DN93880_c0_g1	0	0	2.01359	No hit found	NA	No hits	No hit	0	0	1	No hit	0
AF_DN24750_c0_g1	0	0	2.01326	Basidiomycota	Cupredoxin	UniRef90_A0A067TYP9 Uncharacterized protein n=1 Tax=Galerina marginata (strain CBS 339.88) TaxID=685588 RepID=A0A067TYP9_GALM3	No hit	0	0	1	No hit	SP(Sec/SPI)
AF_DN93711_c0_g1	0	0.00585157	2.01247	Ascomycota	NA	UniRef90_A0A084RI16 Uncharacterized protein n=3 Tax=Stachybotrys TaxID=74721 RepID=A0A084RI16_STACH	No hit	0	0.00529075	0.999986	No hit	0
AF_DN73772_c0_g1	0	0.00985447	2.01204	Ascomycota	Zinc finger CCCH domain-containing protein 14	UniRef90_A0A225APR2 Uncharacterized protein n=1 Tax=Talaromyces atroroseus TaxID=1441469 RepID=A0A225APR2_9EURO	No hit	0	0.00889323	0.99996	No hit	0
AF_DN74436_c0_g1	0	0	2.01179	Ascomycota	NA	UniRef90_A0A0G2EQT5 Putative abc bile acid transporter n=1 Tax=Phaeomoniella chlamydospora TaxID=158046 RepID=A0A0G2EQT5_9EURO	No hit	0	0	1	No hit	0
AF_DN75757_c0_g1	0	0.0252135	2.00997	Ascomycota	Rab1b in complex with the Gef domain of DrraSIDM FROM legionella	UniRef90_A0A0H2RQQ1 GTP-binding protein ypt1 n=1 Tax=Schizopora paradoxa TaxID=27342 RepID=A0A0H2RQQ1_9HOMO	No hit	0	0.0225918	0.999745	No hit	0
AF_DN33421_c0_g1	0	0.0186725	2.00904	Ascomycota	LON peptidase N-terminal domain and RING finger protein 3	UniRef90_A0A2H3J0Z0 Uncharacterized protein n=1 Tax=Penicillium occitanis TaxID=290292 RepID=A0A2H3J0Z0_9EURO	No hit	0	0.0167913	0.999859	No hit	0
AF_DN56368_c0_g1	0	0	2.0086	Ascomycota	NA	UniRef90_B2WMI7 Acyl-CoA desaturase n=1 Tax=Pyrenophora tritici-repentis (strain Pt-1C-BFP) TaxID=426418 RepID=B2WMI7_PYRTR	No hit	0	0	1	No hit	0
AF_DN98762_c0_g1	0	0	2.00784	Ascomycota	NA	UniRef90_A0A1Q5QC03 Uncharacterized protein n=1 Tax=Talaromyces atroroseus TaxID=1441469 RepID=A0A1Q5QC03_9EURO	No hit	0	0	1	No hit	0	gnl|TC-DB|Q8J0U9|2.A.1.1.58 Monosaccharide transporter - Aspergillus niger.	71.6535
AF_DN85591_c0_g1	0	0	2.00727	Ascomycota	NA	UniRef90_A0A178EG55 Uncharacterized protein n=1 Tax=Pyrenochaeta sp. DS3sAY3a TaxID=765867 RepID=A0A178EG55_9PLEO	No hit	0	0	1	No hit	0
AF_DN84868_c0_g1	0	0.0303437	2.00672	Ascomycota	Thiazole biosynthetic enzyme	UniRef90_W2S1H4 Thiamine thiazole synthase n=1 Tax=Cyphellophora europaea CBS 101466 TaxID=1220924 RepID=W2S1H4_9EURO	No hit	0	0.027144	0.999632	No hit	0
AF_DN21609_c0_g1	0	0	2.00623	Ascomycota	NA	UniRef90_H6BMC4 Uncharacterized protein n=1 Tax=Exophiala dermatitidis (strain ATCC 34100 / CBS 525.76 / NIH/UT8656) TaxID=858893 RepID=H6BMC4_EXODN	No hit	0	0	1	No hit	0
AF_DN94483_c0_g1	0	0	2.00556	Ascomycota	NA	UniRef90_B8MC63 Eukaryotic translation initiation factor 3 subunit G n=7 Tax=Eurotiales TaxID=5042 RepID=B8MC63_TALSN	No hit	0	0	1	No hit	0
AF_DN88624_c0_g1	0	0	2.00512	Ascomycota	Isocitrate lyase	UniRef90_A0A1C1CGW7 Isocitrate lyase n=15 Tax=Herpotrichiellaceae TaxID=43219 RepID=A0A1C1CGW7_9EURO	No hit	0	0	1	No hit	0
AF_DN69596_c0_g1	0	0	2.00508	Ascomycota	NA	UniRef90_E4ZXC5 Similar to fumarate reductase n=13 Tax=Pleosporales TaxID=92860 RepID=E4ZXC5_LEPMJ	No hit	0	0	1	No hit	0
AF_DN94352_c0_g1	0	0	2.00383	Ascomycota	NA	UniRef90_W2RZM0 Uncharacterized protein n=1 Tax=Cyphellophora europaea CBS 101466 TaxID=1220924 RepID=W2RZM0_9EURO	No hit	0	0	1	GT71(1-123)	0
AF_DN2914_c0_g1	0	0	2.00381	Ascomycota	NA	UniRef90_A0A0G2E1G4 Uncharacterized protein n=1 Tax=Phaeomoniella chlamydospora TaxID=158046 RepID=A0A0G2E1G4_9EURO	No hit	0	0	1	No hit	0
AF_DN54621_c0_g1	0	0	2.00066	Ascomycota	Non-histone chromosomal protein 6	UniRef90_R1GGN3 Putative nucleosome binding protein n=4 Tax=Botryosphaeriaceae TaxID=45131 RepID=R1GGN3_BOTPV	No hit	0	0	1	No hit	0
AF_DN74639_c0_g1	0	0.0101669	1.99874	Ascomycota	Regulation of cyclin-dependent protein serine/threonine kinase	UniRef90_A0A177CZI6 Cyclin n=1 Tax=Paraphaeosphaeria sporulosa TaxID=1460663 RepID=A0A177CZI6_9PLEO	No hit	0	0.00921069	0.999958	No hit	0
AF_DN102295_c0_g1	0	0	1.99816	Basidiomycota	Ribosomal protein S3Ae	UniRef90_Q764D2 40S ribosomal protein S1 n=48 Tax=Agaricomycetes TaxID=155619 RepID=RS3A_LENED	No hit	0	0	1	No hit	0
AF_DN59368_c0_g1	0	0	1.99785	Ascomycota	NA	UniRef90_B8MBN4 Cytosolic Fe-S cluster assembly factor NBP35 n=5 Tax=Eurotiales TaxID=5042 RepID=B8MBN4_TALSN	No hit	0	0	1	No hit	0
AF_DN104177_c0_g1	0	0	1.99743	Basidiomycota	60S acidic ribosomal protein P0	UniRef90_A0A165QIZ8 60S acidic ribosomal protein P0 n=1 Tax=Exidia glandulosa HHB12029 TaxID=1314781 RepID=A0A165QIZ8_EXIGL	No hit	0	0	1	No hit	0
AF_DN82238_c0_g1	0.084227	0.064955	1.99707	Ascomycota	NA	UniRef90_G2QF81 Uncharacterized protein n=1 Tax=Myceliophthora thermophila (strain ATCC 42464 / BCRC 31852 / DSM 1799) TaxID=573729 RepID=G2QF81_MYCTT	No hit	0.0733552	0.0570864	0.995671	No hit	0
AF_DN83124_c0_g1	0	0	1.99675	Ascomycota	NA	UniRef90_W2S6U9 Uncharacterized protein n=1 Tax=Cyphellophora europaea CBS 101466 TaxID=1220924 RepID=W2S6U9_9EURO	No hit	0	0	1	No hit	SP(Sec/SPI)
AF_DN39124_c0_g1	0.0180312	0	1.99661	Ascomycota	NA	UniRef90_W2S3H3 ATP-dependent RNA helicase dbp2 n=1 Tax=Cyphellophora europaea CBS 101466 TaxID=1220924 RepID=W2S3H3_9EURO	No hit	0.016281	0	0.999867	No hit	0
AF_DN100332_c0_g1	0	0	1.99529	Ascomycota	NA	UniRef90_W2RQ89 Uncharacterized protein n=1 Tax=Cyphellophora europaea CBS 101466 TaxID=1220924 RepID=W2RQ89_9EURO	No hit	0	0	1	No hit	0
AF_DN95355_c0_g1	0	0	1.99527	Ascomycota	NA	UniRef90_A0A074WVT0 p-loop containing nucleoside triphosphate hydrolase protein n=4 Tax=Aureobasidium TaxID=5579 RepID=A0A074WVT0_9PEZI	No hit	0	0	1	No hit	0	gnl|TC-DB|B0Y3B6|3.A.1.201.10 ABC multidrug transporter Mdr1 OS=Aspergillus fumigatus (strain CEA10 / CBS 144.89 / FGSC A1163)GN=AFUB_053630 PE=4 SV=1	91.1504
AF_DN8900_c0_g1	0	0	1.99515	Ascomycota	Btb poz domain-containing protein	UniRef90_A0A162WHT3 Uncharacterized protein n=1 Tax=Didymella rabiei TaxID=5454 RepID=A0A162WHT3_DIDRA	No hit	0	0	1	No hit	0
AF_DN101264_c0_g1	0	0	1.99372	Ascomycota	Elongation factor 3	UniRef90_A0A163EL83 ATPase n=2 Tax=Didymellaceae TaxID=683158 RepID=A0A163EL83_DIDRA	No hit	0	0	1	No hit	0
AF_DN77293_c0_g1	0	0	1.99314	No hit found	NA	UniRef90_A0A1Q1N6L9 Replicase n=1 Tax=Agaricus bisporus virus 6 TaxID=1945750 RepID=A0A1Q1N6L9_9VIRU	No hit	0	0	1	No hit	0
AF_DN88746_c0_g1	0	0	1.99297	Ascomycota	NA	UniRef90_G3Y093 Uncharacterized protein (Fragment) n=1 Tax=Aspergillus niger (strain ATCC 1015 / CBS 113.46 / FGSC A1144/ LSHB Ac4 / NCTC 3858a / NRRL 328 / USDA 3528.7) TaxID=380704 RepID=G3Y093_ASPNA	No hit	0	0	1	No hit	0
AF_DN74294_c0_g1	0	0	1.99231	Ascomycota	NA	UniRef90_A0A1C1CIC7 Mitochondrial protein import protein mas5 n=20 Tax=Herpotrichiellaceae TaxID=43219 RepID=A0A1C1CIC7_9EURO	DnaJ	0	0	1	No hit	0
AF_DN90794_c0_g1	0	0	1.9922	Ascomycota	NA	UniRef90_A0A177BWF9 Kinase-like protein n=1 Tax=Paraphaeosphaeria sporulosa TaxID=1460663 RepID=A0A177BWF9_9PLEO	No hit	0	0	1	No hit	0
AF_DN80854_c0_g1	0	0	1.99162	Ascomycota	NA	UniRef90_A0A225ABP6 Uncharacterized protein n=1 Tax=Talaromyces atroroseus TaxID=1441469 RepID=A0A225ABP6_9EURO	No hit	0	0	1	No hit	0
AF_DN10245_c0_g1	0	0	1.99161	Ascomycota	NADP-dependent oxidoreductase domain	UniRef90_A0A225AN93 Uncharacterized protein n=1 Tax=Talaromyces atroroseus TaxID=1441469 RepID=A0A225AN93_9EURO	No hit	0	0	1	No hit	0
AF_DN76387_c0_g1	0	0	1.99143	Basidiomycota	NA	UniRef90_A0A0C3CZ99 Uncharacterized protein n=1 Tax=Hebeloma cylindrosporum h7 TaxID=686832 RepID=A0A0C3CZ99_HEBCY	No hit	0	0	1	No hit	0
AF_DN86326_c0_g1	0	0	1.99135	Ascomycota	NA	No hits	No hit	0	0	1	No hit	0
AF_DN65522_c0_g1	0	0	1.99116	Basidiomycota	NA	UniRef90_B0DA55 60S acidic ribosomal protein P0 n=3 Tax=Agaricales TaxID=5338 RepID=B0DA55_LACBS	No hit	0	0	1	No hit	0
AF_DN93263_c0_g1	0	0	1.99074	Ascomycota	NA	UniRef90_A0A225ADM8 Uncharacterized protein n=1 Tax=Talaromyces atroroseus TaxID=1441469 RepID=A0A225ADM8_9EURO	No hit	0	0	1	No hit	0
AF_DN89813_c0_g1	0	0	1.99049	Ascomycota	NA	UniRef90_F8QX20 Mitochondrial heat shock protein SSC1 n=1 Tax=Endocarpon pusillum TaxID=364733 RepID=F8QX20_9EURO	Hsp70	0	0	1	No hit	0
AF_DN89724_c0_g1	0	0	1.9899	Ascomycota	NA	UniRef90_A0A2H3IP50 Acyl transferase/acyl hydrolase/lysophospholipase n=1 Tax=Penicillium occitanis TaxID=290292 RepID=A0A2H3IP50_9EURO	No hit	0	0	1	No hit	0
AF_DN71284_c0_g1	0	0.0546933	1.98867	Basidiomycota	NA	UniRef90_A0A0H5REM1 Uncharacterized protein (Fragment) n=1 Tax=Spongospora subterranea TaxID=70186 RepID=A0A0H5REM1_9EUKA	No hit	0	0.0485803	0.998819	No hit	0
AF_DN56484_c0_g1	0	0	1.98824	Ascomycota	Phosphatidylglycerol phosphatidylinositol transfer protein	UniRef90_A0A0G2EP65 Putative phosphatidylglycerol phosphatidylinositol transfer protein n=1 Tax=Phaeomoniella chlamydospora TaxID=158046 RepID=A0A0G2EP65_9EURO	No hit	0	0	1	No hit	SP(Sec/SPI)
AF_DN13883_c0_g1	0	0	1.98818	Ascomycota	Zinc finger transcription factor ace1	UniRef90_W2S6N9 Uncharacterized protein n=1 Tax=Cyphellophora europaea CBS 101466 TaxID=1220924 RepID=W2S6N9_9EURO	No hit	0	0	1	No hit	0
AF_DN87115_c0_g1	0	0	1.98614	Ascomycota	NA	No hits	No hit	0	0	1	No hit	0
AF_DN55385_c0_g1	0	0	1.98466	Basidiomycota	Transmembrane GTPase	UniRef90_A0A165DZP7 Uncharacterized protein n=1 Tax=Exidia glandulosa HHB12029 TaxID=1314781 RepID=A0A165DZP7_EXIGL	No hit	0	0	1	No hit	0
AF_DN74381_c0_g1	0	0	1.98344	Ascomycota	NA	UniRef90_A0A225AKR4 Uncharacterized protein n=1 Tax=Talaromyces atroroseus TaxID=1441469 RepID=A0A225AKR4_9EURO	No hit	0	0	1	No hit	0
AF_DN92733_c0_g1	0	0	1.9829	Ascomycota	NA	UniRef90_A0A177CCA7 Uncharacterized protein n=1 Tax=Paraphaeosphaeria sporulosa TaxID=1460663 RepID=A0A177CCA7_9PLEO	No hit	0	0	1	No hit	0
AF_DN36942_c0_g1	0	0	1.98194	Other fungi	NA	No hits	No hit	0	0	1	No hit	0
AF_DN89289_c0_g1	0	0	1.98129	Ascomycota	NA	No hits	No hit	0	0	1	No hit	0
AF_DN96740_c0_g1	0	0	1.98	Basidiomycota	NA	No hits	No hit	0	0	1	No hit	0
AF_DN16508_c0_g1	0	0	1.97975	Basidiomycota	Serine hydroxymethyltransferase (Fragment)	UniRef90_A0A165JJ52 Serine hydroxymethyltransferase (Fragment) n=1 Tax=Exidia glandulosa HHB12029 TaxID=1314781 RepID=A0A165JJ52_EXIGL	No hit	0	0	1	No hit	0
AF_DN77774_c0_g1	0	0.0491997	1.97831	Ascomycota	NA	No hits	No hit	0	0.0439648	0.999033	No hit	0
AF_DN83026_c0_g1	0	0	1.97757	Ascomycota	Replication factor-A C terminal domain	UniRef90_W2RTG1 Replication protein A subunit n=1 Tax=Cyphellophora europaea CBS 101466 TaxID=1220924 RepID=W2RTG1_9EURO	No hit	0	0	1	No hit	0
AF_DN55459_c0_g1	0	0	1.97721	Ascomycota	NA	UniRef90_C4XYD4 40S ribosomal protein S3aE n=1 Tax=Clavispora lusitaniae (strain ATCC 42720) TaxID=306902 RepID=C4XYD4_CLAL4	No hit	0	0	1	No hit	0
AF_DN107763_c0_g1	0	0	1.97602	Basidiomycota	Heat shock protein 16	UniRef90_G3XKT9 Small heat shock protein n=1 Tax=Pholiota nameko TaxID=61267 RepID=G3XKT9_PHONA	ACD	0	0	1	No hit	0
AF_DN93529_c0_g1	0.0251424	0	1.97552	Ascomycota	S-adenosylmethionine synthetase	UniRef90_C4JQQ3 S-adenosylmethionine synthase n=21 Tax=Onygenales TaxID=33183 RepID=C4JQQ3_UNCRE	No hit	0.0227666	0	0.999741	No hit	0
AF_DN85874_c0_g1	0	0	1.97516	Ascomycota	NA	UniRef90_A0A0U1M5Z7 CCR4-NOT transcription complex subunit 4 n=1 Tax=Talaromyces islandicus TaxID=28573 RepID=A0A0U1M5Z7_TALIS	No hit	0	0	1	No hit	0
AF_DN72271_c0_g1	0	0	1.97513	Basidiomycota	NA	UniRef90_E2LF87 Uncharacterized protein (Fragment) n=1 Tax=Moniliophthora perniciosa (strain FA553 / isolate CP02) TaxID=554373 RepID=E2LF87_MONPE	No hit	0	0	1	No hit	0
AF_DN86215_c0_g1	0	0	1.97502	Ascomycota	NA	UniRef90_A0A1Q5Q8E7 Uncharacterized protein n=1 Tax=Talaromyces atroroseus TaxID=1441469 RepID=A0A1Q5Q8E7_9EURO	No hit	0	0	1	No hit	0
AF_DN101665_c0_g1	0	0	1.97481	Basidiomycota	NA	No hits	No hit	0	0	1	No hit	0
AF_DN86953_c0_g1	0	0	1.97279	Ascomycota	Putative Thiamine thiazole synthase	UniRef90_W2S1H4 Thiamine thiazole synthase n=1 Tax=Cyphellophora europaea CBS 101466 TaxID=1220924 RepID=W2S1H4_9EURO	No hit	0	0	1	No hit	0
AF_DN59222_c0_g1	0	0	1.97001	Ascomycota	DNA nickase	UniRef90_A0A067M6U0 Uncharacterized protein n=1 Tax=Botryobasidium botryosum FD-172 SS1 TaxID=930990 RepID=A0A067M6U0_9HOMO	No hit	0	0	1	No hit	0
AF_DN77969_c0_g1	0	0	1.96952	Ascomycota	NA	UniRef90_K2RNQ5 Phosphoenolpyruvate carboxykinase n=3 Tax=Botryosphaeriaceae TaxID=45131 RepID=K2RNQ5_MACPH	No hit	0	0	1	No hit	0
AF_DN67832_c0_g1	0	0	1.96891	Ascomycota	NA	UniRef90_A0A0U1M044 Uncharacterized protein n=1 Tax=Talaromyces islandicus TaxID=28573 RepID=A0A0U1M044_TALIS	No hit	0	0	1	No hit	0
AF_DN93919_c0_g1	0	0	1.96849	Ascomycota	Non-viral sialidase	UniRef90_A0A225ABQ1 Uncharacterized protein n=1 Tax=Talaromyces atroroseus TaxID=1441469 RepID=A0A225ABQ1_9EURO	No hit	0	0	1	GH93(149-418)	0
AF_DN18965_c0_g1	0	0	1.96811	Basidiomycota	NA	No hits	No hit	0	0	1	No hit	0
AF_DN10910_c0_g1	0	0	1.9674	Basidiomycota	NA	UniRef90_A0A0H2RM56 Acid protease n=1 Tax=Schizopora paradoxa TaxID=27342 RepID=A0A0H2RM56_9HOMO	No hit	0	0	1	No hit	0
AF_DN60420_c0_g1	0	0	1.96722	Ascomycota	NA	UniRef90_W2S660 Uncharacterized protein n=1 Tax=Cyphellophora europaea CBS 101466 TaxID=1220924 RepID=W2S660_9EURO	No hit	0	0	1	No hit	0
AF_DN34811_c2_g1	0	0	1.96675	Ascomycota	Elongation factor 2 (Fragment)	UniRef90_Q0UQC6 Uncharacterized protein n=12 Tax=Pleosporineae TaxID=715340 RepID=Q0UQC6_PHANO	No hit	0	0	1	No hit	0
AF_DN8458_c0_g1	0	0	1.96556	Basidiomycota	NA	UniRef90_A0A067T8C8 Uncharacterized protein n=1 Tax=Galerina marginata (strain CBS 339.88) TaxID=685588 RepID=A0A067T8C8_GALM3	No hit	0	0	1	No hit	0
AF_DN16270_c0_g1	0	0	1.96462	Basidiomycota	Arabinan endo--alpha-l-arabinosidase	UniRef90_A0A067THN0 Uncharacterized protein (Fragment) n=1 Tax=Galerina marginata (strain CBS 339.88) TaxID=685588 RepID=A0A067THN0_GALM3	No hit	0	0	1	GH43_5(28-304)	SP(Sec/SPI)
AF_DN76015_c0_g1	0	0	1.96398	Ascomycota	NA	UniRef90_A0A1Y1ZBS0 Fungal-specific transcription factor domain-domain-containing protein n=1 Tax=Clohesyomyces aquaticus TaxID=1231657 RepID=A0A1Y1ZBS0_9PLEO	No hit	0	0	1	No hit	0
AF_DN103662_c0_g1	0	0	1.96386	Ascomycota	O-methyltransferase FtmD	UniRef90_A0A072PR95 Uncharacterized protein n=1 Tax=Exophiala aquamarina CBS 119918 TaxID=1182545 RepID=A0A072PR95_9EURO	No hit	0	0	1	No hit	0
AF_DN63028_c0_g1	0	0.27619	1.96382	No hit found	NA	UniRef90_A0A177CZW7 Uncharacterized protein n=1 Tax=Paraphaeosphaeria sporulosa TaxID=1460663 RepID=A0A177CZW7_9PLEO	No hit	0	0.219018	0.975721	No hit	0
AF_DN93366_c0_g1	0	0.105767	1.9635	Ascomycota	Conidiation-specific protein con-10	UniRef90_A0A084RW90 Uncharacterized protein n=2 Tax=Stachybotrys chartarum TaxID=74722 RepID=A0A084RW90_STACH	No hit	0	0.0921518	0.995745	No hit	0
AF_DN66199_c0_g1	0	0	1.96315	Ascomycota	NA	UniRef90_A0A0N1H3A7 Heat shock 70 kDa protein n=2 Tax=Chaetothyriales TaxID=34395 RepID=A0A0N1H3A7_9EURO	Hsp70	0	0	1	No hit	0	gnl|TC-DB|P10591|3.A.16.1.6 Heat shock protein SSA1 OS=Saccharomyces cerevisiae (strain ATCC 204508 / S288c) OX=559292 GN=SSA1 PE=1 SV=4	87.1212
AF_DN83413_c0_g1	0	0	1.96307	Ascomycota	Metal ion transmembrane transporter	UniRef90_W2RYC5 Uncharacterized protein n=1 Tax=Cyphellophora europaea CBS 101466 TaxID=1220924 RepID=W2RYC5_9EURO	No hit	0	0	1	No hit	0
AF_DN4937_c0_g1	0	0	1.96294	Basidiomycota	NA	UniRef90_A0A067THL3 NADPH--cytochrome P450 reductase n=2 Tax=Agaricales TaxID=5338 RepID=A0A067THL3_GALM3	No hit	0	0	1	No hit	0
AF_DN70219_c0_g1	0	0	1.9627	Ascomycota	NA	UniRef90_A0A1Q5Q996 Uncharacterized protein n=1 Tax=Talaromyces atroroseus TaxID=1441469 RepID=A0A1Q5Q996_9EURO	No hit	0	0	1	No hit	0
AF_DN103818_c0_g1	0	0	1.96152	Ascomycota	NA	UniRef90_K2RDD9 Heat shock protein Hsp20 n=1 Tax=Macrophomina phaseolina (strain MS6) TaxID=1126212 RepID=K2RDD9_MACPH	No hit	0	0	1	No hit	0
AF_DN21149_c0_g1	0	0	1.96086	Ascomycota	O-sialoglycoprotein endopeptidase	UniRef90_A0A225ADS3 Uncharacterized protein n=1 Tax=Talaromyces atroroseus TaxID=1441469 RepID=A0A225ADS3_9EURO	No hit	0	0	1	No hit	0
AF_DN64852_c0_g1	0	0	1.96017	Basidiomycota	NA	UniRef90_K5X709 Uncharacterized protein n=2 Tax=Agaricus bisporus TaxID=5341 RepID=K5X709_AGABU	No hit	0	0	1	No hit	0
AF_DN26328_c0_g1	0	0	1.95926	Basidiomycota	NA	UniRef90_A0A067TPS1 Uncharacterized protein n=1 Tax=Galerina marginata (strain CBS 339.88) TaxID=685588 RepID=A0A067TPS1_GALM3	No hit	0	0	1	No hit	0
AF_DN86966_c0_g1	0	0	1.95922	Ascomycota	Rhodopsin bacterial	UniRef90_Q9HGT7 Opsin n=2 Tax=Leptosphaeria maculans TaxID=5022 RepID=Q9HGT7_LEPMC	No hit	0	0	1	No hit	0	gnl|TC-DB|Q9HGT7|3.E.1.4.3 Opsin - Leptosphaeria maculans (Blackleg fungus).	72.1408
AF_DN12890_c0_g1	0	0	1.95909	Ascomycota	AN1-type zinc finger protein TMC1	UniRef90_A0A175VR60 AN1-type zinc finger protein TMC1 n=1 Tax=Madurella mycetomatis TaxID=100816 RepID=A0A175VR60_9PEZI	No hit	0	0	1	No hit	0
AF_DN63267_c0_g1	0	0	1.95883	Ascomycota	NA	UniRef90_E5AAL5 Uncharacterized protein n=1 Tax=Leptosphaeria maculans (strain JN3 / isolate v23.1.3 / race Av1-4-5-6-7-8)TaxID=985895 RepID=E5AAL5_LEPMJ	No hit	0	0	1	No hit	0
AF_DN97411_c0_g1	0	0	1.95855	Ascomycota	NA	UniRef90_A0A0D1YK58 Uncharacterized protein n=1 Tax=Exophiala sideris TaxID=1016849 RepID=A0A0D1YK58_9EURO	No hit	0	0	1	No hit	0
AF_DN98808_c0_g1	0	0	1.95674	Ascomycota	NA	UniRef90_R7YS70 Fatty acid synthase subunit alpha n=1 Tax=Coniosporium apollinis (strain CBS 100218) TaxID=1168221 RepID=R7YS70_CONA1	No hit	0	0	1	No hit	0
AF_DN88964_c0_g1	0	0	1.95585	Ascomycota	NA	UniRef90_A0A177CKE0 Regulator of G protein signaling superfamily n=1 Tax=Paraphaeosphaeria sporulosa TaxID=1460663 RepID=A0A177CKE0_9PLEO	No hit	0	0	1	No hit	0
AF_DN16110_c0_g1	0	0	1.95573	Basidiomycota	Glycoside hydrolase family 23 protein	UniRef90_A0A0C3BFT6 Glycoside hydrolase family 23 protein (Fragment) n=1 Tax=Serendipita vermifera MAFF 305830 TaxID=933852 RepID=A0A0C3BFT6_9HOMO	No hit	0	0	1	No hit	0
AF_DN77395_c0_g1	0	0	1.95545	Asco or Basidio	NA	No hits	No hit	0	0	1	No hit	0
AF_DN15123_c0_g1	0	0	1.95541	Basidiomycota	Large subunit ribosomal protein L24e	UniRef90_A8NMP9 60S ribosomal protein L24 n=1 Tax=Coprinopsis cinerea (strain Okayama-7 / 130 / ATCC MYA-4618 / FGSC 9003)TaxID=240176 RepID=A8NMP9_COPC7	No hit	0	0	1	No hit	0
AF_DN83323_c0_g1	0	0.04332	1.95468	Asco or Basidio	NA	UniRef90_J0WWM7 MFS general substrate transporter n=1 Tax=Auricularia subglabra (strain TFB-10046 / SS5) TaxID=717982 RepID=J0WWM7_AURST	No hit	0	0.0391137	0.999235	No hit	0
AF_DN84062_c0_g1	0	0	1.95451	Ascomycota	NA	UniRef90_A0A1Q5QAS5 Uncharacterized protein n=1 Tax=Talaromyces atroroseus TaxID=1441469 RepID=A0A1Q5QAS5_9EURO	No hit	0	0	1	No hit	0
AF_DN65335_c0_g1	0	0	1.9544	No hit found	NA	No hits	No hit	0	0	1	No hit	0
AF_DN57432_c0_g1	0	0	1.95415	No hit found	NA	No hits	No hit	0	0	1	No hit	0
AF_DN59437_c0_g1	0	0	1.95394	Ascomycota	NA	UniRef90_A0A1Y2LQD3 Uncharacterized protein n=1 Tax=Epicoccum nigrum TaxID=105696 RepID=A0A1Y2LQD3_EPING	No hit	0	0	1	No hit	0
AF_DN19163_c0_g1	0	0	1.95357	Ascomycota	NA	UniRef90_K2S0C4 Amino acid/polyamine transporter I n=1 Tax=Macrophomina phaseolina (strain MS6) TaxID=1126212 RepID=K2S0C4_MACPH	No hit	0	0	1	No hit	0
AF_DN58561_c0_g1	0	0	1.95295	Basidiomycota	NA	UniRef90_A0A0H2RJP7 Glycosyltransferase family 2 protein n=1 Tax=Schizopora paradoxa TaxID=27342 RepID=A0A0H2RJP7_9HOMO	No hit	0	0	1	No hit	0
AF_DN76082_c0_g1	0	0	1.95229	Ascomycota	Ribosomal protein S1	UniRef90_A0A094ADV1 Uncharacterized protein n=24 Tax=Pezizomycotina TaxID=147538 RepID=A0A094ADV1_9PEZI	No hit	0	0	1	No hit	0
AF_DN108651_c0_g1	0	0	1.95162	Ascomycota	NA	No hits	No hit	0	0	1	No hit	0
AF_DN105822_c0_g1	0	0	1.95002	No hit found	NA	UniRef90_A0A0H2RMV2 Uncharacterized protein n=1 Tax=Schizopora paradoxa TaxID=27342 RepID=A0A0H2RMV2_9HOMO	No hit	0	0	1	No hit	0
AF_DN87404_c0_g1	0	0	1.94893	No hit found	NA	UniRef90_A0A165B5I8 DUF602-domain-containing protein n=1 Tax=Exidia glandulosa HHB12029 TaxID=1314781 RepID=A0A165B5I8_EXIGL	No hit	0	0	1	No hit	0
AF_DN74784_c0_g1	0	0	1.94868	Ascomycota	NA	UniRef90_A0A1Y1ZJX3 Kinase-like domain-containing protein n=1 Tax=Clohesyomyces aquaticus TaxID=1231657 RepID=A0A1Y1ZJX3_9PLEO	No hit	0	0	1	No hit	0
AF_DN69318_c0_g1	0	0	1.94696	Ascomycota	NA	UniRef90_R7YY51 Uncharacterized protein n=1 Tax=Coniosporium apollinis (strain CBS 100218) TaxID=1168221 RepID=R7YY51_CONA1	No hit	0	0	1	No hit	0
AF_DN5387_c0_g1	0.0143325	0	1.94597	Ascomycota	NA	UniRef90_W2RZV0 Uncharacterized protein n=1 Tax=Cyphellophora europaea CBS 101466 TaxID=1220924 RepID=W2RZV0_9EURO	No hit	0.0131702	0	0.999913	No hit	0
AF_DN13292_c0_g1	0	0	1.94503	Basidiomycota	NA	UniRef90_G4T6P9 Uncharacterized protein n=1 Tax=Serendipita indica (strain DSM 11827) TaxID=1109443 RepID=G4T6P9_SERID	No hit	0	0	1	No hit	0
AF_DN93707_c0_g1	0	0	1.94414	Ascomycota	Amino acid permease	UniRef90_A0A0G2FF62 Putative amino-acid permease inda1 n=2 Tax=Diaporthe TaxID=36922 RepID=A0A0G2FF62_9PEZI	No hit	0	0	1	No hit	0
AF_DN78426_c0_g1	0	0	1.94285	Ascomycota	NA	UniRef90_A0A1C1C936 Deoxyhypusine hydroxylase n=4 Tax=Herpotrichiellaceae TaxID=43219 RepID=A0A1C1C936_9EURO	No hit	0	0	1	No hit	0
AF_DN87032_c0_g1	0	0	1.94254	Basidiomycota	MFS general substrate transporter	UniRef90_A0A067TMV3 Uncharacterized protein n=1 Tax=Galerina marginata (strain CBS 339.88) TaxID=685588 RepID=A0A067TMV3_GALM3	No hit	0	0	1	No hit	0
AF_DN64441_c0_g1	0	0	1.94178	Ascomycota	NA	UniRef90_A0A1Y1ZF07 Uncharacterized protein n=1 Tax=Clohesyomyces aquaticus TaxID=1231657 RepID=A0A1Y1ZF07_9PLEO	No hit	0	0	1	No hit	0
AF_DN59631_c0_g1	0	0	1.94167	Ascomycota	NA	UniRef90_A0A1Y2M648 Uncharacterized protein n=1 Tax=Epicoccum nigrum TaxID=105696 RepID=A0A1Y2M648_EPING	No hit	0	0	1	No hit	0
AF_DN78491_c0_g1	0	0	1.94123	Basidiomycota	NA	UniRef90_A0A0D2QC09 Uncharacterized protein n=3 Tax=Agaricales TaxID=5338 RepID=A0A0D2QC09_9AGAR	No hit	0	0	1	No hit	0
AF_DN108348_c0_g1	0	0	1.94071	Ascomycota	NA	UniRef90_A0A0N0NMD0 Putative importin subunit beta-4 n=1 Tax=Phialophora attae TaxID=1664694 RepID=A0A0N0NMD0_9EURO	No hit	0	0	1	No hit	0
AF_DN109831_c0_g1	0	0.0623473	1.93991	Ascomycota	D-xylulose reductase A	UniRef90_A0A178AIW6 GroES-like protein n=1 Tax=Stagonospora sp. SRC1lsM3a TaxID=765868 RepID=A0A178AIW6_9PLEO	No hit	0	0.055997	0.998431	No hit	0
AF_DN437_c0_g1	0	0.00893887	1.9391	Basidiomycota	Septin like protein spn3	UniRef90_A0A165NEI2 Septin n=1 Tax=Exidia glandulosa HHB12029 TaxID=1314781 RepID=A0A165NEI2_EXIGL	No hit	0	0.00825417	0.999966	No hit	0
AF_DN79357_c0_g1	0	0	1.93888	Basidiomycota	Prostaglandin reductase 1 (Fragment)	UniRef90_A0A165KB18 Alcohol dehydrogenase n=2 Tax=Exidia glandulosa HHB12029 TaxID=1314781 RepID=A0A165KB18_EXIGL	No hit	0	0	1	No hit	0
AF_DN19674_c0_g1	0	0	1.9388	Basidiomycota	NA	UniRef90_A0A0C3C6G3 Uncharacterized protein n=1 Tax=Hebeloma cylindrosporum h7 TaxID=686832 RepID=A0A0C3C6G3_HEBCY	No hit	0	0	1	No hit	0
AF_DN64700_c0_g1	0	0	1.93865	Ascomycota	Mitochondrial import inner membrane translocase subunit	UniRef90_A0A0D1X0R4 Mitochondrial import inner membrane translocase subunit TIM23 n=1 Tax=Exophiala sideris TaxID=1016849 RepID=A0A0D1X0R4_9EURO	No hit	0	0	1	No hit	0
AF_DN96530_c0_g1	0	0	1.93848	Ascomycota	High osmolarity signaling protein	UniRef90_A0A225ARZ1 High osmolarity signaling protein sho1 n=1 Tax=Talaromyces atroroseus TaxID=1441469 RepID=A0A225ARZ1_9EURO	No hit	0	0	1	No hit	0
AF_DN5192_c0_g1	0	0	1.9383	Ascomycota	N-acetyltransferase	UniRef90_A0A1Q5QBA3 Uncharacterized protein n=1 Tax=Talaromyces atroroseus TaxID=1441469 RepID=A0A1Q5QBA3_9EURO	No hit	0	0	1	No hit	0
AF_DN74309_c0_g1	0	0	1.93755	Ascomycota	NA	UniRef90_A0A178ABN0 1,3-beta-glucanosyltransferase n=1 Tax=Stagonospora sp. SRC1lsM3a TaxID=765868 RepID=A0A178ABN0_9PLEO	No hit	0	0	1	GH72(2)+CBM43(12)	0
AF_DN93098_c0_g1	0	0	1.93263	Ascomycota	NA	UniRef90_A0A0N1HQK9 Saccharopine dehydrogenase [NADP(+), L-glutamate-forming] n=1 Tax=Phialophora attae TaxID=1664694 RepID=A0A0N1HQK9_9EURO	No hit	0	0	1	No hit	0
AF_DN66628_c0_g1	0	0	1.93255	Ascomycota	Small heat shock protein C4	UniRef90_A0A0P7BFY7 Uncharacterized protein n=1 Tax=Neonectria ditissima TaxID=78410 RepID=A0A0P7BFY7_9HYPO	ACD	0	0	1	No hit	0
AF_DN30831_c0_g1	0	0	1.93138	No hit found	NA	UniRef90_A0A172T0U1 Movement protein n=2 Tax=unclassified Virgaviridae TaxID=1527522 RepID=A0A172T0U1_9VIRU	No hit	0	0	1	No hit	0
AF_DN65557_c0_g1	0	0.00884107	1.93136	Ascomycota	NA	No hits	No hit	0	0.00818427	0.999967	No hit	0
AF_DN57284_c0_g1	0	0	1.9312	Ascomycota	NA	UniRef90_B6Q7U6 UTP--glucose-1-phosphate uridylyltransferase n=8 Tax=Eurotiales TaxID=5042 RepID=B6Q7U6_TALMQ	No hit	0	0	1	No hit	0
AF_DN12778_c0_g1	0	0	1.9309	Ascomycota	NA	UniRef90_R1GAU0 1,3-beta-glucanosyltransferase n=1 Tax=Botryosphaeria parva (strain UCR-NP2) TaxID=1287680 RepID=R1GAU0_BOTPV	No hit	0	0	1	GH72(1-186)	0
AF_DN73989_c0_g1	0	0	1.93028	Ascomycota	Calcium ion transporter Vcx1	UniRef90_A0A0G2GC46 Putative vacuolar calcium ion transporter h(+) exchanger n=1 Tax=Diplodia seriata TaxID=420778 RepID=A0A0G2GC46_9PEZI	No hit	0	0	1	No hit	SP(Sec/SPI)	gnl|TC-DB|Q99385|2.A.19.2.2 CHROMOSOME IV READING FRAME ORF YDL128W - Saccharomyces cerevisiae (Baker's yeast).	76.7857
AF_DN10688_c0_g1	0	0.0219581	1.92951	Ascomycota	NA	UniRef90_A0A0D1ZU94 ATP-dependent RNA helicase dbp2 n=1 Tax=Exophiala mesophila TaxID=212818 RepID=A0A0D1ZU94_9EURO	No hit	0	0.0202041	0.999796	No hit	0
AF_DN66788_c0_g1	0	0	1.92944	Ascomycota	NA	UniRef90_A0A0E9NK66 Uncharacterized protein n=1 Tax=Saitoella complicata NRRL Y-17804 TaxID=698492 RepID=A0A0E9NK66_9Ascomycota	No hit	0	0	1	No hit	0
AF_DN90687_c0_g1	0	0	1.92831	Ascomycota	NA	UniRef90_A0A0N0NQ82 H/ACA ribonucleoprotein complex subunit 2 n=1 Tax=Phialophora attae TaxID=1664694 RepID=A0A0N0NQ82_9EURO	No hit	0	0	1	No hit	0
AF_DN76023_c0_g1	0	0	1.92714	Ascomycota	D-cysteine desulfhydrase	UniRef90_A0A2H3I1N7 Uncharacterized protein n=1 Tax=Penicillium occitanis TaxID=290292 RepID=A0A2H3I1N7_9EURO	No hit	0	0	1	No hit	0
AF_DN1227_c0_g1	0	0	1.92587	Ascomycota	NA	UniRef90_A0A177CBS5 Uncharacterized protein n=1 Tax=Paraphaeosphaeria sporulosa TaxID=1460663 RepID=A0A177CBS5_9PLEO	No hit	0	0	1	No hit	0
AF_DN67245_c0_g1	0	0	1.92537	Ascomycota	NA	UniRef90_A0A1Y2AAD1 Peroxin 13, N-terminal region-domain-containing protein n=1 Tax=Clohesyomyces aquaticus TaxID=1231657 RepID=A0A1Y2AAD1_9PLEO	No hit	0	0	1	No hit	0
AF_DN84901_c0_g1	0	0	1.92438	Basidiomycota	Laminarinase	UniRef90_A0A165GP67 Family 16 glycosyl hydrolase n=1 Tax=Exidia glandulosa HHB12029 TaxID=1314781 RepID=A0A165GP67_EXIGL	No hit	0	0	1	No hit	SP(Sec/SPI)
AF_DN107277_c0_g1	0	0	1.92352	Ascomycota	Malonate-semialdehyde dehydrogenase (Acetylating)/methylmalonate-semialdehyde dehydrogenase	UniRef90_A0A0L1HYZ1 Methylmalonate-semialdehyde dehydrogenase n=6 Tax=Pleosporineae TaxID=715340 RepID=A0A0L1HYZ1_9PLEO	No hit	0	0	1	No hit	0
AF_DN10131_c0_g1	0	0	1.92332	Basidiomycota	Riboflavin aldehyde-forming enzyme	UniRef90_A0A0C9XZ17 Unplaced genomic scaffold K443scaffold_15, whole genome shotgun sequence n=1 Tax=Laccaria amethystina LaAM-08-1 TaxID=1095629 RepID=A0A0C9XZ17_9AGAR	No hit	0	0	1	No hit	SP(Sec/SPI)
AF_DN56294_c0_g1	0	0	1.92293	Ascomycota	NA	UniRef90_A0A0D2JKZ5 Rhinocladiella mackenziei CBS 650.93 unplaced genomic scaffold supercont1.1, whole genome shotgun sequence n=1 Tax=Rhinocladiella mackenziei CBS 650.93 TaxID=1442369 RepID=A0A0D2JKZ5_9EURO	DnaJ	0	0	1	No hit	0
AF_DN23446_c0_g1	0	0	1.92256	Ascomycota	NA	UniRef90_W2SA64 Uncharacterized protein n=1 Tax=Cyphellophora europaea CBS 101466 TaxID=1220924 RepID=W2SA64_9EURO	No hit	0	0	1	No hit	0
AF_DN82681_c0_g1	0	0.0192293	1.92236	Ascomycota	NA	UniRef90_A0A1Y1YQY0 Uncharacterized protein n=1 Tax=Clohesyomyces aquaticus TaxID=1231657 RepID=A0A1Y1YQY0_9PLEO	No hit	0	0.0177582	0.999842	No hit	0
AF_DN54585_c0_g1	0	0	1.92229	Basidiomycota	NA	UniRef90_V2X6D1 Stress response protein n=2 Tax=Moniliophthora roreri TaxID=221103 RepID=V2X6D1_MONRO	No hit	0	0	1	No hit	0
AF_DN94972_c0_g1	0	0	1.92207	Basidiomycota	NA	UniRef90_A0A182WE44 Uncharacterized protein n=1 Tax=Anopheles minimus TaxID=112268 RepID=A0A182WE44_9DIPT	No hit	0	0	1	No hit	0
AF_DN101375_c0_g1	0	0	1.92148	Ascomycota	NA	UniRef90_A0A2H3IVL6 Uncharacterized protein n=1 Tax=Penicillium occitanis TaxID=290292 RepID=A0A2H3IVL6_9EURO	No hit	0	0	1	No hit	0
AF_DN64841_c0_g1	0	0	1.92135	Ascomycota	NA	UniRef90_A0A225AG53 Uncharacterized protein n=1 Tax=Talaromyces atroroseus TaxID=1441469 RepID=A0A225AG53_9EURO	No hit	0	0	1	No hit	0
AF_DN11537_c0_g1	0	0	1.92107	Basidiomycota	NA	UniRef90_A0A0C2XA30 Uncharacterized protein n=1 Tax=Serendipita vermifera MAFF 305830 TaxID=933852 RepID=A0A0C2XA30_9HOMO	No hit	0	0	1	No hit	0
AF_DN82746_c0_g1	0.0108909	0	1.92037	Ascomycota	NA	UniRef90_A0A0D2H1I7 Polyadenylate-binding protein n=1 Tax=Rhinocladiella mackenziei CBS 650.93 TaxID=1442369 RepID=A0A0D2H1I7_9EURO	No hit	0.0101067	0	0.999949	No hit	0
AF_DN89335_c0_g1	0	0	1.91886	Ascomycota	NA	UniRef90_A0A0G2H916 Putative casein kinase ii beta 2 subunit n=1 Tax=Phaeomoniella chlamydospora TaxID=158046 RepID=A0A0G2H916_9EURO	No hit	0	0	1	No hit	0
AF_DN8993_c0_g1	0	0	1.91821	Asco or Basidio	NA	No hits	No hit	0	0	1	No hit	0
AF_DN102687_c0_g1	0	0	1.91546	Basidiomycota	NA	UniRef90_A0A067TYP9 Uncharacterized protein n=1 Tax=Galerina marginata (strain CBS 339.88) TaxID=685588 RepID=A0A067TYP9_GALM3	No hit	0	0	1	No hit	0
AF_DN106472_c0_g1	0	0	1.91516	No hit found	NA	No hits	No hit	0	0	1	No hit	0
AF_DN98434_c0_g1	0	0	1.91427	Ascomycota	NA	UniRef90_A0A1Y1ZLT1 Uncharacterized protein (Fragment) n=1 Tax=Clohesyomyces aquaticus TaxID=1231657 RepID=A0A1Y1ZLT1_9PLEO	No hit	0	0	1	No hit	0
AF_DN60059_c0_g1	0	0	1.91324	Ascomycota	NA	UniRef90_A0A1Y1YGN1 Uncharacterized protein n=1 Tax=Clohesyomyces aquaticus TaxID=1231657 RepID=A0A1Y1YGN1_9PLEO	No hit	0	0	1	No hit	0
AF_DN92427_c0_g1	0	0	1.91311	No hit found	NA	No hits	No hit	0	0	1	No hit	0
AF_DN63327_c0_g1	0	0	1.91235	Ascomycota	NA	UniRef90_A0A1Y1M0H7 Uncharacterized protein (Fragment) n=1 Tax=Photinus pyralis TaxID=7054 RepID=A0A1Y1M0H7_PHOPY	No hit	0	0	1	No hit	0
AF_DN23496_c0_g1	0	0	1.91231	Basidiomycota	Prestalk A differentiation protein A	UniRef90_A0A165IIR0 NAD(P)-binding protein n=2 Tax=Exidia glandulosa HHB12029 TaxID=1314781 RepID=A0A165IIR0_EXIGL	No hit	0	0	1	No hit	0
AF_DN87488_c0_g1	0	0	1.91165	Basidiomycota	NA	UniRef90_A0A165PNH1 Uncharacterized protein n=1 Tax=Exidia glandulosa HHB12029 TaxID=1314781 RepID=A0A165PNH1_EXIGL	No hit	0	0	1	No hit	0
AF_DN83800_c0_g1	0.0094777	0	1.91038	Basidiomycota	NA	UniRef90_A0A165QUJ1 Uncharacterized protein n=1 Tax=Exidia glandulosa HHB12029 TaxID=1314781 RepID=A0A165QUJ1_EXIGL	No hit	0.00882978	0	0.999961	No hit	0
AF_DN92368_c0_g1	0	0	1.91004	Ascomycota	NA	UniRef90_A0A177C2F3 Uncharacterized protein n=1 Tax=Paraphaeosphaeria sporulosa TaxID=1460663 RepID=A0A177C2F3_9PLEO	No hit	0	0	1	No hit	0
AF_DN65167_c0_g1	0	0	1.90969	Ascomycota	Acyl-CoA/sterol acyltransferase	UniRef90_Q0UUN5 Uncharacterized protein n=1 Tax=Phaeosphaeria nodorum (strain SN15 / ATCC MYA-4574 / FGSC 10173) TaxID=321614 RepID=Q0UUN5_PHANO	No hit	0	0	1	No hit	0
AF_DN108049_c0_g1	0	0	1.90799	Ascomycota	NA	UniRef90_A0A165DY87 Uncharacterized protein n=1 Tax=Exidia glandulosa HHB12029 TaxID=1314781 RepID=A0A165DY87_EXIGL	No hit	0	0	1	No hit	0
AF_DN104097_c0_g1	0	0	1.90739	Basidiomycota	NA	UniRef90_A0A067SWM0 Uncharacterized protein n=1 Tax=Galerina marginata (strain CBS 339.88) TaxID=685588 RepID=A0A067SWM0_GALM3	No hit	0	0	1	No hit	0
AF_DN18150_c0_g1	0	0	1.90712	Ascomycota	NA	UniRef90_A0A175W809 Uncharacterized protein n=1 Tax=Madurella mycetomatis TaxID=100816 RepID=A0A175W809_9PEZI	No hit	0	0	1	No hit	0
AF_DN108046_c0_g1	0	0	1.90614	Ascomycota	NA	UniRef90_B8M0P5 Uncharacterized protein n=3 Tax=Talaromyces TaxID=5094 RepID=B8M0P5_TALSN	No hit	0	0	1	No hit	0
AF_DN85365_c0_g1	0	0	1.90586	Ascomycota	NA	UniRef90_W2S1X7 Polyadenylate-binding protein n=1 Tax=Cyphellophora europaea CBS 101466 TaxID=1220924 RepID=W2S1X7_9EURO	No hit	0	0	1	No hit	0
AF_DN20261_c0_g1	0	0	1.90462	Ascomycota	Stomatin	UniRef90_A0A167QAV1 Stomatin family protein n=1 Tax=Sporothrix insectorum RCEF 264 TaxID=1081102 RepID=A0A167QAV1_9PEZI	No hit	0	0	1	No hit	0
AF_DN89602_c0_g1	0	0	1.90434	Basidiomycota	NA	UniRef90_A0A2R6S3V1 Uncharacterized protein n=1 Tax=Phlebia centrifuga TaxID=98765 RepID=A0A2R6S3V1_9APHY	No hit	0	0	1	No hit	0
AF_DN83620_c0_g1	0	0	1.90415	Ascomycota	NA	UniRef90_W6ZCY5 Uncharacterized protein n=1 Tax=Bipolaris oryzae ATCC 44560 TaxID=930090 RepID=W6ZCY5_COCMI	No hit	0	0	1	No hit	0
AF_DN56684_c0_g1	0	0	1.90229	No hit found	NA	UniRef90_K2RFU3 Barwin-related endoglucanase n=1 Tax=Macrophomina phaseolina (strain MS6) TaxID=1126212 RepID=K2RFU3_MACPH	No hit	0	0	1	No hit	SP(Sec/SPI)
AF_DN55189_c0_g1	0	0	1.90215	No hit found	NA	No hits	No hit	0	0	1	No hit	0
AF_DN84126_c0_g1	0	0	1.90107	Asco or Basidio	NA	No hits	No hit	0	0	1	No hit	0
AF_DN105778_c0_g1	0	0	1.90033	Basidiomycota	NA	No hits	No hit	0	0	1	No hit	0
AF_DN23020_c0_g1	0	0	1.89991	Basidiomycota	RNA binding domain-containing protein	UniRef90_A0A165IQP9 Uncharacterized protein n=1 Tax=Exidia glandulosa HHB12029 TaxID=1314781 RepID=A0A165IQP9_EXIGL	No hit	0	0	1	No hit	0
AF_DN93054_c0_g1	0	0	1.8985	Basidiomycota	NA	UniRef90_A0A060S2Y9 Uncharacterized protein n=1 Tax=Pycnoporus cinnabarinus TaxID=5643 RepID=A0A060S2Y9_PYCCI	No hit	0	0	1	No hit	0
AF_DN64961_c0_g1	0	0	1.89673	Basidiomycota	Thiamin biosynthetic enzyme (Fragment)	UniRef90_A0A0C2YQE1 Thiamine thiazole synthase n=2 Tax=Agaricales TaxID=5338 RepID=A0A0C2YQE1_HEBCY	No hit	0	0	1	No hit	0
AF_DN84027_c0_g1	0	0	1.89622	No hit found	NA	No hits	No hit	0	0	1	No hit	0
AF_DN88249_c0_g1	0	0	1.89337	Basidiomycota	NA	UniRef90_A0A0C3BSV0 Uncharacterized protein n=1 Tax=Hebeloma cylindrosporum h7 TaxID=686832 RepID=A0A0C3BSV0_HEBCY	No hit	0	0	1	No hit	0
AF_DN2386_c0_g1	0	0	1.89335	Basidiomycota	NA	UniRef90_A0A067SM68 Uncharacterized protein n=1 Tax=Galerina marginata (strain CBS 339.88) TaxID=685588 RepID=A0A067SM68_GALM3	No hit	0	0	1	No hit	0
AF_DN6341_c0_g1	0	0	1.89334	Ascomycota	NA	UniRef90_A0A0N0NPQ3 Uncharacterized protein n=1 Tax=Phialophora attae TaxID=1664694 RepID=A0A0N0NPQ3_9EURO	No hit	0	0	1	No hit	0
AF_DN61036_c0_g1	0	0.047378	1.89313	Ascomycota	NA	UniRef90_B6QPW6 RING and UBP finger domain protein, putative n=3 Tax=Eurotiales TaxID=5042 RepID=B6QPW6_TALMQ	No hit	0	0.0435323	0.999052	No hit	0
AF_DN59095_c0_g1	0	0	1.89188	Ascomycota	NA	UniRef90_R7YY51 Uncharacterized protein n=1 Tax=Coniosporium apollinis (strain CBS 100218) TaxID=1168221 RepID=R7YY51_CONA1	No hit	0	0	1	No hit	0
AF_DN73488_c0_g1	0	0	1.89142	Ascomycota	NA	UniRef90_Q03134 Formate dehydrogenase n=2 Tax=Aspergillus TaxID=5052 RepID=FDH_EMENI	No hit	0	0	1	No hit	0
AF_DN59632_c0_g1	0	0	1.89117	Ascomycota	NA	UniRef90_A0A0D2FTS3 Uncharacterized protein n=1 Tax=Phialophora americana TaxID=5601 RepID=A0A0D2FTS3_9EURO	No hit	0	0	1	No hit	0
AF_DN65801_c0_g1	0	0	1.8898	Ascomycota	NA	UniRef90_A0A1Y1XY23 Glucose transporter-like protein n=1 Tax=Clohesyomyces aquaticus TaxID=1231657 RepID=A0A1Y1XY23_9PLEO	No hit	0	0	1	No hit	0
AF_DN66573_c0_g1	0.0492343	0	1.88873	Ascomycota	NA	UniRef90_A0A072PJC2 Uncharacterized protein n=1 Tax=Exophiala aquamarina CBS 119918 TaxID=1182545 RepID=A0A072PJC2_9EURO	No hit	0.0452589	0	0.998975	No hit	0
AF_DN101522_c0_g1	0	0	1.88811	Ascomycota	Tryparedoxin peroxidase	UniRef90_Q0V6N0 Uncharacterized protein n=1 Tax=Phaeosphaeria nodorum (strain SN15 / ATCC MYA-4574 / FGSC 10173) TaxID=321614 RepID=Q0V6N0_PHANO	No hit	0	0	1	No hit	0
AF_DN105991_c0_g1	0	0	1.88801	No hit found	NA	No hits	No hit	0	0	1	No hit	0
AF_DN92522_c0_g1	0	0	1.88731	Basidiomycota	NA	No hits	No hit	0	0	1	No hit	0
AF_DN19319_c0_g1	0	0	1.88519	Ascomycota	NA	UniRef90_A0A177CQ31 FAD/NAD(P)-binding domain-containing protein n=1 Tax=Paraphaeosphaeria sporulosa TaxID=1460663 RepID=A0A177CQ31_9PLEO	No hit	0	0	1	No hit	0
AF_DN61527_c0_g1	0	0	1.88516	Ascomycota	NA	UniRef90_Q0V083 Uncharacterized protein n=1 Tax=Phaeosphaeria nodorum (strain SN15 / ATCC MYA-4574 / FGSC 10173) TaxID=321614 RepID=Q0V083_PHANO	No hit	0	0	1	No hit	0
AF_DN1897_c0_g1	0	0	1.8846	No hit found	NA	No hits	No hit	0	0	1	No hit	0
AF_DN83371_c0_g1	0	0	1.88438	Basidiomycota	NA	UniRef90_C0LJH0 BCL-2 associated athanogene 3-like protein (Fragment) n=1 Tax=Serendipita indica TaxID=65672 RepID=C0LJH0_SERIN	No hit	0	0	1	No hit	0
AF_DN57488_c0_g1	0	0	1.8836	Ascomycota	NA	UniRef90_A0A0C3HRL4 Uncharacterized protein n=1 Tax=Oidiodendron maius Zn TaxID=913774 RepID=A0A0C3HRL4_9PEZI	No hit	0	0	1	No hit	0
AF_DN96765_c0_g1	0	0	1.88256	Basidiomycota	Translation initiation factor 2C	UniRef90_A0A0D2PMW0 Uncharacterized protein n=1 Tax=Hypholoma sublateritium FD-334 SS-4 TaxID=945553 RepID=A0A0D2PMW0_9AGAR	No hit	0	0	1	No hit	0
AF_DN68014_c0_g1	0	0	1.88167	Basidiomycota	Omega-6 fatty acid desaturase (Delta-12 desaturase)	UniRef90_A0A067TUS8 Uncharacterized protein n=1 Tax=Galerina marginata (strain CBS 339.88) TaxID=685588 RepID=A0A067TUS8_GALM3	No hit	0	0	1	No hit	0
AF_DN83157_c0_g1	0	0	1.88124	No hit found	NA	UniRef90_A0A0G2GQV7 Putative c2h2 transcription factor n=1 Tax=Phaeomoniella chlamydospora TaxID=158046 RepID=A0A0G2GQV7_9EURO	No hit	0	0	1	No hit	0
AF_DN64728_c0_g1	0	0.0147627	1.88059	Ascomycota	NA	UniRef90_Q2HEY3 Uncharacterized protein n=1 Tax=Chaetomium globosum (strain ATCC 6205 / CBS 148.51 / DSM 1962 / NBRC 6347/ NRRL 1970) TaxID=306901 RepID=Q2HEY3_CHAGB	No hit	0	0.0138501	0.999904	No hit	0
AF_DN80017_c0_g1	0	0	1.87947	Ascomycota	NA	UniRef90_R7YGB3 Uncharacterized protein n=1 Tax=Coniosporium apollinis (strain CBS 100218) TaxID=1168221 RepID=R7YGB3_CONA1	No hit	0	0	1	No hit	0
AF_DN108739_c0_g1	0	0	1.87864	No hit found	NA	No hits	No hit	0	0	1	No hit	SP(Sec/SPI)
AF_DN60930_c0_g1	0	0	1.87754	Ascomycota	NA	UniRef90_A0A0G2F4T9 Protein SEY1 n=1 Tax=Phaeomoniella chlamydospora TaxID=158046 RepID=A0A0G2F4T9_9EURO	No hit	0	0	1	No hit	0
AF_DN103131_c0_g1	0	0	1.87674	Ascomycota	NA	UniRef90_A0A2H3IWH1 Bestrophin/UPF0187 n=1 Tax=Penicillium occitanis TaxID=290292 RepID=A0A2H3IWH1_9EURO	No hit	0	0	1	No hit	0	gnl|TC-DB|Q5BB29|1.A.46.2.1 Putative uncharacterized protein OS=Emericella nidulans GN=AN2251.2 PE=4 SV=1	71.6418
AF_DN86657_c0_g1	0	0	1.87378	Ascomycota	Elongation factor 1-beta	UniRef90_Q0D163 Elongation factor 1-beta n=1 Tax=Aspergillus terreus (strain NIH 2624 / FGSC A1156) TaxID=341663 RepID=Q0D163_ASPTN	No hit	0	0	1	No hit	0
AF_DN90597_c0_g1	0	0	1.87332	Ascomycota	NA	No hits	No hit	0	0	1	No hit	0
AF_DN86410_c0_g1	0.0171223	0	1.8721	Ascomycota	NA	UniRef90_A0A0N1HWI7 Vacuolar protein sorting-associated protein 1 n=1 Tax=Phialophora attae TaxID=1664694 RepID=A0A0N1HWI7_9EURO	No hit	0.0160895	0	0.999871	No hit	0	gnl|TC-DB|P21576|9.A.63.1.1 Vacuolar protein sorting-associated protein 1 OS=Saccharomyces cerevisiae (strain ATCC 204508/ S288c) GN=VPS1 PE=1 SV=2	79.5539
AF_DN54809_c0_g1	0	0	1.87078	Ascomycota	NA	UniRef90_A0A1Y2MFB4 Uncharacterized protein n=1 Tax=Epicoccum nigrum TaxID=105696 RepID=A0A1Y2MFB4_EPING	No hit	0	0	1	No hit	0
AF_DN85869_c0_g1	0	0	1.87047	Ascomycota	GTP-binding protein EsdC	UniRef90_A0A177C1K6 Uncharacterized protein n=1 Tax=Paraphaeosphaeria sporulosa TaxID=1460663 RepID=A0A177C1K6_9PLEO	No hit	0	0	1	No hit	0
AF_DN94703_c0_g1	0	0	1.86972	Ascomycota	Phosphoenolpyruvate carboxykinase	UniRef90_Q0UPM4 Uncharacterized protein n=2 Tax=Pleosporineae TaxID=715340 RepID=Q0UPM4_PHANO	No hit	0	0	1	No hit	0
AF_DN67497_c0_g1	0	0	1.8696	Basidiomycota	NA	UniRef90_A0A0W0F679 Uncharacterized protein n=2 Tax=Moniliophthora roreri TaxID=221103 RepID=A0A0W0F679_9AGAR	No hit	0	0	1	No hit	0
[truncated: 997 more rows]

## Sheet: Agave sisalana
ID	Leaf mean expression (TPM)	Stem mean expression (TPM)	Root mean expression (TPM)	Classification	Pannzer Annotation	Blast Uniref90 annotation	HSP db classification	Leaf SPM	Stem SPM	Root SPM	CAZy	SignalP	TCDB hit description	TCDB Alignment cov (%)
AS_DN46625_c0_g1	0.0223492	0.0495662	181.653	Ascomycota	Heat shock protein 30	UniRef90_A0A2H3J0Z6 HSP20-like chaperone n=1 Tax=Penicillium occitanis TaxID=290292 RepID=A0A2H3J0Z6_9EURO	ACD	0.00424417	0.00928921	0.999948	No hit	0
AS_DN51868_c0_g1	0.239335	1.323	175.55	Ascomycota	Cell surface protein, putative	UniRef90_B8M150 Cell surface protein, putative n=1 Tax=Talaromyces stipitatus (strain ATCC 10500 / CBS 375.48 / QM 6759 /NRRL 1006) TaxID=441959 RepID=B8M150_TALSN	No hit	0.040901	0.160661	0.986162	No hit	0
AS_DN35302_c0_g1	0.00957377	0.0132052	148.137	Ascomycota	Heat shock protein Hsp20	UniRef90_A0A2H3IPC9 Complex 1 LYR protein n=1 Tax=Penicillium occitanis TaxID=290292 RepID=A0A2H3IPC9_9EURO	ACD	0.00190378	0.00262119	0.999995	No hit	0
AS_DN90632_c0_g1	0.0524413	0.0578015	145.042	Basidiomycota	Heat shock protein 9	UniRef90_A0A165EC75 Uncharacterized protein n=1 Tax=Exidia glandulosa HHB12029 TaxID=1314781 RepID=A0A165EC75_EXIGL	No hit	0.0102544	0.0112735	0.999884	No hit	0
AS_DN57516_c1_g1	28.5885	42.9965	133.608	Ascomycota	Translation elongation factor 1 alpha subunit (Fragment)	UniRef90_A0A163GAQ2 Elongation factor 1-alpha n=1 Tax=Didymella rabiei TaxID=5454 RepID=A0A163GAQ2_DIDRA	No hit	0.479879	0.536082	0.694501	No hit	0
AS_DN73916_c0_g1	0.0136726	0	113.236	Ascomycota	Heat shock protein 30	UniRef90_A0A2H3ICD9 HSP20-like chaperone n=1 Tax=Penicillium occitanis TaxID=290292 RepID=A0A2H3ICD9_9EURO	ACD	0.002866	0	0.999996	No hit	0
AS_DN53864_c3_g1	2.90302	2.67371	99.5239	Ascomycota	NA	UniRef90_A0A0J0XBS3 Heat-shock protein 90 n=1 Tax=Cutaneotrichosporon oleaginosum TaxID=879819 RepID=A0A0J0XBS3_9TREE	Hsp90	0.273428	0.261271	0.925729	No hit	0	gnl|TC-DB|P08238|8.A.163.1.1 Heat shock protein HSP 90-beta OS=Homo sapiens OX=9606 GN=HSP90AB1 PE=1 SV=4	76.2846
AS_DN59592_c8_g2	0.132911	0	99.4984	Ascomycota	Heat shock protein 70 (Fragment)	UniRef90_V5FHU7 Molecular chaperone Hsp70 n=2 Tax=Eurotiales TaxID=5042 RepID=V5FHU7_BYSSN	Hsp70	0.0270589	0	0.999634	No hit	0	gnl|TC-DB|P10591|3.A.16.1.6 Heat shock protein SSA1 OS=Saccharomyces cerevisiae (strain ATCC 204508 / S288c) OX=559292 GN=SSA1 PE=1 SV=4	94.0397
AS_DN39474_c0_g1	0.0180236	0.0247577	98.9378	Basidiomycota	NA	No hits	No hit	0.00387937	0.0053112	0.999978	No hit	0
AS_DN51359_c2_g1	37.0815	61.562	71.3344	Ascomycota	Heat shock 70 kDa protein (Fragment)	UniRef90_A0A139I2Z2 Uncharacterized protein n=2 Tax=leotiomyceta TaxID=716546 RepID=A0A139I2Z2_9PEZI	Hsp70	0.521641	0.592788	0.61359	No hit	0	gnl|TC-DB|P10591|3.A.16.1.6 Heat shock protein SSA1 OS=Saccharomyces cerevisiae (strain ATCC 204508 / S288c) OX=559292 GN=SSA1 PE=1 SV=4	94.3038
AS_DN53419_c0_g2	0.284117	0.162864	67.3109	Ascomycota	Heat shock 70 kDa protein (Fragment)	UniRef90_V5FHU7 Molecular chaperone Hsp70 n=2 Tax=Eurotiales TaxID=5042 RepID=V5FHU7_BYSSN	Hsp70	0.0590605	0.0356354	0.997618	No hit	0	gnl|TC-DB|P22953|1.A.33.1.1 HEAT SHOCK COGNATE 70 KDA PROTEIN 1 (HSC70.1) - Arabidopsis thaliana (Mouse-ear cress).	80.4878
AS_DN43419_c1_g1	0	0	66.8211	Ascomycota	Chaperone/heat shock protein Hsp12	UniRef90_A0A2H3IMJ7 Heat shock protein 9/12 n=1 Tax=Penicillium occitanis TaxID=290292 RepID=A0A2H3IMJ7_9EURO	No hit	0	0	1	No hit	0
AS_DN54444_c0_g1	0.0243399	0.0657638	66.4292	No hit found	NA	UniRef90_M7S6H0 Uncharacterized protein n=1 Tax=Eutypa lata (strain UCR-EL1) TaxID=1287681 RepID=M7S6H0_EUTLA	No hit	0.00570999	0.0151228	0.999869	No hit	0
AS_DN53419_c0_g3	7.77067	19.3182	56.72	Ascomycota	Heat shock 70kDa protein 5	UniRef90_A0A0J8RFI9 Heat shock 70 kDa protein C n=1 Tax=Coccidioides immitis H538.4 TaxID=396776 RepID=A0A0J8RFI9_COCIT	Hsp70	0.394919	0.54771	0.737599	No hit	0	gnl|TC-DB|P08107|1.A.33.1.3 Heat shock 70 kDa protein 1 (HSP70.1) (HSP70-1/HSP70-2) - Homo sapiens (Human).	70.3518
[truncated: 4,299 more rows]

## Sheet: Hybrid 11648
ID	Leaf mean expression (TPM)	Stem mean expression (TPM)	Root mean expression (TPM)	Classification	Pannzer Annotation	Blast Uniref90 annotation	HSP db classification	Leaf SPM	Stem SPM	Root SPM	CAZy	SignalP	TCDB hit description	TCDB Alignment cov (%)
[truncated: 3,433 more rows]

## Sheet: CAZy
Agave fourcroydes						Agave sisalana						Hybrid 11648
[truncated: 116 more rows]

[truncated: 2 more sheets: SignalP, TCDB]
