# Supplementary material for: Fungal communities represent the majority of root-specific transcripts in the transcriptomes of Agave plants grown in semiarid regions
Source: PeerJ. 2022 May 2;10:e13252. doi: 10.7717/peerj.13252 (PMC9070324; doi:10.7717/peerj.13252)
Supplement: Supplemental Information 5 — We used SortMeRNA with default parameters to filter the reads that had similarities to the 28S rRNA database. Then we filtered the reads belonging to fungi to assess the percentages of fungal reads in our datasets (“Percentages_28S” sheet). Finally, we listed the top 5 fungal species that had more abundant reads in each RNA-seq library (“28S_top5” sheet). [file peerj-10-13252-s005.xlsx]

## Sheet: 28S
Cultivar	Sample	# of fungal blast hits	# total blast hits	% fungal reads
Agave fourcroydes	Leaf 1	14663	4321279	0.339321
	Leaf 2	16548	4858435	0.340604
	Leaf 3	11447	2534221	0.451697
	Stem 1	17421	2616017	0.665936
	Stem 2	9553	1755175	0.544276
	Stem 3	7455	1230285	0.605957
	Root 1	152989	2092737	7.31047
	Root 2	411374	2753639	14.9393
	Root 3	509013	3255602	15.635
Agave sisalana	Leaf 1	4853	1065540	0.45545
	Leaf 2	16817	2209675	0.761062
	Leaf 3	8610	1637230	0.525888
	Stem 1	16988	2450344	0.69329
	Stem 2	10684	2893505	0.369241
	Stem 3	12011	2128869	0.564196
	Root 1	260693	1256071	20.7546
	Root 2	189854	2186970	8.68114
	Root 3	224654	1114340	20.1603
Hybrid 11648	Leaf 1	3743	726957	0.514886
	Leaf 2	2373	356974	0.664754
	Leaf 3	8563	1774084	0.482672
	Stem 1	7159	1723159	0.415458
	Stem 2	5619	1074098	0.523137
	Stem 3	44646	9239140	0.483227
	Root 1	529943	8522306	6.21831
	Root 2	318140	1527096	20.833
	Root 3	142880	2035079	7.02086

## Sheet: 28S_top5
Cultivar	Sample	Top 1	Top 2	Top 3	Top 4	Top 5
Agave fourcroydes	Leaf 1	Dikarya;Basidiomycota;Agaricomycotina;Tremellomycetes;Tremellales;Tremellaceae;Filobasidiella;Filobasidiella/Cryptococcus neoformans species complex;	Dikarya;Ascomycota;Pezizomycotina;Sordariomycetes;Hypocreomycetidae;Glomerellales;Plectosphaerellaceae;mitosporic Plectosphaerellaceae;Verticillium;	Dikarya;Ascomycota;Pezizomycotina;Eurotiomycetes;Chaetothyriomycetidae;Verrucariales;Verrucariaceae;Verrucaria;	Cryptomycota;Rozella;	Dikarya;Ascomycota;Pezizomycotina;Dothideomycetes;Pleosporomycetidae;Pleosporales;Pleosporineae;Phaeosphaeriaceae;Parastagonospora;
	Leaf 2	Dikarya;Basidiomycota;Agaricomycotina;Tremellomycetes;Tremellales;Tremellaceae;Filobasidiella;Filobasidiella/Cryptococcus neoformans species complex;	Dikarya;Ascomycota;Pezizomycotina;Sordariomycetes;Hypocreomycetidae;Glomerellales;Plectosphaerellaceae;mitosporic Plectosphaerellaceae;Verticillium;	Dikarya;Ascomycota;Pezizomycotina;Eurotiomycetes;Chaetothyriomycetidae;Verrucariales;Verrucariaceae;Verrucaria;	Cryptomycota;Rozella;	Dikarya;Ascomycota;Pezizomycotina;Dothideomycetes;Pleosporomycetidae;Pleosporales;Pleosporineae;Phaeosphaeriaceae;Parastagonospora;
	Leaf 3	Dikarya;Basidiomycota;Agaricomycotina;Tremellomycetes;Tremellales;Tremellaceae;Filobasidiella;Filobasidiella/Cryptococcus neoformans species complex;	Cryptomycota;Rozella;	Dikarya;Basidiomycota;Ustilaginomycotina;Exobasidiomycetes;Malasseziales;Malasseziaceae;Malassezia;	Dikarya;Ascomycota;Pezizomycotina;Eurotiomycetes;Chaetothyriomycetidae;Verrucariales;Verrucariaceae;Verrucaria;	Dikarya;Ascomycota;Pezizomycotina;Dothideomycetes;Pleosporomycetidae;Pleosporales;Pleosporineae;Phaeosphaeriaceae;Parastagonospora;
	Stem 1	Dikarya;Basidiomycota;Agaricomycotina;Tremellomycetes;Tremellales;Tremellaceae;Filobasidiella;Filobasidiella/Cryptococcus neoformans species complex;	Dikarya;Ascomycota;Pezizomycotina;Eurotiomycetes;Chaetothyriomycetidae;Verrucariales;Verrucariaceae;Verrucaria;	Cryptomycota;Rozella;	Dikarya;Ascomycota;Saccharomycotina;Saccharomycetes;Saccharomycetales;Saccharomycetaceae;Saccharomyces;	Dikarya;Ascomycota;Saccharomycotina;Saccharomycetes;Saccharomycetales;Saccharomycetaceae;Saccharomyces;
	Stem 2	Dikarya;Basidiomycota;Agaricomycotina;Tremellomycetes;Tremellales;Tremellaceae;Filobasidiella;Filobasidiella/Cryptococcus neoformans species complex;	Dikarya;Ascomycota;Pezizomycotina;Eurotiomycetes;Chaetothyriomycetidae;Verrucariales;Verrucariaceae;Verrucaria;	Cryptomycota;Rozella;	Dikarya;Ascomycota;Pezizomycotina;Sordariomycetes;Hypocreomycetidae;Glomerellales;Plectosphaerellaceae;mitosporic Plectosphaerellaceae;Verticillium;	Dikarya;Ascomycota;Pezizomycotina;Dothideomycetes;Pleosporomycetidae;Pleosporales;Pleosporineae;Phaeosphaeriaceae;Parastagonospora;
	Stem 3	Dikarya;Basidiomycota;Agaricomycotina;Tremellomycetes;Tremellales;Tremellaceae;Filobasidiella;Filobasidiella/Cryptococcus neoformans species complex;	Dikarya;Ascomycota;Pezizomycotina;Eurotiomycetes;Chaetothyriomycetidae;Verrucariales;Verrucariaceae;Verrucaria;	Cryptomycota;Rozella;	Dikarya;Ascomycota;Pezizomycotina;Dothideomycetes;Pleosporomycetidae;Pleosporales;Pleosporineae;Phaeosphaeriaceae;Parastagonospora;	Dikarya;Ascomycota;Pezizomycotina;Sordariomycetes;Hypocreomycetidae;Glomerellales;Plectosphaerellaceae;mitosporic Plectosphaerellaceae;Verticillium;
	Root 1	Dikarya;Ascomycota;Pezizomycotina;Dothideomycetes;Pleosporomycetidae;Pleosporales;Pleosporineae;Phaeosphaeriaceae;Parastagonospora;	Dikarya;Basidiomycota;Agaricomycotina;Tremellomycetes;Tremellales;Tremellaceae;Filobasidiella;Filobasidiella/Cryptococcus neoformans species complex;	Dikarya;Ascomycota;Pezizomycotina;Eurotiomycetes;Eurotiomycetidae;Eurotiales;Trichocomaceae;Talaromyces;	Dikarya;Basidiomycota;Agaricomycotina;Agaricomycetes;Hymenochaetales;Hymenochaetaceae;Phellinus;	Dikarya;Ascomycota;Saccharomycotina;Saccharomycetes;Saccharomycetales;Saccharomycetaceae;Saccharomyces;
	Root 2	Dikarya;Ascomycota;Pezizomycotina;Dothideomycetes;Pleosporomycetidae;Pleosporales;Pleosporineae;Phaeosphaeriaceae;Parastagonospora;	Dikarya;Basidiomycota;Agaricomycotina;Tremellomycetes;Tremellales;Tremellaceae;Filobasidiella;Filobasidiella/Cryptococcus neoformans species complex;	Dikarya;Basidiomycota;Agaricomycotina;Agaricomycetes;Auriculariales;Auriculariaceae;Auricularia;	Dikarya;Ascomycota;Saccharomycotina;Saccharomycetes;Saccharomycetales;Saccharomycetaceae;Eremothecium;	Dikarya;Ascomycota;Saccharomycotina;Saccharomycetes;Saccharomycetales;Saccharomycetaceae;Saccharomyces;
	Root 3	Dikarya;Ascomycota;Pezizomycotina;Dothideomycetes;Pleosporomycetidae;Pleosporales;Pleosporineae;Phaeosphaeriaceae;Parastagonospora;	Dikarya;Basidiomycota;Agaricomycotina;Tremellomycetes;Tremellales;Tremellaceae;Filobasidiella;Filobasidiella/Cryptococcus neoformans species complex;	Dikarya;Ascomycota;Pezizomycotina;Eurotiomycetes;Eurotiomycetidae;Eurotiales;Trichocomaceae;Talaromyces;	Dikarya;Ascomycota;Saccharomycotina;Saccharomycetes;Saccharomycetales;Saccharomycetaceae;Eremothecium;	Dikarya;Ascomycota;Pezizomycotina;Eurotiomycetes;Eurotiomycetidae;Onygenales;mitosporic Onygenales;Coccidioides;
Agave sisalana	Leaf 1	Dikarya;Basidiomycota;Agaricomycotina;Tremellomycetes;Tremellales;Tremellaceae;Filobasidiella;Filobasidiella/Cryptococcus neoformans species complex;	Dikarya;Ascomycota;Pezizomycotina;Eurotiomycetes;Chaetothyriomycetidae;Verrucariales;Verrucariaceae;Verrucaria;	Cryptomycota;Rozella;	Dikarya;Ascomycota;Pezizomycotina;Sordariomycetes;Hypocreomycetidae;Glomerellales;Plectosphaerellaceae;mitosporic Plectosphaerellaceae;Verticillium;	Dikarya;Ascomycota;Pezizomycotina;Dothideomycetes;Pleosporomycetidae;Pleosporales;Pleosporineae;Phaeosphaeriaceae;Parastagonospora;
	Leaf 2	Dikarya;Basidiomycota;Agaricomycotina;Tremellomycetes;Tremellales;Tremellaceae;Filobasidiella;Filobasidiella/Cryptococcus neoformans species complex;	Dikarya;Ascomycota;Pezizomycotina;Eurotiomycetes;Chaetothyriomycetidae;Verrucariales;Verrucariaceae;Verrucaria;	Cryptomycota;Rozella;	Dikarya;Ascomycota;Pezizomycotina;Sordariomycetes;Hypocreomycetidae;Hypocreales;Hypocreaceae;Trichoderma;	Dikarya;Ascomycota;Pezizomycotina;Sordariomycetes;Hypocreomycetidae;Hypocreales;Nectriaceae;mitosporic Nectriaceae;Fusarium;Fusarium oxysporum species complex;
	Leaf 3	Dikarya;Basidiomycota;Agaricomycotina;Tremellomycetes;Tremellales;Tremellaceae;Filobasidiella;Filobasidiella/Cryptococcus neoformans species complex;	Dikarya;Ascomycota;Pezizomycotina;Eurotiomycetes;Chaetothyriomycetidae;Verrucariales;Verrucariaceae;Verrucaria;	Cryptomycota;Rozella;	Dikarya;Ascomycota;Pezizomycotina;Eurotiomycetes;Eurotiomycetidae;Eurotiales;Trichocomaceae;Talaromyces;	Dikarya;Ascomycota;Pezizomycotina;Sordariomycetes;Hypocreomycetidae;Glomerellales;Plectosphaerellaceae;mitosporic Plectosphaerellaceae;Verticillium;
	Stem 1	Dikarya;Basidiomycota;Agaricomycotina;Tremellomycetes;Tremellales;Tremellaceae;Filobasidiella;Filobasidiella/Cryptococcus neoformans species complex;	Dikarya;Ascomycota;Pezizomycotina;Eurotiomycetes;Chaetothyriomycetidae;Verrucariales;Verrucariaceae;Verrucaria;	Dikarya;Ascomycota;Saccharomycotina;Saccharomycetes;Saccharomycetales;Saccharomycetaceae;Saccharomyces;	Dikarya;Ascomycota;Saccharomycotina;Saccharomycetes;Saccharomycetales;Saccharomycetaceae;Eremothecium;	Dikarya;Ascomycota;Saccharomycotina;Saccharomycetes;Saccharomycetales;Saccharomycetaceae;Saccharomyces;
	Stem 2	Dikarya;Basidiomycota;Agaricomycotina;Tremellomycetes;Tremellales;Tremellaceae;Filobasidiella;Filobasidiella/Cryptococcus neoformans species complex;	Dikarya;Ascomycota;Pezizomycotina;Eurotiomycetes;Chaetothyriomycetidae;Verrucariales;Verrucariaceae;Verrucaria;	Cryptomycota;Rozella;	Dikarya;Ascomycota;Pezizomycotina;Sordariomycetes;Hypocreomycetidae;Glomerellales;Plectosphaerellaceae;mitosporic Plectosphaerellaceae;Verticillium;	Dikarya;Ascomycota;Pezizomycotina;Eurotiomycetes;Eurotiomycetidae;Onygenales;Arthrodermataceae;Arthroderma;
	Stem 3	Dikarya;Basidiomycota;Agaricomycotina;Tremellomycetes;Tremellales;Tremellaceae;Filobasidiella;Filobasidiella/Cryptococcus neoformans species complex;	Dikarya;Ascomycota;Pezizomycotina;Eurotiomycetes;Chaetothyriomycetidae;Verrucariales;Verrucariaceae;Verrucaria;	Dikarya;Ascomycota;Pezizomycotina;Dothideomycetes;Pleosporomycetidae;Pleosporales;Pleosporineae;Phaeosphaeriaceae;Parastagonospora;	Dikarya;Ascomycota;Pezizomycotina;Sordariomycetes;Hypocreomycetidae;Glomerellales;Plectosphaerellaceae;mitosporic Plectosphaerellaceae;Verticillium;	Cryptomycota;Rozella;
	Root 1	Dikarya;Ascomycota;Pezizomycotina;Dothideomycetes;Pleosporomycetidae;Pleosporales;Pleosporineae;Phaeosphaeriaceae;Parastagonospora;	Dikarya;Basidiomycota;Agaricomycotina;Tremellomycetes;Tremellales;Tremellaceae;Filobasidiella;Filobasidiella/Cryptococcus neoformans species complex;	Dikarya;Ascomycota;Pezizomycotina;Eurotiomycetes;Eurotiomycetidae;Eurotiales;Trichocomaceae;Talaromyces;	Dikarya;Ascomycota;Saccharomycotina;Saccharomycetes;Saccharomycetales;Saccharomycetaceae;Eremothecium;	Dikarya;Basidiomycota;Agaricomycotina;Agaricomycetes;Auriculariales;Auriculariaceae;Auricularia;
	Root 2	Dikarya;Ascomycota;Pezizomycotina;Dothideomycetes;Pleosporomycetidae;Pleosporales;Pleosporineae;Phaeosphaeriaceae;Parastagonospora;	Dikarya;Ascomycota;Pezizomycotina;Eurotiomycetes;Eurotiomycetidae;Eurotiales;Trichocomaceae;Talaromyces;	Dikarya;Basidiomycota;Agaricomycotina;Tremellomycetes;Tremellales;Tremellaceae;Filobasidiella;Filobasidiella/Cryptococcus neoformans species complex;	Dikarya;Ascomycota;Pezizomycotina;Eurotiomycetes;Eurotiomycetidae;Eurotiales;Aspergillaceae;Aspergillus;	Dikarya;Ascomycota;Saccharomycotina;Saccharomycetes;Saccharomycetales;Saccharomycetaceae;Eremothecium;
	Root 3	Dikarya;Ascomycota;Pezizomycotina;Eurotiomycetes;Eurotiomycetidae;Eurotiales;Trichocomaceae;Talaromyces;	Dikarya;Ascomycota;Pezizomycotina;Dothideomycetes;Pleosporomycetidae;Pleosporales;Pleosporineae;Phaeosphaeriaceae;Parastagonospora;	Dikarya;Ascomycota;Pezizomycotina;Eurotiomycetes;Eurotiomycetidae;Eurotiales;Aspergillaceae;Aspergillus;	Dikarya;Ascomycota;Pezizomycotina;Eurotiomycetes;Eurotiomycetidae;Onygenales;mitosporic Onygenales;Coccidioides;	Dikarya;Ascomycota;Taphrinomycotina;Schizosaccharomycetes;Schizosaccharomycetales;Schizosaccharomycetaceae;Schizosaccharomyces;
Hybrid 11648	Leaf 1	Dikarya;Basidiomycota;Agaricomycotina;Tremellomycetes;Tremellales;Tremellaceae;Filobasidiella;Filobasidiella/Cryptococcus neoformans species complex;	Dikarya;Ascomycota;Pezizomycotina;Eurotiomycetes;Chaetothyriomycetidae;Verrucariales;Verrucariaceae;Verrucaria;	Cryptomycota;Rozella;	Dikarya;Ascomycota;Pezizomycotina;Eurotiomycetes;Eurotiomycetidae;Eurotiales;Trichocomaceae;Talaromyces;	Dikarya;Ascomycota;Pezizomycotina;Sordariomycetes;Hypocreomycetidae;Glomerellales;Plectosphaerellaceae;mitosporic Plectosphaerellaceae;Verticillium;
	Leaf 2	Dikarya;Basidiomycota;Agaricomycotina;Tremellomycetes;Tremellales;Tremellaceae;Filobasidiella;Filobasidiella/Cryptococcus neoformans species complex;	Cryptomycota;Rozella;	Dikarya;Ascomycota;Pezizomycotina;Eurotiomycetes;Chaetothyriomycetidae;Verrucariales;Verrucariaceae;Verrucaria;	Dikarya;Ascomycota;Pezizomycotina;Leotiomycetes;Erysiphales;Erysiphaceae;Erysiphe;	Dikarya;Ascomycota;Pezizomycotina;Dothideomycetes;Pleosporomycetidae;Pleosporales;Pleosporineae;Phaeosphaeriaceae;Parastagonospora;
	Leaf 3	Dikarya;Basidiomycota;Agaricomycotina;Tremellomycetes;Tremellales;Tremellaceae;Filobasidiella;Filobasidiella/Cryptococcus neoformans species complex;	Cryptomycota;Rozella;	Dikarya;Ascomycota;Pezizomycotina;Eurotiomycetes;Chaetothyriomycetidae;Verrucariales;Verrucariaceae;Verrucaria;	Dikarya;Ascomycota;Pezizomycotina;Dothideomycetes;Pleosporomycetidae;Pleosporales;Pleosporineae;Phaeosphaeriaceae;Parastagonospora;	Dikarya;Ascomycota;Pezizomycotina;Sordariomycetes;Hypocreomycetidae;Glomerellales;Plectosphaerellaceae;mitosporic Plectosphaerellaceae;Verticillium;
	Stem 1	Dikarya;Basidiomycota;Agaricomycotina;Tremellomycetes;Tremellales;Tremellaceae;Filobasidiella;Filobasidiella/Cryptococcus neoformans species complex;	Dikarya;Ascomycota;Pezizomycotina;Eurotiomycetes;Chaetothyriomycetidae;Verrucariales;Verrucariaceae;Verrucaria;	Cryptomycota;Rozella;	Dikarya;Ascomycota;Pezizomycotina;Sordariomycetes;Hypocreomycetidae;Glomerellales;Plectosphaerellaceae;mitosporic Plectosphaerellaceae;Verticillium;	Dikarya;Ascomycota;Pezizomycotina;Dothideomycetes;Pleosporomycetidae;Pleosporales;Pleosporineae;Phaeosphaeriaceae;Parastagonospora;
	Stem 2	Dikarya;Basidiomycota;Agaricomycotina;Tremellomycetes;Tremellales;Tremellaceae;Filobasidiella;Filobasidiella/Cryptococcus neoformans species complex;	Dikarya;Ascomycota;Pezizomycotina;Eurotiomycetes;Chaetothyriomycetidae;Verrucariales;Verrucariaceae;Verrucaria;	Cryptomycota;Rozella;	Dikarya;Ascomycota;Pezizomycotina;Sordariomycetes;Hypocreomycetidae;Glomerellales;Plectosphaerellaceae;mitosporic Plectosphaerellaceae;Verticillium;	Dikarya;Ascomycota;Pezizomycotina;Dothideomycetes;Pleosporomycetidae;Pleosporales;Pleosporineae;Phaeosphaeriaceae;Parastagonospora;
	Stem 3	Dikarya;Basidiomycota;Agaricomycotina;Tremellomycetes;Tremellales;Tremellaceae;Filobasidiella;Filobasidiella/Cryptococcus neoformans species complex;	Dikarya;Ascomycota;Pezizomycotina;Dothideomycetes;Pleosporomycetidae;Pleosporales;Pleosporineae;Phaeosphaeriaceae;Parastagonospora;	Dikarya;Ascomycota;Pezizomycotina;Sordariomycetes;Hypocreomycetidae;Glomerellales;Plectosphaerellaceae;mitosporic Plectosphaerellaceae;Verticillium;	Dikarya;Ascomycota;Pezizomycotina;Eurotiomycetes;Chaetothyriomycetidae;Verrucariales;Verrucariaceae;Verrucaria;	Cryptomycota;Rozella;
	Root 1	Dikarya;Ascomycota;Pezizomycotina;Dothideomycetes;Pleosporomycetidae;Pleosporales;Pleosporineae;Phaeosphaeriaceae;Parastagonospora;	Dikarya;Basidiomycota;Agaricomycotina;Tremellomycetes;Tremellales;Tremellaceae;Filobasidiella;Filobasidiella/Cryptococcus neoformans species complex;	Dikarya;Ascomycota;Pezizomycotina;Eurotiomycetes;Eurotiomycetidae;Eurotiales;Trichocomaceae;Talaromyces;	Dikarya;Ascomycota;Saccharomycotina;Saccharomycetes;Saccharomycetales;Saccharomycetaceae;Eremothecium;	Dikarya;Ascomycota;Pezizomycotina;Eurotiomycetes;Eurotiomycetidae;Onygenales;mitosporic Onygenales;Coccidioides;
	Root 2	Dikarya;Ascomycota;Pezizomycotina;Dothideomycetes;Pleosporomycetidae;Pleosporales;Pleosporineae;Phaeosphaeriaceae;Parastagonospora;	Dikarya;Basidiomycota;Agaricomycotina;Tremellomycetes;Tremellales;Tremellaceae;Filobasidiella;Filobasidiella/Cryptococcus neoformans species complex;	Dikarya;Ascomycota;Pezizomycotina;Sordariomycetes;Sordariomycetidae;Sordariales;Chaetomiaceae;Chaetomium;	Dikarya;Ascomycota;Saccharomycotina;Saccharomycetes;Saccharomycetales;Saccharomycetaceae;Eremothecium;	Dikarya;Basidiomycota;Agaricomycotina;Agaricomycetes;Agaricomycetidae;Agaricales;Marasmiaceae;mitosporic Marasmiaceae;Moniliophthora;
	Root 3	Dikarya;Ascomycota;Pezizomycotina;Dothideomycetes;Pleosporomycetidae;Pleosporales;Pleosporineae;Phaeosphaeriaceae;Parastagonospora;	Dikarya;Basidiomycota;Agaricomycotina;Tremellomycetes;Tremellales;Tremellaceae;Filobasidiella;Filobasidiella/Cryptococcus neoformans species complex;	Dikarya;Ascomycota;Pezizomycotina;Eurotiomycetes;Eurotiomycetidae;Eurotiales;Trichocomaceae;Talaromyces;	Dikarya;Ascomycota;Saccharomycotina;Saccharomycetes;Saccharomycetales;Saccharomycetaceae;Eremothecium;	Dikarya;Ascomycota;Pezizomycotina;Sordariomycetes;Sordariomycetidae;Sordariales;Chaetomiaceae;Chaetomium;
