# Supplementary material for: Fungal communities represent the majority of root-specific transcripts in the transcriptomes of Agave plants grown in semiarid regions
Source: PeerJ. 2022 May 2;10:e13252. doi: 10.7717/peerj.13252 (PMC9070324; doi:10.7717/peerj.13252)
Supplement: Supplemental Information 6 — Classification was obtained with a BLASTp (E-value 1e−5) against the Transporter Classification Database (TCDB). We counted how many transcripts belonged to each TCDB family. [file peerj-10-13252-s006.xlsx]

## Sheet: A. fourcroydes
A. fourcroydes
ID	TCDB family	Fungi classification	Root mean expression (TPM)		TCDB	TCDB family ID	Asco count	Basidio count	All count
AF_DN51128_c6_g2	The HSP90/CDC37 (HSP90/CDC37) Family	Ascomycota	121.531		The Cation Channel-forming Heat Shock Protein-70 (Hsp70) Family	1.A.33	11	5	16
AF_DN37348_c0_g1	The Endoplasmic Reticular Retrotranslocon (ER-RT) Family	Basidiomycota	97.4102		The Endoplasmic Reticular Retrotranslocon (ER-RT) Family	3.A.16	10	5	15
AF_DN51128_c6_g1	The HSP90/CDC37 (HSP90/CDC37) Family	Basidiomycota	86.047		The ATP-binding Cassette (ABC) Superfamily	3.A.1	9	5	14
AF_DN46089_c1_g1	The Mitochondrial Carrier (MC) Family	Basidiomycota	69.1987		The Major Facilitator Superfamily (MFS)	2.A.1	8	3	11
AF_DN39498_c0_g1	The Endoplasmic Reticular Retrotranslocon (ER-RT) Family	Asco or Basidio	63.6339		The HSP90/CDC37 (HSP90/CDC37) Family	8.A.163	4	6	10
AF_DN52052_c2_g1	The Endoplasmic Reticular Retrotranslocon (ER-RT) Family	Ascomycota	48.2586		The Mitochondrial Carrier (MC) Family	2.A.29	2	6	8
AF_DN103552_c0_g1	The Cation Channel-forming Heat Shock Protein-70 (Hsp70) Family	Ascomycota	48.2402		The P-type ATPase (P-ATPase) Superfamily	3.A.3	5	1	6
AF_DN42546_c0_g1	The Cation Channel-forming Heat Shock Protein-70 (Hsp70) Family	Basidiomycota	36.5631		The Chloroplast Envelope Protein Translocase (CEPT or Tic-Toc) Family	3.A.9	3	2	5
AF_DN44188_c2_g2	The Cation Channel-forming Heat Shock Protein-70 (Hsp70) Family	Ascomycota	28.8199		The Nuclear Pore Complex (NPC) Family	1.I.1	3	2	5
AF_DN50952_c2_g1	The Nuclear mRNA Exporter (mRNA-E) Family	Ascomycota	27.9481		The Nuclear mRNA Exporter (mRNA-E) Family	3.A.18	5	0	5
AF_DN51128_c5_g1	The HSP90/CDC37 (HSP90/CDC37) Family	Basidiomycota	25.37		The H+- or Na+-translocating F-type, V-type and A-type ATPase (F-ATPase) Superfamily	3.A.2	0	5	5
AF_DN50952_c3_g1	The Nuclear mRNA Exporter (mRNA-E) Family	Ascomycota	24.8831		The Phagocyte (gp91phox) NADPH Oxidase Family	5.B.1	0	4	4
AF_DN53069_c3_g1	The Mitochondrial Carrier (MC) Family	Ascomycota	21.8797		The Type VI Symbiosis/Virulence Secretory System (T6SS) Family	3.A.23	3	0	3
AF_DN1778_c0_g1	The Endoplasmic Reticular Retrotranslocon (ER-RT) Family	Ascomycota	15.0783		The Retromer-dependent Vacuolar Protein Sorting (R-VPS) Family	9.A.63	3	0	3
AF_DN9072_c0_g1	The Endoplasmic Reticular Retrotranslocon (ER-RT) Family	Ascomycota	13.7908		The Autophagy-related Phagophore-formation Transporter (APT) Family	9.A.15	3	0	3
AF_DN83601_c0_g1	The Endoplasmic Reticular Retrotranslocon (ER-RT) Family	Ascomycota	13.5845		The 14-3-3 protein (14-3-3) Family	8.A.98	1	2	3
AF_DN93780_c0_g1	The Endoplasmic Reticular Retrotranslocon (ER-RT) Family	Basidiomycota	10.563		The Yeast Pheromone-induced Plasma Membrane Mating Cell Fusion Protein (PRM1) Family	9.B.63	3	0	3
AF_DN70646_c0_g1	The HSP90/CDC37 (HSP90/CDC37) Family	Basidiomycota	10.2315		The Drug/Metabolite Transporter (DMT) Superfamily	2.A.7	2	0	2
AF_DN29168_c0_g1	The HSP90/CDC37 (HSP90/CDC37) Family	Basidiomycota	10.1792		The Ion-translocating Microbial Rhodopsin (MR) Family	3.E.1	2	0	2
AF_DN37075_c0_g1	The Mitochondrial Carrier (MC) Family	Basidiomycota	9.8268		The H+ or Na+-translocating NADH Dehydrogenase (NDH) Family	3.D.1	1	1	2
AF_DN32257_c0_g1	The Yeast Pheromone-induced Plasma Membrane Mating Cell Fusion Protein (PRM1) Family	Ascomycota	9.67443		The Transcription-coupled TREX/TAP Nuclear mRNA Export Complex (TREX) Family	3.A.22	2	0	2
AF_DN50952_c1_g1	The Nuclear mRNA Exporter (mRNA-E) Family	Ascomycota	9.35525		The Ammonium Transporter Channel (Amt) Family	1.A.11	0	2	2
AF_DN28773_c1_g1	The Cation Channel-forming Heat Shock Protein-70 (Hsp70) Family	Ascomycota	9.27239		The Peroxisomal Protein Importer (PPI) Family	3.A.20	0	2	2
AF_DN54159_c4_g3	The Endoplasmic Reticular Retrotranslocon (ER-RT) Family	Ascomycota	8.6667		The Amino Acid-Polyamine-Organocation (APC) Family	2.A.3	1	0	1
AF_DN58592_c0_g1	The Mitochondrial Carrier (MC) Family	Basidiomycota	6.89148		The Mitochondrial Inner Membrane K+/H+ and Ca2+/H+ Exchanger (LetM1) Family	2.A.97	1	0	1
AF_DN39949_c0_g1	The Mitochondrial Carrier (MC) Family	Basidiomycota	6.42056		The Mitochondrial Inner Membrane i-AAA Protease Complex (MIMP) Familly	3.A.29	1	0	1
AF_DN40311_c0_g1	The Cation Channel-forming Heat Shock Protein-70 (Hsp70) Family	Basidiomycota	6.33078		The Nuclear t-RNA exporter (tRNA-E) Family	9.A.50	1	0	1
AF_DN23421_c0_g1	The Nuclear Pore Complex (NPC) Family	Ascomycota	5.22396		The Prenylated Rab Acceptor Protein 1 (PRA1) Family	9.A.49	1	0	1
AF_DN32697_c0_g1	The Major Facilitator Superfamily (MFS)	Basidiomycota	5.10137		The Calmodulin Calcium Binding Protein (Calmodulin) Family	8.A.82	1	0	1
AF_DN12866_c0_g1	The Nuclear Pore Complex (NPC) Family	Ascomycota	4.93102		The Acetate Uptake Transporter (AceTr) Family	2.A.96	1	0	1
AF_DN40389_c0_g1	The Major Facilitator Superfamily (MFS)	Ascomycota	4.6614		The Anion Channel-forming Bestrophin (Bestrophin) Family	1.A.46	1	0	1
AF_DN84274_c0_g1	The Nuclear mRNA Exporter (mRNA-E) Family	Ascomycota	4.62162		The Ca2+:Cation Antiporter (CaCA) Family	2.A.19	1	0	1
AF_DN16804_c0_g1	The HSP90/CDC37 (HSP90/CDC37) Family	Ascomycota	4.20698		The Endosomal Sorting Complexes Required for Transport III (ESCRT-III) Family	3.A.31	0	1	1
AF_DN27224_c0_g1	The HSP90/CDC37 (HSP90/CDC37) Family	Basidiomycota	4.17087		The G-Protein αβγ Complex (GPC) Family	8.A.92	0	1	1
AF_DN18248_c0_g1	The Ammonium Transporter Channel (Amt) Family	Basidiomycota	4.15223
AF_DN7440_c0_g1	The HSP90/CDC37 (HSP90/CDC37) Family	Ascomycota	4.10316
AF_DN26909_c0_g1	The 14-3-3 protein (14-3-3) Family	Basidiomycota	4.04912
AF_DN99466_c0_g1	The Nuclear Pore Complex (NPC) Family	Ascomycota	4.01214
AF_DN40328_c0_g1	The Major Facilitator Superfamily (MFS)	Ascomycota	3.94612
AF_DN85793_c0_g1	The Peroxisomal Protein Importer (PPI) Family	Basidiomycota	3.91447
AF_DN83539_c0_g1	The Nuclear Pore Complex (NPC) Family	Basidiomycota	3.7836
AF_DN65425_c0_g1	The H+- or Na+-translocating F-type, V-type and A-type ATPase (F-ATPase) Superfamily	Basidiomycota	3.69191
AF_DN23232_c0_g1	The 14-3-3 protein (14-3-3) Family	Ascomycota	3.6836
AF_DN24779_c1_g1	The Cation Channel-forming Heat Shock Protein-70 (Hsp70) Family	Ascomycota	3.55462
AF_DN80688_c0_g1	The Calmodulin Calcium Binding Protein (Calmodulin) Family	Ascomycota	3.36575
AF_DN32718_c1_g1	The P-type ATPase (P-ATPase) Superfamily	Basidiomycota	3.32014
AF_DN76953_c0_g1	The Type VI Symbiosis/Virulence Secretory System (T6SS) Family	Ascomycota	3.30183
AF_DN70377_c0_g1	The Nuclear mRNA Exporter (mRNA-E) Family	Ascomycota	3.25586
AF_DN23499_c0_g1	The Phagocyte (gp91phox) NADPH Oxidase Family	Basidiomycota	3.25406
AF_DN67111_c0_g1	The ATP-binding Cassette (ABC) Superfamily	Basidiomycota	3.16109
AF_DN54899_c0_g1	The ATP-binding Cassette (ABC) Superfamily	Basidiomycota	3.15793
AF_DN1363_c0_g1	The Cation Channel-forming Heat Shock Protein-70 (Hsp70) Family	Basidiomycota	3.14727
AF_DN18256_c1_g1	The Autophagy-related Phagophore-formation Transporter (APT) Family	Ascomycota	3.12101
AF_DN93429_c0_g1	The Chloroplast Envelope Protein Translocase (CEPT or Tic-Toc) Family	Basidiomycota	3.11595
AF_DN25470_c0_g1	The Mitochondrial Carrier (MC) Family	Basidiomycota	3.1143
AF_DN69572_c0_g1	The Chloroplast Envelope Protein Translocase (CEPT or Tic-Toc) Family	Basidiomycota	3.07749
AF_DN75709_c0_g1	The HSP90/CDC37 (HSP90/CDC37) Family	Basidiomycota	3.06044
AF_DN86788_c0_g1	The Nuclear t-RNA exporter (tRNA-E) Family	Ascomycota	3.0201
AF_DN71645_c0_g1	The Type VI Symbiosis/Virulence Secretory System (T6SS) Family	Ascomycota	2.97047
AF_DN55439_c0_g1	The Endoplasmic Reticular Retrotranslocon (ER-RT) Family	Basidiomycota	2.93939
AF_DN56624_c0_g1	The Ammonium Transporter Channel (Amt) Family	Basidiomycota	2.93755
AF_DN94100_c0_g1	The Autophagy-related Phagophore-formation Transporter (APT) Family	Ascomycota	2.91703
AF_DN79540_c0_g1	The H+- or Na+-translocating F-type, V-type and A-type ATPase (F-ATPase) Superfamily	Basidiomycota	2.91284
AF_DN72388_c0_g1	The Phagocyte (gp91phox) NADPH Oxidase Family	Basidiomycota	2.90586
AF_DN96998_c0_g1	The Ion-translocating Microbial Rhodopsin (MR) Family	Ascomycota	2.90547
AF_DN8522_c0_g1	The Cation Channel-forming Heat Shock Protein-70 (Hsp70) Family	Ascomycota	2.90046
AF_DN15445_c0_g1	The Peroxisomal Protein Importer (PPI) Family	Basidiomycota	2.87169
AF_DN36099_c1_g1	The Type VI Symbiosis/Virulence Secretory System (T6SS) Family	Ascomycota	2.84543
AF_DN74641_c0_g1	The ATP-binding Cassette (ABC) Superfamily	Ascomycota	2.82197
AF_DN96335_c0_g1	The Mitochondrial Inner Membrane K+/H+ and Ca2+/H+ Exchanger (LetM1) Family	Ascomycota	2.81799
AF_DN58230_c0_g1	The H+- or Na+-translocating F-type, V-type and A-type ATPase (F-ATPase) Superfamily	Basidiomycota	2.76554
AF_DN54739_c0_g1	The H+- or Na+-translocating F-type, V-type and A-type ATPase (F-ATPase) Superfamily	Basidiomycota	2.765
AF_DN99837_c0_g1	The Endosomal Sorting Complexes Required for Transport III (ESCRT-III) Family	Basidiomycota	2.74225
AF_DN55860_c0_g1	The Endoplasmic Reticular Retrotranslocon (ER-RT) Family	Ascomycota	2.72578
AF_DN83853_c0_g1	The H+ or Na+-translocating NADH Dehydrogenase (NDH) Family	Basidiomycota	2.71725
AF_DN22568_c0_g1	The Cation Channel-forming Heat Shock Protein-70 (Hsp70) Family	Ascomycota	2.68897
AF_DN82930_c0_g1	The Autophagy-related Phagophore-formation Transporter (APT) Family	Ascomycota	2.68598
AF_DN90524_c0_g1	The Mitochondrial Carrier (MC) Family	Basidiomycota	2.68595
AF_DN108125_c0_g1	The Major Facilitator Superfamily (MFS)	Ascomycota	2.68551
AF_DN106480_c0_g1	The Cation Channel-forming Heat Shock Protein-70 (Hsp70) Family	Basidiomycota	2.67481
AF_DN84899_c0_g1	The HSP90/CDC37 (HSP90/CDC37) Family	Ascomycota	2.6748
AF_DN3419_c0_g1	The ATP-binding Cassette (ABC) Superfamily	Basidiomycota	2.54254
AF_DN58820_c0_g1	The Major Facilitator Superfamily (MFS)	Basidiomycota	2.50957
AF_DN17258_c0_g1	The Cation Channel-forming Heat Shock Protein-70 (Hsp70) Family	Basidiomycota	2.45286
AF_DN106692_c0_g1	The Endoplasmic Reticular Retrotranslocon (ER-RT) Family	Ascomycota	2.43983
AF_DN74716_c0_g1	The ATP-binding Cassette (ABC) Superfamily	Basidiomycota	2.43888
AF_DN88045_c0_g1	The P-type ATPase (P-ATPase) Superfamily	Ascomycota	2.37402
AF_DN84121_c0_g1	The Retromer-dependent Vacuolar Protein Sorting (R-VPS) Family	Ascomycota	2.35564
AF_DN86259_c0_g1	The Nuclear Pore Complex (NPC) Family	Basidiomycota	2.34356
AF_DN86179_c0_g1	The Endoplasmic Reticular Retrotranslocon (ER-RT) Family	Ascomycota	2.33092
AF_DN1380_c0_g1	The Endoplasmic Reticular Retrotranslocon (ER-RT) Family	Ascomycota	2.30328
AF_DN62060_c0_g1	The ATP-binding Cassette (ABC) Superfamily	Ascomycota	2.27147
AF_DN93106_c0_g1	The Transcription-coupled TREX/TAP Nuclear mRNA Export Complex (TREX) Family	Ascomycota	2.26465
AF_DN101053_c0_g1	The P-type ATPase (P-ATPase) Superfamily	Ascomycota	2.23675
AF_DN58518_c0_g1	The Chloroplast Envelope Protein Translocase (CEPT or Tic-Toc) Family	Ascomycota	2.23099
AF_DN26781_c0_g1	The Cation Channel-forming Heat Shock Protein-70 (Hsp70) Family	Ascomycota	2.21901
AF_DN93637_c0_g1	The Amino Acid-Polyamine-Organocation (APC) Family	Ascomycota	2.20588
AF_DN96449_c0_g1	The Endoplasmic Reticular Retrotranslocon (ER-RT) Family	Basidiomycota	2.19491
AF_DN79068_c0_g1	The Endoplasmic Reticular Retrotranslocon (ER-RT) Family	Basidiomycota	2.18466
AF_DN63561_c0_g1	The Acetate Uptake Transporter (AceTr) Family	Ascomycota	2.12673
AF_DN106012_c0_g1	The Chloroplast Envelope Protein Translocase (CEPT or Tic-Toc) Family	Ascomycota	2.09351
AF_DN56051_c0_g1	The H+- or Na+-translocating F-type, V-type and A-type ATPase (F-ATPase) Superfamily	Basidiomycota	2.08328
AF_DN109014_c0_g1	The Transcription-coupled TREX/TAP Nuclear mRNA Export Complex (TREX) Family	Ascomycota	2.06541
AF_DN16898_c0_g1	The Retromer-dependent Vacuolar Protein Sorting (R-VPS) Family	Ascomycota	2.0436
AF_DN67221_c0_g1	The Phagocyte (gp91phox) NADPH Oxidase Family	Basidiomycota	2.04196
AF_DN40389_c1_g1	The Major Facilitator Superfamily (MFS)	Ascomycota	2.02619
AF_DN98762_c0_g1	The Major Facilitator Superfamily (MFS)	Ascomycota	2.00784
AF_DN95355_c0_g1	The ATP-binding Cassette (ABC) Superfamily	Ascomycota	1.99527
AF_DN66199_c0_g1	The Endoplasmic Reticular Retrotranslocon (ER-RT) Family	Ascomycota	1.96315
AF_DN86966_c0_g1	The Ion-translocating Microbial Rhodopsin (MR) Family	Ascomycota	1.95922
AF_DN73989_c0_g1	The Ca2+:Cation Antiporter (CaCA) Family	Ascomycota	1.93028
AF_DN103131_c0_g1	The Anion Channel-forming Bestrophin (Bestrophin) Family	Ascomycota	1.87674
AF_DN86410_c0_g1	The Retromer-dependent Vacuolar Protein Sorting (R-VPS) Family	Ascomycota	1.8721
AF_DN82765_c0_g1	The Major Facilitator Superfamily (MFS)	Ascomycota	1.86919
AF_DN55382_c0_g1	The 14-3-3 protein (14-3-3) Family	Basidiomycota	1.85261
AF_DN81845_c0_g1	The Mitochondrial Inner Membrane i-AAA Protease Complex (MIMP) Familly	Ascomycota	1.83017
AF_DN82896_c0_g1	The Cation Channel-forming Heat Shock Protein-70 (Hsp70) Family	Ascomycota	1.8271
AF_DN104373_c0_g1	The Major Facilitator Superfamily (MFS)	Ascomycota	1.825
AF_DN106790_c0_g1	The Major Facilitator Superfamily (MFS)	Basidiomycota	1.82271
AF_DN109326_c0_g1	The H+ or Na+-translocating NADH Dehydrogenase (NDH) Family	Ascomycota	1.81793
AF_DN63274_c0_g1	The H+- or Na+-translocating F-type, V-type and A-type ATPase (F-ATPase) Superfamily	Other fungi	1.77886
AF_DN86297_c0_g1	The Yeast Pheromone-induced Plasma Membrane Mating Cell Fusion Protein (PRM1) Family	Ascomycota	1.74642
AF_DN109577_c0_g1	The Cation Channel-forming Heat Shock Protein-70 (Hsp70) Family	Ascomycota	1.71373
AF_DN64981_c0_g1	The Drug/Metabolite Transporter (DMT) Superfamily	Ascomycota	1.66784
AF_DN95965_c0_g1	The ATP-binding Cassette (ABC) Superfamily	Ascomycota	1.65662
AF_DN56111_c0_g1	The ATP-binding Cassette (ABC) Superfamily	Ascomycota	1.65156
AF_DN107580_c0_g1	The Phagocyte (gp91phox) NADPH Oxidase Family	Basidiomycota	1.62862
AF_DN61344_c0_g1	The Cation Channel-forming Heat Shock Protein-70 (Hsp70) Family	Ascomycota	1.62632
AF_DN77834_c0_g1	The ATP-binding Cassette (ABC) Superfamily	Ascomycota	1.62228
AF_DN78767_c0_g1	The P-type ATPase (P-ATPase) Superfamily	Ascomycota	1.60772
AF_DN88579_c0_g1	The Cation Channel-forming Heat Shock Protein-70 (Hsp70) Family	Ascomycota	1.57782
AF_DN76732_c0_g1	The ATP-binding Cassette (ABC) Superfamily	Ascomycota	1.55273
AF_DN64367_c0_g1	The ATP-binding Cassette (ABC) Superfamily	Basidiomycota	1.52587
AF_DN90977_c0_g1	The Yeast Pheromone-induced Plasma Membrane Mating Cell Fusion Protein (PRM1) Family	Ascomycota	1.50388
AF_DN96715_c0_g1	The Mitochondrial Carrier (MC) Family	Ascomycota	1.49886
AF_DN57881_c0_g1	The ATP-binding Cassette (ABC) Superfamily	Ascomycota	1.49823
AF_DN82583_c0_g1	The Major Facilitator Superfamily (MFS)	Ascomycota	1.47611
AF_DN78742_c0_g1	The P-type ATPase (P-ATPase) Superfamily	Ascomycota	1.42417
AF_DN55302_c0_g1	The G-Protein αβγ Complex (GPC) Family	Basidiomycota	1.33468
AF_DN79216_c0_g1	The Prenylated Rab Acceptor Protein 1 (PRA1) Family	Ascomycota	1.27697
AF_DN95589_c0_g1	The Chloroplast Envelope Protein Translocase (CEPT or Tic-Toc) Family	Ascomycota	1.26332
AF_DN65770_c0_g1	The ATP-binding Cassette (ABC) Superfamily	Ascomycota	1.22411
AF_DN76523_c0_g1	The Drug/Metabolite Transporter (DMT) Superfamily	Ascomycota	1.02883
AF_DN91936_c0_g1	The P-type ATPase (P-ATPase) Superfamily	Ascomycota	1.01914
AF_DN87294_c0_g1	The Endoplasmic Reticular Retrotranslocon (ER-RT) Family	Asco or Basidio	0.947994

## Sheet: A. sisalana
A. sisalana
ID	TCDB family	Fungi classification	Root mean expression (TPM)		TCDB	TCDB family ID	Asco count	Basidio count	All count
AS_DN53864_c3_g1	The HSP90/CDC37 (HSP90/CDC37) Family	Ascomycota	99.5239		The Cation Channel-forming Heat Shock Protein-70 (Hsp70) Family	1.A.33	17	6	23
AS_DN59592_c8_g2	The Endoplasmic Reticular Retrotranslocon (ER-RT) Family	Ascomycota	99.4984		The Endoplasmic Reticular Retrotranslocon (ER-RT) Family	3.A.16	14	4	18
AS_DN51359_c2_g1	The Endoplasmic Reticular Retrotranslocon (ER-RT) Family	Ascomycota	71.3344		The Major Facilitator Superfamily (MFS)	2.A.1	16	0	16
AS_DN53419_c0_g2	The Cation Channel-forming Heat Shock Protein-70 (Hsp70) Family	Ascomycota	67.3109		The H+- or Na+-translocating F-type, V-type and A-type ATPase (F-ATPase) Superfamily	3.A.2	10	6	16
AS_DN53419_c0_g3	The Cation Channel-forming Heat Shock Protein-70 (Hsp70) Family	Ascomycota	56.72		The ATP-binding Cassette (ABC) Superfamily	3.A.1	9	3	12
AS_DN50667_c0_g1	The Mitochondrial Carrier (MC) Family	Ascomycota	47.8654		The Nuclear Pore Complex (NPC) Family	1.I.1	6	3	9
AS_DN54411_c1_g1	The Mitochondrial Carrier (MC) Family	Ascomycota	28.9758		The Chloroplast Envelope Protein Translocase (CEPT or Tic-Toc) Family	3.A.9	6	1	7
AS_DN30106_c0_g1	The Cation Channel-forming Heat Shock Protein-70 (Hsp70) Family	Ascomycota	24.0395		The HSP90/CDC37 (HSP90/CDC37) Family	8.A.163	2	4	6
AS_DN48395_c0_g1	The Cation Channel-forming Heat Shock Protein-70 (Hsp70) Family	Basidiomycota	23.7224		The H+ or Na+-translocating NADH Dehydrogenase (NDH) Family	3.D.1	2	4	6
AS_DN56192_c3_g1	The Nuclear mRNA Exporter (mRNA-E) Family	Ascomycota	21.973		The Mitochondrial Carrier (MC) Family	2.A.29	4	2	6
AS_DN52190_c1_g1	The HSP90/CDC37 (HSP90/CDC37) Family	Ascomycota	16.9335		The Drug/Metabolite Transporter (DMT) Superfamily	2.A.7	5	0	5
AS_DN4567_c0_g1	The H+ or Na+-translocating NADH Dehydrogenase (NDH) Family	Basidiomycota	11.5208		The Nuclear mRNA Exporter (mRNA-E) Family	3.A.18	5	0	5
AS_DN22107_c0_g1	The HSP90/CDC37 (HSP90/CDC37) Family	Basidiomycota	11.4312		The Transcription-coupled TREX/TAP Nuclear mRNA Export Complex (TREX) Family	3.A.22	5	0	5
AS_DN37204_c0_g1	The Endoplasmic Reticular Retrotranslocon (ER-RT) Family	Ascomycota	8.522		The 14-3-3 protein (14-3-3) Family	8.A.98	2	2	4
AS_DN5444_c0_g1	The Endoplasmic Reticular Retrotranslocon (ER-RT) Family	Ascomycota	7.77539		The Calmodulin Calcium Binding Protein (Calmodulin) Family	8.A.82	3	1	4
AS_DN56192_c2_g1	The Nuclear mRNA Exporter (mRNA-E) Family	Ascomycota	7.21111		The Phagocyte (gp91phox) NADPH Oxidase Family	5.B.1	1	2	3
AS_DN36512_c0_g1	The Major Facilitator Superfamily (MFS)	Ascomycota	5.88497		The Ammonium Transporter Channel (Amt) Family	1.A.11	2	1	3
AS_DN46360_c0_g1	The Major Facilitator Superfamily (MFS)	Ascomycota	5.76398		The Autophagy-related Phagophore-formation Transporter (APT) Family	9.A.15	2	1	3
AS_DN49138_c0_g1	The Major Facilitator Superfamily (MFS)	Ascomycota	5.55856		The P-type ATPase (P-ATPase) Superfamily	3.A.3	3	0	3
AS_DN29582_c0_g1	The Major Facilitator Superfamily (MFS)	Ascomycota	5.43737		The Nuclear t-RNA exporter (tRNA-E) Family	9.A.50	3	0	3
AS_DN31245_c0_g1	The Nuclear mRNA Exporter (mRNA-E) Family	Ascomycota	4.97862		The Peroxisomal Protein Importer (PPI) Family	3.A.20	2	1	3
AS_DN48061_c0_g1	The Peroxisomal Protein Importer (PPI) Family	Ascomycota	4.96537		The Anion Channel-forming Bestrophin (Bestrophin) Family	1.A.46	3	0	3
AS_DN38902_c0_g1	The HSP90/CDC37 (HSP90/CDC37) Family	Basidiomycota	4.92717		The Ubiquitin-related Protein Degradation (UPD) Family	8.A.52	3	0	3
AS_DN22132_c0_g1	The 14-3-3 protein (14-3-3) Family	Ascomycota	4.91688		The Ion-translocating Microbial Rhodopsin (MR) Family	3.E.1	2	0	2
AS_DN36058_c0_g1	The Endoplasmic Reticular Retrotranslocon (ER-RT) Family	Basidiomycota	4.79837		The Nucleobase:Cation Symporter-1 (NCS1) Family	2.A.39	2	0	2
AS_DN46640_c0_g1	The P-type ATPase (P-ATPase) Superfamily	Ascomycota	4.78967		The Proton-translocating Quinol:Cytochrome c Reductase (QCR) Superfamily	3.D.3	2	0	2
AS_DN10845_c0_g1	The Autophagy-related Phagophore-formation Transporter (APT) Family	Basidiomycota	4.72486		The Mitochondrial and Plastid Porin (MPP) Family	1.B.8	2	0	2
AS_DN35023_c0_g1	The Major Facilitator Superfamily (MFS)	Ascomycota	4.40703		The Putative Vectorial Glycosyl Polymerization (VGP) Family	4.D.1	2	0	2
AS_DN277_c0_g1	The Transcription-coupled TREX/TAP Nuclear mRNA Export Complex (TREX) Family	Ascomycota	4.36951		The Endosomal Sorting Complexes Required for Transport III (ESCRT-III) Family	3.A.31	1	1	2
AS_DN108979_c0_g1	The Endoplasmic Reticular Retrotranslocon (ER-RT) Family	Ascomycota	4.27724		The Amino Acid-Polyamine-Organocation (APC) Family	2.A.3	1	1	2
AS_DN106517_c0_g1	The H+- or Na+-translocating F-type, V-type and A-type ATPase (F-ATPase) Superfamily	Ascomycota	4.26741		The Ca2+:Cation Antiporter (CaCA) Family	2.A.19	2	0	2
AS_DN30309_c0_g1	The Chloroplast Envelope Protein Translocase (CEPT or Tic-Toc) Family	Ascomycota	4.18344		The Endophilin (Endophilin) Family	8.A.34	1	0	1
AS_DN35383_c0_g1	The Nucleobase:Cation Symporter-1 (NCS1) Family	Ascomycota	4.15152		The Glycan Synthase, Fks1 (Fks1) Family	9.B.119	1	0	1
AS_DN62892_c0_g1	The Major Facilitator Superfamily (MFS)	Ascomycota	4.13184		The Steroid 5α-reductase/Lamin B Receptor (LBR) Family	9.B.115	1	0	1
AS_DN68565_c0_g1	The Cation Channel-forming Heat Shock Protein-70 (Hsp70) Family	Basidiomycota	4.11826		The Heterokaryon Incompatibility Prion/Amyloid Protein (HET-s) Family	1.C.104	1	0	1
AS_DN20738_c0_g1	The Nuclear Pore Complex (NPC) Family	Basidiomycota	4.10841		The TMS Recognition/Insertion Complex (TRC) Family	3.A.19	1	0	1
AS_DN107539_c0_g1	The 14-3-3 protein (14-3-3) Family	Basidiomycota	3.95574		The Peroxiredoxin Heme-binding Protein, Tpx1 (Tpx1) Family	8.A.147	1	0	1
AS_DN50820_c0_g1	The Anion Channel-forming Bestrophin (Bestrophin) Family	Ascomycota	3.89603		The 5'-AMP-activated protein kinase (AMPK) Family	8.A.104	1	0	1
AS_DN40658_c0_g1	The Nuclear t-RNA exporter (tRNA-E) Family	Ascomycota	3.84381		The Retromer-dependent Vacuolar Protein Sorting (R-VPS) Family	9.A.63	1	0	1
AS_DN50667_c1_g1	The Mitochondrial Carrier (MC) Family	Basidiomycota	3.82081		The Prokaryotic Succinate Dehydrogenase (SDH) Family	3.D.10	1	0	1
AS_DN115499_c0_g1	The Proton-translocating Quinol:Cytochrome c Reductase (QCR) Superfamily	Ascomycota	3.79598		The Mitochondrial Inner Membrane i-AAA Protease Complex (MIMP) Familly	3.A.29	1	0	1
AS_DN127414_c0_g1	The H+- or Na+-translocating F-type, V-type and A-type ATPase (F-ATPase) Superfamily	Ascomycota	3.786		The Yeast Pheromone-induced Plasma Membrane Mating Cell Fusion Protein (PRM1) Family	9.B.63	1	0	1
AS_DN9080_c0_g1	The H+- or Na+-translocating F-type, V-type and A-type ATPase (F-ATPase) Superfamily	Basidiomycota	3.69641		The (Bacillus Phage phi29) Portal Protein 6 (PPP6) Family	1.W.6	1	0	1
AS_DN90990_c0_g1	The Nuclear t-RNA exporter (tRNA-E) Family	Ascomycota	3.66809		The Cation Diffusion Facilitator (CDF) Family	2.A.4	0	1	1
AS_DN13144_c0_g1	The Endosomal Sorting Complexes Required for Transport III (ESCRT-III) Family	Basidiomycota	3.63586		The Death Effector Domain A (DedA) Family	9.B.27	0	1	1
AS_DN53419_c1_g1	The Cation Channel-forming Heat Shock Protein-70 (Hsp70) Family	Ascomycota	3.62567		The G-Protein αβγ Complex (GPC) Family	8.A.92	0	1	1
AS_DN27757_c0_g1	The Major Facilitator Superfamily (MFS)	Ascomycota	3.55339		The Calcium-dependent Chloride Channel (Ca-ClC) Family	1.A.17	0	1	1
AS_DN56192_c4_g1	The Nuclear mRNA Exporter (mRNA-E) Family	Ascomycota	3.53971		The Endoplasmic Reticulum Surface Retrieval Pathway (ER-SURF)	3.A.30	0	1	1
AS_DN12140_c0_g1	The Cation Channel-forming Heat Shock Protein-70 (Hsp70) Family	Ascomycota	3.49699		The Small Nuclear RNA Exporter (snRNA-E)	9.A.60	0	1	1
AS_DN7331_c0_g1	The Calmodulin Calcium Binding Protein (Calmodulin) Family	Ascomycota	3.43257		The Voltage-gated K+ Channel β-subunit (Kvβ) Family	8.A.5	0	1	1
AS_DN26895_c0_g1	The ATP-binding Cassette (ABC) Superfamily	Ascomycota	3.41822
AS_DN37213_c0_g1	The Endoplasmic Reticular Retrotranslocon (ER-RT) Family	Ascomycota	3.40078
AS_DN134439_c0_g1	The Cation Channel-forming Heat Shock Protein-70 (Hsp70) Family	Basidiomycota	3.39458
AS_DN129009_c0_g1	The H+- or Na+-translocating F-type, V-type and A-type ATPase (F-ATPase) Superfamily	Basidiomycota	3.24898
AS_DN13420_c0_g1	The H+- or Na+-translocating F-type, V-type and A-type ATPase (F-ATPase) Superfamily	Basidiomycota	3.24891
AS_DN103425_c0_g1	The HSP90/CDC37 (HSP90/CDC37) Family	Basidiomycota	3.1537
AS_DN23846_c0_g1	The H+- or Na+-translocating F-type, V-type and A-type ATPase (F-ATPase) Superfamily	Ascomycota	3.11822
AS_DN127488_c1_g1	The Autophagy-related Phagophore-formation Transporter (APT) Family	Ascomycota	3.08953
AS_DN102740_c0_g1	The H+- or Na+-translocating F-type, V-type and A-type ATPase (F-ATPase) Superfamily	Ascomycota	3.05522
AS_DN135299_c0_g1	The Cation Channel-forming Heat Shock Protein-70 (Hsp70) Family	Ascomycota	2.99692
AS_DN37498_c0_g1	The Endoplasmic Reticular Retrotranslocon (ER-RT) Family	Ascomycota	2.9904
AS_DN89330_c0_g1	The Nuclear Pore Complex (NPC) Family	Basidiomycota	2.98666
AS_DN36688_c0_g1	The Endoplasmic Reticulum Surface Retrieval Pathway (ER-SURF)	Basidiomycota	2.92289
AS_DN35352_c0_g1	The Amino Acid-Polyamine-Organocation (APC) Family	Ascomycota	2.90179
AS_DN43550_c3_g1	The Cation Channel-forming Heat Shock Protein-70 (Hsp70) Family	Ascomycota	2.84565
AS_DN117960_c0_g1	The H+- or Na+-translocating F-type, V-type and A-type ATPase (F-ATPase) Superfamily	Ascomycota	2.82203
AS_DN100375_c0_g1	The Phagocyte (gp91phox) NADPH Oxidase Family	Basidiomycota	2.79544
AS_DN75928_c0_g1	The Peroxisomal Protein Importer (PPI) Family	Basidiomycota	2.79301
AS_DN13148_c0_g1	The HSP90/CDC37 (HSP90/CDC37) Family	Basidiomycota	2.75127
AS_DN73904_c0_g1	The Nuclear t-RNA exporter (tRNA-E) Family	Ascomycota	2.7261
AS_DN33524_c0_g1	The Chloroplast Envelope Protein Translocase (CEPT or Tic-Toc) Family	Basidiomycota	2.7257
AS_DN65830_c0_g1	The H+- or Na+-translocating F-type, V-type and A-type ATPase (F-ATPase) Superfamily	Ascomycota	2.70679
AS_DN76072_c0_g1	The Autophagy-related Phagophore-formation Transporter (APT) Family	Ascomycota	2.69314
AS_DN95460_c0_g1	The Cation Channel-forming Heat Shock Protein-70 (Hsp70) Family	Basidiomycota	2.67632
AS_DN134487_c0_g1	The Ubiquitin-related Protein Degradation (UPD) Family	Ascomycota	2.66178
AS_DN119701_c0_g1	The Cation Diffusion Facilitator (CDF) Family	Basidiomycota	2.62168
AS_DN101454_c0_g1	The Drug/Metabolite Transporter (DMT) Superfamily	Ascomycota	2.59608
AS_DN110231_c0_g1	The Cation Channel-forming Heat Shock Protein-70 (Hsp70) Family	Ascomycota	2.56625
AS_DN73499_c0_g1	The Major Facilitator Superfamily (MFS)	Ascomycota	2.56056
AS_DN95220_c0_g1	The Phagocyte (gp91phox) NADPH Oxidase Family	Basidiomycota	2.55704
AS_DN128879_c0_g1	The Death Effector Domain A (DedA) Family	Basidiomycota	2.55164
AS_DN37376_c0_g1	The H+- or Na+-translocating F-type, V-type and A-type ATPase (F-ATPase) Superfamily	Basidiomycota	2.53877
AS_DN116521_c0_g1	The 14-3-3 protein (14-3-3) Family	Basidiomycota	2.4644
AS_DN76513_c0_g1	The H+ or Na+-translocating NADH Dehydrogenase (NDH) Family	Ascomycota	2.45319
AS_DN21242_c0_g1	The Anion Channel-forming Bestrophin (Bestrophin) Family	Ascomycota	2.42252
AS_DN96310_c0_g1	The Nuclear Pore Complex (NPC) Family	Ascomycota	2.42115
AS_DN38249_c0_g1	The Major Facilitator Superfamily (MFS)	Ascomycota	2.41557
AS_DN70335_c0_g1	The Cation Channel-forming Heat Shock Protein-70 (Hsp70) Family	Ascomycota	2.40562
AS_DN1316_c0_g1	The Major Facilitator Superfamily (MFS)	Ascomycota	2.38646
AS_DN136485_c0_g1	The Major Facilitator Superfamily (MFS)	Ascomycota	2.37622
AS_DN1458_c0_g1	The ATP-binding Cassette (ABC) Superfamily	Basidiomycota	2.36856
AS_DN103801_c0_g1	The Endoplasmic Reticular Retrotranslocon (ER-RT) Family	Basidiomycota	2.35569
AS_DN114198_c1_g1	The Endoplasmic Reticular Retrotranslocon (ER-RT) Family	Ascomycota	2.32506
AS_DN62378_c0_g1	The H+- or Na+-translocating F-type, V-type and A-type ATPase (F-ATPase) Superfamily	Ascomycota	2.32231
AS_DN17129_c0_g1	The Cation Channel-forming Heat Shock Protein-70 (Hsp70) Family	Ascomycota	2.27007
AS_DN107606_c0_g1	The Cation Channel-forming Heat Shock Protein-70 (Hsp70) Family	Ascomycota	2.24026
AS_DN22511_c0_g1	The Endoplasmic Reticular Retrotranslocon (ER-RT) Family	Ascomycota	2.23326
AS_DN101882_c0_g1	The Mitochondrial and Plastid Porin (MPP) Family	Ascomycota	2.22277
AS_DN103542_c0_g1	The H+- or Na+-translocating F-type, V-type and A-type ATPase (F-ATPase) Superfamily	Ascomycota	2.22195
AS_DN26105_c0_g1	The Nuclear Pore Complex (NPC) Family	Ascomycota	2.21951
AS_DN132349_c0_g1	The Prokaryotic Succinate Dehydrogenase (SDH) Family	Ascomycota	2.21133
AS_DN116456_c0_g1	The H+- or Na+-translocating F-type, V-type and A-type ATPase (F-ATPase) Superfamily	Ascomycota	2.19707
AS_DN121941_c0_g1	The Peroxiredoxin Heme-binding Protein, Tpx1 (Tpx1) Family	Ascomycota	2.18382
AS_DN17417_c0_g1	The Anion Channel-forming Bestrophin (Bestrophin) Family	Ascomycota	2.18114
AS_DN116204_c0_g1	The ATP-binding Cassette (ABC) Superfamily	Basidiomycota	2.17481
AS_DN125545_c0_g1	The Nuclear mRNA Exporter (mRNA-E) Family	Ascomycota	2.16025
AS_DN42251_c0_g1	The Nuclear Pore Complex (NPC) Family	Ascomycota	2.1482
AS_DN67990_c0_g1	The Nuclear Pore Complex (NPC) Family	Ascomycota	2.13144
AS_DN100159_c0_g1	The ATP-binding Cassette (ABC) Superfamily	Ascomycota	2.09663
AS_DN114449_c0_g1	The Ammonium Transporter Channel (Amt) Family	Ascomycota	2.07185
AS_DN12833_c0_g1	The Cation Channel-forming Heat Shock Protein-70 (Hsp70) Family	Ascomycota	2.06
AS_DN114961_c0_g1	The Drug/Metabolite Transporter (DMT) Superfamily	Ascomycota	2.03793
AS_DN122702_c0_g1	The Major Facilitator Superfamily (MFS)	Ascomycota	2.03431
AS_DN14755_c0_g1	The Transcription-coupled TREX/TAP Nuclear mRNA Export Complex (TREX) Family	Ascomycota	2.01603
AS_DN24772_c0_g1	The Proton-translocating Quinol:Cytochrome c Reductase (QCR) Superfamily	Ascomycota	1.99745
AS_DN84423_c0_g1	The Yeast Pheromone-induced Plasma Membrane Mating Cell Fusion Protein (PRM1) Family	Ascomycota	1.9831
AS_DN89872_c0_g1	The 14-3-3 protein (14-3-3) Family	Ascomycota	1.97493
AS_DN18152_c0_g1	The Endoplasmic Reticular Retrotranslocon (ER-RT) Family	Basidiomycota	1.96409
AS_DN31710_c1_g1	The Nuclear Pore Complex (NPC) Family	Ascomycota	1.96202
AS_DN105451_c0_g1	The Endosomal Sorting Complexes Required for Transport III (ESCRT-III) Family	Ascomycota	1.92079
AS_DN1221_c0_g1	The Ca2+:Cation Antiporter (CaCA) Family	Ascomycota	1.89764
AS_DN124628_c0_g1	The Endoplasmic Reticular Retrotranslocon (ER-RT) Family	Ascomycota	1.89638
AS_DN90362_c0_g1	The Steroid 5α-reductase/Lamin B Receptor (LBR) Family	Ascomycota	1.87157
AS_DN64731_c0_g1	The Cation Channel-forming Heat Shock Protein-70 (Hsp70) Family	Ascomycota	1.87107
AS_DN121641_c0_g1	The H+ or Na+-translocating NADH Dehydrogenase (NDH) Family	Basidiomycota	1.86029
AS_DN30509_c0_g1	The Cation Channel-forming Heat Shock Protein-70 (Hsp70) Family	Basidiomycota	1.85639
AS_DN137969_c0_g1	The Endoplasmic Reticular Retrotranslocon (ER-RT) Family	Ascomycota	1.85616
AS_DN129450_c0_g1	The (Bacillus Phage phi29) Portal Protein 6 (PPP6) Family	Ascomycota	1.82487
AS_DN113882_c0_g1	The Ca2+:Cation Antiporter (CaCA) Family	Ascomycota	1.82444
AS_DN99392_c0_g1	The ATP-binding Cassette (ABC) Superfamily	Ascomycota	1.82405
AS_DN64661_c0_g1	The Mitochondrial Carrier (MC) Family	Ascomycota	1.81758
AS_DN92365_c0_g1	The Cation Channel-forming Heat Shock Protein-70 (Hsp70) Family	Basidiomycota	1.81721
AS_DN123700_c0_g1	The Major Facilitator Superfamily (MFS)	Ascomycota	1.79154
AS_DN21889_c0_g1	The Calmodulin Calcium Binding Protein (Calmodulin) Family	Basidiomycota	1.79145
AS_DN63997_c0_g1	The ATP-binding Cassette (ABC) Superfamily	Ascomycota	1.77447
AS_DN92606_c0_g1	The P-type ATPase (P-ATPase) Superfamily	Ascomycota	1.76249
AS_DN140444_c0_g1	The Small Nuclear RNA Exporter (snRNA-E)	Basidiomycota	1.76246
AS_DN136064_c0_g1	The Peroxisomal Protein Importer (PPI) Family	Ascomycota	1.75856
AS_DN2890_c0_g1	The ATP-binding Cassette (ABC) Superfamily	Ascomycota	1.7457
AS_DN5464_c0_g1	The Ammonium Transporter Channel (Amt) Family	Ascomycota	1.73305
AS_DN129538_c0_g1	The Putative Vectorial Glycosyl Polymerization (VGP) Family	Ascomycota	1.72597
AS_DN117606_c0_g1	The Calcium-dependent Chloride Channel (Ca-ClC) Family	Basidiomycota	1.72533
AS_DN9890_c0_g1	The Amino Acid-Polyamine-Organocation (APC) Family	Basidiomycota	1.71907
AS_DN61296_c0_g1	The Endoplasmic Reticular Retrotranslocon (ER-RT) Family	Ascomycota	1.70341
AS_DN105285_c0_g1	The Major Facilitator Superfamily (MFS)	Ascomycota	1.68759
AS_DN75191_c0_g1	The Ubiquitin-related Protein Degradation (UPD) Family	Ascomycota	1.67172
AS_DN101403_c0_g1	The Endoplasmic Reticular Retrotranslocon (ER-RT) Family	Ascomycota	1.65347
AS_DN74387_c0_g1	The Major Facilitator Superfamily (MFS)	Ascomycota	1.62818
AS_DN103981_c0_g1	The Mitochondrial and Plastid Porin (MPP) Family	Ascomycota	1.62068
AS_DN101801_c0_g1	The TMS Recognition/Insertion Complex (TRC) Family	Ascomycota	1.59848
AS_DN138689_c0_g1	The Cation Channel-forming Heat Shock Protein-70 (Hsp70) Family	Ascomycota	1.58293
AS_DN118248_c0_g1	The ATP-binding Cassette (ABC) Superfamily	Ascomycota	1.57689
AS_DN108909_c0_g1	The H+ or Na+-translocating NADH Dehydrogenase (NDH) Family	Basidiomycota	1.55013
AS_DN73215_c0_g1	The Drug/Metabolite Transporter (DMT) Superfamily	Ascomycota	1.53461
AS_DN111284_c0_g1	The Voltage-gated K+ Channel β-subunit (Kvβ) Family	Basidiomycota	1.53393
AS_DN124508_c0_g1	The Nucleobase:Cation Symporter-1 (NCS1) Family	Ascomycota	1.52825
AS_DN99433_c0_g1	The Cation Channel-forming Heat Shock Protein-70 (Hsp70) Family	Ascomycota	1.52722
AS_DN77827_c0_g1	The Calmodulin Calcium Binding Protein (Calmodulin) Family	Ascomycota	1.52367
AS_DN74129_c0_g1	The H+ or Na+-translocating NADH Dehydrogenase (NDH) Family	Basidiomycota	1.51461
AS_DN128451_c0_g1	The Nuclear Pore Complex (NPC) Family	Ascomycota	1.51343
AS_DN111523_c0_g1	The ATP-binding Cassette (ABC) Superfamily	Ascomycota	1.50254
AS_DN4176_c0_g1	The Cation Channel-forming Heat Shock Protein-70 (Hsp70) Family	Ascomycota	1.49603
AS_DN77359_c0_g1	The H+- or Na+-translocating F-type, V-type and A-type ATPase (F-ATPase) Superfamily	Basidiomycota	1.49535
AS_DN69416_c0_g1	The ATP-binding Cassette (ABC) Superfamily	Ascomycota	1.48215
AS_DN65954_c0_g1	The Chloroplast Envelope Protein Translocase (CEPT or Tic-Toc) Family	Ascomycota	1.47964
AS_DN66496_c0_g1	The Putative Vectorial Glycosyl Polymerization (VGP) Family	Ascomycota	1.46214
AS_DN64366_c0_g1	The Drug/Metabolite Transporter (DMT) Superfamily	Ascomycota	1.46003
AS_DN87527_c0_g1	The Ion-translocating Microbial Rhodopsin (MR) Family	Ascomycota	1.44212
AS_DN13420_c1_g1	The H+- or Na+-translocating F-type, V-type and A-type ATPase (F-ATPase) Superfamily	Basidiomycota	1.43184
AS_DN96561_c0_g1	The Mitochondrial Carrier (MC) Family	Ascomycota	1.4304
AS_DN135294_c0_g1	The Drug/Metabolite Transporter (DMT) Superfamily	Ascomycota	1.42833
AS_DN80108_c0_g1	The Major Facilitator Superfamily (MFS)	Ascomycota	1.42827
AS_DN120595_c0_g1	The Nuclear Pore Complex (NPC) Family	Basidiomycota	1.4214
AS_DN137094_c0_g1	The Calmodulin Calcium Binding Protein (Calmodulin) Family	Ascomycota	1.41813
AS_DN84599_c0_g1	The Mitochondrial Carrier (MC) Family	Basidiomycota	1.39923
AS_DN110837_c0_g1	The Ubiquitin-related Protein Degradation (UPD) Family	Ascomycota	1.39808
AS_DN103315_c0_g1	The Ion-translocating Microbial Rhodopsin (MR) Family	Ascomycota	1.35848
AS_DN62354_c0_g1	The H+- or Na+-translocating F-type, V-type and A-type ATPase (F-ATPase) Superfamily	Ascomycota	1.35695
AS_DN122089_c0_g1	The Transcription-coupled TREX/TAP Nuclear mRNA Export Complex (TREX) Family	Ascomycota	1.31276
AS_DN130089_c0_g1	The ATP-binding Cassette (ABC) Superfamily	Ascomycota	1.26913
AS_DN66373_c0_g1	The Glycan Synthase, Fks1 (Fks1) Family	Ascomycota	1.26092
AS_DN81724_c0_g1	The Transcription-coupled TREX/TAP Nuclear mRNA Export Complex (TREX) Family	Ascomycota	1.24237
AS_DN85211_c0_g1	The Endoplasmic Reticular Retrotranslocon (ER-RT) Family	Ascomycota	1.24025
AS_DN121603_c0_g1	The Mitochondrial Inner Membrane i-AAA Protease Complex (MIMP) Familly	Ascomycota	1.23156
AS_DN100495_c0_g1	The Chloroplast Envelope Protein Translocase (CEPT or Tic-Toc) Family	Ascomycota	1.22126
AS_DN65952_c0_g1	The P-type ATPase (P-ATPase) Superfamily	Ascomycota	1.17377
AS_DN65116_c0_g1	The Chloroplast Envelope Protein Translocase (CEPT or Tic-Toc) Family	Ascomycota	1.16072
AS_DN9263_c0_g1	The Cation Channel-forming Heat Shock Protein-70 (Hsp70) Family	Ascomycota	1.12989
AS_DN98738_c0_g1	The Endophilin (Endophilin) Family	Ascomycota	1.12603
AS_DN92627_c0_g1	The Chloroplast Envelope Protein Translocase (CEPT or Tic-Toc) Family	Ascomycota	1.12223
AS_DN75276_c0_g1	The H+ or Na+-translocating NADH Dehydrogenase (NDH) Family	Ascomycota	1.11351
AS_DN68577_c0_g1	The Retromer-dependent Vacuolar Protein Sorting (R-VPS) Family	Ascomycota	1.11219
AS_DN130035_c0_g1	The 5'-AMP-activated protein kinase (AMPK) Family	Ascomycota	1.10413
AS_DN59986_c0_g1	The ATP-binding Cassette (ABC) Superfamily	Basidiomycota	1.071
AS_DN114658_c0_g1	The Heterokaryon Incompatibility Prion/Amyloid Protein (HET-s) Family	Ascomycota	1.04846
AS_DN86949_c0_g1	The Endoplasmic Reticular Retrotranslocon (ER-RT) Family	Basidiomycota	1.03149
AS_DN68800_c0_g1	The Chloroplast Envelope Protein Translocase (CEPT or Tic-Toc) Family	Ascomycota	0.949249
AS_DN111925_c0_g1	The Phagocyte (gp91phox) NADPH Oxidase Family	Ascomycota	0.891951
AS_DN60368_c0_g1	The G-Protein αβγ Complex (GPC) Family	Basidiomycota	0.867256
AS_DN93434_c0_g1	The Transcription-coupled TREX/TAP Nuclear mRNA Export Complex (TREX) Family	Ascomycota	0.866744
AS_DN69452_c0_g1	The Ammonium Transporter Channel (Amt) Family	Basidiomycota	0.835423

## Sheet: Hybrid 11648
Hybrid11648
ID	TCDB family	Fungi classification	Root mean expression (TPM)		TCDB	TCDB family ID	Asco count	Basidio count	All count
HY_DN39331_c2_g1	The Endoplasmic Reticular Retrotranslocon (ER-RT) Family	Ascomycota	413.131		The Cation Channel-forming Heat Shock Protein-70 (Hsp70) Family	1.A.33	10	5	15
HY_DN32985_c0_g1	The Mitochondrial Carrier (MC) Family	Basidiomycota	46.3742		The Endoplasmic Reticular Retrotranslocon (ER-RT) Family	3.A.16	10	4	14
HY_DN36716_c2_g1	The Endoplasmic Reticular Retrotranslocon (ER-RT) Family	Ascomycota	37.8592		The ATP-binding Cassette (ABC) Superfamily	3.A.1	10	2	12
HY_DN36716_c3_g1	The Endoplasmic Reticular Retrotranslocon (ER-RT) Family	Ascomycota	32.6951		The Major Facilitator Superfamily (MFS)	2.A.1	9	2	11
HY_DN28452_c0_g1	The Endoplasmic Reticular Retrotranslocon (ER-RT) Family	Basidiomycota	26.5511		The H+- or Na+-translocating F-type, V-type and A-type ATPase (F-ATPase) Superfamily	3.A.2	0	10	10
HY_DN38958_c4_g2	The Cation Channel-forming Heat Shock Protein-70 (Hsp70) Family	Basidiomycota	23.0811		The HSP90/CDC37 (HSP90/CDC37) Family	8.A.163	1	7	8
HY_DN39005_c7_g1	The HSP90/CDC37 (HSP90/CDC37) Family	Basidiomycota	22.6438		The Mitochondrial Carrier (MC) Family	2.A.29	4	4	8
HY_DN10827_c0_g1	The Endoplasmic Reticular Retrotranslocon (ER-RT) Family	Ascomycota	21.6277		The Nuclear mRNA Exporter (mRNA-E) Family	3.A.18	4	3	7
HY_DN70040_c0_g1	The Cation Channel-forming Heat Shock Protein-70 (Hsp70) Family	Ascomycota	20.5834		The P-type ATPase (P-ATPase) Superfamily	3.A.3	3	1	4
HY_DN39331_c3_g1	The Endoplasmic Reticular Retrotranslocon (ER-RT) Family	Ascomycota	19.6622		The Type VI Symbiosis/Virulence Secretory System (T6SS) Family	3.A.23	3	1	4
HY_DN39331_c6_g1	The Endoplasmic Reticular Retrotranslocon (ER-RT) Family	Ascomycota	18.1557		The 14-3-3 protein (14-3-3) Family	8.A.98	1	2	3
HY_DN38417_c0_g2	The Mitochondrial Carrier (MC) Family	Ascomycota	16.1227		The G-Protein αβγ Complex (GPC) Family	8.A.92	1	2	3
HY_DN33070_c1_g1	The Cation Channel-forming Heat Shock Protein-70 (Hsp70) Family	Basidiomycota	15.8899		The Nuclear Pore Complex (NPC) Family	1.I.1	3	0	3
HY_DN27209_c0_g1	The Autophagy-related Phagophore-formation Transporter (APT) Family	Basidiomycota	13.9393		The Nuclear t-RNA exporter (tRNA-E) Family	9.A.50	3	0	3
HY_DN31260_c0_g1	The HSP90/CDC37 (HSP90/CDC37) Family	Basidiomycota	13.2728		The Proton-dependent Oligopeptide Transporter (POT/PTR) Family	2.A.17	2	1	3
HY_DN19574_c0_g1	The Endoplasmic Reticular Retrotranslocon (ER-RT) Family	Ascomycota	13.2068		The Retromer-dependent Vacuolar Protein Sorting (R-VPS) Family	9.A.63	3	0	3
HY_DN32890_c0_g1	The Nuclear mRNA Exporter (mRNA-E) Family	Ascomycota	10.5379		The Transcription-coupled TREX/TAP Nuclear mRNA Export Complex (TREX) Family	3.A.22	3	0	3
HY_DN57893_c0_g1	The HSP90/CDC37 (HSP90/CDC37) Family	Basidiomycota	9.72709		The Endosomal Sorting Complexes Required for Transport III (ESCRT-III) Family	3.A.31	0	3	3
HY_DN4914_c0_g1	The Cation Channel-forming Heat Shock Protein-70 (Hsp70) Family	Ascomycota	9.69344		The Phagocyte (gp91phox) NADPH Oxidase Family	5.B.1	0	3	3
HY_DN24210_c0_g1	The H+- or Na+-translocating F-type, V-type and A-type ATPase (F-ATPase) Superfamily	Basidiomycota	9.35266		The Anion Channel-forming Bestrophin (Bestrophin) Family	1.A.46	2	0	2
HY_DN37091_c1_g1	The Peroxisomal Protein Importer (PPI) Family	Basidiomycota	9.29637		The Autophagy-related Phagophore-formation Transporter (APT) Family	9.A.15	1	1	2
HY_DN25247_c0_g1	The H+ or Na+-translocating NADH Dehydrogenase (NDH) Family	Basidiomycota	9.2699		The Ca2+:Cation Antiporter (CaCA) Family	2.A.19	2	0	2
HY_DN32890_c0_g2	The Nuclear mRNA Exporter (mRNA-E) Family	Ascomycota	8.17639		The Chloroplast Envelope Protein Translocase (CEPT or Tic-Toc) Family	3.A.9	1	1	2
HY_DN23746_c0_g1	The Small Nuclear RNA Exporter (snRNA-E)	Basidiomycota	7.54758		The Mitochondrial Protein Translocase (MPT) Family	3.A.8	1	1	2
HY_DN29612_c0_g1	The 14-3-3 protein (14-3-3) Family	Basidiomycota	6.59656		The Nucleobase:Cation Symporter-1 (NCS1) Family	2.A.39	2	0	2
HY_DN81243_c0_g1	The HSP90/CDC37 (HSP90/CDC37) Family	Basidiomycota	6.23526		The Peroxisomal Protein Importer (PPI) Family	3.A.20	1	1	2
HY_DN14663_c0_g1	The Mitochondrial Carrier (MC) Family	Basidiomycota	6.20744		The AAA-ATPase, Bcs1 (Bcs1) Family	3.A.28	0	2	2
HY_DN100369_c0_g1	The Endoplasmic Reticular Retrotranslocon (ER-RT) Family	Basidiomycota	5.85331		The H+ or Na+-translocating NADH Dehydrogenase (NDH) Family	3.D.1	0	2	2
HY_DN1323_c0_g1	The Type VI Symbiosis/Virulence Secretory System (T6SS) Family	Ascomycota	5.14262		The Auxin Efflux Carrier (AEC) Family	2.A.69	1	0	1
HY_DN115752_c0_g1	The Endoplasmic Reticular Retrotranslocon (ER-RT) Family	Basidiomycota	4.88174		The CorA Metal Ion Transporter (MIT) Family	1.A.35	1	0	1
HY_DN6686_c0_g1	The H+- or Na+-translocating F-type, V-type and A-type ATPase (F-ATPase) Superfamily	Basidiomycota	4.75484		The Drug/Metabolite Transporter (DMT) Superfamily	2.A.7	1	0	1
HY_DN13229_c0_g1	The Cation Channel-forming Heat Shock Protein-70 (Hsp70) Family	Ascomycota	4.70079		The Endophilin (Endophilin) Family	8.A.34	1	0	1
HY_DN27567_c0_g1	The Major Facilitator Superfamily (MFS)	Ascomycota	4.681		The Glycan Synthase, Fks1 (Fks1) Family	9.B.119	1	0	1
HY_DN5441_c0_g1	The ATP-binding Cassette (ABC) Superfamily	Basidiomycota	4.5626		The Ion-translocating Microbial Rhodopsin (MR) Family	3.E.1	1	0	1
HY_DN5039_c0_g1	The H+- or Na+-translocating F-type, V-type and A-type ATPase (F-ATPase) Superfamily	Basidiomycota	4.41171		The Non ABC Multidrug Exporter (N-MDE) Family	9.A.1	1	0	1
HY_DN67224_c0_g1	The Phagocyte (gp91phox) NADPH Oxidase Family	Basidiomycota	4.32619		The Prenylated Rab Acceptor Protein 1 (PRA1) Family	9.A.49	1	0	1
HY_DN31792_c0_g1	The Type VI Symbiosis/Virulence Secretory System (T6SS) Family	Basidiomycota	4.14473		The Proton-translocating Cytochrome Oxidase (COX) Superfamily	3.D.4	1	0	1
HY_DN14642_c0_g1	The Sorting Nexin27 (SNX27)-Retromer Assembly Apparatus (RetromerAA) Family	Basidiomycota	4.07569		The Putative Vectorial Glycosyl Polymerization (VGP) Family	4.D.1	1	0	1
HY_DN22361_c0_g1	The Phagocyte (gp91phox) NADPH Oxidase Family	Basidiomycota	4.00647		The Ubiquitin-related Protein Degradation (UPD) Family	8.A.52	1	0	1
HY_DN39005_c0_g1	The HSP90/CDC37 (HSP90/CDC37) Family	Basidiomycota	3.97157		The Cation Diffusion Facilitator (CDF) Family	2.A.4	0	1	1
HY_DN27597_c0_g1	The Endoplasmic Reticular Retrotranslocon (ER-RT) Family	Basidiomycota	3.90407		The Mitochondrial Inner Membrane i-AAA Protease Complex (MIMP) Familly	3.A.29	0	1	1
HY_DN60320_c0_g1	The Cation Diffusion Facilitator (CDF) Family	Basidiomycota	3.90197		The Oligopeptide Transporter (OPT) Family	2.A.67	0	1	1
HY_DN7588_c0_g1	The Mitochondrial Carrier (MC) Family	Basidiomycota	3.89507		The Small Nuclear RNA Exporter (snRNA-E)	9.A.60	0	1	1
HY_DN106020_c0_g1	The HSP90/CDC37 (HSP90/CDC37) Family	Basidiomycota	3.84211		The Sorting Nexin27 (SNX27)-Retromer Assembly Apparatus (RetromerAA) Family	9.A.3	0	1	1
HY_DN83190_c0_g1	The Endosomal Sorting Complexes Required for Transport III (ESCRT-III) Family	Basidiomycota	3.8219		The Stomatin/Podocin/Band 7/Nephrosis.2/SPFH (Stomatin) Family	8.A.21	0	1	1
HY_DN87076_c0_g1	The HSP90/CDC37 (HSP90/CDC37) Family	Basidiomycota	3.79694		The Synaptosomal Vesicle Fusion Pore (SVF-Pore) Family	1.F.1	0	1	1
HY_DN94514_c0_g1	The Cation Channel-forming Heat Shock Protein-70 (Hsp70) Family	Ascomycota	3.75638
HY_DN47779_c0_g1	The Type VI Symbiosis/Virulence Secretory System (T6SS) Family	Ascomycota	3.73301
HY_DN11380_c0_g1	The Mitochondrial Carrier (MC) Family	Ascomycota	3.72575
HY_DN81364_c0_g1	The Nuclear mRNA Exporter (mRNA-E) Family	Ascomycota	3.71374
HY_DN104507_c0_g1	The Autophagy-related Phagophore-formation Transporter (APT) Family	Ascomycota	3.57026
HY_DN104397_c0_g1	The Major Facilitator Superfamily (MFS)	Ascomycota	3.45079
HY_DN27007_c0_g1	The Mitochondrial Carrier (MC) Family	Ascomycota	3.42115
HY_DN54127_c0_g1	The H+- or Na+-translocating F-type, V-type and A-type ATPase (F-ATPase) Superfamily	Basidiomycota	3.41885
HY_DN11024_c0_g1	The Major Facilitator Superfamily (MFS)	Ascomycota	3.34186
HY_DN108968_c0_g1	The H+- or Na+-translocating F-type, V-type and A-type ATPase (F-ATPase) Superfamily	Basidiomycota	3.33697
HY_DN14417_c0_g1	The Nuclear Pore Complex (NPC) Family	Ascomycota	3.30266
HY_DN594_c0_g1	The Nuclear mRNA Exporter (mRNA-E) Family	Ascomycota	3.22298
HY_DN88489_c0_g1	The Cation Channel-forming Heat Shock Protein-70 (Hsp70) Family	Basidiomycota	3.18306
HY_DN113227_c0_g1	The Cation Channel-forming Heat Shock Protein-70 (Hsp70) Family	Basidiomycota	3.16676
HY_DN93710_c0_g1	The P-type ATPase (P-ATPase) Superfamily	Basidiomycota	3.10584
HY_DN12217_c0_g1	The Cation Channel-forming Heat Shock Protein-70 (Hsp70) Family	Basidiomycota	3.05957
HY_DN106991_c0_g1	The Endoplasmic Reticular Retrotranslocon (ER-RT) Family	Ascomycota	3.04068
HY_DN98051_c0_g1	The Stomatin/Podocin/Band 7/Nephrosis.2/SPFH (Stomatin) Family	Basidiomycota	2.94282
HY_DN65845_c0_g1	The Endoplasmic Reticular Retrotranslocon (ER-RT) Family	Ascomycota	2.87307
HY_DN4610_c0_g1	The Mitochondrial Inner Membrane i-AAA Protease Complex (MIMP) Familly	Basidiomycota	2.84369
HY_DN81984_c0_g1	The Nuclear t-RNA exporter (tRNA-E) Family	Ascomycota	2.83623
HY_DN20424_c0_g1	The Major Facilitator Superfamily (MFS)	Ascomycota	2.8328
HY_DN14810_c0_g1	The Endoplasmic Reticular Retrotranslocon (ER-RT) Family	Ascomycota	2.82413
HY_DN10436_c1_g1	The 14-3-3 protein (14-3-3) Family	Ascomycota	2.81835
HY_DN11941_c0_g1	The Transcription-coupled TREX/TAP Nuclear mRNA Export Complex (TREX) Family	Ascomycota	2.81515
HY_DN3954_c0_g1	The G-Protein αβγ Complex (GPC) Family	Basidiomycota	2.80027
HY_DN12251_c0_g1	The Mitochondrial Carrier (MC) Family	Ascomycota	2.78417
HY_DN19647_c0_g1	The Major Facilitator Superfamily (MFS)	Ascomycota	2.75727
HY_DN111694_c0_g1	The HSP90/CDC37 (HSP90/CDC37) Family	Asco or Basidio	2.67449
HY_DN101040_c0_g1	The Oligopeptide Transporter (OPT) Family	Basidiomycota	2.62385
HY_DN53327_c0_g1	The Mitochondrial Carrier (MC) Family	Basidiomycota	2.60206
HY_DN113423_c0_g1	The H+- or Na+-translocating F-type, V-type and A-type ATPase (F-ATPase) Superfamily	Basidiomycota	2.60021
HY_DN49986_c0_g1	The Nuclear mRNA Exporter (mRNA-E) Family	Basidiomycota	2.58889
HY_DN53522_c0_g1	The Ca2+:Cation Antiporter (CaCA) Family	Ascomycota	2.58337
HY_DN31293_c0_g1	The HSP90/CDC37 (HSP90/CDC37) Family	Ascomycota	2.55288
HY_DN10036_c0_g1	The P-type ATPase (P-ATPase) Superfamily	Ascomycota	2.54889
HY_DN95581_c0_g1	The AAA-ATPase, Bcs1 (Bcs1) Family	Basidiomycota	2.54172
HY_DN94927_c0_g1	The Nuclear Pore Complex (NPC) Family	Ascomycota	2.51423
HY_DN83064_c0_g1	The H+- or Na+-translocating F-type, V-type and A-type ATPase (F-ATPase) Superfamily	Basidiomycota	2.50443
HY_DN81151_c0_g1	The Cation Channel-forming Heat Shock Protein-70 (Hsp70) Family	Ascomycota	2.45392
HY_DN53169_c0_g1	The Retromer-dependent Vacuolar Protein Sorting (R-VPS) Family	Ascomycota	2.4328
HY_DN39605_c0_g1	The Retromer-dependent Vacuolar Protein Sorting (R-VPS) Family	Ascomycota	2.41927
HY_DN23334_c0_g1	The H+- or Na+-translocating F-type, V-type and A-type ATPase (F-ATPase) Superfamily	Basidiomycota	2.41247
HY_DN52422_c0_g1	The Endosomal Sorting Complexes Required for Transport III (ESCRT-III) Family	Basidiomycota	2.39287
HY_DN109976_c0_g1	The Glycan Synthase, Fks1 (Fks1) Family	Ascomycota	2.36831
HY_DN6995_c0_g1	The AAA-ATPase, Bcs1 (Bcs1) Family	Basidiomycota	2.33966
HY_DN80496_c1_g1	The Nuclear Pore Complex (NPC) Family	Ascomycota	2.28863
HY_DN55140_c0_g1	The Nuclear t-RNA exporter (tRNA-E) Family	Ascomycota	2.28605
HY_DN83661_c0_g1	The Transcription-coupled TREX/TAP Nuclear mRNA Export Complex (TREX) Family	Ascomycota	2.27968
HY_DN63348_c0_g1	The Major Facilitator Superfamily (MFS)	Basidiomycota	2.26932
HY_DN80087_c0_g1	The ATP-binding Cassette (ABC) Superfamily	Ascomycota	2.25499
HY_DN99403_c0_g1	The Major Facilitator Superfamily (MFS)	Ascomycota	2.23987
HY_DN99425_c0_g1	The P-type ATPase (P-ATPase) Superfamily	Ascomycota	2.22357
HY_DN41448_c0_g1	The Cation Channel-forming Heat Shock Protein-70 (Hsp70) Family	Ascomycota	2.22277
HY_DN105796_c0_g1	The ATP-binding Cassette (ABC) Superfamily	Ascomycota	2.21463
HY_DN93216_c0_g1	The Peroxisomal Protein Importer (PPI) Family	Ascomycota	2.19678
HY_DN7118_c0_g1	The Nuclear mRNA Exporter (mRNA-E) Family	Basidiomycota	2.19598
HY_DN66735_c0_g1	The Nucleobase:Cation Symporter-1 (NCS1) Family	Ascomycota	2.17384
HY_DN92254_c0_g1	The Prenylated Rab Acceptor Protein 1 (PRA1) Family	Ascomycota	2.16688
HY_DN19070_c0_g1	The Phagocyte (gp91phox) NADPH Oxidase Family	Basidiomycota	2.14252
HY_DN23298_c1_g1	The Type VI Symbiosis/Virulence Secretory System (T6SS) Family	Ascomycota	2.14234
HY_DN93386_c0_g1	The Ubiquitin-related Protein Degradation (UPD) Family	Ascomycota	2.13717
HY_DN115764_c0_g1	The Nuclear t-RNA exporter (tRNA-E) Family	Ascomycota	2.12689
HY_DN20442_c0_g1	The 14-3-3 protein (14-3-3) Family	Basidiomycota	2.09034
HY_DN114244_c0_g1	The H+- or Na+-translocating F-type, V-type and A-type ATPase (F-ATPase) Superfamily	Basidiomycota	2.08871
HY_DN89260_c0_g1	The Chloroplast Envelope Protein Translocase (CEPT or Tic-Toc) Family	Basidiomycota	2.07587
HY_DN106685_c0_g1	The Anion Channel-forming Bestrophin (Bestrophin) Family	Ascomycota	2.07352
HY_DN93144_c0_g1	The Cation Channel-forming Heat Shock Protein-70 (Hsp70) Family	Ascomycota	2.05375
HY_DN109121_c0_g1	The Nucleobase:Cation Symporter-1 (NCS1) Family	Ascomycota	2.02259
HY_DN84751_c0_g1	The Proton-dependent Oligopeptide Transporter (POT/PTR) Family	Ascomycota	1.9823
HY_DN56583_c0_g1	The H+ or Na+-translocating NADH Dehydrogenase (NDH) Family	Basidiomycota	1.95857
HY_DN96310_c0_g1	The Major Facilitator Superfamily (MFS)	Ascomycota	1.87671
HY_DN47451_c0_g1	The Cation Channel-forming Heat Shock Protein-70 (Hsp70) Family	Ascomycota	1.87442
HY_DN106570_c0_g1	The Cation Channel-forming Heat Shock Protein-70 (Hsp70) Family	Ascomycota	1.79673
HY_DN108383_c0_g1	The ATP-binding Cassette (ABC) Superfamily	Basidiomycota	1.79578
HY_DN5778_c0_g1	The ATP-binding Cassette (ABC) Superfamily	Ascomycota	1.79094
HY_DN57147_c0_g1	The Proton-translocating Cytochrome Oxidase (COX) Superfamily	Ascomycota	1.76483
HY_DN105444_c0_g1	The Ca2+:Cation Antiporter (CaCA) Family	Ascomycota	1.76333
HY_DN68001_c0_g1	The Cation Channel-forming Heat Shock Protein-70 (Hsp70) Family	Ascomycota	1.75439
HY_DN85360_c0_g1	The Nuclear mRNA Exporter (mRNA-E) Family	Basidiomycota	1.75174
HY_DN65483_c0_g1	The Drug/Metabolite Transporter (DMT) Superfamily	Ascomycota	1.7368
HY_DN13249_c1_g1	The Endosomal Sorting Complexes Required for Transport III (ESCRT-III) Family	Basidiomycota	1.70915
HY_DN83694_c0_g1	The ATP-binding Cassette (ABC) Superfamily	Ascomycota	1.69132
HY_DN68025_c0_g1	The Auxin Efflux Carrier (AEC) Family	Ascomycota	1.61561
HY_DN84187_c0_g1	The Chloroplast Envelope Protein Translocase (CEPT or Tic-Toc) Family	Ascomycota	1.58347
HY_DN71220_c0_g1	The Transcription-coupled TREX/TAP Nuclear mRNA Export Complex (TREX) Family	Ascomycota	1.58262
HY_DN44235_c0_g1	The ATP-binding Cassette (ABC) Superfamily	Ascomycota	1.58028
HY_DN68658_c0_g1	The G-Protein αβγ Complex (GPC) Family	Ascomycota	1.54689
HY_DN65619_c0_g1	The Endophilin (Endophilin) Family	Ascomycota	1.54499
HY_DN107565_c0_g1	The ATP-binding Cassette (ABC) Superfamily	Ascomycota	1.52474
HY_DN66019_c0_g1	The Ion-translocating Microbial Rhodopsin (MR) Family	Ascomycota	1.5232
HY_DN104948_c0_g1	The Non ABC Multidrug Exporter (N-MDE) Family	Ascomycota	1.50552
HY_DN55546_c0_g1	The Proton-dependent Oligopeptide Transporter (POT/PTR) Family	Ascomycota	1.50346
HY_DN109183_c0_g1	The Putative Vectorial Glycosyl Polymerization (VGP) Family	Ascomycota	1.48842
HY_DN46531_c0_g1	The Major Facilitator Superfamily (MFS)	Ascomycota	1.46046
HY_DN66116_c0_g1	The Mitochondrial Protein Translocase (MPT) Family	Basidiomycota	1.39568
HY_DN46287_c0_g1	The Major Facilitator Superfamily (MFS)	Basidiomycota	1.3603
HY_DN6592_c0_g1	The Proton-dependent Oligopeptide Transporter (POT/PTR) Family	Basidiomycota	1.3146
HY_DN67356_c0_g1	The ATP-binding Cassette (ABC) Superfamily	Ascomycota	1.3041
HY_DN78454_c0_g1	The Mitochondrial Protein Translocase (MPT) Family	Ascomycota	1.1949
HY_DN106302_c0_g1	The Major Facilitator Superfamily (MFS)	Ascomycota	1.17854
HY_DN45225_c0_g1	The G-Protein αβγ Complex (GPC) Family	Other fungi	1.17213
HY_DN54007_c0_g1	The ATP-binding Cassette (ABC) Superfamily	Ascomycota	1.16742
HY_DN108106_c0_g1	The H+- or Na+-translocating F-type, V-type and A-type ATPase (F-ATPase) Superfamily	Other fungi	1.15774
HY_DN65961_c0_g1	The ATP-binding Cassette (ABC) Superfamily	Ascomycota	1.13843
HY_DN74180_c0_g1	The Retromer-dependent Vacuolar Protein Sorting (R-VPS) Family	Ascomycota	1.06907
HY_DN61429_c0_g1	The CorA Metal Ion Transporter (MIT) Family	Ascomycota	1.05306
HY_DN47183_c0_g1	The Synaptosomal Vesicle Fusion Pore (SVF-Pore) Family	Basidiomycota	1.01781
HY_DN83297_c0_g1	The Anion Channel-forming Bestrophin (Bestrophin) Family	Ascomycota	1.00381
HY_DN102517_c0_g1	The ATP-binding Cassette (ABC) Superfamily	Ascomycota	0.925946
HY_DN71831_c0_g1	The P-type ATPase (P-ATPase) Superfamily	Ascomycota	0.88537
