# Supplementary material for: Fungal communities represent the majority of root-specific transcripts in the transcriptomes of Agave plants grown in semiarid regions
Source: PeerJ. 2022 May 2;10:e13252. doi: 10.7717/peerj.13252 (PMC9070324; doi:10.7717/peerj.13252)
Supplement: Supplemental Information 8 — We did a BLASTn (E-value 1e−10) of all Ascomycota transcripts against a set of concatenated genomes of Talaromyces available at Ensembl Fungi release 46. We selected only blast hits with alignment coverage above 70%. [file peerj-10-13252-s008.xlsx]

## Sheet: A. fourcroydes
ID	Blastn hit (against all Talaromyces genomes)	E-value	Identity (%)	Leaf mean expression (TPM)	Stem mean expression (TPM)	Root mean expression (TPM)	Classification	Pannzer Annotation	Blast Uniref90 annotation	HSP db classification	Leaf SPM	Stem SPM	Root SPM	CAZy	SignalP	TCDB hit description	TCDB Alignment cov (%)
AF_DN51821_c5_g1	KFX50753 cds supercontig:ASM75011v1:scf006:171384:173946:-1 gene:GQ26_0060610 gene_biotype:protein_coding transcript_biotype:protein_coding description:Elongation factor 1-alpha	5e-150	85.3503	0.497545	0.812537	168.953	Ascomycota	NA	UniRef90_D6QT61 Elongation factor 1-alpha (Fragment) n=1 Tax=Rhizoplaca chrysoleuca TaxID=112062 RepID=D6QT61_9LECA	No hit	0.0778749	0.114688	0.990344	No hit	0	0	0
AF_DN51128_c6_g2	KFX42404 cds supercontig:ASM75011v1:scf045:151797:154170:-1 gene:GQ26_0450520 gene_biotype:protein_coding transcript_biotype:protein_coding description:Heat shock protein 90	1e-65	77.9874	35.063	123.085	121.531	Ascomycota	NA	UniRef90_A0A167W9E3 ATP-dependent molecular chaperone HSC82 n=1 Tax=Ascosphaera apis ARSEF 7405 TaxID=392613 RepID=A0A167W9E3_9EURO	Hsp90	0.465909	0.62649	0.624852	No hit	0	gnl|TC-DB|P08238|8.A.163.1.1 Heat shock protein HSP 90-beta OS=Homo sapiens OX=9606 GN=HSP90AB1 PE=1 SV=4	71.6981
AF_DN47931_c1_g2	OKL60345 cds supercontig:ASM190759v1:scaffold_4:693439:695387:-1 gene:UA08_04120 gene_biotype:protein_coding transcript_biotype:protein_coding description:Elongation factor 1-alpha	4e-131	87.2685	0	0.133192	68.4386	Ascomycota	Translation elongation factor 1-alpha (Fragment)	UniRef90_C1IZV9 Translation elongation factor 1 alpha (Fragment) n=40 Tax=Pezizomycotina TaxID=147538 RepID=C1IZV9_9PEZI	No hit	0	0.0294743	0.999566	No hit	0	0	0
AF_DN103552_c0_g1	CRG83199 cds supercontig:PIS:WF-38-12_scaffold00001:1861906:1863876:-1 gene:PISL3812_00549 gene_biotype:protein_coding transcript_biotype:protein_coding description:Heat shock 70 kDa protein	2e-98	81.694	0.054477	0	48.2402	Ascomycota	Heat shock protein 70 (Fragment)	UniRef90_A0A094BQN2 Uncharacterized protein n=1 Tax=Pseudogymnoascus sp. VKM F-3775 TaxID=1420901 RepID=A0A094BQN2_9PEZI	Hsp70	0.0136115	0	0.999907	No hit	0	gnl|TC-DB|P08107|1.A.33.1.3 Heat shock 70 kDa protein 1 (HSP70.1) (HSP70-1/HSP70-2) - Homo sapiens (Human).	92.623
AF_DN44188_c2_g2	EED15041 cds supercontig:JCVI-TSTA1-3.0:scf_1105507295515:1301029:1303167:-1 gene:TSTA_045050 gene_biotype:protein_coding transcript_biotype:protein_coding description:molecular chaperone Hsp70	6e-155	84.7953	0	0	28.8199	Ascomycota	NA	UniRef90_Q92260 Heat shock 70 kDa protein (Fragment) n=1 Tax=Penicillium citrinum TaxID=5077 RepID=HSP70_PENCI	Hsp70	0	0	1	No hit	0	gnl|TC-DB|P08107|1.A.33.1.3 Heat shock 70 kDa protein 1 (HSP70.1) (HSP70-1/HSP70-2) - Homo sapiens (Human).	94.152
AF_DN50952_c3_g1	OKL58285 cds supercontig:ASM190759v1:scaffold_9:1040305:1041929:1 gene:UA08_06747 gene_biotype:protein_coding transcript_biotype:protein_coding description:ATP-dependent RNA helicase eIF4A	0	86.2301	0.00651663	0.0161072	24.8831	Ascomycota	Eukaryotic translation initiation factor 4	UniRef90_W9XLK2 ATP-dependent RNA helicase eIF4A n=1 Tax=Capronia epimyces CBS 606.96 TaxID=1182542 RepID=W9XLK2_9EURO	No hit	0.00199638	0.00491107	0.999986	No hit	0	gnl|TC-DB|P38919|3.A.18.1.1 Eukaryotic initiation factor 4A-III - Homo sapiens (Human).	85.1385
AF_DN53069_c3_g1	CRG85717 cds supercontig:PIS:WF-38-12_scaffold00002:2535545:2537050:1 gene:PISL3812_02740 gene_biotype:protein_coding transcript_biotype:protein_coding description:ADP,ATP carrier protein	3e-142	81.1321	0.060996	0.0249745	21.8797	Ascomycota	NA	UniRef90_Q0URL3 Uncharacterized protein n=16 Tax=Pleosporales TaxID=92860 RepID=Q0URL3_PHANO	No hit	0.0189108	0.00787876	0.99979	No hit	0	gnl|TC-DB|P18239|2.A.29.1.7 ADP,ATP carrier protein 2 - Saccharomyces cerevisiae (Baker's yeast).	82.3899
AF_DN24144_c0_g1	KFX50381 cds supercontig:ASM75011v1:scf007:348166:349540:-1 gene:GQ26_0071240 gene_biotype:protein_coding transcript_biotype:protein_coding description:Uncharacterized protein	4e-81	70.2948	0	0.0304335	20.4462	Ascomycota	Mismatched base pair and cruciform DNA recognition	UniRef90_A0A1Q5QCG9 Uncharacterized protein n=1 Tax=Talaromyces atroroseus TaxID=1441469 RepID=A0A1Q5QCG9_9EURO	No hit	0	0.00977905	0.999952	No hit	0	0	0
AF_DN53841_c2_g2	OKL59070 cds supercontig:ASM190759v1:scaffold_7:1185243:1187269:-1 gene:UA08_05850 gene_biotype:protein_coding transcript_biotype:protein_coding description:Heat shock protein	3e-91	70.5882	0	0	18.9756	Ascomycota	NA	UniRef90_A0A023EKH5 Putative heat shock 70 bb (Fragment) n=1 Tax=Aedes albopictus TaxID=7160 RepID=A0A023EKH5_AEDAL	No hit	0	0	1	No hit	0	0	0
AF_DN42526_c0_g2	OKL60345 cds supercontig:ASM190759v1:scaffold_4:693439:695387:-1 gene:UA08_04120 gene_biotype:protein_coding transcript_biotype:protein_coding description:Elongation factor 1-alpha	0	95.0617	0	0	17.9298	Ascomycota	Translation elongation factor 1-alpha (Fragment)	UniRef90_A0A023VWL2 Translation elongation factor 1 alpha subunit (Fragment) n=2 Tax=leotiomyceta TaxID=716546 RepID=A0A023VWL2_9EURO	No hit	0	0	1	No hit	0	0	0
AF_DN53841_c4_g1	OKL59070 cds supercontig:ASM190759v1:scaffold_7:1185243:1187269:-1 gene:UA08_05850 gene_biotype:protein_coding transcript_biotype:protein_coding description:Heat shock protein	3e-158	84.0426	0	0.019088	16.5057	Ascomycota	NA	UniRef90_A0A194VTH1 NAD-specific glutamate dehydrogenase n=1 Tax=Valsa mali TaxID=105487 RepID=A0A194VTH1_9PEZI	No hit	0	0.00660524	0.999978	No hit	0	0	0
AF_DN46189_c0_g1	OKL55348 cds supercontig:ASM190759v1:scaffold_21:5491:8691:-1 gene:UA08_09331 gene_biotype:protein_coding transcript_biotype:protein_coding description:Elongation factor 3	0	75.1256	0.0254924	0.0219188	15.6374	Ascomycota	Elongation factor 3	UniRef90_A0A150V7D4 Uncharacterized protein n=1 Tax=Acidomyces richmondensis BFW TaxID=766039 RepID=A0A150V7D4_9PEZI	No hit	0.00895243	0.00771096	0.99993	No hit	0	0	0
AF_DN6274_c0_g1	OKL57283 cds supercontig:ASM190759v1:scaffold_11:802444:802926:-1 gene:UA08_07561 gene_biotype:protein_coding transcript_biotype:protein_coding description:putative ribose 5-phosphate isomerase	7e-134	83.7449	0	0.0244252	15.448	Ascomycota	Ribose 5-phosphate isomerase RpiB	UniRef90_A0A225AE36 Putative ribose 5-phosphate isomerase n=1 Tax=Talaromyces atroroseus TaxID=1441469 RepID=A0A225AE36_9EURO	No hit	0	0.00861751	0.999963	No hit	0	0	0
AF_DN1778_c0_g1	EED15041 cds supercontig:JCVI-TSTA1-3.0:scf_1105507295515:1301029:1303167:-1 gene:TSTA_045050 gene_biotype:protein_coding transcript_biotype:protein_coding description:molecular chaperone Hsp70	1e-100	84.6995	0	0	15.0783	Ascomycota	NA	UniRef90_A0A2A9P3N8 Uncharacterized protein n=1 Tax=Ophiocordyceps unilateralis TaxID=268505 RepID=A0A2A9P3N8_9HYPO	Hsp70	0	0	1	No hit	0	gnl|TC-DB|P10591|3.A.16.1.6 Heat shock protein SSA1 OS=Saccharomyces cerevisiae (strain ATCC 204508 / S288c) OX=559292 GN=SSA1 PE=1 SV=4	87.7049
AF_DN83601_c0_g1	KFX47104 cds supercontig:ASM75011v1:scf016:391874:394521:-1 gene:GQ26_0161420 gene_biotype:protein_coding transcript_biotype:protein_coding description:Heat shock 70 kDa protein	2e-82	82.4405	0	0	13.5845	Ascomycota	NA	UniRef90_A0A0G4KI51 Uncharacterized protein (Fragment) n=1 Tax=Verticillium longisporum TaxID=100787 RepID=A0A0G4KI51_9PEZI	Hsp70	0	0	1	No hit	0	gnl|TC-DB|P10591|3.A.16.1.6 Heat shock protein SSA1 OS=Saccharomyces cerevisiae (strain ATCC 204508 / S288c) OX=559292 GN=SSA1 PE=1 SV=4	96.4286
AF_DN36340_c0_g1	EED20992 cds supercontig:JCVI-TSTA1-3.0:scf_1105507295527:491823:492608:1 gene:TSTA_082250 gene_biotype:protein_coding transcript_biotype:protein_coding description:cell surface protein,putative	3e-137	86.6228	0	0.0429169	11.772	Ascomycota	Cell surface protein, putative	UniRef90_A0A2H3I3F9 Uncharacterized protein n=1 Tax=Penicillium occitanis TaxID=290292 RepID=A0A2H3I3F9_9EURO	No hit	0	0.0164945	0.999864	No hit	0	0	0
AF_DN44550_c0_g1	EED15616 cds supercontig:JCVI-TSTA1-3.0:scf_1105507295515:2731326:2734900:-1 gene:TSTA_050550 gene_biotype:protein_coding transcript_biotype:protein_coding description:translation elongation factor eEF-3, putative	1e-120	89.7661	0	0	11.6016	Ascomycota	NA	UniRef90_B8MIV4 Translation elongation factor eEF-3, putative n=6 Tax=Eurotiales TaxID=5042 RepID=B8MIV4_TALSN	No hit	0	0	1	No hit	0	0	0
AF_DN28773_c1_g1	CRG83199 cds supercontig:PIS:WF-38-12_scaffold00001:1861906:1863876:-1 gene:PISL3812_00549 gene_biotype:protein_coding transcript_biotype:protein_coding description:Heat shock 70 kDa protein	2e-38	70.9877	0	0	9.27239	Ascomycota	Heat shock 70 kDa protein (Fragment)	UniRef90_A0A1J9PVV4 Hsp72-like protein n=1 Tax=Emergomyces pasteuriana Ep9510 TaxID=1447872 RepID=A0A1J9PVV4_9EURO	Hsp70	0	0	1	No hit	0	gnl|TC-DB|P22953|1.A.33.1.1 HEAT SHOCK COGNATE 70 KDA PROTEIN 1 (HSC70.1) - Arabidopsis thaliana (Mouse-ear cress).	75
AF_DN54159_c4_g3	EED15041 cds supercontig:JCVI-TSTA1-3.0:scf_1105507295515:1301029:1303167:-1 gene:TSTA_045050 gene_biotype:protein_coding transcript_biotype:protein_coding description:molecular chaperone Hsp70	2e-114	81.741	0	0	8.6667	Ascomycota	Heat shock protein 70 (Fragment)	UniRef90_A5HVI6 Heat shock protein 70 (Fragment) n=1 Tax=Paracoccidioides brasiliensis TaxID=121759 RepID=A5HVI6_PARBR	Hsp70	0	0	1	No hit	0	gnl|TC-DB|P10591|3.A.16.1.6 Heat shock protein SSA1 OS=Saccharomyces cerevisiae (strain ATCC 204508 / S288c) OX=559292 GN=SSA1 PE=1 SV=4	96.8153
AF_DN37109_c0_g1	OKL64404 cds supercontig:ASM190759v1:scaffold_0:3262227:3266886:1 gene:UA08_01129 gene_biotype:protein_coding transcript_biotype:protein_coding description:Heat shock protein hsp98	0	87.0968	0	0.0124385	8.38282	Ascomycota	ATP-dependent chaperone ClpB	UniRef90_A0A225B120 Heat shock protein hsp98 n=1 Tax=Talaromyces atroroseus TaxID=1441469 RepID=A0A225B120_9EURO	Hsp100	0	0.00552133	0.999985	GH6	0	0	0
AF_DN33087_c0_g1	OKL63497 cds supercontig:ASM190759v1:scaffold_1:1382556:1383194:-1 gene:UA08_01554 gene_biotype:protein_coding transcript_biotype:protein_coding description:hypothetical protein	0	86.067	0.126735	0.0803571	8.31508	Ascomycota	Pathogenesis associated protein Cap20	UniRef90_A0A1Q5QC18 Uncharacterized protein n=1 Tax=Talaromyces atroroseus TaxID=1441469 RepID=A0A1Q5QC18_9EURO	No hit	0.0533613	0.0345645	0.997977	No hit	0	0	0
AF_DN66085_c0_g1	OKL55751 cds supercontig:ASM190759v1:scaffold_17:164601:165499:1 gene:UA08_09014 gene_biotype:protein_coding transcript_biotype:protein_coding description:60S ribosomal protein L10-A	1e-140	77.1144	0	0.040179	6.90348	Ascomycota	NA	UniRef90_A0A1Y1NPB0 Uncharacterized protein (Fragment) n=1 Tax=Photinus pyralis TaxID=7054 RepID=A0A1Y1NPB0_PHOPY	No hit	0	0.0190517	0.999818	No hit	0	0	0
AF_DN66852_c0_g1	OKL59547 cds supercontig:ASM190759v1:scaffold_6:1266149:1267332:-1 gene:UA08_05359 gene_biotype:protein_coding transcript_biotype:protein_coding description:60S ribosomal protein L15	2e-137	92.9664	0	0.05486	6.56774	Ascomycota	Ribosomal protein L15 (Fragment)	UniRef90_A0A179GQF2 Ribosomal protein L15 n=2 Tax=Purpureocillium lilacinum TaxID=33203 RepID=A0A179GQF2_9HYPO	No hit	0	0.0263796	0.999652	No hit	0	0	0
AF_DN76358_c0_g1	KFX47730 cds supercontig:ASM75011v1:scf014:380265:381578:1 gene:GQ26_0141340 gene_biotype:protein_coding transcript_biotype:protein_coding description:60S ribosomal protein L10a	4e-86	74.4526	0	0	6.50773	Ascomycota	NA	UniRef90_A0A2H6K8Q1 Short-chain dehydrogenase, putative n=1 Tax=Babesia ovata TaxID=189622 RepID=A0A2H6K8Q1_9APIC	No hit	0	0	1	No hit	0	0	0
AF_DN35224_c0_g1	OKL57327 cds supercontig:ASM190759v1:scaffold_11:538873:540328:1 gene:UA08_07477 gene_biotype:protein_coding transcript_biotype:protein_coding description:Acyl-CoA desaturase	0	87.5817	0	0	6.21318	Ascomycota	Acyl-CoA desaturase	UniRef90_B8M3X2 Acyl-CoA desaturase n=5 Tax=Eurotiales TaxID=5042 RepID=B8M3X2_TALSN	No hit	0	0	1	No hit	0	0	0
AF_DN74931_c0_g1	OKL63142 cds supercontig:ASM190759v1:scaffold_1:772140:776205:1 gene:UA08_01357 gene_biotype:protein_coding transcript_biotype:protein_coding description:hypothetical protein	0	81.2749	0	0	6.18392	Ascomycota	Catalase A	UniRef90_B8M4R0 Catalase n=4 Tax=Eurotiales TaxID=5042 RepID=B8M4R0_TALSN	No hit	0	0	1	No hit	0	0	0
AF_DN29347_c0_g1	OKL63695 cds supercontig:ASM190759v1:scaffold_0:2025090:2026416:-1 gene:UA08_00717 gene_biotype:protein_coding transcript_biotype:protein_coding description:Transaldolase	3e-147	91.1458	0	0	6.14396	Ascomycota	Transaldolase (Fragment)	UniRef90_B8MD42 Transaldolase n=7 Tax=Eurotiales TaxID=5042 RepID=B8MD42_TALSN	No hit	0	0	1	No hit	0	0	0
AF_DN36984_c0_g1	OKL63695 cds supercontig:ASM190759v1:scaffold_0:2025090:2026416:-1 gene:UA08_00717 gene_biotype:protein_coding transcript_biotype:protein_coding description:Transaldolase	7e-174	77.6515	0	0.0580357	6.09889	Ascomycota	Transaldolase	UniRef90_B8MD42 Transaldolase n=7 Tax=Eurotiales TaxID=5042 RepID=B8MD42_TALSN	No hit	0	0.0287717	0.999586	No hit	SP(Sec/SPI)	0	0
AF_DN38153_c0_g1	OKL57175 cds supercontig:ASM190759v1:scaffold_11:1206545:1207666:-1 gene:UA08_07705 gene_biotype:protein_coding transcript_biotype:protein_coding description:hypothetical protein	0	77.5641	0	0	6.04301	Ascomycota	SWIRM domain	UniRef90_A0A225ARV4 Uncharacterized protein n=1 Tax=Talaromyces atroroseus TaxID=1441469 RepID=A0A225ARV4_9EURO	No hit	0	0	1	No hit	0	0	0
AF_DN3358_c0_g1	OKL64496 cds supercontig:ASM190759v1:scaffold_0:1681620:1683020:-1 gene:UA08_00601 gene_biotype:protein_coding transcript_biotype:protein_coding description:hypothetical protein	0	83.9593	0	0	6.02906	Ascomycota	Eukaryotic aspartyl protease	UniRef90_A0A225BAS2 Uncharacterized protein n=1 Tax=Talaromyces atroroseus TaxID=1441469 RepID=A0A225BAS2_9EURO	No hit	0	0	1	No hit	0	0	0
AF_DN39815_c0_g1	OKL59140 cds supercontig:ASM190759v1:scaffold_7:863751:865117:-1 gene:UA08_05769 gene_biotype:protein_coding transcript_biotype:protein_coding description:Protein ecm33	0	76.1662	0	0.0071628	5.94296	Ascomycota	GPI-anchored cell wall organization protein Ecm33	UniRef90_A0A225AEZ4 Protein ecm33 n=1 Tax=Talaromyces atroroseus TaxID=1441469 RepID=A0A225AEZ4_9EURO	No hit	0	0.00368329	0.999993	No hit	SP(Sec/SPI)	0	0
AF_DN52265_c0_g1	GAM40208 cds supercontig:TcelY94_1.0:DF933834.1:227722:229970:1 gene:TCE0_038f12371 gene_biotype:protein_coding transcript_biotype:protein_coding description:mitochondrial matrix ATPase subunit	4e-176	81.7326	0	0	5.6917	Ascomycota	NA	UniRef90_B8MC54 Mitochondrial Hsp70 chaperone (Ssc70), putative n=11 Tax=Eurotiales TaxID=5042 RepID=B8MC54_TALSN	Hsp70	0	0	1	No hit	0	0	0
AF_DN83507_c0_g1	OKL62836 cds supercontig:ASM190759v1:scaffold_1:2932106:2932682:-1 gene:UA08_02105 gene_biotype:protein_coding transcript_biotype:protein_coding description:Histone H2A	6e-88	76.3333	0	0.066543	5.62516	Ascomycota	NA	No hits	No hit	0	0.0340505	0.99942	No hit	0	0	0
AF_DN39500_c0_g1	OKL64301 cds supercontig:ASM190759v1:scaffold_0:2569299:2571461:-1 gene:UA08_00912 gene_biotype:protein_coding transcript_biotype:protein_coding description:hypothetical protein	0	79.0522	0	0	5.5297	Ascomycota	Transcriptional regulator	UniRef90_A0A225ARU3 Uncharacterized protein n=1 Tax=Talaromyces atroroseus TaxID=1441469 RepID=A0A225ARU3_9EURO	No hit	0	0	1	No hit	0	0	0
AF_DN66321_c0_g1	KFX45164 cds supercontig:ASM75011v1:scf024:78283:80497:-1 gene:GQ26_0240250 gene_biotype:protein_coding transcript_biotype:protein_coding description:30 kDa heat shock protein	0	87.6437	0.0639024	0	5.43121	Ascomycota	Response to stress	UniRef90_A0A2H3IPC9 Complex 1 LYR protein n=1 Tax=Penicillium occitanis TaxID=290292 RepID=A0A2H3IPC9_9EURO	ACD	0.0332638	0	0.999447	No hit	0	0	0
AF_DN73454_c0_g1	CRG87685 cds supercontig:PIS:WF-38-12_scaffold00003:3246570:3247913:-1 gene:PISL3812_04705 gene_biotype:protein_coding transcript_biotype:protein_coding description:transaldolase	3e-62	70.6553	0	0	5.06772	Ascomycota	NA	UniRef90_A0A163CE82 Transaldolase n=2 Tax=Didymellaceae TaxID=683158 RepID=A0A163CE82_DIDRA	No hit	0	0	1	No hit	0	0	0
AF_DN13029_c0_g1	OKL64486 cds supercontig:ASM190759v1:scaffold_0:2463517:2464324:1 gene:UA08_00876 gene_biotype:protein_coding transcript_biotype:protein_coding description:hypothetical protein	6e-131	79.0436	0	0.0129764	5.06694	Ascomycota	50S ribosomal protein L25	UniRef90_A0A225BAR7 Uncharacterized protein n=1 Tax=Talaromyces atroroseus TaxID=1441469 RepID=A0A225BAR7_9EURO	No hit	0	0.00715121	0.999974	No hit	0	0	0
AF_DN12866_c0_g1	CRG86793 cds supercontig:PIS:WF-38-12_scaffold00003:447985:450465:1 gene:PISL3812_03805 gene_biotype:protein_coding transcript_biotype:protein_coding description:ATP-dependent RNA helicase DDX5/DBP2	3e-81	83.8188	0	0	4.93102	Ascomycota	ATP-dependent RNA helicase DBP2	UniRef90_R7YS32 ATP-dependent RNA helicase dbp2 n=1 Tax=Coniosporium apollinis (strain CBS 100218) TaxID=1168221 RepID=R7YS32_CONA1	No hit	0	0	1	No hit	0	gnl|TC-DB|O00571|1.I.1.1.3 ATP-dependent RNA helicase DDX3X OS=Homo sapiens GN=DDX3X PE=1 SV=3	70.8738
AF_DN42085_c0_g1	OKL62662 cds supercontig:ASM190759v1:scaffold_1:1598230:1599547:-1 gene:UA08_01633 gene_biotype:protein_coding transcript_biotype:protein_coding description:hypothetical protein	0	81.9277	0	0.00915037	4.79816	Ascomycota	Negative regulator of sexual conjugation and meiosis	UniRef90_A0A1Q5Q9Q2 Uncharacterized protein n=1 Tax=Talaromyces atroroseus TaxID=1441469 RepID=A0A1Q5Q9Q2_9EURO	No hit	0	0.0051826	0.999987	No hit	0	0	0
AF_DN30351_c0_g1	OKL59440 cds supercontig:ASM190759v1:scaffold_6:1097301:1098758:1 gene:UA08_05299 gene_biotype:protein_coding transcript_biotype:protein_coding description:Mitochondrial protein import protein mas5	0	89.0511	0.0056778	0.00399833	4.76735	Ascomycota	Chaperone protein dnaJ	UniRef90_B8MH32 Protein mitochondrial targeting protein (Mas1), putative n=6 Tax=Eurotiales TaxID=5042 RepID=B8MH32_TALSN	DnaJ	0.00323117	0.00227731	0.999992	No hit	0	0	0
AF_DN40617_c0_g1	EED12493 cds supercontig:JCVI-TSTA1-3.0:scf_1105507295517:1358504:1360124:1 gene:TSTA_005300 gene_biotype:protein_coding transcript_biotype:protein_coding description:NAD-dependent formate dehydrogenase AciA/Fdh	1e-158	79.8875	0	0.0114972	4.75695	Ascomycota	Formate dehydrogenase-II	UniRef90_A0A1C1CPU4 Formate dehydrogenase n=14 Tax=Eukaryota TaxID=2759 RepID=A0A1C1CPU4_9EURO	No hit	0	0.0065307	0.999979	No hit	0	0	0
AF_DN103301_c0_g1	OKL59831 cds supercontig:ASM190759v1:scaffold_5:22769:24405:1 gene:UA08_04461 gene_biotype:protein_coding transcript_biotype:protein_coding description:Adenosylhomocysteinase	1e-55	77.3913	0	0.0500243	4.24605	Ascomycota	NA	UniRef90_A0A1Y1LUS9 Uncharacterized protein (Fragment) n=1 Tax=Photinus pyralis TaxID=7054 RepID=A0A1Y1LUS9_PHOPY	No hit	0	0.0294377	0.999567	No hit	0	0	0
AF_DN23211_c0_g1	OKL59150 cds supercontig:ASM190759v1:scaffold_7:937800:938521:-1 gene:UA08_05796 gene_biotype:protein_coding transcript_biotype:protein_coding description:hypothetical protein	2e-114	73.4649	0	0	4.22547	Ascomycota	DDHD domain-containing protein	UniRef90_B8LTP6 Uncharacterized protein n=5 Tax=Eurotiales TaxID=5042 RepID=B8LTP6_TALSN	No hit	0	0	1	No hit	0	0	0
AF_DN16804_c0_g1	OKL59656 cds supercontig:ASM190759v1:scaffold_6:584586:586746:1 gene:UA08_05136 gene_biotype:protein_coding transcript_biotype:protein_coding description:ATP-dependent molecular chaperone HSC82	9e-72	79.8851	0	0	4.20698	Ascomycota	NA	UniRef90_A0A1E2YFR4 Hsp90-like protein n=3 Tax=Paracoccidioides brasiliensis TaxID=121759 RepID=A0A1E2YFR4_PARBR	Hsp90	0	0	1	No hit	0	gnl|TC-DB|P08238|8.A.163.1.1 Heat shock protein HSP 90-beta OS=Homo sapiens OX=9606 GN=HSP90AB1 PE=1 SV=4	72.4138
AF_DN36508_c0_g1	KFX42926 cds supercontig:ASM75011v1:scf039:25145:29852:-1 gene:GQ26_0390080 gene_biotype:protein_coding transcript_biotype:protein_coding description:Elongation factor 3	5e-105	80.9211	0	0	4.03535	Ascomycota	NA	UniRef90_A0A0D2BBY2 Uncharacterized protein n=1 Tax=Verruconis gallopava TaxID=253628 RepID=A0A0D2BBY2_9PEZI	No hit	0	0	1	No hit	0	0	0
AF_DN32619_c0_g1	OKL56715 cds supercontig:ASM190759v1:scaffold_12:1005951:1006495:-1 gene:UA08_08031 gene_biotype:protein_coding transcript_biotype:protein_coding description:Multiprotein-bridging factor 1	6e-174	90.0212	0	0	4.02514	Ascomycota	Multiprotein-bridging factor	UniRef90_B8MTC2 Coactivator bridging factor 1 (Mbf1), putative n=6 Tax=Eurotiales TaxID=5042 RepID=B8MTC2_TALSN	No hit	0	0	1	No hit	0	0	0
AF_DN4696_c0_g1	EED20181 cds supercontig:JCVI-TSTA1-3.0:scf_1105507295541:2944117:2946532:1 gene:TSTA_034210 gene_biotype:protein_coding transcript_biotype:protein_coding description:casein kinase I, putative	3e-101	88.5522	0	0	4.01424	Ascomycota	NA	No hits	No hit	0	0	1	No hit	0	0	0
AF_DN1448_c0_g1	OKL59968 cds supercontig:ASM190759v1:scaffold_5:448051:449837:1 gene:UA08_04614 gene_biotype:protein_coding transcript_biotype:protein_coding description:hypothetical protein	7e-93	87.4317	0	0	4.01253	Ascomycota	NA	UniRef90_A0A225ARR1 Uncharacterized protein n=1 Tax=Talaromyces atroroseus TaxID=1441469 RepID=A0A225ARR1_9EURO	No hit	0	0	1	No hit	0	0	0
AF_DN36560_c0_g1	OKL63864 cds supercontig:ASM190759v1:scaffold_0:1770424:1771647:1 gene:UA08_00630 gene_biotype:protein_coding transcript_biotype:protein_coding description:hypothetical protein	0	85.6094	0	0	3.96378	Ascomycota	Metal homeostatis protein bsd2	UniRef90_A0A225AZI4 Uncharacterized protein n=1 Tax=Talaromyces atroroseus TaxID=1441469 RepID=A0A225AZI4_9EURO	No hit	0	0	1	No hit	0	0	0
AF_DN9065_c0_g1	KFX43457 cds supercontig:ASM75011v1:scf035:130210:133304:-1 gene:GQ26_0350530 gene_biotype:protein_coding transcript_biotype:protein_coding description:Casein kinase I like hhp1	3e-173	74.7191	0	0.025108	3.92528	Ascomycota	Casein kinase I isoform delta, variant 6	UniRef90_R0JXL1 Uncharacterized protein n=1 Tax=Setosphaeria turcica (strain 28A) TaxID=671987 RepID=R0JXL1_SETT2	No hit	0	0.0155515	0.999879	No hit	0	0	0
AF_DN28151_c0_g1	OKL56175 cds supercontig:ASM190759v1:scaffold_14:595513:598446:1 gene:UA08_08565 gene_biotype:protein_coding transcript_biotype:protein_coding description:Phosphoenolpyruvate carboxykinase	1e-135	89.3229	0	0	3.91633	Ascomycota	NA	UniRef90_B8LTJ2 Phosphoenolpyruvate carboxykinase AcuF n=4 Tax=Eurotiales TaxID=5042 RepID=B8LTJ2_TALSN	No hit	0	0	1	No hit	0	0	0
AF_DN606_c0_g1	OKL63142 cds supercontig:ASM190759v1:scaffold_1:772140:776205:1 gene:UA08_01357 gene_biotype:protein_coding transcript_biotype:protein_coding description:hypothetical protein	0	84.6995	0	0	3.89028	Ascomycota	NA	UniRef90_A0A1Q5QB27 Catalase n=1 Tax=Talaromyces atroroseus TaxID=1441469 RepID=A0A1Q5QB27_9EURO	No hit	0	0	1	No hit	0	0	0
AF_DN74548_c0_g1	CRG83845 cds supercontig:PIS:WF-38-12_scaffold00001:3837531:3838763:-1 gene:PISL3812_01201 gene_biotype:protein_coding transcript_biotype:protein_coding description:hypothetical protein	0	75.6979	0	0	3.83399	Ascomycota	Vegetative cell wall protein gp1	UniRef90_A0A225AKD6 Uncharacterized protein n=1 Tax=Talaromyces atroroseus TaxID=1441469 RepID=A0A225AKD6_9EURO	No hit	0	0	1	No hit	0	0	0
AF_DN92814_c0_g1	OKL57302 cds supercontig:ASM190759v1:scaffold_11:949888:952008:-1 gene:UA08_07611 gene_biotype:protein_coding transcript_biotype:protein_coding description:hypothetical protein	2e-97	82.6667	0	0	3.78271	Ascomycota	NA	UniRef90_A0A225A9B2 Uncharacterized protein n=1 Tax=Talaromyces atroroseus TaxID=1441469 RepID=A0A225A9B2_9EURO	No hit	0	0	1	No hit	0	0	0
AF_DN38719_c1_g1	OKL55751 cds supercontig:ASM190759v1:scaffold_17:164601:165499:1 gene:UA08_09014 gene_biotype:protein_coding transcript_biotype:protein_coding description:60S ribosomal protein L10-A	1e-125	87.3737	0.0372403	0	3.77272	Ascomycota	Large subunit ribosomal protein L10e	UniRef90_F8QWZ3 60S ribosomal protein L10-B n=1 Tax=Endocarpon pusillum TaxID=364733 RepID=F8QWZ3_9EURO	No hit	0.0233881	0	0.999726	No hit	0	0	0
AF_DN108625_c0_g1	EEA24041 cds supercontig:JCVI-PMFA1-2.0:scf_1105668340960:1061962:1063439:1 gene:PMAA_080590 gene_biotype:protein_coding transcript_biotype:protein_coding description:aspartic endopeptidase(AP1), putative	8e-42	77.8878	0	0	3.72573	Ascomycota	NA	UniRef90_A0A225BAS2 Uncharacterized protein n=1 Tax=Talaromyces atroroseus TaxID=1441469 RepID=A0A225BAS2_9EURO	No hit	0	0	1	No hit	0	0	0
AF_DN83149_c0_g1	OKL56541 cds supercontig:ASM190759v1:scaffold_13:702754:703959:1 gene:UA08_08281 gene_biotype:protein_coding transcript_biotype:protein_coding description:Cytochrome c peroxidase, mitochondrial	0	89.3186	0	0	3.71451	Ascomycota	Cytochrome c peroxidase, mitochondrial	UniRef90_A0A225A7C7 Peroxidase n=1 Tax=Talaromyces atroroseus TaxID=1441469 RepID=A0A225A7C7_9EURO	No hit	0	0	1	AA2(103-347)	0	0	0
AF_DN54862_c0_g1	KFX49628 cds supercontig:ASM75011v1:scf009:636101:637186:1 gene:GQ26_0092260 gene_biotype:protein_coding transcript_biotype:protein_coding description:40S ribosomal protein S9	2e-102	78.0702	0	0.340031	3.7048	Ascomycota	40s ribosomal protein s9	UniRef90_E3S128 Uncharacterized protein n=2 Tax=Pyrenophora TaxID=5027 RepID=E3S128_PYRTT	No hit	0	0.185718	0.982603	No hit	0	0	0
AF_DN41115_c0_g1	CRG89027 cds supercontig:PIS:WF-38-12_scaffold00005:1662413:1665692:-1 gene:PISL3812_06062 gene_biotype:protein_coding transcript_biotype:protein_coding description:elongation factor EF-3	1e-91	82.5397	0	0	3.69103	Ascomycota	NA	UniRef90_A0A0D2BBY2 Uncharacterized protein n=1 Tax=Verruconis gallopava TaxID=253628 RepID=A0A0D2BBY2_9PEZI	No hit	0	0	1	No hit	0	0	0
AF_DN23232_c0_g1	OKL56505 cds supercontig:ASM190759v1:scaffold_13:840853:841868:1 gene:UA08_08326 gene_biotype:protein_coding transcript_biotype:protein_coding description:14-3-3 protein-like protein	2e-163	93.4896	0	0.073932	3.6836	Ascomycota	NA	UniRef90_A0A093V7H3 14-3-3 protein like n=4 Tax=Eurotiales TaxID=5042 RepID=A0A093V7H3_TALMA	No hit	0	0.0461448	0.998935	No hit	0	gnl|TC-DB|P48349|8.A.98.1.8 14-3-3-like protein GF14 lambda OS=Arabidopsis thaliana GN=GRF6 PE=1 SV=1	85.9375
AF_DN80926_c0_g1	OKL57528 cds supercontig:ASM190759v1:scaffold_10:838322:839691:1 gene:UA08_07090 gene_biotype:protein_coding transcript_biotype:protein_coding description:hypothetical protein	1e-124	93.7908	0	0	3.66448	Ascomycota	NA	UniRef90_A0A093UZM4 Single-stranded TG1-3 DNA-binding protein n=5 Tax=Eurotiales TaxID=5042 RepID=A0A093UZM4_TALMA	No hit	0	0	1	No hit	0	0	0
AF_DN108195_c0_g1	OKL57074 cds supercontig:ASM190759v1:scaffold_11:901547:903700:1 gene:UA08_07597 gene_biotype:protein_coding transcript_biotype:protein_coding description:ATP-dependent RNA helicase dbp2	8e-143	86.715	0	0	3.64841	Ascomycota	NA	UniRef90_B8M8Q3 RNA helicase (Dbp), putative n=5 Tax=Talaromyces TaxID=5094 RepID=B8M8Q3_TALSN	No hit	0	0	1	No hit	0	0	0
AF_DN55107_c0_g1	KFX41993 cds supercontig:ASM75011v1:scf051:131840:133468:-1 gene:GQ26_0510510 gene_biotype:protein_coding transcript_biotype:protein_coding description:putative formate dehydrogenase	4e-97	70.132	0.048687	0	3.60868	Ascomycota	NA	No hits	No hit	0.031098	0	0.999516	No hit	0	0	0
AF_DN38094_c0_g1	OKL63832 cds supercontig:ASM190759v1:scaffold_0:2203501:2206008:-1 gene:UA08_00776 gene_biotype:protein_coding transcript_biotype:protein_coding description:Heat shock protein hsp88	0	87.787	0	0	3.59017	Ascomycota	Heat shock protein (Eurofung)	UniRef90_B8M2F7 Hsp70 chaperone Hsp88 n=4 Tax=Eurotiales TaxID=5042 RepID=B8M2F7_TALSN	Hsp70	0	0	1	No hit	0	0	0
AF_DN33367_c0_g1	EED21245 cds supercontig:JCVI-TSTA1-3.0:scf_1105507295527:1195634:1196900:1 gene:TSTA_084760 gene_biotype:protein_coding transcript_biotype:protein_coding description:mitochondrial phosphate carrier protein (Mir1), putative	3e-77	81.4516	0	0	3.58471	Ascomycota	NA	UniRef90_A0A1Y1NCW5 Uncharacterized protein (Fragment) n=1 Tax=Photinus pyralis TaxID=7054 RepID=A0A1Y1NCW5_PHOPY	No hit	0	0	1	No hit	0	0	0
AF_DN83464_c0_g1	OKL64278 cds supercontig:ASM190759v1:scaffold_0:660537:662414:-1 gene:UA08_00233 gene_biotype:protein_coding transcript_biotype:protein_coding description:hypothetical protein	2e-154	82.2006	0	0	3.57251	Ascomycota	NA	UniRef90_A0A225B3J1 Uncharacterized protein n=1 Tax=Talaromyces atroroseus TaxID=1441469 RepID=A0A225B3J1_9EURO	No hit	0	0	1	No hit	0	0	0
AF_DN56802_c0_g1	KFX40791 cds supercontig:ASM75011v1:scf099:2494:5555:-1 gene:GQ26_0990020 gene_biotype:protein_coding transcript_biotype:protein_coding description:Catalase-peroxidase	3e-104	75.9615	0	0	3.56018	Ascomycota	Peroxidase	UniRef90_A0A1Q5Q6N7 Catalase-peroxidase n=1 Tax=Talaromyces atroroseus TaxID=1441469 RepID=A0A1Q5Q6N7_9EURO	No hit	0	0	1	No hit	0	0	0
AF_DN24779_c1_g1	EEA28230 cds supercontig:JCVI-PMFA1-2.0:scf_1105668340764:4121455:4123995:1 gene:PMAA_030470 gene_biotype:protein_coding transcript_biotype:protein_coding description:Hsp70 chaperone BiP/Kar2, putative	9e-37	76.324	0	0	3.55462	Ascomycota	Heat shock protein 70 (Fragment)	UniRef90_A0A177BZM0 Heat shock protein 70b n=2 Tax=Paraphaeosphaeria TaxID=125369 RepID=A0A177BZM0_9PLEO	Hsp70	0	0	1	No hit	0	gnl|TC-DB|P11021|1.A.33.1.5 78 kDa glucose-regulated protein OS=Homo sapiens GN=HSPA5 PE=1 SV=2	75.7009
AF_DN38742_c0_g1	KFX42926 cds supercontig:ASM75011v1:scf039:25145:29852:-1 gene:GQ26_0390080 gene_biotype:protein_coding transcript_biotype:protein_coding description:Elongation factor 3	3e-150	79.085	0	0	3.54104	Ascomycota	NA	UniRef90_A0A0N1P068 Elongation factor 3 n=1 Tax=Phialophora attae TaxID=1664694 RepID=A0A0N1P068_9EURO	No hit	0	0	1	No hit	0	0	0
AF_DN76667_c0_g1	OKL61603 cds supercontig:ASM190759v1:scaffold_3:2156321:2157580:1 gene:UA08_03773 gene_biotype:protein_coding transcript_biotype:protein_coding description:60S ribosomal protein L8-B	9e-112	86.2745	0	0.0974427	3.51219	Ascomycota	60S ribosomal protein L8-A	UniRef90_A0A1Y1ZSR6 60S ribosomal protein L8-B n=1 Tax=Clohesyomyces aquaticus TaxID=1231657 RepID=A0A1Y1ZSR6_9PLEO	No hit	0	0.0615923	0.998101	No hit	0	0	0
AF_DN73491_c0_g1	OKL61448 cds supercontig:ASM190759v1:scaffold_3:654686:656634:-1 gene:UA08_03275 gene_biotype:protein_coding transcript_biotype:protein_coding description:hypothetical protein	0	79.9785	0	0.00883573	3.50172	Ascomycota	Basic-leucine zipper domain	UniRef90_A0A225AVX1 Uncharacterized protein n=1 Tax=Talaromyces atroroseus TaxID=1441469 RepID=A0A225AVX1_9EURO	No hit	0	0.00584713	0.999983	No hit	0	0	0
AF_DN18357_c0_g1	KFX46304 cds supercontig:ASM75011v1:scf019:131405:133466:1 gene:GQ26_0190540 gene_biotype:protein_coding transcript_biotype:protein_coding description:6-phosphogluconate dehydrogenase,decarboxylating 2	1e-135	88.9744	0	0	3.472	Ascomycota	NA	UniRef90_A0A1L9X225 6-phosphogluconate dehydrogenase, decarboxylating n=1 Tax=Aspergillus aculeatus ATCC 16872 TaxID=690307 RepID=A0A1L9X225_ASPAC	No hit	0	0	1	No hit	0	0	0
AF_DN54652_c0_g1	OKL56553 cds supercontig:ASM190759v1:scaffold_13:882344:883760:1 gene:UA08_08343 gene_biotype:protein_coding transcript_biotype:protein_coding description:putative glycosidase crf2	0	80.6977	0.0089475	0	3.45756	Ascomycota	Murein transglycosylase	UniRef90_A0A225ACF8 Putative glycosidase crf2 n=1 Tax=Talaromyces atroroseus TaxID=1441469 RepID=A0A225ACF8_9EURO	No hit	0.00595981	0	0.999982	GH16(83-269)	SP(Sec/SPI)	0	0
AF_DN96950_c0_g1	OKL56720 cds supercontig:ASM190759v1:scaffold_12:1019510:1020799:-1 gene:UA08_08036 gene_biotype:protein_coding transcript_biotype:protein_coding description:hypothetical protein	5e-149	92.0765	0	0	3.42091	Ascomycota	NA	UniRef90_B8MTB5 Translational initiation factor 2 beta n=8 Tax=Eurotiales TaxID=5042 RepID=B8MTB5_TALSN	No hit	0	0	1	No hit	0	0	0
AF_DN104318_c0_g1	EEA27497 cds supercontig:JCVI-PMFA1-2.0:scf_1105668340764:2278668:2281055:1 gene:PMAA_023720 gene_biotype:protein_coding transcript_biotype:protein_coding description:zinc knuckle transcription factor/splicing factor MSL5/ZFM1, putative	3e-116	88.9908	0	0	3.40558	Ascomycota	NA	UniRef90_A0A2H3J197 Zinc finger, CCHC-type n=1 Tax=Penicillium occitanis TaxID=290292 RepID=A0A2H3J197_9EURO	No hit	0	0	1	No hit	0	0	0
AF_DN36735_c0_g1	OKL56991 cds supercontig:ASM190759v1:scaffold_12:48544:52948:-1 gene:UA08_07717 gene_biotype:protein_coding transcript_biotype:protein_coding description:hypothetical protein	0	82.5816	0	0	3.39645	Ascomycota	Adventurous-gliding motility protein Z	UniRef90_A0A225A8C1 Uncharacterized protein n=1 Tax=Talaromyces atroroseus TaxID=1441469 RepID=A0A225A8C1_9EURO	No hit	0	0	1	No hit	0	0	0
AF_DN70377_c0_g1	KFX49935 cds supercontig:ASM75011v1:scf008:346553:348459:-1 gene:GQ26_0081350 gene_biotype:protein_coding transcript_biotype:protein_coding description:ATP-dependent RNA helicase eIF4A	3e-117	82.0675	0	0	3.25586	Ascomycota	ATP-dependent RNA helicase eIF4A (Fragment)	UniRef90_A0A0G2G591 Putative eukaryotic translation initiation factor n=1 Tax=Phaeomoniella chlamydospora TaxID=158046 RepID=A0A0G2G591_9EURO	No hit	0	0	1	No hit	0	gnl|TC-DB|P38919|3.A.18.1.1 Eukaryotic initiation factor 4A-III - Homo sapiens (Human).	84.1772
AF_DN74406_c0_g1	CRG87685 cds supercontig:PIS:WF-38-12_scaffold00003:3246570:3247913:-1 gene:PISL3812_04705 gene_biotype:protein_coding transcript_biotype:protein_coding description:transaldolase	3e-133	78.0656	0	0.0218347	3.15102	Ascomycota	NA	UniRef90_K8APR3 Uncharacterized protein n=1 Tax=Cronobacter muytjensii 530 TaxID=1208586 RepID=K8APR3_9ENTR	No hit	0	0.0151735	0.999885	No hit	0	0	0
AF_DN64171_c0_g1	OKL61721 cds supercontig:ASM190759v1:scaffold_2:852002:852778:-1 gene:UA08_02447 gene_biotype:protein_coding transcript_biotype:protein_coding description:hypothetical protein	3e-87	78.2369	0	0	3.13347	Ascomycota	NA	UniRef90_B6QE59 Uncharacterized protein n=4 Tax=Eurotiales TaxID=5042 RepID=B6QE59_TALMQ	No hit	0	0	1	No hit	0	0	0
AF_DN56917_c0_g1	OKL56678 cds supercontig:ASM190759v1:scaffold_13:601517:602692:1 gene:UA08_08250 gene_biotype:protein_coding transcript_biotype:protein_coding description:hypothetical protein	0	87.5283	0	0	3.1211	Ascomycota	Bacilysin biosynthesis oxidoreductase bacC	UniRef90_A0A225AHW3 Uncharacterized protein n=2 Tax=Eurotiales TaxID=5042 RepID=A0A225AHW3_9EURO	No hit	0	0	1	No hit	0	0	0
AF_DN18256_c1_g1	OKL59071 cds supercontig:ASM190759v1:scaffold_7:1181474:1182002:1 gene:UA08_05847 gene_biotype:protein_coding transcript_biotype:protein_coding description:Autophagy-related protein 8	1e-80	80.5797	0	0	3.12101	Ascomycota	Autophagy-related protein 8	UniRef90_A0A2L2U2U0 Autophagy-related protein n=1 Tax=Fusarium venenatum TaxID=56646 RepID=A0A2L2U2U0_9HYPO	No hit	0	0	1	No hit	0	gnl|TC-DB|A8MS84|9.A.15.3.1 Autophagy-related protein OS=Arabidopsis thaliana GN=APG8A PE=3 SV=1	80
AF_DN16549_c0_g1	OKL64283 cds supercontig:ASM190759v1:scaffold_0:680616:681521:1 gene:UA08_00238 gene_biotype:protein_coding transcript_biotype:protein_coding description:hypothetical protein	5e-156	84.2014	0	0	3.1036	Ascomycota	Hsp90 binding co-chaperone	UniRef90_B8MBP3 Hsp90 binding co-chaperone (Sba1), putative n=2 Tax=Talaromyces stipitatus (strain ATCC 10500 / CBS 375.48/ QM 6759 / NRRL 1006) TaxID=441959 RepID=B8MBP3_TALSN	No hit	0	0	1	No hit	0	0	0
AF_DN29991_c0_g1	OKL55348 cds supercontig:ASM190759v1:scaffold_21:5491:8691:-1 gene:UA08_09331 gene_biotype:protein_coding transcript_biotype:protein_coding description:Elongation factor 3	2e-80	77.6119	0	0	3.0799	Ascomycota	NA	UniRef90_R7YP62 Elongation factor 3 n=1 Tax=Coniosporium apollinis (strain CBS 100218) TaxID=1168221 RepID=R7YP62_CONA1	No hit	0	0	1	No hit	0	0	0
AF_DN97831_c0_g1	OKL60265 cds supercontig:ASM190759v1:scaffold_5:1170487:1171227:-1 gene:UA08_04858 gene_biotype:protein_coding transcript_biotype:protein_coding description:Inorganic phosphate transport protein PHO88	4e-167	79.4118	0	0	3.05633	Ascomycota	Inorganic phosphate transporter	UniRef90_B8LXQ2 Phosphate transporter (Pho88), putative n=5 Tax=Eurotiales TaxID=5042 RepID=B8LXQ2_TALSN	No hit	0	0	1	No hit	0	0	0
AF_DN4525_c0_g1	OKL55348 cds supercontig:ASM190759v1:scaffold_21:5491:8691:-1 gene:UA08_09331 gene_biotype:protein_coding transcript_biotype:protein_coding description:Elongation factor 3	0	86.0215	0	0	3.03908	Ascomycota	NA	UniRef90_B8MIV4 Translation elongation factor eEF-3, putative n=6 Tax=Eurotiales TaxID=5042 RepID=B8MIV4_TALSN	No hit	0	0	1	No hit	0	0	0
AF_DN76800_c0_g1	OKL63527 cds supercontig:ASM190759v1:scaffold_1:2498498:2499646:1 gene:UA08_01947 gene_biotype:protein_coding transcript_biotype:protein_coding description:hypothetical protein	2e-67	80.1223	0	0	3.02672	Ascomycota	NA	UniRef90_A0A1Q5QC47 Uncharacterized protein n=1 Tax=Talaromyces atroroseus TaxID=1441469 RepID=A0A1Q5QC47_9EURO	No hit	0	0	1	No hit	0	0	0
AF_DN86788_c0_g1	EEA25227 cds supercontig:JCVI-PMFA1-2.0:scf_1105668340758:470729:472163:-1 gene:PMAA_063460 gene_biotype:protein_coding transcript_biotype:protein_coding description:GTP-binding nuclear protein Ran, putative	3e-117	85.049	0	0	3.0201	Ascomycota	GTP-binding nuclear protein (Fragment)	UniRef90_A0A2H3ELB8 GTP-binding nuclear protein n=1 Tax=Diplocarpon rosae TaxID=946125 RepID=A0A2H3ELB8_9HELO	No hit	0	0	1	No hit	0	gnl|TC-DB|P32835|9.A.50.1.1 GTP-binding nuclear protein GSP1/CNR1 OS=Saccharomyces cerevisiae GN=GSP1 PE=1 SV=1	95.5882
AF_DN76162_c0_g1	GAM43354 cds supercontig:TcelY94_1.0:DF933843.1:759636:761153:1 gene:TCE0_047f18094 gene_biotype:protein_coding transcript_biotype:protein_coding description:hypothetical protein	5e-144	94.0476	0	0	3.01458	Ascomycota	NA	UniRef90_A0A0L0NF04 Uncharacterized protein n=1 Tax=Tolypocladium ophioglossoides CBS 100239 TaxID=1163406 RepID=A0A0L0NF04_9HYPO	No hit	0	0	1	No hit	0	0	0
AF_DN35125_c0_g1	KFX42926 cds supercontig:ASM75011v1:scf039:25145:29852:-1 gene:GQ26_0390080 gene_biotype:protein_coding transcript_biotype:protein_coding description:Elongation factor 3	2e-96	74.4536	0	0	3.00596	Ascomycota	NA	UniRef90_H6C2Q6 Elongation factor EF-3 n=16 Tax=Herpotrichiellaceae TaxID=43219 RepID=H6C2Q6_EXODN	No hit	0	0	1	No hit	0	0	0
AF_DN101517_c0_g1	OKL56097 cds supercontig:ASM190759v1:scaffold_15:267955:270715:-1 gene:UA08_08668 gene_biotype:protein_coding transcript_biotype:protein_coding description:hypothetical protein	7e-160	82.9346	0	0	2.98772	Ascomycota	HMG-box variant	UniRef90_B6QB80 DUF1014 domain protein n=2 Tax=Talaromyces marneffei TaxID=37727 RepID=B6QB80_TALMQ	No hit	0	0	1	No hit	0	0	0
AF_DN71645_c0_g1	OKL60266 cds supercontig:ASM190759v1:scaffold_5:1168088:1169528:-1 gene:UA08_04857 gene_biotype:protein_coding transcript_biotype:protein_coding description:Glyceraldehyde-3-phosphate dehydrogenase	1e-90	85.5346	0	0	2.97047	Ascomycota	Glyceraldehyde-3-phosphate dehydrogenase, type I (Fragment)	UniRef90_A0A150VFD1 Glyceraldehyde-3-phosphate dehydrogenase n=1 Tax=Acidomyces richmondensis BFW TaxID=766039 RepID=A0A150VFD1_9PEZI	No hit	0	0	1	No hit	0	gnl|TC-DB|B3ET62|3.A.23.6.1 Glyceraldehyde-3-phosphate dehydrogenase OS=Amoebophilus asiaticus (strain 5a2) GN=Aasi_1069 PE=3 SV=1	71.6981
AF_DN69547_c0_g1	OKL62204 cds supercontig:ASM190759v1:scaffold_2:887213:889892:1 gene:UA08_02457 gene_biotype:protein_coding transcript_biotype:protein_coding description:Eukaryotic translation initiation factor 3 subunit C	4e-115	89.1892	0	0	2.9306	Ascomycota	NA	UniRef90_B8MAY1 Eukaryotic translation initiation factor 3 subunit C n=6 Tax=Eurotiales TaxID=5042 RepID=B8MAY1_TALSN	No hit	0	0	1	No hit	0	0	0
AF_DN94100_c0_g1	EED15029 cds supercontig:JCVI-TSTA1-3.0:scf_1105507295515:1268883:1269931:-1 gene:TSTA_044930 gene_biotype:protein_coding transcript_biotype:protein_coding description:autophagic death protein Aut7/IDI-7, putative	5e-69	82.3529	0	0	2.91703	Ascomycota	Autophagy-related protein 8	UniRef90_A0A2L2U2U0 Autophagy-related protein n=1 Tax=Fusarium venenatum TaxID=56646 RepID=A0A2L2U2U0_9HYPO	No hit	0	0	1	No hit	0	gnl|TC-DB|A8MS84|9.A.15.3.1 Autophagy-related protein OS=Arabidopsis thaliana GN=APG8A PE=3 SV=1	83.3333
AF_DN56127_c0_g1	OKL63186 cds supercontig:ASM190759v1:scaffold_1:2312365:2316402:-1 gene:UA08_01887 gene_biotype:protein_coding transcript_biotype:protein_coding description:hypothetical protein	2e-72	81.8182	0	0	2.91017	Ascomycota	NA	UniRef90_A0A2H3ICT4 CheY-like superfamily n=1 Tax=Penicillium occitanis TaxID=290292 RepID=A0A2H3ICT4_9EURO	No hit	0	0	1	No hit	0	0	0
AF_DN8522_c0_g1	OKL56326 cds supercontig:ASM190759v1:scaffold_14:126307:128511:1 gene:UA08_08398 gene_biotype:protein_coding transcript_biotype:protein_coding description:glucose-regulated protein-like protein	1e-150	91.3386	0	0	2.90046	Ascomycota	NA	UniRef90_P83616 Endoplasmic reticulum chaperone BiP n=35 Tax=Aspergillaceae TaxID=1131492 RepID=BIP_ASPNG	Hsp70	0	0	1	No hit	0	gnl|TC-DB|P11021|1.A.33.1.5 78 kDa glucose-regulated protein OS=Homo sapiens GN=HSPA5 PE=1 SV=2	92.9134
AF_DN75283_c0_g1	EED13209 cds supercontig:JCVI-TSTA1-3.0:scf_1105507295487:1363078:1366494:1 gene:TSTA_057050 gene_biotype:protein_coding transcript_biotype:protein_coding description:translation elongation factor EF-2 subunit, putative	7e-89	80.1802	0	0.0165786	2.86732	Ascomycota	Elongation factor 2	UniRef90_W2RPU4 Elongation factor 2 n=2 Tax=Chaetothyriales TaxID=34395 RepID=W2RPU4_9EURO	No hit	0	0.0121558	0.999926	No hit	0	0	0
AF_DN78587_c0_g1	EED23669 cds supercontig:JCVI-TSTA1-3.0:scf_1105507295523:3113423:3115026:1 gene:TSTA_070760 gene_biotype:protein_coding transcript_biotype:protein_coding description:GPI-anchored cell wall organization protein Ecm33	0	88.019	0	0	2.84698	Ascomycota	GPI-anchored cell wall organization protein Ecm33	UniRef90_B8LTS7 GPI-anchored cell wall organization protein Ecm33 n=2 Tax=Eurotiales TaxID=5042 RepID=B8LTS7_TALSN	No hit	0	0	1	No hit	0	0	0
AF_DN36099_c1_g1	EED24552 cds supercontig:JCVI-TSTA1-3.0:scf_1105507295523:5313439:5315346:-1 gene:TSTA_079090 gene_biotype:protein_coding transcript_biotype:protein_coding description:glyceraldehyde 3-phosphate dehydrogenase GpdA	3e-147	86.0606	0	0	2.84543	Ascomycota	Glyceraldehyde 3-phosphate dehydrogenase	UniRef90_A0A1Y2LVC8 Glyceraldehyde-3-phosphate dehydrogenase n=1 Tax=Epicoccum nigrum TaxID=105696 RepID=A0A1Y2LVC8_EPING	No hit	0	0	1	No hit	0	gnl|TC-DB|B3ET62|3.A.23.6.1 Glyceraldehyde-3-phosphate dehydrogenase OS=Amoebophilus asiaticus (strain 5a2) GN=Aasi_1069 PE=3 SV=1	70.303
AF_DN83721_c0_g1	KFX52508 cds supercontig:ASM75011v1:scf003:981577:982270:1 gene:GQ26_0033570 gene_biotype:protein_coding transcript_biotype:protein_coding description:Thioredoxin-2	4e-95	74.0741	0	0	2.80988	Ascomycota	NA	No hits	No hit	0	0	1	No hit	0	0	0
AF_DN85204_c0_g1	KFX44083 cds supercontig:ASM75011v1:scf030:34641:36252:1 gene:GQ26_0300140 gene_biotype:protein_coding transcript_biotype:protein_coding description:Thiamine thiazole synthase	9e-37	74.6177	0	0	2.76242	Ascomycota	NA	No hits	No hit	0	0	1	No hit	0	0	0
AF_DN40426_c0_g1	OKL63596 cds supercontig:ASM190759v1:scaffold_1:2663818:2664934:-1 gene:UA08_02015 gene_biotype:protein_coding transcript_biotype:protein_coding description:hypothetical protein	2e-170	86.9048	0	0.0191146	2.7488	Ascomycota	Winged helix-turn-helix transcription repressor DNA-binding	UniRef90_A0A232M775 Uncharacterized protein n=1 Tax=Elaphomyces granulatus TaxID=519963 RepID=A0A232M775_9EURO	No hit	0	0.0143271	0.999897	No hit	0	0	0
AF_DN18971_c0_g1	OKL59454 cds supercontig:ASM190759v1:scaffold_6:555611:556360:1 gene:UA08_05126 gene_biotype:protein_coding transcript_biotype:protein_coding description:hypothetical protein	5e-177	81.4077	0	0	2.73502	Ascomycota	NA	UniRef90_A0A225AMA2 Uncharacterized protein n=1 Tax=Talaromyces atroroseus TaxID=1441469 RepID=A0A225AMA2_9EURO	No hit	0	0	1	No hit	0	0	0
AF_DN74615_c0_g1	EED14405 cds supercontig:JCVI-TSTA1-3.0:scf_1105507295511:2452382:2453573:-1 gene:TSTA_106140 gene_biotype:protein_coding transcript_biotype:protein_coding description:glutathione peroxidase Hyr1, putative	3e-31	72.2222	0	0	2.71482	Ascomycota	Glutathione peroxidase	UniRef90_A0A177CR94 Multifunctional fusion protein n=1 Tax=Paraphaeosphaeria sporulosa TaxID=1460663 RepID=A0A177CR94_9PLEO	No hit	0	0	1	No hit	0	0	0
AF_DN25179_c0_g1	OKL60628 cds supercontig:ASM190759v1:scaffold_4:593510:595787:1 gene:UA08_04086 gene_biotype:protein_coding transcript_biotype:protein_coding description:Branchpoint-bridging protein	0	84.7746	0	0.00804903	2.71169	Ascomycota	Branchpoint-bridging protein, variant	UniRef90_A0A2H3J197 Zinc finger, CCHC-type n=1 Tax=Penicillium occitanis TaxID=290292 RepID=A0A2H3J197_9EURO	No hit	0	0.00611265	0.999981	No hit	0	0	0
AF_DN65363_c0_g1	EED24181 cds supercontig:JCVI-TSTA1-3.0:scf_1105507295523:4379950:4381116:-1 gene:TSTA_075530 gene_biotype:protein_coding transcript_biotype:protein_coding description:eukaryotic translation elongation factor 1 subunit Eef1-beta, putative	4e-137	71.8519	0	0	2.68959	Ascomycota	Translation elongation factor 1 subunit beta	UniRef90_A0A1L9SRQ0 Uncharacterized protein n=1 Tax=Penicilliopsis zonata CBS 506.65 TaxID=1073090 RepID=A0A1L9SRQ0_9EURO	No hit	0	0	1	No hit	SP(Sec/SPI)	0	0
AF_DN5440_c0_g1	KFX49243 cds supercontig:ASM75011v1:scf010:676120:678758:-1 gene:GQ26_0102360 gene_biotype:protein_coding transcript_biotype:protein_coding description:Kelch-like protein 38	4e-139	94.5513	0	0	2.67966	Ascomycota	NA	UniRef90_A0A093XVF7 Kelch-like protein 38 n=4 Tax=Eurotiales TaxID=5042 RepID=A0A093XVF7_TALMA	No hit	0	0	1	No hit	0	0	0
AF_DN97119_c0_g1	EEA27939 cds supercontig:JCVI-PMFA1-2.0:scf_1105668340764:3347947:3349528:1 gene:PMAA_027760 gene_biotype:protein_coding transcript_biotype:protein_coding description:bZIP transcription factor (MetR), putative	5e-75	77.23	0	0	2.67528	Ascomycota	Regulatory protein cys-3	UniRef90_A0A225AES4 Uncharacterized protein n=1 Tax=Talaromyces atroroseus TaxID=1441469 RepID=A0A225AES4_9EURO	No hit	0	0	1	No hit	0	0	0
AF_DN103518_c0_g1	KFX43286 cds supercontig:ASM75011v1:scf036:33356:35327:1 gene:GQ26_0360170 gene_biotype:protein_coding transcript_biotype:protein_coding description:1,3-beta-glucanosyltransferase gel4	4e-130	87.7863	0	0	2.67113	Ascomycota	NA	UniRef90_A0A2H3IDH9 1,3-beta-glucanosyltransferase n=1 Tax=Penicillium occitanis TaxID=290292 RepID=A0A2H3IDH9_9EURO	No hit	0	0	1	No hit	0	0	0
AF_DN65748_c0_g1	EED12864 cds supercontig:JCVI-TSTA1-3.0:scf_1105507295487:469059:470233:1 gene:TSTA_053780 gene_biotype:protein_coding transcript_biotype:protein_coding description:60S ribosomal protein L32	1e-110	87.2464	0.0575673	0.0393433	2.65727	Ascomycota	Ribosomal protein L32	UniRef90_H6BKR7 60S ribosomal protein L32 n=22 Tax=Chaetothyriales TaxID=34395 RepID=H6BKR7_EXODN	No hit	0.0431047	0.0297183	0.998628	No hit	0	0	0
AF_DN27674_c0_g1	OKL57288 cds supercontig:ASM190759v1:scaffold_11:824531:826189:1 gene:UA08_07566 gene_biotype:protein_coding transcript_biotype:protein_coding description:hypothetical protein	0	88.2902	0	0.00676923	2.64571	Ascomycota	Zinc finger and BTB domain-containing protein	UniRef90_A0A225AJG2 Uncharacterized protein n=1 Tax=Talaromyces atroroseus TaxID=1441469 RepID=A0A225AJG2_9EURO	No hit	0	0.00521535	0.999986	No hit	0	0	0
AF_DN107515_c0_g1	KFX41793 cds supercontig:ASM75011v1:scf053:45:4515:1 gene:GQ26_0530010 gene_biotype:protein_coding transcript_biotype:protein_coding description:Serine/threonine-protein kinase ksp1	2e-165	81.1066	0	0	2.61805	Ascomycota	NA	UniRef90_A0A225B3J1 Uncharacterized protein n=1 Tax=Talaromyces atroroseus TaxID=1441469 RepID=A0A225B3J1_9EURO	No hit	0	0	1	No hit	0	0	0
AF_DN88327_c0_g1	CRG87101 cds supercontig:PIS:WF-38-12_scaffold00003:1438037:1441939:-1 gene:PISL3812_04116 gene_biotype:protein_coding transcript_biotype:protein_coding description:60S ribosomal protein L2	6e-64	79.7222	0	0	2.61746	Ascomycota	60S ribosomal protein L2	UniRef90_C8VN22 Uncharacterized protein n=24 Tax=leotiomyceta TaxID=716546 RepID=C8VN22_EMENI	No hit	0	0	1	No hit	0	0	0
AF_DN82990_c0_g1	OKL60080 cds supercontig:ASM190759v1:scaffold_5:1400267:1401276:-1 gene:UA08_04944 gene_biotype:protein_coding transcript_biotype:protein_coding description:hypothetical protein	0	79.3522	0	0	2.60187	Ascomycota	NA	UniRef90_A0A194V5F5 Uncharacterized protein n=1 Tax=Valsa mali var. pyri TaxID=694573 RepID=A0A194V5F5_9PEZI	No hit	0	0	1	No hit	0	0	0
AF_DN56553_c0_g1	OKL63540 cds supercontig:ASM190759v1:scaffold_1:372449:374127:1 gene:UA08_01209 gene_biotype:protein_coding transcript_biotype:protein_coding description:putative UTP--glucose-1-phosphate uridylyltransferase	0	91.2014	0	0	2.5992	Ascomycota	NA	UniRef90_B6Q7U6 UTP--glucose-1-phosphate uridylyltransferase n=8 Tax=Eurotiales TaxID=5042 RepID=B6Q7U6_TALMQ	No hit	0	0	1	No hit	0	0	0
AF_DN83161_c0_g1	OKL61637 cds supercontig:ASM190759v1:scaffold_3:1136500:1137557:-1 gene:UA08_03433 gene_biotype:protein_coding transcript_biotype:protein_coding description:Thiamine thiazole synthase	0	89.9187	0	0	2.59578	Ascomycota	Thiamine thiazole synthase	UniRef90_B8M1K3 Thiamine thiazole synthase n=6 Tax=Eurotiales TaxID=5042 RepID=B8M1K3_TALSN	No hit	0	0	1	No hit	0	0	0
AF_DN88928_c0_g1	OKL60626 cds supercontig:ASM190759v1:scaffold_4:599768:602135:-1 gene:UA08_04088 gene_biotype:protein_coding transcript_biotype:protein_coding description:hypothetical protein	8e-117	86.6667	0	0	2.59326	Ascomycota	40S ribosomal protein S7	UniRef90_G0RJ19 40S ribosomal protein S7 n=42 Tax=Fungi TaxID=4751 RepID=G0RJ19_HYPJQ	No hit	0	0	1	No hit	0	0	0
AF_DN55274_c0_g1	OKL63347 cds supercontig:ASM190759v1:scaffold_1:1323595:1325956:-1 gene:UA08_01531 gene_biotype:protein_coding transcript_biotype:protein_coding description:hypothetical protein	0	80.671	0	0.0061781	2.58352	Ascomycota	NA	UniRef90_A0A1Q5QBL8 Uncharacterized protein n=1 Tax=Talaromyces atroroseus TaxID=1441469 RepID=A0A1Q5QBL8_9EURO	No hit	0	0.00482551	0.999988	No hit	0	0	0
AF_DN61347_c0_g1	KFX43015 cds supercontig:ASM75011v1:scf038:489:2154:-1 gene:GQ26_0380010 gene_biotype:protein_coding transcript_biotype:protein_coding description:Small COPII coat GTPase sar1	1e-130	87.8553	0	0	2.55853	Ascomycota	NA	No hits	No hit	0	0	1	No hit	0	0	0
AF_DN55080_c0_g1	OKL58756 cds supercontig:ASM190759v1:scaffold_7:334769:336606:-1 gene:UA08_05582 gene_biotype:protein_coding transcript_biotype:protein_coding description:hypothetical protein	0	82.2945	0.0100972	0	2.54671	Ascomycota	Cruciform DNA-recognizing protein 1	UniRef90_A0A225AUV0 Uncharacterized protein n=1 Tax=Talaromyces atroroseus TaxID=1441469 RepID=A0A225AUV0_9EURO	No hit	0.0079353	0	0.999969	No hit	0	0	0
AF_DN83421_c0_g1	OKL64476 cds supercontig:ASM190759v1:scaffold_0:853469:854287:1 gene:UA08_00295 gene_biotype:protein_coding transcript_biotype:protein_coding description:hypothetical protein	2e-153	87.0246	0	0	2.50254	Ascomycota	Had superfamily	UniRef90_A0A225BAQ8 Uncharacterized protein n=2 Tax=Talaromyces TaxID=5094 RepID=A0A225BAQ8_9EURO	No hit	0	0	1	No hit	0	0	0
AF_DN106266_c0_g1	EED15616 cds supercontig:JCVI-TSTA1-3.0:scf_1105507295515:2731326:2734900:-1 gene:TSTA_050550 gene_biotype:protein_coding transcript_biotype:protein_coding description:translation elongation factor eEF-3, putative	6e-59	78.5908	0	0	2.50237	Ascomycota	Translation elongation factor 3 (Fragment)	UniRef90_A0A0D2E1E2 Uncharacterized protein n=3 Tax=Exophiala TaxID=5583 RepID=A0A0D2E1E2_9EURO	No hit	0	0	1	No hit	0	0	0
AF_DN102534_c0_g1	GAM42203 cds supercontig:TcelY94_1.0:DF933839.1:860599:861930:-1 gene:TCE0_043r15951 gene_biotype:protein_coding transcript_biotype:protein_coding description:bZIP transcription factor	0	88.9447	0	0	2.50062	Ascomycota	NA	UniRef90_A0A0B8N4N0 BZIP transcription factor n=1 Tax=Talaromyces cellulolyticus TaxID=1472165 RepID=A0A0B8N4N0_9EURO	No hit	0	0	1	No hit	0	0	0
AF_DN85694_c0_g1	OKL56544 cds supercontig:ASM190759v1:scaffold_13:708353:710398:-1 gene:UA08_08284 gene_biotype:protein_coding transcript_biotype:protein_coding description:hypothetical protein	3e-142	87.9747	0	0	2.47733	Ascomycota	NA	UniRef90_B8ME74 C2H2 transcription factor (Seb1), putative n=1 Tax=Talaromyces stipitatus (strain ATCC 10500 / CBS 375.48/ QM 6759 / NRRL 1006) TaxID=441959 RepID=B8ME74_TALSN	No hit	0	0	1	No hit	0	0	0
AF_DN76742_c0_g1	OKL58051 cds supercontig:ASM190759v1:scaffold_9:865709:868658:-1 gene:UA08_06686 gene_biotype:protein_coding transcript_biotype:protein_coding description:Elongation factor 2	2e-113	83.4483	0	0	2.4759	Ascomycota	NA	UniRef90_D5GER4 Uncharacterized protein n=1 Tax=Tuber melanosporum (strain Mel28) TaxID=656061 RepID=D5GER4_TUBMM	No hit	0	0	1	No hit	0	0	0
AF_DN102701_c0_g1	OKL62936 cds supercontig:ASM190759v1:scaffold_1:2881784:2883453:-1 gene:UA08_02086 gene_biotype:protein_coding transcript_biotype:protein_coding description:hypothetical protein	5e-74	79.2398	0	0	2.46568	Ascomycota	NA	UniRef90_A0A1Q5QAH7 Uncharacterized protein n=1 Tax=Talaromyces atroroseus TaxID=1441469 RepID=A0A1Q5QAH7_9EURO	No hit	0	0	1	No hit	0	0	0
AF_DN20113_c0_g1	GAM43501 cds supercontig:TcelY94_1.0:DF933846.1:397175:399707:1 gene:TCE0_050f18365 gene_biotype:protein_coding transcript_biotype:protein_coding description:hypothetical protein	1e-87	79.8851	0	0	2.46102	Ascomycota	NA	UniRef90_A0A093VJI2 Adhesion defective protein 3 n=1 Tax=Talaromyces marneffei PM1 TaxID=1077442 RepID=A0A093VJI2_TALMA	No hit	0	0	1	No hit	0	0	0
AF_DN106692_c0_g1	KFX51324 cds supercontig:ASM75011v1:scf005:426144:429615:-1 gene:GQ26_0051480 gene_biotype:protein_coding transcript_biotype:protein_coding description:Cell division control protein 48	5e-89	83.1832	0	0	2.43983	Ascomycota	NA	UniRef90_A0A0L1I1Z8 Cell division control protein 48 n=20 Tax=Dothideomycetes TaxID=147541 RepID=A0A0L1I1Z8_9PLEO	No hit	0	0	1	No hit	0	gnl|TC-DB|P25694|3.A.16.1.2 Cell division control protein 48 - Saccharomyces cerevisiae (Baker's yeast).	90.991
AF_DN13198_c0_g1	OKL58442 cds supercontig:ASM190759v1:scaffold_8:678467:682296:1 gene:UA08_06181 gene_biotype:protein_coding transcript_biotype:protein_coding description:DNA-directed RNA polymerase II subunit RPB2	3e-172	92.2535	0	0	2.42424	Ascomycota	DNA-directed RNA polymerase II subunit RPB2	UniRef90_A0A1F7ZKY3 DNA-directed RNA polymerase subunit beta n=2 Tax=Aspergillus TaxID=5052 RepID=A0A1F7ZKY3_9EURO	No hit	0	0	1	No hit	0	0	0
AF_DN56576_c0_g1	EED19974 cds supercontig:JCVI-TSTA1-3.0:scf_1105507295541:2445570:2448121:-1 gene:TSTA_032300 gene_biotype:protein_coding transcript_biotype:protein_coding description:F-box and WD40 domain protein, putative	5e-90	81.6794	0	0	2.39688	Ascomycota	NA	UniRef90_A0A1Q5Q979 Uncharacterized protein n=1 Tax=Talaromyces atroroseus TaxID=1441469 RepID=A0A1Q5Q979_9EURO	No hit	0	0	1	No hit	0	0	0
AF_DN55548_c0_g1	OKL57074 cds supercontig:ASM190759v1:scaffold_11:901547:903700:1 gene:UA08_07597 gene_biotype:protein_coding transcript_biotype:protein_coding description:ATP-dependent RNA helicase dbp2	3e-152	89.7619	0	0	2.38709	Ascomycota	NA	UniRef90_A0A232LQE0 Uncharacterized protein n=1 Tax=Elaphomyces granulatus TaxID=519963 RepID=A0A232LQE0_9EURO	No hit	0	0	1	No hit	0	0	0
AF_DN64982_c0_g1	OKL59344 cds supercontig:ASM190759v1:scaffold_6:654307:655441:-1 gene:UA08_05158 gene_biotype:protein_coding transcript_biotype:protein_coding description:hypothetical protein	0	85.3376	0	0	2.38047	Ascomycota	Nucleotide-binding, alpha-beta plait	UniRef90_B8MFL2 Transformer-SR ribonucleoprotein, putative n=4 Tax=Eurotiales TaxID=5042 RepID=B8MFL2_TALSN	No hit	0	0	1	No hit	0	0	0
AF_DN74535_c0_g1	OKL62781 cds supercontig:ASM190759v1:scaffold_1:1471668:1472603:-1 gene:UA08_01589 gene_biotype:protein_coding transcript_biotype:protein_coding description:TATA-box-binding protein	6e-109	81.203	0	0	2.37051	Ascomycota	TATA box binding transcription initiation factor TFIID-1	UniRef90_A0A177CWC6 Transcription initiation factor-like protein n=1 Tax=Paraphaeosphaeria sporulosa TaxID=1460663 RepID=A0A177CWC6_9PLEO	No hit	0	0	1	No hit	0	0	0
AF_DN55552_c0_g1	OKL61968 cds supercontig:ASM190759v1:scaffold_2:1231024:1235872:1 gene:UA08_02566 gene_biotype:protein_coding transcript_biotype:protein_coding description:hypothetical protein	1e-94	84.4884	0	0	2.35936	Ascomycota	NA	UniRef90_A0A0U1M6X7 Eukaryotic translation initiation factor 4 gamma n=1 Tax=Talaromyces islandicus TaxID=28573 RepID=A0A0U1M6X7_TALIS	No hit	0	0	1	No hit	0	0	0
AF_DN84121_c0_g1	EEA24116 cds supercontig:JCVI-PMFA1-2.0:scf_1105668340960:1259607:1262557:-1 gene:PMAA_081270 gene_biotype:protein_coding transcript_biotype:protein_coding description:vacuolar dynamin-like GTPase VpsA, putative	3e-127	82.2785	0	0	2.35564	Ascomycota	NA	UniRef90_B8MBF5 Vacuolar dynamin-like GTPase VpsA, putative n=4 Tax=Eurotiales TaxID=5042 RepID=B8MBF5_TALSN	No hit	0	0	1	No hit	0	gnl|TC-DB|P21576|9.A.63.1.1 Vacuolar protein sorting-associated protein 1 OS=Saccharomyces cerevisiae (strain ATCC 204508/ S288c) GN=VPS1 PE=1 SV=2	85.443
AF_DN86179_c0_g1	CRG84151 cds supercontig:PIS:WF-38-12_scaffold00001:4720963:4723736:-1 gene:PISL3812_01476 gene_biotype:protein_coding transcript_biotype:protein_coding description:transitional endoplasmic reticulum ATPase	5e-95	81.5385	0	0	2.33092	Ascomycota	NA	UniRef90_A0A0L1I1Z8 Cell division control protein 48 n=20 Tax=Dothideomycetes TaxID=147541 RepID=A0A0L1I1Z8_9PLEO	Hsp100	0	0	1	No hit	0	gnl|TC-DB|P25694|3.A.16.1.2 Cell division control protein 48 - Saccharomyces cerevisiae (Baker's yeast).	96.1538
AF_DN27537_c0_g1	EED15998 cds supercontig:JCVI-TSTA1-3.0:scf_1105507295549:649133:652092:1 gene:TSTA_011120 gene_biotype:protein_coding transcript_biotype:protein_coding description:Hsp70 chaperone(HscA), putative	2e-150	82.439	0	0	2.3193	Ascomycota	Heat shock protein SSB	UniRef90_G2WTH8 Heat shock protein sks2 n=7 Tax=Verticillium TaxID=1036719 RepID=G2WTH8_VERDV	Hsp70	0	0	1	No hit	0	0	0
AF_DN23416_c0_g1	OKL62781 cds supercontig:ASM190759v1:scaffold_1:1471668:1472603:-1 gene:UA08_01589 gene_biotype:protein_coding transcript_biotype:protein_coding description:TATA-box-binding protein	5e-139	90.7246	0	0	2.31555	Ascomycota	TATA-box binding protein	UniRef90_B8M7G9 RNA polymerase I and III transcription factor complex component Tbp, putative n=29 Tax=leotiomyceta TaxID=716546 RepID=B8M7G9_TALSN	No hit	0	0	1	No hit	0	0	0
AF_DN67589_c0_g1	OKL60080 cds supercontig:ASM190759v1:scaffold_5:1400267:1401276:-1 gene:UA08_04944 gene_biotype:protein_coding transcript_biotype:protein_coding description:hypothetical protein	1e-120	79.5062	0	0	2.31533	Ascomycota	NA	UniRef90_A0A254U614 Dioxygenase family protein n=1 Tax=Aspergillus niger TaxID=5061 RepID=A0A254U614_ASPNG	No hit	0	0	1	No hit	0	0	0
AF_DN33173_c0_g1	OKL60775 cds supercontig:ASM190759v1:scaffold_4:1646958:1649577:1 gene:UA08_04441 gene_biotype:protein_coding transcript_biotype:protein_coding description:hypothetical protein	0	77.4481	0	0	2.29672	Ascomycota	NA	UniRef90_B6Q8Z7 Uncharacterized protein n=1 Tax=Talaromyces marneffei (strain ATCC 18224 / CBS 334.59 / QM 7333) TaxID=441960 RepID=B6Q8Z7_TALMQ	No hit	0	0	1	No hit	0	0	0
AF_DN28709_c0_g1	OKL58394 cds supercontig:ASM190759v1:scaffold_8:778232:779593:1 gene:UA08_06216 gene_biotype:protein_coding transcript_biotype:protein_coding description:putative RNA-binding protein	1e-145	89.6641	0	0	2.28932	Ascomycota	mRNA binding post-transcriptional regulator	UniRef90_B6QUZ2 mRNA binding post-transcriptional regulator (Csx1), putative n=2 Tax=Talaromyces marneffei TaxID=37727 RepID=B6QUZ2_TALMQ	No hit	0	0	1	No hit	0	0	0
AF_DN104741_c0_g1	KFX43798 cds supercontig:ASM75011v1:scf032:56767:59397:1 gene:GQ26_0320220 gene_biotype:protein_coding transcript_biotype:protein_coding description:Transaldolase	2e-90	77.6423	0	0	2.28834	Ascomycota	Transaldolase	UniRef90_A0A1Y1Z1N0 Transaldolase n=1 Tax=Clohesyomyces aquaticus TaxID=1231657 RepID=A0A1Y1Z1N0_9PLEO	No hit	0	0	1	No hit	0	0	0
AF_DN65415_c0_g1	OKL61186 cds supercontig:ASM190759v1:scaffold_3:1765627:1769582:-1 gene:UA08_03636 gene_biotype:protein_coding transcript_biotype:protein_coding description:hypothetical protein	1e-74	78.5507	0	0	2.2827	Ascomycota	NA	UniRef90_A0A225B1U0 Uncharacterized protein n=1 Tax=Talaromyces atroroseus TaxID=1441469 RepID=A0A225B1U0_9EURO	No hit	0	0	1	No hit	0	0	0
AF_DN77581_c0_g1	OKL59968 cds supercontig:ASM190759v1:scaffold_5:448051:449837:1 gene:UA08_04614 gene_biotype:protein_coding transcript_biotype:protein_coding description:hypothetical protein	2e-89	81.1905	0	0	2.27914	Ascomycota	NA	UniRef90_A0A093XR90 Meiotic expression up-regulated protein 6 n=1 Tax=Talaromyces marneffei PM1 TaxID=1077442 RepID=A0A093XR90_TALMA	No hit	0	0	1	No hit	0	0	0
AF_DN62060_c0_g1	KFX45727 cds supercontig:ASM75011v1:scf022:357066:359842:1 gene:GQ26_0221160 gene_biotype:protein_coding transcript_biotype:protein_coding description:ABC transporter ATP-binding protein ARB1	5e-79	79.1304	0	0	2.27147	Ascomycota	NA	UniRef90_Q0TYW2 Uncharacterized protein n=16 Tax=Pleosporales TaxID=92860 RepID=Q0TYW2_PHANO	No hit	0	0	1	No hit	0	gnl|TC-DB|Q9FJH6|3.A.1.121.10 ABC transporter F family member 1 OS=Arabidopsis thaliana OX=3702 GN=ABCF1 PE=2 SV=1	74.7826
AF_DN83587_c0_g1	GAM43383 cds supercontig:TcelY94_1.0:DF933843.1:842970:844389:-1 gene:TCE0_047r18149 gene_biotype:protein_coding transcript_biotype:protein_coding description:hypothetical protein	1e-165	88.4058	0	0	2.27074	Ascomycota	NA	UniRef90_A0A0B8N719 Uncharacterized protein n=1 Tax=Talaromyces cellulolyticus TaxID=1472165 RepID=A0A0B8N719_9EURO	No hit	0	0	1	No hit	0	0	0
AF_DN93106_c0_g1	OKL62459 cds supercontig:ASM190759v1:scaffold_2:2300476:2302659:1 gene:UA08_02907 gene_biotype:protein_coding transcript_biotype:protein_coding description:ATP-dependent RNA helicase sub2	0	92.0973	0	0.00966023	2.26465	Ascomycota	ATP dependent RNA helicase	UniRef90_A0A093V3Q2 ATP-dependent RNA helicase sub2 n=3 Tax=Talaromyces marneffei TaxID=37727 RepID=A0A093V3Q2_TALMA	No hit	0	0.00812536	0.999967	No hit	0	gnl|TC-DB|Q07478|3.A.22.1.1 ATP-dependent RNA helicase SUB2 OS=Saccharomyces cerevisiae (strain ATCC 204508 / S288c) GN=SUB2 PE=1 SV=1	86.6261
AF_DN70135_c0_g1	OKL55948 cds supercontig:ASM190759v1:scaffold_15:52209:54446:-1 gene:UA08_08602 gene_biotype:protein_coding transcript_biotype:protein_coding description:hypothetical protein	1e-100	79.8054	0	0	2.26206	Ascomycota	NA	UniRef90_A0A225AG35 Uncharacterized protein n=1 Tax=Talaromyces atroroseus TaxID=1441469 RepID=A0A225AG35_9EURO	No hit	0	0	1	No hit	0	0	0
AF_DN86874_c0_g1	OKL63529 cds supercontig:ASM190759v1:scaffold_1:2481545:2493663:-1 gene:UA08_01945 gene_biotype:protein_coding transcript_biotype:protein_coding description:hypothetical protein	5e-135	87.2549	0	0	2.25443	Ascomycota	Cytoskeleton assembly control protein (Fragment)	UniRef90_B8MMU1 Cytoskeleton assembly control protein Sla2, putative n=4 Tax=Eurotiales TaxID=5042 RepID=B8MMU1_TALSN	No hit	0	0	1	No hit	0	0	0
AF_DN67412_c0_g1	OKL60421 cds supercontig:ASM190759v1:scaffold_4:266305:269376:-1 gene:UA08_03975 gene_biotype:protein_coding transcript_biotype:protein_coding description:hypothetical protein	3e-85	82.1053	0	0	2.23967	Ascomycota	NA	UniRef90_A0A1Q5Q8I4 Uncharacterized protein n=1 Tax=Talaromyces atroroseus TaxID=1441469 RepID=A0A1Q5Q8I4_9EURO	No hit	0	0	1	No hit	0	0	0
AF_DN103221_c0_g1	OKL57790 cds supercontig:ASM190759v1:scaffold_10:653003:656352:-1 gene:UA08_07025 gene_biotype:protein_coding transcript_biotype:protein_coding description:hypothetical protein	6e-79	73.8889	0	0	2.23862	Ascomycota	NA	UniRef90_A0A225ABT8 Uncharacterized protein n=1 Tax=Talaromyces atroroseus TaxID=1441469 RepID=A0A225ABT8_9EURO	No hit	0	0	1	No hit	0	0	0
AF_DN98005_c0_g1	CRG87418 cds supercontig:PIS:WF-38-12_scaffold00003:2412171:2413716:1 gene:PISL3812_04435 gene_biotype:protein_coding transcript_biotype:protein_coding description:Septin homolog spn4	4e-65	81.1321	0	0	2.23624	Ascomycota	NA	UniRef90_A0A0D1YY45 Uncharacterized protein n=2 Tax=leotiomyceta TaxID=716546 RepID=A0A0D1YY45_9EURO	No hit	0	0	1	No hit	0	0	0
AF_DN24204_c0_g1	OKL58674 cds supercontig:ASM190759v1:scaffold_8:193803:195499:1 gene:UA08_06029 gene_biotype:protein_coding transcript_biotype:protein_coding description:hypothetical protein	0	87.4525	0	0	2.22313	Ascomycota	HLH transcription factor	UniRef90_A0A225AK54 Uncharacterized protein n=1 Tax=Talaromyces atroroseus TaxID=1441469 RepID=A0A225AK54_9EURO	No hit	0	0	1	No hit	0	0	0
AF_DN26781_c0_g1	OKL56326 cds supercontig:ASM190759v1:scaffold_14:126307:128511:1 gene:UA08_08398 gene_biotype:protein_coding transcript_biotype:protein_coding description:glucose-regulated protein-like protein	7e-174	88.8889	0	0	2.21901	Ascomycota	Heat shock 70kDa protein 5	UniRef90_A0A232M762 Uncharacterized protein n=1 Tax=Elaphomyces granulatus TaxID=519963 RepID=A0A232M762_9EURO	Hsp70	0	0	1	No hit	0	gnl|TC-DB|P11021|1.A.33.1.5 78 kDa glucose-regulated protein OS=Homo sapiens GN=HSPA5 PE=1 SV=2	70.303
AF_DN88021_c0_g1	OKL60742 cds supercontig:ASM190759v1:scaffold_4:1027940:1029069:-1 gene:UA08_04241 gene_biotype:protein_coding transcript_biotype:protein_coding description:hypothetical protein	5e-115	83.3333	0	0	2.21254	Ascomycota	NA	UniRef90_A0A1Q5Q9J5 Uncharacterized protein n=1 Tax=Talaromyces atroroseus TaxID=1441469 RepID=A0A1Q5Q9J5_9EURO	No hit	0	0	1	No hit	0	0	0
AF_DN10736_c0_g1	OKL57375 cds supercontig:ASM190759v1:scaffold_11:1164439:1165450:-1 gene:UA08_07690 gene_biotype:protein_coding transcript_biotype:protein_coding description:GTP-binding protein ypt1	0	92.803	0	0	2.21077	Ascomycota	p-loop containing nucleoside triphosphate hydrolase	UniRef90_A0A2B7YZ35 GTP-binding protein ypt1 n=1 Tax=Emmonsia crescens TaxID=73230 RepID=A0A2B7YZ35_9EURO	No hit	0	0	1	No hit	0	0	0
AF_DN67863_c0_g1	OKL63377 cds supercontig:ASM190759v1:scaffold_1:1751020:1752546:1 gene:UA08_01691 gene_biotype:protein_coding transcript_biotype:protein_coding description:hypothetical protein	6e-88	86.3333	0	0	2.21056	Ascomycota	NA	UniRef90_A0A1Q5QBP6 Uncharacterized protein n=1 Tax=Talaromyces atroroseus TaxID=1441469 RepID=A0A1Q5QBP6_9EURO	No hit	0	0	1	No hit	0	0	0
AF_DN104132_c0_g1	OKL61058 cds supercontig:ASM190759v1:scaffold_3:1289494:1290491:1 gene:UA08_03487 gene_biotype:protein_coding transcript_biotype:protein_coding description:hypothetical protein	3e-120	89.644	0	0	2.20687	Ascomycota	Ran-specific GTPase-activating protein 1 (Fragment)	UniRef90_A0A225AUS9 Uncharacterized protein n=1 Tax=Talaromyces atroroseus TaxID=1441469 RepID=A0A225AUS9_9EURO	No hit	0	0	1	No hit	0	0	0
AF_DN101159_c0_g1	OKL58911 cds supercontig:ASM190759v1:scaffold_7:29934:31319:1 gene:UA08_05469 gene_biotype:protein_coding transcript_biotype:protein_coding description:hypothetical protein	0	83.0247	0	0	2.19242	Ascomycota	Casein kinase II beta 2 subunit	UniRef90_A0A225ACP2 Uncharacterized protein n=1 Tax=Talaromyces atroroseus TaxID=1441469 RepID=A0A225ACP2_9EURO	No hit	0	0	1	No hit	0	0	0
AF_DN89412_c0_g1	OKL59993 cds supercontig:ASM190759v1:scaffold_5:945346:947836:1 gene:UA08_04779 gene_biotype:protein_coding transcript_biotype:protein_coding description:hypothetical protein	8e-144	85.7678	0	0	2.18531	Ascomycota	NA	UniRef90_A0A225AKR4 Uncharacterized protein n=1 Tax=Talaromyces atroroseus TaxID=1441469 RepID=A0A225AKR4_9EURO	No hit	0	0	1	No hit	0	0	0
AF_DN106035_c0_g1	OKL62204 cds supercontig:ASM190759v1:scaffold_2:887213:889892:1 gene:UA08_02457 gene_biotype:protein_coding transcript_biotype:protein_coding description:Eukaryotic translation initiation factor 3 subunit C	2e-102	86.9697	0	0	2.18482	Ascomycota	NA	UniRef90_A0A0U1M6L8 Eukaryotic translation initiation factor 3 subunit C n=1 Tax=Talaromyces islandicus TaxID=28573 RepID=A0A0U1M6L8_TALIS	No hit	0	0	1	No hit	0	0	0
AF_DN6659_c0_g1	OKL61287 cds supercontig:ASM190759v1:scaffold_3:2131481:2134913:1 gene:UA08_03766 gene_biotype:protein_coding transcript_biotype:protein_coding description:hypothetical protein	6e-134	85.8447	0	0	2.18003	Ascomycota	NA	UniRef90_A0A225B5V2 Uncharacterized protein n=1 Tax=Talaromyces atroroseus TaxID=1441469 RepID=A0A225B5V2_9EURO	No hit	0	0	1	No hit	0	0	0
AF_DN75813_c0_g1	EEA24041 cds supercontig:JCVI-PMFA1-2.0:scf_1105668340960:1061962:1063439:1 gene:PMAA_080590 gene_biotype:protein_coding transcript_biotype:protein_coding description:aspartic endopeptidase(AP1), putative	2e-148	86.5342	0	0	2.17812	Ascomycota	Acid protease (Fragment)	UniRef90_A0A2H3J9S0 Peptidase aspartic, catalytic n=1 Tax=Penicillium occitanis TaxID=290292 RepID=A0A2H3J9S0_9EURO	No hit	0	0	1	No hit	0	0	0
AF_DN58650_c0_g1	EED17722 cds supercontig:JCVI-TSTA1-3.0:scf_1105507295555:1132556:1134570:-1 gene:TSTA_115210 gene_biotype:protein_coding transcript_biotype:protein_coding description:glutamine synthetase	0	83.3822	0	0	2.16109	Ascomycota	Glutamine synthetase	UniRef90_B8M9G2 Glutamine synthetase n=6 Tax=Eurotiales TaxID=5042 RepID=B8M9G2_TALSN	No hit	0	0	1	No hit	0	0	0
AF_DN71954_c0_g1	EED13387 cds supercontig:JCVI-TSTA1-3.0:scf_1105507295487:1830867:1833719:-1 gene:TSTA_058750 gene_biotype:protein_coding transcript_biotype:protein_coding description:fumarate reductase Osm1, putative	3e-72	77.208	0	0	2.14194	Ascomycota	NA	UniRef90_B8MQI5 Fumarate reductase Osm1, putative n=4 Tax=Eurotiales TaxID=5042 RepID=B8MQI5_TALSN	No hit	0	0	1	No hit	0	0	0
AF_DN105619_c0_g1	OKL62523 cds supercontig:ASM190759v1:scaffold_2:2511531:2514041:1 gene:UA08_02929 gene_biotype:protein_coding transcript_biotype:protein_coding description:hypothetical protein	1e-173	81.7938	0	0	2.13403	Ascomycota	NA	UniRef90_A0A225ASN9 Uncharacterized protein n=1 Tax=Talaromyces atroroseus TaxID=1441469 RepID=A0A225ASN9_9EURO	No hit	0	0	1	No hit	0	0	0
AF_DN63561_c0_g1	KFX52278 cds supercontig:ASM75011v1:scf003:530269:533247:1 gene:GQ26_0031880 gene_biotype:protein_coding transcript_biotype:protein_coding description:Meiotically up-regulated gene 86 protein	2e-83	82.2222	0	0	2.12673	Ascomycota	NA	UniRef90_A0A2H3IHS4 GPR1/FUN34/yaaH n=1 Tax=Penicillium occitanis TaxID=290292 RepID=A0A2H3IHS4_9EURO	No hit	0	0	1	No hit	0	gnl|TC-DB|Q5B2K4|2.A.96.1.3 Putative uncharacterized protein (Acetate permease) OS=Emericella nidulans GN=acpA PE=4 SV=1	85.8333
AF_DN17427_c0_g1	OKL56175 cds supercontig:ASM190759v1:scaffold_14:595513:598446:1 gene:UA08_08565 gene_biotype:protein_coding transcript_biotype:protein_coding description:Phosphoenolpyruvate carboxykinase	2e-92	84.1121	0	0	2.11952	Ascomycota	Similar to Saccharomyces cerevisiae YKR097W PCK1 Phosphoenolpyruvate carboxykinase, partial (Partial) (Fragment)	UniRef90_Q0CK89 Phosphoenolpyruvate carboxykinase n=8 Tax=Eurotiomycetidae TaxID=451871 RepID=Q0CK89_ASPTN	No hit	0	0	1	No hit	0	0	0
AF_DN19226_c0_g1	OKL62204 cds supercontig:ASM190759v1:scaffold_2:887213:889892:1 gene:UA08_02457 gene_biotype:protein_coding transcript_biotype:protein_coding description:Eukaryotic translation initiation factor 3 subunit C	9e-132	88.2051	0	0	2.11211	Ascomycota	NA	UniRef90_A0A0F4YVP6 Eukaryotic translation initiation factor 3 subunit C n=1 Tax=Rasamsonia emersonii CBS 393.64 TaxID=1408163 RepID=A0A0F4YVP6_TALEM	No hit	0	0	1	No hit	0	0	0
AF_DN93074_c0_g1	OKL55884 cds supercontig:ASM190759v1:scaffold_16:553313:556594:1 gene:UA08_08946 gene_biotype:protein_coding transcript_biotype:protein_coding description:hypothetical protein	3e-173	84.3234	0	0	2.1078	Ascomycota	NA	UniRef90_A0A225AD81 Uncharacterized protein n=1 Tax=Talaromyces atroroseus TaxID=1441469 RepID=A0A225AD81_9EURO	No hit	0	0	1	No hit	0	0	0
AF_DN101438_c0_g1	OKL60112 cds supercontig:ASM190759v1:scaffold_5:659387:660417:-1 gene:UA08_04688 gene_biotype:protein_coding transcript_biotype:protein_coding description:Superoxide dismutase	0	88.4685	0	0	2.09918	Ascomycota	Manganese/iron superoxide dismutase	UniRef90_A0A2H3JA12 Manganese/iron superoxide dismutase n=1 Tax=Penicillium occitanis TaxID=290292 RepID=A0A2H3JA12_9EURO	No hit	0	0	1	No hit	0	0	0
AF_DN77610_c0_g1	OKL63097 cds supercontig:ASM190759v1:scaffold_1:2646792:2648902:-1 gene:UA08_02009 gene_biotype:protein_coding transcript_biotype:protein_coding description:hypothetical protein	2e-103	84.6154	0	0	2.09172	Ascomycota	NA	UniRef90_A0A2H3I0Y0 Winged helix-turn-helix transcription repressor DNA-binding n=5 Tax=Eurotiales TaxID=5042 RepID=A0A2H3I0Y0_9EURO	No hit	0	0	1	No hit	0	0	0
AF_DN7822_c0_g1	OKL59493 cds supercontig:ASM190759v1:scaffold_6:1047261:1050645:1 gene:UA08_05279 gene_biotype:protein_coding transcript_biotype:protein_coding description:Eukaryotic translation initiation factor 3 subunit A	9e-122	88.0759	0	0	2.08745	Ascomycota	NA	UniRef90_A0A0U1M4D1 Eukaryotic translation initiation factor 3 subunit A n=1 Tax=Talaromyces islandicus TaxID=28573 RepID=A0A0U1M4D1_TALIS	No hit	0	0	1	No hit	0	0	0
AF_DN92779_c0_g1	OKL63261 cds supercontig:ASM190759v1:scaffold_1:1723509:1724799:1 gene:UA08_01681 gene_biotype:protein_coding transcript_biotype:protein_coding description:Fructose-bisphosphate aldolase	3e-167	91.2037	0	0	2.07902	Ascomycota	Fructose-bisphosphate aldolase	UniRef90_B8M548 Fructose-bisphosphate aldolase, class II n=4 Tax=Eurotiales TaxID=5042 RepID=B8M548_TALSN	No hit	0	0	1	No hit	0	0	0
AF_DN60163_c0_g1	OKL56887 cds supercontig:ASM190759v1:scaffold_12:980954:983427:1 gene:UA08_08021 gene_biotype:protein_coding transcript_biotype:protein_coding description:hypothetical protein	0	89.2857	0	0	2.04174	Ascomycota	Vacuolar import and degradation protein	UniRef90_A0A093VC07 Vacuolar import and degradation protein 27 (Fragment) n=2 Tax=Talaromyces marneffei PM1 TaxID=1077442 RepID=A0A093VC07_TALMA	No hit	0	0	1	No hit	0	0	0
AF_DN92456_c0_g1	OKL60332 cds supercontig:ASM190759v1:scaffold_4:912115:915924:-1 gene:UA08_04197 gene_biotype:protein_coding transcript_biotype:protein_coding description:hypothetical protein	2e-123	84.2466	0	0	2.04012	Ascomycota	NA	UniRef90_A0A1Q5Q8E1 Uncharacterized protein n=1 Tax=Talaromyces atroroseus TaxID=1441469 RepID=A0A1Q5Q8E1_9EURO	No hit	0	0	1	No hit	0	0	0
AF_DN34051_c0_g1	CRG91660 cds supercontig:PIS:WF-38-12_scaffold00010:557915:560056:1 gene:PISL3812_08710 gene_biotype:protein_coding transcript_biotype:protein_coding description:hypothetical protein	2e-112	87.156	0	0	2.03184	Ascomycota	NA	UniRef90_B8MQI5 Fumarate reductase Osm1, putative n=4 Tax=Eurotiales TaxID=5042 RepID=B8MQI5_TALSN	No hit	0	0	1	No hit	0	0	0
AF_DN74420_c0_g1	EED18184 cds supercontig:JCVI-TSTA1-3.0:scf_1105507295555:2280224:2283115:1 gene:TSTA_119460 gene_biotype:protein_coding transcript_biotype:protein_coding description:serine/threonine protein kinase, putative	2e-105	80.6911	0	0	2.03147	Ascomycota	NA	UniRef90_A0A225B3J1 Uncharacterized protein n=1 Tax=Talaromyces atroroseus TaxID=1441469 RepID=A0A225B3J1_9EURO	No hit	0	0	1	No hit	0	0	0
AF_DN61268_c0_g1	OKL60103 cds supercontig:ASM190759v1:scaffold_5:684741:687277:-1 gene:UA08_04695 gene_biotype:protein_coding transcript_biotype:protein_coding description:Mitochondrial inner membrane i-AAA protease supercomplex subunit	8e-112	87.5362	0	0	2.03119	Ascomycota	NA	UniRef90_A0A225AL17 Mitochondrial inner membrane i-AAA protease supercomplex subunit n=1 Tax=Talaromyces atroroseus TaxID=1441469 RepID=A0A225AL17_9EURO	No hit	0	0	1	No hit	0	0	0
AF_DN102241_c0_g1	OKL61531 cds supercontig:ASM190759v1:scaffold_3:778795:780235:-1 gene:UA08_03316 gene_biotype:protein_coding transcript_biotype:protein_coding description:hypothetical protein	2e-103	87.5	0	0	2.02917	Ascomycota	Deubiquitination-protection protein dph1 (Fragment)	UniRef90_B6QAD3 Ubiquitin-like protein DskB, putative n=3 Tax=Eurotiales TaxID=5042 RepID=B6QAD3_TALMQ	No hit	0	0	1	No hit	0	0	0
AF_DN5505_c0_g1	CRG91532 cds supercontig:PIS:WF-38-12_scaffold00010:181646:186413:-1 gene:PISL3812_08582 gene_biotype:protein_coding transcript_biotype:protein_coding description:putative RNA-binding protein C23E6,01c	1e-115	77.2523	0	0.0174196	2.02705	Ascomycota	mRNA binding post-transcriptional regulator	UniRef90_A0A1Y1ZZX9 Uncharacterized protein n=1 Tax=Clohesyomyces aquaticus TaxID=1231657 RepID=A0A1Y1ZZX9_9PLEO	No hit	0	0.0155902	0.999878	No hit	0	0	0
AF_DN14197_c1_g1	OKL60362 cds supercontig:ASM190759v1:scaffold_4:848968:850023:-1 gene:UA08_04176 gene_biotype:protein_coding transcript_biotype:protein_coding description:hypothetical protein	2e-175	83.5425	0	0	2.02608	Ascomycota	NA	UniRef90_A0A1Q5Q8H4 Uncharacterized protein n=1 Tax=Talaromyces atroroseus TaxID=1441469 RepID=A0A1Q5Q8H4_9EURO	No hit	0	0	1	No hit	0	0	0
AF_DN73772_c0_g1	OKL61483 cds supercontig:ASM190759v1:scaffold_3:1107172:1108745:1 gene:UA08_03424 gene_biotype:protein_coding transcript_biotype:protein_coding description:hypothetical protein	0	84.7025	0	0.00985447	2.01204	Ascomycota	Zinc finger CCCH domain-containing protein 14	UniRef90_A0A225APR2 Uncharacterized protein n=1 Tax=Talaromyces atroroseus TaxID=1441469 RepID=A0A225APR2_9EURO	No hit	0	0.00889323	0.99996	No hit	0	0	0
AF_DN94483_c0_g1	EED18509 cds supercontig:JCVI-TSTA1-3.0:scf_1105507295555:3113153:3114371:-1 gene:TSTA_122420 gene_biotype:protein_coding transcript_biotype:protein_coding description:eukaryotic translation initiation factor 3 subunit EifCg, putative	8e-127	88.9831	0	0	2.00556	Ascomycota	NA	UniRef90_B8MC63 Eukaryotic translation initiation factor 3 subunit G n=7 Tax=Eurotiales TaxID=5042 RepID=B8MC63_TALSN	No hit	0	0	1	No hit	0	0	0
AF_DN59368_c0_g1	OKL64240 cds supercontig:ASM190759v1:scaffold_0:711473:712551:-1 gene:UA08_00251 gene_biotype:protein_coding transcript_biotype:protein_coding description:Cytosolic Fe-S cluster assembly factor nbp35	8e-117	89.6226	0	0	1.99785	Ascomycota	NA	UniRef90_B8MBN4 Cytosolic Fe-S cluster assembly factor NBP35 n=5 Tax=Eurotiales TaxID=5042 RepID=B8MBN4_TALSN	No hit	0	0	1	No hit	0	0	0
AF_DN80854_c0_g1	OKL58501 cds supercontig:ASM190759v1:scaffold_8:276793:279070:1 gene:UA08_06055 gene_biotype:protein_coding transcript_biotype:protein_coding description:hypothetical protein	8e-72	79.9383	0	0	1.99162	Ascomycota	NA	UniRef90_A0A225ABP6 Uncharacterized protein n=1 Tax=Talaromyces atroroseus TaxID=1441469 RepID=A0A225ABP6_9EURO	No hit	0	0	1	No hit	0	0	0
AF_DN10245_c0_g1	OKL58758 cds supercontig:ASM190759v1:scaffold_7:101693:102862:1 gene:UA08_05488 gene_biotype:protein_coding transcript_biotype:protein_coding description:hypothetical protein	7e-160	82.0276	0	0	1.99161	Ascomycota	NADP-dependent oxidoreductase domain	UniRef90_A0A225AN93 Uncharacterized protein n=1 Tax=Talaromyces atroroseus TaxID=1441469 RepID=A0A225AN93_9EURO	No hit	0	0	1	No hit	0	0	0
AF_DN74381_c0_g1	OKL59993 cds supercontig:ASM190759v1:scaffold_5:945346:947836:1 gene:UA08_04779 gene_biotype:protein_coding transcript_biotype:protein_coding description:hypothetical protein	4e-106	81.6456	0	0	1.98344	Ascomycota	NA	UniRef90_A0A225AKR4 Uncharacterized protein n=1 Tax=Talaromyces atroroseus TaxID=1441469 RepID=A0A225AKR4_9EURO	No hit	0	0	1	No hit	0	0	0
AF_DN55459_c0_g1	OKL61965 cds supercontig:ASM190759v1:scaffold_2:1544306:1545333:1 gene:UA08_02669 gene_biotype:protein_coding transcript_biotype:protein_coding description:40S ribosomal protein S1	2e-122	84.9727	0	0	1.97721	Ascomycota	NA	UniRef90_C4XYD4 40S ribosomal protein S3aE n=1 Tax=Clavispora lusitaniae (strain ATCC 42720) TaxID=306902 RepID=C4XYD4_CLAL4	No hit	0	0	1	No hit	0	0	0
AF_DN85874_c0_g1	OKL61253 cds supercontig:ASM190759v1:scaffold_3:988215:993517:1 gene:UA08_03391 gene_biotype:protein_coding transcript_biotype:protein_coding description:hypothetical protein	2e-108	79.9353	0	0	1.97516	Ascomycota	NA	UniRef90_A0A0U1M5Z7 CCR4-NOT transcription complex subunit 4 n=1 Tax=Talaromyces islandicus TaxID=28573 RepID=A0A0U1M5Z7_TALIS	No hit	0	0	1	No hit	0	0	0
AF_DN86215_c0_g1	OKL60408 cds supercontig:ASM190759v1:scaffold_4:354843:359089:1 gene:UA08_04005 gene_biotype:protein_coding transcript_biotype:protein_coding description:hypothetical protein	0	72.5806	0	0	1.97502	Ascomycota	NA	UniRef90_A0A1Q5Q8E7 Uncharacterized protein n=1 Tax=Talaromyces atroroseus TaxID=1441469 RepID=A0A1Q5Q8E7_9EURO	No hit	0	0	1	No hit	0	0	0
AF_DN93919_c0_g1	OKL58432 cds supercontig:ASM190759v1:scaffold_8:566195:567442:1 gene:UA08_06146 gene_biotype:protein_coding transcript_biotype:protein_coding description:hypothetical protein	0	70.781	0	0	1.96849	Ascomycota	Non-viral sialidase	UniRef90_A0A225ABQ1 Uncharacterized protein n=1 Tax=Talaromyces atroroseus TaxID=1441469 RepID=A0A225ABQ1_9EURO	No hit	0	0	1	GH93(149-418)	0	0	0
AF_DN70219_c0_g1	OKL60642 cds supercontig:ASM190759v1:scaffold_4:779202:781445:1 gene:UA08_04150 gene_biotype:protein_coding transcript_biotype:protein_coding description:hypothetical protein	7e-134	85.3333	0	0	1.9627	Ascomycota	NA	UniRef90_A0A1Q5Q996 Uncharacterized protein n=1 Tax=Talaromyces atroroseus TaxID=1441469 RepID=A0A1Q5Q996_9EURO	No hit	0	0	1	No hit	0	0	0
AF_DN21149_c0_g1	OKL59342 cds supercontig:ASM190759v1:scaffold_6:674955:675335:1 gene:UA08_05163 gene_biotype:protein_coding transcript_biotype:protein_coding description:hypothetical protein	2e-108	82.0312	0	0	1.96086	Ascomycota	O-sialoglycoprotein endopeptidase	UniRef90_A0A225ADS3 Uncharacterized protein n=1 Tax=Talaromyces atroroseus TaxID=1441469 RepID=A0A225ADS3_9EURO	No hit	0	0	1	No hit	0	0	0
AF_DN5192_c0_g1	OKL63049 cds supercontig:ASM190759v1:scaffold_1:2690476:2694054:1 gene:UA08_02025 gene_biotype:protein_coding transcript_biotype:protein_coding description:hypothetical protein	0	82.8333	0	0	1.9383	Ascomycota	N-acetyltransferase	UniRef90_A0A1Q5QBA3 Uncharacterized protein n=1 Tax=Talaromyces atroroseus TaxID=1441469 RepID=A0A1Q5QBA3_9EURO	No hit	0	0	1	No hit	0	0	0
AF_DN57284_c0_g1	OKL63540 cds supercontig:ASM190759v1:scaffold_1:372449:374127:1 gene:UA08_01209 gene_biotype:protein_coding transcript_biotype:protein_coding description:putative UTP--glucose-1-phosphate uridylyltransferase	1e-130	92.1212	0	0	1.9312	Ascomycota	NA	UniRef90_B6Q7U6 UTP--glucose-1-phosphate uridylyltransferase n=8 Tax=Eurotiales TaxID=5042 RepID=B6Q7U6_TALMQ	No hit	0	0	1	No hit	0	0	0
AF_DN64841_c0_g1	EED16837 cds supercontig:JCVI-TSTA1-3.0:scf_1105507295549:2833983:2836413:-1 gene:TSTA_019010 gene_biotype:protein_coding transcript_biotype:protein_coding description:conserved hypothetical protein	6e-158	77.1881	0	0	1.92135	Ascomycota	NA	UniRef90_A0A225AG53 Uncharacterized protein n=1 Tax=Talaromyces atroroseus TaxID=1441469 RepID=A0A225AG53_9EURO	No hit	0	0	1	No hit	0	0	0
AF_DN63327_c0_g1	OKL57680 cds supercontig:ASM190759v1:scaffold_10:807804:809808:1 gene:UA08_07080 gene_biotype:protein_coding transcript_biotype:protein_coding description:ABC transporter ATP-binding protein ARB1	1e-110	89.7436	0	0	1.91235	Ascomycota	NA	UniRef90_A0A1Y1M0H7 Uncharacterized protein (Fragment) n=1 Tax=Photinus pyralis TaxID=7054 RepID=A0A1Y1M0H7_PHOPY	No hit	0	0	1	No hit	0	0	0
AF_DN73488_c0_g1	OKL56765 cds supercontig:ASM190759v1:scaffold_12:703671:705018:1 gene:UA08_07919 gene_biotype:protein_coding transcript_biotype:protein_coding description:putative formate dehydrogenase	3e-137	90.0262	0	0	1.89142	Ascomycota	NA	UniRef90_Q03134 Formate dehydrogenase n=2 Tax=Aspergillus TaxID=5052 RepID=FDH_EMENI	No hit	0	0	1	No hit	0	0	0
AF_DN103131_c0_g1	KFX41826 cds supercontig:ASM75011v1:scf053:60306:64210:1 gene:GQ26_0530240 gene_biotype:protein_coding transcript_biotype:protein_coding description:Uncharacterized protein	4e-160	89.3035	0	0	1.87674	Ascomycota	NA	UniRef90_A0A2H3IWH1 Bestrophin/UPF0187 n=1 Tax=Penicillium occitanis TaxID=290292 RepID=A0A2H3IWH1_9EURO	No hit	0	0	1	No hit	0	gnl|TC-DB|Q5BB29|1.A.46.2.1 Putative uncharacterized protein OS=Emericella nidulans GN=AN2251.2 PE=4 SV=1	71.6418
AF_DN86657_c0_g1	EED24181 cds supercontig:JCVI-TSTA1-3.0:scf_1105507295523:4379950:4381116:-1 gene:TSTA_075530 gene_biotype:protein_coding transcript_biotype:protein_coding description:eukaryotic translation elongation factor 1 subunit Eef1-beta, putative	1e-105	88.9937	0	0	1.87378	Ascomycota	Elongation factor 1-beta	UniRef90_Q0D163 Elongation factor 1-beta n=1 Tax=Aspergillus terreus (strain NIH 2624 / FGSC A1156) TaxID=341663 RepID=Q0D163_ASPTN	No hit	0	0	1	No hit	0	0	0
AF_DN67691_c0_g1	OKL62280 cds supercontig:ASM190759v1:scaffold_2:1010461:1011726:-1 gene:UA08_02491 gene_biotype:protein_coding transcript_biotype:protein_coding description:hypothetical protein	7e-118	88.7931	0	0	1.85622	Ascomycota	NA	UniRef90_B8MAC0 ER-Golgi SNARE complex subunit (Sed5), putative n=7 Tax=Eurotiales TaxID=5042 RepID=B8MAC0_TALSN	No hit	0	0	1	No hit	0	0	0
AF_DN68880_c0_g1	OKL61531 cds supercontig:ASM190759v1:scaffold_3:778795:780235:-1 gene:UA08_03316 gene_biotype:protein_coding transcript_biotype:protein_coding description:hypothetical protein	1e-124	91.5094	0	0	1.85618	Ascomycota	NA	UniRef90_A0A225AJ84 Uncharacterized protein n=1 Tax=Talaromyces atroroseus TaxID=1441469 RepID=A0A225AJ84_9EURO	No hit	0	0	1	No hit	0	0	0
AF_DN89931_c0_g1	KFX44083 cds supercontig:ASM75011v1:scf030:34641:36252:1 gene:GQ26_0300140 gene_biotype:protein_coding transcript_biotype:protein_coding description:Thiamine thiazole synthase	2e-137	90.5149	0	0	1.85193	Ascomycota	NA	No hits	No hit	0	0	1	No hit	0	0	0
AF_DN107930_c0_g1	GAM40203 cds supercontig:TcelY94_1.0:DF933834.1:212633:213538:1 gene:TCE0_038f12364 gene_biotype:protein_coding transcript_biotype:protein_coding description:actin cytoskeleton protein	1e-135	93.7695	0	0	1.85177	Ascomycota	NA	UniRef90_B8MC48 Actin cytoskeleton protein (VIP1), putative n=1 Tax=Talaromyces stipitatus (strain ATCC 10500 / CBS 375.48/ QM 6759 / NRRL 1006) TaxID=441959 RepID=B8MC48_TALSN	No hit	0	0	1	No hit	0	0	0
AF_DN100209_c0_g1	CRG85717 cds supercontig:PIS:WF-38-12_scaffold00002:2535545:2537050:1 gene:PISL3812_02740 gene_biotype:protein_coding transcript_biotype:protein_coding description:ADP,ATP carrier protein	2e-52	78.8462	0	0	1.8484	Asco or Basidio	NA	No hits	No hit	0	0	1	No hit	0	0	0
AF_DN2553_c0_g1	CRG87687 cds supercontig:PIS:WF-38-12_scaffold00003:3258497:3260098:1 gene:PISL3812_04707 gene_biotype:protein_coding transcript_biotype:protein_coding gene_symbol:pepC description:autophagic serine protease Alp2	2e-74	74.7396	0	0	1.84827	Ascomycota	NA	UniRef90_A0A178E6W7 Uncharacterized protein n=1 Tax=Pyrenochaeta sp. DS3sAY3a TaxID=765867 RepID=A0A178E6W7_9PLEO	No hit	0	0	1	No hit	0	0	0
AF_DN84116_c0_g1	OKL64618 cds supercontig:ASM190759v1:scaffold_0:873878:875538:1 gene:UA08_00304 gene_biotype:protein_coding transcript_biotype:protein_coding description:1,3-beta-glucanosyltransferase gel4	4e-179	79.9571	0	0	1.83754	Ascomycota	1,3-beta-glucanosyltransferase	UniRef90_A0A225B4E5 1,3-beta-glucanosyltransferase n=1 Tax=Talaromyces atroroseus TaxID=1441469 RepID=A0A225B4E5_9EURO	No hit	0	0	1	CBM43(152-242)	0	0	0
AF_DN60366_c0_g1	EEA28002 cds supercontig:JCVI-PMFA1-2.0:scf_1105668340764:3503242:3505107:-1 gene:PMAA_028290 gene_biotype:protein_coding transcript_biotype:protein_coding description:conserved hypothetical protein	1e-140	93.0931	0	0	1.82307	Ascomycota	DDHD domain-containing protein	UniRef90_A0A093W3U1 Uncharacterized protein n=2 Tax=Talaromyces marneffei PM1 TaxID=1077442 RepID=A0A093W3U1_TALMA	No hit	0	0	1	No hit	0	0	0
AF_DN103030_c0_g1	EED15202 cds supercontig:JCVI-TSTA1-3.0:scf_1105507295515:1694625:1696007:1 gene:TSTA_046560 gene_biotype:protein_coding transcript_biotype:protein_coding description:RAB GTPase Ypt5,putative	8e-164	82.7094	0	0	1.82132	Ascomycota	Small GTP-binding protein domain-containing protein	UniRef90_A0A0F7TF83 GTP-binding protein ypt5 n=80 Tax=Eurotiomycetes TaxID=147545 RepID=A0A0F7TF83_9EURO	No hit	0	0	1	No hit	0	0	0
AF_DN106779_c0_g1	KFX43463 cds supercontig:ASM75011v1:scf035:151964:154272:-1 gene:GQ26_0350580 gene_biotype:protein_coding transcript_biotype:protein_coding description:hypothetical protein	3e-123	78.3037	0	0	1.81931	Ascomycota	Cell surface protein, putative	UniRef90_A0A2H3IJ22 Uncharacterized protein n=1 Tax=Penicillium occitanis TaxID=290292 RepID=A0A2H3IJ22_9EURO	No hit	0	0	1	No hit	0	0	0
AF_DN93537_c0_g1	KFX45709 cds supercontig:ASM75011v1:scf022:315633:317363:-1 gene:GQ26_0221000 gene_biotype:protein_coding transcript_biotype:protein_coding description:hypothetical protein	0	86.1472	0	0	1.81846	Ascomycota	NA	UniRef90_A0A2H3I0P9 Uncharacterized protein n=1 Tax=Penicillium occitanis TaxID=290292 RepID=A0A2H3I0P9_9EURO	No hit	0	0	1	No hit	0	0	0
AF_DN94644_c0_g1	OKL62417 cds supercontig:ASM190759v1:scaffold_2:1522378:1523932:-1 gene:UA08_02660 gene_biotype:protein_coding transcript_biotype:protein_coding description:putative nucleosome assembly protein	0	86.5385	0	0	1.80958	Ascomycota	Nucleosome assembly protein (NAP)	UniRef90_B8MBX5 Nucleosome assembly protein Nap1, putative n=5 Tax=Eurotiales TaxID=5042 RepID=B8MBX5_TALSN	No hit	0	0	1	No hit	0	0	0
AF_DN66897_c0_g1	EED23070 cds supercontig:JCVI-TSTA1-3.0:scf_1105507295523:1606704:1609425:1 gene:TSTA_065260 gene_biotype:protein_coding transcript_biotype:protein_coding description:phosphoenolpyruvate carboxykinase AcuF	0	89.0598	0	0.0220922	1.80942	Ascomycota	Phosphoenolpyruvate carboxykinase [ATP]	UniRef90_B8LTJ2 Phosphoenolpyruvate carboxykinase AcuF n=4 Tax=Eurotiales TaxID=5042 RepID=B8LTJ2_TALSN	No hit	0	0.0211494	0.999776	No hit	0	0	0
AF_DN1690_c0_g1	OKL60037 cds supercontig:ASM190759v1:scaffold_5:200878:205300:1 gene:UA08_04527 gene_biotype:protein_coding transcript_biotype:protein_coding description:Calcium-transporting ATPase 2	7e-174	86.8519	0	0	1.79703	Ascomycota	NA	UniRef90_A0A225B2F9 Calcium-transporting ATPase n=1 Tax=Talaromyces atroroseus TaxID=1441469 RepID=A0A225B2F9_9EURO	No hit	0	0	1	No hit	0	0	0
AF_DN59506_c0_g1	OKL60392 cds supercontig:ASM190759v1:scaffold_4:434072:435889:-1 gene:UA08_04036 gene_biotype:protein_coding transcript_biotype:protein_coding description:hypothetical protein	0	83.9286	0	0	1.7905	Ascomycota	Transcription factor ATFA	UniRef90_A0A0A0P441 Putative bZIP transcription factor n=4 Tax=Talaromyces marneffei TaxID=37727 RepID=A0A0A0P441_TALMA	No hit	0	0	1	No hit	0	0	0
AF_DN17446_c0_g1	OKL57879 cds supercontig:ASM190759v1:scaffold_9:946940:950411:1 gene:UA08_06709 gene_biotype:protein_coding transcript_biotype:protein_coding description:hypothetical protein	9e-117	87.4644	0	0	1.78863	Ascomycota	NA	UniRef90_A0A225AQJ1 Uncharacterized protein n=1 Tax=Talaromyces atroroseus TaxID=1441469 RepID=A0A225AQJ1_9EURO	No hit	0	0	1	No hit	0	0	0
AF_DN89373_c0_g1	KFX52124 cds supercontig:ASM75011v1:scf003:220520:223025:-1 gene:GQ26_0030820 gene_biotype:protein_coding transcript_biotype:protein_coding description:Zinc finger protein	6e-111	76.1696	0	0	1.78027	Ascomycota	NA	UniRef90_B6QL71 C2H2 transcription factor (Seb1), putative n=4 Tax=Eurotiales TaxID=5042 RepID=B6QL71_TALMQ	No hit	0	0	1	No hit	0	0	0
AF_DN60472_c0_g1	OKL61024 cds supercontig:ASM190759v1:scaffold_3:2181108:2183099:1 gene:UA08_03783 gene_biotype:protein_coding transcript_biotype:protein_coding description:hypothetical protein	6e-90	80.625	0	0.0259132	1.77198	Ascomycota	NA	UniRef90_B8MAM8 EH domain binding protein epsin 2 n=3 Tax=Eurotiales TaxID=5042 RepID=B8MAM8_TALSN	No hit	0	0.0250844	0.999685	No hit	0	0	0
AF_DN58590_c0_g1	KFX42926 cds supercontig:ASM75011v1:scf039:25145:29852:-1 gene:GQ26_0390080 gene_biotype:protein_coding transcript_biotype:protein_coding description:Elongation factor 3	9e-79	77.5544	0	0	1.77169	Ascomycota	NA	UniRef90_A0A0S6X994 Uncharacterized protein n=1 Tax=fungal sp. No.11243 TaxID=1603295 RepID=A0A0S6X994_9FUNG	No hit	0	0	1	No hit	0	0	0
AF_DN85068_c0_g1	OKL56380 cds supercontig:ASM190759v1:scaffold_13:439538:440912:-1 gene:UA08_08193 gene_biotype:protein_coding transcript_biotype:protein_coding description:Sphingolipid long chain base-responsive protein PIL1	4e-156	86.0153	0	0	1.75101	Ascomycota	NA	UniRef90_B8MH01 Cell wall integrity signaling protein Lsp1/Pil1, putative n=6 Tax=Eurotiales TaxID=5042 RepID=B8MH01_TALSN	No hit	0	0	1	No hit	0	0	0
AF_DN82828_c0_g1	OKL60603 cds supercontig:ASM190759v1:scaffold_4:479931:482491:-1 gene:UA08_04050 gene_biotype:protein_coding transcript_biotype:protein_coding description:hypothetical protein	1e-111	83.0022	0	0	1.74897	Ascomycota	NA	UniRef90_A0A1Q5Q8Z9 Uncharacterized protein n=1 Tax=Talaromyces atroroseus TaxID=1441469 RepID=A0A1Q5Q8Z9_9EURO	No hit	0	0	1	No hit	0	0	0
AF_DN73588_c0_g1	OKL61968 cds supercontig:ASM190759v1:scaffold_2:1231024:1235872:1 gene:UA08_02566 gene_biotype:protein_coding transcript_biotype:protein_coding description:hypothetical protein	1e-75	75.3968	0	0	1.74619	Ascomycota	NA	UniRef90_A0A1V6TM33 Uncharacterized protein n=1 Tax=Penicillium steckii TaxID=303698 RepID=A0A1V6TM33_9EURO	No hit	0	0	1	No hit	0	0	0
AF_DN31867_c0_g1	EED15097 cds supercontig:JCVI-TSTA1-3.0:scf_1105507295515:1427338:1429276:1 gene:TSTA_045560 gene_biotype:protein_coding transcript_biotype:protein_coding description:SWIRM domain protein Fun19, putative	1e-171	83.6601	0	0	1.74503	Ascomycota	SWIRM domain-containing protein	UniRef90_B8MIK5 SWIRM domain protein Fun19, putative n=4 Tax=Eurotiales TaxID=5042 RepID=B8MIK5_TALSN	No hit	0	0	1	No hit	0	0	0
AF_DN85668_c0_g1	OKL64618 cds supercontig:ASM190759v1:scaffold_0:873878:875538:1 gene:UA08_00304 gene_biotype:protein_coding transcript_biotype:protein_coding description:1,3-beta-glucanosyltransferase gel4	4e-137	81.5745	0	0	1.74214	Ascomycota	1,3-beta-glucanosyltransferase	UniRef90_A0A225B4E5 1,3-beta-glucanosyltransferase n=1 Tax=Talaromyces atroroseus TaxID=1441469 RepID=A0A225B4E5_9EURO	No hit	0	0	1	GH72(2-199)	0	0	0
AF_DN92171_c0_g1	OKL58883 cds supercontig:ASM190759v1:scaffold_7:8416:12120:1 gene:UA08_05460 gene_biotype:protein_coding transcript_biotype:protein_coding description:hypothetical protein	0	84.6154	0	0	1.73881	Ascomycota	NA	UniRef90_A0A2H3I9V8 Uncharacterized protein n=1 Tax=Penicillium occitanis TaxID=290292 RepID=A0A2H3I9V8_9EURO	No hit	0	0	1	No hit	0	0	0
AF_DN55969_c0_g1	KFX42229 cds supercontig:ASM75011v1:scf047:100124:107601:1 gene:GQ26_0470390 gene_biotype:protein_coding transcript_biotype:protein_coding description:Peroxisomal membrane protein PMP47B	1e-138	79.3578	0.0213481	0	1.73349	Ascomycota	Rna-binding protein fus/tls	UniRef90_A0A2H3IS08 WW/Rsp5/WWP n=1 Tax=Penicillium occitanis TaxID=290292 RepID=A0A2H3IS08_9EURO	No hit	0.0210016	0	0.999779	No hit	0	0	0
AF_DN93005_c0_g1	OKL62829 cds supercontig:ASM190759v1:scaffold_1:1686152:1688019:-1 gene:UA08_01667 gene_biotype:protein_coding transcript_biotype:protein_coding description:Malate synthase, glyoxysomal	5e-119	90.8805	0	0	1.72838	Ascomycota	NA	UniRef90_B8M532 Malate synthase n=6 Tax=Eurotiales TaxID=5042 RepID=B8M532_TALSN	No hit	0	0	1	No hit	0	0	0
AF_DN73361_c0_g1	OKL60092 cds supercontig:ASM190759v1:scaffold_5:116007:117348:-1 gene:UA08_04495 gene_biotype:protein_coding transcript_biotype:protein_coding description:S-adenosylmethionine synthase	0	84.8752	0	0	1.72491	Ascomycota	S-adenosylmethionine synthase	UniRef90_A0A225AFI1 S-adenosylmethionine synthase n=2 Tax=Talaromyces TaxID=5094 RepID=A0A225AFI1_9EURO	No hit	0	0	1	No hit	0	0	0
AF_DN40518_c0_g1	CRG87563 cds supercontig:PIS:WF-38-12_scaffold00003:2854339:2855879:1 gene:PISL3812_04581 gene_biotype:protein_coding transcript_biotype:protein_coding description:glutamine synthetase	2e-150	76.4163	0	0	1.72223	Ascomycota	Glutamine synthetase	UniRef90_R1GU63 Glutamine synthetase n=5 Tax=Botryosphaeriaceae TaxID=45131 RepID=R1GU63_BOTPV	No hit	0	0	1	No hit	0	0	0
AF_DN75435_c0_g1	OKL58845 cds supercontig:ASM190759v1:scaffold_7:420905:422685:-1 gene:UA08_05615 gene_biotype:protein_coding transcript_biotype:protein_coding description:Metacaspase-1A	0	88.1072	0	0	1.68701	Ascomycota	Metacaspase	UniRef90_B0XPP3 Metacaspase-1A n=9 Tax=Aspergillus TaxID=5052 RepID=MCA1A_ASPFC	No hit	0	0	1	No hit	0	0	0
AF_DN94697_c0_g1	OKL58759 cds supercontig:ASM190759v1:scaffold_7:337995:339224:1 gene:UA08_05583 gene_biotype:protein_coding transcript_biotype:protein_coding description:cAMP-dependent protein kinase regulatory subunit	3e-137	84.5528	0	0.028363	1.68387	Ascomycota	cAMP-dependent protein kinase regulatory subunit	UniRef90_B6Q7I9 cAMP-dependent protein kinase regulatory subunit n=3 Tax=Eurotiales TaxID=5042 RepID=B6Q7I9_TALMQ	No hit	0	0.0283178	0.999599	No hit	0	0	0
AF_DN103040_c0_g1	OKL59291 cds supercontig:ASM190759v1:scaffold_6:869008:870556:-1 gene:UA08_05223 gene_biotype:protein_coding transcript_biotype:protein_coding description:Aldehyde dehydrogenase	0	82.4561	0	0	1.67813	Ascomycota	Aldehyde dehydrogenase AldA	UniRef90_A0A225ADN7 Aldehyde dehydrogenase n=1 Tax=Talaromyces atroroseus TaxID=1441469 RepID=A0A225ADN7_9EURO	No hit	0	0	1	No hit	0	0	0
AF_DN95265_c0_g1	OKL64204 cds supercontig:ASM190759v1:scaffold_0:800143:802568:-1 gene:UA08_00275 gene_biotype:protein_coding transcript_biotype:protein_coding description:hypothetical protein	3e-152	89.7619	0	0	1.67643	Ascomycota	NA	UniRef90_A0A225B0H0 Uncharacterized protein n=1 Tax=Talaromyces atroroseus TaxID=1441469 RepID=A0A225B0H0_9EURO	No hit	0	0	1	No hit	0	0	0
AF_DN85233_c0_g1	KFX42338 cds supercontig:ASM75011v1:scf046:152584:154042:-1 gene:GQ26_0460650 gene_biotype:protein_coding transcript_biotype:protein_coding description:Heat shock protein 16	7e-166	78.1609	0	0	1.67487	Ascomycota	Heat shock protein 16	UniRef90_A0A2H3I524 HSP20-like chaperone n=1 Tax=Penicillium occitanis TaxID=290292 RepID=A0A2H3I524_9EURO	ACD	0	0	1	No hit	0	0	0
AF_DN8471_c0_g1	OKL62277 cds supercontig:ASM190759v1:scaffold_2:2172156:2174358:1 gene:UA08_02864 gene_biotype:protein_coding transcript_biotype:protein_coding description:hypothetical protein	0	84.8921	0	0	1.673	Ascomycota	NA	UniRef90_A0A225B8L8 Uncharacterized protein n=1 Tax=Talaromyces atroroseus TaxID=1441469 RepID=A0A225B8L8_9EURO	No hit	0	0	1	No hit	0	0	0
AF_DN65993_c0_g1	GAM33322 cds supercontig:TcelY94_1.0:DF933800.1:15849:19000:1 gene:TCE0_004f00139 gene_biotype:protein_coding transcript_biotype:protein_coding description:hypothetical protein	1e-61	77.7778	0	0	1.67024	Ascomycota	NA	UniRef90_A0A225AD81 Uncharacterized protein n=1 Tax=Talaromyces atroroseus TaxID=1441469 RepID=A0A225AD81_9EURO	No hit	0	0	1	No hit	0	0	0
AF_DN101773_c0_g1	KFX41460 cds supercontig:ASM75011v1:scf059:54621:57662:-1 gene:GQ26_0590250 gene_biotype:protein_coding transcript_biotype:protein_coding description:Arrestin-related trafficking adapter 3	3e-84	75.3846	0	0	1.6649	Ascomycota	NA	UniRef90_A0A225AJT9 Uncharacterized protein n=1 Tax=Talaromyces atroroseus TaxID=1441469 RepID=A0A225AJT9_9EURO	No hit	0	0	1	No hit	0	0	0
AF_DN85662_c0_g1	OKL56721 cds supercontig:ASM190759v1:scaffold_12:1010205:1011164:-1 gene:UA08_08033 gene_biotype:protein_coding transcript_biotype:protein_coding description:hypothetical protein	2e-94	84.0426	0	0	1.65562	Ascomycota	SH3 domain containing protein, variant	UniRef90_A0A225A7Q8 Uncharacterized protein n=1 Tax=Talaromyces atroroseus TaxID=1441469 RepID=A0A225A7Q8_9EURO	No hit	0	0	1	No hit	0	0	0
AF_DN99067_c0_g1	OKL59870 cds supercontig:ASM190759v1:scaffold_5:626273:627769:1 gene:UA08_04677 gene_biotype:protein_coding transcript_biotype:protein_coding description:hypothetical protein	1e-95	85.0877	0	0	1.6453	Ascomycota	NA	UniRef90_A0A225AGP1 Uncharacterized protein n=1 Tax=Talaromyces atroroseus TaxID=1441469 RepID=A0A225AGP1_9EURO	No hit	0	0	1	No hit	0	0	0
AF_DN102757_c0_g1	KFX49052 cds supercontig:ASM75011v1:scf010:270294:272734:1 gene:GQ26_0100960 gene_biotype:protein_coding transcript_biotype:protein_coding description:Initiation-specific alpha-1,6-mannosyltransferase	4e-114	91.3333	0	0	1.6443	Ascomycota	NA	UniRef90_A0A093VGG8 Initiation-specific alpha-1,6-mannosyltransferase n=1 Tax=Talaromyces marneffei PM1 TaxID=1077442 RepID=A0A093VGG8_TALMA	No hit	0	0	1	GT32(38)	0	0	0
AF_DN22597_c0_g1	EED13209 cds supercontig:JCVI-TSTA1-3.0:scf_1105507295487:1363078:1366494:1 gene:TSTA_057050 gene_biotype:protein_coding transcript_biotype:protein_coding description:translation elongation factor EF-2 subunit, putative	1e-65	81.8182	0	0	1.63882	Ascomycota	Eukaryotic elongation factor 2 (Fragment)	UniRef90_A0A072PEY3 Elongation factor 2 n=23 Tax=Herpotrichiellaceae TaxID=43219 RepID=A0A072PEY3_9EURO	No hit	0	0	1	No hit	0	0	0
AF_DN61344_c0_g1	EEA28230 cds supercontig:JCVI-PMFA1-2.0:scf_1105668340764:4121455:4123995:1 gene:PMAA_030470 gene_biotype:protein_coding transcript_biotype:protein_coding description:Hsp70 chaperone BiP/Kar2, putative	9e-63	78.5024	0	0.0309535	1.62632	Ascomycota	Heat shock 70kDa protein 5	UniRef90_F7W676 WGS project CABT00000000 data, contig 2.33 n=1 Tax=Sordaria macrospora (strain ATCC MYA-333 / DSM 997 / K(L3346)/ K-hell) TaxID=771870 RepID=F7W676_SORMK	Hsp70	0	0.0315549	0.999502	No hit	0	gnl|TC-DB|P11021|1.A.33.1.5 78 kDa glucose-regulated protein OS=Homo sapiens GN=HSPA5 PE=1 SV=2	70.2899
AF_DN76378_c0_g1	OKL64476 cds supercontig:ASM190759v1:scaffold_0:853469:854287:1 gene:UA08_00295 gene_biotype:protein_coding transcript_biotype:protein_coding description:hypothetical protein	2e-123	84.7769	0	0	1.62443	Ascomycota	Phosphorylated carbohydrates phosphatase	UniRef90_A0A225BAQ8 Uncharacterized protein n=2 Tax=Talaromyces TaxID=5094 RepID=A0A225BAQ8_9EURO	No hit	0	0	1	No hit	0	0	0
AF_DN4909_c0_g1	OKL60642 cds supercontig:ASM190759v1:scaffold_4:779202:781445:1 gene:UA08_04150 gene_biotype:protein_coding transcript_biotype:protein_coding description:hypothetical protein	0	87.2372	0	0	1.62271	Ascomycota	NA	UniRef90_A0A1Q5Q996 Uncharacterized protein n=1 Tax=Talaromyces atroroseus TaxID=1441469 RepID=A0A1Q5Q996_9EURO	DnaJ	0	0	1	No hit	0	0	0
AF_DN77834_c0_g1	CRG87149 cds supercontig:PIS:WF-38-12_scaffold00003:1610801:1612789:-1 gene:PISL3812_04165 gene_biotype:protein_coding transcript_biotype:protein_coding description:ATP-binding cassette,sub-family F, member 2	1e-81	79.6296	0	0	1.62228	Ascomycota	NA	UniRef90_W2S647 Uncharacterized protein n=2 Tax=Chaetothyriales TaxID=34395 RepID=W2S647_9EURO	No hit	0	0	1	No hit	0	gnl|TC-DB|Q9FJH6|3.A.1.121.10 ABC transporter F family member 1 OS=Arabidopsis thaliana OX=3702 GN=ABCF1 PE=2 SV=1	80.5556
AF_DN83957_c0_g1	OKL63553 cds supercontig:ASM190759v1:scaffold_1:588202:589230:1 gene:UA08_01291 gene_biotype:protein_coding transcript_biotype:protein_coding description:Transcription initiation factor IIB	3e-162	87.4214	0	0	1.61762	Ascomycota	Transcription initiation protein (Fragment)	UniRef90_B8M4I4 Transcription initiation protein n=2 Tax=Talaromyces TaxID=5094 RepID=B8M4I4_TALSN	No hit	0	0	1	No hit	0	0	0
AF_DN83702_c0_g1	OKL61968 cds supercontig:ASM190759v1:scaffold_2:1231024:1235872:1 gene:UA08_02566 gene_biotype:protein_coding transcript_biotype:protein_coding description:hypothetical protein	4e-151	87.2611	0	0	1.61461	Ascomycota	NA	UniRef90_A0A0U1M6X7 Eukaryotic translation initiation factor 4 gamma n=1 Tax=Talaromyces islandicus TaxID=28573 RepID=A0A0U1M6X7_TALIS	No hit	0	0	1	No hit	0	0	0
AF_DN95457_c0_g1	KFX48527 cds supercontig:ASM75011v1:scf012:634852:636310:1 gene:GQ26_0122250 gene_biotype:protein_coding transcript_biotype:protein_coding description:3-ketoacyl-CoA thiolase, peroxisomal	2e-103	83.9895	0	0	1.61252	Ascomycota	NA	UniRef90_A0A225AW39 3-ketoacyl-CoA thiolase, peroxisomal n=1 Tax=Talaromyces atroroseus TaxID=1441469 RepID=A0A225AW39_9EURO	No hit	0	0	1	No hit	0	0	0
AF_DN77619_c0_g1	KFX48718 cds supercontig:ASM75011v1:scf011:326203:330442:1 gene:GQ26_0111070 gene_biotype:protein_coding transcript_biotype:protein_coding description:Protein bli-3	2e-79	76.5101	0	0	1.61097	Ascomycota	Blue light-inducible protein Bli-3	UniRef90_B6QBC1 Blue light-inducible protein Bli-3 n=2 Tax=Eurotiales TaxID=5042 RepID=B6QBC1_TALMQ	No hit	0	0	1	No hit	0	0	0
AF_DN20525_c0_g1	OKL64346 cds supercontig:ASM190759v1:scaffold_0:1942409:1943644:-1 gene:UA08_00686 gene_biotype:protein_coding transcript_biotype:protein_coding description:hypothetical protein	2e-135	82.963	0	0	1.60733	Ascomycota	NA	UniRef90_A0A225BAD8 Uncharacterized protein n=1 Tax=Talaromyces atroroseus TaxID=1441469 RepID=A0A225BAD8_9EURO	No hit	0	0	1	No hit	0	0	0
AF_DN3523_c0_g1	KFX47268 cds supercontig:ASM75011v1:scf015:42782:45519:1 gene:GQ26_0150170 gene_biotype:protein_coding transcript_biotype:protein_coding description:Negative regulator of sexual conjugation and meiosis	5e-134	91.7355	0	0	1.5913	Ascomycota	NA	UniRef90_A0A2H3IJ68 Uncharacterized protein n=1 Tax=Penicillium occitanis TaxID=290292 RepID=A0A2H3IJ68_9EURO	No hit	0	0	1	No hit	0	0	0
AF_DN64607_c0_g1	KFX49241 cds supercontig:ASM75011v1:scf010:676120:678728:-1 gene:GQ26_0102360 gene_biotype:protein_coding transcript_biotype:protein_coding description:Kelch-like protein 38	5e-139	93.1548	0	0	1.59118	Ascomycota	NA	UniRef90_A0A093XVF7 Kelch-like protein 38 n=4 Tax=Eurotiales TaxID=5042 RepID=A0A093XVF7_TALMA	No hit	0	0	1	No hit	0	0	0
AF_DN72827_c0_g1	KFX46188 cds supercontig:ASM75011v1:scf020:397429:400626:1 gene:GQ26_0201420 gene_biotype:protein_coding transcript_biotype:protein_coding description:G1/S-specific cyclin pas1	1e-104	78.1046	0	0	1.58169	Ascomycota	NA	UniRef90_A0A2H3IUL0 Uncharacterized protein n=1 Tax=Penicillium occitanis TaxID=290292 RepID=A0A2H3IUL0_9EURO	No hit	0	0	1	No hit	0	0	0
AF_DN84248_c0_g1	OKL63643 cds supercontig:ASM190759v1:scaffold_0:1419794:1422222:1 gene:UA08_00502 gene_biotype:protein_coding transcript_biotype:protein_coding description:Vacuolar protein sorting-associated protein 1	0	88.0471	0	0	1.57212	Ascomycota	NA	UniRef90_B8MBF5 Vacuolar dynamin-like GTPase VpsA, putative n=4 Tax=Eurotiales TaxID=5042 RepID=B8MBF5_TALSN	No hit	0	0	1	No hit	0	0	0
AF_DN4285_c0_g1	OKL63540 cds supercontig:ASM190759v1:scaffold_1:372449:374127:1 gene:UA08_01209 gene_biotype:protein_coding transcript_biotype:protein_coding description:putative UTP--glucose-1-phosphate uridylyltransferase	0	90.5051	0	0	1.57012	Ascomycota	NA	UniRef90_B6Q7U6 UTP--glucose-1-phosphate uridylyltransferase n=8 Tax=Eurotiales TaxID=5042 RepID=B6Q7U6_TALMQ	No hit	0	0	1	No hit	0	0	0
AF_DN88967_c0_g1	OKL64011 cds supercontig:ASM190759v1:scaffold_0:2322524:2323408:1 gene:UA08_00820 gene_biotype:protein_coding transcript_biotype:protein_coding description:hypothetical protein	3e-173	85.8255	0	0	1.56069	Ascomycota	PR domain zinc finger protein 16	UniRef90_A0A225AQW8 Uncharacterized protein n=1 Tax=Talaromyces atroroseus TaxID=1441469 RepID=A0A225AQW8_9EURO	No hit	0	0	1	No hit	0	0	0
AF_DN20435_c0_g1	OKL62786 cds supercontig:ASM190759v1:scaffold_1:1302731:1304769:-1 gene:UA08_01524 gene_biotype:protein_coding transcript_biotype:protein_coding description:hypothetical protein	4e-121	86.2069	0	0	1.55336	Ascomycota	NA	UniRef90_B8M6J3 Uncharacterized protein n=4 Tax=Eurotiales TaxID=5042 RepID=B8M6J3_TALSN	No hit	0	0	1	No hit	0	0	0
AF_DN93368_c0_g1	EED16186 cds supercontig:JCVI-TSTA1-3.0:scf_1105507295549:1191701:1196238:1 gene:TSTA_012930 gene_biotype:protein_coding transcript_biotype:protein_coding description:LEA domain protein	0	88.6792	0	0	1.53435	Ascomycota	NA	UniRef90_A0A2H3IVL6 Uncharacterized protein n=1 Tax=Penicillium occitanis TaxID=290292 RepID=A0A2H3IVL6_9EURO	No hit	0	0	1	No hit	0	0	0
AF_DN60178_c0_g1	OKL63799 cds supercontig:ASM190759v1:scaffold_0:2127827:2129663:-1 gene:UA08_00752 gene_biotype:protein_coding transcript_biotype:protein_coding description:hypothetical protein	8e-82	84.2767	0	0	1.53384	Ascomycota	NA	UniRef90_A0A225B6P2 Uncharacterized protein n=1 Tax=Talaromyces atroroseus TaxID=1441469 RepID=A0A225B6P2_9EURO	No hit	0	0	1	No hit	0	0	0
AF_DN66028_c0_g1	OKL60143 cds supercontig:ASM190759v1:scaffold_5:291495:293870:1 gene:UA08_04557 gene_biotype:protein_coding transcript_biotype:protein_coding description:Heat shock protein 78, mitochondrial	0	84.9084	0	0	1.53194	Ascomycota	Heat shock protein 78, mitochondrial	UniRef90_B8LVQ2 Heat shock protein/chaperonin HSP78, putative n=5 Tax=Eurotiales TaxID=5042 RepID=B8LVQ2_TALSN	Hsp100	0	0	1	No hit	0	0	0
AF_DN74901_c0_g1	OKL58935 cds supercontig:ASM190759v1:scaffold_7:21849:25724:-1 gene:UA08_05466 gene_biotype:protein_coding transcript_biotype:protein_coding description:Pre-mRNA-processing ATP-dependent RNA helicase prp5	0	88.1326	0	0	1.53109	Ascomycota	NA	UniRef90_A0A225AWW1 Pre-mRNA-processing ATP-dependent RNA helicase prp5 n=1 Tax=Talaromyces atroroseus TaxID=1441469 RepID=A0A225AWW1_9EURO	No hit	0	0	1	No hit	0	0	0
AF_DN73176_c0_g1	EED19668 cds supercontig:JCVI-TSTA1-3.0:scf_1105507295541:1672706:1674686:1 gene:TSTA_029440 gene_biotype:protein_coding transcript_biotype:protein_coding description:tRNA splicing protein (Spl1), putative	2e-72	81.6514	0	0	1.53097	Ascomycota	NA	UniRef90_X0B2Q0 Cysteine desulfurase n=9 Tax=Fusarium oxysporum TaxID=5507 RepID=X0B2Q0_FUSOX	No hit	0	0	1	No hit	0	0	0
AF_DN94215_c0_g1	OKL59281 cds supercontig:ASM190759v1:scaffold_6:1439435:1441076:1 gene:UA08_05411 gene_biotype:protein_coding transcript_biotype:protein_coding description:hypothetical protein	1e-168	75.657	0	0	1.50416	Ascomycota	NA	UniRef90_A0A225ADM8 Uncharacterized protein n=1 Tax=Talaromyces atroroseus TaxID=1441469 RepID=A0A225ADM8_9EURO	No hit	0	0	1	No hit	0	0	0
AF_DN55845_c0_g1	OKL63378 cds supercontig:ASM190759v1:scaffold_1:1748146:1749908:1 gene:UA08_01690 gene_biotype:protein_coding transcript_biotype:protein_coding description:Cysteine desulfurase, mitochondrial	5e-114	90.3846	0	0	1.49725	Ascomycota	NA	No hits	No hit	0	0	1	No hit	0	0	0
AF_DN56711_c0_g1	OKL63186 cds supercontig:ASM190759v1:scaffold_1:2312365:2316402:-1 gene:UA08_01887 gene_biotype:protein_coding transcript_biotype:protein_coding description:hypothetical protein	1e-161	83.252	0	0	1.48361	Ascomycota	NA	UniRef90_A0A1Q5QB90 Uncharacterized protein n=1 Tax=Talaromyces atroroseus TaxID=1441469 RepID=A0A1Q5QB90_9EURO	No hit	0	0	1	No hit	0	0	0
AF_DN67195_c0_g1	OKL61185 cds supercontig:ASM190759v1:scaffold_3:1669313:1670581:-1 gene:UA08_03602 gene_biotype:protein_coding transcript_biotype:protein_coding description:hypothetical protein	2e-158	87.013	0	0.0252421	1.4757	Ascomycota	Eukaryotic translation initiation factor 5	UniRef90_A0A225B2Y5 Uncharacterized protein n=1 Tax=Talaromyces atroroseus TaxID=1441469 RepID=A0A225B2Y5_9EURO	No hit	0	0.0274889	0.999622	No hit	0	0	0
AF_DN64412_c0_g1	OKL61587 cds supercontig:ASM190759v1:scaffold_3:2186399:2187337:-1 gene:UA08_03785 gene_biotype:protein_coding transcript_biotype:protein_coding description:hypothetical protein	2e-143	86.6228	0	0	1.46776	Ascomycota	NA	UniRef90_A0A225B6Q2 Uncharacterized protein n=1 Tax=Talaromyces atroroseus TaxID=1441469 RepID=A0A225B6Q2_9EURO	No hit	0	0	1	No hit	0	0	0
AF_DN106748_c0_g1	OKL58786 cds supercontig:ASM190759v1:scaffold_7:534948:536492:-1 gene:UA08_05655 gene_biotype:protein_coding transcript_biotype:protein_coding description:hypothetical protein	8e-164	85.8473	0	0	1.44464	Ascomycota	Putative only prolin and serin are matching in the corresponding protein	UniRef90_A0A225AUY2 Uncharacterized protein n=1 Tax=Talaromyces atroroseus TaxID=1441469 RepID=A0A225AUY2_9EURO	No hit	0	0	1	No hit	0	0	0
AF_DN108714_c0_g1	KFX44926 cds supercontig:ASM75011v1:scf025:96244:100380:1 gene:GQ26_0250360 gene_biotype:protein_coding transcript_biotype:protein_coding description:Transketolase	2e-97	86.2385	0	0	1.4314	Ascomycota	NA	UniRef90_A0A0U1M3J2 Transketolase n=1 Tax=Talaromyces islandicus TaxID=28573 RepID=A0A0U1M3J2_TALIS	No hit	0	0	1	No hit	0	0	0
AF_DN65046_c0_g1	OKL61698 cds supercontig:ASM190759v1:scaffold_2:147362:149052:-1 gene:UA08_02178 gene_biotype:protein_coding transcript_biotype:protein_coding description:hypothetical protein	1e-127	78.5965	0	0.0202207	1.42781	Ascomycota	Carboxymethylenebutenolidase	UniRef90_A0A2H3IMS2 Uncharacterized protein n=2 Tax=Eurotiales TaxID=5042 RepID=A0A2H3IMS2_9EURO	No hit	0	0.0225638	0.999745	No hit	0	0	0
AF_DN109355_c0_g1	KFX43287 cds supercontig:ASM75011v1:scf036:35551:39516:-1 gene:GQ26_0360180 gene_biotype:protein_coding transcript_biotype:protein_coding description:putative 5-methyltetrahydropteroyltriglutamate--homocysteine methyltransferase	2e-53	77.673	0	0	1.42436	Ascomycota	NA	UniRef90_A0A0L1HC73 5-methyltetrahydropteroyltriglutamate-homocysteine methyltransferase n=15 Tax=Eukaryota TaxID=2759 RepID=A0A0L1HC73_9PLEO	No hit	0	0	1	No hit	0	0	0
AF_DN102231_c0_g1	OKL64653 cds supercontig:ASM190759v1:scaffold_0:2254842:2256075:1 gene:UA08_00796 gene_biotype:protein_coding transcript_biotype:protein_coding description:60S ribosomal protein L5	2e-148	90.7407	0	0	1.40335	Ascomycota	Large subunit ribosomal protein L5e	UniRef90_B8M2C6 60S ribosomal protein L5, putative n=4 Tax=Talaromyces TaxID=5094 RepID=B8M2C6_TALSN	No hit	0	0	1	No hit	0	0	0
AF_DN71235_c0_g1	OKL64663 cds supercontig:ASM190759v1:scaffold_0:1542307:1543316:-1 gene:UA08_00549 gene_biotype:protein_coding transcript_biotype:protein_coding description:hypothetical protein	2e-122	88.7955	0	0	1.39965	Ascomycota	NA	UniRef90_A0A225AYE3 Uncharacterized protein n=1 Tax=Talaromyces atroroseus TaxID=1441469 RepID=A0A225AYE3_9EURO	No hit	0	0	1	No hit	0	0	0
AF_DN76734_c0_g1	OKL63143 cds supercontig:ASM190759v1:scaffold_1:765467:766136:-1 gene:UA08_01354 gene_biotype:protein_coding transcript_biotype:protein_coding description:60S ribosomal protein L14-B	0	77.9048	0	0	1.38404	Ascomycota	Large subunit ribosomal protein L14e	UniRef90_A0A2H3IB88 Ribosomal protein L14 n=1 Tax=Penicillium occitanis TaxID=290292 RepID=A0A2H3IB88_9EURO	No hit	0	0	1	No hit	0	0	0
AF_DN105577_c0_g1	EEA24041 cds supercontig:JCVI-PMFA1-2.0:scf_1105668340960:1061962:1063439:1 gene:PMAA_080590 gene_biotype:protein_coding transcript_biotype:protein_coding description:aspartic endopeptidase(AP1), putative	1e-120	87.5339	0	0	1.34777	Ascomycota	NA	UniRef90_A0A2H3J9S0 Peptidase aspartic, catalytic n=1 Tax=Penicillium occitanis TaxID=290292 RepID=A0A2H3J9S0_9EURO	No hit	0	0	1	No hit	0	0	0
AF_DN64355_c0_g1	OKL61493 cds supercontig:ASM190759v1:scaffold_3:851274:851944:1 gene:UA08_03337 gene_biotype:protein_coding transcript_biotype:protein_coding description:hypothetical protein	3e-74	74.7368	0	0	1.34291	Ascomycota	NA	UniRef90_A0A225APS1 Uncharacterized protein n=1 Tax=Talaromyces atroroseus TaxID=1441469 RepID=A0A225APS1_9EURO	No hit	0	0	1	No hit	0	0	0
AF_DN102866_c0_g1	OKL63659 cds supercontig:ASM190759v1:scaffold_0:1088258:1090756:-1 gene:UA08_00388 gene_biotype:protein_coding transcript_biotype:protein_coding description:DNA repair helicase RAD25	2e-117	88.5057	0	0	1.3412	Ascomycota	NA	UniRef90_E9CSI3 TFIIH complex helicase Ssl2 n=1 Tax=Coccidioides posadasii (strain RMSCC 757 / Silveira) TaxID=443226 RepID=E9CSI3_COCPS	No hit	0	0	1	No hit	0	0	0
AF_DN95709_c0_g1	EEA21944 cds supercontig:JCVI-PMFA1-2.0:scf_1105668340984:1978687:1981402:1 gene:PMAA_057320 gene_biotype:protein_coding transcript_biotype:protein_coding description:TBC domain protein,putative	9e-119	79.5238	0	0.016307	1.33953	Ascomycota	NA	UniRef90_A0A225AEF7 Uncharacterized protein n=1 Tax=Talaromyces atroroseus TaxID=1441469 RepID=A0A225AEF7_9EURO	No hit	0	0.0190276	0.999819	No hit	0	0	0
AF_DN86400_c0_g1	OKL61968 cds supercontig:ASM190759v1:scaffold_2:1231024:1235872:1 gene:UA08_02566 gene_biotype:protein_coding transcript_biotype:protein_coding description:hypothetical protein	2e-97	76.9006	0	0	1.32064	Ascomycota	NA	UniRef90_A0A225AXA8 Uncharacterized protein n=1 Tax=Talaromyces atroroseus TaxID=1441469 RepID=A0A225AXA8_9EURO	No hit	0	0	1	No hit	0	0	0
AF_DN108133_c0_g1	OKL59308 cds supercontig:ASM190759v1:scaffold_6:1303219:1306839:1 gene:UA08_05372 gene_biotype:protein_coding transcript_biotype:protein_coding description:hypothetical protein	4e-111	83.7037	0	0	1.31785	Ascomycota	NA	UniRef90_A0A225APW9 Uncharacterized protein n=1 Tax=Talaromyces atroroseus TaxID=1441469 RepID=A0A225APW9_9EURO	No hit	0	0	1	No hit	0	0	0
AF_DN77046_c0_g1	OKL59968 cds supercontig:ASM190759v1:scaffold_5:448051:449837:1 gene:UA08_04614 gene_biotype:protein_coding transcript_biotype:protein_coding description:hypothetical protein	3e-72	74.7222	0	0	1.31155	Ascomycota	NA	UniRef90_B8LWJ0 Conserved lysine-rich protein, putative n=1 Tax=Talaromyces stipitatus (strain ATCC 10500 / CBS 375.48 /QM 6759 / NRRL 1006) TaxID=441959 RepID=B8LWJ0_TALSN	No hit	0	0	1	No hit	0	0	0
AF_DN100049_c0_g1	OKL64240 cds supercontig:ASM190759v1:scaffold_0:711473:712551:-1 gene:UA08_00251 gene_biotype:protein_coding transcript_biotype:protein_coding description:Cytosolic Fe-S cluster assembly factor nbp35	5e-89	81.8482	0	0	1.30459	Ascomycota	NA	UniRef90_B8MBN4 Cytosolic Fe-S cluster assembly factor NBP35 n=5 Tax=Eurotiales TaxID=5042 RepID=B8MBN4_TALSN	No hit	0	0	1	No hit	0	0	0
AF_DN23809_c0_g1	OKL60750 cds supercontig:ASM190759v1:scaffold_4:1435613:1437740:-1 gene:UA08_04383 gene_biotype:protein_coding transcript_biotype:protein_coding description:Fimbrin	6e-134	88.3721	0	0	1.29361	Ascomycota	NA	UniRef90_B8M0Y6 Actin-bundling protein Sac6, putative n=6 Tax=Eurotiales TaxID=5042 RepID=B8M0Y6_TALSN	No hit	0	0	1	No hit	0	0	0
AF_DN104590_c0_g1	OKL61702 cds supercontig:ASM190759v1:scaffold_2:139603:140814:1 gene:UA08_02174 gene_biotype:protein_coding transcript_biotype:protein_coding description:Pre-mRNA-splicing factor slt11	3e-178	83.1858	0	0.0369592	1.27751	Ascomycota	Nucleotide-binding, alpha-beta plait	UniRef90_A0A225AJM2 Pre-mRNA-splicing factor slt11 n=1 Tax=Talaromyces atroroseus TaxID=1441469 RepID=A0A225AJM2_9EURO	No hit	0	0.0440507	0.999029	No hit	0	0	0
AF_DN85528_c0_g1	KFX51890 cds supercontig:ASM75011v1:scf004:692843:698073:1 gene:GQ26_0042530 gene_biotype:protein_coding transcript_biotype:protein_coding description:Eukaryotic translation initiation factor 4 gamma	4e-55	77.3333	0	0	1.23481	Ascomycota	NA	UniRef90_A0A225AXA8 Uncharacterized protein n=1 Tax=Talaromyces atroroseus TaxID=1441469 RepID=A0A225AXA8_9EURO	No hit	0	0	1	No hit	0	0	0
AF_DN55534_c0_g1	OKL56353 cds supercontig:ASM190759v1:scaffold_14:507811:509626:-1 gene:UA08_08531 gene_biotype:protein_coding transcript_biotype:protein_coding description:hypothetical protein	6e-146	77.9736	0	0	1.18246	Ascomycota	NA	UniRef90_A0A1Q5Q821 Uncharacterized protein n=1 Tax=Talaromyces atroroseus TaxID=1441469 RepID=A0A1Q5Q821_9EURO	No hit	0	0	1	No hit	0	0	0
AF_DN79373_c0_g1	OKL61968 cds supercontig:ASM190759v1:scaffold_2:1231024:1235872:1 gene:UA08_02566 gene_biotype:protein_coding transcript_biotype:protein_coding description:hypothetical protein	4e-105	86.3768	0	0	1.14007	Ascomycota	NA	UniRef90_A0A232LXT1 Uncharacterized protein n=1 Tax=Elaphomyces granulatus TaxID=519963 RepID=A0A232LXT1_9EURO	No hit	0	0	1	No hit	0	0	0
AF_DN66356_c0_g1	OKL61298 cds supercontig:ASM190759v1:scaffold_3:499106:501172:-1 gene:UA08_03216 gene_biotype:protein_coding transcript_biotype:protein_coding description:hypothetical protein	4e-117	81.6425	0	0	1.03314	Ascomycota	NA	UniRef90_A0A225AVH5 Uncharacterized protein n=1 Tax=Talaromyces atroroseus TaxID=1441469 RepID=A0A225AVH5_9EURO	No hit	0	0	1	No hit	0	0	0
AF_DN87177_c0_g1	CRG90321 cds supercontig:PIS:WF-38-12_scaffold00007:1767385:1770050:1 gene:PISL3812_07364 gene_biotype:protein_coding transcript_biotype:protein_coding description:putative protein PB7E8,02	1e-64	79.8246	0	0	0.999276	Ascomycota	NA	UniRef90_A0A225AX42 Uncharacterized protein n=1 Tax=Talaromyces atroroseus TaxID=1441469 RepID=A0A225AX42_9EURO	No hit	0	0	1	No hit	0	0	0
AF_DN87294_c0_g1	OKL58333 cds supercontig:ASM190759v1:scaffold_9:679764:682606:-1 gene:UA08_06625 gene_biotype:protein_coding transcript_biotype:protein_coding description:Cell division control protein 48	1e-55	76.5625	0	0	0.947994	Asco or Basidio	p-loop containing nucleoside triphosphate hydrolase protein	UniRef90_E3KRP0 Cell division cycle protein 48 n=6 Tax=Pucciniales TaxID=5258 RepID=E3KRP0_PUCGT	Hsp100	0	0	1	No hit	0	gnl|TC-DB|P55072|3.A.16.1.1 Transitional endoplasmic reticulum ATPase (TER ATPase) (15S Mg(2+)- ATPase p97 subunit) (Valosin-containing protein) (VCP) - Homo sapiens (Human).	92.9688
AF_DN77219_c0_g1	OKL61035 cds supercontig:ASM190759v1:scaffold_3:682334:685942:1 gene:UA08_03285 gene_biotype:protein_coding transcript_biotype:protein_coding description:hypothetical protein	2e-88	81.0256	0	0	0.6461	Ascomycota	NA	UniRef90_B8M193 Importin beta-4 subunit, putative n=5 Tax=Eurotiales TaxID=5042 RepID=B8M193_TALSN	No hit	0	0	1	No hit	0	0	0

## Sheet: A. sisalana
ID	Blastn hit (against all Talaromyces genomes)	E-value	Identity (%)	Leaf mean expression (TPM)	Stem mean expression (TPM)	Root mean expression (TPM)	Classification	Pannzer Annotation	Blast Uniref90 annotation	HSP db classification	Leaf SPM	Stem SPM	Root SPM	CAZy	SignalP	TCDB hit description	TCDB Alignment cov (%)
AS_DN35302_c0_g1	EEA20832 cds supercontig:JCVI-PMFA1-2.0:scf_1105668340738:2110747:2112538:1 gene:PMAA_046520 gene_biotype:protein_coding transcript_biotype:protein_coding description:heat shock protein,putative	0	77.8986	0.00957377	0.0132052	148.137	Ascomycota	Heat shock protein Hsp20	UniRef90_A0A2H3IPC9 Complex 1 LYR protein n=1 Tax=Penicillium occitanis TaxID=290292 RepID=A0A2H3IPC9_9EURO	ACD	0.00190378	0.00262119	0.999995	No hit	0	0	0
AS_DN57516_c1_g1	KFX50753 cds supercontig:ASM75011v1:scf006:171384:173946:-1 gene:GQ26_0060610 gene_biotype:protein_coding transcript_biotype:protein_coding description:Elongation factor 1-alpha	0	87.8505	28.5885	42.9965	133.608	Ascomycota	Translation elongation factor 1 alpha subunit (Fragment)	UniRef90_A0A163GAQ2 Elongation factor 1-alpha n=1 Tax=Didymella rabiei TaxID=5454 RepID=A0A163GAQ2_DIDRA	No hit	0.479879	0.536082	0.694501	No hit	0	0	0
AS_DN73916_c0_g1	EEA26757 cds supercontig:JCVI-PMFA1-2.0:scf_1105668340764:395483:397282:-1 gene:PMAA_016760 gene_biotype:protein_coding transcript_biotype:protein_coding description:heat shock protein,putative	1e-159	72.9167	0.0136726	0	113.236	Ascomycota	Heat shock protein 30	UniRef90_A0A2H3ICD9 HSP20-like chaperone n=1 Tax=Penicillium occitanis TaxID=290292 RepID=A0A2H3ICD9_9EURO	ACD	0.002866	0	0.999996	No hit	0	0	0
AS_DN53864_c3_g1	KFX42404 cds supercontig:ASM75011v1:scf045:151797:154170:-1 gene:GQ26_0450520 gene_biotype:protein_coding transcript_biotype:protein_coding description:Heat shock protein 90	0	83.3992	2.90302	2.67371	99.5239	Ascomycota	NA	UniRef90_A0A0J0XBS3 Heat-shock protein 90 n=1 Tax=Cutaneotrichosporon oleaginosum TaxID=879819 RepID=A0A0J0XBS3_9TREE	Hsp90	0.273428	0.261271	0.925729	No hit	0	gnl|TC-DB|P08238|8.A.163.1.1 Heat shock protein HSP 90-beta OS=Homo sapiens OX=9606 GN=HSP90AB1 PE=1 SV=4	76.2846
AS_DN59592_c8_g2	KFX47104 cds supercontig:ASM75011v1:scf016:391874:394521:-1 gene:GQ26_0161420 gene_biotype:protein_coding transcript_biotype:protein_coding description:Heat shock 70 kDa protein	0	92.053	0.132911	0	99.4984	Ascomycota	Heat shock protein 70 (Fragment)	UniRef90_V5FHU7 Molecular chaperone Hsp70 n=2 Tax=Eurotiales TaxID=5042 RepID=V5FHU7_BYSSN	Hsp70	0.0270589	0	0.999634	No hit	0	gnl|TC-DB|P10591|3.A.16.1.6 Heat shock protein SSA1 OS=Saccharomyces cerevisiae (strain ATCC 204508 / S288c) OX=559292 GN=SSA1 PE=1 SV=4	94.0397
AS_DN51359_c2_g1	KFX47104 cds supercontig:ASM75011v1:scf016:391874:394521:-1 gene:GQ26_0161420 gene_biotype:protein_coding transcript_biotype:protein_coding description:Heat shock 70 kDa protein	0	89.4515	37.0815	61.562	71.3344	Ascomycota	Heat shock 70 kDa protein (Fragment)	UniRef90_A0A139I2Z2 Uncharacterized protein n=2 Tax=leotiomyceta TaxID=716546 RepID=A0A139I2Z2_9PEZI	Hsp70	0.521641	0.592788	0.61359	No hit	0	gnl|TC-DB|P10591|3.A.16.1.6 Heat shock protein SSA1 OS=Saccharomyces cerevisiae (strain ATCC 204508 / S288c) OX=559292 GN=SSA1 PE=1 SV=4	94.3038
AS_DN53419_c0_g2	OKL59070 cds supercontig:ASM190759v1:scaffold_7:1185243:1187269:-1 gene:UA08_05850 gene_biotype:protein_coding transcript_biotype:protein_coding description:Heat shock protein	1e-130	89.4309	0.284117	0.162864	67.3109	Ascomycota	Heat shock 70 kDa protein (Fragment)	UniRef90_V5FHU7 Molecular chaperone Hsp70 n=2 Tax=Eurotiales TaxID=5042 RepID=V5FHU7_BYSSN	Hsp70	0.0590605	0.0356354	0.997618	No hit	0	gnl|TC-DB|P22953|1.A.33.1.1 HEAT SHOCK COGNATE 70 KDA PROTEIN 1 (HSC70.1) - Arabidopsis thaliana (Mouse-ear cress).	80.4878
AS_DN43419_c1_g1	KFX46713 cds supercontig:ASM75011v1:scf017:28661:29178:-1 gene:GQ26_0170120 gene_biotype:protein_coding transcript_biotype:protein_coding description:12 kDa heat shock protein	9e-92	82.2034	0	0	66.8211	Ascomycota	Chaperone/heat shock protein Hsp12	UniRef90_A0A2H3IMJ7 Heat shock protein 9/12 n=1 Tax=Penicillium occitanis TaxID=290292 RepID=A0A2H3IMJ7_9EURO	No hit	0	0	1	No hit	0	0	0
AS_DN53419_c0_g3	EEA28230 cds supercontig:JCVI-PMFA1-2.0:scf_1105668340764:4121455:4123995:1 gene:PMAA_030470 gene_biotype:protein_coding transcript_biotype:protein_coding description:Hsp70 chaperone BiP/Kar2, putative	0	90.1173	7.77067	19.3182	56.72	Ascomycota	Heat shock 70kDa protein 5	UniRef90_A0A0J8RFI9 Heat shock 70 kDa protein C n=1 Tax=Coccidioides immitis H538.4 TaxID=396776 RepID=A0A0J8RFI9_COCIT	Hsp70	0.394919	0.54771	0.737599	No hit	0	gnl|TC-DB|P08107|1.A.33.1.3 Heat shock 70 kDa protein 1 (HSP70.1) (HSP70-1/HSP70-2) - Homo sapiens (Human).	70.3518
AS_DN50667_c0_g1	CRG85717 cds supercontig:PIS:WF-38-12_scaffold00002:2535545:2537050:1 gene:PISL3812_02740 gene_biotype:protein_coding transcript_biotype:protein_coding description:ADP,ATP carrier protein	3e-157	86.4706	0.0579415	0.0356122	47.8654	Ascomycota	ADP/ATP carrier protein (Fragment)	UniRef90_A0A0F7TGZ0 Putative ADP,ATP carrier protein n=12 Tax=Aspergillaceae TaxID=1131492 RepID=A0A0F7TGZ0_9EURO	No hit	0.0144808	0.00899641	0.999855	No hit	0	gnl|TC-DB|P18239|2.A.29.1.7 ADP,ATP carrier protein 2 - Saccharomyces cerevisiae (Baker's yeast).	90.5882
AS_DN54411_c1_g1	CRG85717 cds supercontig:PIS:WF-38-12_scaffold00002:2535545:2537050:1 gene:PISL3812_02740 gene_biotype:protein_coding transcript_biotype:protein_coding description:ADP,ATP carrier protein	0	85.2544	0.0307294	0.0875304	28.9758	Ascomycota	Mitochondrial carrier	UniRef90_A0A0D1YZR9 ADP,ATP carrier protein n=6 Tax=Fungi TaxID=4751 RepID=A0A0D1YZR9_9PEZI	No hit	0.00889788	0.0246679	0.999656	No hit	0	gnl|TC-DB|P18239|2.A.29.1.7 ADP,ATP carrier protein 2 - Saccharomyces cerevisiae (Baker's yeast).	83.4891
AS_DN46685_c0_g1	OKL60345 cds supercontig:ASM190759v1:scaffold_4:693439:695387:-1 gene:UA08_04120 gene_biotype:protein_coding transcript_biotype:protein_coding description:Elongation factor 1-alpha	2e-139	84.058	0.0788489	0.156447	26.8887	Ascomycota	Translation elongation factor 1-alpha (Fragment)	UniRef90_D5JGM2 Translation elongation factor 1-alpha (Fragment) n=39 Tax=leotiomyceta TaxID=716546 RepID=D5JGM2_9PLEO	No hit	0.0227757	0.0436198	0.998789	No hit	0	0	0
AS_DN34827_c0_g1	CRG86655 cds supercontig:PIS:WF-38-12_scaffold00002:5405973:5408163:-1 gene:PISL3812_03665 gene_biotype:protein_coding transcript_biotype:protein_coding gene_symbol:sspB description:Heat shock protein 90	0	90.4192	0.0293892	0	24.3304	Ascomycota	NA	UniRef90_A0A293MNR4 Uncharacterized protein (Fragment) n=1 Tax=Ornithodoros erraticus TaxID=265619 RepID=A0A293MNR4_ORNER	No hit	0.00896177	0	0.99996	No hit	0	0	0
AS_DN30106_c0_g1	CRG83199 cds supercontig:PIS:WF-38-12_scaffold00001:1861906:1863876:-1 gene:PISL3812_00549 gene_biotype:protein_coding transcript_biotype:protein_coding description:Heat shock 70 kDa protein	9e-52	73.6842	0	0	24.0395	Ascomycota	Heat shock 70 kDa protein (Fragment)	UniRef90_A0A1J9PVV4 Hsp72-like protein n=1 Tax=Emergomyces pasteuriana Ep9510 TaxID=1447872 RepID=A0A1J9PVV4_9EURO	Hsp70	0	0	1	No hit	0	gnl|TC-DB|P22953|1.A.33.1.1 HEAT SHOCK COGNATE 70 KDA PROTEIN 1 (HSC70.1) - Arabidopsis thaliana (Mouse-ear cress).	76.3158
AS_DN56192_c3_g1	CRG88339 cds supercontig:PIS:WF-38-12_scaffold00004:1634289:1635876:1 gene:PISL3812_05369 gene_biotype:protein_coding transcript_biotype:protein_coding description:ATP-dependent RNA helicase eIF4A	0	88.0952	0.00443083	0.0140934	21.973	Ascomycota	p-loop containing nucleoside triphosphate hydrolase	UniRef90_A0A178BNS3 Uncharacterized protein n=1 Tax=Fonsecaea multimorphosa TaxID=979981 RepID=A0A178BNS3_9EURO	No hit	0.00141051	0.00446504	0.999989	No hit	0	gnl|TC-DB|P38919|3.A.18.1.1 Eukaryotic initiation factor 4A-III - Homo sapiens (Human).	87.5
AS_DN44613_c0_g1	KFX42338 cds supercontig:ASM75011v1:scf046:152584:154042:-1 gene:GQ26_0460650 gene_biotype:protein_coding transcript_biotype:protein_coding description:Heat shock protein 16	0	79.8969	0	0.00999755	21.0184	Ascomycota	Heat shock protein 16	UniRef90_A0A2H3I524 HSP20-like chaperone n=1 Tax=Penicillium occitanis TaxID=290292 RepID=A0A2H3I524_9EURO	ACD	0	0.00321741	0.999995	No hit	0	0	0
AS_DN65416_c0_g1	KFX44916 cds supercontig:ASM75011v1:scf025:82605:83245:-1 gene:GQ26_0250300 gene_biotype:protein_coding transcript_biotype:protein_coding description:hypothetical protein	3e-137	87.6457	0	0	20.708	Ascomycota	NA	UniRef90_A0A2H3II05 Uncharacterized protein n=1 Tax=Penicillium occitanis TaxID=290292 RepID=A0A2H3II05_9EURO	No hit	0	0	1	No hit	0	0	0
AS_DN127174_c0_g1	EEA26292 cds supercontig:JCVI-PMFA1-2.0:scf_1105668340758:3289722:3292906:-1 gene:PMAA_073680 gene_biotype:protein_coding transcript_biotype:protein_coding description:heat shock protein Hsp98/Hsp104/ClpA, putative	0	90.061	0	0	19.2834	Ascomycota	ATP-dependent chaperone ClpB	UniRef90_B8M1T0 Heat shock protein Hsp98/Hsp104/ClpA, putative n=5 Tax=Eurotiales TaxID=5042 RepID=B8M1T0_TALSN	Hsp100	0	0	1	GH6	0	0	0
AS_DN48174_c1_g2	CRG87563 cds supercontig:PIS:WF-38-12_scaffold00003:2854339:2855879:1 gene:PISL3812_04581 gene_biotype:protein_coding transcript_biotype:protein_coding description:glutamine synthetase	3e-93	72.428	0	0	17.6619	Ascomycota	Glutamine synthetase	UniRef90_A0A0D1XYY0 Glutamine synthetase n=1 Tax=Verruconis gallopava TaxID=253628 RepID=A0A0D1XYY0_9PEZI	No hit	0	0	1	No hit	0	0	0
AS_DN43836_c0_g1	KFX49290 cds supercontig:ASM75011v1:scf010:769127:770993:-1 gene:GQ26_0102720 gene_biotype:protein_coding transcript_biotype:protein_coding description:Perilipin-3	0	77.2247	0	0	17.5595	Ascomycota	Pathogenesis associated protein Cap20	UniRef90_B8M6M5 Pathogenesis associated protein Cap20, putative n=5 Tax=Eurotiales TaxID=5042 RepID=B8M6M5_TALSN	No hit	0	0	1	No hit	0	0	0
AS_DN52190_c1_g1	EED17042 cds supercontig:JCVI-TSTA1-3.0:scf_1105507295549:3411138:3413551:-1 gene:TSTA_021030 gene_biotype:protein_coding transcript_biotype:protein_coding description:molecular chaperone and allergen Mod-E/Hsp90/Hsp1	0	91.2073	0	0	16.9335	Ascomycota	NA	UniRef90_A0A0D2BBE6 Hsp90-like protein n=1 Tax=Verruconis gallopava TaxID=253628 RepID=A0A0D2BBE6_9PEZI	Hsp90	0	0	1	No hit	0	gnl|TC-DB|P08238|8.A.163.1.1 Heat shock protein HSP 90-beta OS=Homo sapiens OX=9606 GN=HSP90AB1 PE=1 SV=4	85.8268
AS_DN128348_c0_g1	EEA21869 cds supercontig:JCVI-PMFA1-2.0:scf_1105668340984:1787637:1788822:-1 gene:PMAA_056600 gene_biotype:protein_coding transcript_biotype:protein_coding description:DUF757 domain protein	6e-164	89.7778	0	0	14.3325	Ascomycota	Polysaccharide biosynthesis protein	UniRef90_B6QL92 DUF757 domain protein n=5 Tax=Talaromyces marneffei TaxID=37727 RepID=B6QL92_TALMQ	No hit	0	0	1	No hit	0	0	0
AS_DN57420_c0_g1	CRG89027 cds supercontig:PIS:WF-38-12_scaffold00005:1662413:1665692:-1 gene:PISL3812_06062 gene_biotype:protein_coding transcript_biotype:protein_coding description:elongation factor EF-3	0	76.1994	0.00217422	0	12.611	Ascomycota	Translation elongation factor eEF-3	UniRef90_R7YP62 Elongation factor 3 n=1 Tax=Coniosporium apollinis (strain CBS 100218) TaxID=1168221 RepID=R7YP62_CONA1	No hit	0	0	1	No hit	0	0	0
AS_DN49594_c0_g1	KFX49243 cds supercontig:ASM75011v1:scf010:676120:678758:-1 gene:GQ26_0102360 gene_biotype:protein_coding transcript_biotype:protein_coding description:Kelch-like protein 38	0	94.1542	0	0.00776765	12.3016	Ascomycota	BTB/POZ fold	UniRef90_A0A093XVF7 Kelch-like protein 38 n=4 Tax=Eurotiales TaxID=5042 RepID=A0A093XVF7_TALMA	No hit	0	0.00298993	0.999996	No hit	0	0	0
AS_DN23733_c0_g1	EEA28002 cds supercontig:JCVI-PMFA1-2.0:scf_1105668340764:3503242:3505107:-1 gene:PMAA_028290 gene_biotype:protein_coding transcript_biotype:protein_coding description:conserved hypothetical protein	0	93.6404	0	0	11.8176	Ascomycota	DDHD domain-containing protein	UniRef90_B8LTP6 Uncharacterized protein n=5 Tax=Eurotiales TaxID=5042 RepID=B8LTP6_TALSN	No hit	0	0	1	No hit	0	0	0
AS_DN2177_c0_g1	KFX41833 cds supercontig:ASM75011v1:scf053:83353:85256:-1 gene:GQ26_0530300 gene_biotype:protein_coding transcript_biotype:protein_coding description:Protein psi1	0	87.5223	0	0	10.9032	Ascomycota	DnaJ domain-containing protein Psi	UniRef90_B6QG86 DnaJ domain protein Psi, putative n=3 Tax=Eurotiales TaxID=5042 RepID=B6QG86_TALMQ	DnaJ	0	0	1	No hit	0	0	0
AS_DN47561_c0_g1	EED23465 cds supercontig:JCVI-TSTA1-3.0:scf_1105507295523:2608417:2609330:1 gene:TSTA_068890 gene_biotype:protein_coding transcript_biotype:protein_coding description:60S ribosomal protein L10	1e-105	88.2716	0.0303804	0.0383025	10.5233	Ascomycota	60S ribosomal protein L10-A	UniRef90_A0A0H1B8H6 60S ribosomal protein L10-A n=1 Tax=Emmonsia parva UAMH 139 TaxID=1246674 RepID=A0A0H1B8H6_9EURO	No hit	0.0122413	0.015374	0.999807	No hit	0	0	0
AS_DN52085_c0_g1	CRG89373 cds supercontig:PIS:WF-38-12_scaffold00006:604511:605758:1 gene:PISL3812_06409 gene_biotype:protein_coding transcript_biotype:protein_coding description:Mitochondrial phosphate carrier protein	2e-166	72.7829	0	0	10.0348	Ascomycota	Mitochondrial substrate/solute carrier	UniRef90_R7YK01 Uncharacterized protein n=1 Tax=Coniosporium apollinis (strain CBS 100218) TaxID=1168221 RepID=R7YK01_CONA1	No hit	0	0	1	No hit	0	0	0
AS_DN43103_c1_g1	EEA22506 cds supercontig:JCVI-PMFA1-2.0:scf_1105668340752:273819:277016:-1 gene:PMAA_091340 gene_biotype:protein_coding transcript_biotype:protein_coding description:translation elongation factor eEF-3, putative	0	86.4583	0	0	9.33066	Ascomycota	Elongation factor 3	UniRef90_C4JX77 Elongation factor 3 n=5 Tax=Onygenales TaxID=33183 RepID=C4JX77_UNCRE	No hit	0	0	1	No hit	0	0	0
AS_DN47788_c0_g1	GAM43254 cds supercontig:TcelY94_1.0:DF933843.1:471591:473981:-1 gene:TCE0_047r17916 gene_biotype:protein_coding transcript_biotype:protein_coding description:hypothetical protein	0	87.8205	0.00697727	0	8.9305	Ascomycota	Bifunctional pinoresinol-lariciresinol reductase 2	UniRef90_A0A2H3ISH5 Uncharacterized protein n=1 Tax=Penicillium occitanis TaxID=290292 RepID=A0A2H3ISH5_9EURO	No hit	0.00302883	0	0.999995	No hit	0	0	0
AS_DN41024_c0_g1	EEA20503 cds supercontig:JCVI-PMFA1-2.0:scf_1105668340738:1237554:1237865:-1 gene:PMAA_043400 gene_biotype:protein_coding transcript_biotype:protein_coding description:conserved hypothetical protein	1e-109	90.9385	0	0	8.83804	Ascomycota	Putative phosphoenolpyruvate synthase regulatory protein	UniRef90_B6QRA1 Uncharacterized protein n=3 Tax=Eurotiales TaxID=5042 RepID=B6QRA1_TALMQ	No hit	0	0	1	No hit	0	0	0
AS_DN76995_c0_g1	KFX44818 cds supercontig:ASM75011v1:scf026:233405:234160:1 gene:GQ26_0260800 gene_biotype:protein_coding transcript_biotype:protein_coding description:SDO1-like protein C21C3.19	2e-128	73.0594	0	0	8.58789	Ascomycota	Ribosome maturation protein SBDS, N-terminal	UniRef90_B8LZ40 RNA binding protein, putative n=2 Tax=Talaromyces TaxID=5094 RepID=B8LZ40_TALSN	No hit	0	0	1	No hit	0	0	0
AS_DN37204_c0_g1	KFX47104 cds supercontig:ASM75011v1:scf016:391874:394521:-1 gene:GQ26_0161420 gene_biotype:protein_coding transcript_biotype:protein_coding description:Heat shock 70 kDa protein	7e-113	85.8974	0	0	8.522	Ascomycota	Heat shock protein 70 (Fragment)	UniRef90_Q6QZR2 70 kDa heat shock protein (Fragment) n=1 Tax=Arthroderma otae TaxID=63405 RepID=Q6QZR2_ARTOT	Hsp70	0	0	1	No hit	0	gnl|TC-DB|P10591|3.A.16.1.6 Heat shock protein SSA1 OS=Saccharomyces cerevisiae (strain ATCC 204508 / S288c) OX=559292 GN=SSA1 PE=1 SV=4	93.8462
AS_DN41220_c0_g1	KFX44915 cds supercontig:ASM75011v1:scf025:80925:82554:-1 gene:GQ26_0250290 gene_biotype:protein_coding transcript_biotype:protein_coding description:50S ribosomal protein L25	0	87.7953	0.0102407	0.0187751	8.373	Ascomycota	50S ribosomal protein L25	UniRef90_A0A2H3IMS8 Uncharacterized protein n=1 Tax=Penicillium occitanis TaxID=290292 RepID=A0A2H3IMS8_9EURO	No hit	0.00455269	0.00831169	0.999955	No hit	0	0	0
AS_DN31434_c0_g1	CRG87685 cds supercontig:PIS:WF-38-12_scaffold00003:3246570:3247913:-1 gene:PISL3812_04705 gene_biotype:protein_coding transcript_biotype:protein_coding description:transaldolase	0	76.7894	0	0.0571845	8.26879	Ascomycota	Transaldolase	UniRef90_A0A1Y1Z1N0 Transaldolase n=1 Tax=Clohesyomyces aquaticus TaxID=1231657 RepID=A0A1Y1Z1N0_9PLEO	No hit	0	0.0249666	0.999688	No hit	0	0	0
AS_DN114784_c0_g1	EED21445 cds supercontig:JCVI-TSTA1-3.0:scf_1105507295527:1724071:1724743:-1 gene:TSTA_086780 gene_biotype:protein_coding transcript_biotype:protein_coding description:40S ribosomal protein S25, putative	4e-129	89.644	0	0	8.20509	Ascomycota	Winged helix-turn-helix transcription repressor DNA-binding	UniRef90_B8M0R2 40S ribosomal protein S25, putative n=13 Tax=leotiomyceta TaxID=716546 RepID=B8M0R2_TALSN	No hit	0	0	1	No hit	0	0	0
AS_DN46259_c0_g2	KFX52811 cds supercontig:ASM75011v1:scf002:580162:582927:-1 gene:GQ26_0022110 gene_biotype:protein_coding transcript_biotype:protein_coding description:Iron sulfur cluster assembly protein 1, mitochondrial	0	83.0894	0	0	8.12828	Ascomycota	Iron sulfur cluster assembly protein 1, mitochondrial	UniRef90_A0A093W1R6 Iron-sulfur cluster assembly protein n=3 Tax=Talaromyces marneffei PM1 TaxID=1077442 RepID=A0A093W1R6_TALMA	No hit	0	0	1	No hit	0	0	0
AS_DN41598_c0_g1	KFX42229 cds supercontig:ASM75011v1:scf047:100124:107601:1 gene:GQ26_0470390 gene_biotype:protein_coding transcript_biotype:protein_coding description:Peroxisomal membrane protein PMP47B	0	84.1321	0	0	8.03944	Ascomycota	Rna-binding protein fus tls	UniRef90_A0A2H3IS08 WW/Rsp5/WWP n=1 Tax=Penicillium occitanis TaxID=290292 RepID=A0A2H3IS08_9EURO	No hit	0	0	1	No hit	0	0	0
AS_DN39290_c0_g1	KFX51011 cds supercontig:ASM75011v1:scf006:710203:711289:-1 gene:GQ26_0062720 gene_biotype:protein_coding transcript_biotype:protein_coding description:Chitin synthase 2	0	84.6535	0	0	8.025	Ascomycota	High expression lethality protein Hel10	UniRef90_A0A2H3IL48 Ribosomal protein S2, bacteria/mitochondria/plastid n=1 Tax=Penicillium occitanis TaxID=290292 RepID=A0A2H3IL48_9EURO	No hit	0	0	1	No hit	0	0	0
AS_DN44646_c0_g1	KFX47181 cds supercontig:ASM75011v1:scf016:550543:552127:-1 gene:GQ26_0162030 gene_biotype:protein_coding transcript_biotype:protein_coding description:Acyl-CoA desaturase	0	91.0686	0	0	8.01103	Ascomycota	Acyl-CoA desaturase	UniRef90_B8M3X2 Acyl-CoA desaturase n=5 Tax=Eurotiales TaxID=5042 RepID=B8M3X2_TALSN	No hit	0	0	1	No hit	0	0	0
AS_DN51930_c0_g1	KFX48368 cds supercontig:ASM75011v1:scf012:251462:253558:1 gene:GQ26_0120900 gene_biotype:protein_coding transcript_biotype:protein_coding description:Glyceraldehyde-3-phosphate dehydrogenase	0	74.0536	0	0	7.86383	Ascomycota	Glyceraldehyde-3-phosphate dehydrogenase	UniRef90_A0A2P8ABU6 Glyceraldehyde-3-phosphate dehydrogenase n=1 Tax=Elsinoe australis TaxID=40998 RepID=A0A2P8ABU6_9PEZI	No hit	0	0	1	No hit	0	0	0
AS_DN45936_c1_g1	KFX43798 cds supercontig:ASM75011v1:scf032:56767:59397:1 gene:GQ26_0320220 gene_biotype:protein_coding transcript_biotype:protein_coding description:Transaldolase	0	91.1458	0.0114797	0	7.58835	Ascomycota	Transaldolase	UniRef90_B8MD42 Transaldolase n=7 Tax=Eurotiales TaxID=5042 RepID=B8MD42_TALSN	No hit	0.00530789	0	0.999986	No hit	0	0	0
AS_DN11938_c0_g1	KFX42404 cds supercontig:ASM75011v1:scf045:151797:154170:-1 gene:GQ26_0450520 gene_biotype:protein_coding transcript_biotype:protein_coding description:Heat shock protein 90	4e-105	84.6561	0	0	7.57767	Ascomycota	NA	UniRef90_A0A167W9E3 ATP-dependent molecular chaperone HSC82 n=1 Tax=Ascosphaera apis ARSEF 7405 TaxID=392613 RepID=A0A167W9E3_9EURO	Hsp90	0	0	1	No hit	0	0	0
AS_DN49975_c0_g1	KFX47268 cds supercontig:ASM75011v1:scf015:42782:45519:1 gene:GQ26_0150170 gene_biotype:protein_coding transcript_biotype:protein_coding description:Negative regulator of sexual conjugation and meiosis	0	93.6675	0.00515117	0	7.46844	Ascomycota	Negative regulator of sexual conjugation and meiosis	UniRef90_A0A2H3IJ68 Uncharacterized protein n=1 Tax=Penicillium occitanis TaxID=290292 RepID=A0A2H3IJ68_9EURO	No hit	0.00240501	0	0.999997	No hit	0	0	0
AS_DN49071_c0_g1	KFX45709 cds supercontig:ASM75011v1:scf022:315633:317363:-1 gene:GQ26_0221000 gene_biotype:protein_coding transcript_biotype:protein_coding description:hypothetical protein	0	86.828	0	0	7.43156	Ascomycota	NA	UniRef90_A0A2H3I0P9 Uncharacterized protein n=1 Tax=Penicillium occitanis TaxID=290292 RepID=A0A2H3I0P9_9EURO	No hit	0	0	1	No hit	SP(Sec/SPI)	0	0
AS_DN39778_c0_g1	GAM40208 cds supercontig:TcelY94_1.0:DF933834.1:227722:229970:1 gene:TCE0_038f12371 gene_biotype:protein_coding transcript_biotype:protein_coding description:mitochondrial matrix ATPase subunit	0	96.3178	0	0	7.37072	Ascomycota	NA	UniRef90_B8MC54 Mitochondrial Hsp70 chaperone (Ssc70), putative n=11 Tax=Eurotiales TaxID=5042 RepID=B8MC54_TALSN	Hsp70	0	0	1	No hit	0	0	0
AS_DN35743_c0_g1	KFX43629 cds supercontig:ASM75011v1:scf034:237891:239172:1 gene:GQ26_0340840 gene_biotype:protein_coding transcript_biotype:protein_coding description:Eukaryotic translation initiation factor 5A	0	79.8291	0	0	7.2589	Ascomycota	Eukaryotic translation initiation factor eIF-5A	UniRef90_B8MGI1 Eukaryotic translation initiation factor 5A n=7 Tax=Eurotiales TaxID=5042 RepID=B8MGI1_TALSN	No hit	0	0	1	No hit	0	0	0
AS_DN29935_c0_g1	KFX52682 cds supercontig:ASM75011v1:scf002:315567:317142:1 gene:GQ26_0021100 gene_biotype:protein_coding transcript_biotype:protein_coding description:Mitochondrial phosphate carrier protein	2e-180	82.1107	0	0	7.23467	Ascomycota	NA	UniRef90_A0A1Y1NCW5 Uncharacterized protein (Fragment) n=1 Tax=Photinus pyralis TaxID=7054 RepID=A0A1Y1NCW5_PHOPY	No hit	0	0	1	No hit	0	0	0
AS_DN56192_c2_g1	KFX49935 cds supercontig:ASM75011v1:scf008:346553:348459:-1 gene:GQ26_0081350 gene_biotype:protein_coding transcript_biotype:protein_coding description:ATP-dependent RNA helicase eIF4A	2e-102	84.1424	0	0	7.21111	Ascomycota	NA	UniRef90_A0A177DP42 p-loop containing nucleoside triphosphate hydrolase protein n=8 Tax=leotiomyceta TaxID=716546 RepID=A0A177DP42_ALTAL	No hit	0	0	1	No hit	0	gnl|TC-DB|P38919|3.A.18.1.1 Eukaryotic initiation factor 4A-III - Homo sapiens (Human).	93.2039
AS_DN106032_c0_g1	KFX43233 cds supercontig:ASM75011v1:scf037:196635:197272:-1 gene:GQ26_0370750 gene_biotype:protein_coding transcript_biotype:protein_coding description:hypothetical protein	5e-114	90.3846	0.050404	0.0881039	7.11294	Ascomycota	NA	UniRef90_A0A093XDE2 Uncharacterized protein n=3 Tax=Eurotiales TaxID=5042 RepID=A0A093XDE2_TALMA	No hit	0.0234642	0.0402896	0.998912	No hit	0	0	0
AS_DN6747_c0_g1	KFX42677 cds supercontig:ASM75011v1:scf042:203047:204383:1 gene:GQ26_0420720 gene_biotype:protein_coding transcript_biotype:protein_coding description:hypothetical protein	0	92.3754	0	0	7.04683	Ascomycota	Nucleotide-binding, alpha-beta plait	UniRef90_A0A2H3IX83 Nucleotide-binding, alpha-beta plait n=1 Tax=Penicillium occitanis TaxID=290292 RepID=A0A2H3IX83_9EURO	No hit	0	0	1	No hit	0	0	0
AS_DN23388_c0_g1	KFX41866 cds supercontig:ASM75011v1:scf052:35394:36463:1 gene:GQ26_0520120 gene_biotype:protein_coding transcript_biotype:protein_coding description:Histone H2A	1e-79	72.2222	0	0	6.97924	Ascomycota	NA	No hits	No hit	0	0	1	No hit	0	0	0
AS_DN33014_c0_g1	KFX50046 cds supercontig:ASM75011v1:scf008:592317:593338:1 gene:GQ26_0082210 gene_biotype:protein_coding transcript_biotype:protein_coding description:Multiprotein-bridging factor 1	0	91.2951	0	0	6.95827	Ascomycota	Multiprotein-bridging factor	UniRef90_B8MTC2 Coactivator bridging factor 1 (Mbf1), putative n=6 Tax=Eurotiales TaxID=5042 RepID=B8MTC2_TALSN	No hit	0	0	1	No hit	0	0	0
AS_DN34344_c0_g1	EEA25574 cds supercontig:JCVI-PMFA1-2.0:scf_1105668340758:1324609:1325187:1 gene:PMAA_066780 gene_biotype:protein_coding transcript_biotype:protein_coding description:hypothetical protein	1e-95	72.4537	0	0	6.80379	Ascomycota	NA	UniRef90_A0A2H3IF76 Uncharacterized protein n=2 Tax=Eurotiales TaxID=5042 RepID=A0A2H3IF76_9EURO	No hit	0	0	1	No hit	0	0	0
AS_DN49111_c0_g1	KFX47463 cds supercontig:ASM75011v1:scf015:509300:519436:-1 gene:GQ26_0151720 gene_biotype:protein_coding transcript_biotype:protein_coding description:Translational activator GCN1	1e-157	83.6918	0	0.198344	6.76761	Ascomycota	NA	UniRef90_A0A0H1BFN2 Uncharacterized protein n=1 Tax=Emmonsia parva UAMH 139 TaxID=1246674 RepID=A0A0H1BFN2_9EURO	No hit	0	0.0879234	0.996127	No hit	0	0	0
AS_DN46091_c0_g1	KFX50381 cds supercontig:ASM75011v1:scf007:348166:349540:-1 gene:GQ26_0071240 gene_biotype:protein_coding transcript_biotype:protein_coding description:Uncharacterized protein	6e-175	86.5562	0	0	6.72902	Ascomycota	Mismatched base pair and cruciform DNA recognition	UniRef90_A0A093VUT4 Uncharacterized protein n=3 Tax=Eurotiales TaxID=5042 RepID=A0A093VUT4_TALMA	No hit	0	0	1	No hit	0	0	0
AS_DN44715_c0_g1	EED23669 cds supercontig:JCVI-TSTA1-3.0:scf_1105507295523:3113423:3115026:1 gene:TSTA_070760 gene_biotype:protein_coding transcript_biotype:protein_coding description:GPI-anchored cell wall organization protein Ecm33	0	87.9167	0.0921962	0.363086	6.67704	Ascomycota	GPI-anchored cell wall organization protein Ecm33	UniRef90_B8LTS7 GPI-anchored cell wall organization protein Ecm33 n=2 Tax=Eurotiales TaxID=5042 RepID=B8LTS7_TALSN	No hit	0.0427379	0.150108	0.987745	No hit	SP(Sec/SPI)	0	0
AS_DN39255_c0_g1	OKL64042 cds supercontig:ASM190759v1:scaffold_0:1655256:1656902:1 gene:UA08_00593 gene_biotype:protein_coding transcript_biotype:protein_coding description:Glutamine synthetase	2e-147	73.0392	0	0	6.58932	Ascomycota	Glutamine synthetase	UniRef90_A0A1Y1ZCH7 Glutamine synthetase n=1 Tax=Clohesyomyces aquaticus TaxID=1231657 RepID=A0A1Y1ZCH7_9PLEO	No hit	0	0	1	No hit	0	0	0
AS_DN90050_c0_g1	GAM37329 cds supercontig:TcelY94_1.0:DF933819.1:359632:359913:-1 gene:TCE0_023r07167 gene_biotype:protein_coding transcript_biotype:protein_coding description:hypothetical protein	2e-137	83.6364	0	0	6.57572	Ascomycota	Putative Catalytic activity: An alcohol NAD( ) = an aldehyde or ketone NADH	UniRef90_A0A2H3ISI0 Uncharacterized protein n=2 Tax=Eurotiales TaxID=5042 RepID=A0A2H3ISI0_9EURO	No hit	0	0	1	No hit	0	0	0
AS_DN134129_c0_g1	EEA24052 cds supercontig:JCVI-PMFA1-2.0:scf_1105668340960:1089490:1091271:-1 gene:PMAA_080700 gene_biotype:protein_coding transcript_biotype:protein_coding description:glutamine synthetase	2e-142	97	0	0	6.43441	Ascomycota	Glutamine synthetase	UniRef90_B8M9G2 Glutamine synthetase n=6 Tax=Eurotiales TaxID=5042 RepID=B8M9G2_TALSN	No hit	0	0	1	No hit	0	0	0
AS_DN27271_c0_g1	OKL57283 cds supercontig:ASM190759v1:scaffold_11:802444:802926:-1 gene:UA08_07561 gene_biotype:protein_coding transcript_biotype:protein_coding description:putative ribose 5-phosphate isomerase	7e-134	83.7449	0	0	6.2187	Ascomycota	Ribose 5-phosphate isomerase RpiB	UniRef90_A0A225AE36 Putative ribose 5-phosphate isomerase n=1 Tax=Talaromyces atroroseus TaxID=1441469 RepID=A0A225AE36_9EURO	No hit	0	0	1	No hit	0	0	0
AS_DN130773_c0_g1	EEA24041 cds supercontig:JCVI-PMFA1-2.0:scf_1105668340960:1061962:1063439:1 gene:PMAA_080590 gene_biotype:protein_coding transcript_biotype:protein_coding description:aspartic endopeptidase(AP1), putative	2e-153	86.7965	0	0	6.11208	Ascomycota	Acid protease (Fragment)	UniRef90_A0A2H3J9S0 Peptidase aspartic, catalytic n=1 Tax=Penicillium occitanis TaxID=290292 RepID=A0A2H3J9S0_9EURO	No hit	0	0	1	No hit	0	0	0
AS_DN88037_c0_g1	KFX49160 cds supercontig:ASM75011v1:scf010:504875:505645:1 gene:GQ26_0101810 gene_biotype:protein_coding transcript_biotype:protein_coding description:Eukaryotic translation initiation factor 1A	0	96.4444	0	0	6.09903	Ascomycota	Eukaryotic translation initiation factor eIF-1A subunit	UniRef90_B8M4U9 Eukaryotic translation initiation factor eIF-1A subunit, putative n=11 Tax=Eurotiomycetes TaxID=147545 RepID=B8M4U9_TALSN	No hit	0	0	1	No hit	0	0	0
AS_DN36360_c0_g1	EEA25736 cds supercontig:JCVI-PMFA1-2.0:scf_1105668340758:1724121:1726841:-1 gene:PMAA_068310 gene_biotype:protein_coding transcript_biotype:protein_coding description:Hsp70 chaperone Hsp88	0	86.1912	0	0	6.09756	Ascomycota	Heat shock protein (Eurofung)	UniRef90_A0A093UUZ6 Heat shock protein Hsp88 n=2 Tax=Talaromyces marneffei TaxID=37727 RepID=A0A093UUZ6_TALMA	Hsp70	0	0	1	No hit	0	0	0
AS_DN39007_c0_g1	KFX43286 cds supercontig:ASM75011v1:scf036:33356:35327:1 gene:GQ26_0360170 gene_biotype:protein_coding transcript_biotype:protein_coding description:1,3-beta-glucanosyltransferase gel4	0	86.5574	0	0	6.06322	Ascomycota	1,3-beta-glucanosyltransferase	UniRef90_A0A2H3IDH9 1,3-beta-glucanosyltransferase n=1 Tax=Penicillium occitanis TaxID=290292 RepID=A0A2H3IDH9_9EURO	No hit	0	0	1	GH72(2)	0	0	0
AS_DN8534_c0_g1	KFX45803 cds supercontig:ASM75011v1:scf021:53308:56009:1 gene:GQ26_0210200 gene_biotype:protein_coding transcript_biotype:protein_coding description:Heat shock protein SSB1	0	94.7791	0.00826607	0	6.05275	Ascomycota	NA	UniRef90_C8VLW2 Heat shock protein 70 [Source:UniProtKB/TrEMBLAcc:O42808] n=1 Tax=Emericella nidulans (strain FGSC A4 / ATCC 38163 / CBS 112.46 / NRRL 194 / M139) TaxID=227321 RepID=C8VLW2_EMENI	Hsp70	0.00421416	0	0.999991	No hit	0	0	0
AS_DN30872_c0_g1	EED19619 cds supercontig:JCVI-TSTA1-3.0:scf_1105507295541:1556500:1557632:1 gene:TSTA_029000 gene_biotype:protein_coding transcript_biotype:protein_coding description:conserved hypothetical protein	5e-120	84.6914	0	0	5.99773	Ascomycota	NA	UniRef90_B8M513 Uncharacterized protein n=1 Tax=Talaromyces stipitatus (strain ATCC 10500 / CBS 375.48 / QM 6759 / NRRL 1006)TaxID=441959 RepID=B8M513_TALSN	No hit	0	0	1	No hit	0	0	0
AS_DN49272_c0_g1	EEA22506 cds supercontig:JCVI-PMFA1-2.0:scf_1105668340752:273819:277016:-1 gene:PMAA_091340 gene_biotype:protein_coding transcript_biotype:protein_coding description:translation elongation factor eEF-3, putative	0	77.0739	0	0	5.96719	Ascomycota	Elongation factor 3	UniRef90_A0A150V7D4 Uncharacterized protein n=1 Tax=Acidomyces richmondensis BFW TaxID=766039 RepID=A0A150V7D4_9PEZI	No hit	0	0	1	No hit	0	0	0
AS_DN78100_c0_g1	KFX43284 cds supercontig:ASM75011v1:scf036:28968:29740:1 gene:GQ26_0360130 gene_biotype:protein_coding transcript_biotype:protein_coding description:Glycogen phosphorylase	4e-145	92.2222	0	0	5.91473	Ascomycota	Glycogen phosphorylase	UniRef90_B8M9S9 CipC-like antibiotic response protein, putative n=4 Tax=Eurotiales TaxID=5042 RepID=B8M9S9_TALSN	No hit	0	0	1	No hit	0	0	0
AS_DN74747_c0_g1	EEA28461 cds supercontig:JCVI-PMFA1-2.0:scf_1105668340764:4718262:4719218:1 gene:PMAA_032700 gene_biotype:protein_coding transcript_biotype:protein_coding description:thioredoxin TrxA	2e-158	78.826	0	0	5.89815	Ascomycota	Thioredoxin TrxA	UniRef90_B8LTD6 Thioredoxin TrxA n=5 Tax=Talaromyces TaxID=5094 RepID=B8LTD6_TALSN	No hit	0	0	1	No hit	0	0	0
AS_DN81351_c0_g1	KFX43261 cds supercontig:ASM75011v1:scf037:264228:264991:-1 gene:GQ26_0370990 gene_biotype:protein_coding transcript_biotype:protein_coding description:hypothetical protein	1e-150	89.8551	0	0	5.83942	Ascomycota	NA	UniRef90_A0A2H3JAF7 Uncharacterized protein n=1 Tax=Penicillium occitanis TaxID=290292 RepID=A0A2H3JAF7_9EURO	No hit	0	0	1	No hit	0	0	0
AS_DN47373_c0_g1	EED16186 cds supercontig:JCVI-TSTA1-3.0:scf_1105507295549:1191701:1196238:1 gene:TSTA_012930 gene_biotype:protein_coding transcript_biotype:protein_coding description:LEA domain protein	0	78.1534	0.0035807	0	5.82089	Ascomycota	LEA domain-containing protein	UniRef90_A0A2H3IVL6 Uncharacterized protein n=1 Tax=Penicillium occitanis TaxID=290292 RepID=A0A2H3IVL6_9EURO	No hit	0.00186162	0	0.999998	No hit	0	0	0
AS_DN32730_c0_g1	KFX48099 cds supercontig:ASM75011v1:scf013:443408:447586:1 gene:GQ26_0131680 gene_biotype:protein_coding transcript_biotype:protein_coding description:ATP-dependent RNA helicase dbp2	7e-153	85.101	0	0	5.75992	Ascomycota	Putative atp-dependent rna helicase dbp-2 protein	UniRef90_A0A2H3I8X5 Uncharacterized protein n=1 Tax=Penicillium occitanis TaxID=290292 RepID=A0A2H3I8X5_9EURO	No hit	0	0	1	No hit	0	0	0
AS_DN39248_c0_g1	EED24333 cds supercontig:JCVI-TSTA1-3.0:scf_1105507295523:4755055:4757500:-1 gene:TSTA_076990 gene_biotype:protein_coding transcript_biotype:protein_coding description:60S ribosomal protein L1	2e-121	78.8991	0	0	5.6826	Ascomycota	NA	UniRef90_U1GGC7 Ribosomal protein n=1 Tax=Endocarpon pusillum (strain Z07020 / HMAS-L-300199) TaxID=1263415 RepID=U1GGC7_ENDPU	No hit	0	0	1	No hit	0	0	0
AS_DN34991_c0_g1	KFX41672 cds supercontig:ASM75011v1:scf055:2131:3564:1 gene:GQ26_0550020 gene_biotype:protein_coding transcript_biotype:protein_coding description:Protein wos2	0	76.8794	0	0	5.47506	Ascomycota	Hsp90 binding co-chaperone	UniRef90_B8MBP3 Hsp90 binding co-chaperone (Sba1), putative n=2 Tax=Talaromyces stipitatus (strain ATCC 10500 / CBS 375.48/ QM 6759 / NRRL 1006) TaxID=441959 RepID=B8MBP3_TALSN	No hit	0	0	1	No hit	0	0	0
AS_DN34000_c0_g1	KFX48183 cds supercontig:ASM75011v1:scf013:637507:639298:1 gene:GQ26_0132360 gene_biotype:protein_coding transcript_biotype:protein_coding description:Peptidyl-prolyl cis-trans isomerase,mitochondrial	2e-147	91.2698	0	0	5.4619	Ascomycota	Peptidyl-prolyl cis-trans isomerase (Fragment)	UniRef90_A0A093VDX6 Peptidyl-prolyl cis-trans isomerase n=3 Tax=Talaromyces marneffei TaxID=37727 RepID=A0A093VDX6_TALMA	No hit	0	0	1	No hit	0	0	0
AS_DN29056_c0_g1	KFX50125 cds supercontig:ASM75011v1:scf008:728583:729824:-1 gene:GQ26_0082780 gene_biotype:protein_coding transcript_biotype:protein_coding description:Hsp70 nucleotide exchange factor fes1	0	84.3227	0	0	5.40423	Ascomycota	Nucleotide exchange factor Fes1	UniRef90_B8MTN3 Hsp70 nucleotide exchange factor (Fes1), putative n=4 Tax=Eurotiales TaxID=5042 RepID=B8MTN3_TALSN	No hit	0	0	1	No hit	0	0	0
AS_DN92043_c0_g1	KFX50381 cds supercontig:ASM75011v1:scf007:348166:349540:-1 gene:GQ26_0071240 gene_biotype:protein_coding transcript_biotype:protein_coding description:Uncharacterized protein	1e-71	77.2358	0	0	5.31502	Ascomycota	Mismatched base pair and cruciform DNA recognition	UniRef90_A0A093VUT4 Uncharacterized protein n=3 Tax=Eurotiales TaxID=5042 RepID=A0A093VUT4_TALMA	No hit	0	0	1	No hit	0	0	0
AS_DN31710_c0_g1	KFX46091 cds supercontig:ASM75011v1:scf020:202761:205150:-1 gene:GQ26_0200760 gene_biotype:protein_coding transcript_biotype:protein_coding description:ATP-dependent RNA helicase ded1	0	85.4077	0	0	5.26489	Ascomycota	NA	UniRef90_V5FFP9 ATP dependent RNA helicase (Dbp1), putative n=1 Tax=Byssochlamys spectabilis (strain No. 5 / NBRC 109023)TaxID=1356009 RepID=V5FFP9_BYSSN	No hit	0	0	1	No hit	0	0	0
AS_DN43537_c0_g1	KFX48367 cds supercontig:ASM75011v1:scf012:249692:250525:1 gene:GQ26_0120890 gene_biotype:protein_coding transcript_biotype:protein_coding description:Inorganic phosphate transport protein PHO88	0	94.3563	0	0	5.25985	Ascomycota	Inorganic phosphate transporter	UniRef90_B8LXQ2 Phosphate transporter (Pho88), putative n=5 Tax=Eurotiales TaxID=5042 RepID=B8LXQ2_TALSN	No hit	0	0	1	No hit	0	0	0
AS_DN120248_c0_g1	KFX47556 cds supercontig:ASM75011v1:scf014:33448:35552:1 gene:GQ26_0140140 gene_biotype:protein_coding transcript_biotype:protein_coding description:putative CDP-alcohol phosphatidyltransferase class-I family protein C22A12.08c	0	83.3019	0	0	5.20156	Ascomycota	Cat eye syndrome critical region protein 5	UniRef90_A0A2H3IZ35 HAD-superfamily hydrolase, subfamily IIA, CECR5 n=4 Tax=Eurotiales TaxID=5042 RepID=A0A2H3IZ35_9EURO	No hit	0	0	1	No hit	0	0	0
AS_DN44650_c0_g1	KFX44083 cds supercontig:ASM75011v1:scf030:34641:36252:1 gene:GQ26_0300140 gene_biotype:protein_coding transcript_biotype:protein_coding description:Thiamine thiazole synthase	0	92.1393	0	0	5.00779	Ascomycota	Thiamine thiazole synthase	UniRef90_B8M1K3 Thiamine thiazole synthase n=6 Tax=Eurotiales TaxID=5042 RepID=B8M1K3_TALSN	No hit	0	0	1	No hit	0	0	0
AS_DN31245_c0_g1	CRG88339 cds supercontig:PIS:WF-38-12_scaffold00004:1634289:1635876:1 gene:PISL3812_05369 gene_biotype:protein_coding transcript_biotype:protein_coding description:ATP-dependent RNA helicase eIF4A	2e-138	85.1351	0	0	4.97862	Ascomycota	NA	UniRef90_W9XLK2 ATP-dependent RNA helicase eIF4A n=1 Tax=Capronia epimyces CBS 606.96 TaxID=1182542 RepID=W9XLK2_9EURO	No hit	0	0	1	No hit	0	gnl|TC-DB|P38919|3.A.18.1.1 Eukaryotic initiation factor 4A-III - Homo sapiens (Human).	89.8649
AS_DN894_c0_g1	EED24181 cds supercontig:JCVI-TSTA1-3.0:scf_1105507295523:4379950:4381116:-1 gene:TSTA_075530 gene_biotype:protein_coding transcript_biotype:protein_coding description:eukaryotic translation elongation factor 1 subunit Eef1-beta, putative	6e-94	71.4976	0	0	4.96308	Ascomycota	Translation elongation factor 1 subunit beta	UniRef90_H6BVG8 Elongation factor EF-1 beta subunit n=9 Tax=Herpotrichiellaceae TaxID=43219 RepID=H6BVG8_EXODN	No hit	0	0	1	No hit	0	0	0
AS_DN28085_c0_g1	KFX42201 cds supercontig:ASM75011v1:scf047:26092:28268:1 gene:GQ26_0470140 gene_biotype:protein_coding transcript_biotype:protein_coding description:SWIRM domain-containing protein FUN19	0	90.5018	0	0	4.95915	Ascomycota	SWIRM domain	UniRef90_B8MIK5 SWIRM domain protein Fun19, putative n=4 Tax=Eurotiales TaxID=5042 RepID=B8MIK5_TALSN	No hit	0	0	1	No hit	0	0	0
AS_DN89434_c0_g1	KFX47463 cds supercontig:ASM75011v1:scf015:509300:519436:-1 gene:GQ26_0151720 gene_biotype:protein_coding transcript_biotype:protein_coding description:Translational activator GCN1	8e-127	90.8257	0	0.072089	4.93195	Ascomycota	NA	UniRef90_A0A0H1BFN2 Uncharacterized protein n=1 Tax=Emmonsia parva UAMH 139 TaxID=1246674 RepID=A0A0H1BFN2_9EURO	No hit	0	0.0390686	0.999237	No hit	0	0	0
AS_DN34960_c0_g1	KFX43271 cds supercontig:ASM75011v1:scf036:1268:2846:-1 gene:GQ26_0360020 gene_biotype:protein_coding transcript_biotype:protein_coding description:6-phosphogluconate phosphatase	0	93.0265	0	0	4.92239	Ascomycota	Phosphorylated carbohydrates phosphatase	UniRef90_B8M9U5 HAD superfamily hydrolase, putative n=6 Tax=Eurotiales TaxID=5042 RepID=B8M9U5_TALSN	No hit	0	0	1	No hit	0	0	0
AS_DN22132_c0_g1	OKL62344 cds supercontig:ASM190759v1:scaffold_2:2057676:2058778:-1 gene:UA08_02825 gene_biotype:protein_coding transcript_biotype:protein_coding description:14-3-3 protein-like protein	5e-64	81.6993	0	0	4.91688	Ascomycota	NA	UniRef90_A0A0D6R0M4 Uncharacterized protein n=1 Tax=Araucaria cunninghamii TaxID=56994 RepID=A0A0D6R0M4_ARACU	No hit	0	0	1	No hit	0	gnl|TC-DB|P48349|8.A.98.1.8 14-3-3-like protein GF14 lambda OS=Arabidopsis thaliana GN=GRF6 PE=1 SV=1	77.451
AS_DN30876_c0_g1	EED24333 cds supercontig:JCVI-TSTA1-3.0:scf_1105507295523:4755055:4757500:-1 gene:TSTA_076990 gene_biotype:protein_coding transcript_biotype:protein_coding description:60S ribosomal protein L1	1e-70	78.8779	0	0	4.84709	Ascomycota	NA	UniRef90_A0A0B1NYN1 Ribosomal protein n=11 Tax=leotiomyceta TaxID=716546 RepID=A0A0B1NYN1_UNCNE	No hit	0	0	1	No hit	0	0	0
AS_DN114444_c0_g1	KFX48951 cds supercontig:ASM75011v1:scf010:45004:47027:1 gene:GQ26_0100150 gene_biotype:protein_coding transcript_biotype:protein_coding description:Transcription initiation factor IIB	0	88.4393	0	0.0088727	4.718	Ascomycota	Transcription initiation factor TFIIB	UniRef90_B6Q1D2 Transcription initiation protein n=3 Tax=Eurotiales TaxID=5042 RepID=B6Q1D2_TALMQ	No hit	0	0.00506616	0.999987	No hit	0	0	0
AS_DN117523_c0_g1	KFX43796 cds supercontig:ASM75011v1:scf032:44699:47103:-1 gene:GQ26_0320190 gene_biotype:protein_coding transcript_biotype:protein_coding description:Alkaline protease 2	3e-126	91.2281	0	0	4.70059	Ascomycota	NA	UniRef90_B8MD40 Autophagic serine protease Alp2 n=5 Tax=Eurotiales TaxID=5042 RepID=B8MD40_TALSN	No hit	0	0	1	No hit	SP(Sec/SPI)	0	0
AS_DN32608_c0_g1	GAM33459 cds supercontig:TcelY94_1.0:DF933800.1:434422:437792:1 gene:TCE0_004f00361 gene_biotype:protein_coding transcript_biotype:protein_coding description:hypothetical protein	0	97.8218	0	0	4.64878	Ascomycota	NA	UniRef90_A0A2H3IM65 Uncharacterized protein n=2 Tax=Eurotiales TaxID=5042 RepID=A0A2H3IM65_9EURO	No hit	0	0	1	No hit	0	0	0
AS_DN5876_c0_g1	KFX51518 cds supercontig:ASM75011v1:scf005:835346:837127:-1 gene:GQ26_0052820 gene_biotype:protein_coding transcript_biotype:protein_coding description:Zinc finger protein ZPR1	0	90.2003	0	0.0114284	4.63753	Ascomycota	Essential protein with two zinc fingers (Eurofung)	UniRef90_B8MQ67 Zinc finger protein ZPR1 n=4 Tax=Eurotiales TaxID=5042 RepID=B8MQ67_TALSN	No hit	0	0.00657049	0.999978	No hit	0	0	0
AS_DN35035_c0_g1	EEA20081 cds supercontig:JCVI-PMFA1-2.0:scf_1105668340738:172297:176675:1 gene:PMAA_039460 gene_biotype:protein_coding transcript_biotype:protein_coding description:MATH and UCH domain protein, putative	0	84.4317	0	0	4.56588	Ascomycota	Meichroacidin	UniRef90_A0A2H3IIH3 Zinc finger, RING-type n=1 Tax=Penicillium occitanis TaxID=290292 RepID=A0A2H3IIH3_9EURO	No hit	0	0	1	No hit	0	0	0
AS_DN8126_c0_g1	CRG86922 cds supercontig:PIS:WF-38-12_scaffold00003:829594:831120:-1 gene:PISL3812_03935 gene_biotype:protein_coding transcript_biotype:protein_coding description:stearoyl-CoA desaturase(delta-9 desaturase)	3e-82	80.7018	0	0	4.52078	Ascomycota	Acyl-CoA desaturase	UniRef90_A0A1Y1ZGW4 Acyl-CoA desaturase n=1 Tax=Clohesyomyces aquaticus TaxID=1231657 RepID=A0A1Y1ZGW4_9PLEO	No hit	0	0	1	No hit	0	0	0
AS_DN136988_c0_g1	OKL64486 cds supercontig:ASM190759v1:scaffold_0:2463517:2464324:1 gene:UA08_00876 gene_biotype:protein_coding transcript_biotype:protein_coding description:hypothetical protein	1e-54	73	0	0	4.47297	Ascomycota	NA	UniRef90_A0A225BAR7 Uncharacterized protein n=1 Tax=Talaromyces atroroseus TaxID=1441469 RepID=A0A225BAR7_9EURO	No hit	0	0	1	No hit	0	0	0
AS_DN106067_c0_g1	EEA26319 cds supercontig:JCVI-PMFA1-2.0:scf_1105668340758:3360494:3361781:-1 gene:PMAA_073940 gene_biotype:protein_coding transcript_biotype:protein_coding description:40S ribosomal protein S5, putative	9e-141	96.0784	0	0	4.46905	Ascomycota	40S ribosomal protein S5	UniRef90_B8M2T9 40S ribosomal protein S5, putative n=5 Tax=Talaromyces TaxID=5094 RepID=B8M2T9_TALSN	No hit	0	0	1	No hit	0	0	0
AS_DN26465_c0_g1	KFX43254 cds supercontig:ASM75011v1:scf037:243503:245378:-1 gene:GQ26_0370920 gene_biotype:protein_coding transcript_biotype:protein_coding description:hypothetical protein	0	91.5074	0	0	4.28061	Ascomycota	Vegetative cell wall protein gp1, variant	UniRef90_B6Q870 Uncharacterized protein n=3 Tax=Eurotiales TaxID=5042 RepID=B6Q870_TALMQ	No hit	0	0	1	No hit	0	0	0
AS_DN108979_c0_g1	KFX45803 cds supercontig:ASM75011v1:scf021:53308:56009:1 gene:GQ26_0210200 gene_biotype:protein_coding transcript_biotype:protein_coding description:Heat shock protein SSB1	0	94.5693	0	0	4.27724	Ascomycota	NA	UniRef90_B8MHL8 Hsp70 chaperone (HscA), putative n=2 Tax=Eurotiomycetidae TaxID=451871 RepID=B8MHL8_TALSN	Hsp70	0	0	1	No hit	0	gnl|TC-DB|P10591|3.A.16.1.6 Heat shock protein SSA1 OS=Saccharomyces cerevisiae (strain ATCC 204508 / S288c) OX=559292 GN=SSA1 PE=1 SV=4	85.3933
AS_DN42258_c0_g1	GAM40368 cds supercontig:TcelY94_1.0:DF933834.1:789564:790364:1 gene:TCE0_038f12666 gene_biotype:protein_coding transcript_biotype:protein_coding description:hypothetical protein	0	97.1286	0	0	4.27302	Ascomycota	Reductase with broad range of substrate specificity	UniRef90_B8MAC8 Sorbitol/xylulose reductase Sou1-like, putative n=3 Tax=Eurotiales TaxID=5042 RepID=B8MAC8_TALSN	No hit	0	0	1	No hit	0	0	0
AS_DN106517_c0_g1	GAM33447 cds supercontig:TcelY94_1.0:DF933800.1:399146:401128:1 gene:TCE0_004f00345 gene_biotype:protein_coding transcript_biotype:protein_coding description:F1-ATPase beta subunit	0	99.5025	0	0.0366672	4.26741	Ascomycota	ATP synthase F1, beta subunit	UniRef90_B6QIQ4 ATP synthase subunit beta n=12 Tax=Eurotiomycetes TaxID=147545 RepID=B6QIQ4_TALMQ	No hit	0	0.0216681	0.999765	No hit	0	gnl|TC-DB|A1B8P0|3.A.2.1.7 ATP synthase subunit beta OS=Paracoccus denitrificans (strain Pd 1222) GN=atpD PE=3 SV=1	79.1045
AS_DN8910_c0_g1	EEA28722 cds supercontig:JCVI-PMFA1-2.0:scf_1105668340764:5397262:5400519:-1 gene:PMAA_035180 gene_biotype:protein_coding transcript_biotype:protein_coding description:translation elongation factor EF-2 subunit, putative	0	95.818	0	0	4.26429	Ascomycota	Elongation factor 2	UniRef90_B8MRQ2 Translation elongation factor EF-2 subunit, putative n=6 Tax=Eurotiales TaxID=5042 RepID=B8MRQ2_TALSN	No hit	0	0	1	No hit	0	0	0
AS_DN30309_c0_g1	OKL64404 cds supercontig:ASM190759v1:scaffold_0:3262227:3266886:1 gene:UA08_01129 gene_biotype:protein_coding transcript_biotype:protein_coding description:Heat shock protein hsp98	0	88.1579	0.0147965	0.031766	4.18344	Ascomycota	Heat-shock protein Hsp98	UniRef90_B8M1T0 Heat shock protein Hsp98/Hsp104/ClpA, putative n=5 Tax=Eurotiales TaxID=5042 RepID=B8M1T0_TALSN	Hsp100	0.0089244	0.0190007	0.99978	No hit	0	gnl|TC-DB|Q9SXJ7|3.A.9.1.2 Chaperone protein ClpC2, chloroplastic OS=Arabidopsis thaliana GN=CLPC2 PE=2 SV=1	73.6842
AS_DN127638_c0_g1	KFX43798 cds supercontig:ASM75011v1:scf032:56767:59397:1 gene:GQ26_0320220 gene_biotype:protein_coding transcript_biotype:protein_coding description:Transaldolase	0	93.2234	0	0	4.15027	Ascomycota	NA	UniRef90_J2DPY7 Uncharacterized protein n=1 Tax=Klebsiella pneumoniae subsp. pneumoniae DSM 30104 TaxID=1162296 RepID=J2DPY7_KLEPN	No hit	0	0	1	No hit	0	0	0
AS_DN87114_c0_g1	KFX43463 cds supercontig:ASM75011v1:scf035:151964:154272:-1 gene:GQ26_0350580 gene_biotype:protein_coding transcript_biotype:protein_coding description:hypothetical protein	0	77.2093	0.0068253	0	4.10888	Ascomycota	Period circadian protein (Fragment)	UniRef90_A0A2H3IJ22 Uncharacterized protein n=1 Tax=Penicillium occitanis TaxID=290292 RepID=A0A2H3IJ22_9EURO	No hit	0.00417053	0	0.999991	No hit	0	0	0
AS_DN21121_c0_g1	KFX46456 cds supercontig:ASM75011v1:scf019:455496:458496:-1 gene:GQ26_0191780 gene_biotype:protein_coding transcript_biotype:protein_coding description:Heat shock protein hsp98	5e-131	82.5312	0	0	4.06684	Ascomycota	NA	UniRef90_A0A225B120 Heat shock protein hsp98 n=1 Tax=Talaromyces atroroseus TaxID=1441469 RepID=A0A225B120_9EURO	Hsp100	0	0	1	No hit	0	0	0
AS_DN49625_c1_g1	CRG92487 cds supercontig:PIS:WF-38-12_scaffold00013:102085:103041:1 gene:PISL3812_09548 gene_biotype:protein_coding transcript_biotype:protein_coding description:TATA-box-binding protein	4e-75	79.3388	0	0	4.06293	Ascomycota	TBP-domain-containing protein	UniRef90_E4ZSJ9 Similar to transcription initiation factor TFIID n=17 Tax=Pleosporales TaxID=92860 RepID=E4ZSJ9_LEPMJ	No hit	0	0	1	No hit	0	0	0
AS_DN49186_c0_g2	KFX43799 cds supercontig:ASM75011v1:scf032:59540:60482:1 gene:GQ26_0320230 gene_biotype:protein_coding transcript_biotype:protein_coding description:Superoxide dismutase [Cu-Zn]	0	93.7634	0	0.0215701	4.04243	Ascomycota	Superoxide dismutase	UniRef90_A0A0F7TUZ3 Superoxide dismutase [Cu-Zn] n=1 Tax=Penicillium brasilianum TaxID=104259 RepID=A0A0F7TUZ3_9EURO	No hit	0	0.0131894	0.999913	No hit	0	0	0
AS_DN7796_c0_g1	EEA27497 cds supercontig:JCVI-PMFA1-2.0:scf_1105668340764:2278668:2281055:1 gene:PMAA_023720 gene_biotype:protein_coding transcript_biotype:protein_coding description:zinc knuckle transcription factor/splicing factor MSL5/ZFM1, putative	0	91.7132	0	0	4.04019	Ascomycota	Zinc knuckle transcription factor/splicing factor MSL5/ZFM1	UniRef90_A0A2H3J197 Zinc finger, CCHC-type n=1 Tax=Penicillium occitanis TaxID=290292 RepID=A0A2H3J197_9EURO	No hit	0	0	1	No hit	0	0	0
AS_DN7133_c0_g1	OKL61924 cds supercontig:ASM190759v1:scaffold_2:1359295:1361785:-1 gene:UA08_02608 gene_biotype:protein_coding transcript_biotype:protein_coding description:hypothetical protein	2e-97	86.0606	0	0	4.03626	Ascomycota	NA	UniRef90_B8MC48 Actin cytoskeleton protein (VIP1), putative n=1 Tax=Talaromyces stipitatus (strain ATCC 10500 / CBS 375.48/ QM 6759 / NRRL 1006) TaxID=441959 RepID=B8MC48_TALSN	No hit	0	0	1	No hit	0	0	0
AS_DN127586_c0_g1	CRG90707 cds supercontig:PIS:WF-38-12_scaffold00008:922371:926185:1 gene:PISL3812_07752 gene_biotype:protein_coding transcript_biotype:protein_coding description:6-phosphogluconate dehydrogenase	6e-155	79.5414	0	0	4.03059	Ascomycota	NA	UniRef90_R7YPD3 6-phosphogluconate dehydrogenase, decarboxylating n=2 Tax=Fungi TaxID=4751 RepID=R7YPD3_CONA1	No hit	0	0	1	No hit	0	0	0
AS_DN33354_c0_g1	EEA24010 cds supercontig:JCVI-PMFA1-2.0:scf_1105668340960:972082:973695:-1 gene:PMAA_080290 gene_biotype:protein_coding transcript_biotype:protein_coding description:metal homeostatis protein bsd2	0	88.3613	0.00743517	0	4.01943	Ascomycota	Metal homeostatis protein bsd2	UniRef90_B6QES3 Metal homeostatis protein bsd2 n=2 Tax=Talaromyces marneffei (strain ATCC 18224 / CBS 334.59 / QM 7333) TaxID=441960 RepID=B6QES3_TALMQ	No hit	0.00459152	0	0.999989	No hit	0	0	0
AS_DN34761_c0_g1	KFX52318 cds supercontig:ASM75011v1:scf003:618413:620921:1 gene:GQ26_0032170 gene_biotype:protein_coding transcript_biotype:protein_coding description:Protein fmp52-2, mitochondrial	0	89.4203	0	0	3.9979	Ascomycota	NAD dependent epimerase/dehydratase	UniRef90_A0A093Y487 Protein fmp52-2, mitochondrial n=3 Tax=Eurotiales TaxID=5042 RepID=A0A093Y487_TALMA	No hit	0	0	1	No hit	0	0	0
AS_DN20988_c0_g1	GAM43354 cds supercontig:TcelY94_1.0:DF933843.1:759636:761153:1 gene:TCE0_047f18094 gene_biotype:protein_coding transcript_biotype:protein_coding description:hypothetical protein	2e-162	95.5357	0	0.0580095	3.9841	Ascomycota	Ribosomal protein L7 (Fragment)	UniRef90_A0A0B8MYR7 Uncharacterized protein n=3 Tax=Eurotiales TaxID=5042 RepID=A0A0B8MYR7_9EURO	No hit	0	0.0350845	0.999384	No hit	0	0	0
AS_DN40658_c0_g1	EEA25227 cds supercontig:JCVI-PMFA1-2.0:scf_1105668340758:470729:472163:-1 gene:PMAA_063460 gene_biotype:protein_coding transcript_biotype:protein_coding description:GTP-binding nuclear protein Ran, putative	0	96.124	0	0	3.84381	Ascomycota	GTP-binding nuclear protein GSP1/Ran	UniRef90_A0A0F4GRP3 GTP-binding nuclear protein n=6 Tax=Zymoseptoria TaxID=1047167 RepID=A0A0F4GRP3_9PEZI	No hit	0	0	1	No hit	0	gnl|TC-DB|P32835|9.A.50.1.1 GTP-binding nuclear protein GSP1/CNR1 OS=Saccharomyces cerevisiae GN=GSP1 PE=1 SV=1	91.1628
AS_DN26112_c0_g1	KFX42354 cds supercontig:ASM75011v1:scf045:35044:36625:-1 gene:GQ26_0450110 gene_biotype:protein_coding transcript_biotype:protein_coding description:hypothetical protein	5e-154	91.7949	0	0	3.81301	Ascomycota	O-sialoglycoprotein endopeptidase	UniRef90_B8MFK5 Uncharacterized protein n=4 Tax=Eurotiales TaxID=5042 RepID=B8MFK5_TALSN	No hit	0	0	1	No hit	0	0	0
AS_DN34918_c0_g1	OKL63695 cds supercontig:ASM190759v1:scaffold_0:2025090:2026416:-1 gene:UA08_00717 gene_biotype:protein_coding transcript_biotype:protein_coding description:Transaldolase	1e-118	78.6787	0	0	3.80614	Ascomycota	Transaldolase	UniRef90_A0A1Y1Z1N0 Transaldolase n=1 Tax=Clohesyomyces aquaticus TaxID=1231657 RepID=A0A1Y1Z1N0_9PLEO	No hit	0	0	1	No hit	0	0	0
AS_DN28169_c0_g1	KFX44407 cds supercontig:ASM75011v1:scf028:28138:29425:-1 gene:GQ26_0280120 gene_biotype:protein_coding transcript_biotype:protein_coding description:E3 ubiquitin ligase complex SCF subunit sconC	2e-178	88.6128	0	0	3.80224	Ascomycota	Sulfur metabolite repression control protein C	UniRef90_B6QGB9 E3 ubiquitin ligase complex SCF subunit sconC n=2 Tax=Talaromyces marneffei TaxID=37727 RepID=SKP1_TALMQ	No hit	0	0	1	No hit	0	0	0
AS_DN10724_c0_g1	KFX50910 cds supercontig:ASM75011v1:scf006:505199:507258:-1 gene:GQ26_0061870 gene_biotype:protein_coding transcript_biotype:protein_coding description:Protein AHC1	0	85.8586	0	0	3.78262	Ascomycota	NA	UniRef90_B6Q6X2 Uncharacterized protein n=3 Tax=Eurotiales TaxID=5042 RepID=B6Q6X2_TALMQ	No hit	0	0	1	No hit	0	0	0
AS_DN10326_c0_g1	GAM33322 cds supercontig:TcelY94_1.0:DF933800.1:15849:19000:1 gene:TCE0_004f00139 gene_biotype:protein_coding transcript_biotype:protein_coding description:hypothetical protein	0	93.8053	0	0	3.77556	Ascomycota	NA	UniRef90_A0A2H3I7D5 Uncharacterized protein n=3 Tax=Eurotiales TaxID=5042 RepID=A0A2H3I7D5_9EURO	No hit	0	0	1	No hit	0	0	0
AS_DN32197_c0_g1	EEA28847 cds supercontig:JCVI-PMFA1-2.0:scf_1105668340764:5736029:5736699:-1 gene:PMAA_036400 gene_biotype:protein_coding transcript_biotype:protein_coding description:conserved hypothetical protein	0	89.8413	0.0109243	0	3.74023	Ascomycota	NA	UniRef90_B8MQ52 Uncharacterized protein n=4 Tax=Eurotiales TaxID=5042 RepID=B8MQ52_TALSN	No hit	0.00698213	0	0.999976	No hit	0	0	0
AS_DN34774_c0_g1	KFX51482 cds supercontig:ASM75011v1:scf005:784184:786633:-1 gene:GQ26_0052580 gene_biotype:protein_coding transcript_biotype:protein_coding description:Pre-mRNA polyadenylation factor fip1	6e-139	75.5051	0	0	3.71136	Ascomycota	Heat shock protein, mitochondrial	UniRef90_A0A093VH52 10 kDa heat shock protein, mitochondrial (Fragment) n=1 Tax=Talaromyces marneffei PM1 TaxID=1077442 RepID=A0A093VH52_TALMA	No hit	0	0	1	No hit	0	0	0
AS_DN456_c0_g1	CRG86092 cds supercontig:PIS:WF-38-12_scaffold00002:3631751:3633044:1 gene:PISL3812_03095 gene_biotype:protein_coding transcript_biotype:protein_coding description:fructose-bisphosphate aldolase, class II	6e-99	82.716	0	0	3.67687	Ascomycota	Fructose-bisphosphate aldolase	UniRef90_B8M548 Fructose-bisphosphate aldolase, class II n=4 Tax=Eurotiales TaxID=5042 RepID=B8M548_TALSN	No hit	0	0	1	No hit	0	0	0
AS_DN103532_c0_g1	KFX45742 cds supercontig:ASM75011v1:scf022:393985:395919:1 gene:GQ26_0221290 gene_biotype:protein_coding transcript_biotype:protein_coding description:Single-stranded TG1-3 DNA-binding protein	1e-140	92.9825	0	0	3.65717	Ascomycota	Nucleotide-binding, alpha-beta plait	UniRef90_A0A093UZM4 Single-stranded TG1-3 DNA-binding protein n=5 Tax=Eurotiales TaxID=5042 RepID=A0A093UZM4_TALMA	No hit	0	0	1	No hit	0	0	0
AS_DN88188_c0_g1	GAM42021 cds supercontig:TcelY94_1.0:DF933839.1:262488:263163:1 gene:TCE0_043f15620 gene_biotype:protein_coding transcript_biotype:protein_coding description:glutathione peroxidase	0	83.7246	0	0	3.64524	Ascomycota	Glutathione peroxidase	UniRef90_B6QTZ7 Glutathione peroxidase n=4 Tax=Eurotiales TaxID=5042 RepID=B6QTZ7_TALMQ	No hit	0	0	1	No hit	0	0	0
AS_DN1206_c0_g1	KFX43030 cds supercontig:ASM75011v1:scf038:36022:38191:-1 gene:GQ26_0380120 gene_biotype:protein_coding transcript_biotype:protein_coding description:Mitochondrial protein import protein mas5	0	94.2417	0	0	3.6301	Ascomycota	Chaperone protein dnaJ	UniRef90_B8MH32 Protein mitochondrial targeting protein (Mas1), putative n=6 Tax=Eurotiales TaxID=5042 RepID=B8MH32_TALSN	DnaJ	0	0	1	No hit	0	0	0
AS_DN53419_c1_g1	KFX53237 cds supercontig:ASM75011v1:scf001:267933:270428:-1 gene:GQ26_0010960 gene_biotype:protein_coding transcript_biotype:protein_coding description:78 kDa glucose-regulated protein like	0	93.4251	0	0	3.62567	Ascomycota	NA	UniRef90_A0A232M762 Uncharacterized protein n=1 Tax=Elaphomyces granulatus TaxID=519963 RepID=A0A232M762_9EURO	Hsp70	0	0	1	No hit	0	gnl|TC-DB|P11021|1.A.33.1.5 78 kDa glucose-regulated protein OS=Homo sapiens GN=HSPA5 PE=1 SV=2	89.4495
AS_DN628_c0_g1	CRG91429 cds supercontig:PIS:WF-38-12_scaffold00009:1510225:1512496:-1 gene:PISL3812_08477 gene_biotype:protein_coding transcript_biotype:protein_coding description:Heat shock 70 kDa protein	2e-160	75.7848	0	0	3.59289	Ascomycota	NA	UniRef90_Q0U3T1 Uncharacterized protein n=19 Tax=Dothideomycetes TaxID=147541 RepID=Q0U3T1_PHANO	Hsp70	0	0	1	No hit	0	0	0
AS_DN35895_c0_g1	KFX44892 cds supercontig:ASM75011v1:scf025:33002:41695:-1 gene:GQ26_0250110 gene_biotype:protein_coding transcript_biotype:protein_coding description:Zinc finger protein rsv2	0	87.0317	0	0	3.59097	Ascomycota	Transcriptional regulator RPN4	UniRef90_B8M0U3 C2H2 transcription factor (Rpn4), putative n=1 Tax=Talaromyces stipitatus (strain ATCC 10500 / CBS 375.48/ QM 6759 / NRRL 1006) TaxID=441959 RepID=B8M0U3_TALSN	No hit	0	0	1	No hit	0	0	0
AS_DN5529_c0_g1	KFX43583 cds supercontig:ASM75011v1:scf034:126798:128389:-1 gene:GQ26_0340470 gene_biotype:protein_coding transcript_biotype:protein_coding description:60S ribosomal protein L15	7e-144	84.4055	0	0	3.58725	Ascomycota	Ribosomal protein L15	UniRef90_A0A0D2CGL0 Ribosomal protein L15 n=1 Tax=Cladophialophora immunda TaxID=569365 RepID=A0A0D2CGL0_9EURO	No hit	0	0	1	No hit	0	0	0
AS_DN43430_c0_g1	KFX46188 cds supercontig:ASM75011v1:scf020:397429:400626:1 gene:GQ26_0201420 gene_biotype:protein_coding transcript_biotype:protein_coding description:G1/S-specific cyclin pas1	0	88.8614	0.00679777	0	3.58425	Ascomycota	Cyclin	UniRef90_A0A2H3IUL0 Uncharacterized protein n=1 Tax=Penicillium occitanis TaxID=290292 RepID=A0A2H3IUL0_9EURO	No hit	0.00444935	0	0.99999	No hit	0	0	0
AS_DN126957_c0_g1	EED13496 cds supercontig:JCVI-TSTA1-3.0:scf_1105507295511:68458:69380:-1 gene:TSTA_097520 gene_biotype:protein_coding transcript_biotype:protein_coding description:conserved hypothetical protein	0	82.2222	0	0	3.56974	Ascomycota	Protein-S-isoprenylcysteine O-methyltransferase	UniRef90_A0A2I1BUN6 Uncharacterized protein n=1 Tax=Aspergillus novofumigatus IBT 16806 TaxID=1392255 RepID=A0A2I1BUN6_9EURO	No hit	0	0	1	No hit	0	0	0
AS_DN16726_c0_g1	EEA26510 cds supercontig:JCVI-PMFA1-2.0:scf_1105668340758:3894565:3895260:-1 gene:PMAA_075780 gene_biotype:protein_coding transcript_biotype:protein_coding description:conserved hypothetical protein	0	78.5285	0	0	3.56447	Ascomycota	NA	UniRef90_A0A2H3IW14 Uncharacterized protein n=1 Tax=Penicillium occitanis TaxID=290292 RepID=A0A2H3IW14_9EURO	No hit	0	0	1	No hit	0	0	0
AS_DN88166_c0_g1	KFX41282 cds supercontig:ASM75011v1:scf064:19217:24542:1 gene:GQ26_0640090 gene_biotype:protein_coding transcript_biotype:protein_coding description:Nitrite reductase [NAD(P)H]	0	88.781	0	0	3.5535	Ascomycota	NA	UniRef90_A0A093ULW7 Nitrite reductase [NAD(P)H] n=1 Tax=Talaromyces marneffei PM1 TaxID=1077442 RepID=A0A093ULW7_TALMA	No hit	0	0	1	No hit	0	0	0
AS_DN10586_c0_g1	KFX48070 cds supercontig:ASM75011v1:scf013:374625:377056:-1 gene:GQ26_0131430 gene_biotype:protein_coding transcript_biotype:protein_coding description:Zinc finger protein	0	95.1754	0	0	3.54203	Ascomycota	NA	UniRef90_B8M8T1 C2H2 transcription factor RfeC n=4 Tax=Eurotiales TaxID=5042 RepID=B8M8T1_TALSN	No hit	0	0	1	No hit	0	0	0
AS_DN56192_c4_g1	OKL58285 cds supercontig:ASM190759v1:scaffold_9:1040305:1041929:1 gene:UA08_06747 gene_biotype:protein_coding transcript_biotype:protein_coding description:ATP-dependent RNA helicase eIF4A	5e-94	85.3801	0	0	3.53971	Ascomycota	ATP-dependent RNA helicase eIF4A (Fragment)	UniRef90_A0A172C9Z4 ATP-dependent RNA helicase eIF4A (Fragment) n=1 Tax=Eurya emarginata TaxID=86844 RepID=A0A172C9Z4_9ERIC	No hit	0	0	1	No hit	0	gnl|TC-DB|P38919|3.A.18.1.1 Eukaryotic initiation factor 4A-III - Homo sapiens (Human).	82.4561
AS_DN39816_c0_g1	GAM43443 cds supercontig:TcelY94_1.0:DF933846.1:205308:206100:-1 gene:TCE0_050r18265 gene_biotype:protein_coding transcript_biotype:protein_coding description:hypothetical protein	0	85.9903	0	0	3.5356	Ascomycota	NA	UniRef90_A0A0B8N7C1 Uncharacterized protein n=2 Tax=Eurotiales TaxID=5042 RepID=A0A0B8N7C1_9EURO	No hit	0	0	1	No hit	0	0	0
AS_DN8486_c0_g1	KFX48368 cds supercontig:ASM75011v1:scf012:251462:253558:1 gene:GQ26_0120900 gene_biotype:protein_coding transcript_biotype:protein_coding description:Glyceraldehyde-3-phosphate dehydrogenase	0	94.332	0	0	3.53441	Ascomycota	Glyceraldehyde 3-phosphate dehydrogenase (Fragment)	UniRef90_A0A1L8E9Y9 Putative secreted protein n=1 Tax=Haematobia irritans TaxID=7368 RepID=A0A1L8E9Y9_HAEIR	No hit	0	0	1	No hit	0	0	0
AS_DN35496_c0_g1	CRG86092 cds supercontig:PIS:WF-38-12_scaffold00002:3631751:3633044:1 gene:PISL3812_03095 gene_biotype:protein_coding transcript_biotype:protein_coding description:fructose-bisphosphate aldolase, class II	1e-148	77.6042	0	0	3.51753	Ascomycota	Fructose-bisphosphate aldolase	UniRef90_A0A132B6F3 Putative fructose-bisphosphate aldolase 1 n=4 Tax=Leotiomycetes TaxID=147548 RepID=A0A132B6F3_9HELO	No hit	0	0	1	No hit	0	0	0
AS_DN72988_c0_g1	KFX52894 cds supercontig:ASM75011v1:scf002:804630:807492:1 gene:GQ26_0022850 gene_biotype:protein_coding transcript_biotype:protein_coding description:putative fumarate reductase	0	88.582	0	0	3.51017	Ascomycota	NA	UniRef90_B8MQI5 Fumarate reductase Osm1, putative n=4 Tax=Eurotiales TaxID=5042 RepID=B8MQI5_TALSN	No hit	0	0	1	No hit	0	0	0
AS_DN12140_c0_g1	GAM40208 cds supercontig:TcelY94_1.0:DF933834.1:227722:229970:1 gene:TCE0_038f12371 gene_biotype:protein_coding transcript_biotype:protein_coding description:mitochondrial matrix ATPase subunit	0	96.7192	0	0	3.49699	Ascomycota	Heat shock protein 70kDa (Fragment)	UniRef90_B8MC54 Mitochondrial Hsp70 chaperone (Ssc70), putative n=11 Tax=Eurotiales TaxID=5042 RepID=B8MC54_TALSN	Hsp70	0	0	1	No hit	0	gnl|TC-DB|P0A6Y8|1.A.33.1.2 Chaperone protein dnaK - Escherichia coli.	81.4961
AS_DN24884_c0_g1	KFX52101 cds supercontig:ASM75011v1:scf003:157318:157937:1 gene:GQ26_0030620 gene_biotype:protein_coding transcript_biotype:protein_coding description:hypothetical protein	2e-135	71.0728	0	0	3.49028	Ascomycota	NA	UniRef90_A0A2H3IRT5 Uncharacterized protein n=1 Tax=Penicillium occitanis TaxID=290292 RepID=A0A2H3IRT5_9EURO	No hit	0	0	1	No hit	0	0	0
AS_DN94668_c0_g1	KFX43464 cds supercontig:ASM75011v1:scf035:155089:157932:1 gene:GQ26_0350590 gene_biotype:protein_coding transcript_biotype:protein_coding description:E3 ubiquitin-protein ligase RNF13	4e-101	74.0196	0	0	3.48021	Ascomycota	NA	UniRef90_A0A2H3IU98 Zinc finger, RING-type n=1 Tax=Penicillium occitanis TaxID=290292 RepID=A0A2H3IU98_9EURO	No hit	0	0	1	No hit	0	0	0
AS_DN35449_c0_g1	KFX42246 cds supercontig:ASM75011v1:scf047:134433:137295:1 gene:GQ26_0470500 gene_biotype:protein_coding transcript_biotype:protein_coding description:Citrate synthase, mitochondrial	0	96.6921	0	0	3.45795	Ascomycota	Citrate synthase	UniRef90_A0A0U1LTK4 Citrate synthase n=21 Tax=Eurotiomycetidae TaxID=451871 RepID=A0A0U1LTK4_TALIS	No hit	0	0	1	No hit	0	0	0
AS_DN9940_c0_g1	KFX50784 cds supercontig:ASM75011v1:scf006:252048:253743:1 gene:GQ26_0060910 gene_biotype:protein_coding transcript_biotype:protein_coding description:hypothetical protein	0	81.6804	0	0	3.44046	Ascomycota	NA	UniRef90_A0A2H3ILV4 Uncharacterized protein n=1 Tax=Penicillium occitanis TaxID=290292 RepID=A0A2H3ILV4_9EURO	No hit	0	0	1	No hit	0	0	0
AS_DN76760_c0_g1	OKL59150 cds supercontig:ASM190759v1:scaffold_7:937800:938521:-1 gene:UA08_05796 gene_biotype:protein_coding transcript_biotype:protein_coding description:hypothetical protein	2e-103	82.2404	0	0	3.43317	Ascomycota	DDHD domain-containing protein	UniRef90_A0A225AF04 Uncharacterized protein n=1 Tax=Talaromyces atroroseus TaxID=1441469 RepID=A0A225AF04_9EURO	No hit	0	0	1	No hit	0	0	0
AS_DN37213_c0_g1	CRG83199 cds supercontig:PIS:WF-38-12_scaffold00001:1861906:1863876:-1 gene:PISL3812_00549 gene_biotype:protein_coding transcript_biotype:protein_coding description:Heat shock 70 kDa protein	8e-67	81.877	0	0	3.40078	Ascomycota	NA	UniRef90_A5HVI6 Heat shock protein 70 (Fragment) n=1 Tax=Paracoccidioides brasiliensis TaxID=121759 RepID=A5HVI6_PARBR	Hsp70	0	0	1	No hit	0	gnl|TC-DB|P10591|3.A.16.1.6 Heat shock protein SSA1 OS=Saccharomyces cerevisiae (strain ATCC 204508 / S288c) OX=559292 GN=SSA1 PE=1 SV=4	97.0874
AS_DN36465_c0_g1	EED19936 cds supercontig:JCVI-TSTA1-3.0:scf_1105507295541:2350516:2351941:1 gene:TSTA_031950 gene_biotype:protein_coding transcript_biotype:protein_coding description:cell wall protein,putative	8e-148	85.7143	0	0	3.39997	Ascomycota	NA	UniRef90_A0A2H3IV70 Mid2-like cell wall stress sensor n=1 Tax=Penicillium occitanis TaxID=290292 RepID=A0A2H3IV70_9EURO	No hit	0	0	1	No hit	0	0	0
AS_DN11290_c0_g1	CRG86922 cds supercontig:PIS:WF-38-12_scaffold00003:829594:831120:-1 gene:PISL3812_03935 gene_biotype:protein_coding transcript_biotype:protein_coding description:stearoyl-CoA desaturase(delta-9 desaturase)	5e-75	79.4667	0	0	3.39518	Ascomycota	NA	UniRef90_A0A150UU23 Acyl-CoA desaturase n=1 Tax=Acidomyces richmondensis BFW TaxID=766039 RepID=A0A150UU23_9PEZI	No hit	0	0	1	No hit	0	0	0
AS_DN70355_c0_g1	KFX43802 cds supercontig:ASM75011v1:scf032:66329:67549:-1 gene:GQ26_0320260 gene_biotype:protein_coding transcript_biotype:protein_coding description:Ubiquitin-conjugating enzyme E2-34 kDa	2e-94	84.4086	0	0	3.39349	Ascomycota	Putative Ubiquitin-conjugating enzyme E2-34 kDa	UniRef90_B8MD47 Ubiquitin conjugating enzyme (UbcC), putative n=1 Tax=Talaromyces stipitatus (strain ATCC 10500 / CBS 375.48/ QM 6759 / NRRL 1006) TaxID=441959 RepID=B8MD47_TALSN	No hit	0	0	1	No hit	SP(Sec/SPI)	0	0
AS_DN136740_c0_g1	KFX53216 cds supercontig:ASM75011v1:scf001:220921:223138:1 gene:GQ26_0010790 gene_biotype:protein_coding transcript_biotype:protein_coding description:Uncharacterized protein	1e-65	83.5017	0	0	3.37779	Ascomycota	NA	UniRef90_B6Q4E3 Stromal membrane-associated protein n=3 Tax=Eurotiales TaxID=5042 RepID=B6Q4E3_TALMQ	No hit	0	0	1	No hit	0	0	0
AS_DN21485_c0_g1	KFX47483 cds supercontig:ASM75011v1:scf015:580671:582733:-1 gene:GQ26_0151920 gene_biotype:protein_coding transcript_biotype:protein_coding description:Heat shock protein sti1 like	0	90.3226	0	0	3.37719	Ascomycota	Heat shock chaperonin-binding	UniRef90_B8M1B1 Heat shock protein (Sti1), putative n=3 Tax=Talaromyces TaxID=5094 RepID=B8M1B1_TALSN	No hit	0	0	1	No hit	0	0	0
AS_DN127741_c0_g1	EEA24041 cds supercontig:JCVI-PMFA1-2.0:scf_1105668340960:1061962:1063439:1 gene:PMAA_080590 gene_biotype:protein_coding transcript_biotype:protein_coding description:aspartic endopeptidase(AP1), putative	3e-145	73.1732	0	0	3.37018	Ascomycota	Aspartic endopeptidase	UniRef90_A0A225BAS2 Uncharacterized protein n=1 Tax=Talaromyces atroroseus TaxID=1441469 RepID=A0A225BAS2_9EURO	No hit	0	0	1	No hit	0	0	0
AS_DN19668_c0_g1	OKL56706 cds supercontig:ASM190759v1:scaffold_12:437899:440195:-1 gene:UA08_07845 gene_biotype:protein_coding transcript_biotype:protein_coding description:Heat shock protein SSB1	2e-135	81.3675	0	0	3.33329	Ascomycota	Heat shock protein SSB	UniRef90_G2WTH8 Heat shock protein sks2 n=7 Tax=Verticillium TaxID=1036719 RepID=G2WTH8_VERDV	Hsp70	0	0	1	No hit	0	0	0
AS_DN68053_c0_g1	GAM40155 cds supercontig:TcelY94_1.0:DF933834.1:48159:48913:-1 gene:TCE0_038r12279 gene_biotype:protein_coding transcript_biotype:protein_coding description:60S ribosomal protein	8e-127	72.9167	0	0	3.32638	Ascomycota	NA	UniRef90_B8MBZ2 60S ribosomal protein L23 n=6 Tax=Eurotiales TaxID=5042 RepID=B8MBZ2_TALSN	No hit	0	0	1	No hit	0	0	0
AS_DN67015_c0_g1	OKL61030 cds supercontig:ASM190759v1:scaffold_3:2329727:2331027:-1 gene:UA08_03836 gene_biotype:protein_coding transcript_biotype:protein_coding description:hypothetical protein	1e-145	90.5128	0	0	3.31935	Ascomycota	NA	No hits	No hit	0	0	1	No hit	0	0	0
AS_DN110261_c0_g1	KFX49401 cds supercontig:ASM75011v1:scf009:212394:213706:-1 gene:GQ26_0090650 gene_biotype:protein_coding transcript_biotype:protein_coding description:Histone H1	2e-103	86.7987	0	0	3.3112	Ascomycota	Histone	UniRef90_A0A2H3IBG3 Winged helix-turn-helix transcription repressor DNA-binding n=1 Tax=Penicillium occitanis TaxID=290292 RepID=A0A2H3IBG3_9EURO	No hit	0	0	1	No hit	0	0	0
AS_DN7310_c0_g1	EED22081 cds supercontig:JCVI-TSTA1-3.0:scf_1105507295527:3530886:3531832:-1 gene:TSTA_093270 gene_biotype:protein_coding transcript_biotype:protein_coding description:conserved hypothetical protein	6e-146	82.243	0	0	3.30135	Ascomycota	Long chain base Stimulates Phosphorylation	UniRef90_A0A2H3IBS8 Uncharacterized protein n=1 Tax=Penicillium occitanis TaxID=290292 RepID=A0A2H3IBS8_9EURO	No hit	0	0	1	No hit	0	0	0
AS_DN88222_c0_g1	CRG89017 cds supercontig:PIS:WF-38-12_scaffold00005:1630588:1631848:-1 gene:PISL3812_06052 gene_biotype:protein_coding transcript_biotype:protein_coding description:malate dehydrogenase	4e-112	78.6802	0	0	3.28937	Ascomycota	Malate dehydrogenase, mitochondrial	UniRef90_E5A6D2 Malate dehydrogenase n=5 Tax=Pleosporales TaxID=92860 RepID=E5A6D2_LEPMJ	No hit	0	0	1	No hit	0	0	0
AS_DN102373_c0_g1	KFX49201 cds supercontig:ASM75011v1:scf010:600776:601333:-1 gene:GQ26_0102080 gene_biotype:protein_coding transcript_biotype:protein_coding description:Non-histone chromosomal protein 6	2e-127	92.9487	0	0	3.26409	Ascomycota	Non-histone chromosomal protein 6	UniRef90_B6Q329 Nucleosome binding protein (Nhp6a), putative n=3 Tax=Talaromyces marneffei TaxID=37727 RepID=B6Q329_TALMQ	No hit	0	0	1	No hit	0	0	0
AS_DN70380_c0_g1	OKL57081 cds supercontig:ASM190759v1:scaffold_11:1119554:1121343:-1 gene:UA08_07673 gene_biotype:protein_coding transcript_biotype:protein_coding description:Tubulin alpha-1 chain	1e-65	81.1881	0	0	3.24996	Ascomycota	NA	UniRef90_T1DPG7 Putative secreted protein n=1 Tax=Anopheles aquasalis TaxID=42839 RepID=T1DPG7_ANOAQ	No hit	0	0	1	No hit	0	0	0
AS_DN101488_c0_g1	KFX53529 cds supercontig:ASM75011v1:scf001:886227:887459:1 gene:GQ26_0013080 gene_biotype:protein_coding transcript_biotype:protein_coding description:Protein UPS2, mitochondrial	0	90.925	0	0	3.24908	Ascomycota	Mitochondrial protein sorting	UniRef90_B6Q2P8 Mitochondrial protein sorting (Msf1), putative n=4 Tax=Eurotiales TaxID=5042 RepID=B6Q2P8_TALMQ	No hit	0	0	1	No hit	0	0	0
AS_DN40565_c0_g1	EEA27053 cds supercontig:JCVI-PMFA1-2.0:scf_1105668340764:1147515:1149639:-1 gene:PMAA_019540 gene_biotype:protein_coding transcript_biotype:protein_coding description:conserved hypothetical protein	0	88.4488	0	0	3.2217	Ascomycota	NA	UniRef90_A0A2H3IYC8 Uncharacterized protein n=1 Tax=Penicillium occitanis TaxID=290292 RepID=A0A2H3IYC8_9EURO	No hit	0	0	1	No hit	0	0	0
AS_DN44873_c0_g1	KFX46759 cds supercontig:ASM75011v1:scf017:107641:110099:-1 gene:GQ26_0170430 gene_biotype:protein_coding transcript_biotype:protein_coding description:60S ribosomal protein L8-B	0	85.6322	0	0	3.20572	Ascomycota	Cytosolic large ribosomal subunit protein L7A	UniRef90_A0A0D1YF36 60S ribosomal protein L8-B n=1 Tax=Verruconis gallopava TaxID=253628 RepID=A0A0D1YF36_9PEZI	No hit	0	0	1	No hit	0	0	0
AS_DN81074_c0_g1	KFX42882 cds supercontig:ASM75011v1:scf040:157543:159341:1 gene:GQ26_0400570 gene_biotype:protein_coding transcript_biotype:protein_coding description:60S ribosomal protein L3	0	95.7494	0	0.145005	3.19391	Ascomycota	NA	UniRef90_B8MIZ6 60S ribosomal protein L3 n=4 Tax=Eurotiales TaxID=5042 RepID=B8MIZ6_TALSN	No hit	0	0.0940331	0.995569	No hit	0	0	0
AS_DN648_c0_g1	EEA20600 cds supercontig:JCVI-PMFA1-2.0:scf_1105668340738:1499580:1501270:1 gene:PMAA_044330 gene_biotype:protein_coding transcript_biotype:protein_coding description:conserved hypothetical protein	0	88.749	0	0	3.18577	Ascomycota	Casein kinase II beta 2 subunit	UniRef90_B6QRX6 Uncharacterized protein n=2 Tax=Eurotiales TaxID=5042 RepID=B6QRX6_TALMQ	No hit	0	0	1	No hit	0	0	0
AS_DN34227_c0_g1	EEA20300 cds supercontig:JCVI-PMFA1-2.0:scf_1105668340738:717019:720084:1 gene:PMAA_041490 gene_biotype:protein_coding transcript_biotype:protein_coding description:intermembrane space AAA protease IAP-1	0	89.2052	0	0	3.18162	Ascomycota	NA	UniRef90_A0A2H3IST9 Peptidase M41 n=1 Tax=Penicillium occitanis TaxID=290292 RepID=A0A2H3IST9_9EURO	No hit	0	0	1	No hit	0	0	0
AS_DN4115_c0_g1	GAM40150 cds supercontig:TcelY94_1.0:DF933834.1:35834:36841:1 gene:TCE0_038f12270 gene_biotype:protein_coding transcript_biotype:protein_coding description:ribosomal protein 10 of the small 40S subunit	0	92.6882	0.0165103	0	3.15803	Ascomycota	40S ribosomal protein S1	UniRef90_A0A0F4YUF0 40S ribosomal protein S1 n=1 Tax=Rasamsonia emersonii CBS 393.64 TaxID=1408163 RepID=A0A0F4YUF0_TALEM	No hit	0.0114905	0	0.999934	No hit	0	0	0
AS_DN34348_c0_g1	EEA24215 cds supercontig:JCVI-PMFA1-2.0:scf_1105668340960:1525280:1526346:-1 gene:PMAA_082210 gene_biotype:protein_coding transcript_biotype:protein_coding description:nucleoside diphosphate kinase	2e-147	88.3191	0	0	3.12352	Ascomycota	Nucleoside diphosphate kinase	UniRef90_B8MDD6 Nucleoside diphosphate kinase n=3 Tax=Talaromyces TaxID=5094 RepID=B8MDD6_TALSN	No hit	0	0	1	No hit	0	0	0
AS_DN23846_c0_g1	KFX45357 cds supercontig:ASM75011v1:scf023:40241:43163:1 gene:GQ26_0230200 gene_biotype:protein_coding transcript_biotype:protein_coding description:ATP synthase subunit beta, mitochondrial	1e-125	83.4532	0	0	3.11822	Ascomycota	ATP synthase F1, beta subunit	UniRef90_D6QT64 ATP synthase F1 beta subunit (Fragment) n=1 Tax=Rhizoplaca chrysoleuca TaxID=112062 RepID=D6QT64_9LECA	No hit	0	0	1	No hit	0	gnl|TC-DB|A1B8P0|3.A.2.1.7 ATP synthase subunit beta OS=Paracoccus denitrificans (strain Pd 1222) GN=atpD PE=3 SV=1	80.5755
AS_DN42382_c0_g1	KFX50153 cds supercontig:ASM75011v1:scf008:783549:785466:-1 gene:GQ26_0082990 gene_biotype:protein_coding transcript_biotype:protein_coding description:Elongation factor 1-gamma 2	0	92.1444	0	0	3.09561	Ascomycota	Translation elongation factor eEF-1 subunit gamma	UniRef90_A0A2H3HXZ6 Translation elongation factor EF1B, gamma chain, conserved n=1 Tax=Penicillium occitanis TaxID=290292 RepID=A0A2H3HXZ6_9EURO	No hit	0	0	1	No hit	0	0	0
AS_DN127488_c1_g1	OKL59071 cds supercontig:ASM190759v1:scaffold_7:1181474:1182002:1 gene:UA08_05847 gene_biotype:protein_coding transcript_biotype:protein_coding description:Autophagy-related protein 8	3e-96	82.0728	0	0	3.08953	Ascomycota	Autophagy-related protein 8	UniRef90_Q8J282 Autophagy-related protein 8 n=307 Tax=Eukaryota TaxID=2759 RepID=ATG8_PODAS	No hit	0	0	1	No hit	0	gnl|TC-DB|A8MS84|9.A.15.3.1 Autophagy-related protein OS=Arabidopsis thaliana GN=APG8A PE=3 SV=1	81.5126
AS_DN32061_c0_g1	EED21196 cds supercontig:JCVI-TSTA1-3.0:scf_1105507295527:1057529:1058643:-1 gene:TSTA_084270 gene_biotype:protein_coding transcript_biotype:protein_coding description:carboxyphosphonoenolpyruvate phosphonomutase, putative	0	83.223	0	0	3.07193	Ascomycota	Carboxyvinyl-carboxyphosphonate phosphorylmutase	UniRef90_B8M099 Carboxyphosphonoenolpyruvate phosphonomutase, putative n=4 Tax=Eurotiales TaxID=5042 RepID=B8M099_TALSN	No hit	0	0	1	No hit	0	0	0
AS_DN17530_c0_g1	KFX47181 cds supercontig:ASM75011v1:scf016:550543:552127:-1 gene:GQ26_0162030 gene_biotype:protein_coding transcript_biotype:protein_coding description:Acyl-CoA desaturase	5e-170	90.4762	0	0	3.06264	Ascomycota	Delta-9 fatty acid desaturase (Fragment)	UniRef90_B8M3X2 Acyl-CoA desaturase n=5 Tax=Eurotiales TaxID=5042 RepID=B8M3X2_TALSN	No hit	0	0	1	No hit	0	0	0
AS_DN15687_c0_g1	EEA20997 cds supercontig:JCVI-PMFA1-2.0:scf_1105668340738:2531930:2534095:-1 gene:PMAA_048030 gene_biotype:protein_coding transcript_biotype:protein_coding description:MFS phosphate transporter, putative	0	89.6086	0	0	3.05216	Ascomycota	MFS general substrate transporter	UniRef90_B8M8R4 MFS phosphate transporter, putative n=4 Tax=Eurotiales TaxID=5042 RepID=B8M8R4_TALSN	No hit	0	0	1	No hit	0	0	0
AS_DN10611_c0_g1	KFX48366 cds supercontig:ASM75011v1:scf012:247342:249305:-1 gene:GQ26_0120880 gene_biotype:protein_coding transcript_biotype:protein_coding description:Histone H2A.Z	1e-109	85.0153	0	0	3.04736	Ascomycota	NA	UniRef90_A0A0D2FPT2 Histone H2A n=1 Tax=Phialophora americana TaxID=5601 RepID=A0A0D2FPT2_9EURO	No hit	0	0	1	No hit	0	0	0
AS_DN116367_c0_g1	KFX41835 cds supercontig:ASM75011v1:scf053:88001:90443:1 gene:GQ26_0530320 gene_biotype:protein_coding transcript_biotype:protein_coding description:SH3 domain-containing YSC84-like protein 1	0	84.2986	0	0	3.03483	Ascomycota	DUF500 domain protein (Fragment)	UniRef90_A0A2H3II47 Uncharacterized protein n=1 Tax=Penicillium occitanis TaxID=290292 RepID=A0A2H3II47_9EURO	No hit	0	0	1	No hit	0	0	0
AS_DN123929_c0_g1	KFX42680 cds supercontig:ASM75011v1:scf042:207877:209710:-1 gene:GQ26_0420750 gene_biotype:protein_coding transcript_biotype:protein_coding description:ATPase inhibitor, mitochondrial	2e-113	76.9648	0	0	3.03443	Ascomycota	Mitochondrial ATPase inhibitor IATP	UniRef90_B8MED3 ATPase inhibitor, mitochondrial, putative n=1 Tax=Talaromyces stipitatus (strain ATCC 10500 / CBS 375.48/ QM 6759 / NRRL 1006) TaxID=441959 RepID=B8MED3_TALSN	No hit	0	0	1	No hit	0	0	0
AS_DN31344_c0_g1	KFX41605 cds supercontig:ASM75011v1:scf056:3550:5602:-1 gene:GQ26_0560030 gene_biotype:protein_coding transcript_biotype:protein_coding description:D-arabinitol 2-dehydrogenase [ribulose-forming]	0	92.2252	0	0	3.03051	Ascomycota	Dehydrogenase with different specificitie	UniRef90_B6QDY0 D-arabinitol dehydrogenase ArbD, putative n=5 Tax=Eurotiales TaxID=5042 RepID=B6QDY0_TALMQ	No hit	0	0	1	No hit	0	0	0
AS_DN30232_c0_g1	KFX52462 cds supercontig:ASM75011v1:scf003:895104:899287:-1 gene:GQ26_0033210 gene_biotype:protein_coding transcript_biotype:protein_coding description:Phosphoenolpyruvate carboxykinase[ATP]	0	91.7918	0	0	3.02007	Ascomycota	ATP-utilizing phosphoenolpyruvate carboxykinase	UniRef90_B8LTJ2 Phosphoenolpyruvate carboxykinase AcuF n=4 Tax=Eurotiales TaxID=5042 RepID=B8LTJ2_TALSN	No hit	0	0	1	No hit	0	0	0
AS_DN46396_c1_g1	OKL56399 cds supercontig:ASM190759v1:scaffold_13:97087:98596:-1 gene:UA08_08074 gene_biotype:protein_coding transcript_biotype:protein_coding description:hypothetical protein	4e-152	83.8596	0	0	3.01707	Ascomycota	GPI-anchored cell wall beta-1,3-endoglucanase EglC	UniRef90_A0A225ALG7 Uncharacterized protein n=1 Tax=Talaromyces atroroseus TaxID=1441469 RepID=A0A225ALG7_9EURO	No hit	0	0	1	GH17(19)	0	0	0
AS_DN29063_c0_g1	GAM42203 cds supercontig:TcelY94_1.0:DF933839.1:860599:861930:-1 gene:TCE0_043r15951 gene_biotype:protein_coding transcript_biotype:protein_coding description:bZIP transcription factor	0	97.7883	0	0	3.00197	Ascomycota	Transcriptional activator hacA	UniRef90_A0A0B8N4N0 BZIP transcription factor n=1 Tax=Talaromyces cellulolyticus TaxID=1472165 RepID=A0A0B8N4N0_9EURO	No hit	0	0	1	No hit	0	0	0
AS_DN76092_c0_g1	EEA24439 cds supercontig:JCVI-PMFA1-2.0:scf_1105668340960:2125299:2128027:1 gene:PMAA_084430 gene_biotype:protein_coding transcript_biotype:protein_coding description:serine/threonine protein kinase, putative	0	93.2343	0	0	3.00026	Ascomycota	NA	UniRef90_B6QG54 Serine/threonine protein kinase, putative n=4 Tax=Eurotiales TaxID=5042 RepID=B6QG54_TALMQ	No hit	0	0	1	No hit	0	0	0
AS_DN74019_c0_g1	KFX42049 cds supercontig:ASM75011v1:scf050:129198:130734:-1 gene:GQ26_0500410 gene_biotype:protein_coding transcript_biotype:protein_coding description:D-arabinose 1-dehydrogenase	4e-111	81.7518	0	0	2.99062	Ascomycota	NA	UniRef90_A0A2H3HZG0 Aldo/keto reductase n=1 Tax=Penicillium occitanis TaxID=290292 RepID=A0A2H3HZG0_9EURO	No hit	0	0	1	No hit	0	0	0
AS_DN78412_c0_g1	OKL60080 cds supercontig:ASM190759v1:scaffold_5:1400267:1401276:-1 gene:UA08_04944 gene_biotype:protein_coding transcript_biotype:protein_coding description:hypothetical protein	2e-83	78.125	0	0	2.98794	Ascomycota	NA	UniRef90_A0A254U614 Dioxygenase family protein n=1 Tax=Aspergillus niger TaxID=5061 RepID=A0A254U614_ASPNG	No hit	0	0	1	No hit	0	0	0
AS_DN133964_c0_g1	EEA26348 cds supercontig:JCVI-PMFA1-2.0:scf_1105668340758:3443356:3445245:1 gene:PMAA_074210 gene_biotype:protein_coding transcript_biotype:protein_coding description:sugar 1,4-lactone oxidase, putative	2e-175	87.8095	0	0	2.98276	Ascomycota	NA	UniRef90_B6QAX0 Sugar 1,4-lactone oxidase, putative n=3 Tax=Eurotiales TaxID=5042 RepID=B6QAX0_TALMQ	No hit	0	0	1	No hit	0	0	0
AS_DN12004_c0_g1	EED13209 cds supercontig:JCVI-TSTA1-3.0:scf_1105507295487:1363078:1366494:1 gene:TSTA_057050 gene_biotype:protein_coding transcript_biotype:protein_coding description:translation elongation factor EF-2 subunit, putative	1e-71	77.3333	0	0	2.97637	Ascomycota	Translation elongation factor 2	UniRef90_Q0UQC6 Uncharacterized protein n=12 Tax=Pleosporineae TaxID=715340 RepID=Q0UQC6_PHANO	No hit	0	0	1	No hit	0	0	0
AS_DN64205_c0_g1	EEA27953 cds supercontig:JCVI-PMFA1-2.0:scf_1105668340764:3396614:3399875:-1 gene:PMAA_027890 gene_biotype:protein_coding transcript_biotype:protein_coding description:ribonucleotide reductase large subunit Rnr1, putative	3e-137	89.5833	0	0	2.97053	Ascomycota	Ribonucleotide reductase large subunit Rnr1	UniRef90_B8LTT9 Ribonucleoside-diphosphate reductase n=5 Tax=Eurotiales TaxID=5042 RepID=B8LTT9_TALSN	No hit	0	0	1	No hit	0	0	0
AS_DN21256_c0_g1	GAM42031 cds supercontig:TcelY94_1.0:DF933839.1:307002:308430:1 gene:TCE0_043f15640 gene_biotype:protein_coding transcript_biotype:protein_coding description:hypothetical protein	0	96.8046	0	0	2.96371	Ascomycota	Phosphatidyl synthase	UniRef90_A0A2H3IHW1 HAD-superfamily hydrolase, subfamily IIA, CECR5 n=5 Tax=Eurotiales TaxID=5042 RepID=A0A2H3IHW1_9EURO	No hit	0	0	1	No hit	0	0	0
AS_DN61371_c0_g1	KFX45613 cds supercontig:ASM75011v1:scf022:107033:108915:1 gene:GQ26_0220360 gene_biotype:protein_coding transcript_biotype:protein_coding description:60S ribosomal export protein NMD3	0	90.9204	0	0	2.9627	Ascomycota	Nonsense-mediated mRNA decay protein 3	UniRef90_A0A2H3IJX0 60S ribosomal export protein NMD3 n=9 Tax=Eurotiales TaxID=5042 RepID=A0A2H3IJX0_9EURO	No hit	0	0	1	No hit	0	0	0
AS_DN20458_c0_g1	OKL59291 cds supercontig:ASM190759v1:scaffold_6:869008:870556:-1 gene:UA08_05223 gene_biotype:protein_coding transcript_biotype:protein_coding description:Aldehyde dehydrogenase	5e-156	82.6531	0	0	2.95279	Ascomycota	NA	UniRef90_B8MEP3 Aldehyde dehydrogenase, putative n=1 Tax=Talaromyces stipitatus (strain ATCC 10500 / CBS 375.48 / QM 6759/ NRRL 1006) TaxID=441959 RepID=B8MEP3_TALSN	No hit	0	0	1	No hit	0	0	0
AS_DN114393_c0_g1	KFX46304 cds supercontig:ASM75011v1:scf019:131405:133466:1 gene:GQ26_0190540 gene_biotype:protein_coding transcript_biotype:protein_coding description:6-phosphogluconate dehydrogenase,decarboxylating 2	6e-140	71.3748	0	0	2.94894	Asco or Basidio	6-phosphogluconate dehydrogenase	UniRef90_A0A165DDN6 6-phosphogluconate dehydrogenase, decarboxylating n=1 Tax=Exidia glandulosa HHB12029 TaxID=1314781 RepID=A0A165DDN6_EXIGL	No hit	0	0	1	No hit	0	0	0
AS_DN40864_c1_g1	OKL63540 cds supercontig:ASM190759v1:scaffold_1:372449:374127:1 gene:UA08_01209 gene_biotype:protein_coding transcript_biotype:protein_coding description:putative UTP--glucose-1-phosphate uridylyltransferase	2e-97	84.3305	0	0	2.93331	Ascomycota	NA	No hits	No hit	0	0	1	No hit	0	0	0
AS_DN35352_c0_g1	KFX40863 cds supercontig:ASM75011v1:scf090:1822:7970:-1 gene:GQ26_0900020 gene_biotype:protein_coding transcript_biotype:protein_coding description:putative amino-acid permease P7G5.06	0	88.9474	0	0	2.90179	Ascomycota	High-affinity amino acid transporter	UniRef90_B6QML1 General amino-acid permease GAP1, putative n=3 Tax=Eurotiales TaxID=5042 RepID=B6QML1_TALMQ	No hit	0	0	1	No hit	0	gnl|TC-DB|Q2VQZ4|2.A.3.10.22 Putative amino acid permease OS=Glomus mosseae PE=2 SV=1	70.5263
AS_DN23536_c0_g1	OKL63694 cds supercontig:ASM190759v1:scaffold_0:2018126:2018967:-1 gene:UA08_00714 gene_biotype:protein_coding transcript_biotype:protein_coding description:Superoxide dismutase	2e-70	76.3441	0	0	2.89418	Ascomycota	Superoxide dismutase [Cu-Zn]	UniRef90_W6YY07 Superoxide dismutase [Cu-Zn] n=11 Tax=Pleosporineae TaxID=715340 RepID=W6YY07_COCMI	No hit	0	0	1	No hit	0	0	0
AS_DN117942_c0_g1	EEA23984 cds supercontig:JCVI-PMFA1-2.0:scf_1105668340960:894138:900369:1 gene:PMAA_080030 gene_biotype:protein_coding transcript_biotype:protein_coding description:1,3-beta-glucan synthase catalytic subunit FksP	0	88.5481	0	0	2.891	Ascomycota	NA	UniRef90_B8MDC3 1,3-beta-glucan synthase catalytic subunit FksP n=4 Tax=Eurotiales TaxID=5042 RepID=B8MDC3_TALSN	No hit	0	0	1	GT48+2.4.1.34	0	0	0
AS_DN59949_c0_g1	GAM40203 cds supercontig:TcelY94_1.0:DF933834.1:212633:213538:1 gene:TCE0_038f12364 gene_biotype:protein_coding transcript_biotype:protein_coding description:actin cytoskeleton protein	0	88.7731	0	0	2.86726	Ascomycota	Nucleotide-binding, alpha-beta plait	UniRef90_B6QD18 Actin cytoskeleton protein (VIP1), putative n=4 Tax=Eurotiales TaxID=5042 RepID=B6QD18_TALMQ	No hit	0	0	1	No hit	0	0	0
AS_DN94738_c0_g1	OKL59140 cds supercontig:ASM190759v1:scaffold_7:863751:865117:-1 gene:UA08_05769 gene_biotype:protein_coding transcript_biotype:protein_coding description:Protein ecm33	1e-79	76.1438	0	0	2.85574	Ascomycota	NA	UniRef90_A0A225AEZ4 Protein ecm33 n=1 Tax=Talaromyces atroroseus TaxID=1441469 RepID=A0A225AEZ4_9EURO	No hit	0	0	1	No hit	0	0	0
AS_DN43550_c3_g1	GAM40208 cds supercontig:TcelY94_1.0:DF933834.1:227722:229970:1 gene:TCE0_038f12371 gene_biotype:protein_coding transcript_biotype:protein_coding description:mitochondrial matrix ATPase subunit	4e-154	99.6633	0	0	2.84565	Ascomycota	NA	UniRef90_A0A0U1M777 Heat shock 70 kDa protein n=2 Tax=Eurotiales TaxID=5042 RepID=A0A0U1M777_TALIS	Hsp70	0	0	1	No hit	0	gnl|TC-DB|P0A6Y8|1.A.33.1.2 Chaperone protein dnaK - Escherichia coli.	80.8081
AS_DN91936_c0_g1	GAM42200 cds supercontig:TcelY94_1.0:DF933839.1:854967:856846:-1 gene:TCE0_043r15948 gene_biotype:protein_coding transcript_biotype:protein_coding description:fasciclin domain family protein	0	95.2641	0	0	2.8386	Ascomycota	NA	No hits	No hit	0	0	1	No hit	0	0	0
AS_DN21420_c0_g1	KFX41648 cds supercontig:ASM75011v1:scf056:89461:92348:1 gene:GQ26_0560320 gene_biotype:protein_coding transcript_biotype:protein_coding description:Aconitate hydratase, mitochondrial	4e-132	82.8678	0	0.179997	2.83419	Ascomycota	NA	UniRef90_A0A2N6N8P5 Uncharacterized protein n=1 Tax=Beauveria bassiana TaxID=176275 RepID=A0A2N6N8P5_BEABA	No hit	0	0.122229	0.992502	No hit	0	0	0
AS_DN129326_c0_g1	KFX49079 cds supercontig:ASM75011v1:scf010:312942:313921:-1 gene:GQ26_0101150 gene_biotype:protein_coding transcript_biotype:protein_coding description:Serine palmitoyltransferase small subunit A-A	3e-126	90	0	0	2.83384	Ascomycota	Serine palmitoyltransferase small subunit A-A	UniRef90_B6Q2F4 Uncharacterized protein n=3 Tax=Eurotiales TaxID=5042 RepID=B6Q2F4_TALMQ	No hit	0	0	1	No hit	0	0	0
AS_DN132409_c0_g1	GAM33417 cds supercontig:TcelY94_1.0:DF933800.1:309199:310079:-1 gene:TCE0_004r00295 gene_biotype:protein_coding transcript_biotype:protein_coding description:mitochondrial hypoxia responsive domain protein	0	76.5358	0	0	2.83217	Ascomycota	Respiratory supercomplex factor	UniRef90_A0A0B8MXH0 Mitochondrial hypoxia responsive domain protein n=2 Tax=Eurotiales TaxID=5042 RepID=A0A0B8MXH0_9EURO	No hit	0	0	1	No hit	0	0	0
AS_DN42158_c0_g1	KFX43968 cds supercontig:ASM75011v1:scf031:112699:115715:1 gene:GQ26_0310380 gene_biotype:protein_coding transcript_biotype:protein_coding description:Protein kinase wis1	0	86.0153	0	0	2.82589	Ascomycota	Putative mitogen activated protein kinase kinase	UniRef90_B6QBV2 MAP kinase kinase (Pbs2), putative n=2 Tax=Talaromyces marneffei TaxID=37727 RepID=B6QBV2_TALMQ	No hit	0	0	1	No hit	0	0	0
AS_DN6763_c0_g1	OKL57375 cds supercontig:ASM190759v1:scaffold_11:1164439:1165450:-1 gene:UA08_07690 gene_biotype:protein_coding transcript_biotype:protein_coding description:GTP-binding protein ypt1	4e-124	92.5566	0	0	2.82557	Ascomycota	GTP-binding protein ypt1	UniRef90_A1CZN3 Rab15, 13, 10, 1, 35, 5, and n=10 Tax=leotiomyceta TaxID=716546 RepID=A1CZN3_NEOFI	No hit	0	0	1	No hit	0	0	0
AS_DN117960_c0_g1	KFX52874 cds supercontig:ASM75011v1:scf002:758783:762349:1 gene:GQ26_0022650 gene_biotype:protein_coding transcript_biotype:protein_coding description:ATP synthase subunit alpha, mitochondrial	5e-164	93.6508	0	0	2.82203	Ascomycota	NA	UniRef90_B8MQK3 ATP synthase subunit alpha n=5 Tax=Eurotiales TaxID=5042 RepID=B8MQK3_TALSN	No hit	0	0	1	No hit	0	gnl|TC-DB|P07251|3.A.2.1.3 ATP synthase alpha chain, mitochondrial precursor (EC 3.6.1.34) - Saccharomyces cerevisiae (Baker's yeast).	77.7778
AS_DN87355_c0_g1	GAM43540 cds supercontig:TcelY94_1.0:DF933846.1:532270:534141:1 gene:TCE0_050f18432 gene_biotype:protein_coding transcript_biotype:protein_coding description:hypothetical protein	2e-137	93.4579	0	0	2.82119	Ascomycota	NA	UniRef90_B8MTW3 Uncharacterized protein n=5 Tax=Eurotiales TaxID=5042 RepID=B8MTW3_TALSN	No hit	0	0	1	No hit	0	0	0
AS_DN102312_c0_g1	KFX52471 cds supercontig:ASM75011v1:scf003:910372:914234:-1 gene:GQ26_0033270 gene_biotype:protein_coding transcript_biotype:protein_coding description:Serine/threonine-protein kinase nrc-2	3e-125	91.0256	0	0	2.80711	Ascomycota	NA	UniRef90_B8LTI4 Serine/threonine protein kinase (Nrc-2), putative n=5 Tax=Eurotiales TaxID=5042 RepID=B8LTI4_TALSN	No hit	0	0	1	No hit	0	0	0
AS_DN134431_c0_g1	KFX42495 cds supercontig:ASM75011v1:scf044:151981:153269:-1 gene:GQ26_0440620 gene_biotype:protein_coding transcript_biotype:protein_coding description:40S ribosomal protein S2	2e-119	79.1383	0	0	2.804	Ascomycota	Ribosomal protein S5	UniRef90_A0A1S9DEJ5 Ribosomal protein S5 n=1 Tax=Aspergillus oryzae TaxID=5062 RepID=A0A1S9DEJ5_ASPOZ	No hit	0	0	1	No hit	0	0	0
AS_DN117005_c0_g1	EED19255 cds supercontig:JCVI-TSTA1-3.0:scf_1105507295541:654597:656989:1 gene:TSTA_025710 gene_biotype:protein_coding transcript_biotype:protein_coding description:spore-specific catalase CatA	3e-162	87.3767	0	0	2.80192	Ascomycota	Catalase-1	UniRef90_B8M4R0 Catalase n=4 Tax=Eurotiales TaxID=5042 RepID=B8M4R0_TALSN	No hit	0	0	1	No hit	0	0	0
AS_DN102094_c0_g1	KFX42624 cds supercontig:ASM75011v1:scf042:74117:75034:-1 gene:GQ26_0420300 gene_biotype:protein_coding transcript_biotype:protein_coding description:60S ribosomal protein L28	1e-145	93.0303	0.0895337	0	2.76864	Ascomycota	Ribosomal protein L22	UniRef90_B8MEI5 60S ribosomal protein L27a, putative n=3 Tax=Talaromyces TaxID=5094 RepID=B8MEI5_TALSN	No hit	0.0644987	0	0.997918	No hit	0	0	0
AS_DN815_c0_g1	KFX48099 cds supercontig:ASM75011v1:scf013:443408:447586:1 gene:GQ26_0131680 gene_biotype:protein_coding transcript_biotype:protein_coding description:ATP-dependent RNA helicase dbp2	0	93.5354	0	0	2.76573	Ascomycota	DEADDEAH box helicase	UniRef90_A0A2H3I8X5 Uncharacterized protein n=1 Tax=Penicillium occitanis TaxID=290292 RepID=A0A2H3I8X5_9EURO	No hit	0	0	1	No hit	0	0	0
AS_DN130863_c0_g1	KFX48039 cds supercontig:ASM75011v1:scf013:292310:298343:1 gene:GQ26_0131120 gene_biotype:protein_coding transcript_biotype:protein_coding description:SET domain-containing protein 3	1e-125	88.2667	0	0	2.76458	Ascomycota	NA	UniRef90_A0A093VDL0 SET domain-containing protein 3 n=2 Tax=Talaromyces marneffei TaxID=37727 RepID=A0A093VDL0_TALMA	No hit	0	0	1	No hit	0	0	0
AS_DN66404_c0_g1	KFX42569 cds supercontig:ASM75011v1:scf043:155463:158003:-1 gene:GQ26_0430550 gene_biotype:protein_coding transcript_biotype:protein_coding description:hypothetical protein	4e-150	89.951	0	0	2.76435	Ascomycota	NA	UniRef90_A0A093UXY3 Uncharacterized protein n=1 Tax=Talaromyces marneffei PM1 TaxID=1077442 RepID=A0A093UXY3_TALMA	No hit	0	0	1	No hit	0	0	0
AS_DN104815_c0_g1	KFX48315 cds supercontig:ASM75011v1:scf012:137076:138518:1 gene:GQ26_0120470 gene_biotype:protein_coding transcript_biotype:protein_coding description:Trans-1,2-dihydrobenzene-1,2-diol dehydrogenase	2e-107	86.3095	0	0	2.7605	Ascomycota	NA	UniRef90_B6QPP7 NAD binding Rossmann fold oxidoreductase, putative n=4 Tax=Eurotiales TaxID=5042 RepID=B6QPP7_TALMQ	No hit	0	0	1	No hit	0	0	0
AS_DN128077_c0_g1	GAM37268 cds supercontig:TcelY94_1.0:DF933819.1:161778:166045:1 gene:TCE0_023f07050 gene_biotype:protein_coding transcript_biotype:protein_coding description:hypothetical protein	0	96.732	0	0	2.75848	Ascomycota	Putative allantoin permease	UniRef90_A0A2H3J730 Permease, cytosine/purines, uracil, thiamine, allantoin n=2 Tax=Eurotiales TaxID=5042 RepID=A0A2H3J730_9EURO	No hit	0	0	1	No hit	0	0	0
AS_DN15982_c0_g1	KFX47730 cds supercontig:ASM75011v1:scf014:380265:381578:1 gene:GQ26_0141340 gene_biotype:protein_coding transcript_biotype:protein_coding description:60S ribosomal protein L10a	2e-73	72.9323	0	0	2.74329	Ascomycota	NA	UniRef90_A0A1Y1ZZK6 Ribosomal protein n=22 Tax=leotiomyceta TaxID=716546 RepID=A0A1Y1ZZK6_9PLEO	No hit	0	0	1	No hit	0	0	0
AS_DN130140_c0_g1	EED13492 cds supercontig:JCVI-TSTA1-3.0:scf_1105507295511:61108:62149:1 gene:TSTA_097480 gene_biotype:protein_coding transcript_biotype:protein_coding description:RTA1 domain protein,putative	0	89.2361	0	0	2.71949	Ascomycota	RTA1 like protein-domain-containing protein	UniRef90_A0A2H3J2N9 RTA-like protein n=1 Tax=Penicillium occitanis TaxID=290292 RepID=A0A2H3J2N9_9EURO	No hit	0	0	1	No hit	0	0	0
AS_DN29232_c0_g1	GAM42143 cds supercontig:TcelY94_1.0:DF933839.1:660951:662820:1 gene:TCE0_043f15843 gene_biotype:protein_coding transcript_biotype:protein_coding description:hypothetical protein	0	96.5152	0	0	2.71018	Ascomycota	NA	UniRef90_A0A2H3IMS2 Uncharacterized protein n=2 Tax=Eurotiales TaxID=5042 RepID=A0A2H3IMS2_9EURO	No hit	0	0	1	No hit	0	0	0
AS_DN63702_c0_g1	KFX52628 cds supercontig:ASM75011v1:scf002:196628:197821:-1 gene:GQ26_0020680 gene_biotype:protein_coding transcript_biotype:protein_coding description:hypothetical protein	0	88.674	0	0	2.70744	Ascomycota	Ubiquitin conjugating enzyme	UniRef90_A0A2H3IX32 Uncharacterized protein n=1 Tax=Penicillium occitanis TaxID=290292 RepID=A0A2H3IX32_9EURO	No hit	0	0	1	No hit	0	0	0
AS_DN118515_c0_g1	GAM40210 cds supercontig:TcelY94_1.0:DF933834.1:237283:238939:-1 gene:TCE0_038r12377 gene_biotype:protein_coding transcript_biotype:protein_coding description:Fcy21 homolog	0	94.2029	0	0	2.70337	Ascomycota	NA	No hits	No hit	0	0	1	No hit	0	0	0
AS_DN26540_c0_g1	EEA28899 cds supercontig:JCVI-PMFA1-2.0:scf_1105668340764:5867220:5869120:-1 gene:PMAA_036890 gene_biotype:protein_coding transcript_biotype:protein_coding description:RNA annealing protein Yra1, putative	6e-103	90.2516	0	0	2.70201	Ascomycota	RNA recognition domain-containing protein containing protein	UniRef90_B8MRC3 RNA annealing protein Yra1, putative n=1 Tax=Talaromyces stipitatus (strain ATCC 10500 / CBS 375.48 / QM 6759 / NRRL 1006) TaxID=441959 RepID=B8MRC3_TALSN	No hit	0	0	1	No hit	0	0	0
AS_DN80095_c0_g1	KFX43120 cds supercontig:ASM75011v1:scf038:210847:212834:1 gene:GQ26_0380730 gene_biotype:protein_coding transcript_biotype:protein_coding description:Aldehyde dehydrogenase	4e-140	87.9032	0	0	2.70188	Ascomycota	NA	UniRef90_B6QNM1 Aldehyde dehydrogenase, putative n=3 Tax=Eurotiales TaxID=5042 RepID=B6QNM1_TALMQ	No hit	0	0	1	No hit	0	0	0
AS_DN102803_c0_g1	EEA27026 cds supercontig:JCVI-PMFA1-2.0:scf_1105668340764:1078633:1080439:1 gene:PMAA_019280 gene_biotype:protein_coding transcript_biotype:protein_coding description:aspartic endopeptidase Pep2	0	93.4397	0	0	2.70182	Ascomycota	Vacuolar protease A	UniRef90_B8M4Z6 Aspartic endopeptidase Pep2 n=3 Tax=Eurotiales TaxID=5042 RepID=B8M4Z6_TALSN	No hit	0	0	1	No hit	0	0	0
AS_DN13882_c0_g1	EEA28961 cds supercontig:JCVI-PMFA1-2.0:scf_1105668340764:6029521:6031810:-1 gene:PMAA_037440 gene_biotype:protein_coding transcript_biotype:protein_coding description:ribosome biogenesis ABC transporter Arb1, putative	0	86.2524	0	0.0462662	2.68538	Ascomycota	ATP-binding cassette sub-family F member 2	UniRef90_A0A093UZL0 ABC transporter ATP-binding protein ARB1 n=1 Tax=Talaromyces marneffei PM1 TaxID=1077442 RepID=A0A093UZL0_TALMA	No hit	0	0.0346531	0.999399	No hit	0	0	0
AS_DN102576_c0_g1	KFX45632 cds supercontig:ASM75011v1:scf022:139211:140712:1 gene:GQ26_0220470 gene_biotype:protein_coding transcript_biotype:protein_coding description:60S ribosomal protein L32	8e-167	96.0784	0	0	2.6768	Ascomycota	Ribosomal protein L32	UniRef90_B8MPX4 60S ribosomal protein L32 n=2 Tax=Talaromyces TaxID=5094 RepID=B8MPX4_TALSN	No hit	0	0	1	No hit	0	0	0
AS_DN61093_c0_g1	KFX51037 cds supercontig:ASM75011v1:scf006:755772:756948:-1 gene:GQ26_0062890 gene_biotype:protein_coding transcript_biotype:protein_coding description:40S ribosomal protein S26E	5e-110	72.1429	0	0	2.67496	Ascomycota	40S ribosomal protein S26	UniRef90_D5G9E5 40S ribosomal protein S26 n=52 Tax=Pezizomycotina TaxID=147538 RepID=D5G9E5_TUBMM	No hit	0	0	1	No hit	0	0	0
AS_DN1225_c0_g1	KFX48461 cds supercontig:ASM75011v1:scf012:474267:477497:-1 gene:GQ26_0121730 gene_biotype:protein_coding transcript_biotype:protein_coding description:Bromodomain-containing factor 1	0	87.4372	0	0	2.67168	Ascomycota	NA	UniRef90_B8LWQ9 Transcription regulator BDF1, putative n=1 Tax=Talaromyces stipitatus (strain ATCC 10500 / CBS 375.48 / QM 6759 / NRRL 1006) TaxID=441959 RepID=B8LWQ9_TALSN	No hit	0	0	1	No hit	0	0	0
AS_DN65223_c0_g1	KFX41863 cds supercontig:ASM75011v1:scf052:29751:32015:-1 gene:GQ26_0520090 gene_biotype:protein_coding transcript_biotype:protein_coding description:Protein SQS1	1e-125	92.1384	0	0	2.66896	Ascomycota	NA	UniRef90_A0A2H3IHF9 Single-stranded nucleic acid binding R3H n=1 Tax=Penicillium occitanis TaxID=290292 RepID=A0A2H3IHF9_9EURO	No hit	0	0	1	No hit	0	0	0
AS_DN134487_c0_g1	KFX44410 cds supercontig:ASM75011v1:scf028:34699:37383:-1 gene:GQ26_0280150 gene_biotype:protein_coding transcript_biotype:protein_coding description:UV excision repair protein rhp23	0	89.5115	0	0	2.66178	Ascomycota	Ubiquitin supergroup	UniRef90_A0A225AQA0 Uncharacterized protein n=1 Tax=Talaromyces atroroseus TaxID=1441469 RepID=A0A225AQA0_9EURO	No hit	0	0	1	No hit	0	gnl|TC-DB|S3DAG4|8.A.52.1.6 Ubiquitin-like protein OS=Glarea lozoyensis (strain ATCC 20868 / MF5171) GN=GLAREA_11146 PE=4 SV=1	70.2586
AS_DN37141_c0_g1	EED19180 cds supercontig:JCVI-TSTA1-3.0:scf_1105507295541:479950:480928:1 gene:TSTA_025020 gene_biotype:protein_coding transcript_biotype:protein_coding description:mitochondrial F1F0 ATP synthase subunit Atp14, putative	2e-138	76.1261	0	0	2.64835	Ascomycota	ATP synthase complex subunit h	UniRef90_A0A093V8T6 ATP synthase subunit H, mitochondrial n=2 Tax=Talaromyces marneffei TaxID=37727 RepID=A0A093V8T6_TALMA	No hit	0	0	1	No hit	0	0	0
AS_DN137627_c0_g1	CRG86229 cds supercontig:PIS:WF-38-12_scaffold00002:4037698:4038470:1 gene:PISL3812_03232 gene_biotype:protein_coding transcript_biotype:protein_coding description:60S ribosomal protein L24	2e-63	75	0	0	2.64018	Ascomycota	Large subunit ribosomal protein L24e	UniRef90_A0A1E2Y358 60S ribosomal protein L24 n=2 Tax=Paracoccidioides brasiliensis TaxID=121759 RepID=A0A1E2Y358_PARBR	No hit	0	0	1	No hit	0	0	0
AS_DN137858_c0_g1	KFX46434 cds supercontig:ASM75011v1:scf019:411300:417353:1 gene:GQ26_0191600 gene_biotype:protein_coding transcript_biotype:protein_coding description:Acetylcholinesterase	5e-104	88.0342	0	0	2.6383	Ascomycota	Proline dehydrogenase (Fragment)	UniRef90_A0A2H3I293 Proline dehydrogenase n=1 Tax=Penicillium occitanis TaxID=290292 RepID=A0A2H3I293_9EURO	No hit	0	0	1	No hit	0	0	0
AS_DN73367_c0_g1	EEA27301 cds supercontig:JCVI-PMFA1-2.0:scf_1105668340764:1758216:1759275:1 gene:PMAA_021880 gene_biotype:protein_coding transcript_biotype:protein_coding description:conserved hypothetical protein	0	90.1434	0.0280733	0	2.62531	Ascomycota	NA	UniRef90_A0A2H3IYI5 Uncharacterized protein n=1 Tax=Penicillium occitanis TaxID=290292 RepID=A0A2H3IYI5_9EURO	No hit	0.0214917	0	0.999769	No hit	0	0	0
AS_DN382_c0_g1	KFX50380 cds supercontig:ASM75011v1:scf007:345962:347992:1 gene:GQ26_0071230 gene_biotype:protein_coding transcript_biotype:protein_coding description:Indoleamine 2,3-dioxygenase	0	89.627	0	0	2.61767	Ascomycota	Indoleamine-dioxygenase subfamily	UniRef90_B8M563 Indoleamine 2,3-dioxygenase subfamily n=4 Tax=Eurotiales TaxID=5042 RepID=B8M563_TALSN	No hit	0	0	1	No hit	0	0	0
AS_DN127291_c0_g1	KFX50379 cds supercontig:ASM75011v1:scf007:342076:345105:1 gene:GQ26_0071220 gene_biotype:protein_coding transcript_biotype:protein_coding description:Cysteine desulfurase, mitochondrial	1e-160	89.038	0	0	2.61319	Ascomycota	IscS subfamily cysteine desulfurase (Fragment)	UniRef90_B8M562 tRNA splicing protein (Spl1), putative n=5 Tax=Eurotiales TaxID=5042 RepID=B8M562_TALSN	No hit	0	0	1	No hit	0	0	0
AS_DN114177_c0_g1	KFX43607 cds supercontig:ASM75011v1:scf034:182452:183317:-1 gene:GQ26_0340680 gene_biotype:protein_coding transcript_biotype:protein_coding description:40S ribosomal protein S8-B	0	97.8224	0	0	2.60588	Ascomycota	40S ribosomal protein S8	UniRef90_A0A225AQX1 40S ribosomal protein S8 n=2 Tax=Eurotiales TaxID=5042 RepID=A0A225AQX1_9EURO	No hit	0	0	1	No hit	0	0	0
AS_DN7303_c0_g1	GAM37280 cds supercontig:TcelY94_1.0:DF933819.1:202782:206663:-1 gene:TCE0_023r07073 gene_biotype:protein_coding transcript_biotype:protein_coding description:hypothetical protein	3e-100	70.3333	0	0	2.59677	Ascomycota	ATP-dependent RNA helicase HAS1 (Fragment)	UniRef90_B6QMX0 RNA helicase n=2 Tax=Eurotiales TaxID=5042 RepID=B6QMX0_TALMQ	No hit	0	0	1	No hit	0	0	0
AS_DN101454_c0_g1	KFX49835 cds supercontig:ASM75011v1:scf008:156876:158531:1 gene:GQ26_0080630 gene_biotype:protein_coding transcript_biotype:protein_coding description:putative solute carrier family 35 member	1e-114	89.5062	0	0	2.59608	Ascomycota	NA	UniRef90_B6QVV6 Uncharacterized protein n=3 Tax=Eurotiales TaxID=5042 RepID=B6QVV6_TALMQ	No hit	0	0	1	No hit	0	gnl|TC-DB|Q4WUA9|2.A.7.24.11 DUF914 domain membrane protein OS=Neosartorya fumigata (strain ATCC MYA-4609 / Af293 / CBS 101355/ FGSC A1100) GN=AFUA_5G07810 PE=4 SV=1	75
AS_DN92943_c0_g1	KFX44268 cds supercontig:ASM75011v1:scf029:58115:62707:-1 gene:GQ26_0290200 gene_biotype:protein_coding transcript_biotype:protein_coding description:Zinc finger CCCH domain-containing protein 45	2e-134	86.3636	0	0	2.59026	Ascomycota	NA	UniRef90_A0A2H3IDY0 Nucleotide-binding, alpha-beta plait n=1 Tax=Penicillium occitanis TaxID=290292 RepID=A0A2H3IDY0_9EURO	No hit	0	0	1	No hit	0	0	0
AS_DN38999_c0_g1	KFX43645 cds supercontig:ASM75011v1:scf034:266436:268293:-1 gene:GQ26_0340940 gene_biotype:protein_coding transcript_biotype:protein_coding description:Sugar transporter STL1	0	88.1797	0	0	2.58834	Ascomycota	Sugar transporter, putative	UniRef90_A0A093UUN7 Sugar transporter STL1 n=1 Tax=Talaromyces marneffei PM1 TaxID=1077442 RepID=A0A093UUN7_TALMA	No hit	0	0	1	No hit	0	0	0
AS_DN63786_c0_g1	EEA22160 cds supercontig:JCVI-PMFA1-2.0:scf_1105668340984:2541695:2542781:1 gene:PMAA_059400 gene_biotype:protein_coding transcript_biotype:protein_coding description:GPI anchored protein,putative	1e-118	78.0055	0	0	2.58494	Ascomycota	Low-density lipoprotein receptor-related protein 8	UniRef90_A0A2H3I8F0 Uncharacterized protein n=1 Tax=Penicillium occitanis TaxID=290292 RepID=A0A2H3I8F0_9EURO	No hit	0	0	1	No hit	SP(Sec/SPI)	0	0
AS_DN5572_c0_g1	KFX47858 cds supercontig:ASM75011v1:scf014:645135:647653:-1 gene:GQ26_0142340 gene_biotype:protein_coding transcript_biotype:protein_coding description:Adenosylhomocysteinase	4e-102	77.1318	0.0350253	0	2.58279	Ascomycota	NA	UniRef90_A0A1Y1LUS9 Uncharacterized protein (Fragment) n=1 Tax=Photinus pyralis TaxID=7054 RepID=A0A1Y1LUS9_PHOPY	No hit	0.0269667	0	0.999636	No hit	0	0	0
AS_DN74836_c0_g1	KFX46304 cds supercontig:ASM75011v1:scf019:131405:133466:1 gene:GQ26_0190540 gene_biotype:protein_coding transcript_biotype:protein_coding description:6-phosphogluconate dehydrogenase,decarboxylating 2	2e-117	91.0256	0	0	2.58189	Ascomycota	NA	UniRef90_A0A150V4X2 6-phosphogluconate dehydrogenase, decarboxylating n=1 Tax=Acidomyces richmondensis BFW TaxID=766039 RepID=A0A150V4X2_9PEZI	No hit	0	0	1	No hit	0	0	0
AS_DN87517_c0_g1	KFX40784 cds supercontig:ASM75011v1:scf101:7847:9478:1 gene:GQ26_1010030 gene_biotype:protein_coding transcript_biotype:protein_coding description:ATPase-stabilizing factor 15 kDa protein	1e-151	82.4786	0	0	2.57218	Ascomycota	ATPase-stabilizing factor 15 kDa protein, putative	UniRef90_A0A2H3J2F3 Uncharacterized protein n=1 Tax=Penicillium occitanis TaxID=290292 RepID=A0A2H3J2F3_9EURO	No hit	0	0	1	No hit	0	0	0
AS_DN75467_c0_g1	GAM42199 cds supercontig:TcelY94_1.0:DF933839.1:853437:854432:1 gene:TCE0_043f15946 gene_biotype:protein_coding transcript_biotype:protein_coding description:C2H2 finger domain protein	0	95.3771	0	0	2.52901	Ascomycota	NA	UniRef90_B6QTQ9 C2H2 finger domain protein (Kin17), putative n=4 Tax=Eurotiales TaxID=5042 RepID=B6QTQ9_TALMQ	No hit	0	0	1	No hit	0	0	0
AS_DN71621_c0_g1	GAM43326 cds supercontig:TcelY94_1.0:DF933843.1:683937:684758:-1 gene:TCE0_047r18050 gene_biotype:protein_coding transcript_biotype:protein_coding description:hypothetical protein	4e-149	96.8254	0	0	2.52624	Ascomycota	NA	UniRef90_B6QE59 Uncharacterized protein n=4 Tax=Eurotiales TaxID=5042 RepID=B6QE59_TALMQ	No hit	0	0	1	No hit	0	0	0
AS_DN87881_c0_g1	KFX50352 cds supercontig:ASM75011v1:scf007:278717:281443:-1 gene:GQ26_0070990 gene_biotype:protein_coding transcript_biotype:protein_coding description:Malate synthase, glyoxysomal	9e-101	90.0709	0	0	2.52622	Ascomycota	Malate synthase, glyoxysomal (Fragment)	UniRef90_B8M532 Malate synthase n=6 Tax=Eurotiales TaxID=5042 RepID=B8M532_TALSN	No hit	0	0	1	No hit	0	0	0
AS_DN1490_c0_g1	KFX53280 cds supercontig:ASM75011v1:scf001:393405:394840:-1 gene:GQ26_0011330 gene_biotype:protein_coding transcript_biotype:protein_coding description:Ubiquitin-conjugating enzyme E2 8	1e-120	90.303	0	0	2.52455	Ascomycota	Ubiquitin-conjugating enzyme h	UniRef90_A0A2H3J437 Ubiquitin-conjugating enzyme, E2 n=1 Tax=Penicillium occitanis TaxID=290292 RepID=A0A2H3J437_9EURO	No hit	0	0	1	No hit	0	0	0
AS_DN7413_c0_g1	KFX50725 cds supercontig:ASM75011v1:scf006:103942:105171:1 gene:GQ26_0060370 gene_biotype:protein_coding transcript_biotype:protein_coding description:40S ribosomal protein S7	4e-87	77.7778	0	0	2.5115	Ascomycota	40S ribosomal protein S7	UniRef90_A0A0D1XUD1 40S ribosomal protein S7 n=4 Tax=Dothideomycetes incertae sedis TaxID=159987 RepID=A0A0D1XUD1_9PEZI	No hit	0	0	1	No hit	0	0	0
AS_DN100773_c0_g1	EEA20553 cds supercontig:JCVI-PMFA1-2.0:scf_1105668340738:1373835:1375059:-1 gene:PMAA_043860 gene_biotype:protein_coding transcript_biotype:protein_coding description:60S ribosomal protein L35	1e-155	96.3964	0	0	2.51009	Ascomycota	Large subunit ribosomal protein L35e	UniRef90_A0A2H3IHU7 Ribosomal protein L29 n=1 Tax=Penicillium occitanis TaxID=290292 RepID=A0A2H3IHU7_9EURO	No hit	0	0	1	No hit	0	0	0
AS_DN19219_c0_g1	KFX47808 cds supercontig:ASM75011v1:scf014:540476:541977:1 gene:GQ26_0141990 gene_biotype:protein_coding transcript_biotype:protein_coding description:S-adenosylmethionine synthase	3e-106	87.2727	0	0.0544945	2.50966	Ascomycota	S-adenosylmethionine synthase	UniRef90_B8LW77 S-adenosylmethionine synthase n=4 Tax=Eurotiales TaxID=5042 RepID=B8LW77_TALSN	No hit	0	0.0422249	0.999108	No hit	0	0	0
AS_DN129060_c0_g1	KFX41267 cds supercontig:ASM75011v1:scf065:63712:64586:1 gene:GQ26_0650230 gene_biotype:protein_coding transcript_biotype:protein_coding description:Protein RCR2	8e-138	84.106	0	0	2.50761	Ascomycota	Chitin synthesis regulation resistance to Congo red	UniRef90_A0A093ULU9 Protein RCR2 n=2 Tax=Talaromyces marneffei TaxID=37727 RepID=A0A093ULU9_TALMA	No hit	0	0	1	No hit	0	0	0
AS_DN39308_c0_g1	EEA26559 cds supercontig:JCVI-PMFA1-2.0:scf_1105668340758:4019885:4021733:-1 gene:PMAA_076240 gene_biotype:protein_coding transcript_biotype:protein_coding description:calcineurin binding protein, putative	0	86.8288	0	0	2.50433	Ascomycota	Calcipressin	UniRef90_B6QC36 Calcineurin binding protein, putative n=2 Tax=Eurotiales TaxID=5042 RepID=B6QC36_TALMQ	No hit	0	0	1	No hit	0	0	0
AS_DN15948_c0_g1	KFX42926 cds supercontig:ASM75011v1:scf039:25145:29852:-1 gene:GQ26_0390080 gene_biotype:protein_coding transcript_biotype:protein_coding description:Elongation factor 3	0	94.4186	0	0	2.49024	Ascomycota	NA	UniRef90_B8MIV4 Translation elongation factor eEF-3, putative n=6 Tax=Eurotiales TaxID=5042 RepID=B8MIV4_TALSN	No hit	0	0	1	No hit	0	0	0
AS_DN65477_c0_g1	EEA28220 cds supercontig:JCVI-PMFA1-2.0:scf_1105668340764:4087440:4088007:1 gene:PMAA_030370 gene_biotype:protein_coding transcript_biotype:protein_coding description:cytochrome b5,putative	3e-167	92.6471	0	0	2.48879	Ascomycota	Cytochrome b	UniRef90_B8LYK3 Cytochrome b5, putative n=4 Tax=Eurotiales TaxID=5042 RepID=B8LYK3_TALSN	No hit	0	0	1	No hit	0	0	0
AS_DN540_c0_g1	KFX43509 cds supercontig:ASM75011v1:scf035:261219:262662:1 gene:GQ26_0350990 gene_biotype:protein_coding transcript_biotype:protein_coding description:putative oxidoreductase C26F1.07	2e-158	88.0795	0	0	2.46808	Ascomycota	Aldo/keto reductase	UniRef90_B6QRY7 Aldehyde reductase (AKR1), putative n=2 Tax=Talaromyces marneffei TaxID=37727 RepID=B6QRY7_TALMQ	No hit	0	0	1	No hit	0	0	0
AS_DN84861_c0_g1	GAM33322 cds supercontig:TcelY94_1.0:DF933800.1:15849:19000:1 gene:TCE0_004f00139 gene_biotype:protein_coding transcript_biotype:protein_coding description:hypothetical protein	4e-144	97.6431	0	0	2.467	Ascomycota	NA	UniRef90_A0A2H3I7D5 Uncharacterized protein n=3 Tax=Eurotiales TaxID=5042 RepID=A0A2H3I7D5_9EURO	No hit	0	0	1	No hit	0	0	0
AS_DN67443_c0_g1	OKL58329 cds supercontig:ASM190759v1:scaffold_9:67998:68537:-1 gene:UA08_06402 gene_biotype:protein_coding transcript_biotype:protein_coding description:hypothetical protein	2e-88	80	0	0	2.4668	Ascomycota	Chitinase	UniRef90_A0A225ARX2 Uncharacterized protein n=1 Tax=Talaromyces atroroseus TaxID=1441469 RepID=A0A225ARX2_9EURO	No hit	0	0	1	No hit	0	0	0
AS_DN63373_c0_g1	CRG89133 cds supercontig:PIS:WF-38-12_scaffold00005:1993701:1996928:1 gene:PISL3812_06169 gene_biotype:protein_coding transcript_biotype:protein_coding description:60S ribosomal protein L3	0	80.4213	0.0196814	0	2.46383	Ascomycota	Structural constituent of ribosome	UniRef90_R1H169 Putative 60s ribosomal protein l3 protein n=5 Tax=Dothideomycetes incertae sedis TaxID=159987 RepID=R1H169_BOTPV	No hit	0.015686	0	0.999877	No hit	0	0	0
AS_DN77462_c0_g1	KFX52124 cds supercontig:ASM75011v1:scf003:220520:223025:-1 gene:GQ26_0030820 gene_biotype:protein_coding transcript_biotype:protein_coding description:Zinc finger protein	0	89.7561	0	0	2.46244	Ascomycota	NA	UniRef90_B8ME74 C2H2 transcription factor (Seb1), putative n=1 Tax=Talaromyces stipitatus (strain ATCC 10500 / CBS 375.48/ QM 6759 / NRRL 1006) TaxID=441959 RepID=B8ME74_TALSN	No hit	0	0	1	No hit	0	0	0
AS_DN76513_c0_g1	EEA20246 cds supercontig:JCVI-PMFA1-2.0:scf_1105668340738:584834:586589:-1 gene:PMAA_041050 gene_biotype:protein_coding transcript_biotype:protein_coding description:NADH-ubiquinone oxidoreductase, subunit F, putative	2e-148	90.7692	0	0	2.45319	Ascomycota	NA	UniRef90_B8LWK4 NADH dehydrogenase [ubiquinone] flavoprotein 1, mitochondrial n=3 Tax=Talaromyces TaxID=5094 RepID=B8LWK4_TALSN	No hit	0	0	1	No hit	0	gnl|TC-DB|P24917|3.D.1.6.2 NADH-ubiquinone oxidoreductase 51 kDa subunit, mitochondrial - Neurospora crassa.	87.6923
AS_DN11141_c0_g1	KFX41774 cds supercontig:ASM75011v1:scf054:100342:102869:1 gene:GQ26_0540350 gene_biotype:protein_coding transcript_biotype:protein_coding description:AP-1-like transcription factor	0	89.2982	0	0	2.4474	Ascomycota	NA	UniRef90_B8M178 BZIP transcription factor AP-1/Yap1, putative n=1 Tax=Talaromyces stipitatus (strain ATCC 10500 / CBS 375.48/ QM 6759 / NRRL 1006) TaxID=441959 RepID=B8M178_TALSN	No hit	0	0	1	No hit	0	0	0
AS_DN94261_c0_g1	KFX49422 cds supercontig:ASM75011v1:scf009:257123:259795:1 gene:GQ26_0090800 gene_biotype:protein_coding transcript_biotype:protein_coding description:Eukaryotic translation initiation factor 2A	6e-89	80.303	0	0	2.44071	Ascomycota	NA	UniRef90_B8MNG7 Eukaryotic translation initiation factor 2A n=2 Tax=Eurotiales TaxID=5042 RepID=B8MNG7_TALSN	No hit	0	0	1	No hit	0	0	0
AS_DN24181_c0_g1	EEA27497 cds supercontig:JCVI-PMFA1-2.0:scf_1105668340764:2278668:2281055:1 gene:PMAA_023720 gene_biotype:protein_coding transcript_biotype:protein_coding description:zinc knuckle transcription factor/splicing factor MSL5/ZFM1, putative	9e-172	93.2331	0	0	2.43161	Ascomycota	Branchpoint-bridging protein (Fragment)	UniRef90_A0A1L9NBL0 Uncharacterized protein n=1 Tax=Aspergillus tubingensis CBS 134.48 TaxID=767770 RepID=A0A1L9NBL0_ASPTU	No hit	0	0	1	No hit	0	0	0
AS_DN132603_c0_g1	KFX50964 cds supercontig:ASM75011v1:scf006:607846:608874:1 gene:GQ26_0062300 gene_biotype:protein_coding transcript_biotype:protein_coding description:Ribose-phosphate pyrophosphokinase	6e-134	87.2902	0	0	2.43121	Ascomycota	Ribose-phosphate pyrophosphokinase	UniRef90_A0A2H3I4X4 Uncharacterized protein n=1 Tax=Penicillium occitanis TaxID=290292 RepID=A0A2H3I4X4_9EURO	No hit	0	0	1	No hit	0	0	0
AS_DN127324_c0_g1	EEA20940 cds supercontig:JCVI-PMFA1-2.0:scf_1105668340738:2394027:2395878:1 gene:PMAA_047530 gene_biotype:protein_coding transcript_biotype:protein_coding description:40S ribosomal protein S17, putative	2e-132	91.2913	0.0271317	0	2.43039	Ascomycota	Ribosomal protein S17e	UniRef90_B8M8J7 40S ribosomal protein S17, putative n=2 Tax=leotiomyceta TaxID=716546 RepID=B8M8J7_TALSN	No hit	0.021712	0	0.999764	No hit	0	0	0
AS_DN103777_c0_g1	OKL56075 cds supercontig:ASM190759v1:scaffold_15:36667:37738:-1 gene:UA08_08598 gene_biotype:protein_coding transcript_biotype:protein_coding description:40S ribosomal protein S5	2e-67	80.9969	0	0	2.42704	Ascomycota	Ribosomal protein S5	UniRef90_E5A7L8 Similar to 40s ribosomal protein s5 n=7 Tax=leotiomyceta TaxID=716546 RepID=E5A7L8_LEPMJ	No hit	0	0	1	No hit	0	0	0
AS_DN34651_c0_g1	CRG89027 cds supercontig:PIS:WF-38-12_scaffold00005:1662413:1665692:-1 gene:PISL3812_06062 gene_biotype:protein_coding transcript_biotype:protein_coding description:elongation factor EF-3	1e-108	79.2998	0	0	2.42479	Ascomycota	Elongation factor 3	UniRef90_M7SGY6 Putative elongation factor 3 protein n=1 Tax=Eutypa lata (strain UCR-EL1) TaxID=1287681 RepID=M7SGY6_EUTLA	No hit	0	0	1	No hit	0	0	0
AS_DN8130_c0_g1	OKL59658 cds supercontig:ASM190759v1:scaffold_6:1334011:1334688:-1 gene:UA08_05382 gene_biotype:protein_coding transcript_biotype:protein_coding description:40S ribosomal protein S8-A	7e-115	78.5948	0	0	2.42355	Ascomycota	40S ribosomal protein S8	UniRef90_W3WYM4 40S ribosomal protein S8 n=1 Tax=Pestalotiopsis fici (strain W106-1 / CGMCC3.15140) TaxID=1229662 RepID=W3WYM4_PESFW	No hit	0	0	1	No hit	0	0	0
AS_DN21242_c0_g1	KFX41826 cds supercontig:ASM75011v1:scf053:60306:64210:1 gene:GQ26_0530240 gene_biotype:protein_coding transcript_biotype:protein_coding description:Uncharacterized protein	0	87.415	0	0	2.42252	Ascomycota	Bestrophin RFP-TM chloride channel	UniRef90_A0A2H3IWH1 Bestrophin/UPF0187 n=1 Tax=Penicillium occitanis TaxID=290292 RepID=A0A2H3IWH1_9EURO	No hit	0	0	1	No hit	0	gnl|TC-DB|Q5BB29|1.A.46.2.1 Putative uncharacterized protein OS=Emericella nidulans GN=AN2251.2 PE=4 SV=1	76.2755
AS_DN5532_c0_g1	GAM43375 cds supercontig:TcelY94_1.0:DF933843.1:819998:821028:-1 gene:TCE0_047r18132 gene_biotype:protein_coding transcript_biotype:protein_coding description:hypothetical protein	0	88.5936	0	0	2.4214	Ascomycota	NA	UniRef90_A0A2H3INJ9 Uncharacterized protein n=2 Tax=Eurotiales TaxID=5042 RepID=A0A2H3INJ9_9EURO	No hit	0	0	1	No hit	0	0	0
AS_DN100463_c0_g1	EED18630 cds supercontig:JCVI-TSTA1-3.0:scf_1105507295555:3447938:3448986:1 gene:TSTA_123610 gene_biotype:protein_coding transcript_biotype:protein_coding description:sorbitol/xylulose reductase Sou1-like, putative	1e-89	73.183	0	0	2.4194	Ascomycota	NADP-dependent mannitol dehydrogenase	UniRef90_Q0QJJ3 Mannitol dehydrogenase n=12 Tax=leotiomyceta TaxID=716546 RepID=Q0QJJ3_BOTFU	No hit	0	0	1	No hit	0	0	0
AS_DN24656_c0_g1	KFX48718 cds supercontig:ASM75011v1:scf011:326203:330442:1 gene:GQ26_0111070 gene_biotype:protein_coding transcript_biotype:protein_coding description:Protein bli-3	0	89.011	0	0	2.41244	Ascomycota	Blue light-inducible protein Bli-3	UniRef90_B6QBC1 Blue light-inducible protein Bli-3 n=2 Tax=Eurotiales TaxID=5042 RepID=B6QBC1_TALMQ	No hit	0	0	1	No hit	0	0	0
AS_DN125516_c0_g1	KFX42832 cds supercontig:ASM75011v1:scf040:65525:66823:-1 gene:GQ26_0400270 gene_biotype:protein_coding transcript_biotype:protein_coding description:4,5-DOPA dioxygenase extradiol	8e-87	84.4237	0	0	2.40185	Ascomycota	NA	UniRef90_B6QJD0 Aromatic ring-opening dioxygenase LigB subunit, putative n=3 Tax=Eurotiales TaxID=5042 RepID=B6QJD0_TALMQ	No hit	0	0	1	No hit	0	0	0
AS_DN115481_c0_g1	GAM33428 cds supercontig:TcelY94_1.0:DF933800.1:341817:343918:-1 gene:TCE0_004r00312 gene_biotype:protein_coding transcript_biotype:protein_coding description:mitochondrial heat shock protein	3e-121	92.0635	0	0	2.4007	Ascomycota	NA	UniRef90_B8MK05 Antigenic mitochondrial protein HSP60, putative n=3 Tax=Eurotiales TaxID=5042 RepID=B8MK05_TALSN	Hsp60	0	0	1	No hit	0	0	0
AS_DN128160_c0_g1	KFX42143 cds supercontig:ASM75011v1:scf048:46504:50083:-1 gene:GQ26_0480180 gene_biotype:protein_coding transcript_biotype:protein_coding description:Eukaryotic translation initiation factor 5B	2e-127	91.2913	0	0	2.39652	Ascomycota	Eukaryotic translation initiation factor 5B (Fragment)	UniRef90_B8MFI6 Mitochondrial translation initiation factor IF-2, putative n=4 Tax=Eurotiales TaxID=5042 RepID=B8MFI6_TALSN	No hit	0	0	1	No hit	0	0	0
AS_DN73244_c0_g1	KFX46715 cds supercontig:ASM75011v1:scf017:29654:31395:1 gene:GQ26_0170130 gene_biotype:protein_coding transcript_biotype:protein_coding description:hypothetical protein	0	94.274	0	0	2.39172	Ascomycota	NA	UniRef90_A0A2H3ISF0 NYN domain, limkain-b1-type n=1 Tax=Penicillium occitanis TaxID=290292 RepID=A0A2H3ISF0_9EURO	No hit	0	0	1	No hit	0	0	0
AS_DN1316_c0_g1	KFX41283 cds supercontig:ASM75011v1:scf064:24931:26824:1 gene:GQ26_0640100 gene_biotype:protein_coding transcript_biotype:protein_coding description:Nitrate transporter	0	87.5533	0	0	2.38646	Ascomycota	Nitrite extrusion protein nitrite facilitator	UniRef90_B6QCQ9 High affinity nitrate transporter NrtB n=3 Tax=Eurotiales TaxID=5042 RepID=B6QCQ9_TALMQ	No hit	0	0	1	No hit	0	gnl|TC-DB|P22152|2.A.1.8.5 Nitrate transporter (Nitrate permease) - Emericella nidulans (Aspergillus nidulans).	73.4015
AS_DN15898_c0_g1	GAM33292 cds supercontig:TcelY94_1.0:DF933799.1:157271:158294:-1 gene:TCE0_003r00088 gene_biotype:protein_coding transcript_biotype:protein_coding description:60S ribosomal protein	0	99.1453	0	0	2.38366	Ascomycota	Large subunit ribosomal protein L13e	UniRef90_A0A2H3J379 60S ribosomal protein L13 n=1 Tax=Penicillium occitanis TaxID=290292 RepID=A0A2H3J379_9EURO	No hit	0	0	1	No hit	0	0	0
AS_DN69804_c0_g1	GAM43495 cds supercontig:TcelY94_1.0:DF933846.1:381189:382359:1 gene:TCE0_050f18354 gene_biotype:protein_coding transcript_biotype:protein_coding description:37S ribosomal protein	4e-134	95.0495	0	0	2.38331	Ascomycota	40S ribosomal protein S24	UniRef90_A0A093W1H0 40S ribosomal protein S24 (Fragment) n=1 Tax=Talaromyces marneffei PM1 TaxID=1077442 RepID=A0A093W1H0_TALMA	No hit	0	0	1	No hit	0	0	0
AS_DN26335_c0_g1	KFX52246 cds supercontig:ASM75011v1:scf003:464774:467944:1 gene:GQ26_0031670 gene_biotype:protein_coding transcript_biotype:protein_coding description:putative mannosyltransferase KTR4	0	88.6792	0	0	2.38093	Ascomycota	Alpha-mannosyltransferase	UniRef90_B6QLG5 Uncharacterized protein n=5 Tax=Eurotiales TaxID=5042 RepID=B6QLG5_TALMQ	No hit	0	0	1	GT15(2-200)	0	0	0
AS_DN103608_c0_g1	OKL63568 cds supercontig:ASM190759v1:scaffold_1:1753112:1753717:-1 gene:UA08_01692 gene_biotype:protein_coding transcript_biotype:protein_coding description:hypothetical protein	3e-157	88.3117	0	0	2.38001	Ascomycota	Mismatched base pair and cruciform DNA recognition	UniRef90_A0A1Q5QCG9 Uncharacterized protein n=1 Tax=Talaromyces atroroseus TaxID=1441469 RepID=A0A1Q5QCG9_9EURO	No hit	0	0	1	No hit	0	0	0
AS_DN64421_c0_g1	KFX48803 cds supercontig:ASM75011v1:scf011:548956:550246:1 gene:GQ26_0111820 gene_biotype:protein_coding transcript_biotype:protein_coding description:FYVE-type zinc finger-containing protein C9B6.03	0	91.0053	0	0	2.37056	Ascomycota	FYVE zinc finger	UniRef90_B8M3J5 FYVE domain protein, putative n=1 Tax=Talaromyces stipitatus (strain ATCC 10500 / CBS 375.48 / QM 6759 /NRRL 1006) TaxID=441959 RepID=B8M3J5_TALSN	No hit	0	0	1	No hit	0	0	0
AS_DN18198_c0_g1	KFX44846 cds supercontig:ASM75011v1:scf026:304112:305848:-1 gene:GQ26_0261050 gene_biotype:protein_coding transcript_biotype:protein_coding description:Ubiquitin domain-containing protein DSK2	0	88.141	0	0	2.37018	Ascomycota	NA	UniRef90_B6QAD3 Ubiquitin-like protein DskB, putative n=3 Tax=Eurotiales TaxID=5042 RepID=B6QAD3_TALMQ	No hit	0	0	1	No hit	0	0	0
AS_DN138609_c0_g1	GAM37379 cds supercontig:TcelY94_1.0:DF933819.1:514616:515394:-1 gene:TCE0_023r07254 gene_biotype:protein_coding transcript_biotype:protein_coding description:RNA binding protein	2e-147	98	0	0	2.36754	Ascomycota	Translation machinery-associated protein 22	UniRef90_A0A0B8N4V4 RNA binding protein n=1 Tax=Talaromyces cellulolyticus TaxID=1472165 RepID=A0A0B8N4V4_9EURO	No hit	0	0	1	No hit	0	0	0
AS_DN105272_c0_g1	CRG90333 cds supercontig:PIS:WF-38-12_scaffold00007:1805745:1806769:-1 gene:PISL3812_07376 gene_biotype:protein_coding transcript_biotype:protein_coding description:60S ribosomal protein L20-A	6e-95	71.6475	0	0	2.36605	Ascomycota	Ribosomal L18ae protein family	UniRef90_A0A1Y1ZQW9 60S ribosomal protein L20 n=1 Tax=Clohesyomyces aquaticus TaxID=1231657 RepID=A0A1Y1ZQW9_9PLEO	No hit	0	0	1	No hit	0	0	0
AS_DN106237_c0_g1	KFX50566 cds supercontig:ASM75011v1:scf007:682596:684637:1 gene:GQ26_0072490 gene_biotype:protein_coding transcript_biotype:protein_coding description:DNA polymerase epsilon subunit C	3e-146	90.4393	0	0	2.3641	Ascomycota	DNA polymerase epsilon subunit C	UniRef90_A0A2H3I058 Histone-fold n=1 Tax=Penicillium occitanis TaxID=290292 RepID=A0A2H3I058_9EURO	No hit	0	0	1	No hit	0	0	0
AS_DN117173_c0_g1	EEA19696 cds supercontig:JCVI-PMFA1-2.0:scf_1105668340970:1167833:1169651:-1 gene:PMAA_004750 gene_biotype:protein_coding transcript_biotype:protein_coding description:sugar transporter,putative	0	92.0973	0	0	2.36023	Ascomycota	MFS general substrate transporter	UniRef90_B8MNK3 Sugar transporter, putative n=4 Tax=Eurotiales TaxID=5042 RepID=B8MNK3_TALSN	No hit	0	0	1	No hit	0	0	0
AS_DN60403_c0_g1	EEA19743 cds supercontig:JCVI-PMFA1-2.0:scf_1105668340970:1294711:1296469:1 gene:PMAA_005170 gene_biotype:protein_coding transcript_biotype:protein_coding description:protein-L-isoaspartate O-methyltransferase	0	87.2038	0	0	2.34686	Ascomycota	Isoform 2 of protein-L-isoaspartate(D-aspartate) O-methyltransferase	UniRef90_A0A093UNL9 Protein-L-isoaspartate O-methyltransferase n=2 Tax=Talaromyces marneffei TaxID=37727 RepID=A0A093UNL9_TALMA	No hit	0	0	1	No hit	0	0	0
AS_DN118818_c0_g1	EED18119 cds supercontig:JCVI-TSTA1-3.0:scf_1105507295555:2083822:2088172:-1 gene:TSTA_118840 gene_biotype:protein_coding transcript_biotype:protein_coding description:oligomycin resistance ATP-dependent permease yor1, putative	2e-175	80.7531	0	0	2.33968	Ascomycota	ATP-binding-cassette multidrug transporter (Fragment)	UniRef90_B6QG05 Oligomycin resistance ATP-dependent permease yor1, putative n=2 Tax=Talaromyces marneffei TaxID=37727 RepID=B6QG05_TALMQ	No hit	0	0	1	No hit	0	0	0
AS_DN35243_c0_g1	KFX50859 cds supercontig:ASM75011v1:scf006:402201:406171:-1 gene:GQ26_0061470 gene_biotype:protein_coding transcript_biotype:protein_coding description:Phosphoinositide 3-phosphatase	8e-149	78.5714	0	0	2.33794	Ascomycota	RNA binding	UniRef90_A0A2I2G1P2 Uncharacterized protein n=1 Tax=Aspergillus steynii IBT 23096 TaxID=1392250 RepID=A0A2I2G1P2_9EURO	No hit	0	0	1	No hit	0	0	0
AS_DN108258_c0_g1	EEA24170 cds supercontig:JCVI-PMFA1-2.0:scf_1105668340960:1408160:1409527:1 gene:PMAA_081790 gene_biotype:protein_coding transcript_biotype:protein_coding description:60S ribosomal protein L4, putative	4e-139	94.6541	0	0	2.33789	Ascomycota	60S ribosomal protein L4-A	UniRef90_B8MBJ6 60S ribosomal protein L4, putative n=5 Tax=Eurotiales TaxID=5042 RepID=B8MBJ6_TALSN	No hit	0	0	1	No hit	0	0	0
AS_DN92996_c0_g1	KFX52188 cds supercontig:ASM75011v1:scf003:349826:352489:1 gene:GQ26_0031260 gene_biotype:protein_coding transcript_biotype:protein_coding description:Lysophospholipase 1	1e-84	84.1121	0	0	2.33692	Ascomycota	NA	UniRef90_A0A2H3I6U2 Lysophospholipase n=1 Tax=Penicillium occitanis TaxID=290292 RepID=A0A2H3I6U2_9EURO	No hit	0	0	1	No hit	0	0	0
AS_DN37729_c0_g1	OKL57327 cds supercontig:ASM190759v1:scaffold_11:538873:540328:1 gene:UA08_07477 gene_biotype:protein_coding transcript_biotype:protein_coding description:Acyl-CoA desaturase	1e-125	91.5094	0	0	2.32898	Ascomycota	Acyl-CoA desaturase (Fragment)	UniRef90_B8M3X2 Acyl-CoA desaturase n=5 Tax=Eurotiales TaxID=5042 RepID=B8M3X2_TALSN	No hit	0	0	1	No hit	0	0	0
AS_DN117179_c0_g1	KFX49119 cds supercontig:ASM75011v1:scf010:416211:417083:-1 gene:GQ26_0101500 gene_biotype:protein_coding transcript_biotype:protein_coding description:putative peroxiredoxin pmp20	0	91.8651	0	0	2.32353	Ascomycota	Peroxiredoxin	UniRef90_B6Q2J2 Allergen Asp F3 n=3 Tax=Eurotiales TaxID=5042 RepID=B6Q2J2_TALMQ	No hit	0	0	1	No hit	0	0	0
AS_DN62378_c0_g1	CRG91643 cds supercontig:PIS:WF-38-12_scaffold00010:512590:514690:1 gene:PISL3812_08693 gene_biotype:protein_coding transcript_biotype:protein_coding description:F-type H+-transporting ATPase subunit alpha	6e-145	80.6706	0	0	2.32231	Ascomycota	F-type H+-transporting ATPase subunit alpha	UniRef90_C4JIV7 ATP synthase F1, alpha subunit n=2 Tax=Onygenales TaxID=33183 RepID=C4JIV7_UNCRE	No hit	0	0	1	No hit	0	gnl|TC-DB|P07251|3.A.2.1.3 ATP synthase alpha chain, mitochondrial precursor (EC 3.6.1.34) - Saccharomyces cerevisiae (Baker's yeast).	96.4497
AS_DN78824_c0_g1	KFX43457 cds supercontig:ASM75011v1:scf035:130210:133304:-1 gene:GQ26_0350530 gene_biotype:protein_coding transcript_biotype:protein_coding description:Casein kinase I like hhp1	5e-139	94.1358	0	0	2.32173	Ascomycota	NA	UniRef90_A0A1J7IVY5 Kinase-like protein n=1 Tax=Coniochaeta ligniaria NRRL 30616 TaxID=1408157 RepID=A0A1J7IVY5_9PEZI	No hit	0	0	1	No hit	0	0	0
AS_DN122683_c0_g1	KFX46769 cds supercontig:ASM75011v1:scf017:130070:133751:-1 gene:GQ26_0170500 gene_biotype:protein_coding transcript_biotype:protein_coding description:Cell division control protein 4	1e-105	89.4389	0	0	2.31709	Ascomycota	Putative Cell division control protein 4	UniRef90_B6QDJ0 Cell division control protein Cdc4, putative n=4 Tax=Eurotiales TaxID=5042 RepID=B6QDJ0_TALMQ	No hit	0	0	1	No hit	0	0	0
AS_DN14915_c0_g1	KFX44897 cds supercontig:ASM75011v1:scf025:50495:52631:1 gene:GQ26_0250170 gene_biotype:protein_coding transcript_biotype:protein_coding description:putative MFS-type transporter	0	87.3457	0	0	2.31567	Ascomycota	NA	UniRef90_A0A2H3I1C2 Major facilitator superfamily domain, general substrate transporter n=1 Tax=Penicillium occitanis TaxID=290292 RepID=A0A2H3I1C2_9EURO	No hit	0	0	1	No hit	0	0	0
AS_DN118715_c0_g1	EED22009 cds supercontig:JCVI-TSTA1-3.0:scf_1105507295527:3329768:3330744:-1 gene:TSTA_092540 gene_biotype:protein_coding transcript_biotype:protein_coding description:solid-state culture expressed protein (Aos23), putative	8e-124	81.8008	0.0375267	0	2.31476	Ascomycota	3-deoxy-manno-octulosonate cytidylyltransferase	UniRef90_A0A2H3IKH1 Uncharacterized protein n=1 Tax=Penicillium occitanis TaxID=290292 RepID=A0A2H3IKH1_9EURO	No hit	0.0307266	0	0.999528	No hit	0	0	0
AS_DN92978_c0_g1	KFX43163 cds supercontig:ASM75011v1:scf037:57293:59380:-1 gene:GQ26_0370220 gene_biotype:protein_coding transcript_biotype:protein_coding description:Uncharacterized protein	6e-94	80.6616	0	0	2.31298	Ascomycota	NA	UniRef90_B8MRC6 Uncharacterized protein n=4 Tax=Eurotiales TaxID=5042 RepID=B8MRC6_TALSN	No hit	0	0	1	No hit	0	0	0
AS_DN92141_c0_g1	KFX45035 cds supercontig:ASM75011v1:scf025:315096:316894:1 gene:GQ26_0251230 gene_biotype:protein_coding transcript_biotype:protein_coding description:Protein AIM2	7e-110	79.9645	0	0	2.31261	Ascomycota	Dienelactone hydrolase	UniRef90_A0A2H3IEK5 Dienelactone hydrolase n=4 Tax=Eurotiales TaxID=5042 RepID=A0A2H3IEK5_9EURO	No hit	0	0	1	No hit	0	0	0
AS_DN9497_c0_g1	OKL63497 cds supercontig:ASM190759v1:scaffold_1:1382556:1383194:-1 gene:UA08_01554 gene_biotype:protein_coding transcript_biotype:protein_coding description:hypothetical protein	3e-162	84.7619	0.016096	0	2.30261	Ascomycota	Pathogenesis associated protein Cap20	UniRef90_A0A1Q5QC18 Uncharacterized protein n=1 Tax=Talaromyces atroroseus TaxID=1441469 RepID=A0A1Q5QC18_9EURO	No hit	0.0133642	0	0.999911	No hit	0	0	0
AS_DN70379_c0_g1	EEA24470 cds supercontig:JCVI-PMFA1-2.0:scf_1105668340960:2204672:2207580:1 gene:PMAA_084720 gene_biotype:protein_coding transcript_biotype:protein_coding description:carbamoyl-phosphate synthase, small subunit	6e-164	91.7874	0	0	2.29976	Ascomycota	NA	UniRef90_B8MBT1 Carbamoyl-phosphate synthase, small subunit n=4 Tax=Eurotiales TaxID=5042 RepID=B8MBT1_TALSN	No hit	0	0	1	No hit	0	0	0
AS_DN111036_c0_g1	CRG86229 cds supercontig:PIS:WF-38-12_scaffold00002:4037698:4038470:1 gene:PISL3812_03232 gene_biotype:protein_coding transcript_biotype:protein_coding description:60S ribosomal protein L24	2e-74	78.0093	0	0	2.29671	Ascomycota	Ribosomal protein L24e-domain-containing protein	UniRef90_A0A1E2Y358 60S ribosomal protein L24 n=2 Tax=Paracoccidioides brasiliensis TaxID=121759 RepID=A0A1E2Y358_PARBR	No hit	0	0	1	No hit	0	0	0
AS_DN68063_c0_g1	KFX43773 cds supercontig:ASM75011v1:scf033:300324:301507:-1 gene:GQ26_0330950 gene_biotype:protein_coding transcript_biotype:protein_coding description:Ubiquitin and WLM domain-containing protein	2e-73	79.7386	0	0	2.29478	Ascomycota	NA	UniRef90_A0A2H3J6W1 WLM n=1 Tax=Penicillium occitanis TaxID=290292 RepID=A0A2H3J6W1_9EURO	No hit	0	0	1	No hit	0	0	0
AS_DN8952_c0_g1	OKL63498 cds supercontig:ASM190759v1:scaffold_1:1385194:1385918:-1 gene:UA08_01555 gene_biotype:protein_coding transcript_biotype:protein_coding description:60S ribosomal protein L27-A	7e-79	70.5882	0	0	2.29371	Ascomycota	Large subunit ribosomal protein L27e	UniRef90_K2RSP9 60S ribosomal protein L27 n=12 Tax=leotiomyceta TaxID=716546 RepID=K2RSP9_MACPH	No hit	0	0	1	No hit	0	0	0
AS_DN66047_c0_g1	KFX47195 cds supercontig:ASM75011v1:scf016:573419:582208:1 gene:GQ26_0162130 gene_biotype:protein_coding transcript_biotype:protein_coding description:putative DNA-binding protein creA	4e-114	91.8367	0	0	2.29009	Ascomycota	NA	UniRef90_W6JMP1 CreA protein n=7 Tax=Eurotiales TaxID=5042 RepID=W6JMP1_9EURO	No hit	0	0	1	No hit	0	0	0
AS_DN100560_c0_g1	OKL63035 cds supercontig:ASM190759v1:scaffold_1:2440911:2442125:-1 gene:UA08_01930 gene_biotype:protein_coding transcript_biotype:protein_coding description:40S ribosomal protein S4	0	82.684	0	0	2.2862	Ascomycota	40S ribosomal protein S4	UniRef90_C8VAM4 40S ribosomal protein S4 n=53 Tax=Aspergillaceae TaxID=1131492 RepID=C8VAM4_EMENI	No hit	0	0	1	No hit	0	0	0
AS_DN34921_c0_g1	KFX50664 cds supercontig:ASM75011v1:scf007:890507:894178:-1 gene:GQ26_0073210 gene_biotype:protein_coding transcript_biotype:protein_coding description:Grainyhead-like protein 2 like	0	90.0691	0	0	2.28503	Ascomycota	NA	UniRef90_B8M5M5 CP2 transcription factor, putative n=1 Tax=Talaromyces stipitatus (strain ATCC 10500 / CBS 375.48 / QM 6759/ NRRL 1006) TaxID=441959 RepID=B8M5M5_TALSN	No hit	0	0	1	No hit	0	0	0
AS_DN17614_c0_g1	OKL63832 cds supercontig:ASM190759v1:scaffold_0:2203501:2206008:-1 gene:UA08_00776 gene_biotype:protein_coding transcript_biotype:protein_coding description:Heat shock protein hsp88	2e-149	83.5443	0	0	2.28147	Ascomycota	NA	UniRef90_A0A017S5X5 Heat shock protein Hsp88 n=3 Tax=Aspergillus TaxID=5052 RepID=A0A017S5X5_9EURO	Hsp70	0	0	1	No hit	0	0	0
AS_DN134106_c0_g1	GAM40336 cds supercontig:TcelY94_1.0:DF933834.1:665354:668497:-1 gene:TCE0_038r12609 gene_biotype:protein_coding transcript_biotype:protein_coding description:P-type H+-ATPase	1e-140	93.4524	0	0	2.27769	Ascomycota	NA	UniRef90_A0A0U1M8C7 Plasma membrane ATPase n=7 Tax=Eurotiales TaxID=5042 RepID=A0A0U1M8C7_TALIS	No hit	0	0	1	No hit	0	0	0
AS_DN14946_c0_g1	EEA19534 cds supercontig:JCVI-PMFA1-2.0:scf_1105668340970:744439:748639:-1 gene:PMAA_003220 gene_biotype:protein_coding transcript_biotype:protein_coding description:cytoskeleton assembly control protein Sla2, putative	0	89.0741	0	0	2.2758	Ascomycota	Cytoskeleton assembly control protein (Fragment)	UniRef90_B8MMU1 Cytoskeleton assembly control protein Sla2, putative n=4 Tax=Eurotiales TaxID=5042 RepID=B8MMU1_TALSN	No hit	0	0	1	No hit	0	0	0
AS_DN130872_c0_g1	OKL56797 cds supercontig:ASM190759v1:scaffold_12:209912:211195:1 gene:UA08_07774 gene_biotype:protein_coding transcript_biotype:protein_coding description:hypothetical protein	0	85.8407	0	0	2.27007	Ascomycota	Cysteine sulfinate desulfinase	UniRef90_A0A225ATK6 Uncharacterized protein n=1 Tax=Talaromyces atroroseus TaxID=1441469 RepID=A0A225ATK6_9EURO	No hit	0	0	1	No hit	0	0	0
AS_DN17129_c0_g1	CRG91429 cds supercontig:PIS:WF-38-12_scaffold00009:1510225:1512496:-1 gene:PISL3812_08477 gene_biotype:protein_coding transcript_biotype:protein_coding description:Heat shock 70 kDa protein	1e-65	80.719	0	0	2.27007	Ascomycota	Heat shock protein 70 (Fragment)	UniRef90_A9XAN7 Heat shock protein Hsp70 (Fragment) n=1 Tax=Glomerella acutata TaxID=27357 RepID=A9XAN7_GLOAC	Hsp70	0	0	1	No hit	0	gnl|TC-DB|P0A6Y8|1.A.33.1.2 Chaperone protein dnaK - Escherichia coli.	85.2941
AS_DN74001_c0_g1	KFX41915 cds supercontig:ASM75011v1:scf052:134825:138115:-1 gene:GQ26_0520490 gene_biotype:protein_coding transcript_biotype:protein_coding description:ZZ-type zinc finger-containing protein P35G2.11c	0	83.758	0	0	2.26632	Ascomycota	Next to BRCA1 protein 1 protein	UniRef90_A0A2H3I6H6 Zinc finger, ZZ-type n=1 Tax=Penicillium occitanis TaxID=290292 RepID=A0A2H3I6H6_9EURO	No hit	0	0	1	No hit	0	0	0
AS_DN112459_c0_g1	KFX45180 cds supercontig:ASM75011v1:scf024:103836:107405:-1 gene:GQ26_0240370 gene_biotype:protein_coding transcript_biotype:protein_coding description:Glutamine--fructose-6-phosphate aminotransferase [isomerizing]	2e-147	95.0617	0	0	2.26557	Ascomycota	NA	UniRef90_B8M7D3 Glucosamine-fructose-6-phosphate aminotransferase n=54 Tax=Eurotiomycetidae TaxID=451871 RepID=B8M7D3_TALSN	No hit	0	0	1	No hit	0	0	0
AS_DN60156_c0_g1	KFX44649 cds supercontig:ASM75011v1:scf027:212643:214599:-1 gene:GQ26_0270810 gene_biotype:protein_coding transcript_biotype:protein_coding description:Pre-mRNA-splicing factor slt11	0	86.7265	0	0	2.26328	Ascomycota	Pre-mRNA-splicing factor	UniRef90_A0A0B8N4I6 Uncharacterized protein n=1 Tax=Talaromyces cellulolyticus TaxID=1472165 RepID=A0A0B8N4I6_9EURO	No hit	0	0	1	No hit	0	0	0
AS_DN90511_c0_g1	EEA19667 cds supercontig:JCVI-PMFA1-2.0:scf_1105668340970:1073643:1075258:1 gene:PMAA_004460 gene_biotype:protein_coding transcript_biotype:protein_coding description:IFRD domain protein	0	86.1397	0	0	2.24936	Ascomycota	IFRD domain-containing protein	UniRef90_B6QTA2 IFRD domain protein n=2 Tax=Eurotiales TaxID=5042 RepID=B6QTA2_TALMQ	No hit	0	0	1	No hit	0	0	0
AS_DN14433_c0_g1	EEA21673 cds supercontig:JCVI-PMFA1-2.0:scf_1105668340984:1247507:1250489:1 gene:PMAA_054700 gene_biotype:protein_coding transcript_biotype:protein_coding description:polyadenylate-binding protein	3e-136	91.4286	0	0	2.24414	Ascomycota	NA	UniRef90_B8MGJ6 Polyadenylate-binding protein n=4 Tax=Eurotiales TaxID=5042 RepID=B8MGJ6_TALSN	No hit	0	0	1	No hit	0	0	0
AS_DN114755_c0_g1	EED19961 cds supercontig:JCVI-TSTA1-3.0:scf_1105507295541:2420146:2421584:1 gene:TSTA_032190 gene_biotype:protein_coding transcript_biotype:protein_coding description:40S ribosomal protein S7e	3e-125	91.9872	0	0	2.24148	Ascomycota	NA	No hits	No hit	0	0	1	No hit	0	0	0
AS_DN107606_c0_g1	CRG83199 cds supercontig:PIS:WF-38-12_scaffold00001:1861906:1863876:-1 gene:PISL3812_00549 gene_biotype:protein_coding transcript_biotype:protein_coding description:Heat shock 70 kDa protein	2e-108	84.359	0.0395873	0	2.24026	Ascomycota	NA	UniRef90_A0A0G2EA49 Putative hsp70-like protein n=1 Tax=Diplodia seriata TaxID=420778 RepID=A0A0G2EA49_9PEZI	Hsp70	0.0330052	0	0.999455	No hit	0	gnl|TC-DB|P08107|1.A.33.1.3 Heat shock 70 kDa protein 1 (HSP70.1) (HSP70-1/HSP70-2) - Homo sapiens (Human).	92.3077
AS_DN2518_c0_g1	KFX41288 cds supercontig:ASM75011v1:scf064:34566:35916:1 gene:GQ26_0640160 gene_biotype:protein_coding transcript_biotype:protein_coding description:60S ribosomal protein L5	1e-129	93.4641	0	0	2.23925	Ascomycota	NA	UniRef90_B8M2C6 60S ribosomal protein L5, putative n=4 Tax=Talaromyces TaxID=5094 RepID=B8M2C6_TALSN	No hit	0	0	1	No hit	0	0	0
AS_DN82709_c0_g1	KFX49253 cds supercontig:ASM75011v1:scf010:709586:713050:-1 gene:GQ26_0102490 gene_biotype:protein_coding transcript_biotype:protein_coding description:CBL-interacting protein kinase 4	1e-30	79.2049	0	0	2.23881	Ascomycota	NA	UniRef90_A0A2H3J4G3 Uncharacterized protein n=1 Tax=Penicillium occitanis TaxID=290292 RepID=A0A2H3J4G3_9EURO	No hit	0	0	1	No hit	0	0	0
AS_DN22511_c0_g1	EED22845 cds supercontig:JCVI-TSTA1-3.0:scf_1105507295523:1105047:1108337:1 gene:TSTA_063270 gene_biotype:protein_coding transcript_biotype:protein_coding description:cell division control protein Cdc48	2e-72	78.1711	0	0	2.23326	Ascomycota	NA	UniRef90_M3B5I3 Cell division control protein n=33 Tax=Eukaryota TaxID=2759 RepID=M3B5I3_SPHMS	Hsp100	0	0	1	No hit	0	gnl|TC-DB|P25694|3.A.16.1.2 Cell division control protein 48 - Saccharomyces cerevisiae (Baker's yeast).	95.5752
AS_DN32336_c0_g1	OKL60265 cds supercontig:ASM190759v1:scaffold_5:1170487:1171227:-1 gene:UA08_04858 gene_biotype:protein_coding transcript_biotype:protein_coding description:Inorganic phosphate transport protein PHO88	0	87.5676	0	0	2.2304	Ascomycota	Inorganic phosphate transporter	UniRef90_A0A225B0L3 Inorganic phosphate transport protein PHO88 n=1 Tax=Talaromyces atroroseus TaxID=1441469 RepID=A0A225B0L3_9EURO	No hit	0	0	1	No hit	0	0	0
AS_DN35998_c0_g1	CRG83096 cds supercontig:PIS:WF-38-12_scaffold00001:1504708:1506673:-1 gene:PISL3812_00444 gene_biotype:protein_coding transcript_biotype:protein_coding description:NADH dehydrogenase	0	77.6973	0	0	2.229	Ascomycota	FAD-dependent pyridine nucleotide-disulphide oxidoreductase	UniRef90_K2S122 Uncharacterized protein n=4 Tax=Botryosphaeriaceae TaxID=45131 RepID=K2S122_MACPH	No hit	0	0	1	No hit	0	0	0
AS_DN60158_c0_g1	GAM42075 cds supercontig:TcelY94_1.0:DF933839.1:450309:451013:-1 gene:TCE0_043r15720 gene_biotype:protein_coding transcript_biotype:protein_coding description:cold shock-induced protein	0	97.7305	0	0	2.22568	Ascomycota	Cold shock-induced protein TIR2, putative	UniRef90_A0A2H3IPM4 Uncharacterized protein n=2 Tax=Eurotiales TaxID=5042 RepID=A0A2H3IPM4_9EURO	No hit	0	0	1	No hit	SP(Sec/SPI)	0	0
AS_DN103542_c0_g1	GAM33447 cds supercontig:TcelY94_1.0:DF933800.1:399146:401128:1 gene:TCE0_004f00345 gene_biotype:protein_coding transcript_biotype:protein_coding description:F1-ATPase beta subunit	5e-179	98.3193	0.039057	0	2.22195	Ascomycota	NA	UniRef90_B6QIQ4 ATP synthase subunit beta n=12 Tax=Eurotiomycetes TaxID=147545 RepID=B6QIQ4_TALMQ	No hit	0.0327295	0	0.999464	No hit	0	gnl|TC-DB|P00830|3.A.2.1.3 ATP SYNTHASE BETA CHAIN, MITOCHONDRIAL PRECURSOR (EC 3.6.1.34) - Saccharomyces cerevisiae (Baker's yeast).	92.437
AS_DN119240_c0_g1	KFX43539 cds supercontig:ASM75011v1:scf034:42343:44388:1 gene:GQ26_0340130 gene_biotype:protein_coding transcript_biotype:protein_coding description:putative NAD(P)H-dependent D-xylose reductase xyl1	3e-147	87.8378	0	0	2.21749	Ascomycota	4-dihydromethyltrisporate dehydrogenase (Fragment)	UniRef90_B6QKH3 D-xylose reductase (Xyl1), putative n=3 Tax=Eurotiales TaxID=5042 RepID=B6QKH3_TALMQ	No hit	0	0	1	No hit	0	0	0
AS_DN63599_c0_g1	KFX46141 cds supercontig:ASM75011v1:scf020:303075:305537:1 gene:GQ26_0201130 gene_biotype:protein_coding transcript_biotype:protein_coding description:Eukaryotic translation initiation factor 3 subunit J	1e-105	85.9944	0	0	2.2149	Ascomycota	Translation initiation factor 3 subunit J	UniRef90_A0A017ST76 Eukaryotic translation initiation factor 3 subunit J n=3 Tax=Aspergillus TaxID=5052 RepID=A0A017ST76_9EURO	No hit	0	0	1	No hit	0	0	0
AS_DN132349_c0_g1	GAM43261 cds supercontig:TcelY94_1.0:DF933843.1:488679:489684:1 gene:TCE0_047f17929 gene_biotype:protein_coding transcript_biotype:protein_coding description:iron-sulfur protein subunit of succinate dehydrogenase	9e-115	71.805	0	0	2.21133	Ascomycota	Succinate dehydrogenase [ubiquinone] iron-sulfur subunit, mitochondrial	UniRef90_R7YXR2 Succinate dehydrogenase [ubiquinone] iron-sulfur subunit, mitochondrial n=1 Tax=Coniosporium apollinis (strain CBS 100218) TaxID=1168221 RepID=R7YXR2_CONA1	No hit	0	0	1	No hit	0	gnl|TC-DB|P21912|3.D.10.1.7 Succinate dehydrogenase [ubiquinone] iron-sulfur subunit, mitochondrial OS=Homo sapiens OX=9606 GN=SDHB PE=1 SV=3	77.0751
AS_DN88431_c0_g1	KFX49580 cds supercontig:ASM75011v1:scf009:541573:542243:1 gene:GQ26_0091910 gene_biotype:protein_coding transcript_biotype:protein_coding description:40S ribosomal protein S4	1e-109	82.0513	0.0846003	0	2.20932	Ascomycota	40S ribosomal protein S4-B (Fragment)	UniRef90_Q0V6X3 40S ribosomal protein S4 n=18 Tax=Pleosporales TaxID=92860 RepID=Q0V6X3_PHANO	No hit	0.0694779	0	0.997583	No hit	0	0	0
AS_DN22027_c0_g1	KFX45131 cds supercontig:ASM75011v1:scf024:5220:6235:-1 gene:GQ26_0240040 gene_biotype:protein_coding transcript_biotype:protein_coding description:ATP synthase gamma chain	0	88.0819	0	0	2.20804	Ascomycota	ATP synthase gamma chain	UniRef90_B6QRJ7 Uncharacterized protein n=3 Tax=Eurotiales TaxID=5042 RepID=B6QRJ7_TALMQ	No hit	0	0	1	No hit	0	0	0
AS_DN1435_c0_g1	KFX44431 cds supercontig:ASM75011v1:scf028:84486:85899:1 gene:GQ26_0280310 gene_biotype:protein_coding transcript_biotype:protein_coding description:Eukaryotic translation initiation factor 6	3e-130	91.1111	0.0486103	0	2.20199	Ascomycota	Translation initiation factor eIF-6 (Fragment)	UniRef90_A0A093VCM7 Eukaryotic translation initiation factor 6 n=2 Tax=Talaromyces TaxID=5094 RepID=A0A093VCM7_TALMA	No hit	0.0407522	0	0.999169	No hit	0	0	0
AS_DN75084_c0_g1	KFX49477 cds supercontig:ASM75011v1:scf009:356103:356793:-1 gene:GQ26_0091190 gene_biotype:protein_coding transcript_biotype:protein_coding description:Mitochondrial intermembrane space cysteine motif-containing protein MIC17	2e-179	80.2139	0	0	2.19453	Ascomycota	Mitochondrial intermembrane space cysteine motif-containing protein MIC17	UniRef90_B6QTE7 CHCH domain protein n=3 Tax=Eurotiales TaxID=5042 RepID=B6QTE7_TALMQ	No hit	0	0	1	No hit	0	0	0
AS_DN79649_c0_g1	KFX42339 cds supercontig:ASM75011v1:scf046:154408:156587:1 gene:GQ26_0460660 gene_biotype:protein_coding transcript_biotype:protein_coding description:Proton-coupled folate transporter	0	85.5556	0	0	2.18298	Ascomycota	NA	UniRef90_A0A093UX70 Proton-coupled folate transporter n=2 Tax=Talaromyces marneffei TaxID=37727 RepID=A0A093UX70_TALMA	No hit	0	0	1	No hit	0	0	0
AS_DN107613_c0_g1	EEA20723 cds supercontig:JCVI-PMFA1-2.0:scf_1105668340738:1792376:1795499:1 gene:PMAA_045460 gene_biotype:protein_coding transcript_biotype:protein_coding description:IQ calmodulin-binding motif domain protein	1e-115	85.1319	0	0	2.18076	Ascomycota	NA	UniRef90_A0A2H3ILQ7 T-complex 11 n=1 Tax=Penicillium occitanis TaxID=290292 RepID=A0A2H3ILQ7_9EURO	No hit	0	0	1	No hit	0	0	0
AS_DN105850_c0_g1	KFX43371 cds supercontig:ASM75011v1:scf036:229952:233209:-1 gene:GQ26_0360880 gene_biotype:protein_coding transcript_biotype:protein_coding description:S-adenosylmethionine decarboxylase proenzyme	6e-179	92.2902	0	0	2.17445	Ascomycota	NA	UniRef90_B8MDM0 S-adenosylmethionine decarboxylase proenzyme n=3 Tax=Eurotiales TaxID=5042 RepID=B8MDM0_TALSN	No hit	0	0	1	No hit	0	0	0
AS_DN115727_c0_g1	KFX43410 cds supercontig:ASM75011v1:scf035:32785:34595:-1 gene:GQ26_0350140 gene_biotype:protein_coding transcript_biotype:protein_coding description:Serine hydroxymethyltransferase,cytosolic	2e-137	90.4348	0	0	2.17399	Ascomycota	NA	UniRef90_B8M705 Serine hydroxymethyltransferase n=5 Tax=Eurotiales TaxID=5042 RepID=B8M705_TALSN	No hit	0	0	1	No hit	0	0	0
AS_DN98369_c0_g1	KFX48766 cds supercontig:ASM75011v1:scf011:450739:451885:1 gene:GQ26_0111500 gene_biotype:protein_coding transcript_biotype:protein_coding description:Translationally-controlled tumor protein like	6e-123	79.4203	0.0488103	0	2.17398	Ascomycota	NA	No hits	No hit	0.0412264	0	0.99915	No hit	0	0	0
AS_DN128365_c0_g1	KFX47901 cds supercontig:ASM75011v1:scf013:18601:19511:1 gene:GQ26_0130080 gene_biotype:protein_coding transcript_biotype:protein_coding description:Fatty acid-binding protein	4e-135	89.6825	0	0	2.16662	Ascomycota	Lipid transfer	UniRef90_B6QD90 Lipid transfer protein, putative n=3 Tax=Talaromyces marneffei TaxID=37727 RepID=B6QD90_TALMQ	No hit	0	0	1	No hit	0	0	0
AS_DN66694_c0_g1	EEA25750 cds supercontig:JCVI-PMFA1-2.0:scf_1105668340758:1779781:1781670:-1 gene:PMAA_068450 gene_biotype:protein_coding transcript_biotype:protein_coding description:oleate delta-12 desaturase	0	91.1411	0	0	2.15779	Ascomycota	Similar to Delta(12) fatty acid desaturase	UniRef90_B6Q8E6 Oleate delta-12 desaturase n=5 Tax=Eurotiales TaxID=5042 RepID=B6Q8E6_TALMQ	No hit	0	0	1	No hit	0	0	0
AS_DN32582_c1_g1	KFX43922 cds supercontig:ASM75011v1:scf031:13816:14835:1 gene:GQ26_0310030 gene_biotype:protein_coding transcript_biotype:protein_coding description:40S ribosomal protein S22	5e-139	88.9831	0.129561	0.0629075	2.15331	Ascomycota	Structural constituent of ribosome	UniRef90_C5P887 40S ribosomal protein S22, putative n=172 Tax=Eukaryota TaxID=2759 RepID=C5P887_COCP7	No hit	0.105342	0.0527521	0.993036	No hit	0	0	0
AS_DN115263_c0_g1	KFX48482 cds supercontig:ASM75011v1:scf012:527747:530321:-1 gene:GQ26_0121910 gene_biotype:protein_coding transcript_biotype:protein_coding description:40S ribosomal protein S6-A	0	95.1338	0	0	2.15065	Ascomycota	Ribosomal gene product S6B	UniRef90_A0A232LY39 40S ribosomal protein S6 n=1 Tax=Elaphomyces granulatus TaxID=519963 RepID=A0A232LY39_9EURO	No hit	0	0	1	No hit	0	0	0
AS_DN128475_c0_g1	KFX42346 cds supercontig:ASM75011v1:scf045:11462:15422:1 gene:GQ26_0450040 gene_biotype:protein_coding transcript_biotype:protein_coding description:Serine/threonine-protein kinase ppk4	3e-177	93.1442	0	0	2.14775	Ascomycota	Serine/threonine-protein kinase/endoribonuclease IRE1	UniRef90_B8MIB0 Protein kinase and ribonuclease Ire1, putative n=5 Tax=Eurotiales TaxID=5042 RepID=B8MIB0_TALSN	No hit	0	0	1	No hit	0	0	0
AS_DN35821_c0_g1	GAM40173 cds supercontig:TcelY94_1.0:DF933834.1:97108:101488:-1 gene:TCE0_038r12307 gene_biotype:protein_coding transcript_biotype:protein_coding description:CorA family magnesium ion transporter	0	92.0271	0	0	2.14621	Ascomycota	Magnesium transporter ALR1	UniRef90_B8MC14 CorA family metal ion transporter, putative n=1 Tax=Talaromyces stipitatus (strain ATCC 10500 / CBS 375.48/ QM 6759 / NRRL 1006) TaxID=441959 RepID=B8MC14_TALSN	No hit	0	0	1	No hit	0	0	0
AS_DN2452_c0_g1	EED14588 cds supercontig:JCVI-TSTA1-3.0:scf_1105507295515:93290:94207:1 gene:TSTA_040680 gene_biotype:protein_coding transcript_biotype:protein_coding description:40S ribosomal protein S10a	2e-68	81.1966	0	0.021879	2.14443	Ascomycota	Structural constituent of ribosome	UniRef90_A0A094ADV1 Uncharacterized protein n=24 Tax=Pezizomycotina TaxID=147538 RepID=A0A094ADV1_9PEZI	No hit	0	0.0188884	0.999822	No hit	0	0	0
AS_DN87264_c0_g1	KFX46543 cds supercontig:ASM75011v1:scf018:131212:133674:1 gene:GQ26_0180440 gene_biotype:protein_coding transcript_biotype:protein_coding description:Eukaryotic translation initiation factor 3 subunit D	0	90.535	0	0	2.13828	Ascomycota	Eukaryotic translation initiation factor 3 subunit D	UniRef90_A0A0U1M9I4 Eukaryotic translation initiation factor 3 subunit D n=1 Tax=Talaromyces islandicus TaxID=28573 RepID=A0A0U1M9I4_TALIS	No hit	0	0	1	No hit	0	0	0
AS_DN32670_c0_g1	KFX48512 cds supercontig:ASM75011v1:scf012:595553:602320:1 gene:GQ26_0122130 gene_biotype:protein_coding transcript_biotype:protein_coding description:Nucleoporin	0	85.012	0	0	2.13503	Ascomycota	NA	UniRef90_B6QQD0 Nucleoporin SONB, putative n=4 Tax=Eurotiales TaxID=5042 RepID=B6QQD0_TALMQ	No hit	0	0	1	No hit	0	0	0
AS_DN129797_c0_g1	GAM43154 cds supercontig:TcelY94_1.0:DF933843.1:164112:168877:-1 gene:TCE0_047r17732 gene_biotype:protein_coding transcript_biotype:protein_coding description:NF-X1 finger transcription factor	1e-175	96.4481	0	0	2.13405	Ascomycota	NA	UniRef90_A0A2H3IGW9 Single-stranded nucleic acid binding R3H n=1 Tax=Penicillium occitanis TaxID=290292 RepID=A0A2H3IGW9_9EURO	No hit	0	0	1	No hit	0	0	0
AS_DN65095_c0_g1	KFX51945 cds supercontig:ASM75011v1:scf004:815834:819679:-1 gene:GQ26_0042990 gene_biotype:protein_coding transcript_biotype:protein_coding description:Heat shock 70 kDa protein	8e-84	74.4186	0	0	2.12973	Ascomycota	Heat shock protein 70	UniRef90_Q0U3T1 Uncharacterized protein n=19 Tax=Dothideomycetes TaxID=147541 RepID=Q0U3T1_PHANO	Hsp70	0	0	1	No hit	0	0	0
AS_DN127054_c0_g1	OKL56553 cds supercontig:ASM190759v1:scaffold_13:882344:883760:1 gene:UA08_08343 gene_biotype:protein_coding transcript_biotype:protein_coding description:putative glycosidase crf2	1e-137	81.2207	0	0	2.12869	Ascomycota	NA	UniRef90_A0A225ACF8 Putative glycosidase crf2 n=1 Tax=Talaromyces atroroseus TaxID=1441469 RepID=A0A225ACF8_9EURO	No hit	0	0	1	GH16(23)	0	0	0
AS_DN120279_c0_g1	GAM40169 cds supercontig:TcelY94_1.0:DF933834.1:81847:82408:1 gene:TCE0_038f12303 gene_biotype:protein_coding transcript_biotype:protein_coding description:ubiquitin ligase subunit	1e-180	98.0716	0	0	2.12853	Ascomycota	Ubiquitin ligase subunit HrtA	UniRef90_B6QGU6 Ubiquitin ligase subunit HrtA, putative n=2 Tax=Talaromyces marneffei TaxID=37727 RepID=B6QGU6_TALMQ	No hit	0	0	1	No hit	0	0	0
AS_DN74527_c0_g1	KFX44421 cds supercontig:ASM75011v1:scf028:54751:59638:-1 gene:GQ26_0280230 gene_biotype:protein_coding transcript_biotype:protein_coding description:Uncharacterized protein	7e-128	88.9831	0	0	2.12372	Ascomycota	NA	UniRef90_B6QGD0 Membrane-spanning ATPase, putative n=3 Tax=Eurotiales TaxID=5042 RepID=B6QGD0_TALMQ	No hit	0	0	1	No hit	0	0	0
AS_DN13868_c0_g1	GAM43474 cds supercontig:TcelY94_1.0:DF933846.1:300429:306941:1 gene:TCE0_050f18316 gene_biotype:protein_coding transcript_biotype:protein_coding description:DNA-directed RNA polymerase II complex subunit	0	98.0645	0	0.0169615	2.12228	Ascomycota	DNA-directed RNA polymerase II 138 kDa polypeptide	UniRef90_B8MU25 DNA-directed RNA polymerase subunit beta n=15 Tax=Eurotiales TaxID=5042 RepID=B8MU25_TALSN	No hit	0	0.0147707	0.999891	No hit	0	0	0
AS_DN114190_c0_g1	KFX48570 cds supercontig:ASM75011v1:scf012:729498:731600:1 gene:GQ26_0122560 gene_biotype:protein_coding transcript_biotype:protein_coding description:Superoxide dismutase [Mn] 3.1,mitochondrial	4e-170	92.8922	0	0	2.1083	Ascomycota	Superoxide dismutase	UniRef90_A0A2H3JA12 Manganese/iron superoxide dismutase n=1 Tax=Penicillium occitanis TaxID=290292 RepID=A0A2H3JA12_9EURO	No hit	0	0	1	No hit	0	0	0
AS_DN67386_c0_g1	KFX43345 cds supercontig:ASM75011v1:scf036:160739:162596:1 gene:GQ26_0360670 gene_biotype:protein_coding transcript_biotype:protein_coding description:Signal recognition particle 54 kDa protein like	3e-152	88.8889	0	0	2.10806	Ascomycota	NA	UniRef90_A0A232LXU1 Signal recognition particle 54 kDa protein n=1 Tax=Elaphomyces granulatus TaxID=519963 RepID=A0A232LXU1_9EURO	No hit	0	0	1	No hit	0	0	0
AS_DN83402_c0_g1	KFX50099 cds supercontig:ASM75011v1:scf008:687793:689519:1 gene:GQ26_0082590 gene_biotype:protein_coding transcript_biotype:protein_coding description:putative mitochondrial chaperone BCS1-B	2e-92	85.8025	0	0	2.10692	Ascomycota	NA	UniRef90_B6QVH9 Mitochondrial chaperone bcs1, putative n=3 Tax=Eurotiales TaxID=5042 RepID=B6QVH9_TALMQ	No hit	0	0	1	No hit	0	0	0
AS_DN6894_c0_g1	KFX44102 cds supercontig:ASM75011v1:scf030:73297:74441:1 gene:GQ26_0300300 gene_biotype:protein_coding transcript_biotype:protein_coding description:putative membrane protein	6e-139	87.2685	0	0	2.10347	Ascomycota	NA	UniRef90_B6QA68 Uncharacterized protein n=3 Tax=Eurotiales TaxID=5042 RepID=B6QA68_TALMQ	No hit	0	0	1	No hit	0	0	0
AS_DN62433_c0_g1	EEA24141 cds supercontig:JCVI-PMFA1-2.0:scf_1105668340960:1323379:1324497:-1 gene:PMAA_081510 gene_biotype:protein_coding transcript_biotype:protein_coding description:catechol dioxygenase,putative	0	91.3502	0	0	2.09492	Ascomycota	NA	UniRef90_B8MAU8 Catechol dioxygenase, putative n=3 Tax=Eurotiales TaxID=5042 RepID=B8MAU8_TALSN	No hit	0	0	1	No hit	0	0	0
AS_DN87880_c0_g1	KFX46742 cds supercontig:ASM75011v1:scf017:77467:78650:-1 gene:GQ26_0170300 gene_biotype:protein_coding transcript_biotype:protein_coding description:40S ribosomal protein S10-B	0	95.0617	0	0	2.09255	Ascomycota	Winged helix-turn-helix transcription repressor DNA-binding	UniRef90_B8MAN1 40S ribosomal protein S10b n=8 Tax=Eurotiomycetes TaxID=147545 RepID=B8MAN1_TALSN	No hit	0	0	1	No hit	0	0	0
AS_DN24376_c0_g1	EED23486 cds supercontig:JCVI-TSTA1-3.0:scf_1105507295523:2655501:2656834:-1 gene:TSTA_069070 gene_biotype:protein_coding transcript_biotype:protein_coding description:phosphatidylserine decarboxylase, putative	1e-105	82.4201	0	0	2.09033	Ascomycota	Phosphatidylserine decarboxylase proenzyme	UniRef90_A0A2H3I084 Phosphatidylserine decarboxylase-related n=1 Tax=Penicillium occitanis TaxID=290292 RepID=A0A2H3I084_9EURO	No hit	0	0	1	No hit	0	0	0
AS_DN78659_c0_g1	KFX42569 cds supercontig:ASM75011v1:scf043:155463:158003:-1 gene:GQ26_0430550 gene_biotype:protein_coding transcript_biotype:protein_coding description:hypothetical protein	2e-134	87.4074	0	0	2.08928	Ascomycota	NA	UniRef90_A0A093UXY3 Uncharacterized protein n=1 Tax=Talaromyces marneffei PM1 TaxID=1077442 RepID=A0A093UXY3_TALMA	No hit	0	0	1	No hit	0	0	0
AS_DN89027_c0_g1	EEA24235 cds supercontig:JCVI-PMFA1-2.0:scf_1105668340960:1577490:1581674:1 gene:PMAA_082410 gene_biotype:protein_coding transcript_biotype:protein_coding description:ubiquitin hydrolase,putative	2e-132	91.3043	0.0485667	0	2.08873	Ascomycota	NA	UniRef90_B8MDG4 Ubiquitin C-terminal hydrolase (HAUSP), putative n=2 Tax=Talaromyces TaxID=5094 RepID=B8MDG4_TALSN	No hit	0.0420145	0	0.999117	No hit	0	0	0
AS_DN86910_c0_g1	KFX49280 cds supercontig:ASM75011v1:scf010:749879:753867:1 gene:GQ26_0102650 gene_biotype:protein_coding transcript_biotype:protein_coding description:Ribose-phosphate pyrophosphokinase 5	5e-129	90.3134	0	0	2.08433	Ascomycota	Putative Ribose-phosphate pyrophosphokinase	UniRef90_B8M6L6 Ribose-phosphate pyrophosphokinase n=3 Tax=Eurotiales TaxID=5042 RepID=B8M6L6_TALSN	No hit	0	0	1	No hit	0	0	0
AS_DN119010_c0_g1	CRG92704 cds supercontig:PIS:WF-38-12_scaffold00014:373903:376046:1 gene:PISL3812_09770 gene_biotype:protein_coding transcript_biotype:protein_coding description:Glycosyltransferase-like protein LARGE2	0	84.3669	0	0	2.08287	Ascomycota	NA	UniRef90_A0A2H3HYJ9 Uncharacterized protein n=1 Tax=Penicillium occitanis TaxID=290292 RepID=A0A2H3HYJ9_9EURO	No hit	0	0	1	No hit	0	0	0
AS_DN123881_c0_g1	KFX50099 cds supercontig:ASM75011v1:scf008:687793:689519:1 gene:GQ26_0082590 gene_biotype:protein_coding transcript_biotype:protein_coding description:putative mitochondrial chaperone BCS1-B	2e-93	84.8214	0	0	2.0803	Ascomycota	NA	UniRef90_B6QVH9 Mitochondrial chaperone bcs1, putative n=3 Tax=Eurotiales TaxID=5042 RepID=B6QVH9_TALMQ	No hit	0	0	1	No hit	0	0	0
AS_DN62947_c0_g1	EEA21673 cds supercontig:JCVI-PMFA1-2.0:scf_1105668340984:1247507:1250489:1 gene:PMAA_054700 gene_biotype:protein_coding transcript_biotype:protein_coding description:polyadenylate-binding protein	2e-157	95.4023	0	0	2.07596	Ascomycota	NA	UniRef90_A0A093V0W2 Polyadenylate-binding protein, cytoplasmic and nuclear n=1 Tax=Talaromyces marneffei PM1 TaxID=1077442 RepID=A0A093V0W2_TALMA	No hit	0	0	1	No hit	0	0	0
AS_DN68476_c0_g1	KFX53528 cds supercontig:ASM75011v1:scf001:884787:885972:-1 gene:GQ26_0013070 gene_biotype:protein_coding transcript_biotype:protein_coding description:Peroxiredoxin DOT5	1e-110	88.8889	0	0	2.07206	Ascomycota	Alkyl hydroperoxide reductase/ thiol specific antioxidant/ Mal allergen (Fragment)	UniRef90_A0A2H3I3A7 Alkyl hydroperoxide reductase subunit C/ Thiol specific antioxidant n=1 Tax=Penicillium occitanis TaxID=290292 RepID=A0A2H3I3A7_9EURO	No hit	0	0	1	No hit	0	0	0
AS_DN114449_c0_g1	KFX47663 cds supercontig:ASM75011v1:scf014:241426:243324:-1 gene:GQ26_0140890 gene_biotype:protein_coding transcript_biotype:protein_coding description:Ammonium transporter 1	0	92.4471	0	0	2.07185	Ascomycota	Ammonium transporter	UniRef90_B8LVM2 Ammonium transporter n=2 Tax=Talaromyces TaxID=5094 RepID=B8LVM2_TALSN	No hit	0	0	1	No hit	SP(Sec/SPI)	gnl|TC-DB|Q8NKD5|1.A.11.3.3 Ammonium transporter - Hebeloma cylindrosporum.	80.6647
AS_DN67122_c0_g1	EEA27082 cds supercontig:JCVI-PMFA1-2.0:scf_1105668340764:1216212:1217540:-1 gene:PMAA_019810 gene_biotype:protein_coding transcript_biotype:protein_coding description:stomatin family protein	0	88.8889	0	0	2.06451	Ascomycota	NA	UniRef90_B8M6M4 Stomatin family protein n=4 Tax=Eurotiales TaxID=5042 RepID=B8M6M4_TALSN	No hit	0	0	1	No hit	0	0	0
AS_DN60499_c0_g1	KFX50352 cds supercontig:ASM75011v1:scf007:278717:281443:-1 gene:GQ26_0070990 gene_biotype:protein_coding transcript_biotype:protein_coding description:Malate synthase, glyoxysomal	4e-83	72.3647	0	0	2.06165	Ascomycota	Malate synthase	UniRef90_A0A0D2ASZ4 Malate synthase n=1 Tax=Verruconis gallopava TaxID=253628 RepID=A0A0D2ASZ4_9PEZI	No hit	0	0	1	No hit	0	0	0
AS_DN33030_c0_g1	KFX50771 cds supercontig:ASM75011v1:scf006:220751:222112:1 gene:GQ26_0060790 gene_biotype:protein_coding transcript_biotype:protein_coding description:60S ribosomal protein L16	0	97.1098	0	0	2.06142	Ascomycota	Serine palmitoyltransferase 2	UniRef90_A0A0H1BK56 60S ribosomal protein L16 n=7 Tax=Ajellomycetaceae TaxID=299071 RepID=A0A0H1BK56_9EURO	No hit	0	0	1	No hit	0	0	0
AS_DN92366_c0_g1	KFX46194 cds supercontig:ASM75011v1:scf020:416122:416818:1 gene:GQ26_0201480 gene_biotype:protein_coding transcript_biotype:protein_coding description:hypothetical protein	4e-105	84.3137	0	0	2.06006	Ascomycota	NA	UniRef90_A0A2H3IDG2 Uncharacterized protein n=1 Tax=Penicillium occitanis TaxID=290292 RepID=A0A2H3IDG2_9EURO	No hit	0	0	1	No hit	0	0	0
AS_DN88270_c0_g1	KFX45355 cds supercontig:ASM75011v1:scf023:37348:38573:1 gene:GQ26_0230180 gene_biotype:protein_coding transcript_biotype:protein_coding description:Cofilin	0	95.6522	0	0	2.05845	Ascomycota	Actin depolymerizing factor	UniRef90_B8MJY8 Cofilin n=4 Tax=Eurotiales TaxID=5042 RepID=B8MJY8_TALSN	No hit	0	0	1	No hit	0	0	0
AS_DN17735_c0_g1	CRG83890 cds supercontig:PIS:WF-38-12_scaffold00001:3984781:3986294:-1 gene:PISL3812_01246 gene_biotype:protein_coding transcript_biotype:protein_coding description:ATP citrate (pro-S)-lyase	2e-63	76.4706	0	0	2.05191	Ascomycota	ATP citrate (Pro-S)-lyase	UniRef90_R1GH23 Putative atp citrate lyase subunit putatibe protein n=4 Tax=Botryosphaeriaceae TaxID=45131 RepID=R1GH23_BOTPV	No hit	0	0	1	No hit	0	0	0
AS_DN134213_c0_g1	KFX49013 cds supercontig:ASM75011v1:scf010:170888:172741:-1 gene:GQ26_0100620 gene_biotype:protein_coding transcript_biotype:protein_coding description:ATP synthase subunit d, mitochondrial	5e-124	85.0794	0	0	2.04694	Ascomycota	NA	UniRef90_A0A0F4YEU0 Uncharacterized protein n=1 Tax=Rasamsonia emersonii CBS 393.64 TaxID=1408163 RepID=A0A0F4YEU0_TALEM	No hit	0	0	1	No hit	0	0	0
AS_DN17878_c0_g1	KFX50037 cds supercontig:ASM75011v1:scf008:578095:580200:1 gene:GQ26_0082160 gene_biotype:protein_coding transcript_biotype:protein_coding description:putative eukaryotic translation initiation factor 2 subunit beta	0	94.9708	0	0	2.04608	Ascomycota	Eukaryotic translation initiation factor 2 subunit beta	UniRef90_B8MTB5 Translational initiation factor 2 beta n=8 Tax=Eurotiales TaxID=5042 RepID=B8MTB5_TALSN	No hit	0	0	1	No hit	0	0	0
AS_DN120365_c0_g1	KFX48395 cds supercontig:ASM75011v1:scf012:323396:325432:-1 gene:GQ26_0121130 gene_biotype:protein_coding transcript_biotype:protein_coding description:Methylmalonate-semialdehyde dehydrogenase[acylating], mitochondrial	0	91.3043	0	0	2.04139	Ascomycota	Malonate-semialdehyde dehydrogenase (Acetylating)/methylmalonate-semialdehyde dehydrogenase	UniRef90_B8LXM3 Methylmalonate-semialdehyde dehydrogenase, putative n=5 Tax=Eurotiales TaxID=5042 RepID=B8LXM3_TALSN	No hit	0	0	1	No hit	0	0	0
AS_DN16256_c0_g1	CRG87101 cds supercontig:PIS:WF-38-12_scaffold00003:1438037:1441939:-1 gene:PISL3812_04116 gene_biotype:protein_coding transcript_biotype:protein_coding description:60S ribosomal protein L2	9e-129	80.0948	0.0155749	0	2.033	Ascomycota	Ribosomal protein L2, C-terminal	UniRef90_R7YWD1 60S ribosomal protein L2 n=1 Tax=Coniosporium apollinis (strain CBS 100218) TaxID=1168221 RepID=R7YWD1_CONA1	No hit	0.0139276	0	0.999903	No hit	0	0	0
AS_DN93420_c0_g1	KFX53253 cds supercontig:ASM75011v1:scf001:317594:323065:-1 gene:GQ26_0011100 gene_biotype:protein_coding transcript_biotype:protein_coding description:BTB/POZ domain-containing protein 1	2e-93	81.0734	0	0	2.02337	Ascomycota	NA	UniRef90_A0A2H3IX20 BTB/POZ n=1 Tax=Penicillium occitanis TaxID=290292 RepID=A0A2H3IX20_9EURO	No hit	0	0	1	No hit	0	0	0
AS_DN14755_c0_g1	KFX46808 cds supercontig:ASM75011v1:scf017:241289:243932:-1 gene:GQ26_0170840 gene_biotype:protein_coding transcript_biotype:protein_coding description:ATP-dependent RNA helicase sub2	3e-167	87.5283	0	0	2.01603	Ascomycota	NA	UniRef90_A0A2H3I403 Uncharacterized protein n=1 Tax=Penicillium occitanis TaxID=290292 RepID=A0A2H3I403_9EURO	No hit	0	0	1	No hit	0	gnl|TC-DB|Q07478|3.A.22.1.1 ATP-dependent RNA helicase SUB2 OS=Saccharomyces cerevisiae (strain ATCC 204508 / S288c) GN=SUB2 PE=1 SV=1	85.7143
AS_DN111349_c0_g1	KFX48492 cds supercontig:ASM75011v1:scf012:550659:554984:1 gene:GQ26_0122010 gene_biotype:protein_coding transcript_biotype:protein_coding description:Xanthine dehydrogenase	2e-138	87.1795	0	0	2.01474	Ascomycota	NA	UniRef90_B8LWN3 Xanthine dehydrogenase HxA, putative n=5 Tax=Eurotiales TaxID=5042 RepID=B8LWN3_TALSN	No hit	0	0	1	No hit	0	0	0
AS_DN22637_c0_g1	KFX52187 cds supercontig:ASM75011v1:scf003:347099:348841:1 gene:GQ26_0031250 gene_biotype:protein_coding transcript_biotype:protein_coding description:D-arabinitol 2-dehydrogenase [ribulose-forming]	1e-109	87.4214	0	0	2.01199	Ascomycota	NA	UniRef90_B8MHX1 Short chain dehydrogenase, putative n=3 Tax=Talaromyces TaxID=5094 RepID=B8MHX1_TALSN	No hit	0	0	1	No hit	0	0	0
AS_DN100935_c0_g1	KFX46660 cds supercontig:ASM75011v1:scf018:416090:419086:-1 gene:GQ26_0181490 gene_biotype:protein_coding transcript_biotype:protein_coding description:putative MscS family protein	0	88.6261	0	0	2.00783	Ascomycota	NA	UniRef90_A0A093V394 Mechanosensitive ion channel protein n=2 Tax=Talaromyces marneffei TaxID=37727 RepID=A0A093V394_TALMA	No hit	0	0	1	No hit	0	0	0
AS_DN102863_c0_g1	GAM43445 cds supercontig:TcelY94_1.0:DF933846.1:209623:210985:-1 gene:TCE0_050r18269 gene_biotype:protein_coding transcript_biotype:protein_coding description:hypothetical protein	5e-174	95.0904	0	0	2.00469	Ascomycota	Putative plasma membrane snare protein	UniRef90_B8MQP7 Plasma membrane SNARE protein (Sec9), putative n=5 Tax=Eurotiales TaxID=5042 RepID=B8MQP7_TALSN	No hit	0	0	1	No hit	0	0	0
AS_DN69850_c0_g1	EEA27939 cds supercontig:JCVI-PMFA1-2.0:scf_1105668340764:3347947:3349528:1 gene:PMAA_027760 gene_biotype:protein_coding transcript_biotype:protein_coding description:bZIP transcription factor (MetR), putative	3e-142	88.1579	0	0	2.00144	Ascomycota	Regulatory protein cys-3	UniRef90_A0A2H3I7P2 Uncharacterized protein n=1 Tax=Penicillium occitanis TaxID=290292 RepID=A0A2H3I7P2_9EURO	No hit	0	0	1	No hit	0	0	0
AS_DN36595_c0_g1	KFX50737 cds supercontig:ASM75011v1:scf006:125529:129119:-1 gene:GQ26_0060470 gene_biotype:protein_coding transcript_biotype:protein_coding description:Beta-TrCP	0	90.3704	0	0	1.99933	Ascomycota	F-box/WD repeat-containing protein 11	UniRef90_B6Q619 F-box and WD40 domain protein, putative n=3 Tax=Eurotiales TaxID=5042 RepID=B6Q619_TALMQ	No hit	0	0	1	No hit	0	0	0
AS_DN61024_c0_g1	CRG87732 cds supercontig:PIS:WF-38-12_scaffold00003:3392654:3395407:1 gene:PISL3812_04752 gene_biotype:protein_coding transcript_biotype:protein_coding description:aconitate hydratase 1	2e-42	78.1931	0	0	1.99556	Ascomycota	NA	UniRef90_G2R6S2 Aconitate hydratase, mitochondrial n=1 Tax=Thielavia terrestris (strain ATCC 38088 / NRRL 8126) TaxID=578455 RepID=G2R6S2_THITE	No hit	0	0	1	No hit	0	0	0
AS_DN70595_c0_g1	KFX47839 cds supercontig:ASM75011v1:scf014:618247:620295:-1 gene:GQ26_0142240 gene_biotype:protein_coding transcript_biotype:protein_coding description:Phosphoglycerate kinase	1e-125	91.6667	0	0	1.99354	Ascomycota	Phosphoglycerate kinase	UniRef90_A0A0U1LPC9 Phosphoglycerate kinase n=2 Tax=Talaromyces TaxID=5094 RepID=A0A0U1LPC9_TALIS	No hit	0	0	1	No hit	0	0	0
AS_DN129403_c0_g1	KFX48392 cds supercontig:ASM75011v1:scf012:317377:319276:1 gene:GQ26_0121100 gene_biotype:protein_coding transcript_biotype:protein_coding description:Thioredoxin reductase	0	89.1775	0	0	1.99041	Ascomycota	Thioredoxin reductase	UniRef90_B8LXM6 Thioredoxin reductase n=5 Tax=Eurotiales TaxID=5042 RepID=B8LXM6_TALSN	No hit	0	0	1	No hit	0	0	0
AS_DN31852_c0_g1	EED20478 cds supercontig:JCVI-TSTA1-3.0:scf_1105507295541:3655386:3658097:1 gene:TSTA_036990 gene_biotype:protein_coding transcript_biotype:protein_coding description:conserved hypothetical protein	0	95.8333	0	0	1.98881	Ascomycota	NA	UniRef90_A0A093UXX6 Uncharacterized protein n=1 Tax=Talaromyces marneffei PM1 TaxID=1077442 RepID=A0A093UXX6_TALMA	No hit	0	0	1	No hit	0	0	0
AS_DN74252_c0_g1	KFX46041 cds supercontig:ASM75011v1:scf020:106453:107670:1 gene:GQ26_0200400 gene_biotype:protein_coding transcript_biotype:protein_coding description:GTP-binding protein ypt5	5e-149	91.7989	0	0	1.98706	Ascomycota	GTP-binding protein ypt5	UniRef90_A0A093VH74 GTP-binding protein ypt5 n=1 Tax=Talaromyces marneffei PM1 TaxID=1077442 RepID=A0A093VH74_TALMA	No hit	0	0	1	No hit	0	0	0
AS_DN94091_c0_g1	KFX48014 cds supercontig:ASM75011v1:scf013:228646:232580:1 gene:GQ26_0130880 gene_biotype:protein_coding transcript_biotype:protein_coding description:Alcohol dehydrogenase 2	7e-118	87.1585	0	0	1.98326	Ascomycota	NA	UniRef90_A0A2H3I784 BAR domain-containing family n=1 Tax=Penicillium occitanis TaxID=290292 RepID=A0A2H3I784_9EURO	No hit	0	0	1	No hit	0	0	0
AS_DN72983_c0_g1	EEA19635 cds supercontig:JCVI-PMFA1-2.0:scf_1105668340970:984666:987464:-1 gene:PMAA_004190 gene_biotype:protein_coding transcript_biotype:protein_coding description:sister chromatid cohesion acetyltransferase Eco1, putative	0	87.7434	0	0	1.9832	Ascomycota	N-acetyltransferase	UniRef90_A0A093VB83 N-acetyltransferase eso1 n=1 Tax=Talaromyces marneffei PM1 TaxID=1077442 RepID=A0A093VB83_TALMA	No hit	0	0	1	No hit	0	0	0
AS_DN1170_c0_g1	KFX41302 cds supercontig:ASM75011v1:scf064:65653:69456:-1 gene:GQ26_0640250 gene_biotype:protein_coding transcript_biotype:protein_coding description:Cullin-1	0	89.4737	0	0	1.9812	Ascomycota	Cullin	UniRef90_A0A093ULY8 Cullin-1 (Fragment) n=1 Tax=Talaromyces marneffei PM1 TaxID=1077442 RepID=A0A093ULY8_TALMA	No hit	0	0	1	No hit	0	0	0
AS_DN103997_c0_g1	KFX47730 cds supercontig:ASM75011v1:scf014:380265:381578:1 gene:GQ26_0141340 gene_biotype:protein_coding transcript_biotype:protein_coding description:60S ribosomal protein L10a	2e-148	80.4071	0	0	1.98106	Ascomycota	60S ribosomal protein L1	UniRef90_B8LVW7 Ribosomal protein n=6 Tax=Eurotiales TaxID=5042 RepID=B8LVW7_TALSN	No hit	0	0	1	No hit	0	0	0
AS_DN73783_c0_g1	KFX50613 cds supercontig:ASM75011v1:scf007:775798:779964:1 gene:GQ26_0072810 gene_biotype:protein_coding transcript_biotype:protein_coding description:putative copper-transporting ATPase HMA5	0	83.522	0	0	1.98066	Ascomycota	Putative copper-importing P-type ATPase A	UniRef90_B6Q5D8 Copper-transporting ATPase, putative n=3 Tax=Eurotiales TaxID=5042 RepID=B6Q5D8_TALMQ	No hit	0	0	1	No hit	0	0	0
AS_DN23361_c0_g1	EEA20603 cds supercontig:JCVI-PMFA1-2.0:scf_1105668340738:1505051:1506588:1 gene:PMAA_044360 gene_biotype:protein_coding transcript_biotype:protein_coding description:eukaryotic translation initiation factor 3 subunit EifCh, putative	0	92.8655	0	0	1.97358	Ascomycota	Eukaryotic translation initiation factor 3 subunit H	UniRef90_B8LUV3 Eukaryotic translation initiation factor 3 subunit H n=5 Tax=Eurotiales TaxID=5042 RepID=B8LUV3_TALSN	No hit	0	0	1	No hit	0	0	0
AS_DN88423_c0_g1	KFX42969 cds supercontig:ASM75011v1:scf039:131889:136222:1 gene:GQ26_0390410 gene_biotype:protein_coding transcript_biotype:protein_coding description:Malate dehydrogenase, mitochondrial	2e-52	79.0476	0	0	1.96915	Ascomycota	NA	UniRef90_M2S520 Malate dehydrogenase n=4 Tax=Pleosporales TaxID=92860 RepID=M2S520_COCSN	No hit	0	0	1	No hit	0	0	0
AS_DN106821_c0_g1	KFX42156 cds supercontig:ASM75011v1:scf048:77558:80452:-1 gene:GQ26_0480300 gene_biotype:protein_coding transcript_biotype:protein_coding description:putative transcriptional regulatory protein	5e-61	70.2306	0	0	1.96562	Ascomycota	NA	UniRef90_A0A2H3IQV7 Transcription factor n=1 Tax=Penicillium occitanis TaxID=290292 RepID=A0A2H3IQV7_9EURO	No hit	0	0	1	No hit	0	0	0
AS_DN107065_c0_g1	CRG91429 cds supercontig:PIS:WF-38-12_scaffold00009:1510225:1512496:-1 gene:PISL3812_08477 gene_biotype:protein_coding transcript_biotype:protein_coding description:Heat shock 70 kDa protein	4e-75	81.9572	0	0	1.95553	Ascomycota	NA	UniRef90_Q2H0U1 Uncharacterized protein n=10 Tax=Sordariomycetes TaxID=147550 RepID=Q2H0U1_CHAGB	Hsp70	0	0	1	No hit	0	0	0
AS_DN70224_c0_g1	GAM40167 cds supercontig:TcelY94_1.0:DF933834.1:75156:76856:-1 gene:TCE0_038r12301 gene_biotype:protein_coding transcript_biotype:protein_coding description:hypothetical protein	0	97.5104	0	0	1.95477	Ascomycota	Glucan synthesis regulatory protein	UniRef90_A0A225B686 Uncharacterized protein n=1 Tax=Talaromyces atroroseus TaxID=1441469 RepID=A0A225B686_9EURO	No hit	0	0	1	No hit	0	0	0
AS_DN1794_c0_g1	CRG87256 cds supercontig:PIS:WF-38-12_scaffold00003:1933572:1936346:-1 gene:PISL3812_04273 gene_biotype:protein_coding transcript_biotype:protein_coding description:5-methyltetrahydropteroyltriglutamate--homocysteine methyltransferase	6e-157	77.8973	0	0	1.95286	Ascomycota	Cobalamin-independent methionine synthase MetH/D	UniRef90_A0A0D1XQZ3 5-methyltetrahydropteroyltriglutamate-homocysteine S-methyltransferase n=1 Tax=Verruconis gallopava TaxID=253628 RepID=A0A0D1XQZ3_9PEZI	No hit	0	0	1	No hit	0	0	0
AS_DN140119_c0_g1	EEA27350 cds supercontig:JCVI-PMFA1-2.0:scf_1105668340764:1884180:1886544:1 gene:PMAA_022330 gene_biotype:protein_coding transcript_biotype:protein_coding description:autophagy protein Atg20, putative	1e-130	92.6984	0.0483423	0	1.95015	Ascomycota	NA	UniRef90_B8M7S4 Autophagy protein Atg20, putative n=2 Tax=Talaromyces TaxID=5094 RepID=B8M7S4_TALSN	No hit	0.0435967	0	0.999049	No hit	0	0	0
AS_DN68058_c0_g1	KFX48675 cds supercontig:ASM75011v1:scf011:224843:225946:-1 gene:GQ26_0110710 gene_biotype:protein_coding transcript_biotype:protein_coding description:Coiled-coil domain-containing protein	0	82.5789	0	0.0185293	1.94188	Ascomycota	HMG-box variant	UniRef90_A0A2H3IVJ4 Uncharacterized protein n=1 Tax=Penicillium occitanis TaxID=290292 RepID=A0A2H3IVJ4_9EURO	No hit	0	0.0170122	0.999855	No hit	0	0	0
AS_DN78871_c0_g1	EEA20182 cds supercontig:JCVI-PMFA1-2.0:scf_1105668340738:430418:432601:-1 gene:PMAA_040390 gene_biotype:protein_coding transcript_biotype:protein_coding description:DNA binding protein SART-1, putative	0	93.2018	0	0	1.94124	Ascomycota	NA	UniRef90_B6QPX6 DNA binding protein SART-1, putative n=2 Tax=Eurotiales TaxID=5042 RepID=B6QPX6_TALMQ	No hit	0	0	1	No hit	0	0	0
AS_DN21447_c0_g1	KFX45025 cds supercontig:ASM75011v1:scf025:292704:295010:-1 gene:GQ26_0251150 gene_biotype:protein_coding transcript_biotype:protein_coding description:Peroxisomal membrane protein PAS20	0	82.9787	0	0	1.93849	Ascomycota	Peroxisomal membrane protein PAS20	UniRef90_B8MFA5 Peroxisomal membrane protein (Pex13), putative n=3 Tax=Eurotiales TaxID=5042 RepID=B8MFA5_TALSN	No hit	0	0	1	No hit	0	0	0
AS_DN73293_c0_g1	KFX41693 cds supercontig:ASM75011v1:scf055:32963:34370:-1 gene:GQ26_0550130 gene_biotype:protein_coding transcript_biotype:protein_coding description:Cytosolic Fe-S cluster assembly factor nbp35	0	88.8021	0	0	1.93305	Ascomycota	Cytosolic Fe-S cluster assembly factor	UniRef90_B8MBN4 Cytosolic Fe-S cluster assembly factor NBP35 n=5 Tax=Eurotiales TaxID=5042 RepID=B8MBN4_TALSN	No hit	0	0	1	No hit	0	0	0
AS_DN34821_c0_g1	OKL63540 cds supercontig:ASM190759v1:scaffold_1:372449:374127:1 gene:UA08_01209 gene_biotype:protein_coding transcript_biotype:protein_coding description:putative UTP--glucose-1-phosphate uridylyltransferase	4e-170	92.3261	0	0	1.93188	Ascomycota	NA	UniRef90_A0A0E9NK66 Uncharacterized protein n=1 Tax=Saitoella complicata NRRL Y-17804 TaxID=698492 RepID=A0A0E9NK66_9Ascomycota	No hit	0	0	1	No hit	0	0	0
AS_DN131706_c0_g1	GAM33404 cds supercontig:TcelY94_1.0:DF933800.1:274996:277775:-1 gene:TCE0_004r00274 gene_biotype:protein_coding transcript_biotype:protein_coding description:membrane organization and biogenesis-related protein	0	98.3471	0	0	1.9291	Ascomycota	NA	UniRef90_B6QIM3 Protein sey1 n=3 Tax=Talaromyces marneffei TaxID=37727 RepID=SEY1_TALMQ	No hit	0	0	1	No hit	0	0	0
AS_DN88866_c0_g1	GAM43216 cds supercontig:TcelY94_1.0:DF933843.1:333381:334763:-1 gene:TCE0_047r17841 gene_biotype:protein_coding transcript_biotype:protein_coding description:hypothetical protein	0	95.9524	0	0	1.927	Ascomycota	Peptidyl-prolyl cis-trans isomerase	UniRef90_A0A093VHG7 Peptidyl-prolyl cis-trans isomerase D n=4 Tax=Eurotiales TaxID=5042 RepID=A0A093VHG7_TALMA	No hit	0	0	1	No hit	0	0	0
AS_DN101236_c0_g1	EED16576 cds supercontig:JCVI-TSTA1-3.0:scf_1105507295549:2157913:2160006:1 gene:TSTA_016530 gene_biotype:protein_coding transcript_biotype:protein_coding description:cell wall glucanase(Utr2), putative	0	81.0651	0	0	1.91766	Ascomycota	Murein transglycosylase	UniRef90_A0A2H3J870 Concanavalin A-like lectin/glucanase, subgroup n=1 Tax=Penicillium occitanis TaxID=290292 RepID=A0A2H3J870_9EURO	No hit	0	0	1	GH16(8-174)	0	0	0
AS_DN132865_c0_g1	KFX44214 cds supercontig:ASM75011v1:scf030:289033:290456:1 gene:GQ26_0301150 gene_biotype:protein_coding transcript_biotype:protein_coding description:Disulfide-bond oxidoreductase YfcG	2e-84	73.8806	0.0293726	0	1.9175	Ascomycota	NA	UniRef90_A0A2H3IUR4 Uncharacterized protein n=1 Tax=Penicillium occitanis TaxID=290292 RepID=A0A2H3IUR4_9EURO	No hit	0.0270274	0	0.999635	No hit	0	0	0
AS_DN77479_c0_g1	KFX50006 cds supercontig:ASM75011v1:scf008:519286:520038:-1 gene:GQ26_0081950 gene_biotype:protein_coding transcript_biotype:protein_coding description:Cystathionine beta-synthase	0	90.9761	0	0	1.91156	Ascomycota	Cystathionine beta-synthase	UniRef90_B8MSK8 Cystathionine beta-synthase (Beta-thionase), putative n=4 Tax=Eurotiales TaxID=5042 RepID=B8MSK8_TALSN	No hit	0	0	1	No hit	0	0	0
AS_DN128065_c0_g1	KFX48988 cds supercontig:ASM75011v1:scf010:117135:125135:-1 gene:GQ26_0100410 gene_biotype:protein_coding transcript_biotype:protein_coding description:Two-component system protein B	1e-105	85.5191	0	0	1.91032	Ascomycota	NA	UniRef90_A0A2H3IKB9 CheY-like superfamily n=1 Tax=Penicillium occitanis TaxID=290292 RepID=A0A2H3IKB9_9EURO	No hit	0	0	1	No hit	0	0	0
AS_DN63652_c0_g1	GAM33388 cds supercontig:TcelY94_1.0:DF933800.1:228980:230712:1 gene:TCE0_004f00248 gene_biotype:protein_coding transcript_biotype:protein_coding description:nonsense-mediated-related protein	1e-66	73.7443	0	0	1.90756	Ascomycota	NA	UniRef90_A0A177CNQ4 Uncharacterized protein n=1 Tax=Paraphaeosphaeria sporulosa TaxID=1460663 RepID=A0A177CNQ4_9PLEO	No hit	0	0	1	No hit	0	0	0
AS_DN82101_c0_g1	KFX48655 cds supercontig:ASM75011v1:scf011:178820:181499:1 gene:GQ26_0110540 gene_biotype:protein_coding transcript_biotype:protein_coding description:Nuclear elongation and deformation protein 1	6e-154	89.8345	0	0	1.90632	Ascomycota	NA	UniRef90_B8M2Z1 Lipin Smp2, putative n=4 Tax=Eurotiales TaxID=5042 RepID=B8M2Z1_TALSN	No hit	0	0	1	No hit	0	0	0
AS_DN20696_c0_g1	KFX51245 cds supercontig:ASM75011v1:scf005:262026:264377:-1 gene:GQ26_0050890 gene_biotype:protein_coding transcript_biotype:protein_coding description:Transcription factor atf21	3e-142	88.806	0	0	1.90518	Ascomycota	NA	UniRef90_A0A093VGD2 Transcription factor atf21 n=4 Tax=Eurotiales TaxID=5042 RepID=A0A093VGD2_TALMA	No hit	0	0	1	No hit	0	0	0
AS_DN101040_c0_g1	KFX50798 cds supercontig:ASM75011v1:scf006:287999:289548:-1 gene:GQ26_0061030 gene_biotype:protein_coding transcript_biotype:protein_coding description:Uncharacterized protein	0	90.4948	0	0	1.90312	Ascomycota	Erythromycin esterase	UniRef90_B6Q6E5 Erythromycin esterase, putative n=3 Tax=Eurotiales TaxID=5042 RepID=B6Q6E5_TALMQ	No hit	0	0	1	No hit	0	0	0
AS_DN25721_c0_g1	KFX49015 cds supercontig:ASM75011v1:scf010:174704:175348:-1 gene:GQ26_0100640 gene_biotype:protein_coding transcript_biotype:protein_coding description:60S ribosomal protein L14-A	0	95.8333	0	0	1.90075	Ascomycota	Large subunit ribosomal protein L14e	UniRef90_A0A2H3IB88 Ribosomal protein L14 n=1 Tax=Penicillium occitanis TaxID=290292 RepID=A0A2H3IB88_9EURO	No hit	0	0	1	No hit	0	0	0
AS_DN59993_c0_g1	CRG87400 cds supercontig:PIS:WF-38-12_scaffold00003:2359440:2360365:1 gene:PISL3812_04417 gene_biotype:protein_coding transcript_biotype:protein_coding description:nucleoside-diphosphate kinase	1e-95	82.4	0	0	1.89836	Ascomycota	Nucleoside diphosphate kinase	UniRef90_R7YM22 Nucleoside diphosphate kinase n=1 Tax=Coniosporium apollinis (strain CBS 100218) TaxID=1168221 RepID=R7YM22_CONA1	No hit	0	0	1	No hit	0	0	0
AS_DN100579_c0_g1	KFX48196 cds supercontig:ASM75011v1:scf013:659987:662277:1 gene:GQ26_0132440 gene_biotype:protein_coding transcript_biotype:protein_coding description:Inosine-5'-monophosphate dehydrogenase	0	93.2712	0	0.0134375	1.89543	Ascomycota	Inosine-5'-monophosphate dehydrogenase	UniRef90_A0A0F4YFL5 Inosine-5'-monophosphate dehydrogenase n=2 Tax=Eurotiales TaxID=5042 RepID=A0A0F4YFL5_TALEM	No hit	0	0.0125543	0.999921	No hit	0	0	0
AS_DN114159_c0_g1	KFX50786 cds supercontig:ASM75011v1:scf006:257318:259742:-1 gene:GQ26_0060930 gene_biotype:protein_coding transcript_biotype:protein_coding description:DnaJ like subfamily C member 7 like	6e-123	90.1449	0	0	1.88007	Ascomycota	NA	UniRef90_B6Q666 DnaJ and TPR domain protein n=4 Tax=Eurotiales TaxID=5042 RepID=B6Q666_TALMQ	DnaJ	0	0	1	No hit	0	0	0
AS_DN61451_c0_g1	EEA23932 cds supercontig:JCVI-PMFA1-2.0:scf_1105668340960:756525:758060:1 gene:PMAA_079550 gene_biotype:protein_coding transcript_biotype:protein_coding description:clock controled protein (Ccg-8), putative	3e-152	87.5527	0	0	1.86914	Ascomycota	Clock controled protein	UniRef90_B6QEC6 Clock controled protein (Ccg-8), putative n=3 Tax=Eurotiales TaxID=5042 RepID=B6QEC6_TALMQ	No hit	0	0	1	No hit	0	0	0
AS_DN106446_c0_g1	KFX42447 cds supercontig:ASM75011v1:scf044:47195:48897:1 gene:GQ26_0440220 gene_biotype:protein_coding transcript_biotype:protein_coding description:Annexin A7	0	84.9508	0	0	1.86825	Ascomycota	Annexin	UniRef90_A0A2H3IMM9 Annexin n=1 Tax=Penicillium occitanis TaxID=290292 RepID=A0A2H3IMM9_9EURO	No hit	0	0	1	No hit	0	0	0
AS_DN134217_c0_g1	KFX45193 cds supercontig:ASM75011v1:scf024:150779:152954:1 gene:GQ26_0240490 gene_biotype:protein_coding transcript_biotype:protein_coding description:Carbonic anhydrase	3e-91	81.5534	0	0	1.86823	Ascomycota	NA	UniRef90_B6QNG4 Carbonic anhydrase n=3 Tax=Eurotiales TaxID=5042 RepID=B6QNG4_TALMQ	No hit	0	0	1	No hit	0	0	0
AS_DN129566_c0_g1	KFX48171 cds supercontig:ASM75011v1:scf013:608284:609637:-1 gene:GQ26_0132240 gene_biotype:protein_coding transcript_biotype:protein_coding description:Allergen Asp f 4	0	85.3616	0	0	1.86786	Ascomycota	Allergen Asp f	UniRef90_A0A2H3IHW7 Uncharacterized protein n=1 Tax=Penicillium occitanis TaxID=290292 RepID=A0A2H3IHW7_9EURO	No hit	0	0	1	No hit	0	0	0
AS_DN88466_c0_g1	GAM33662 cds supercontig:TcelY94_1.0:DF933807.1:640726:644161:-1 gene:TCE0_011r00732 gene_biotype:protein_coding transcript_biotype:protein_coding description:hypothetical protein	0	97.9839	0	0	1.86602	Ascomycota	NA	UniRef90_A0A0B8MXL9 Uncharacterized protein n=1 Tax=Talaromyces cellulolyticus TaxID=1472165 RepID=A0A0B8MXL9_9EURO	No hit	0	0	1	No hit	0	0	0
AS_DN113744_c0_g1	KFX47873 cds supercontig:ASM75011v1:scf014:689492:693835:-1 gene:GQ26_0142500 gene_biotype:protein_coding transcript_biotype:protein_coding description:Pre-mRNA-processing ATP-dependent RNA helicase prp5	0	90.5526	0	0	1.86425	Ascomycota	NA	UniRef90_A0A093XRI7 Pre-mRNA-processing ATP-dependent RNA helicase prp5 n=1 Tax=Talaromyces marneffei PM1 TaxID=1077442 RepID=A0A093XRI7_TALMA	No hit	0	0	1	No hit	0	0	0
AS_DN137969_c0_g1	KFX43209 cds supercontig:ASM75011v1:scf037:151528:155005:1 gene:GQ26_0370570 gene_biotype:protein_coding transcript_biotype:protein_coding description:Ubiquitin-activating enzyme E1 1	0	91.9753	0	0	1.85616	Ascomycota	NA	UniRef90_B6Q8A4 Poly(A)+ RNA transport protein (UbaA), putative n=4 Tax=Eurotiales TaxID=5042 RepID=B6Q8A4_TALMQ	No hit	0	0	1	No hit	0	gnl|TC-DB|E7LWL7|3.A.16.1.2 Uba1p OS=Saccharomyces cerevisiae (strain VIN 13) GN=VIN13_2757 PE=3 SV=1	80.2469
AS_DN1219_c0_g1	EEA26142 cds supercontig:JCVI-PMFA1-2.0:scf_1105668340758:2900603:2902320:1 gene:PMAA_072240 gene_biotype:protein_coding transcript_biotype:protein_coding description:MYND domain protein(SamB), putative	3e-127	87.8571	0	0	1.85539	Ascomycota	Putative mynd domain containing protein	UniRef90_B6Q9Q8 MYND domain protein (SamB), putative n=1 Tax=Talaromyces marneffei (strain ATCC 18224 / CBS 334.59 / QM 7333)TaxID=441960 RepID=B6Q9Q8_TALMQ	No hit	0	0	1	No hit	0	0	0
AS_DN79426_c0_g1	KFX48527 cds supercontig:ASM75011v1:scf012:634852:636310:1 gene:GQ26_0122250 gene_biotype:protein_coding transcript_biotype:protein_coding description:3-ketoacyl-CoA thiolase, peroxisomal	0	87.4233	0	0	1.85193	Ascomycota	Acetyl-CoA C-acyltransferase	UniRef90_B8LW27 3-ketoacyl-coA thiolase peroxisomal A n=4 Tax=Eurotiales TaxID=5042 RepID=B8LW27_TALSN	No hit	0	0	1	No hit	0	0	0
AS_DN87402_c0_g1	EEA19198 cds supercontig:JCVI-PMFA1-2.0:scf_1105668340770:1644895:1646272:-1 gene:PMAA_014580 gene_biotype:protein_coding transcript_biotype:protein_coding description:enoyl-CoA hydratase/isomerase family protein	1e-120	86.7769	0	0	1.84912	Ascomycota	Enoyl-CoA hydratase/isomerase family protein	UniRef90_B6QVV1 Enoyl-CoA hydratase/isomerase family protein n=2 Tax=Talaromyces marneffei TaxID=37727 RepID=B6QVV1_TALMQ	No hit	0	0	1	No hit	0	0	0
AS_DN88028_c0_g1	KFX47525 cds supercontig:ASM75011v1:scf015:695593:698345:1 gene:GQ26_0152300 gene_biotype:protein_coding transcript_biotype:protein_coding description:Fimbrin	0	91.1828	0	0	1.84753	Ascomycota	NA	UniRef90_B8M0Y6 Actin-bundling protein Sac6, putative n=6 Tax=Eurotiales TaxID=5042 RepID=B8M0Y6_TALSN	No hit	0	0	1	No hit	0	0	0
AS_DN80024_c0_g1	KFX45551 cds supercontig:ASM75011v1:scf023:462222:463965:-1 gene:GQ26_0231650 gene_biotype:protein_coding transcript_biotype:protein_coding description:Zinc-binding alcohol dehydrogenase domain-containing protein cipB	0	89.2797	0	0	1.84726	Ascomycota	NA	UniRef90_B8LV35 Alcohol dehydrogenase, putative n=4 Tax=Eurotiales TaxID=5042 RepID=B8LV35_TALSN	No hit	0	0	1	No hit	0	0	0
AS_DN128354_c0_g1	CRG83502 cds supercontig:PIS:WF-38-12_scaffold00001:2762480:2764153:-1 gene:PISL3812_00853 gene_biotype:protein_coding transcript_biotype:protein_coding description:UTP--glucose-1-phosphate uridylyltransferase	2e-140	83.8095	0	0	1.8394	Ascomycota	NA	UniRef90_B8PS66 UTP--glucose-1-phosphate uridylyltransferase n=16 Tax=Pleosporales TaxID=92860 RepID=B8PS66_9PLEO	No hit	0	0	1	No hit	0	0	0
AS_DN127510_c0_g1	KFX51497 cds supercontig:ASM75011v1:scf005:803210:806417:-1 gene:GQ26_0052670 gene_biotype:protein_coding transcript_biotype:protein_coding description:ATP-citrate synthase subunit 1	8e-147	92.5287	0	0	1.8315	Ascomycota	NA	UniRef90_B8MQ83 ATP citrate lyase, subunit 1, putative n=5 Tax=Eurotiales TaxID=5042 RepID=B8MQ83_TALSN	No hit	0	0	1	No hit	0	0	0
AS_DN62997_c0_g1	OKL56678 cds supercontig:ASM190759v1:scaffold_13:601517:602692:1 gene:UA08_08250 gene_biotype:protein_coding transcript_biotype:protein_coding description:hypothetical protein	9e-128	77.2917	0	0	1.8306	Ascomycota	NA	UniRef90_A0A225AHW3 Uncharacterized protein n=2 Tax=Eurotiales TaxID=5042 RepID=A0A225AHW3_9EURO	No hit	0	0	1	No hit	0	0	0
AS_DN84363_c0_g1	OKL64653 cds supercontig:ASM190759v1:scaffold_0:2254842:2256075:1 gene:UA08_00796 gene_biotype:protein_coding transcript_biotype:protein_coding description:60S ribosomal protein L5	2e-68	80.791	0	0	1.82602	Ascomycota	NA	UniRef90_A0A177CT76 Translational machinery component n=1 Tax=Paraphaeosphaeria sporulosa TaxID=1460663 RepID=A0A177CT76_9PLEO	No hit	0	0	1	No hit	0	0	0
AS_DN114970_c0_g1	GAM43433 cds supercontig:TcelY94_1.0:DF933846.1:172937:173575:-1 gene:TCE0_050r18243 gene_biotype:protein_coding transcript_biotype:protein_coding description:hypothetical protein	0	97.7778	0	0	1.82507	Ascomycota	NA	UniRef90_A0A2H3IC74 Protein trafficking Pga2 n=2 Tax=Eurotiales TaxID=5042 RepID=A0A2H3IC74_9EURO	No hit	0	0	1	No hit	0	0	0
AS_DN113882_c0_g1	EEA26092 cds supercontig:JCVI-PMFA1-2.0:scf_1105668340758:2761468:2763971:1 gene:PMAA_071730 gene_biotype:protein_coding transcript_biotype:protein_coding description:conserved hypothetical protein	1e-150	87.9433	0	0	1.82444	Ascomycota	Calcium/proton exchanger	UniRef90_A0A2H3IWR3 Sodium/calcium exchanger membrane region n=1 Tax=Penicillium occitanis TaxID=290292 RepID=A0A2H3IWR3_9EURO	No hit	0	0	1	No hit	0	gnl|TC-DB|Q99385|2.A.19.2.2 CHROMOSOME IV READING FRAME ORF YDL128W - Saccharomyces cerevisiae (Baker's yeast).	77.305
AS_DN127998_c0_g1	KFX50592 cds supercontig:ASM75011v1:scf007:739319:741427:-1 gene:GQ26_0072680 gene_biotype:protein_coding transcript_biotype:protein_coding description:hypothetical protein	7e-139	86.2366	0	0	1.81557	Ascomycota	NA	UniRef90_B8M5H9 Uncharacterized protein n=4 Tax=Eurotiales TaxID=5042 RepID=B8M5H9_TALSN	No hit	0	0	1	No hit	0	0	0
AS_DN100465_c0_g1	KFX43782 cds supercontig:ASM75011v1:scf032:16741:18743:1 gene:GQ26_0320060 gene_biotype:protein_coding transcript_biotype:protein_coding description:Disintegrin and metalloproteinase domain-containing protein 29	2e-148	95.9502	0	0	1.81045	Ascomycota	NA	UniRef90_A0A093UU07 Disintegrin and metalloproteinase domain-containing protein 29 n=5 Tax=Eurotiales TaxID=5042 RepID=A0A093UU07_TALMA	No hit	0	0	1	No hit	0	0	0
AS_DN90696_c0_g1	KFX46746 cds supercontig:ASM75011v1:scf017:82799:85225:-1 gene:GQ26_0170330 gene_biotype:protein_coding transcript_biotype:protein_coding description:Epsin-1	0	87.7193	0	0	1.80911	Ascomycota	EH domain binding protein epsin 2	UniRef90_B6QDK8 EH domain binding protein epsin 2 n=2 Tax=Talaromyces marneffei TaxID=37727 RepID=B6QDK8_TALMQ	No hit	0	0	1	No hit	0	0	0
AS_DN82284_c0_g1	KFX42306 cds supercontig:ASM75011v1:scf046:86291:87805:1 gene:GQ26_0460380 gene_biotype:protein_coding transcript_biotype:protein_coding description:60S ribosomal protein L17	1e-155	87.7863	0	0	1.80842	Ascomycota	NA	No hits	No hit	0	0	1	No hit	0	0	0
AS_DN80975_c0_g1	KFX53237 cds supercontig:ASM75011v1:scf001:267933:270428:-1 gene:GQ26_0010960 gene_biotype:protein_coding transcript_biotype:protein_coding description:78 kDa glucose-regulated protein like	5e-139	94.1358	0	0	1.80544	Ascomycota	NA	UniRef90_A0A0J8QP36 Heat shock protein C n=1 Tax=Coccidioides immitis RMSCC 3703 TaxID=454286 RepID=A0A0J8QP36_COCIT	Hsp70	0	0	1	No hit	SP(Sec/SPI)	0	0
AS_DN26871_c0_g1	KFX52204 cds supercontig:ASM75011v1:scf003:377235:378299:-1 gene:GQ26_0031350 gene_biotype:protein_coding transcript_biotype:protein_coding description:Mitochondrial peroxiredoxin PRX1	3e-167	91.0959	0	0.0292599	1.79873	Ascomycota	Regulation of redox homeostasis	UniRef90_A0A093VQD3 Mitochondrial peroxiredoxin PRX1 n=4 Tax=Eurotiales TaxID=5042 RepID=A0A093VQD3_TALMA	No hit	0	0.0280117	0.999608	No hit	0	0	0
AS_DN60940_c0_g1	KFX49120 cds supercontig:ASM75011v1:scf010:418136:419053:1 gene:GQ26_0101510 gene_biotype:protein_coding transcript_biotype:protein_coding description:hypothetical protein	6e-169	87.7778	0	0	1.79253	Ascomycota	NA	UniRef90_B6Q2J3 Uncharacterized protein n=4 Tax=Eurotiales TaxID=5042 RepID=B6Q2J3_TALMQ	No hit	0	0	1	No hit	0	0	0
AS_DN114739_c0_g1	KFX42364 cds supercontig:ASM75011v1:scf045:57729:60066:1 gene:GQ26_0450180 gene_biotype:protein_coding transcript_biotype:protein_coding description:putative RNA-binding protein C25G10.01	1e-120	91.6667	0	0	1.79193	Ascomycota	NA	UniRef90_B8MFL2 Transformer-SR ribonucleoprotein, putative n=4 Tax=Eurotiales TaxID=5042 RepID=B8MFL2_TALSN	No hit	0	0	1	No hit	0	0	0
AS_DN36355_c0_g1	GAM40262 cds supercontig:TcelY94_1.0:DF933834.1:399034:403790:-1 gene:TCE0_038r12477 gene_biotype:protein_coding transcript_biotype:protein_coding description:translation initiation factor	0	96.9136	0	0	1.78754	Ascomycota	NA	UniRef90_A0A093VH62 Eukaryotic translation initiation factor 4 gamma n=6 Tax=Eurotiales TaxID=5042 RepID=A0A093VH62_TALMA	No hit	0	0	1	No hit	0	0	0
AS_DN127893_c0_g1	EEA25465 cds supercontig:JCVI-PMFA1-2.0:scf_1105668340758:1044438:1045528:1 gene:PMAA_065730 gene_biotype:protein_coding transcript_biotype:protein_coding description:succinate dehydrogenase subunit CybS, putative	0	90.6433	0	0	1.78497	Ascomycota	Succinate dehydrogenase [ubiquinone] cytochrome b small subunit	UniRef90_B8M1W8 Succinate dehydrogenase [ubiquinone] cytochrome b small subunit n=3 Tax=Eurotiales TaxID=5042 RepID=B8M1W8_TALSN	No hit	0	0	1	No hit	0	0	0
AS_DN106060_c0_g1	KFX48039 cds supercontig:ASM75011v1:scf013:292310:298343:1 gene:GQ26_0131120 gene_biotype:protein_coding transcript_biotype:protein_coding description:SET domain-containing protein 3	5e-104	85	0	0	1.78061	Ascomycota	NA	UniRef90_A0A2H3IML7 Zinc finger, FYVE/PHD-type n=1 Tax=Penicillium occitanis TaxID=290292 RepID=A0A2H3IML7_9EURO	No hit	0	0	1	No hit	0	0	0
AS_DN88808_c0_g1	GAM43354 cds supercontig:TcelY94_1.0:DF933843.1:759636:761153:1 gene:TCE0_047f18094 gene_biotype:protein_coding transcript_biotype:protein_coding description:hypothetical protein	2e-133	85.3211	0	0	1.77523	Ascomycota	NA	UniRef90_A0A2B7YZF0 60S ribosomal protein L7 n=1 Tax=Polytolypa hystricis UAMH7299 TaxID=1447883 RepID=A0A2B7YZF0_9EURO	No hit	0	0	1	No hit	0	0	0
AS_DN87858_c0_g1	KFX43568 cds supercontig:ASM75011v1:scf034:95592:96838:1 gene:GQ26_0340370 gene_biotype:protein_coding transcript_biotype:protein_coding description:High mobility group protein 1.2	3e-167	90.535	0	0	1.7737	Ascomycota	NA	UniRef90_A0A2H3IR26 High mobility group, superfamily n=1 Tax=Penicillium occitanis TaxID=290292 RepID=A0A2H3IR26_9EURO	No hit	0	0	1	No hit	0	0	0
AS_DN33253_c0_g1	OKL56541 cds supercontig:ASM190759v1:scaffold_13:702754:703959:1 gene:UA08_08281 gene_biotype:protein_coding transcript_biotype:protein_coding description:Cytochrome c peroxidase, mitochondrial	0	89.5455	0	0	1.77324	Ascomycota	Cytochrome c peroxidase, mitochondrial	UniRef90_A0A225A7C7 Peroxidase n=1 Tax=Talaromyces atroroseus TaxID=1441469 RepID=A0A225A7C7_9EURO	No hit	0	0	1	AA2(2-205)	0	0	0
AS_DN60970_c0_g1	EED17390 cds supercontig:JCVI-TSTA1-3.0:scf_1105507295555:314125:315621:1 gene:TSTA_112230 gene_biotype:protein_coding transcript_biotype:protein_coding description:hypothetical protein	3e-179	77.5735	0	0	1.76065	Ascomycota	NA	UniRef90_B6QDA1 Uncharacterized protein n=1 Tax=Talaromyces marneffei (strain ATCC 18224 / CBS 334.59 / QM 7333) TaxID=441960 RepID=B6QDA1_TALMQ	No hit	0	0	1	No hit	0	0	0
AS_DN76453_c0_g1	KFX44893 cds supercontig:ASM75011v1:scf025:34963:37709:-1 gene:GQ26_0250110 gene_biotype:protein_coding transcript_biotype:protein_coding description:Zinc finger protein rsv2	3e-162	91.9708	0	0	1.75487	Ascomycota	NA	UniRef90_B6QCA8 C2H2 transcription factor (Rpn4), putative n=3 Tax=Eurotiales TaxID=5042 RepID=B6QCA8_TALMQ	No hit	0	0	1	No hit	0	0	0
AS_DN101361_c0_g1	KFX49192 cds supercontig:ASM75011v1:scf010:585509:587808:1 gene:GQ26_0102030 gene_biotype:protein_coding transcript_biotype:protein_coding description:hypothetical protein	0	88.6905	0	0	1.75466	Ascomycota	NA	UniRef90_B8M4X6 Uncharacterized protein n=4 Tax=Eurotiales TaxID=5042 RepID=B8M4X6_TALSN	No hit	0	0	1	No hit	0	0	0
AS_DN126954_c0_g1	KFX47853 cds supercontig:ASM75011v1:scf014:641355:642695:-1 gene:GQ26_0142320 gene_biotype:protein_coding transcript_biotype:protein_coding description:Pyridoxal reductase	1e-171	89.7603	0	0	1.75273	Ascomycota	Aldo/keto reductase	UniRef90_B8LW45 Pyridoxal reductase (AKR8), putative n=4 Tax=Eurotiales TaxID=5042 RepID=B8LW45_TALSN	No hit	0	0	1	No hit	0	0	0
AS_DN109543_c0_g1	KFX53684 cds supercontig:ASM75011v1:scf001:1223216:1226030:1 gene:GQ26_0014280 gene_biotype:protein_coding transcript_biotype:protein_coding description:Uncharacterized protein C30D11.14c	4e-176	89.7119	0	0	1.75209	Ascomycota	NA	No hits	No hit	0	0	1	No hit	0	0	0
AS_DN104422_c0_g1	KFX42283 cds supercontig:ASM75011v1:scf046:45042:47438:1 gene:GQ26_0460220 gene_biotype:protein_coding transcript_biotype:protein_coding description:rRNA 2'-O-methyltransferase fibrillarin	0	93.9189	0	0	1.75207	Ascomycota	NA	UniRef90_A0A1D1V2L6 Uncharacterized protein n=1 Tax=Ramazzottius varieornatus TaxID=947166 RepID=A0A1D1V2L6_RAMVA	No hit	0	0	1	No hit	0	0	0
AS_DN88325_c0_g1	GAM42036 cds supercontig:TcelY94_1.0:DF933839.1:321866:323042:-1 gene:TCE0_043r15649 gene_biotype:protein_coding transcript_biotype:protein_coding description:hypothetical protein	0	96.8992	0	0	1.7507	Ascomycota	NA	UniRef90_A0A2H3I2J6 Uncharacterized protein n=2 Tax=Eurotiales TaxID=5042 RepID=A0A2H3I2J6_9EURO	No hit	0	0	1	No hit	0	0	0
AS_DN114497_c0_g1	KFX44926 cds supercontig:ASM75011v1:scf025:96244:100380:1 gene:GQ26_0250360 gene_biotype:protein_coding transcript_biotype:protein_coding description:Transketolase	0	94.4444	0	0	1.74946	Ascomycota	NA	UniRef90_B8M240 Transketolase n=5 Tax=Eurotiales TaxID=5042 RepID=B8M240_TALSN	No hit	0	0	1	No hit	0	0	0
AS_DN2890_c0_g1	KFX44401 cds supercontig:ASM75011v1:scf028:20703:26623:-1 gene:GQ26_0280100 gene_biotype:protein_coding transcript_biotype:protein_coding description:Leptomycin B resistance protein pmd1	3e-167	88.2114	0	0	1.7457	Ascomycota	ATP-binding cassette, subfamily B (MDR/TAP), member 1	UniRef90_B6QGB8 ABC multidrug transporter Mdr1 n=4 Tax=Eurotiales TaxID=5042 RepID=B6QGB8_TALMQ	No hit	0	0	1	No hit	0	gnl|TC-DB|B0Y3B6|3.A.1.201.10 ABC multidrug transporter Mdr1 OS=Aspergillus fumigatus (strain CEA10 / CBS 144.89 / FGSC A1163)GN=AFUB_053630 PE=4 SV=1	93.2927
AS_DN115394_c0_g1	KFX42228 cds supercontig:ASM75011v1:scf047:98191:99852:1 gene:GQ26_0470380 gene_biotype:protein_coding transcript_biotype:protein_coding description:GTP-binding protein ypt1	6e-179	89.9782	0	0	1.74537	Ascomycota	p-loop containing nucleoside triphosphate hydrolase	UniRef90_A1CZN3 Rab15, 13, 10, 1, 35, 5, and n=10 Tax=leotiomyceta TaxID=716546 RepID=A1CZN3_NEOFI	No hit	0	0	1	No hit	0	0	0
AS_DN129137_c0_g1	KFX50372 cds supercontig:ASM75011v1:scf007:328045:330560:1 gene:GQ26_0071160 gene_biotype:protein_coding transcript_biotype:protein_coding description:Serine-type carboxypeptidase F	3e-157	86.0784	0	0	1.74345	Ascomycota	Serine-type carboxypeptidase F	UniRef90_A0A2H3IIC7 Carboxypeptidase n=1 Tax=Penicillium occitanis TaxID=290292 RepID=A0A2H3IIC7_9EURO	No hit	0	0	1	No hit	0	0	0
AS_DN75884_c0_g1	OKL58185 cds supercontig:ASM190759v1:scaffold_9:54777:55196:1 gene:UA08_06396 gene_biotype:protein_coding transcript_biotype:protein_coding description:hypothetical protein	1e-120	88.7006	0	0	1.73923	Ascomycota	Histone chaperone domain CHZ family protein	UniRef90_A0A225AUR8 Uncharacterized protein n=1 Tax=Talaromyces atroroseus TaxID=1441469 RepID=A0A225AUR8_9EURO	No hit	0	0	1	No hit	0	0	0
AS_DN137045_c0_g1	KFX48830 cds supercontig:ASM75011v1:scf011:613189:615808:-1 gene:GQ26_0112060 gene_biotype:protein_coding transcript_biotype:protein_coding description:Tryptophan synthase	3e-106	87.2727	0	0	1.73339	Ascomycota	Tryptophan synthase subunit beta (Fragment)	UniRef90_B8M3L9 Tryptophan synthase n=5 Tax=Eurotiales TaxID=5042 RepID=B8M3L9_TALSN	No hit	0	0	1	No hit	0	0	0
AS_DN5464_c0_g1	KFX47663 cds supercontig:ASM75011v1:scf014:241426:243324:-1 gene:GQ26_0140890 gene_biotype:protein_coding transcript_biotype:protein_coding description:Ammonium transporter 1	2e-132	84.2818	0	0	1.73305	Ascomycota	High-affinity ammonium transporter	UniRef90_A0A093XQZ0 Ammonium transporter n=2 Tax=Talaromyces marneffei TaxID=37727 RepID=A0A093XQZ0_TALMA	No hit	0	0	1	No hit	0	gnl|TC-DB|Q96UY0|1.A.11.3.4 Ammonium transporter - Hebeloma cylindrosporum.	74.7967
AS_DN129084_c0_g1	KFX50307 cds supercontig:ASM75011v1:scf007:196200:198751:-1 gene:GQ26_0070700 gene_biotype:protein_coding transcript_biotype:protein_coding description:Meiotic sister chromatid recombination protein 1	0	88.587	0	0	1.7312	Ascomycota	NA	UniRef90_A0A093VCN1 Meiotic sister chromatid recombination protein 1 n=4 Tax=Eurotiales TaxID=5042 RepID=A0A093VCN1_TALMA	No hit	0	0	1	No hit	0	0	0
AS_DN73633_c0_g1	KFX50062 cds supercontig:ASM75011v1:scf008:620039:623938:-1 gene:GQ26_0082330 gene_biotype:protein_coding transcript_biotype:protein_coding description:Vacuolar import and degradation protein 27	0	89.4569	0	0	1.72543	Ascomycota	Vacuolar import and degradation protein	UniRef90_A0A093VC07 Vacuolar import and degradation protein 27 (Fragment) n=2 Tax=Talaromyces marneffei PM1 TaxID=1077442 RepID=A0A093VC07_TALMA	No hit	0	0	1	No hit	0	0	0
AS_DN65065_c0_g1	KFX48061 cds supercontig:ASM75011v1:scf013:349725:350653:-1 gene:GQ26_0131340 gene_biotype:protein_coding transcript_biotype:protein_coding description:putative ribose 5-phosphate isomerase	2e-154	90.1515	0	0	1.72382	Ascomycota	Ribose 5-phosphate isomerase RpiB	UniRef90_B6QRP1 Ribose-5-phosphate isomerase B, putative n=3 Tax=Eurotiales TaxID=5042 RepID=B6QRP1_TALMQ	No hit	0	0	1	No hit	0	0	0
AS_DN80089_c0_g1	OKL58758 cds supercontig:ASM190759v1:scaffold_7:101693:102862:1 gene:UA08_05488 gene_biotype:protein_coding transcript_biotype:protein_coding description:hypothetical protein	6e-120	81.5261	0	0	1.72318	Ascomycota	Aldo/keto reductase	UniRef90_A0A225AN93 Uncharacterized protein n=1 Tax=Talaromyces atroroseus TaxID=1441469 RepID=A0A225AN93_9EURO	No hit	0	0	1	No hit	0	0	0
AS_DN63929_c0_g1	GAM43501 cds supercontig:TcelY94_1.0:DF933846.1:397175:399707:1 gene:TCE0_050f18365 gene_biotype:protein_coding transcript_biotype:protein_coding description:hypothetical protein	0	98.0874	0	0	1.7182	Ascomycota	NA	UniRef90_A0A093VJI2 Adhesion defective protein 3 n=1 Tax=Talaromyces marneffei PM1 TaxID=1077442 RepID=A0A093VJI2_TALMA	No hit	0	0	1	No hit	0	0	0
AS_DN88209_c0_g1	KFX50043 cds supercontig:ASM75011v1:scf008:586954:589164:1 gene:GQ26_0082190 gene_biotype:protein_coding transcript_biotype:protein_coding description:[PSI+] inducibility protein 3	7e-133	90.3581	0	0	1.71457	Ascomycota	NA	UniRef90_B8MTC0 SH3 domain protein n=5 Tax=Eurotiales TaxID=5042 RepID=B8MTC0_TALSN	No hit	0	0	1	No hit	0	0	0
AS_DN74343_c0_g1	KFX45118 cds supercontig:ASM75011v1:scf025:449796:451194:-1 gene:GQ26_0251800 gene_biotype:protein_coding transcript_biotype:protein_coding description:putative THOC5 family protein	0	86.8827	0	0	1.7109	Ascomycota	THO complex subunit 5	UniRef90_B6QLQ0 Uncharacterized protein n=3 Tax=Eurotiales TaxID=5042 RepID=B6QLQ0_TALMQ	No hit	0	0	1	No hit	0	0	0
AS_DN68227_c0_g1	KFX43081 cds supercontig:ASM75011v1:scf038:127112:128579:-1 gene:GQ26_0380420 gene_biotype:protein_coding transcript_biotype:protein_coding description:ATP synthase subunit gamma, mitochondrial	2e-172	94.5312	0	0	1.70871	Ascomycota	NA	No hits	No hit	0	0	1	No hit	0	0	0
AS_DN112677_c0_g1	EEA24116 cds supercontig:JCVI-PMFA1-2.0:scf_1105668340960:1259607:1262557:-1 gene:PMAA_081270 gene_biotype:protein_coding transcript_biotype:protein_coding description:vacuolar dynamin-like GTPase VpsA, putative	1e-150	91.4729	0	0	1.70561	Ascomycota	NA	UniRef90_B8MBF5 Vacuolar dynamin-like GTPase VpsA, putative n=4 Tax=Eurotiales TaxID=5042 RepID=B8MBF5_TALSN	No hit	0	0	1	No hit	0	0	0
AS_DN61296_c0_g1	EED15998 cds supercontig:JCVI-TSTA1-3.0:scf_1105507295549:649133:652092:1 gene:TSTA_011120 gene_biotype:protein_coding transcript_biotype:protein_coding description:Hsp70 chaperone(HscA), putative	1e-96	79.1398	0	0	1.70341	Ascomycota	NA	UniRef90_A0A0G2GS09 Putative hsp70 chaperone n=1 Tax=Diplodia seriata TaxID=420778 RepID=A0A0G2GS09_9PEZI	Hsp70	0	0	1	No hit	0	gnl|TC-DB|P10591|3.A.16.1.6 Heat shock protein SSA1 OS=Saccharomyces cerevisiae (strain ATCC 204508 / S288c) OX=559292 GN=SSA1 PE=1 SV=4	83.871
AS_DN24134_c0_g1	KFX50976 cds supercontig:ASM75011v1:scf006:635730:637255:1 gene:GQ26_0062420 gene_biotype:protein_coding transcript_biotype:protein_coding description:Meiotically up-regulated gene 65 protein	5e-89	85.2941	0	0	1.70309	Ascomycota	NA	UniRef90_A0A2H3IL17 Uncharacterized protein n=1 Tax=Penicillium occitanis TaxID=290292 RepID=A0A2H3IL17_9EURO	No hit	0	0	1	No hit	0	0	0
AS_DN136031_c0_g1	KFX48060 cds supercontig:ASM75011v1:scf013:347969:349627:-1 gene:GQ26_0131330 gene_biotype:protein_coding transcript_biotype:protein_coding description:STIP1 likey and U box-containing protein 1	9e-107	85.6	0	0	1.70035	Ascomycota	NA	UniRef90_B6QRP2 U-box domain protein, putative n=3 Tax=Eurotiales TaxID=5042 RepID=B6QRP2_TALMQ	No hit	0	0	1	No hit	0	0	0
AS_DN130303_c0_g1	GAM40212 cds supercontig:TcelY94_1.0:DF933834.1:243134:244183:1 gene:TCE0_038f12380 gene_biotype:protein_coding transcript_biotype:protein_coding description:hypothetical protein	0	96.9171	0	0	1.69574	Ascomycota	Eukaryotic translation initiation factor 3 subunit G	UniRef90_B8MC63 Eukaryotic translation initiation factor 3 subunit G n=7 Tax=Eurotiales TaxID=5042 RepID=B8MC63_TALSN	No hit	0	0	1	No hit	0	0	0
AS_DN63783_c0_g1	KFX42143 cds supercontig:ASM75011v1:scf048:46504:50083:-1 gene:GQ26_0480180 gene_biotype:protein_coding transcript_biotype:protein_coding description:Eukaryotic translation initiation factor 5B	0	88.755	0	0	1.69495	Ascomycota	NA	UniRef90_B8MFI6 Mitochondrial translation initiation factor IF-2, putative n=4 Tax=Eurotiales TaxID=5042 RepID=B8MFI6_TALSN	No hit	0	0	1	No hit	0	0	0
AS_DN13944_c0_g1	GAM43352 cds supercontig:TcelY94_1.0:DF933843.1:755183:757837:1 gene:TCE0_047f18092 gene_biotype:protein_coding transcript_biotype:protein_coding description:translation initiation factor	0	97.8166	0	0	1.69116	Ascomycota	NA	UniRef90_B8MAY1 Eukaryotic translation initiation factor 3 subunit C n=6 Tax=Eurotiales TaxID=5042 RepID=B8MAY1_TALSN	No hit	0	0	1	No hit	0	0	0
AS_DN64118_c0_g1	GAM40141 cds supercontig:TcelY94_1.0:DF933834.1:12099:13643:-1 gene:TCE0_038r12257 gene_biotype:protein_coding transcript_biotype:protein_coding description:nucleosome assembly protein	0	98.6733	0.0101698	0	1.69036	Ascomycota	NA	UniRef90_B8MBX5 Nucleosome assembly protein Nap1, putative n=5 Tax=Eurotiales TaxID=5042 RepID=B8MBX5_TALSN	No hit	0.0102235	0	0.999948	No hit	0	0	0
AS_DN121328_c0_g1	OKL59291 cds supercontig:ASM190759v1:scaffold_6:869008:870556:-1 gene:UA08_05223 gene_biotype:protein_coding transcript_biotype:protein_coding description:Aldehyde dehydrogenase	1e-130	80.8889	0	0	1.68399	Ascomycota	NA	UniRef90_A0A225ADN7 Aldehyde dehydrogenase n=1 Tax=Talaromyces atroroseus TaxID=1441469 RepID=A0A225ADN7_9EURO	No hit	0	0	1	No hit	0	0	0
AS_DN34190_c0_g1	OKL58394 cds supercontig:ASM190759v1:scaffold_8:778232:779593:1 gene:UA08_06216 gene_biotype:protein_coding transcript_biotype:protein_coding description:putative RNA-binding protein	2e-84	82.9201	0	0	1.67949	Ascomycota	RNA-binding domain-containing protein (Fragment)	UniRef90_A0A165I2I2 RNA-binding domain-containing protein n=1 Tax=Xylona heveae TC161 TaxID=1328760 RepID=A0A165I2I2_9PEZI	No hit	0	0	1	No hit	0	0	0
AS_DN108250_c0_g1	KFX48177 cds supercontig:ASM75011v1:scf013:619482:621107:-1 gene:GQ26_0132300 gene_biotype:protein_coding transcript_biotype:protein_coding description:RNA polymerase II subunit A C-terminal domain phosphatase ssu72	1e-120	91.195	0	0	1.67165	Ascomycota	RNA polymerase II subunit A domain phosphatase ssu72	UniRef90_B6QNZ6 Transcription/RNA-processing factor Ssu72 n=3 Tax=Eurotiales TaxID=5042 RepID=B6QNZ6_TALMQ	No hit	0	0	1	No hit	0	0	0
AS_DN127623_c0_g1	GAM40194 cds supercontig:TcelY94_1.0:DF933834.1:183846:186600:-1 gene:TCE0_038r12347 gene_biotype:protein_coding transcript_biotype:protein_coding description:hypothetical protein	0	97.3085	0	0	1.66985	Ascomycota	NA	UniRef90_B6QD10 C6 transcription factor (Ctf1B), putative n=3 Tax=Talaromyces marneffei TaxID=37727 RepID=B6QD10_TALMQ	No hit	0	0	1	No hit	0	0	0
AS_DN67881_c0_g1	KFX53487 cds supercontig:ASM75011v1:scf001:814907:817956:-1 gene:GQ26_0012810 gene_biotype:protein_coding transcript_biotype:protein_coding description:putative RING finger protein P8B7.15c	7e-108	81.1475	0	0	1.66531	Ascomycota	Zinc knuckle domain-containing protein	UniRef90_B6Q368 Zinc knuckle domain protein n=6 Tax=Eurotiales TaxID=5042 RepID=B6Q368_TALMQ	No hit	0	0	1	No hit	0	0	0
AS_DN108900_c0_g1	KFX43380 cds supercontig:ASM75011v1:scf036:249531:251166:1 gene:GQ26_0360940 gene_biotype:protein_coding transcript_biotype:protein_coding description:UBX domain-containing protein 1	2e-112	88.9908	0	0	1.66058	Ascomycota	NA	UniRef90_B6QFN2 Cdc48-dependent protein degradation adaptor protein (Shp1), putative n=3 Tax=Eurotiales TaxID=5042 RepID=B6QFN2_TALMQ	No hit	0	0	1	No hit	0	0	0
AS_DN83008_c0_g1	KFX43033 cds supercontig:ASM75011v1:scf038:42818:44403:1 gene:GQ26_0380150 gene_biotype:protein_coding transcript_biotype:protein_coding description:60S acidic ribosomal protein P0	0	94.7126	0	0	1.65939	Ascomycota	60S acidic ribosomal protein P0	UniRef90_B8MH37 60S acidic ribosomal protein P0 n=5 Tax=Eurotiales TaxID=5042 RepID=B8MH37_TALSN	No hit	0	0	1	No hit	0	0	0
AS_DN68735_c0_g1	KFX49296 cds supercontig:ASM75011v1:scf010:785349:786908:1 gene:GQ26_0102770 gene_biotype:protein_coding transcript_biotype:protein_coding description:putative TLC domain-containing protein C17A2.02c	8e-154	87.276	0	0	1.65723	Ascomycota	NA	UniRef90_A0A2H3J159 Uncharacterized protein n=1 Tax=Penicillium occitanis TaxID=290292 RepID=A0A2H3J159_9EURO	No hit	0	0	1	No hit	0	0	0
AS_DN4519_c0_g1	KFX43522 cds supercontig:ASM75011v1:scf035:281020:282877:1 gene:GQ26_0351070 gene_biotype:protein_coding transcript_biotype:protein_coding description:Small glutamine-rich tetratricopeptide repeat-containing protein 2	0	88.181	0	0	1.65608	Ascomycota	Small glutamine-rich tetratricopeptide repeat-containing protein A	UniRef90_B8LUU3 Hsc70 cochaperone (SGT), putative n=4 Tax=Eurotiales TaxID=5042 RepID=B8LUU3_TALSN	No hit	0	0	1	No hit	0	0	0
AS_DN85727_c0_g1	KFX52216 cds supercontig:ASM75011v1:scf003:404111:406342:-1 gene:GQ26_0031460 gene_biotype:protein_coding transcript_biotype:protein_coding description:Acyl-CoA dehydrogenase	6e-169	92.7007	0	0	1.65411	Ascomycota	NA	UniRef90_B8MHU7 Acyl-CoA dehydrogenase, putative n=6 Tax=Eurotiales TaxID=5042 RepID=B8MHU7_TALSN	No hit	0	0	1	No hit	0	0	0
AS_DN25356_c0_g1	KFX45120 cds supercontig:ASM75011v1:scf025:451764:453399:1 gene:GQ26_0251810 gene_biotype:protein_coding transcript_biotype:protein_coding description:Uncharacterized protein C30D11.11	0	88.8112	0	0	1.64932	Ascomycota	NA	UniRef90_B8MGG0 IZH family channel protein (Izh3), putative n=6 Tax=Eurotiales TaxID=5042 RepID=B8MGG0_TALSN	No hit	0	0	1	No hit	0	0	0
AS_DN75795_c0_g1	KFX43015 cds supercontig:ASM75011v1:scf038:489:2154:-1 gene:GQ26_0380010 gene_biotype:protein_coding transcript_biotype:protein_coding description:Small COPII coat GTPase sar1	0	84.6995	0	0	1.6465	Ascomycota	Secretion-associated GTP-binding protein sarA	UniRef90_A0A135LX35 Small GTPase superfamily, ARF/SAR type n=1 Tax=Penicillium patulum TaxID=5078 RepID=A0A135LX35_PENPA	No hit	0	0	1	No hit	0	0	0
AS_DN84779_c0_g1	KFX44705 cds supercontig:ASM75011v1:scf027:322537:328238:-1 gene:GQ26_0271260 gene_biotype:protein_coding transcript_biotype:protein_coding description:Fatty acid synthase subunit alpha	5e-69	74.7573	0	0	1.64615	Ascomycota	NA	UniRef90_A0A0D1Y0G4 Fatty acid synthase subunit alpha n=1 Tax=Verruconis gallopava TaxID=253628 RepID=A0A0D1Y0G4_9PEZI	No hit	0	0	1	No hit	0	0	0
AS_DN63775_c0_g1	KFX48615 cds supercontig:ASM75011v1:scf011:66470:74151:-1 gene:GQ26_0110190 gene_biotype:protein_coding transcript_biotype:protein_coding description:Uncharacterized protein C9E9.04	1e-175	92.1839	0	0	1.64424	Ascomycota	B-cell receptor-associated protein	UniRef90_B8M2V7 BAP31 domain protein, putative n=5 Tax=Talaromyces TaxID=5094 RepID=B8M2V7_TALSN	No hit	0	0	1	No hit	0	0	0
AS_DN26796_c0_g1	KFX42060 cds supercontig:ASM75011v1:scf049:15176:18086:1 gene:GQ26_0490060 gene_biotype:protein_coding transcript_biotype:protein_coding description:Mannitol 2-dehydrogenase	0	86.4327	0	0	1.64319	Ascomycota	NA	UniRef90_A0A2H3IGJ9 Mannitol dehydrogenase n=1 Tax=Penicillium occitanis TaxID=290292 RepID=A0A2H3IGJ9_9EURO	No hit	0	0	1	No hit	0	0	0
AS_DN89384_c0_g1	KFX51465 cds supercontig:ASM75011v1:scf005:749435:755328:-1 gene:GQ26_0052480 gene_biotype:protein_coding transcript_biotype:protein_coding description:GYF domain-containing protein mpd2	2e-127	91.7431	0	0	1.64278	Ascomycota	NA	UniRef90_B8MRM3 GYF domain protein n=3 Tax=Eurotiales TaxID=5042 RepID=B8MRM3_TALSN	No hit	0	0	1	No hit	0	0	0
AS_DN77733_c0_g1	EED21823 cds supercontig:JCVI-TSTA1-3.0:scf_1105507295527:2788070:2790134:-1 gene:TSTA_090620 gene_biotype:protein_coding transcript_biotype:protein_coding description:APSES transcription factor StuA	5e-94	86.4686	0	0	1.64138	Ascomycota	NA	UniRef90_Q8NKF5 Cell pattern formation-associated protein stuA n=5 Tax=Eurotiales TaxID=5042 RepID=STUA_TALMA	No hit	0	0	1	No hit	0	0	0
AS_DN1045_c0_g1	EEA27537 cds supercontig:JCVI-PMFA1-2.0:scf_1105668340764:2381534:2383502:-1 gene:PMAA_024090 gene_biotype:protein_coding transcript_biotype:protein_coding description:glutaredoxin Grx1, putative	2e-127	93.2039	0	0	1.63801	Ascomycota	Chalcone-flavanone isomerase	UniRef90_B8M835 Glutaredoxin Grx1, putative n=1 Tax=Talaromyces stipitatus (strain ATCC 10500 / CBS 375.48 / QM 6759 / NRRL 1006) TaxID=441959 RepID=B8M835_TALSN	No hit	0	0	1	No hit	0	0	0
AS_DN96206_c0_g1	KFX46680 cds supercontig:ASM75011v1:scf018:450360:451789:-1 gene:GQ26_0181620 gene_biotype:protein_coding transcript_biotype:protein_coding description:Monothiol glutaredoxin-3	6e-149	88.8112	0	0	1.63679	Ascomycota	Hydroperoxide and superoxide-radical responsive glutathione-dependent oxidoreductase (Fragment)	UniRef90_A0A093V3A7 Monothiol glutaredoxin-3 n=3 Tax=Eurotiales TaxID=5042 RepID=A0A093V3A7_TALMA	No hit	0	0	1	No hit	0	0	0
AS_DN119312_c0_g1	KFX49923 cds supercontig:ASM75011v1:scf008:323323:325476:-1 gene:GQ26_0081230 gene_biotype:protein_coding transcript_biotype:protein_coding description:Nuclear localization sequence-binding protein	1e-155	91.1111	0	0	1.63321	Ascomycota	NA	UniRef90_B8MT40 Nucleolin protein Nsr1, putative n=1 Tax=Talaromyces stipitatus (strain ATCC 10500 / CBS 375.48 / QM 6759/ NRRL 1006) TaxID=441959 RepID=B8MT40_TALSN	No hit	0	0	1	No hit	0	0	0
AS_DN104458_c0_g1	KFX48024 cds supercontig:ASM75011v1:scf013:253116:254170:1 gene:GQ26_0130980 gene_biotype:protein_coding transcript_biotype:protein_coding description:Phosphatidylglycerol/phosphatidylinositol transfer protein	5e-109	87.963	0	0	1.62915	Ascomycota	Phosphatidylglycerol phosphatidylinositol transfer protein	UniRef90_A0A093VDK0 Phosphatidylglycerol/phosphatidylinositol transfer protein n=3 Tax=Eurotiales TaxID=5042 RepID=A0A093VDK0_TALMA	No hit	0	0	1	No hit	0	0	0
AS_DN130680_c0_g1	CRG91532 cds supercontig:PIS:WF-38-12_scaffold00010:181646:186413:-1 gene:PISL3812_08582 gene_biotype:protein_coding transcript_biotype:protein_coding description:putative RNA-binding protein C23E6,01c	1e-92	80.791	0	0	1.62798	Ascomycota	mRNA binding post-transcriptional regulator	UniRef90_A0A1Y1ZZX9 Uncharacterized protein n=1 Tax=Clohesyomyces aquaticus TaxID=1231657 RepID=A0A1Y1ZZX9_9PLEO	No hit	0	0	1	No hit	0	0	0
AS_DN60691_c0_g1	GAM40212 cds supercontig:TcelY94_1.0:DF933834.1:243134:244183:1 gene:TCE0_038f12380 gene_biotype:protein_coding transcript_biotype:protein_coding description:hypothetical protein	4e-149	98.0198	0	0	1.62754	Ascomycota	Eukaryotic translation initiation factor 3 subunit G	UniRef90_B8MC63 Eukaryotic translation initiation factor 3 subunit G n=7 Tax=Eurotiales TaxID=5042 RepID=B8MC63_TALSN	No hit	0	0	1	No hit	0	0	0
AS_DN92951_c0_g1	KFX50960 cds supercontig:ASM75011v1:scf006:598602:600842:1 gene:GQ26_0062270 gene_biotype:protein_coding transcript_biotype:protein_coding description:Biofilm and cell wall regulator 1	8e-148	88.9688	0	0	1.62742	Ascomycota	NA	UniRef90_B8LUS8 C2H2 transcription factor, putative n=4 Tax=Eurotiales TaxID=5042 RepID=B8LUS8_TALSN	No hit	0	0	1	No hit	0	0	0
AS_DN104337_c0_g1	KFX47808 cds supercontig:ASM75011v1:scf014:540476:541977:1 gene:GQ26_0141990 gene_biotype:protein_coding transcript_biotype:protein_coding description:S-adenosylmethionine synthase	5e-79	84.1584	0	0	1.62503	Ascomycota	NA	No hits	No hit	0	0	1	No hit	0	0	0
AS_DN135178_c0_g1	KFX53464 cds supercontig:ASM75011v1:scf001:775463:779089:-1 gene:GQ26_0012680 gene_biotype:protein_coding transcript_biotype:protein_coding description:Pre-mRNA-splicing factor prp1	5e-134	91.8129	0	0	1.62461	Ascomycota	Pre-mRNA splicing factor prp1	UniRef90_B8LT79 mRNA splicing factor (Prp1/Zer1), putative n=4 Tax=Talaromyces TaxID=5094 RepID=B8LT79_TALSN	No hit	0	0	1	No hit	0	0	0
AS_DN100045_c0_g1	KFX49923 cds supercontig:ASM75011v1:scf008:323323:325476:-1 gene:GQ26_0081230 gene_biotype:protein_coding transcript_biotype:protein_coding description:Nuclear localization sequence-binding protein	1e-125	88.9807	0	0	1.62446	Ascomycota	NA	UniRef90_A0A093XXC8 Nuclear localization sequence-binding protein n=1 Tax=Talaromyces marneffei PM1 TaxID=1077442 RepID=A0A093XXC8_TALMA	No hit	0	0	1	No hit	0	0	0
AS_DN117392_c0_g1	KFX42651 cds supercontig:ASM75011v1:scf042:129296:137051:-1 gene:GQ26_0420480 gene_biotype:protein_coding transcript_biotype:protein_coding description:Pre-mRNA-processing-splicing factor 8	0	91.6345	0	0	1.622	Ascomycota	NA	UniRef90_C6H9U2 Pre-mRNA processing splicing factor 8 n=1 Tax=Ajellomyces capsulatus (strain H143) TaxID=544712 RepID=C6H9U2_AJECH	No hit	0	0	1	No hit	0	0	0
AS_DN103981_c0_g1	KFX53629 cds supercontig:ASM75011v1:scf001:1131719:1133575:1 gene:GQ26_0013960 gene_biotype:protein_coding transcript_biotype:protein_coding description:Mitochondrial outer membrane protein porin	1e-165	97.3684	0	0	1.62068	Ascomycota	NA	UniRef90_F2Q1V9 Porin n=1 Tax=Trichophyton equinum (strain ATCC MYA-4606 / CBS 127.97) TaxID=559882 RepID=F2Q1V9_TRIEC	No hit	0	0	1	No hit	0	gnl|TC-DB|P07144|1.B.8.1.20 Mitochondrial outer membrane protein porin OS=Neurospora crassa (strain ATCC 24698 / 74-OR23-1A/ CBS 708.71 / DSM 1257 / FGSC 987) OX=367110 GN=B7H23.070 PE=2 SV=1	87.7193
AS_DN78779_c0_g1	EEA25285 cds supercontig:JCVI-PMFA1-2.0:scf_1105668340758:621429:623622:1 gene:PMAA_064010 gene_biotype:protein_coding transcript_biotype:protein_coding description:conserved hypothetical protein	5e-144	90.8136	0	0	1.61274	Ascomycota	NA	UniRef90_A0A2H3IMW4 Reticulon-like protein n=2 Tax=Eurotiales TaxID=5042 RepID=A0A2H3IMW4_9EURO	No hit	0	0	1	No hit	0	0	0
AS_DN60733_c0_g1	CRG87149 cds supercontig:PIS:WF-38-12_scaffold00003:1610801:1612789:-1 gene:PISL3812_04165 gene_biotype:protein_coding transcript_biotype:protein_coding description:ATP-binding cassette,sub-family F, member 2	5e-97	74.1765	0	0	1.60843	Ascomycota	NA	UniRef90_A0A0D2ANJ0 ABC transporter ATP-binding protein ARB1 n=1 Tax=Verruconis gallopava TaxID=253628 RepID=A0A0D2ANJ0_9PEZI	No hit	0	0	1	No hit	0	0	0
AS_DN79210_c0_g1	EEA21309 cds supercontig:JCVI-PMFA1-2.0:scf_1105668340984:278888:279924:-1 gene:PMAA_051200 gene_biotype:protein_coding transcript_biotype:protein_coding description:6-phosphogluconolactonase,putative	0	89.81	0	0	1.60761	Ascomycota	Glucosamine/galactosamine-6-phosphate isomerase	UniRef90_A0A2H3IBH0 Glucosamine/galactosamine-6-phosphate isomerase n=2 Tax=Eurotiales TaxID=5042 RepID=A0A2H3IBH0_9EURO	No hit	0	0	1	No hit	0	0	0
AS_DN100806_c0_g1	GAM43139 cds supercontig:TcelY94_1.0:DF933843.1:127452:128501:-1 gene:TCE0_047r17709 gene_biotype:protein_coding transcript_biotype:protein_coding description:hypothetical protein	9e-166	99.3769	0	0	1.6076	Ascomycota	NA	UniRef90_A0A2H3IEU2 Uncharacterized protein n=2 Tax=Eurotiales TaxID=5042 RepID=A0A2H3IEU2_9EURO	No hit	0	0	1	No hit	0	0	0
AS_DN88770_c0_g1	KFX48403 cds supercontig:ASM75011v1:scf012:336320:339762:-1 gene:GQ26_0121200 gene_biotype:protein_coding transcript_biotype:protein_coding description:putative ubiquitination network signaling protein acrB	1e-135	88.2206	0	0	1.60702	Ascomycota	NA	UniRef90_B8LXL6 Ubiquitination network signaling protein, putative n=4 Tax=Eurotiales TaxID=5042 RepID=B8LXL6_TALSN	No hit	0	0	1	No hit	0	0	0
AS_DN101801_c0_g1	KFX49207 cds supercontig:ASM75011v1:scf010:610262:615766:1 gene:GQ26_0102120 gene_biotype:protein_coding transcript_biotype:protein_coding description:Multifunctional CCA protein	0	91.3399	0	0	1.59848	Ascomycota	Arsenical pump-driving ATPase	UniRef90_K2S0L7 ATPase GET3 n=6 Tax=Fungi TaxID=4751 RepID=K2S0L7_MACPH	No hit	0	0	1	No hit	0	gnl|TC-DB|O43681|3.A.19.1.1 Arsenical pump-driving ATPase - Homo sapiens (Human).	72.549
AS_DN61238_c0_g1	KFX52352 cds supercontig:ASM75011v1:scf003:680504:684360:1 gene:GQ26_0032400 gene_biotype:protein_coding transcript_biotype:protein_coding description:O-glycoside alpha-1,2-mannosyltransferase like 4	2e-117	88.4181	0	0	1.5938	Ascomycota	NA	UniRef90_A0A1Q5Q811 Uncharacterized protein n=1 Tax=Talaromyces atroroseus TaxID=1441469 RepID=A0A1Q5Q811_9EURO	No hit	0	0	1	No hit	0	0	0
AS_DN89520_c0_g1	OKL58432 cds supercontig:ASM190759v1:scaffold_8:566195:567442:1 gene:UA08_06146 gene_biotype:protein_coding transcript_biotype:protein_coding description:hypothetical protein	4e-177	86.7754	0	0	1.59298	Ascomycota	NA	UniRef90_A0A225ABQ1 Uncharacterized protein n=1 Tax=Talaromyces atroroseus TaxID=1441469 RepID=A0A225ABQ1_9EURO	No hit	0	0	1	GH93(2-124)	0	0	0
AS_DN91834_c0_g1	KFX48403 cds supercontig:ASM75011v1:scf012:336320:339762:-1 gene:GQ26_0121200 gene_biotype:protein_coding transcript_biotype:protein_coding description:putative ubiquitination network signaling protein acrB	1e-130	91.2281	0	0	1.59272	Ascomycota	NA	UniRef90_A0A225ALD1 Putative ubiquitination network signaling protein acrB n=1 Tax=Talaromyces atroroseus TaxID=1441469 RepID=A0A225ALD1_9EURO	Hsp70	0	0	1	No hit	0	0	0
AS_DN807_c1_g1	KFX52894 cds supercontig:ASM75011v1:scf002:804630:807492:1 gene:GQ26_0022850 gene_biotype:protein_coding transcript_biotype:protein_coding description:putative fumarate reductase	0	93.9394	0	0	1.58752	Ascomycota	NA	UniRef90_B6QUG6 Fumarate reductase Osm1, putative n=3 Tax=Talaromyces TaxID=5094 RepID=B6QUG6_TALMQ	No hit	0	0	1	No hit	0	0	0
AS_DN107289_c0_g1	KFX44986 cds supercontig:ASM75011v1:scf025:221371:222982:-1 gene:GQ26_0250860 gene_biotype:protein_coding transcript_biotype:protein_coding description:Transcriptional factor SWI5	0	91.1647	0	0	1.57875	Ascomycota	Zinc finger C2H2-type/integrase DNA-binding domain	UniRef90_B8M286 C2H2 transcription factor, putative n=4 Tax=Eurotiales TaxID=5042 RepID=B8M286_TALSN	No hit	0	0	1	No hit	0	0	0
AS_DN122002_c0_g1	KFX45742 cds supercontig:ASM75011v1:scf022:393985:395919:1 gene:GQ26_0221290 gene_biotype:protein_coding transcript_biotype:protein_coding description:Single-stranded TG1-3 DNA-binding protein	1e-144	94.4444	0	0	1.57828	Ascomycota	NA	UniRef90_A0A093UZM4 Single-stranded TG1-3 DNA-binding protein n=5 Tax=Eurotiales TaxID=5042 RepID=A0A093UZM4_TALMA	No hit	0	0	1	No hit	0	0	0
AS_DN104419_c0_g1	KFX47041 cds supercontig:ASM75011v1:scf016:251251:256820:-1 gene:GQ26_0160910 gene_biotype:protein_coding transcript_biotype:protein_coding description:putative phospholipid-transporting ATPase DNF3	3e-62	80.0926	0	0	1.57806	Ascomycota	NA	UniRef90_A0A2H3IMR8 Phospholipid-transporting ATPase n=1 Tax=Penicillium occitanis TaxID=290292 RepID=A0A2H3IMR8_9EURO	No hit	0	0	1	No hit	0	0	0
AS_DN114831_c0_g1	KFX41735 cds supercontig:ASM75011v1:scf054:8860:10754:1 gene:GQ26_0540060 gene_biotype:protein_coding transcript_biotype:protein_coding description:Lysophospholipase nte1	0	82.7506	0	0	1.57499	Ascomycota	Cation-transporting ATPase 4	UniRef90_A0A2H3IBD0 Uncharacterized protein n=1 Tax=Penicillium occitanis TaxID=290292 RepID=A0A2H3IBD0_9EURO	No hit	0	0	1	No hit	0	0	0
AS_DN86885_c0_g1	KFX45212 cds supercontig:ASM75011v1:scf024:217331:218188:-1 gene:GQ26_0240680 gene_biotype:protein_coding transcript_biotype:protein_coding description:60S ribosomal protein L26-1	0	97.7778	0	0	1.57051	Ascomycota	Large subunit ribosomal protein L26e	UniRef90_B8MES2 Ribosomal protein L26 n=4 Tax=Eurotiales TaxID=5042 RepID=B8MES2_TALSN	No hit	0	0	1	No hit	0	0	0
AS_DN82617_c0_g1	KFX53566 cds supercontig:ASM75011v1:scf001:965538:969037:-1 gene:GQ26_0013370 gene_biotype:protein_coding transcript_biotype:protein_coding description:ABC1 family protein C15C4.02	4e-115	86.5591	0	0	1.56978	Ascomycota	NA	UniRef90_B8LTT2 Ubiquinone biosynthesis protein, putative n=2 Tax=Eurotiales TaxID=5042 RepID=B8LTT2_TALSN	No hit	0	0	1	No hit	0	0	0
AS_DN101387_c0_g1	KFX50221 cds supercontig:ASM75011v1:scf007:5032:11937:-1 gene:GQ26_0070020 gene_biotype:protein_coding transcript_biotype:protein_coding description:Serine/threonine-protein kinase SCH9	2e-147	91.7333	0	0	1.56819	Ascomycota	NA	UniRef90_B6Q3R7 Non-specific serine/threonine protein kinase n=2 Tax=Talaromyces marneffei TaxID=37727 RepID=B6Q3R7_TALMQ	No hit	0	0	1	No hit	0	0	0
AS_DN60591_c0_g1	KFX41654 cds supercontig:ASM75011v1:scf056:104474:108097:-1 gene:GQ26_0560380 gene_biotype:protein_coding transcript_biotype:protein_coding description:putative RING finger protein	0	89.5349	0	0	1.56594	Ascomycota	RING-type E3 ubiquitin transferase	UniRef90_A0A2H3HXH5 RBR-type E3 ubiquitin transferase n=1 Tax=Penicillium occitanis TaxID=290292 RepID=A0A2H3HXH5_9EURO	No hit	0	0	1	No hit	0	0	0
AS_DN92327_c0_g1	GAM33390 cds supercontig:TcelY94_1.0:DF933800.1:235512:238009:1 gene:TCE0_004f00252 gene_biotype:protein_coding transcript_biotype:protein_coding description:hypothetical protein	0	94.5637	0	0	1.56472	Ascomycota	NA	UniRef90_A0A2H3IW70 Transcription factor n=2 Tax=Eurotiales TaxID=5042 RepID=A0A2H3IW70_9EURO	No hit	0	0	1	No hit	0	0	0
AS_DN136681_c0_g1	KFX47709 cds supercontig:ASM75011v1:scf014:340083:344035:-1 gene:GQ26_0141190 gene_biotype:protein_coding transcript_biotype:protein_coding description:Endopolyphosphatase	1e-109	87.9056	0	0.0677145	1.56412	Ascomycota	NA	UniRef90_A0A2H3I023 Endopolyphosphatase n=1 Tax=Penicillium occitanis TaxID=290292 RepID=A0A2H3I023_9EURO	No hit	0	0.0694151	0.997588	No hit	0	0	0
AS_DN98131_c0_g1	EEA24038 cds supercontig:JCVI-PMFA1-2.0:scf_1105668340960:1051405:1055285:1 gene:PMAA_080560 gene_biotype:protein_coding transcript_biotype:protein_coding description:SNF2 family helicase/ATPase,putative	5e-129	88.9807	0	0	1.56314	Ascomycota	NA	UniRef90_B6QEV1 SNF2 family helicase/ATPase, putative n=1 Tax=Talaromyces marneffei (strain ATCC 18224 / CBS 334.59 / QM 7333) TaxID=441960 RepID=B6QEV1_TALMQ	No hit	0	0	1	No hit	0	0	0
AS_DN866_c0_g1	KFX46209 cds supercontig:ASM75011v1:scf020:449800:453174:1 gene:GQ26_0201600 gene_biotype:protein_coding transcript_biotype:protein_coding description:Transcriptional regulator prz1	0	88.3333	0	0	1.55758	Ascomycota	Specific RNA polymerase II transcription factor	UniRef90_A0A093V8A5 Transcriptional regulator prz1 n=1 Tax=Talaromyces marneffei PM1 TaxID=1077442 RepID=A0A093V8A5_TALMA	No hit	0	0	1	No hit	0	0	0
AS_DN60031_c0_g1	GAM37380 cds supercontig:TcelY94_1.0:DF933819.1:518238:520165:1 gene:TCE0_023f07257 gene_biotype:protein_coding transcript_biotype:protein_coding description:protein phosphatase subunit	0	95.5782	0	0	1.5421	Ascomycota	NA	UniRef90_A0A2H3I8A4 Uncharacterized protein n=2 Tax=Eurotiales TaxID=5042 RepID=A0A2H3I8A4_9EURO	No hit	0	0	1	No hit	0	0	0
AS_DN77641_c0_g1	KFX49197 cds supercontig:ASM75011v1:scf010:594470:600849:1 gene:GQ26_0102070 gene_biotype:protein_coding transcript_biotype:protein_coding description:putative cation-transporting ATPase 1	1e-170	91.4943	0	0	1.5421	Ascomycota	NA	UniRef90_A0A093V9I1 Cation-transporting ATPase n=4 Tax=Talaromyces TaxID=5094 RepID=A0A093V9I1_TALMA	No hit	0	0	1	No hit	0	0	0
AS_DN101996_c0_g1	EEA24041 cds supercontig:JCVI-PMFA1-2.0:scf_1105668340960:1061962:1063439:1 gene:PMAA_080590 gene_biotype:protein_coding transcript_biotype:protein_coding description:aspartic endopeptidase(AP1), putative	1e-120	88.2514	0	0	1.54081	Ascomycota	NA	UniRef90_A0A2H3J9S0 Peptidase aspartic, catalytic n=1 Tax=Penicillium occitanis TaxID=290292 RepID=A0A2H3J9S0_9EURO	No hit	0	0	1	No hit	0	0	0
AS_DN112767_c0_g1	KFX41311 cds supercontig:ASM75011v1:scf063:11838:12659:-1 gene:GQ26_0630030 gene_biotype:protein_coding transcript_biotype:protein_coding description:SAP domain-containing ribonucleoprotein	3e-107	84.5238	0	0	1.5403	Ascomycota	NA	UniRef90_A0A2H3J0G7 DNA-binding SAP n=4 Tax=Eurotiales TaxID=5042 RepID=A0A2H3J0G7_9EURO	No hit	0	0	1	No hit	0	0	0
AS_DN23024_c0_g1	KFX41800 cds supercontig:ASM75011v1:scf053:17116:19451:-1 gene:GQ26_0530070 gene_biotype:protein_coding transcript_biotype:protein_coding description:Large subunit GTPase 1	2e-112	89.1975	0	0	1.53128	Ascomycota	NA	UniRef90_A0A2H3IHX7 Uncharacterized protein n=1 Tax=Penicillium occitanis TaxID=290292 RepID=A0A2H3IHX7_9EURO	No hit	0	0	1	No hit	0	0	0
AS_DN61918_c0_g1	KFX47485 cds supercontig:ASM75011v1:scf015:584288:585997:-1 gene:GQ26_0151940 gene_biotype:protein_coding transcript_biotype:protein_coding description:Chromatin modification-related protein YNG2	2e-112	91.1765	0	0	1.52961	Ascomycota	NA	UniRef90_B6Q8X0 Chromatin modification-related protein n=4 Tax=Eurotiales TaxID=5042 RepID=B6Q8X0_TALMQ	No hit	0	0	1	No hit	0	0	0
AS_DN119942_c0_g1	CRG92100 cds supercontig:PIS:WF-38-12_scaffold00011:673113:674410:-1 gene:PISL3812_09155 gene_biotype:protein_coding transcript_biotype:protein_coding description:Reticulon-4-interacting protein 1, mitochondrial	0	89.211	0	0	1.52579	Ascomycota	Alcohol dehydrogenase zinc-type	UniRef90_A0A2H3IIG6 Alcohol dehydrogenase superfamily, zinc-type n=1 Tax=Penicillium occitanis TaxID=290292 RepID=A0A2H3IIG6_9EURO	No hit	0	0	1	No hit	0	0	0
AS_DN23657_c0_g1	KFX44475 cds supercontig:ASM75011v1:scf028:184406:185708:-1 gene:GQ26_0280690 gene_biotype:protein_coding transcript_biotype:protein_coding description:AN1-type zinc finger protein 1	0	87.1622	0	0	1.52446	Ascomycota	AN1-type zinc finger protein 1	UniRef90_A0A093UX44 AN1-type zinc finger protein 1 n=3 Tax=Eurotiales TaxID=5042 RepID=A0A093UX44_TALMA	No hit	0	0	1	No hit	0	0	0
AS_DN78103_c0_g1	EED24090 cds supercontig:JCVI-TSTA1-3.0:scf_1105507295523:4146389:4149095:-1 gene:TSTA_074680 gene_biotype:protein_coding transcript_biotype:protein_coding description:conserved hypothetical protein	2e-77	83.1746	0	0	1.52326	Ascomycota	NA	UniRef90_A0A2H3IFQ4 Uncharacterized protein n=1 Tax=Penicillium occitanis TaxID=290292 RepID=A0A2H3IFQ4_9EURO	No hit	0	0	1	No hit	0	0	0
AS_DN130331_c0_g1	KFX42145 cds supercontig:ASM75011v1:scf048:52229:54474:1 gene:GQ26_0480200 gene_biotype:protein_coding transcript_biotype:protein_coding description:putative cardiolipin-specific deacylase,mitochondrial	4e-110	88.5802	0	0	1.52305	Ascomycota	NA	UniRef90_B8MFI4 Alpha/beta hydrolase, putative n=4 Tax=Eurotiales TaxID=5042 RepID=B8MFI4_TALSN	No hit	0	0	1	No hit	0	0	0
AS_DN134949_c0_g1	KFX44277 cds supercontig:ASM75011v1:scf029:83387:87199:1 gene:GQ26_0290250 gene_biotype:protein_coding transcript_biotype:protein_coding description:hypothetical protein	2e-132	92.9012	0	0	1.52015	Ascomycota	NA	UniRef90_A0A2H3IP73 Uncharacterized protein n=1 Tax=Penicillium occitanis TaxID=290292 RepID=A0A2H3IP73_9EURO	No hit	0	0	1	No hit	0	0	0
AS_DN67088_c0_g1	KFX41650 cds supercontig:ASM75011v1:scf056:94537:96954:1 gene:GQ26_0560340 gene_biotype:protein_coding transcript_biotype:protein_coding description:Alpha,alpha-trehalose-phosphate synthase [UDP-forming] 1	2e-87	79.941	0	0	1.51926	Ascomycota	Alpha,alpha-trehalose-phosphate synthase [UDP-forming]	UniRef90_A0A093UNZ1 Alpha,alpha-trehalose-phosphate synthase [UDP-forming] 1 n=1 Tax=Talaromyces marneffei PM1 TaxID=1077442 RepID=A0A093UNZ1_TALMA	No hit	0	0	1	No hit	0	0	0
AS_DN102788_c0_g1	KFX42201 cds supercontig:ASM75011v1:scf047:26092:28268:1 gene:GQ26_0470140 gene_biotype:protein_coding transcript_biotype:protein_coding description:SWIRM domain-containing protein FUN19	5e-89	82.6087	0	0	1.51915	Ascomycota	NA	UniRef90_B8MIK5 SWIRM domain protein Fun19, putative n=4 Tax=Eurotiales TaxID=5042 RepID=B8MIK5_TALSN	No hit	0	0	1	No hit	0	0	0
AS_DN807_c0_g1	OKL58599 cds supercontig:ASM190759v1:scaffold_8:394204:396364:-1 gene:UA08_06091 gene_biotype:protein_coding transcript_biotype:protein_coding description:hypothetical protein	1e-85	82.0106	0	0	1.51905	Ascomycota	NA	UniRef90_A0A1Y2AA02 Fumarate reductase-like protein n=1 Tax=Clohesyomyces aquaticus TaxID=1231657 RepID=A0A1Y2AA02_9PLEO	No hit	0	0	1	No hit	0	0	0
AS_DN63672_c0_g1	KFX47658 cds supercontig:ASM75011v1:scf014:226497:231419:1 gene:GQ26_0140830 gene_biotype:protein_coding transcript_biotype:protein_coding description:Calcium-transporting ATPase 2	3e-137	87.1795	0	0	1.5176	Ascomycota	NA	UniRef90_B8LVL7 Calcium-transporting ATPase n=4 Tax=Eurotiales TaxID=5042 RepID=B8LVL7_TALSN	No hit	0	0	1	No hit	0	0	0
AS_DN96823_c0_g1	EEA20350 cds supercontig:JCVI-PMFA1-2.0:scf_1105668340738:870803:872638:1 gene:PMAA_041970 gene_biotype:protein_coding transcript_biotype:protein_coding description:iron-sulfur cluster assembly associated protein Nar1, putative	1e-136	87.6812	0	0.0310359	1.51475	Ascomycota	NA	UniRef90_B6QQH9 Cytosolic Fe-S cluster assembly factor nar1 n=2 Tax=Eurotiales TaxID=5042 RepID=NAR1_TALMQ	No hit	0	0.0331253	0.999451	No hit	0	0	0
AS_DN138738_c0_g1	KFX48639 cds supercontig:ASM75011v1:scf011:140041:142247:-1 gene:GQ26_0110410 gene_biotype:protein_coding transcript_biotype:protein_coding description:Transcription initiation factor IIA large subunit	5e-104	86.8421	0	0	1.51346	Ascomycota	Transcription initiation factor TFIIA large subunit	UniRef90_A0A225ADF9 Uncharacterized protein n=1 Tax=Talaromyces atroroseus TaxID=1441469 RepID=A0A225ADF9_9EURO	No hit	0	0	1	No hit	0	0	0
AS_DN120907_c0_g1	EED15616 cds supercontig:JCVI-TSTA1-3.0:scf_1105507295515:2731326:2734900:-1 gene:TSTA_050550 gene_biotype:protein_coding transcript_biotype:protein_coding description:translation elongation factor eEF-3, putative	0	94.0639	0	0	1.51339	Ascomycota	NA	UniRef90_B8MIV4 Translation elongation factor eEF-3, putative n=6 Tax=Eurotiales TaxID=5042 RepID=B8MIV4_TALSN	No hit	0	0	1	No hit	0	0	0
AS_DN25258_c0_g1	EEA28404 cds supercontig:JCVI-PMFA1-2.0:scf_1105668340764:4582197:4584033:-1 gene:PMAA_032170 gene_biotype:protein_coding transcript_biotype:protein_coding description:conserved hypothetical protein	0	88.8485	0	0	1.51114	Ascomycota	NA	UniRef90_B6Q585 Uncharacterized protein n=1 Tax=Talaromyces marneffei (strain ATCC 18224 / CBS 334.59 / QM 7333) TaxID=441960 RepID=B6Q585_TALMQ	No hit	0	0	1	No hit	0	0	0
AS_DN121515_c0_g1	KFX43736 cds supercontig:ASM75011v1:scf033:205794:207250:1 gene:GQ26_0330680 gene_biotype:protein_coding transcript_biotype:protein_coding description:Ras-related protein Rab-11A	5e-174	94.5736	0	0	1.50892	Ascomycota	GTP binding	UniRef90_A0A225BCH0 Ras-related protein Rab-11A n=2 Tax=Talaromyces TaxID=5094 RepID=A0A225BCH0_9EURO	No hit	0	0	1	No hit	0	0	0
AS_DN128865_c0_g1	GAM33428 cds supercontig:TcelY94_1.0:DF933800.1:341817:343918:-1 gene:TCE0_004r00312 gene_biotype:protein_coding transcript_biotype:protein_coding description:mitochondrial heat shock protein	0	95.9596	0	0	1.50871	Ascomycota	NA	UniRef90_A0A093V458 Heat shock protein 60 n=1 Tax=Talaromyces marneffei PM1 TaxID=1077442 RepID=A0A093V458_TALMA	Hsp60	0	0	1	No hit	0	0	0
AS_DN99007_c0_g1	CRG90370 cds supercontig:PIS:WF-38-12_scaffold00007:1914585:1916033:-1 gene:PISL3812_07414 gene_biotype:protein_coding transcript_biotype:protein_coding description:Mitochondrial protein import protein MAS5	7e-38	72.6984	0	0	1.50765	Ascomycota	NA	UniRef90_A0A1Y2AAC2 Uncharacterized protein n=1 Tax=Clohesyomyces aquaticus TaxID=1231657 RepID=A0A1Y2AAC2_9PLEO	DnaJ	0	0	1	No hit	0	0	0
AS_DN88920_c0_g1	KFX50043 cds supercontig:ASM75011v1:scf008:586954:589164:1 gene:GQ26_0082190 gene_biotype:protein_coding transcript_biotype:protein_coding description:[PSI+] inducibility protein 3	4e-150	91.2698	0	0	1.507	Ascomycota	NA	UniRef90_B8MTC0 SH3 domain protein n=5 Tax=Eurotiales TaxID=5042 RepID=B8MTC0_TALSN	No hit	0	0	1	No hit	0	0	0
AS_DN65671_c0_g1	EED21035 cds supercontig:JCVI-TSTA1-3.0:scf_1105507295527:591057:594625:1 gene:TSTA_082680 gene_biotype:protein_coding transcript_biotype:protein_coding description:importin beta-4 subunit, putative	4e-104	89.3333	0	0	1.50416	Ascomycota	NA	UniRef90_B8M193 Importin beta-4 subunit, putative n=5 Tax=Eurotiales TaxID=5042 RepID=B8M193_TALSN	No hit	0	0	1	No hit	0	0	0
AS_DN10205_c0_g1	EEA24247 cds supercontig:JCVI-PMFA1-2.0:scf_1105668340960:1609540:1611502:-1 gene:PMAA_082530 gene_biotype:protein_coding transcript_biotype:protein_coding description:aldehyde reductase(AKR1), putative	9e-127	88.2667	0	0	1.49497	Ascomycota	NA	UniRef90_B6QFL2 Aldehyde reductase (AKR1), putative n=2 Tax=Eurotiales TaxID=5042 RepID=B6QFL2_TALMQ	No hit	0	0	1	No hit	0	0	0
AS_DN76219_c0_g1	KFX48042 cds supercontig:ASM75011v1:scf013:301832:304641:-1 gene:GQ26_0131150 gene_biotype:protein_coding transcript_biotype:protein_coding description:Developmental regulator flbA	5e-109	88.9968	0	0	1.48809	Ascomycota	Developmental regulator flbA	UniRef90_A0A0U1LVL0 Developmental regulator flbA n=1 Tax=Talaromyces islandicus TaxID=28573 RepID=A0A0U1LVL0_TALIS	No hit	0	0	1	No hit	0	0	0
AS_DN91186_c0_g1	KFX43796 cds supercontig:ASM75011v1:scf032:44699:47103:-1 gene:GQ26_0320190 gene_biotype:protein_coding transcript_biotype:protein_coding description:Alkaline protease 2	0	94.5055	0.0212312	0	1.48528	Ascomycota	Serine protease (Fragment)	UniRef90_B8MD40 Autophagic serine protease Alp2 n=5 Tax=Eurotiales TaxID=5042 RepID=B8MD40_TALSN	No hit	0.0230709	0	0.999734	No hit	0	0	0
AS_DN70216_c0_g1	EEA28261 cds supercontig:JCVI-PMFA1-2.0:scf_1105668340764:4200942:4202123:1 gene:PMAA_030770 gene_biotype:protein_coding transcript_biotype:protein_coding description:peroxisomal biogenesis factor (PEX11), putative	1e-99	85.5346	0	0.076505	1.48323	Ascomycota	NA	UniRef90_B8LY60 Peroxisomal biogenesis factor (PEX11), putative n=2 Tax=Talaromyces TaxID=5094 RepID=B8LY60_TALSN	No hit	0	0.0807848	0.996732	No hit	0	0	0
AS_DN69416_c0_g1	KFX45727 cds supercontig:ASM75011v1:scf022:357066:359842:1 gene:GQ26_0221160 gene_biotype:protein_coding transcript_biotype:protein_coding description:ABC transporter ATP-binding protein ARB1	4e-144	96.4401	0.083414	0	1.48215	Ascomycota	NA	UniRef90_A0A093UZL0 ABC transporter ATP-binding protein ARB1 n=1 Tax=Talaromyces marneffei PM1 TaxID=1077442 RepID=A0A093UZL0_TALMA	No hit	0.0877855	0	0.996139	No hit	0	gnl|TC-DB|Q9FJH6|3.A.1.121.10 ABC transporter F family member 1 OS=Arabidopsis thaliana OX=3702 GN=ABCF1 PE=2 SV=1	79.6117
AS_DN98435_c0_g1	GAM43326 cds supercontig:TcelY94_1.0:DF933843.1:683937:684758:-1 gene:TCE0_047r18050 gene_biotype:protein_coding transcript_biotype:protein_coding description:hypothetical protein	0	96.648	0	0.0808975	1.4818	Ascomycota	NA	UniRef90_B6QE59 Uncharacterized protein n=4 Tax=Eurotiales TaxID=5042 RepID=B6QE59_TALMQ	No hit	0	0.0852693	0.996358	No hit	0	0	0
AS_DN69860_c0_g1	KFX42243 cds supercontig:ASM75011v1:scf047:130676:134399:-1 gene:GQ26_0470490 gene_biotype:protein_coding transcript_biotype:protein_coding description:Rpb7-binding protein seb1	2e-82	84.058	0	0	1.48133	Ascomycota	NA	UniRef90_A0A2H3IJK6 Nucleotide-binding, alpha-beta plait n=1 Tax=Penicillium occitanis TaxID=290292 RepID=A0A2H3IJK6_9EURO	No hit	0	0	1	No hit	0	0	0
AS_DN65954_c0_g1	KFX46456 cds supercontig:ASM75011v1:scf019:455496:458496:-1 gene:GQ26_0191780 gene_biotype:protein_coding transcript_biotype:protein_coding description:Heat shock protein hsp98	6e-64	75.6614	0	0	1.47964	Ascomycota	NA	UniRef90_A0A0L1HE66 Heat shock protein n=15 Tax=Pleosporineae TaxID=715340 RepID=A0A0L1HE66_9PLEO	Hsp100	0	0	1	No hit	0	gnl|TC-DB|Q9FI56|3.A.9.1.2 Chaperone protein ClpC1, chloroplastic OS=Arabidopsis thaliana GN=CLPC1 PE=1 SV=1	80.1587
AS_DN79666_c0_g1	GAM33551 cds supercontig:TcelY94_1.0:DF933807.1:219535:220077:1 gene:TCE0_011f00524 gene_biotype:protein_coding transcript_biotype:protein_coding description:hypothetical protein	0	93.2264	0	0	1.47875	Ascomycota	Chitinase	UniRef90_A0A0B8N3X8 Uncharacterized protein n=2 Tax=Eurotiales TaxID=5042 RepID=A0A0B8N3X8_9EURO	No hit	0	0	1	No hit	SP(Sec/SPI)	0	0
AS_DN34413_c0_g1	KFX44183 cds supercontig:ASM75011v1:scf030:230845:233143:-1 gene:GQ26_0300920 gene_biotype:protein_coding transcript_biotype:protein_coding description:Fe-S cluster assembly protein dre2	0	86.9176	0	0	1.47387	Ascomycota	Fe-S cluster assembly protein DRE2	UniRef90_B8M072 Fe-S cluster assembly protein dre2 n=1 Tax=Talaromyces stipitatus (strain ATCC 10500 / CBS 375.48 / QM 6759/ NRRL 1006) TaxID=441959 RepID=DRE2_TALSN	No hit	0	0	1	No hit	0	0	0
AS_DN107497_c0_g1	KFX44293 cds supercontig:ASM75011v1:scf029:124556:129906:1 gene:GQ26_0290400 gene_biotype:protein_coding transcript_biotype:protein_coding description:hypothetical protein	6e-114	85.8209	0	0	1.46638	Ascomycota	NA	UniRef90_A0A2H3J7G0 Uncharacterized protein n=1 Tax=Penicillium occitanis TaxID=290292 RepID=A0A2H3J7G0_9EURO	No hit	0	0	1	No hit	0	0	0
AS_DN1334_c0_g1	KFX43120 cds supercontig:ASM75011v1:scf038:210847:212834:1 gene:GQ26_0380730 gene_biotype:protein_coding transcript_biotype:protein_coding description:Aldehyde dehydrogenase	0	90.1408	0	0	1.46426	Ascomycota	NA	UniRef90_B6QNM1 Aldehyde dehydrogenase, putative n=3 Tax=Eurotiales TaxID=5042 RepID=B6QNM1_TALMQ	No hit	0	0	1	No hit	0	0	0
AS_DN100065_c0_g1	OKL55985 cds supercontig:ASM190759v1:scaffold_15:578577:579536:-1 gene:UA08_08775 gene_biotype:protein_coding transcript_biotype:protein_coding description:hypothetical protein	1e-163	75.8583	0	0	1.45861	Ascomycota	Dehydrogenase with different specificitie	UniRef90_A0A2H3HXQ0 Short-chain dehydrogenase/reductase SDR n=1 Tax=Penicillium occitanis TaxID=290292 RepID=A0A2H3HXQ0_9EURO	No hit	0	0	1	No hit	0	0	0
AS_DN90207_c0_g1	KFX44707 cds supercontig:ASM75011v1:scf027:329887:336475:1 gene:GQ26_0271270 gene_biotype:protein_coding transcript_biotype:protein_coding description:Fatty acid synthase subunit beta	8e-99	77.0115	0	0	1.45286	Ascomycota	NA	UniRef90_A0A094FTA8 Uncharacterized protein n=1 Tax=Pseudogymnoascus sp. VKM F-4517 (FW-2822) TaxID=1420911 RepID=A0A094FTA8_9PEZI	No hit	0	0	1	No hit	0	0	0
AS_DN92680_c0_g1	KFX51446 cds supercontig:ASM75011v1:scf005:718250:723861:-1 gene:GQ26_0052370 gene_biotype:protein_coding transcript_biotype:protein_coding description:DNA mismatch repair protein PMS1	2e-143	89.1473	0	0	1.45167	Ascomycota	Membrane protein TMS1	UniRef90_B8MRN8 Membrane protein TMS1, putative n=3 Tax=Talaromyces TaxID=5094 RepID=B8MRN8_TALSN	No hit	0	0	1	No hit	SP(Sec/SPI)	0	0
AS_DN105316_c0_g1	GAM33473 cds supercontig:TcelY94_1.0:DF933800.1:478783:480664:-1 gene:TCE0_004r00389 gene_biotype:protein_coding transcript_biotype:protein_coding description:hypothetical protein	0	97.7925	0	0	1.44281	Ascomycota	NA	UniRef90_B6QIS4 Uncharacterized protein n=4 Tax=Eurotiales TaxID=5042 RepID=B6QIS4_TALMQ	No hit	0	0	1	No hit	0	0	0
AS_DN74192_c0_g1	EEA25715 cds supercontig:JCVI-PMFA1-2.0:scf_1105668340758:1674059:1677032:1 gene:PMAA_068110 gene_biotype:protein_coding transcript_biotype:protein_coding description:nitrate reductase NiaD	0	86.9239	0	0	1.44118	Ascomycota	NADH-cytochrome b5 reductase	UniRef90_B6QCR1 Nitrate reductase n=3 Tax=Eurotiales TaxID=5042 RepID=B6QCR1_TALMQ	No hit	0	0	1	No hit	0	0	0
AS_DN90163_c0_g1	EED15237 cds supercontig:JCVI-TSTA1-3.0:scf_1105507295515:1765290:1767037:1 gene:TSTA_046890 gene_biotype:protein_coding transcript_biotype:protein_coding description:60S ribosomal protein L11	5e-124	86.6667	0	0	1.44006	Ascomycota	Ribosomal protein L5	UniRef90_C4JUE2 60S ribosomal protein L11 n=2 Tax=Opisthokonta TaxID=33154 RepID=C4JUE2_UNCRE	No hit	0	0	1	No hit	0	0	0
AS_DN124610_c0_g1	GAM43474 cds supercontig:TcelY94_1.0:DF933846.1:300429:306941:1 gene:TCE0_050f18316 gene_biotype:protein_coding transcript_biotype:protein_coding description:DNA-directed RNA polymerase II complex subunit	4e-149	98.3333	0	0	1.42204	Ascomycota	NA	UniRef90_B8MU25 DNA-directed RNA polymerase subunit beta n=15 Tax=Eurotiales TaxID=5042 RepID=B8MU25_TALSN	No hit	0	0	1	No hit	0	0	0
AS_DN96099_c0_g1	EED19978 cds supercontig:JCVI-TSTA1-3.0:scf_1105507295541:2454429:2457308:-1 gene:TSTA_032340 gene_biotype:protein_coding transcript_biotype:protein_coding description:forkhead transcription factor Fkh1/2, putative	1e-89	85.3333	0	0	1.41667	Ascomycota	NA	UniRef90_A0A093VVT1 Fork head protein like 2 n=1 Tax=Talaromyces marneffei PM1 TaxID=1077442 RepID=A0A093VVT1_TALMA	No hit	0	0	1	No hit	0	0	0
AS_DN132713_c0_g1	EEA24076 cds supercontig:JCVI-PMFA1-2.0:scf_1105668340960:1151096:1152880:-1 gene:PMAA_080910 gene_biotype:protein_coding transcript_biotype:protein_coding description:alpha-1,2-mannosyltransferase(Ktr4), putative	0	90.8915	0	0	1.41106	Ascomycota	Glycolipid 2-alpha-mannosyltransferase 1	UniRef90_B8MAR0 Alpha-1,2-mannosyltransferase (Ktr4), putative n=1 Tax=Talaromyces stipitatus (strain ATCC 10500 / CBS 375.48/ QM 6759 / NRRL 1006) TaxID=441959 RepID=B8MAR0_TALSN	No hit	0	0	1	GT15(1-129)	0	0	0
AS_DN129987_c0_g1	KFX50737 cds supercontig:ASM75011v1:scf006:125529:129119:-1 gene:GQ26_0060470 gene_biotype:protein_coding transcript_biotype:protein_coding description:Beta-TrCP	7e-133	87.0647	0	0	1.40771	Ascomycota	NA	UniRef90_B6Q619 F-box and WD40 domain protein, putative n=3 Tax=Eurotiales TaxID=5042 RepID=B6Q619_TALMQ	No hit	0	0	1	No hit	0	0	0
AS_DN89280_c0_g1	KFX43614 cds supercontig:ASM75011v1:scf034:208145:212918:1 gene:GQ26_0340740 gene_biotype:protein_coding transcript_biotype:protein_coding description:Polyadenylate-binding protein,cytoplasmic and nuclear	2e-93	81.7391	0	0.094469	1.40398	Ascomycota	NA	UniRef90_A0A161YJV2 Uncharacterized protein n=1 Tax=Colletotrichum tofieldiae TaxID=708197 RepID=A0A161YJV2_9PEZI	No hit	0	0.102374	0.994746	No hit	0	0	0
AS_DN106611_c0_g1	KFX46744 cds supercontig:ASM75011v1:scf017:78670:79872:1 gene:GQ26_0170310 gene_biotype:protein_coding transcript_biotype:protein_coding description:Telomere maintenance protein SDE2	4e-115	86.7257	0	0	1.40041	Ascomycota	NA	UniRef90_B6QDL0 Uncharacterized protein n=3 Tax=Eurotiales TaxID=5042 RepID=B6QDL0_TALMQ	No hit	0	0	1	No hit	0	0	0
AS_DN27686_c0_g1	CRG91660 cds supercontig:PIS:WF-38-12_scaffold00010:557915:560056:1 gene:PISL3812_08710 gene_biotype:protein_coding transcript_biotype:protein_coding description:hypothetical protein	1e-146	85.1638	0	0	1.39891	Ascomycota	NA	UniRef90_R1ESD3 Putative fumarate reductase protein n=4 Tax=Botryosphaeriaceae TaxID=45131 RepID=R1ESD3_BOTPV	No hit	0	0	1	No hit	0	0	0
AS_DN94792_c0_g1	GAM42111 cds supercontig:TcelY94_1.0:DF933839.1:546567:551216:1 gene:TCE0_043f15784 gene_biotype:protein_coding transcript_biotype:protein_coding description:hypothetical protein	1e-165	94.8925	0	0	1.39395	Ascomycota	NA	UniRef90_A0A2H3IHZ0 GRIP n=1 Tax=Penicillium occitanis TaxID=290292 RepID=A0A2H3IHZ0_9EURO	No hit	0	0	1	No hit	0	0	0
AS_DN121828_c0_g1	GAM43519 cds supercontig:TcelY94_1.0:DF933846.1:451903:452627:1 gene:TCE0_050f18397 gene_biotype:protein_coding transcript_biotype:protein_coding description:adenine phosphoribosyltransferase	0	95.7494	0	0	1.39026	Ascomycota	Adenine phosphoribosyl transferase	UniRef90_B6QV11 Adenine phosphoribosyltransferase 1 n=6 Tax=Eurotiales TaxID=5042 RepID=B6QV11_TALMQ	No hit	0	0	1	No hit	0	0	0
AS_DN73571_c0_g1	KFX50742 cds supercontig:ASM75011v1:scf006:139234:143586:-1 gene:GQ26_0060520 gene_biotype:protein_coding transcript_biotype:protein_coding description:pH-response transcription factor	0	85.5107	0	0	1.38161	Ascomycota	Ph-response transcription factor pacc rim101	UniRef90_A0A2H3IMR2 Zinc finger, C2H2 n=1 Tax=Penicillium occitanis TaxID=290292 RepID=A0A2H3IMR2_9EURO	No hit	0	0	1	No hit	0	0	0
AS_DN1416_c0_g1	KFX41835 cds supercontig:ASM75011v1:scf053:88001:90443:1 gene:GQ26_0530320 gene_biotype:protein_coding transcript_biotype:protein_coding description:SH3 domain-containing YSC84-like protein 1	0	88.5122	0	0	1.37668	Ascomycota	NA	UniRef90_A0A2H3II47 Uncharacterized protein n=1 Tax=Penicillium occitanis TaxID=290292 RepID=A0A2H3II47_9EURO	No hit	0	0	1	No hit	0	0	0
AS_DN60206_c0_g1	EEA25714 cds supercontig:JCVI-PMFA1-2.0:scf_1105668340758:1669265:1672924:-1 gene:PMAA_068100 gene_biotype:protein_coding transcript_biotype:protein_coding description:nitrite reductase NiiA	2e-142	93.0435	0	0	1.37263	Ascomycota	NA	UniRef90_B8M2D3 Nitrite reductase NiiA n=3 Tax=Eurotiales TaxID=5042 RepID=B8M2D3_TALSN	No hit	0	0	1	No hit	0	0	0
AS_DN108355_c0_g1	KFX47483 cds supercontig:ASM75011v1:scf015:580671:582733:-1 gene:GQ26_0151920 gene_biotype:protein_coding transcript_biotype:protein_coding description:Heat shock protein sti1 like	3e-147	90.404	0	0	1.36074	Ascomycota	NA	UniRef90_B8M1B1 Heat shock protein (Sti1), putative n=3 Tax=Talaromyces TaxID=5094 RepID=B8M1B1_TALSN	No hit	0	0	1	No hit	0	0	0
AS_DN61561_c0_g1	KFX50160 cds supercontig:ASM75011v1:scf008:801900:804319:-1 gene:GQ26_0083040 gene_biotype:protein_coding transcript_biotype:protein_coding description:Alkali-sensitive linkage protein 1	6e-119	77.3893	0	0.0458507	1.34525	Ascomycota	NA	UniRef90_A0A2H3IEC6 Glycoside hydrolase, superfamily n=1 Tax=Penicillium occitanis TaxID=290292 RepID=A0A2H3IEC6_9EURO	No hit	0	0.0525213	0.99862	GH128(4-121)	0	0	0
AS_DN100875_c0_g1	EEA20172 cds supercontig:JCVI-PMFA1-2.0:scf_1105668340738:402328:404827:-1 gene:PMAA_040310 gene_biotype:protein_coding transcript_biotype:protein_coding description:RING and UBP finger domain protein, putative	0	88.6926	0	0	1.34369	Ascomycota	NA	UniRef90_B6QPW6 RING and UBP finger domain protein, putative n=3 Tax=Eurotiales TaxID=5042 RepID=B6QPW6_TALMQ	No hit	0	0	1	No hit	0	0	0
AS_DN85291_c0_g1	KFX46715 cds supercontig:ASM75011v1:scf017:29654:31395:1 gene:GQ26_0170130 gene_biotype:protein_coding transcript_biotype:protein_coding description:hypothetical protein	7e-98	86.0399	0	0	1.34355	Ascomycota	NA	UniRef90_A0A2H3ISF0 NYN domain, limkain-b1-type n=1 Tax=Penicillium occitanis TaxID=290292 RepID=A0A2H3ISF0_9EURO	No hit	0	0	1	No hit	0	0	0
AS_DN60175_c0_g1	KFX42927 cds supercontig:ASM75011v1:scf039:31657:34367:-1 gene:GQ26_0390090 gene_biotype:protein_coding transcript_biotype:protein_coding description:Carboxylic acid transporter protein like	7e-93	80.236	0	0	1.34275	Ascomycota	NA	UniRef90_A0A093URK3 Carboxylic acid transporter protein like n=3 Tax=Eurotiales TaxID=5042 RepID=A0A093URK3_TALMA	No hit	0	0	1	No hit	0	0	0
AS_DN66026_c0_g1	KFX42705 cds supercontig:ASM75011v1:scf041:39058:40288:-1 gene:GQ26_0410170 gene_biotype:protein_coding transcript_biotype:protein_coding description:ATP synthase subunit delta, mitochondrial	0	93.7751	0	0	1.31603	Ascomycota	ATP synthase delta chain mitochondrial	UniRef90_B8MHE9 ATP synthase delta chain, mitochondrial, putative n=6 Tax=Eurotiales TaxID=5042 RepID=B8MHE9_TALSN	No hit	0	0	1	No hit	0	0	0
AS_DN68076_c0_g1	KFX47767 cds supercontig:ASM75011v1:scf014:453991:457850:-1 gene:GQ26_0141650 gene_biotype:protein_coding transcript_biotype:protein_coding description:Cross-pathway control protein A	7e-134	84.7737	0	0	1.31365	Ascomycota	Cross-pathway control protein A	UniRef90_A0A2H3I9P9 Uncharacterized protein n=1 Tax=Penicillium occitanis TaxID=290292 RepID=A0A2H3I9P9_9EURO	No hit	0	0	1	No hit	0	0	0
AS_DN123859_c0_g1	KFX48050 cds supercontig:ASM75011v1:scf013:330657:331846:1 gene:GQ26_0131260 gene_biotype:protein_coding transcript_biotype:protein_coding description:Coupling of ubiquitin conjugation to ER degradation protein 1	2e-123	92.4837	0	0	1.3132	Ascomycota	NA	UniRef90_A0A093V7A7 Coupling of ubiquitin conjugation to ER degradation protein 1 n=2 Tax=Talaromyces marneffei TaxID=37727 RepID=A0A093V7A7_TALMA	No hit	0	0	1	No hit	0	0	0
AS_DN92754_c0_g1	KFX44924 cds supercontig:ASM75011v1:scf025:89473:93030:1 gene:GQ26_0250340 gene_biotype:protein_coding transcript_biotype:protein_coding description:Transcriptional activator protein acu-15	3e-112	83.3333	0	0	1.30038	Ascomycota	NA	UniRef90_B6QCH0 C6 transcription factor FacB/Cat8 n=3 Tax=Eurotiales TaxID=5042 RepID=B6QCH0_TALMQ	No hit	0	0	1	No hit	0	0	0
AS_DN103178_c0_g1	KFX50604 cds supercontig:ASM75011v1:scf007:764565:769536:1 gene:GQ26_0072770 gene_biotype:protein_coding transcript_biotype:protein_coding description:putative sugar phosphate/phosphate translocator	5e-175	85.1153	0	0	1.29945	Ascomycota	NA	No hits	No hit	0	0	1	No hit	0	0	0
AS_DN76365_c0_g1	KFX43815 cds supercontig:ASM75011v1:scf032:103231:104360:-1 gene:GQ26_0320380 gene_biotype:protein_coding transcript_biotype:protein_coding description:L-xylulose reductase	0	93.4174	0	0	1.29289	Ascomycota	Reductase with broad range of substrate specificity	UniRef90_B8MD61 Carbonyl reductase, putative n=5 Tax=Eurotiales TaxID=5042 RepID=B8MD61_TALSN	No hit	0	0	1	No hit	0	0	0
AS_DN92610_c0_g1	OKL63142 cds supercontig:ASM190759v1:scaffold_1:772140:776205:1 gene:UA08_01357 gene_biotype:protein_coding transcript_biotype:protein_coding description:hypothetical protein	1e-107	79.8148	0	0	1.27858	Ascomycota	Catalase	UniRef90_B8M4R0 Catalase n=4 Tax=Eurotiales TaxID=5042 RepID=B8M4R0_TALSN	No hit	0	0	1	No hit	0	0	0
AS_DN69932_c0_g1	OKL63568 cds supercontig:ASM190759v1:scaffold_1:1753112:1753717:-1 gene:UA08_01692 gene_biotype:protein_coding transcript_biotype:protein_coding description:hypothetical protein	6e-130	80.2198	0	0	1.27792	Ascomycota	Mismatched base pair and cruciform DNA recognition	UniRef90_A0A1Q5QCG9 Uncharacterized protein n=1 Tax=Talaromyces atroroseus TaxID=1441469 RepID=A0A1Q5QCG9_9EURO	No hit	0	0	1	No hit	0	0	0
AS_DN124865_c0_g1	EED18040 cds supercontig:JCVI-TSTA1-3.0:scf_1105507295555:1902625:1904540:1 gene:TSTA_118120 gene_biotype:protein_coding transcript_biotype:protein_coding description:glutathione-dependent formaldehyde dehydrogenase	5e-89	83.1933	0	0	1.26955	Ascomycota	NA	UniRef90_A0A2H3I259 Polyketide synthase, enoylreductase n=1 Tax=Penicillium occitanis TaxID=290292 RepID=A0A2H3I259_9EURO	No hit	0	0	1	No hit	0	0	0
AS_DN130089_c0_g1	KFX47844 cds supercontig:ASM75011v1:scf014:627679:630851:-1 gene:GQ26_0142280 gene_biotype:protein_coding transcript_biotype:protein_coding description:Translation initiation factor RLI1	0	94.6341	0	0	1.26913	Ascomycota	NA	UniRef90_A0A093V6N1 Translation initiation factor RLI1 n=1 Tax=Talaromyces marneffei PM1 TaxID=1077442 RepID=A0A093V6N1_TALMA	No hit	0	0	1	No hit	0	gnl|TC-DB|KZV12328|3.A.1.31.3 RLI1 [Saccharomyces cerevisiae]	88.7805
AS_DN122735_c0_g1	EEA27119 cds supercontig:JCVI-PMFA1-2.0:scf_1105668340764:1295273:1297209:-1 gene:PMAA_020120 gene_biotype:protein_coding transcript_biotype:protein_coding description:conserved hypothetical protein	1e-160	93.4426	0	0	1.25671	Ascomycota	NA	UniRef90_A0A2H3J0Z0 Uncharacterized protein n=1 Tax=Penicillium occitanis TaxID=290292 RepID=A0A2H3J0Z0_9EURO	No hit	0	0	1	No hit	0	0	0
AS_DN117140_c0_g1	KFX53565 cds supercontig:ASM75011v1:scf001:962893:965143:1 gene:GQ26_0013360 gene_biotype:protein_coding transcript_biotype:protein_coding description:Mannan polymerase II complex ANP1 subunit	8e-153	88.5845	0	0	1.25135	Ascomycota	NA	UniRef90_A0A2H3ILT7 Anp1 n=1 Tax=Penicillium occitanis TaxID=290292 RepID=A0A2H3ILT7_9EURO	No hit	0	0	1	GT62(1-97)	0	0	0
AS_DN61665_c0_g1	KFX47346 cds supercontig:ASM75011v1:scf015:228696:230954:-1 gene:GQ26_0150770 gene_biotype:protein_coding transcript_biotype:protein_coding description:putative eukaryotic translation initiation factor 5	6e-159	88.1579	0	0	1.24457	Ascomycota	NA	UniRef90_B8M2M5 Eukaryotic translation initiation factor 5, putative n=4 Tax=Eurotiales TaxID=5042 RepID=B8M2M5_TALSN	No hit	0	0	1	No hit	0	0	0
AS_DN81724_c0_g1	EED15391 cds supercontig:JCVI-TSTA1-3.0:scf_1105507295515:2144610:2147150:-1 gene:TSTA_048330 gene_biotype:protein_coding transcript_biotype:protein_coding description:ATP dependent RNA helicase (Sub2), putative	4e-160	89.7059	0	0	1.24237	Ascomycota	NA	UniRef90_A0A093V3Q2 ATP-dependent RNA helicase sub2 n=3 Tax=Talaromyces marneffei TaxID=37727 RepID=A0A093V3Q2_TALMA	No hit	0	0	1	No hit	0	gnl|TC-DB|Q07478|3.A.22.1.1 ATP-dependent RNA helicase SUB2 OS=Saccharomyces cerevisiae (strain ATCC 204508 / S288c) GN=SUB2 PE=1 SV=1	86.7647
AS_DN110211_c0_g1	KFX48196 cds supercontig:ASM75011v1:scf013:659987:662277:1 gene:GQ26_0132440 gene_biotype:protein_coding transcript_biotype:protein_coding description:Inosine-5'-monophosphate dehydrogenase	0	93.0233	0	0	1.23016	Ascomycota	NA	UniRef90_A0A0U1LXL6 Inosine-5'-monophosphate dehydrogenase n=1 Tax=Talaromyces islandicus TaxID=28573 RepID=A0A0U1LXL6_TALIS	No hit	0	0	1	No hit	0	0	0
AS_DN27782_c0_g1	KFX50501 cds supercontig:ASM75011v1:scf007:563071:565508:-1 gene:GQ26_0072050 gene_biotype:protein_coding transcript_biotype:protein_coding description:Arginine--tRNA ligase, cytoplasmic	0	93.0791	0	0	1.22983	Ascomycota	NA	UniRef90_A0A093VV70 Arginine--tRNA ligase, cytoplasmic n=3 Tax=Eurotiales TaxID=5042 RepID=A0A093VV70_TALMA	No hit	0	0	1	No hit	0	0	0
AS_DN10936_c0_g1	KFX49427 cds supercontig:ASM75011v1:scf009:268296:271014:1 gene:GQ26_0090840 gene_biotype:protein_coding transcript_biotype:protein_coding description:putative 26S proteasome regulatory subunit rpn3	0	91.4683	0	0	1.22029	Ascomycota	NA	UniRef90_A0A093VA55 Putative 26S proteasome regulatory subunit rpn3 n=1 Tax=Talaromyces marneffei PM1 TaxID=1077442 RepID=A0A093VA55_TALMA	No hit	0	0	1	No hit	0	0	0
AS_DN102111_c0_g1	KFX48390 cds supercontig:ASM75011v1:scf012:307766:310258:-1 gene:GQ26_0121080 gene_biotype:protein_coding transcript_biotype:protein_coding description:Kexin	3e-112	75.8621	0	0	1.21631	Ascomycota	NA	UniRef90_A0A2H3IDK3 Proprotein convertase, P n=1 Tax=Penicillium occitanis TaxID=290292 RepID=A0A2H3IDK3_9EURO	No hit	0	0	1	No hit	0	0	0
AS_DN8007_c0_g1	KFX47525 cds supercontig:ASM75011v1:scf015:695593:698345:1 gene:GQ26_0152300 gene_biotype:protein_coding transcript_biotype:protein_coding description:Fimbrin	1e-175	91.3333	0	0	1.2114	Ascomycota	NA	UniRef90_B8M0Y6 Actin-bundling protein Sac6, putative n=6 Tax=Eurotiales TaxID=5042 RepID=B8M0Y6_TALSN	No hit	0	0	1	No hit	0	0	0
AS_DN89450_c0_g1	KFX44097 cds supercontig:ASM75011v1:scf030:63508:65620:-1 gene:GQ26_0300260 gene_biotype:protein_coding transcript_biotype:protein_coding description:Nuclear polyadenylated RNA-binding protein NAB2	0	86.7792	0	0	1.20767	Ascomycota	NA	UniRef90_A0A093V1F3 Nuclear polyadenylated RNA-binding protein NAB2 n=4 Tax=Eurotiales TaxID=5042 RepID=A0A093V1F3_TALMA	No hit	0	0	1	No hit	0	0	0
AS_DN114581_c0_g1	KFX43801 cds supercontig:ASM75011v1:scf032:64566:66210:1 gene:GQ26_0320250 gene_biotype:protein_coding transcript_biotype:protein_coding description:SEC14 cytosolic factor	3e-148	70.6093	0	0	1.20173	Ascomycota	NA	UniRef90_A0A2H3IR34 Uncharacterized protein n=1 Tax=Penicillium occitanis TaxID=290292 RepID=A0A2H3IR34_9EURO	No hit	0	0	1	No hit	0	0	0
AS_DN91789_c0_g1	KFX47689 cds supercontig:ASM75011v1:scf014:300422:306935:1 gene:GQ26_0141060 gene_biotype:protein_coding transcript_biotype:protein_coding description:Virulence protein SSD1	5e-174	94.6565	0	0	1.2017	Ascomycota	NA	UniRef90_B8LVP7 Cell wall biogenesis protein phosphatase Ssd1, putative n=5 Tax=Eurotiales TaxID=5042 RepID=B8LVP7_TALSN	No hit	0	0	1	No hit	0	0	0
AS_DN127730_c0_g1	KFX45811 cds supercontig:ASM75011v1:scf021:68392:71884:1 gene:GQ26_0210260 gene_biotype:protein_coding transcript_biotype:protein_coding description:Nitrogen assimilation transcription factor nit-4	3e-127	81.8792	0.0317706	0	1.19785	Ascomycota	NA	UniRef90_A0A2H3IAA2 Transcription factor n=1 Tax=Penicillium occitanis TaxID=290292 RepID=A0A2H3IAA2_9EURO	No hit	0.0396856	0	0.999212	No hit	0	0	0
AS_DN121406_c0_g1	KFX53454 cds supercontig:ASM75011v1:scf001:750594:752667:-1 gene:GQ26_0012620 gene_biotype:protein_coding transcript_biotype:protein_coding description:putative vacuolar protein sorting-associated protein TDA6	2e-174	88.3041	0	0	1.1912	Ascomycota	NA	UniRef90_A0A2H3IS13 Vacuolar protein sorting-associated protein 62 n=1 Tax=Penicillium occitanis TaxID=290292 RepID=A0A2H3IS13_9EURO	No hit	0	0	1	CBM18(25)	0	0	0
AS_DN97262_c0_g1	EEA26043 cds supercontig:JCVI-PMFA1-2.0:scf_1105668340758:2640370:2642478:1 gene:PMAA_071280 gene_biotype:protein_coding transcript_biotype:protein_coding description:eukaryotic translation initiation factor 5, putative	0	90.8184	0	0	1.17894	Ascomycota	NA	UniRef90_A0A225B2Y5 Uncharacterized protein n=1 Tax=Talaromyces atroroseus TaxID=1441469 RepID=A0A225B2Y5_9EURO	No hit	0	0	1	No hit	0	0	0
AS_DN134339_c0_g1	KFX48105 cds supercontig:ASM75011v1:scf013:469205:472675:-1 gene:GQ26_0131750 gene_biotype:protein_coding transcript_biotype:protein_coding description:putative RING finger protein P4H10.07	0	90.6926	0	0	1.17839	Ascomycota	NA	UniRef90_B6QP26 RING finger protein n=3 Tax=Eurotiales TaxID=5042 RepID=B6QP26_TALMQ	No hit	0	0	1	No hit	0	0	0
AS_DN65952_c0_g1	KFX52256 cds supercontig:ASM75011v1:scf003:481898:487825:-1 gene:GQ26_0031730 gene_biotype:protein_coding transcript_biotype:protein_coding description:Potassium-transporting ATPase alpha chain 2	5e-104	87.4214	0	0	1.17377	Ascomycota	NA	UniRef90_A0A093Y428 Potassium-transporting ATPase alpha chain 2 n=2 Tax=Talaromyces marneffei PM1 TaxID=1077442 RepID=A0A093Y428_TALMA	No hit	0	0	1	No hit	0	gnl|TC-DB|Q2U3D2|3.A.3.1.7 Na+/K+ ATPase OS=Aspergillus oryzae GN=AO090038000088 PE=3 SV=1	79.2453
AS_DN107049_c0_g1	EEA27889 cds supercontig:JCVI-PMFA1-2.0:scf_1105668340764:3226279:3227534:-1 gene:PMAA_027290 gene_biotype:protein_coding transcript_biotype:protein_coding description:conserved hypothetical protein	1e-110	79.5866	0	0	1.16249	Ascomycota	NA	UniRef90_A0A2H3IBA4 DNA-binding SAP n=1 Tax=Penicillium occitanis TaxID=290292 RepID=A0A2H3IBA4_9EURO	No hit	0	0	1	No hit	0	0	0
AS_DN97499_c0_g1	KFX48452 cds supercontig:ASM75011v1:scf012:458568:461359:1 gene:GQ26_0121640 gene_biotype:protein_coding transcript_biotype:protein_coding description:Sphingosine-1-phosphate lyase	1e-130	88.2051	0	0	1.15737	Ascomycota	Sphinganine-1-phosphate aldolase	UniRef90_A0A2H3I8E1 Pyridoxal phosphate-dependent transferase, major region, subdomain 2 n=4 Tax=Eurotiales TaxID=5042 RepID=A0A2H3I8E1_9EURO	No hit	0	0	1	No hit	0	0	0
AS_DN80050_c0_g1	KFX46416 cds supercontig:ASM75011v1:scf019:374679:378672:1 gene:GQ26_0191470 gene_biotype:protein_coding transcript_biotype:protein_coding description:Pre-mRNA-splicing factor ATP-dependent RNA helicase prp22	1e-156	88.0795	0	0	1.14818	Ascomycota	NA	UniRef90_B6QAH2 RNA helicase-like splicing factor (HRH1), putative n=2 Tax=Talaromyces marneffei TaxID=37727 RepID=B6QAH2_TALMQ	No hit	0	0	1	No hit	0	0	0
AS_DN112971_c0_g1	KFX49422 cds supercontig:ASM75011v1:scf009:257123:259795:1 gene:GQ26_0090800 gene_biotype:protein_coding transcript_biotype:protein_coding description:Eukaryotic translation initiation factor 2A	1e-170	91.7258	0	0	1.14724	Ascomycota	NA	UniRef90_B8MNG7 Eukaryotic translation initiation factor 2A n=2 Tax=Eurotiales TaxID=5042 RepID=B8MNG7_TALSN	No hit	0	0	1	No hit	0	0	0
AS_DN132887_c0_g1	EED13151 cds supercontig:JCVI-TSTA1-3.0:scf_1105507295487:1211883:1214337:1 gene:TSTA_056520 gene_biotype:protein_coding transcript_biotype:protein_coding description:ATP citrate lyase,subunit 1, putative	2e-142	95.5556	0	0	1.14394	Ascomycota	NA	UniRef90_A0A093Y218 ATP-citrate synthase subunit 1 n=3 Tax=Talaromyces marneffei PM1 TaxID=1077442 RepID=A0A093Y218_TALMA	No hit	0	0	1	No hit	0	0	0
AS_DN79967_c0_g1	GAM33446 cds supercontig:TcelY94_1.0:DF933800.1:395533:397708:1 gene:TCE0_004f00343 gene_biotype:protein_coding transcript_biotype:protein_coding description:cytochrome c oxidase subunit	0	96.5368	0	0	1.14232	Ascomycota	Cytochrome c oxidase polypeptide V	UniRef90_A0A0B8N3J8 Cytochrome c oxidase subunit n=2 Tax=Eurotiales TaxID=5042 RepID=A0A0B8N3J8_9EURO	No hit	0	0	1	No hit	0	0	0
AS_DN9263_c0_g1	KFX53237 cds supercontig:ASM75011v1:scf001:267933:270428:-1 gene:GQ26_0010960 gene_biotype:protein_coding transcript_biotype:protein_coding description:78 kDa glucose-regulated protein like	1e-135	87.7333	0	0	1.12989	Ascomycota	NA	UniRef90_A0A0F0IAA1 Hsp70 protein n=1 Tax=Aspergillus parasiticus (strain ATCC 56775 / NRRL 5862 / SRRC 143 / SU-1) TaxID=1403190 RepID=A0A0F0IAA1_ASPPU	Hsp70	0	0	1	No hit	0	gnl|TC-DB|P11021|1.A.33.1.5 78 kDa glucose-regulated protein OS=Homo sapiens GN=HSPA5 PE=1 SV=2	79.2
AS_DN98738_c0_g1	EEA24524 cds supercontig:JCVI-PMFA1-2.0:scf_1105668340960:2357734:2360406:1 gene:PMAA_085210 gene_biotype:protein_coding transcript_biotype:protein_coding description:BAR adaptor protein RVS161, putative	2e-132	91.3043	0	0	1.12603	Ascomycota	BAR adaptor protein Hob3	UniRef90_A0A0F4YLP3 BAR adaptor protein RVS161 n=1 Tax=Rasamsonia emersonii CBS 393.64 TaxID=1408163 RepID=A0A0F4YLP3_TALEM	No hit	0	0	1	No hit	0	gnl|TC-DB|P25343|8.A.34.2.1 Reduced viability upon starvation protein 161 - Saccharomyces cerevisiae (Baker's yeast).	79.1304
AS_DN131065_c0_g1	KFX49317 cds supercontig:ASM75011v1:scf010:815144:817123:1 gene:GQ26_0102920 gene_biotype:protein_coding transcript_biotype:protein_coding description:26S protease regulatory subunit 6A	0	91.828	0	0	1.12354	Ascomycota	NA	UniRef90_B8M6P8 Proteasome regulatory particle subunit Rpt5, putative n=6 Tax=Eurotiales TaxID=5042 RepID=B8M6P8_TALSN	Hsp100	0	0	1	No hit	0	0	0
AS_DN92627_c0_g1	OKL64404 cds supercontig:ASM190759v1:scaffold_0:3262227:3266886:1 gene:UA08_01129 gene_biotype:protein_coding transcript_biotype:protein_coding description:Heat shock protein hsp98	1e-180	89.8374	0	0	1.12223	Ascomycota	NA	UniRef90_A0A225B120 Heat shock protein hsp98 n=1 Tax=Talaromyces atroroseus TaxID=1441469 RepID=A0A225B120_9EURO	Hsp100	0	0	1	No hit	0	gnl|TC-DB|Q9FI56|3.A.9.1.2 Chaperone protein ClpC1, chloroplastic OS=Arabidopsis thaliana GN=CLPC1 PE=1 SV=1	76.8293
AS_DN114221_c0_g1	KFX41793 cds supercontig:ASM75011v1:scf053:45:4515:1 gene:GQ26_0530010 gene_biotype:protein_coding transcript_biotype:protein_coding description:Serine/threonine-protein kinase ksp1	2e-137	91.7379	0	0	1.12005	Ascomycota	NA	UniRef90_A0A225B3J1 Uncharacterized protein n=1 Tax=Talaromyces atroroseus TaxID=1441469 RepID=A0A225B3J1_9EURO	No hit	0	0	1	No hit	0	0	0
AS_DN81352_c0_g1	KFX49965 cds supercontig:ASM75011v1:scf008:423172:425496:-1 gene:GQ26_0081610 gene_biotype:protein_coding transcript_biotype:protein_coding description:Zinc finger transcription factor ace1	1e-119	94.7368	0	0	1.11943	Ascomycota	NA	UniRef90_A0A0D6A8D5 AceA like protein n=2 Tax=Eurotiales TaxID=5042 RepID=A0A0D6A8D5_9EURO	No hit	0	0	1	No hit	0	0	0
AS_DN66021_c0_g1	KFX41834 cds supercontig:ASM75011v1:scf053:85935:87727:1 gene:GQ26_0530310 gene_biotype:protein_coding transcript_biotype:protein_coding description:Electron transfer flavoprotein subunit beta	3e-167	88.1988	0	0	1.11879	Ascomycota	Electron transfer flavoprotein subunit beta	UniRef90_B8MBT4 Electron transfer flavoprotein, beta subunit, putative n=5 Tax=Talaromyces TaxID=5094 RepID=B8MBT4_TALSN	No hit	0	0	1	No hit	0	0	0
AS_DN123151_c0_g1	KFX51310 cds supercontig:ASM75011v1:scf005:399649:404497:1 gene:GQ26_0051410 gene_biotype:protein_coding transcript_biotype:protein_coding description:putative transcription factor TDA9	5e-139	90.9836	0	0	1.09048	Ascomycota	DNA binding regulatory protein AmdX	UniRef90_A0A093VXG5 Putative transcription factor TDA9 n=1 Tax=Talaromyces marneffei PM1 TaxID=1077442 RepID=A0A093VXG5_TALMA	No hit	0	0	1	No hit	0	0	0
AS_DN75107_c0_g1	GAM33318 cds supercontig:TcelY94_1.0:DF933799.1:244225:245518:-1 gene:TCE0_003r00131 gene_biotype:protein_coding transcript_biotype:protein_coding description:hypothetical protein	0	98.5729	0	0	1.07319	Ascomycota	Peptide hydrolase	UniRef90_A0A0B8MXP9 Peptide hydrolase n=2 Tax=Eurotiales TaxID=5042 RepID=A0A0B8MXP9_9EURO	No hit	0	0	1	No hit	0	0	0
AS_DN100847_c0_g1	OKL63142 cds supercontig:ASM190759v1:scaffold_1:772140:776205:1 gene:UA08_01357 gene_biotype:protein_coding transcript_biotype:protein_coding description:hypothetical protein	4e-105	82.2581	0	0	1.05666	Ascomycota	NA	UniRef90_B8M4R0 Catalase n=4 Tax=Eurotiales TaxID=5042 RepID=B8M4R0_TALSN	No hit	0	0	1	No hit	0	0	0
AS_DN123098_c0_g1	KFX50352 cds supercontig:ASM75011v1:scf007:278717:281443:-1 gene:GQ26_0070990 gene_biotype:protein_coding transcript_biotype:protein_coding description:Malate synthase, glyoxysomal	0	89.5464	0	0	1.05097	Ascomycota	Malate synthase (Fragment)	UniRef90_B8M532 Malate synthase n=6 Tax=Eurotiales TaxID=5042 RepID=B8M532_TALSN	No hit	0	0	1	No hit	0	0	0
AS_DN79151_c0_g1	KFX48461 cds supercontig:ASM75011v1:scf012:474267:477497:-1 gene:GQ26_0121730 gene_biotype:protein_coding transcript_biotype:protein_coding description:Bromodomain-containing factor 1	5e-134	89.418	0	0	1.04019	Ascomycota	NA	UniRef90_B6QQ47 Transcription regulator BDF1, putative n=3 Tax=Eurotiales TaxID=5042 RepID=B6QQ47_TALMQ	No hit	0	0	1	No hit	0	0	0
AS_DN97205_c0_g1	EEA22718 cds supercontig:JCVI-PMFA1-2.0:scf_1105668340752:837437:838837:-1 gene:PMAA_093350 gene_biotype:protein_coding transcript_biotype:protein_coding description:dienelactone hydrolase family protein	1e-176	87.0476	0	0	1.03234	Ascomycota	Carboxymethylenebutenolidase	UniRef90_B8MKJ2 Dienelactone hydrolase family protein n=2 Tax=Eurotiales TaxID=5042 RepID=B8MKJ2_TALSN	No hit	0	0	1	No hit	0	0	0
AS_DN76105_c0_g1	KFX52266 cds supercontig:ASM75011v1:scf003:511818:514988:-1 gene:GQ26_0031820 gene_biotype:protein_coding transcript_biotype:protein_coding description:Alpha,alpha-trehalose-phosphate synthase [UDP-forming] 2	4e-115	89.8413	0	0	1.02737	Ascomycota	NA	UniRef90_B8MGW4 Trehalose-6-phosphate synthase n=5 Tax=Eurotiales TaxID=5042 RepID=B8MGW4_TALSN	No hit	0	0	1	GT20(2)	0	0	0
AS_DN133252_c0_g1	KFX48346 cds supercontig:ASM75011v1:scf012:189611:203335:1 gene:GQ26_0120700 gene_biotype:protein_coding transcript_biotype:protein_coding description:Uncharacterized protein C22E12.19	8e-108	84.9624	0	0	1.02239	Ascomycota	NA	UniRef90_A0A2H3IIH3 Zinc finger, RING-type n=1 Tax=Penicillium occitanis TaxID=290292 RepID=A0A2H3IIH3_9EURO	No hit	0	0	1	No hit	0	0	0
AS_DN130820_c0_g1	KFX52627 cds supercontig:ASM75011v1:scf002:195416:196501:-1 gene:GQ26_0020670 gene_biotype:protein_coding transcript_biotype:protein_coding description:Ubiquitin-conjugating enzyme E2 15	1e-175	92.619	0	0	1.0121	Ascomycota	Ubiquitin conjugating enzyme	UniRef90_A0A1Q5QAS0 Ubiquitin-conjugating enzyme E2 15 n=1 Tax=Talaromyces atroroseus TaxID=1441469 RepID=A0A1Q5QAS0_9EURO	No hit	0	0	1	No hit	0	0	0
AS_DN126941_c0_g1	KFX44777 cds supercontig:ASM75011v1:scf026:144219:148210:-1 gene:GQ26_0260490 gene_biotype:protein_coding transcript_biotype:protein_coding description:Nuclear localization sequence-binding protein	0	83.2011	0	0	0.999158	Ascomycota	NA	UniRef90_A0A2H3IKV7 Nucleotide-binding, alpha-beta plait n=1 Tax=Penicillium occitanis TaxID=290292 RepID=A0A2H3IKV7_9EURO	No hit	0	0	1	No hit	0	0	0
AS_DN131019_c0_g1	GAM42155 cds supercontig:TcelY94_1.0:DF933839.1:700086:701520:1 gene:TCE0_043f15862 gene_biotype:protein_coding transcript_biotype:protein_coding description:zuotin	0	96.9512	0	0	0.984446	Ascomycota	NA	UniRef90_A0A093UWJ0 Zuotin n=5 Tax=Eurotiales TaxID=5042 RepID=A0A093UWJ0_TALMA	No hit	0	0	1	No hit	0	0	0
AS_DN100498_c0_g1	EED23651 cds supercontig:JCVI-TSTA1-3.0:scf_1105507295523:3068496:3069702:-1 gene:TSTA_070610 gene_biotype:protein_coding transcript_biotype:protein_coding description:conserved hypothetical protein	2e-123	81.9549	0	0	0.981298	Ascomycota	NA	UniRef90_B6Q2N3 Uncharacterized protein n=3 Tax=Eurotiales TaxID=5042 RepID=B6Q2N3_TALMQ	No hit	0	0	1	No hit	0	0	0
AS_DN104960_c0_g1	KFX44212 cds supercontig:ASM75011v1:scf030:280898:286575:1 gene:GQ26_0301130 gene_biotype:protein_coding transcript_biotype:protein_coding description:General negative regulator of transcription subunit 4	1e-160	91.8519	0	0	0.956913	Ascomycota	NA	UniRef90_B6QB06 CCR4-NOT core complex subunit Not4, putative n=3 Tax=Eurotiales TaxID=5042 RepID=B6QB06_TALMQ	No hit	0	0	1	No hit	0	0	0
AS_DN114835_c0_g1	KFX50706 cds supercontig:ASM75011v1:scf006:51594:53210:1 gene:GQ26_0060180 gene_biotype:protein_coding transcript_biotype:protein_coding description:Suppressor protein STM1	0	91.1809	0	0	0.955724	Ascomycota	Telomere and ribosome associated protein Stm1	UniRef90_A0A2H3IXZ3 Uncharacterized protein n=1 Tax=Penicillium occitanis TaxID=290292 RepID=A0A2H3IXZ3_9EURO	No hit	0	0	1	No hit	0	0	0
AS_DN134943_c0_g1	KFX50661 cds supercontig:ASM75011v1:scf007:890429:894181:-1 gene:GQ26_0073210 gene_biotype:protein_coding transcript_biotype:protein_coding description:Grainyhead-like protein 2 like	4e-119	92.0792	0	0	0.950255	Ascomycota	NA	UniRef90_A0A093XZI3 Grainyhead-like protein 2 like n=1 Tax=Talaromyces marneffei PM1 TaxID=1077442 RepID=A0A093XZI3_TALMA	No hit	0	0	1	No hit	0	0	0
AS_DN93690_c0_g1	OKL61448 cds supercontig:ASM190759v1:scaffold_3:654686:656634:-1 gene:UA08_03275 gene_biotype:protein_coding transcript_biotype:protein_coding description:hypothetical protein	7e-57	72.0307	0	0	0.948699	Ascomycota	NA	UniRef90_A0A225AVX1 Uncharacterized protein n=1 Tax=Talaromyces atroroseus TaxID=1441469 RepID=A0A225AVX1_9EURO	No hit	0	0	1	No hit	0	0	0
AS_DN128464_c0_g1	GAM43139 cds supercontig:TcelY94_1.0:DF933843.1:127452:128501:-1 gene:TCE0_047r17709 gene_biotype:protein_coding transcript_biotype:protein_coding description:hypothetical protein	1e-164	97.1014	0	0	0.882217	Ascomycota	NA	UniRef90_A0A2H3IEU2 Uncharacterized protein n=2 Tax=Eurotiales TaxID=5042 RepID=A0A2H3IEU2_9EURO	No hit	0	0	1	No hit	0	0	0
AS_DN91369_c0_g1	KFX52296 cds supercontig:ASM75011v1:scf003:564406:566105:-1 gene:GQ26_0032010 gene_biotype:protein_coding transcript_biotype:protein_coding description:Sphingolipid long chain base-responsive protein PIL1	2e-112	89.0966	0	0	0.871548	Ascomycota	NA	UniRef90_B8MH01 Cell wall integrity signaling protein Lsp1/Pil1, putative n=6 Tax=Eurotiales TaxID=5042 RepID=B8MH01_TALSN	No hit	0	0	1	No hit	0	0	0
AS_DN93434_c0_g1	KFX46809 cds supercontig:ASM75011v1:scf017:241553:242877:-1 gene:GQ26_0170840 gene_biotype:protein_coding transcript_biotype:protein_coding description:ATP-dependent RNA helicase sub2	0	89.9796	0	0	0.866744	Ascomycota	NA	UniRef90_A0A093V3Q2 ATP-dependent RNA helicase sub2 n=3 Tax=Talaromyces marneffei TaxID=37727 RepID=A0A093V3Q2_TALMA	No hit	0	0	1	No hit	0	gnl|TC-DB|Q07478|3.A.22.1.1 ATP-dependent RNA helicase SUB2 OS=Saccharomyces cerevisiae (strain ATCC 204508 / S288c) GN=SUB2 PE=1 SV=1	71.1656
AS_DN127102_c0_g1	KFX41311 cds supercontig:ASM75011v1:scf063:11838:12659:-1 gene:GQ26_0630030 gene_biotype:protein_coding transcript_biotype:protein_coding description:SAP domain-containing ribonucleoprotein	3e-102	83.0645	0	0	0.839365	Ascomycota	NA	UniRef90_A0A2H3J0G7 DNA-binding SAP n=4 Tax=Eurotiales TaxID=5042 RepID=A0A2H3J0G7_9EURO	No hit	0	0	1	No hit	0	0	0
AS_DN78784_c0_g1	KFX51296 cds supercontig:ASM75011v1:scf005:368685:371722:-1 gene:GQ26_0051300 gene_biotype:protein_coding transcript_biotype:protein_coding description:pH-response regulator protein palH/RIM21	1e-50	79.4872	0	0	0.777337	Ascomycota	NA	UniRef90_A0A2H3I044 PalH/RIM21 n=1 Tax=Penicillium occitanis TaxID=290292 RepID=A0A2H3I044_9EURO	No hit	0	0	1	No hit	0	0	0
AS_DN93916_c0_g1	GAM33428 cds supercontig:TcelY94_1.0:DF933800.1:341817:343918:-1 gene:TCE0_004r00312 gene_biotype:protein_coding transcript_biotype:protein_coding description:mitochondrial heat shock protein	2e-142	97.3064	0	0	0.769024	Ascomycota	Heat shock protein 60 (Fragment)	UniRef90_B8MK05 Antigenic mitochondrial protein HSP60, putative n=3 Tax=Eurotiales TaxID=5042 RepID=B8MK05_TALSN	Hsp60	0	0	1	No hit	0	0	0
AS_DN115551_c0_g1	KFX52217 cds supercontig:ASM75011v1:scf003:406862:411010:-1 gene:GQ26_0031470 gene_biotype:protein_coding transcript_biotype:protein_coding description:26S proteasome non-ATPase regulatory subunit 1	1e-155	90.5797	0	0	0.736192	Ascomycota	NA	UniRef90_B8MHU6 26S proteasome regulatory subunit RPN2 n=4 Tax=Talaromyces TaxID=5094 RepID=B8MHU6_TALSN	No hit	0	0	1	No hit	0	0	0
AS_DN19216_c0_g1	KFX43398 cds supercontig:ASM75011v1:scf035:6705:8144:-1 gene:GQ26_0350030 gene_biotype:protein_coding transcript_biotype:protein_coding description:hypothetical protein	4e-124	92.4092	0	0	0.53078	Ascomycota	NA	UniRef90_B8M733 Uncharacterized protein n=1 Tax=Talaromyces stipitatus (strain ATCC 10500 / CBS 375.48 / QM 6759 / NRRL 1006)TaxID=441959 RepID=B8M733_TALSN	No hit	0	0	1	No hit	0	0	0

## Sheet: Hybrid 11648
ID	Blastn hit (against all Talaromyces genomes)	E-value	Identity (%)	Leaf mean expression (TPM)	Stem mean expression (TPM)	Root mean expression (TPM)	Classification	Pannzer Annotation	Blast Uniref90 annotation	HSP db classification	Leaf SPM	Stem SPM	Root SPM	CAZy	SignalP	TCDB hit description	TCDB Alignment cov (%)
HY_DN39331_c2_g1	KFX47104 cds supercontig:ASM75011v1:scf016:391874:394521:-1 gene:GQ26_0161420 gene_biotype:protein_coding transcript_biotype:protein_coding description:Heat shock 70 kDa protein	8e-142	91.2281	222.736	83.5114	413.131	Ascomycota	NA	UniRef90_A0A0L1ISR5 Heat shock protein n=1 Tax=Aspergillus nomius NRRL 13137 TaxID=1509407 RepID=A0A0L1ISR5_ASPNO	Hsp70	0.585904	0.480474	0.65258	No hit	0	gnl|TC-DB|P10591|3.A.16.1.6 Heat shock protein SSA1 OS=Saccharomyces cerevisiae (strain ATCC 204508 / S288c) OX=559292 GN=SSA1 PE=1 SV=4	94.7368
HY_DN38819_c4_g2	KFX50753 cds supercontig:ASM75011v1:scf006:171384:173946:-1 gene:GQ26_0060610 gene_biotype:protein_coding transcript_biotype:protein_coding description:Elongation factor 1-alpha	5e-170	86.7089	19.2943	70.6662	106.138	Ascomycota	Translation elongation factor 1 alpha subunit (Fragment)	UniRef90_A0A023VWL2 Translation elongation factor 1 alpha subunit (Fragment) n=2 Tax=leotiomyceta TaxID=716546 RepID=A0A023VWL2_9EURO	No hit	0.42935	0.609296	0.666646	No hit	0	0	0
HY_DN36716_c2_g1	KFX47104 cds supercontig:ASM75011v1:scf016:391874:394521:-1 gene:GQ26_0161420 gene_biotype:protein_coding transcript_biotype:protein_coding description:Heat shock 70 kDa protein	1e-100	86.3095	0.111122	0	37.8592	Ascomycota	NA	UniRef90_A5HVI6 Heat shock protein 70 (Fragment) n=1 Tax=Paracoccidioides brasiliensis TaxID=121759 RepID=A5HVI6_PARBR	Hsp70	0.0287783	0	0.999586	No hit	0	gnl|TC-DB|P10591|3.A.16.1.6 Heat shock protein SSA1 OS=Saccharomyces cerevisiae (strain ATCC 204508 / S288c) OX=559292 GN=SSA1 PE=1 SV=4	96.4286
HY_DN36716_c3_g1	CRG83199 cds supercontig:PIS:WF-38-12_scaffold00001:1861906:1863876:-1 gene:PISL3812_00549 gene_biotype:protein_coding transcript_biotype:protein_coding description:Heat shock 70 kDa protein	7e-159	85.9539	0	0	32.6951	Ascomycota	Heat shock protein 70 (Fragment)	UniRef90_A0A0G2EXE1 Putative hsp70-like protein n=1 Tax=Diplodia seriata TaxID=420778 RepID=A0A0G2EXE1_9PEZI	Hsp70	0	0	1	No hit	0	gnl|TC-DB|P10591|3.A.16.1.6 Heat shock protein SSA1 OS=Saccharomyces cerevisiae (strain ATCC 204508 / S288c) OX=559292 GN=SSA1 PE=1 SV=4	92.4528
HY_DN30961_c0_g1	EED12186 cds supercontig:JCVI-TSTA1-3.0:scf_1105507295517:664280:664995:-1 gene:TSTA_002520 gene_biotype:protein_coding transcript_biotype:protein_coding description:heat shock protein Hsp30/Hsp42, putative	3e-113	76.0784	0.216381	0.0522688	26.4238	Ascomycota	Heat shock protein 30	UniRef90_A0A2H3J0Z6 HSP20-like chaperone n=1 Tax=Penicillium occitanis TaxID=290292 RepID=A0A2H3J0Z6_9EURO	ACD	0.0590429	0.0153571	0.998137	No hit	0	0	0
HY_DN29838_c0_g1	KFX46713 cds supercontig:ASM75011v1:scf017:28661:29178:-1 gene:GQ26_0170120 gene_biotype:protein_coding transcript_biotype:protein_coding description:12 kDa heat shock protein	1e-90	84.5029	0	0.0833642	23.693	Ascomycota	Chaperone/heat shock protein Hsp12	UniRef90_A0A2H3IMJ7 Heat shock protein 9/12 n=1 Tax=Penicillium occitanis TaxID=290292 RepID=A0A2H3IMJ7_9EURO	No hit	0	0.0249636	0.999688	No hit	0	0	0
HY_DN10827_c0_g1	OKL59070 cds supercontig:ASM190759v1:scaffold_7:1185243:1187269:-1 gene:UA08_05850 gene_biotype:protein_coding transcript_biotype:protein_coding description:Heat shock protein	1e-130	90.5983	0	0	21.6277	Ascomycota	Heat shock protein 70 (Fragment)	UniRef90_A0A0J6YS34 Heat shock 70 kDa protein n=1 Tax=Coccidioides immitis RMSCC 2394 TaxID=404692 RepID=A0A0J6YS34_COCIT	Hsp70	0	0	1	No hit	0	gnl|TC-DB|P10591|3.A.16.1.6 Heat shock protein SSA1 OS=Saccharomyces cerevisiae (strain ATCC 204508 / S288c) OX=559292 GN=SSA1 PE=1 SV=4	87.1795
HY_DN32677_c0_g1	EEA20832 cds supercontig:JCVI-PMFA1-2.0:scf_1105668340738:2110747:2112538:1 gene:PMAA_046520 gene_biotype:protein_coding transcript_biotype:protein_coding description:heat shock protein,putative	0	78.7105	0.0176356	0.0583893	19.7877	Ascomycota	Heat shock protein Hsp20	UniRef90_A0A2H3IPC9 Complex 1 LYR protein n=1 Tax=Penicillium occitanis TaxID=290292 RepID=A0A2H3IPC9_9EURO	ACD	0.00576021	0.0186983	0.999809	No hit	0	0	0
HY_DN39331_c3_g1	CRG83199 cds supercontig:PIS:WF-38-12_scaffold00001:1861906:1863876:-1 gene:PISL3812_00549 gene_biotype:protein_coding transcript_biotype:protein_coding description:Heat shock 70 kDa protein	3e-102	79.5062	0.064832	0	19.6622	Ascomycota	Heat shock 70 kd protein cognate 1	UniRef90_A5HVI6 Heat shock protein 70 (Fragment) n=1 Tax=Paracoccidioides brasiliensis TaxID=121759 RepID=A5HVI6_PARBR	Hsp70	0.0207388	0	0.999785	No hit	0	gnl|TC-DB|P10591|3.A.16.1.6 Heat shock protein SSA1 OS=Saccharomyces cerevisiae (strain ATCC 204508 / S288c) OX=559292 GN=SSA1 PE=1 SV=4	96.2963
HY_DN38417_c0_g2	CRG85717 cds supercontig:PIS:WF-38-12_scaffold00002:2535545:2537050:1 gene:PISL3812_02740 gene_biotype:protein_coding transcript_biotype:protein_coding description:ADP,ATP carrier protein	4e-107	77.3176	0	0	16.1227	Ascomycota	NA	UniRef90_A0A0F7TGZ0 Putative ADP,ATP carrier protein n=12 Tax=Aspergillaceae TaxID=1131492 RepID=A0A0F7TGZ0_9EURO	No hit	0	0	1	No hit	0	gnl|TC-DB|P18239|2.A.29.1.7 ADP,ATP carrier protein 2 - Saccharomyces cerevisiae (Baker's yeast).	81.6568
HY_DN19574_c0_g1	EED15041 cds supercontig:JCVI-TSTA1-3.0:scf_1105507295515:1301029:1303167:-1 gene:TSTA_045050 gene_biotype:protein_coding transcript_biotype:protein_coding description:molecular chaperone Hsp70	7e-78	82.7273	0	0	13.2068	Ascomycota	NA	UniRef90_Q6QZR2 70 kDa heat shock protein (Fragment) n=1 Tax=Arthroderma otae TaxID=63405 RepID=Q6QZR2_ARTOT	Hsp70	0	0	1	No hit	0	gnl|TC-DB|P10591|3.A.16.1.6 Heat shock protein SSA1 OS=Saccharomyces cerevisiae (strain ATCC 204508 / S288c) OX=559292 GN=SSA1 PE=1 SV=4	95.4545
[truncated: 359 more rows]
