# Supplementary material for: Fungal communities represent the majority of root-specific transcripts in the transcriptomes of Agave plants grown in semiarid regions
Source: PeerJ. 2022 May 2;10:e13252. doi: 10.7717/peerj.13252 (PMC9070324; doi:10.7717/peerj.13252)
Supplement: Supplemental Information 9 — We did a BLASTn (E-value 1e−10) of all fungal transcripts against a set of concatenated genomes of Glomeromycota available at Ensembl Fungi release 46. We selected only blast hits with alignment coverage above 70%. [file peerj-10-13252-s009.xlsx]

## Sheet: Agave fourcroydes
ID	Blast hit	E-value	Alignment coverage	Leaf mean expression (TPM)	Stem mean expression (TPM)	Root mean expression (TPM)	Classification	Pannzer Annotation	Blast Uniref90 annotation
AF_DN39498_c0_g1	CEG73733 cds supercontig:RMATCC62417_Allpaths-LG:SCAF32:63661:65980:1 gene:RMATCC62417_09058 gene_biotype:protein_coding transcript_biotype:protein_coding gene_symbol:RMATCC62417_09058 description:Putative KLLA0E20527p	8e-121	79.922	13.3485	39.4258	63.6339	Asco or Basidio	Heat shock protein 70	UniRef90_A0A0K3CRW7 BY PROTMAP: gi|323338896|gb|EGA80110.1| Ssa1p [Saccharomyces cerevisiae Vin13] n=2 Tax=Basidiomycota TaxID=5204 RepID=A0A0K3CRW7_RHOTO
AF_DN38719_c1_g1	ORZ02414 cds supercontig:Synrac1:BCR43scaffold_1:750141:750863:-1 gene:BCR43DRAFT_509592 gene_biotype:protein_coding transcript_biotype:protein_coding description:60S ribosomal protein L10-A	6e-81	79.0404	0.0372403	0	3.77272	Ascomycota	Large subunit ribosomal protein L10e	UniRef90_F8QWZ3 60S ribosomal protein L10-B n=1 Tax=Endocarpon pusillum TaxID=364733 RepID=F8QWZ3_9EURO
AF_DN1778_c0_g1	ORZ03839 cds supercontig:Synrac1:BCR43scaffold_1:4338565:4340841:1 gene:BCR43DRAFT_529193 gene_biotype:protein_coding transcript_biotype:protein_coding description:70 kDa heat shock protein 3	7e-70	78.9617	0	0	15.0783	Ascomycota	NA	UniRef90_A0A2A9P3N8 Uncharacterized protein n=1 Tax=Ophiocordyceps unilateralis TaxID=268505 RepID=A0A2A9P3N8_9HYPO
AF_DN86788_c0_g1	KFH62694 cds supercontig:Mort_vert_NRRL_6337_V1:KN042431:679923:682002:1 gene:MVEG_12086 gene_biotype:protein_coding transcript_biotype:protein_coding description:GTP-binding nuclear protein GSP1/Ran	4e-93	82.3529	0	0	3.0201	Ascomycota	GTP-binding nuclear protein (Fragment)	UniRef90_A0A2H3ELB8 GTP-binding nuclear protein n=1 Tax=Diplocarpon rosae TaxID=946125 RepID=A0A2H3ELB8_9HELO
AF_DN54159_c4_g3	EPB88587 cds supercontig:Muco_sp_1006Ph_V1:KE123948:56715:58905:-1 gene:HMPREF1544_04580 gene_biotype:protein_coding transcript_biotype:protein_coding description:heat shock protein HSS1	7e-96	79.1932	0	0	8.6667	Ascomycota	Heat shock protein 70 (Fragment)	UniRef90_A5HVI6 Heat shock protein 70 (Fragment) n=1 Tax=Paracoccidioides brasiliensis TaxID=121759 RepID=A5HVI6_PARBR
AF_DN44188_c2_g2	OAQ34541 cds supercontig:Mortierella_elongata_AG-77_v2.0:KV442017:565902:568930:-1 gene:K457DRAFT_28438 gene_biotype:protein_coding transcript_biotype:protein_coding description:hsp71-like protein	2e-141	82.6511	0	0	28.8199	Ascomycota	NA	UniRef90_Q92260 Heat shock 70 kDa protein (Fragment) n=1 Tax=Penicillium citrinum TaxID=5077 RepID=HSP70_PENCI
AF_DN23232_c0_g1	ORY97553 cds supercontig:Synrac1:BCR43scaffold_4:1088416:1089822:-1 gene:BCR43DRAFT_489966 gene_biotype:protein_coding transcript_biotype:protein_coding description:14-3-3 family protein epsilon	3e-39	73.6979	0	0.073932	3.6836	Ascomycota	NA	UniRef90_A0A093V7H3 14-3-3 protein like n=4 Tax=Eurotiales TaxID=5042 RepID=A0A093V7H3_TALMA
AF_DN55860_c0_g1	OAQ24311 cds supercontig:Mortierella_elongata_AG-77_v2.0:KV442097:143142:146548:1 gene:K457DRAFT_100782 gene_biotype:protein_coding transcript_biotype:protein_coding description:transitional endoplasmic reticulum ATPase	1e-66	82.807	0	0	2.72578	Ascomycota	NA	UniRef90_A0A0G4MS50 Uncharacterized protein (Fragment) n=1 Tax=Verticillium longisporum TaxID=100787 RepID=A0A0G4MS50_9PEZI
AF_DN90703_c0_g1	KFH62230 cds supercontig:Mort_vert_NRRL_6337_V1:KN042433:679913:682665:1 gene:MVEG_11868 gene_biotype:protein_coding transcript_biotype:protein_coding description:hypothetical protein	9e-74	81.2865	0	0	2.06246	Basidiomycota	NA	UniRef90_A0A161YJV2 Uncharacterized protein n=1 Tax=Colletotrichum tofieldiae TaxID=708197 RepID=A0A161YJV2_9PEZI
AF_DN106481_c0_g1	GBB98558 cds supercontig:RclarusHR1_1.0:BEXD01002513:71332:71843:-1 gene:RclHR1_03260016 gene_biotype:protein_coding transcript_biotype:protein_coding description:hypothetical protein	4e-112	88.0556	0	0.0921733	2.56255	Other fungi	Mismatch base pair and cruciform DNA recognition protein hmp1	UniRef90_U9TCH2 Mismatch base pair and cruciform DNA recognition protein hmp1 n=5 Tax=Rhizophagus irregularis TaxID=588596 RepID=U9TCH2_RHIID
AF_DN59168_c0_g1	ORY90377 cds supercontig:Synrac1:BCR43scaffold_12:152111:153665:-1 gene:BCR43DRAFT_480338 gene_biotype:protein_coding transcript_biotype:protein_coding description:enolase	6e-51	77.0667	0	0	1.74212	Basidiomycota	NA	UniRef90_A0A2G8SBX9 Uncharacterized protein n=1 Tax=Ganoderma sinense ZZ0214-1 TaxID=1077348 RepID=A0A2G8SBX9_9APHY
AF_DN93529_c0_g1	OAQ24229 cds supercontig:Mortierella_elongata_AG-77_v2.0:KV442098:28114:30444:1 gene:K457DRAFT_35978 gene_biotype:protein_coding transcript_biotype:protein_coding description:methionine adenosyltransferase	7e-72	76.5	0.0251424	0	1.97552	Ascomycota	S-adenosylmethionine synthetase	UniRef90_C4JQQ3 S-adenosylmethionine synthase n=21 Tax=Onygenales TaxID=33183 RepID=C4JQQ3_UNCRE
AF_DN43531_c0_g1	OAQ26144 cds supercontig:Mortierella_elongata_AG-77_v2.0:KV442070:155435:157856:1 gene:K457DRAFT_22547 gene_biotype:protein_coding transcript_biotype:protein_coding description:hsp70-like protein	2e-86	82.4147	0.307859	1.29679	65.1807	Basidiomycota	NA	UniRef90_A0A0H5QKC6 Uncharacterized protein (Fragment) n=1 Tax=Spongospora subterranea TaxID=70186 RepID=A0A0H5QKC6_9EUKA
AF_DN29168_c0_g1	ORY92075 cds supercontig:Synrac1:BCR43scaffold_10:717843:720354:-1 gene:BCR43DRAFT_558664 gene_biotype:protein_coding transcript_biotype:protein_coding description:heat shock protein 90-1	5e-36	75.6757	0	0	10.1792	Basidiomycota	NA	UniRef90_A0A1C7MFL1 ATP-dependent molecular chaperone HSP82 n=1 Tax=Grifola frondosa TaxID=5627 RepID=A0A1C7MFL1_GRIFR
AF_DN47931_c1_g2	ORY94643 cds supercontig:Synrac1:BCR43scaffold_7:747809:749314:-1 gene:BCR43DRAFT_525818 gene_biotype:protein_coding transcript_biotype:protein_coding description:elongation factor 1-alpha	1e-103	84.0278	0	0.133192	68.4386	Ascomycota	Translation elongation factor 1-alpha (Fragment)	UniRef90_C1IZV9 Translation elongation factor 1 alpha (Fragment) n=40 Tax=Pezizomycotina TaxID=147538 RepID=C1IZV9_9PEZI
AF_DN103552_c0_g1	ORZ03839 cds supercontig:Synrac1:BCR43scaffold_1:4338565:4340841:1 gene:BCR43DRAFT_529193 gene_biotype:protein_coding transcript_biotype:protein_coding description:70 kDa heat shock protein 3	1e-72	77.3224	0.054477	0	48.2402	Ascomycota	Heat shock protein 70 (Fragment)	UniRef90_A0A094BQN2 Uncharacterized protein n=1 Tax=Pseudogymnoascus sp. VKM F-3775 TaxID=1420901 RepID=A0A094BQN2_9PEZI
AF_DN106480_c0_g1	CEG66501 cds supercontig:RMATCC62417_Allpaths-LG:SCAF5:875596:877738:-1 gene:RMATCC62417_03068 gene_biotype:protein_coding transcript_biotype:protein_coding gene_symbol:RMATCC62417_03068 description:Putative 70 kDa heat shock protein 3	1e-77	77.0202	0	0	2.67481	Basidiomycota	Putative GTP-binding protein (Fragment)	UniRef90_A0A0D2N7U1 Uncharacterized protein n=7 Tax=Agaricales TaxID=5338 RepID=A0A0D2N7U1_9AGAR
AF_DN13060_c0_g1	OAQ36335 cds supercontig:Mortierella_elongata_AG-77_v2.0:KV442012:1089201:1091270:-1 gene:K457DRAFT_147549 gene_biotype:protein_coding transcript_biotype:protein_coding description:glyceraldehyde 3-phosphate dehydrogenase	2e-26	70.028	0	0	3.09569	Basidiomycota	NA	UniRef90_A0A1J3DHJ8 Uncharacterized protein (Fragment) n=3 Tax=Noccaea caerulescens TaxID=107243 RepID=A0A1J3DHJ8_NOCCA
AF_DN52052_c2_g1	ORY98446 cds supercontig:Synrac1:BCR43scaffold_3:39:2239:1 gene:BCR43DRAFT_454529 gene_biotype:protein_coding transcript_biotype:protein_coding description:hsp71-like protein	3e-83	81.7204	0.056978	0	48.2586	Ascomycota	NA	UniRef90_Q6QZR2 70 kDa heat shock protein (Fragment) n=1 Tax=Arthroderma otae TaxID=63405 RepID=Q6QZR2_ARTOT
AF_DN71645_c0_g1	ORX56345 cds supercontig:Hesve2:DM01scaffold_10:539607:541455:1 gene:DM01DRAFT_1388601 gene_biotype:protein_coding transcript_biotype:protein_coding description:glyceraldehyde-3-phosphate dehydrogenase	9e-39	77.044	0	0	2.97047	Ascomycota	Glyceraldehyde-3-phosphate dehydrogenase, type I (Fragment)	UniRef90_A0A150VFD1 Glyceraldehyde-3-phosphate dehydrogenase n=1 Tax=Acidomyces richmondensis BFW TaxID=766039 RepID=A0A150VFD1_9PEZI
AF_DN24570_c0_g1	ORZ06679 cds supercontig:Absrep1:BCR42scaffold_38:243127:246386:-1 gene:BCR42DRAFT_426969 gene_biotype:protein_coding transcript_biotype:protein_coding description:elongation factor 2	8e-80	80.6373	0	0	1.5597	Basidiomycota	Translation elongation factor 2 (Fragment)	UniRef90_A0A0D7AT09 Putative EFT2-translation elongation factor eEF2 (Fragment) n=2 Tax=Cylindrobasidium torrendii FP15055 ss-10 TaxID=1314674 RepID=A0A0D7AT09_9AGAR
AF_DN78793_c0_g1	ORY96550 cds supercontig:Synrac1:BCR43scaffold_5:1128080:1129570:1 gene:BCR43DRAFT_563833 gene_biotype:protein_coding transcript_biotype:protein_coding description:S-adenosylmethionine synthase	3e-59	76.087	0	0	1.11384	Basidiomycota	NA	UniRef90_A0A165HMG0 S-adenosylmethionine synthase n=2 Tax=Exidia glandulosa HHB12029 TaxID=1314781 RepID=A0A165HMG0_EXIGL
AF_DN45026_c1_g1	ORZ01403 cds supercontig:Synrac1:BCR43scaffold_2:3579121:3580260:1 gene:BCR43DRAFT_453909 gene_biotype:protein_coding transcript_biotype:protein_coding description:glyceraldehyde-3-phosphate dehydrogenase	9e-143	72.7451	0	0.0094853	8.13206	Basidiomycota	Glyceraldehyde-3-phosphate dehydrogenase	UniRef90_A0A0H2SNU1 Glyceraldehyde-3-phosphate dehydrogenase n=1 Tax=Schizopora paradoxa TaxID=27342 RepID=A0A0H2SNU1_9HOMO
AF_DN89570_c0_g1	OZJ02540 cds supercontig:ASM226119v1:scaffold_145:34467:36305:1 gene:BZG36_04141 gene_biotype:protein_coding transcript_biotype:protein_coding description:Tubulin beta-4 chain	7e-98	76.2931	0	0	1.51099	Basidiomycota	Tubulin beta chain	UniRef90_A0A165M996 Tubulin beta chain (Fragment) n=1 Tax=Exidia glandulosa HHB12029 TaxID=1314781 RepID=A0A165M996_EXIGL
AF_DN46089_c1_g1	CDS05938 cds supercontig:Lramosa_hybrid_454_Illumina:LK023318.1:240704:241755:1 gene:LRAMOSA08466 gene_biotype:protein_coding transcript_biotype:protein_coding gene_symbol:LRAMOSA08466 description:Putative ADP,ATP carrier protein 1,mitochondrial	8e-61	70.3226	0.270067	0.595525	69.1987	Basidiomycota	ADP/ATP carrier protein (Fragment)	UniRef90_A0A165T2E3 Eukaryotic ADP/ATP carrier n=2 Tax=Agaricomycetes TaxID=155619 RepID=A0A165T2E3_9APHY
AF_DN87360_c0_g1	ORZ08113 cds supercontig:Absrep1:BCR42scaffold_32:99360:102328:-1 gene:BCR42DRAFT_455654 gene_biotype:protein_coding transcript_biotype:protein_coding description:aconitate hydratase	3e-73	78.6787	0	0	1.24696	Basidiomycota	NA	UniRef90_F8QAI6 Aconitate hydratase, mitochondrial n=6 Tax=Boletales TaxID=68889 RepID=F8QAI6_SERL3
AF_DN93780_c0_g1	OAQ26144 cds supercontig:Mortierella_elongata_AG-77_v2.0:KV442070:155435:157856:1 gene:K457DRAFT_22547 gene_biotype:protein_coding transcript_biotype:protein_coding description:hsp70-like protein	2e-71	76.7442	0	0	10.563	Basidiomycota	Heat shock protein HSS1 (Fragment)	UniRef90_G4T8Z4 Related to HSP70 heat shock protein 70 (Hsp70) n=2 Tax=Serendipita TaxID=358905 RepID=G4T8Z4_SERID
AF_DN84175_c0_g1	OAQ28255 cds supercontig:Mortierella_elongata_AG-77_v2.0:KV442050:327607:331214:-1 gene:K457DRAFT_138921 gene_biotype:protein_coding transcript_biotype:protein_coding description:cell division/GTP binding protein	9e-118	71.174	0	0	2.45927	Basidiomycota	Cell division control protein 10	UniRef90_A0A165F3D6 Cell division/GTP binding protein n=1 Tax=Exidia glandulosa HHB12029 TaxID=1314781 RepID=A0A165F3D6_EXIGL
AF_DN36099_c1_g1	ORZ01403 cds supercontig:Synrac1:BCR43scaffold_2:3579121:3580260:1 gene:BCR43DRAFT_453909 gene_biotype:protein_coding transcript_biotype:protein_coding description:glyceraldehyde-3-phosphate dehydrogenase	4e-89	75.9596	0	0	2.84543	Ascomycota	Glyceraldehyde 3-phosphate dehydrogenase	UniRef90_A0A1Y2LVC8 Glyceraldehyde-3-phosphate dehydrogenase n=1 Tax=Epicoccum nigrum TaxID=105696 RepID=A0A1Y2LVC8_EPING
AF_DN92522_c0_g1	OAQ32173 cds supercontig:Mortierella_elongata_AG-77_v2.0:KV442026:398997:400692:-1 gene:K457DRAFT_1817253 gene_biotype:protein_coding transcript_biotype:protein_coding description:60S ribosomal protein L7a	2e-40	70.5314	0	0	1.88731	Basidiomycota	NA	No hits
AF_DN51128_c6_g2	ORY92075 cds supercontig:Synrac1:BCR43scaffold_10:717843:720354:-1 gene:BCR43DRAFT_558664 gene_biotype:protein_coding transcript_biotype:protein_coding description:heat shock protein 90-1	3e-28	70.4403	35.063	123.085	121.531	Ascomycota	NA	UniRef90_A0A167W9E3 ATP-dependent molecular chaperone HSC82 n=1 Tax=Ascosphaera apis ARSEF 7405 TaxID=392613 RepID=A0A167W9E3_9EURO
AF_DN37348_c0_g1	OAQ26144 cds supercontig:Mortierella_elongata_AG-77_v2.0:KV442070:155435:157856:1 gene:K457DRAFT_22547 gene_biotype:protein_coding transcript_biotype:protein_coding description:hsp70-like protein	4e-88	79.6992	25.5044	38.0305	97.4102	Basidiomycota	Heat shock protein 70 (Fragment)	UniRef90_A0A165EBL4 Heat shock protein HSS1 n=1 Tax=Exidia glandulosa HHB12029 TaxID=1314781 RepID=A0A165EBL4_EXIGL
AF_DN33367_c0_g1	OZJ01512 cds supercontig:ASM226119v1:scaffold_327:2781:3842:1 gene:BZG36_05579 gene_biotype:protein_coding transcript_biotype:protein_coding description:hypothetical protein	2e-40	74.1935	0	0	3.58471	Ascomycota	NA	UniRef90_A0A1Y1NCW5 Uncharacterized protein (Fragment) n=1 Tax=Photinus pyralis TaxID=7054 RepID=A0A1Y1NCW5_PHOPY
AF_DN76742_c0_g1	OZJ04187 cds supercontig:ASM226119v1:scaffold_50:83551:86160:1 gene:BZG36_02190 gene_biotype:protein_coding transcript_biotype:protein_coding description:Elongation factor 2	3e-99	82.2989	0	0	2.4759	Ascomycota	NA	UniRef90_D5GER4 Uncharacterized protein n=1 Tax=Tuber melanosporum (strain Mel28) TaxID=656061 RepID=D5GER4_TUBMM
AF_DN104823_c0_g1	OZJ06083 cds supercontig:ASM226119v1:scaffold_7:211676:213236:1 gene:BZG36_01116 gene_biotype:protein_coding transcript_biotype:protein_coding description:Citrate synthase, mitochondrial	3e-29	70.2703	0	0	2.29201	Basidiomycota	Citrate synthase	UniRef90_A0A0H2RLQ4 Citrate synthase n=1 Tax=Schizopora paradoxa TaxID=27342 RepID=A0A0H2RLQ4_9HOMO
AF_DN83601_c0_g1	ORZ03839 cds supercontig:Synrac1:BCR43scaffold_1:4338565:4340841:1 gene:BCR43DRAFT_529193 gene_biotype:protein_coding transcript_biotype:protein_coding description:70 kDa heat shock protein 3	4e-67	80.0595	0	0	13.5845	Ascomycota	NA	UniRef90_A0A0G4KI51 Uncharacterized protein (Fragment) n=1 Tax=Verticillium longisporum TaxID=100787 RepID=A0A0G4KI51_9PEZI
AF_DN50952_c3_g1	ORY91890 cds supercontig:Synrac1:BCR43scaffold_10:281238:282840:1 gene:BCR43DRAFT_478943 gene_biotype:protein_coding transcript_biotype:protein_coding description:ATP-dependent RNA helicase eIF4A	0	76.5743	0.00651663	0.0161072	24.8831	Ascomycota	Eukaryotic translation initiation factor 4	UniRef90_W9XLK2 ATP-dependent RNA helicase eIF4A n=1 Tax=Capronia epimyces CBS 606.96 TaxID=1182542 RepID=W9XLK2_9EURO
AF_DN58592_c0_g1	ORE05171 cds supercontig:Rhimi_ATCC52814_1:KV921951:8845:9920:1 gene:BCV72DRAFT_306632 gene_biotype:protein_coding transcript_biotype:protein_coding description:ADP,ATP carrier protein	3e-63	79.351	0	0	6.89148	Basidiomycota	ATP:ADP antiporter	UniRef90_A0A151WE38 ADP,ATP carrier protein n=21 Tax=Agaricomycetes TaxID=155619 RepID=A0A151WE38_HYPMA
AF_DN1380_c0_g1	OAQ34032 cds supercontig:Mortierella_elongata_AG-77_v2.0:KV442019:693045:695690:1 gene:K457DRAFT_134350 gene_biotype:protein_coding transcript_biotype:protein_coding description:DnaK-type molecular chaperone bipA	7e-70	75.6303	0	0	2.30328	Ascomycota	NA	UniRef90_A0A0J8RFI9 Heat shock 70 kDa protein C n=1 Tax=Coccidioides immitis H538.4 TaxID=396776 RepID=A0A0J8RFI9_COCIT
AF_DN8522_c0_g1	OAQ34032 cds supercontig:Mortierella_elongata_AG-77_v2.0:KV442019:693045:695690:1 gene:K457DRAFT_134350 gene_biotype:protein_coding transcript_biotype:protein_coding description:DnaK-type molecular chaperone bipA	3e-93	82.6772	0	0	2.90046	Ascomycota	NA	UniRef90_P83616 Endoplasmic reticulum chaperone BiP n=35 Tax=Aspergillaceae TaxID=1131492 RepID=BIP_ASPNG
AF_DN66852_c0_g1	ORY96723 cds supercontig:Synrac1:BCR43scaffold_5:1569639:1570775:1 gene:BCR43DRAFT_492163 gene_biotype:protein_coding transcript_biotype:protein_coding description:60S ribosomal protein L15	1e-87	80.7339	0	0.05486	6.56774	Ascomycota	Ribosomal protein L15 (Fragment)	UniRef90_A0A179GQF2 Ribosomal protein L15 n=2 Tax=Purpureocillium lilacinum TaxID=33203 RepID=A0A179GQF2_9HYPO
AF_DN51821_c5_g1	ORY94643 cds supercontig:Synrac1:BCR43scaffold_7:747809:749314:-1 gene:BCR43DRAFT_525818 gene_biotype:protein_coding transcript_biotype:protein_coding description:elongation factor 1-alpha	5e-137	86.1996	0.497545	0.812537	168.953	Ascomycota	NA	UniRef90_D6QT61 Elongation factor 1-alpha (Fragment) n=1 Tax=Rhizoplaca chrysoleuca TaxID=112062 RepID=D6QT61_9LECA
AF_DN54739_c0_g1	ORZ01392 cds supercontig:Synrac1:BCR43scaffold_2:3554461:3556699:1 gene:BCR43DRAFT_522244 gene_biotype:protein_coding transcript_biotype:protein_coding description:ATP synthase subunit beta	1e-154	78.9555	0	0	2.765	Basidiomycota	ATP synthase subunit beta	UniRef90_A8NEG5 ATP synthase subunit beta (Fragment) n=1 Tax=Coprinopsis cinerea (strain Okayama-7 / 130 / ATCC MYA-4618/ FGSC 9003) TaxID=240176 RepID=A8NEG5_COPC7
AF_DN42526_c0_g2	ORZ07214 cds supercontig:Lobtra1:BCR41scaffold_42:18595:19977:1 gene:BCR41DRAFT_310938 gene_biotype:protein_coding transcript_biotype:protein_coding description:translation elongation factor	1e-88	78.7654	0	0	17.9298	Ascomycota	Translation elongation factor 1-alpha (Fragment)	UniRef90_A0A023VWL2 Translation elongation factor 1 alpha subunit (Fragment) n=2 Tax=leotiomyceta TaxID=716546 RepID=A0A023VWL2_9EURO
AF_DN94972_c0_g1	OAQ24371 cds supercontig:Mortierella_elongata_AG-77_v2.0:KV442095:16276:18465:-1 gene:K457DRAFT_141967 gene_biotype:protein_coding transcript_biotype:protein_coding description:tubulin alpha-1C chain-like protein	1e-64	73.251	0	0	1.92207	Basidiomycota	NA	UniRef90_A0A182WE44 Uncharacterized protein n=1 Tax=Anopheles minimus TaxID=112268 RepID=A0A182WE44_9DIPT
AF_DN55382_c0_g1	OZJ02937 cds supercontig:ASM226119v1:scaffold_115:1651:2700:-1 gene:BZG36_04553 gene_biotype:protein_coding transcript_biotype:protein_coding description:14-3-3 protein epsilon	5e-43	75	0	0	1.85261	Basidiomycota	Post-transcriptional level proteome regulator	UniRef90_A1YW93 14-3-3-like protein n=1 Tax=Physarum polycephalum TaxID=5791 RepID=A1YW93_PHYPO
AF_DN51128_c6_g1	CDH57487 cds supercontig:454Minimus:SCAF00046:213158:215433:1 gene:LCOR_08417.1 gene_biotype:protein_coding transcript_biotype:protein_coding gene_symbol:LCOR_08417.1 description:heat shock protein 90	7e-78	73.3871	0	0.359388	86.047	Basidiomycota	NA	UniRef90_A0A0C3MM95 Uncharacterized protein n=1 Tax=Tulasnella calospora MUT 4182 TaxID=1051891 RepID=A0A0C3MM95_9HOMO
AF_DN76162_c0_g1	OAQ34104 cds supercontig:Mortierella_elongata_AG-77_v2.0:KV442018:88977:90478:1 gene:K457DRAFT_147908 gene_biotype:protein_coding transcript_biotype:protein_coding description:60S ribosomal protein L7	7e-60	77.381	0	0	3.01458	Ascomycota	NA	UniRef90_A0A0L0NF04 Uncharacterized protein n=1 Tax=Tolypocladium ophioglossoides CBS 100239 TaxID=1163406 RepID=A0A0L0NF04_9HYPO
AF_DN100209_c0_g1	ORZ13794 cds supercontig:Lobtra1:BCR41scaffold_22:123395:124843:-1 gene:BCR41DRAFT_381170 gene_biotype:protein_coding transcript_biotype:protein_coding description:mitochondrial carrier domain-containing protein	2e-55	80.4487	0	0	1.8484	Asco or Basidio	NA	No hits
AF_DN36099_c0_g1	CEG72784 cds supercontig:RMATCC62417_Allpaths-LG:SCAF25:302738:304073:-1 gene:RMATCC62417_08275 gene_biotype:protein_coding transcript_biotype:protein_coding gene_symbol:RMATCC62417_08275 description:Putative Glyceraldehyde-3-phosphate dehydrogenase 1	9e-60	72.1088	0	0	2.78939	Ascomycota	Glyceraldehyde 3-phosphate dehydrogenase (Fragment)	UniRef90_Q5ISV0 Glyceraldehyde-3-phosphate dehydrogenase (Fragment) n=11 Tax=Stictidaceae TaxID=56757 RepID=Q5ISV0_9LECA
AF_DN53069_c3_g1	OAQ34323 cds supercontig:Mortierella_elongata_AG-77_v2.0:KV442018:797160:798877:-1 gene:K457DRAFT_88784 gene_biotype:protein_coding transcript_biotype:protein_coding description:mitochondrial carrier	1e-93	71.9078	0.060996	0.0249745	21.8797	Ascomycota	NA	UniRef90_Q0URL3 Uncharacterized protein n=16 Tax=Pleosporales TaxID=92860 RepID=Q0URL3_PHANO

## Sheet: Agave sisalana
ID	Blast hit	E-value	Alignment coverage	Leaf mean expression (TPM)	Stem mean expression (TPM)	Root mean expression (TPM)	Classification	Pannzer Annotation	Blast Uniref90 annotation
AS_DN50667_c0_g1	ORY99282 cds supercontig:Synrac1:BCR43scaffold_3:2347681:2348839:-1 gene:BCR43DRAFT_562573 gene_biotype:protein_coding transcript_biotype:protein_coding description:ADP,ATP carrier protein	1e-89	79.0196	0.0579415	0.0356122	47.8654	Ascomycota	ADP/ATP carrier protein (Fragment)	UniRef90_A0A0F7TGZ0 Putative ADP,ATP carrier protein n=12 Tax=Aspergillaceae TaxID=1131492 RepID=A0A0F7TGZ0_9EURO
AS_DN52190_c1_g1	OAQ33404 cds supercontig:Mortierella_elongata_AG-77_v2.0:KV442021:519510:522517:1 gene:K457DRAFT_89800 gene_biotype:protein_coding transcript_biotype:protein_coding description:heat shock protein 90	1e-134	79.0026	0	0	16.9335	Ascomycota	NA	UniRef90_A0A0D2BBE6 Hsp90-like protein n=1 Tax=Verruconis gallopava TaxID=253628 RepID=A0A0D2BBE6_9PEZI
AS_DN107606_c0_g1	CEJ00711 cds supercontig:Rmicro_CBS_344.29_Allpaths-LG:SCAF607:1576:4808:1 gene:RMCBS344292_14760 gene_biotype:protein_coding transcript_biotype:protein_coding gene_symbol:RMCBS344292_14760 description:Putative Ssa4p	1e-78	78.4615	0.0395873	0	2.24026	Ascomycota	NA	UniRef90_A0A0G2EA49 Putative hsp70-like protein n=1 Tax=Diplodia seriata TaxID=420778 RepID=A0A0G2EA49_9PEZI
AS_DN103542_c0_g1	ORZ11024 cds supercontig:Lobtra1:BCR41scaffold_29:405893:407503:-1 gene:BCR41DRAFT_409352 gene_biotype:protein_coding transcript_biotype:protein_coding description:mitochondrial ATP synthase-like protein beta subunit	3e-93	79.2717	0.039057	0	2.22195	Ascomycota	NA	UniRef90_B6QIQ4 ATP synthase subunit beta n=12 Tax=Eurotiomycetes TaxID=147545 RepID=B6QIQ4_TALMQ
AS_DN30106_c0_g1	OAD04254 cds supercontig:Mucci2:MUCCIscaffold_03:475617:477760:-1 gene:MUCCIDRAFT_177367 gene_biotype:protein_coding transcript_biotype:protein_coding description:hypothetical protein	1e-22	71.0526	0	0	24.0395	Ascomycota	Heat shock 70 kDa protein (Fragment)	UniRef90_A0A1J9PVV4 Hsp72-like protein n=1 Tax=Emergomyces pasteuriana Ep9510 TaxID=1447872 RepID=A0A1J9PVV4_9EURO
AS_DN37498_c0_g1	ORZ25983 cds supercontig:Absrep1:BCR42scaffold_1:3150696:3153009:1 gene:BCR42DRAFT_341428 gene_biotype:protein_coding transcript_biotype:protein_coding description:hsp71-like protein	1e-54	70.0637	0	0	2.9904	Ascomycota	Heat shock protein 70 (Fragment)	UniRef90_Q6QZR2 70 kDa heat shock protein (Fragment) n=1 Tax=Arthroderma otae TaxID=63405 RepID=Q6QZR2_ARTOT
AS_DN61161_c0_g1	GBC05930 cds supercontig:RclarusHR1_1.0:BEXD01004038:27227:27744:-1 gene:RclHR1_06500012 gene_biotype:protein_coding transcript_biotype:protein_coding description:hypothetical protein	1e-107	82.9396	0	0	2.48272	Other fungi	Heat shock protein HSP	UniRef90_A0A2H5RDB9 HSP20 family protein n=3 Tax=Rhizophagus irregularis TaxID=588596 RepID=A0A2H5RDB9_RHIID
AS_DN53419_c1_g1	OAD01283 cds supercontig:Mucci2:MUCCIscaffold_06:1978243:1980284:1 gene:MUCCIDRAFT_146440 gene_biotype:protein_coding transcript_biotype:protein_coding description:hypothetical protein	3e-111	78.1346	0	0	3.62567	Ascomycota	NA	UniRef90_A0A232M762 Uncharacterized protein n=1 Tax=Elaphomyces granulatus TaxID=519963 RepID=A0A232M762_9EURO
AS_DN53864_c3_g1	OAQ33404 cds supercontig:Mortierella_elongata_AG-77_v2.0:KV442021:519510:522517:1 gene:K457DRAFT_89800 gene_biotype:protein_coding transcript_biotype:protein_coding description:heat shock protein 90	1e-139	78.9196	2.90302	2.67371	99.5239	Ascomycota	NA	UniRef90_A0A0J0XBS3 Heat-shock protein 90 n=1 Tax=Cutaneotrichosporon oleaginosum TaxID=879819 RepID=A0A0J0XBS3_9TREE
AS_DN9968_c0_g1	OAQ32475 cds supercontig:Mortierella_elongata_AG-77_v2.0:KV442025:699819:700298:-1 gene:K457DRAFT_70613 gene_biotype:protein_coding transcript_biotype:protein_coding description:S-phase kinase-associated protein 1A-like protein	2e-91	82.7068	0	0	4.70065	Basidiomycota	Ubiquitin-protein ligase	UniRef90_A0A151VKS1 E3 ubiquitin ligase complex SCF subunit sconC n=48 Tax=Agaricomycetes TaxID=155619 RepID=A0A151VKS1_HYPMA
AS_DN54411_c1_g1	ORY99282 cds supercontig:Synrac1:BCR43scaffold_3:2347681:2348839:-1 gene:BCR43DRAFT_562573 gene_biotype:protein_coding transcript_biotype:protein_coding description:ADP,ATP carrier protein	5e-170	73.9356	0.0307294	0.0875304	28.9758	Ascomycota	Mitochondrial carrier	UniRef90_A0A0D1YZR9 ADP,ATP carrier protein n=6 Tax=Fungi TaxID=4751 RepID=A0A0D1YZR9_9PEZI
AS_DN120058_c0_g1	OAQ30286 cds supercontig:Mortierella_elongata_AG-77_v2.0:KV442036:367129:368745:-1 gene:K457DRAFT_1818944 gene_biotype:protein_coding transcript_biotype:protein_coding description:gamma-actin	8e-105	84.5771	0	0	2.83064	Ascomycota	Alpha-actin (Fragment)	UniRef90_Q9C149 Actin (Fragment) n=37 Tax=leotiomyceta TaxID=716546 RepID=Q9C149_PASFU
AS_DN63373_c0_g1	OAQ28755 cds supercontig:Mortierella_elongata_AG-77_v2.0:KV442046:274686:276551:1 gene:K457DRAFT_149343 gene_biotype:protein_coding transcript_biotype:protein_coding description:60S ribosomal protein L3	1e-95	73.3581	0.0196814	0	2.46383	Ascomycota	Structural constituent of ribosome	UniRef90_R1H169 Putative 60s ribosomal protein l3 protein n=5 Tax=Dothideomycetes incertae sedis TaxID=159987 RepID=R1H169_BOTPV
AS_DN57516_c1_g1	ORZ00681 cds supercontig:Synrac1:BCR43scaffold_2:1795837:1797338:-1 gene:BCR43DRAFT_452778 gene_biotype:protein_coding transcript_biotype:protein_coding description:elongation factor 1-alpha	0	86.2928	28.5885	42.9965	133.608	Ascomycota	Translation elongation factor 1 alpha subunit (Fragment)	UniRef90_A0A163GAQ2 Elongation factor 1-alpha n=1 Tax=Didymella rabiei TaxID=5454 RepID=A0A163GAQ2_DIDRA
AS_DN121472_c0_g1	PKY50762 cds supercontig:ASM159314v1:scaffold916_size29856:24837:25687:1 gene:RhiirA4_406835 gene_biotype:protein_coding transcript_biotype:protein_coding description:hypothetical protein	6e-135	93.7695	0	0	3.69371	Other fungi	Mismatch base pair and cruciform DNA recognition protein hmp1	UniRef90_U9TCB4 Mismatch base pair and cruciform DNA recognition protein hmp1 n=3 Tax=Rhizophagus irregularis TaxID=588596 RepID=U9TCB4_RHIID
AS_DN13420_c1_g1	ORZ01392 cds supercontig:Synrac1:BCR43scaffold_2:3554461:3556699:1 gene:BCR43DRAFT_522244 gene_biotype:protein_coding transcript_biotype:protein_coding description:ATP synthase subunit beta	2e-151	84.3034	0	0	1.43184	Basidiomycota	Mitochondrial F-ATPase beta subunit (Fragment)	UniRef90_A0A165EP22 ATP synthase subunit beta n=1 Tax=Exidia glandulosa HHB12029 TaxID=1314781 RepID=A0A165EP22_EXIGL
AS_DN113983_c0_g1	SAM06395 cds supercontig:AG_v1:scf_12745:126385:129752:1 gene:SAM06395 gene_biotype:protein_coding transcript_biotype:protein_coding gene_symbol:ABSGL_12284.1 scaffold 12745 description:hypothetical protein	1e-20	71.3262	0	0	1.34497	Basidiomycota	NA	UniRef90_A0A0H5REM1 Uncharacterized protein (Fragment) n=1 Tax=Spongospora subterranea TaxID=70186 RepID=A0A0H5REM1_9EUKA
AS_DN10845_c0_g1	OAQ34986 cds supercontig:Mortierella_elongata_AG-77_v2.0:KV442015:26615:28194:-1 gene:K457DRAFT_132884 gene_biotype:protein_coding transcript_biotype:protein_coding description:putative autophagy-related protein 8	1e-68	71.5054	0	0	4.72486	Basidiomycota	Probable ATG8-essential for autophagy	UniRef90_C0IQA9 Autophagy-related protein n=10 Tax=Basidiomycota TaxID=5204 RepID=C0IQA9_MONPR
AS_DN36058_c0_g1	OAQ34541 cds supercontig:Mortierella_elongata_AG-77_v2.0:KV442017:565902:568930:-1 gene:K457DRAFT_28438 gene_biotype:protein_coding transcript_biotype:protein_coding description:hsp71-like protein	3e-63	77.9661	0	0	4.79837	Basidiomycota	Heat shock protein 70 (Fragment)	UniRef90_A5HVI6 Heat shock protein 70 (Fragment) n=1 Tax=Paracoccidioides brasiliensis TaxID=121759 RepID=A5HVI6_PARBR
AS_DN129009_c0_g1	ORZ01392 cds supercontig:Synrac1:BCR43scaffold_2:3554461:3556699:1 gene:BCR43DRAFT_522244 gene_biotype:protein_coding transcript_biotype:protein_coding description:ATP synthase subunit beta	1e-76	83.8284	0	0.0824125	3.24898	Basidiomycota	ATP synthase, F1 beta subunit	UniRef90_A0A0D0A7V3 Unplaced genomic scaffold CY34scaffold_303, whole genome shotgun sequence n=1 Tax=Suillus luteus UH-Slu-Lm8-n1 TaxID=930992 RepID=A0A0D0A7V3_9HOMO
AS_DN20988_c0_g1	OAQ23161 cds supercontig:Mortierella_elongata_AG-77_v2.0:KV442128:66436:66839:1 gene:K457DRAFT_142961 gene_biotype:protein_coding transcript_biotype:protein_coding description:60S ribosomal protein L7	1e-71	81.5476	0	0.0580095	3.9841	Ascomycota	Ribosomal protein L7 (Fragment)	UniRef90_A0A0B8MYR7 Uncharacterized protein n=3 Tax=Eurotiales TaxID=5042 RepID=A0A0B8MYR7_9EURO
AS_DN127414_c0_g1	KFH61895 cds supercontig:Mort_vert_NRRL_6337_V1:KN042435:27803:30438:1 gene:MVEG_12229 gene_biotype:protein_coding transcript_biotype:protein_coding description:ATP synthase subunit beta, mitochondrial	5e-98	72.8324	0.0298801	0.0238403	3.786	Ascomycota	ATP synthase subunit beta	UniRef90_A0A0D1YD55 ATP synthase subunit beta n=1 Tax=Verruconis gallopava TaxID=253628 RepID=A0A0D1YD55_9PEZI
AS_DN96552_c0_g1	ORZ20605 cds supercontig:Absrep1:BCR42scaffold_6:1400149:1402782:1 gene:BCR42DRAFT_370438 gene_biotype:protein_coding transcript_biotype:protein_coding description:tubulin beta-1 chain	1e-48	77.129	0	0	2.31753	Other fungi	NA	UniRef90_A0A0H5B9I2 Betatubulin (Fragment) n=2 Tax=Pythiaceae TaxID=4782 RepID=A0A0H5B9I2_9STRA
AS_DN34827_c0_g1	OAQ33404 cds supercontig:Mortierella_elongata_AG-77_v2.0:KV442021:519510:522517:1 gene:K457DRAFT_89800 gene_biotype:protein_coding transcript_biotype:protein_coding description:heat shock protein 90	3e-119	83.0339	0.0293892	0	24.3304	Ascomycota	NA	UniRef90_A0A293MNR4 Uncharacterized protein (Fragment) n=1 Tax=Ornithodoros erraticus TaxID=265619 RepID=A0A293MNR4_ORNER
AS_DN90163_c0_g1	OAQ27045 cds supercontig:Mortierella_elongata_AG-77_v2.0:KV442060:30219:30890:-1 gene:K457DRAFT_149699 gene_biotype:protein_coding transcript_biotype:protein_coding description:60S ribosomal protein L11	7e-90	71.9444	0	0	1.44006	Ascomycota	Ribosomal protein L5	UniRef90_C4JUE2 60S ribosomal protein L11 n=2 Tax=Opisthokonta TaxID=33154 RepID=C4JUE2_UNCRE
AS_DN95827_c0_g1	PKY47745 cds supercontig:ASM159314v1:scaffold576_size71438:32815:34133:1 gene:RhiirA4_403729 gene_biotype:protein_coding transcript_biotype:protein_coding description:hypothetical protein	2e-111	88.8041	0	0	2.17691	Other fungi	NA	UniRef90_U9TNL7 Uncharacterized protein n=3 Tax=Rhizophagus irregularis TaxID=588596 RepID=U9TNL7_RHIID
AS_DN130523_c0_g1	PKC04356 cds supercontig:ASM159320v1:scaffold1023_size25144:18618:19348:-1 gene:RhiirA5_362417 gene_biotype:protein_coding transcript_biotype:protein_coding description:HSP20-like chaperone	4e-147	88.9807	0	0	2.96017	Other fungi	Molecular chaperone (Small heat shock protein)	UniRef90_U9ULB2 HSP20-like chaperone n=5 Tax=Rhizophagus irregularis TaxID=588596 RepID=U9ULB2_RHIID
AS_DN37213_c0_g1	OAD04254 cds supercontig:Mucci2:MUCCIscaffold_03:475617:477760:-1 gene:MUCCIDRAFT_177367 gene_biotype:protein_coding transcript_biotype:protein_coding description:hypothetical protein	6e-60	78.3172	0	0	3.40078	Ascomycota	NA	UniRef90_A5HVI6 Heat shock protein 70 (Fragment) n=1 Tax=Paracoccidioides brasiliensis TaxID=121759 RepID=A5HVI6_PARBR
AS_DN31245_c0_g1	EPB82842 cds supercontig:Muco_sp_1006Ph_V1:KE124096:32561:34051:1 gene:HMPREF1544_10409 gene_biotype:protein_coding transcript_biotype:protein_coding description:ATP-dependent RNA helicase eIF4A	4e-93	80.1802	0	0	4.97862	Ascomycota	NA	UniRef90_W9XLK2 ATP-dependent RNA helicase eIF4A n=1 Tax=Capronia epimyces CBS 606.96 TaxID=1182542 RepID=W9XLK2_9EURO
AS_DN37204_c0_g1	OAD05368 cds supercontig:Mucci2:MUCCIscaffold_03:3994498:3996708:-1 gene:MUCCIDRAFT_189295 gene_biotype:protein_coding transcript_biotype:protein_coding description:hypothetical protein	4e-63	76.4103	0	0	8.522	Ascomycota	Heat shock protein 70 (Fragment)	UniRef90_Q6QZR2 70 kDa heat shock protein (Fragment) n=1 Tax=Arthroderma otae TaxID=63405 RepID=Q6QZR2_ARTOT
AS_DN120595_c0_g1	EPB87980 cds supercontig:Muco_sp_1006Ph_V1:KE123959:148637:149181:-1 gene:HMPREF1544_05272 gene_biotype:protein_coding transcript_biotype:protein_coding description:eukaryotic translation initiation factor 5A	1e-41	75.5352	0	0	1.4214	Basidiomycota	Eukaryotic translation initiation factor 5A	UniRef90_A0A146H9G0 Eukaryotic translation initiation factor 5A n=1 Tax=Mycena chlorophos TaxID=658473 RepID=A0A146H9G0_9AGAR
AS_DN116262_c0_g1	GBC07051 cds supercontig:RclarusHR1_1.0:BEXD01004116:43069:44784:1 gene:RclHR1_07200009 gene_biotype:protein_coding transcript_biotype:protein_coding description:hypothetical protein	1e-118	85.5072	0	0	1.74121	Other fungi	NA	UniRef90_A0A015LIT2 Uncharacterized protein n=9 Tax=Rhizophagus irregularis TaxID=588596 RepID=A0A015LIT2_9GLOM
AS_DN5529_c0_g1	ORX50149 cds supercontig:Hesve2:DM01scaffold_24:142449:143477:-1 gene:DM01DRAFT_1337826 gene_biotype:protein_coding transcript_biotype:protein_coding description:ribosomal protein L15e	1e-109	81.2865	0	0	3.58725	Ascomycota	Ribosomal protein L15	UniRef90_A0A0D2CGL0 Ribosomal protein L15 n=1 Tax=Cladophialophora immunda TaxID=569365 RepID=A0A0D2CGL0_9EURO
AS_DN106517_c0_g1	OAQ35114 cds supercontig:Mortierella_elongata_AG-77_v2.0:KV442015:463307:464752:-1 gene:K457DRAFT_66735 gene_biotype:protein_coding transcript_biotype:protein_coding description:ATP synthase subunit beta	1e-73	73.8806	0	0.0366672	4.26741	Ascomycota	ATP synthase F1, beta subunit	UniRef90_B6QIQ4 ATP synthase subunit beta n=12 Tax=Eurotiomycetes TaxID=147545 RepID=B6QIQ4_TALMQ
AS_DN13148_c0_g1	CDH57487 cds supercontig:454Minimus:SCAF00046:213158:215433:1 gene:LCOR_08417.1 gene_biotype:protein_coding transcript_biotype:protein_coding gene_symbol:LCOR_08417.1 description:heat shock protein 90	8e-36	72	0	0	2.75127	Basidiomycota	NA	UniRef90_F4R5F2 Uncharacterized protein n=1 Tax=Melampsora larici-populina (strain 98AG31 / pathotype 3-4-7) TaxID=747676 RepID=F4R5F2_MELLP
AS_DN22511_c0_g1	OAQ24311 cds supercontig:Mortierella_elongata_AG-77_v2.0:KV442097:143142:146548:1 gene:K457DRAFT_100782 gene_biotype:protein_coding transcript_biotype:protein_coding description:transitional endoplasmic reticulum ATPase	1e-72	78.1711	0	0	2.23326	Ascomycota	NA	UniRef90_M3B5I3 Cell division control protein n=33 Tax=Eukaryota TaxID=2759 RepID=M3B5I3_SPHMS
AS_DN16256_c0_g1	EIE86745 cds supercontig:RO3:supercont3.9:983262:984079:-1 gene:RO3G_11456 gene_biotype:protein_coding transcript_biotype:protein_coding description:60S ribosomal protein L2	2e-48	70.6161	0.0155749	0	2.033	Ascomycota	Ribosomal protein L2, C-terminal	UniRef90_R7YWD1 60S ribosomal protein L2 n=1 Tax=Coniosporium apollinis (strain CBS 100218) TaxID=1168221 RepID=R7YWD1_CONA1
AS_DN62378_c0_g1	OZJ04318 cds supercontig:ASM226119v1:scaffold_45:4285:6076:-1 gene:BZG36_03155 gene_biotype:protein_coding transcript_biotype:protein_coding description:ATP synthase subunit alpha,mitochondrial	2e-137	79.8817	0	0	2.32231	Ascomycota	F-type H+-transporting ATPase subunit alpha	UniRef90_C4JIV7 ATP synthase F1, alpha subunit n=2 Tax=Onygenales TaxID=33183 RepID=C4JIV7_UNCRE
AS_DN38902_c0_g1	OZJ02462 cds supercontig:ASM226119v1:scaffold_150:22615:24708:-1 gene:BZG36_04103 gene_biotype:protein_coding transcript_biotype:protein_coding description:Heat shock protein 90	1e-46	76.1006	0	0	4.92717	Basidiomycota	Heat shock protein (Fragment)	UniRef90_A0A0C3MM95 Uncharacterized protein n=1 Tax=Tulasnella calospora MUT 4182 TaxID=1051891 RepID=A0A0C3MM95_9HOMO
AS_DN110206_c0_g1	PKC12373 cds supercontig:ASM159320v1:scaffold255_size103510:55938:57690:-1 gene:RhiirA5_353079 gene_biotype:protein_coding transcript_biotype:protein_coding description:hypothetical protein	3e-128	89.8072	0	0	1.79576	Other fungi	NA	UniRef90_A0A2H5U451 Uncharacterized protein n=6 Tax=Rhizophagus irregularis TaxID=588596 RepID=A0A2H5U451_RHIID
AS_DN15210_c0_g1	OBZ83181 cds supercontig:ASM168372v1:scaffold_706:6462:8505:-1 gene:A0J61_08767 gene_biotype:protein_coding transcript_biotype:protein_coding gene_symbol:grp78 description:glucose-regulated	7e-55	76.9444	0	0	2.35372	Basidiomycota	NA	UniRef90_K7ITP6 Uncharacterized protein n=1 Tax=Nasonia vitripennis TaxID=7425 RepID=K7ITP6_NASVI
AS_DN93916_c0_g1	OAQ23945 cds supercontig:Mortierella_elongata_AG-77_v2.0:KV442105:116533:118927:1 gene:K457DRAFT_82680 gene_biotype:protein_coding transcript_biotype:protein_coding description:HS60_AJECA heat shock protein 60, mitochondrial precursor (antigen HIS-62)	5e-56	80.1347	0	0	0.769024	Ascomycota	Heat shock protein 60 (Fragment)	UniRef90_B8MK05 Antigenic mitochondrial protein HSP60, putative n=3 Tax=Eurotiales TaxID=5042 RepID=B8MK05_TALSN
AS_DN51359_c2_g1	ORZ03839 cds supercontig:Synrac1:BCR43scaffold_1:4338565:4340841:1 gene:BCR43DRAFT_529193 gene_biotype:protein_coding transcript_biotype:protein_coding description:70 kDa heat shock protein 3	0	81.4346	37.0815	61.562	71.3344	Ascomycota	Heat shock 70 kDa protein (Fragment)	UniRef90_A0A139I2Z2 Uncharacterized protein n=2 Tax=leotiomyceta TaxID=716546 RepID=A0A139I2Z2_9PEZI
AS_DN32582_c1_g1	ORY97351 cds supercontig:Synrac1:BCR43scaffold_4:590591:591258:-1 gene:BCR43DRAFT_489639 gene_biotype:protein_coding transcript_biotype:protein_coding description:40S ribosomal protein S22-A	2e-90	80.791	0.129561	0.0629075	2.15331	Ascomycota	Structural constituent of ribosome	UniRef90_C5P887 40S ribosomal protein S22, putative n=172 Tax=Eukaryota TaxID=2759 RepID=C5P887_COCP7
AS_DN35060_c0_g1	OAQ27651 cds supercontig:Mortierella_elongata_AG-77_v2.0:KV442055:184207:185809:-1 gene:K457DRAFT_127300 gene_biotype:protein_coding transcript_biotype:protein_coding description:citrate synthase	1e-83	74.4015	0.0241774	0	3.05891	Basidiomycota	Citrate synthase	UniRef90_A8P4K9 Citrate synthase n=1 Tax=Coprinopsis cinerea (strain Okayama-7 / 130 / ATCC MYA-4618 / FGSC 9003) TaxID=240176 RepID=A8P4K9_COPC7
AS_DN93177_c0_g1	ORY90377 cds supercontig:Synrac1:BCR43scaffold_12:152111:153665:-1 gene:BCR43DRAFT_480338 gene_biotype:protein_coding transcript_biotype:protein_coding description:enolase	7e-159	73.8523	0	0	1.79608	Basidiomycota	Phosphopyruvate hydratase	UniRef90_A0A166ATG3 Enolase n=3 Tax=Agaricomycetes incertae sedis TaxID=355688 RepID=A0A166ATG3_9HOMO
AS_DN136774_c0_g1	PKK67506 cds supercontig:ASM159315v1:scaffold952_size29400:3783:4457:-1 gene:RhiirC2_783416 gene_biotype:protein_coding transcript_biotype:protein_coding description:hypothetical protein	3e-68	74.6032	0	0	2.05878	Other fungi	NA	UniRef90_U9UBQ5 Plant late embryo abundant (Lea) related n=5 Tax=Rhizophagus irregularis TaxID=588596 RepID=U9UBQ5_RHIID
AS_DN40658_c0_g1	CDH50668 cds supercontig:454Minimus:SCAF00007:605350:606429:-1 gene:LCOR_02374.1 gene_biotype:protein_coding transcript_biotype:protein_coding gene_symbol:LCOR_02374.1 description:gtp-binding nuclear protein gsp1 ran	6e-153	78.7597	0	0	3.84381	Ascomycota	GTP-binding nuclear protein GSP1/Ran	UniRef90_A0A0F4GRP3 GTP-binding nuclear protein n=6 Tax=Zymoseptoria TaxID=1047167 RepID=A0A0F4GRP3_9PEZI
AS_DN140444_c0_g1	ORZ16641 cds supercontig:Lobtra1:BCR41scaffold_17:73645:75253:1 gene:BCR41DRAFT_352876 gene_biotype:protein_coding transcript_biotype:protein_coding description:P-loop containing nucleoside triphosphate hydrolase protein	2e-56	77.458	0.0203487	0	1.76246	Basidiomycota	Probable GSP1-GTP-binding protein of the ras superfamily	UniRef90_A0A1C7MG98 GTP-binding nuclear protein n=29 Tax=Basidiomycota TaxID=5204 RepID=A0A1C7MG98_GRIFR
AS_DN89434_c0_g1	CDH60603 cds supercontig:454Minimus:SCAF00100:13495:16143:1 gene:LCOR_11385.1 gene_biotype:protein_coding transcript_biotype:protein_coding gene_symbol:LCOR_11385.1 description:ribosomal protein l19	4e-42	75.5352	0	0.072089	4.93195	Ascomycota	NA	UniRef90_A0A0H1BFN2 Uncharacterized protein n=1 Tax=Emmonsia parva UAMH 139 TaxID=1246674 RepID=A0A0H1BFN2_9EURO
AS_DN8486_c0_g1	OAQ36335 cds supercontig:Mortierella_elongata_AG-77_v2.0:KV442012:1089201:1091270:-1 gene:K457DRAFT_147549 gene_biotype:protein_coding transcript_biotype:protein_coding description:glyceraldehyde 3-phosphate dehydrogenase	2e-117	72.7395	0	0	3.53441	Ascomycota	Glyceraldehyde 3-phosphate dehydrogenase (Fragment)	UniRef90_A0A1L8E9Y9 Putative secreted protein n=1 Tax=Haematobia irritans TaxID=7368 RepID=A0A1L8E9Y9_HAEIR
AS_DN59592_c8_g2	OAQ34541 cds supercontig:Mortierella_elongata_AG-77_v2.0:KV442017:565902:568930:-1 gene:K457DRAFT_28438 gene_biotype:protein_coding transcript_biotype:protein_coding description:hsp71-like protein	3e-94	81.0155	0.132911	0	99.4984	Ascomycota	Heat shock protein 70 (Fragment)	UniRef90_V5FHU7 Molecular chaperone Hsp70 n=2 Tax=Eurotiales TaxID=5042 RepID=V5FHU7_BYSSN
AS_DN13770_c0_g1	OAD07759 cds supercontig:Mucci2:MUCCIscaffold_01:1398421:1399781:-1 gene:MUCCIDRAFT_154753 gene_biotype:protein_coding transcript_biotype:protein_coding description:hypothetical protein	1e-53	73.3333	0	0	4.8127	Other fungi	NA	UniRef90_A5DQZ8 ADP,ATP carrier protein n=2 Tax=Meyerozyma guilliermondii (strain ATCC 6260 / CBS 566 / DSM 6381 / JCM 1539/ NBRC 10279 / NRRL Y-324) TaxID=294746 RepID=A5DQZ8_PICGU
AS_DN46685_c0_g1	OAQ30519 cds supercontig:Mortierella_elongata_AG-77_v2.0:KV442034:31821:33203:-1 gene:K457DRAFT_31359 gene_biotype:protein_coding transcript_biotype:protein_coding description:translation elongation factor	9e-120	81.1594	0.0788489	0.156447	26.8887	Ascomycota	Translation elongation factor 1-alpha (Fragment)	UniRef90_D5JGM2 Translation elongation factor 1-alpha (Fragment) n=39 Tax=leotiomyceta TaxID=716546 RepID=D5JGM2_9PLEO
AS_DN108979_c0_g1	CEJ00711 cds supercontig:Rmicro_CBS_344.29_Allpaths-LG:SCAF607:1576:4808:1 gene:RMCBS344292_14760 gene_biotype:protein_coding transcript_biotype:protein_coding gene_symbol:RMCBS344292_14760 description:Putative Ssa4p	1e-54	74.9064	0	0	4.27724	Ascomycota	NA	UniRef90_B8MHL8 Hsp70 chaperone (HscA), putative n=2 Tax=Eurotiomycetidae TaxID=451871 RepID=B8MHL8_TALSN
AS_DN69466_c0_g1	GBC34512 cds supercontig:Rir_HGAP_ii_V2:unitig_371.:103894:105832:-1 gene:RIR_1925400 gene_biotype:protein_coding transcript_biotype:protein_coding description:hhe domain cation binding protein	4e-111	90	0	0	0.952027	Other fungi	NA	UniRef90_A0A2H5SW32 Hhe domain cation binding protein n=5 Tax=Rhizophagus irregularis TaxID=588596 RepID=A0A2H5SW32_RHIID
AS_DN56192_c2_g1	ORZ02221 cds supercontig:Synrac1:BCR43scaffold_1:250136:251859:-1 gene:BCR43DRAFT_481207 gene_biotype:protein_coding transcript_biotype:protein_coding description:ATP-dependent RNA helicase FAL1	2e-39	76.3754	0	0	7.21111	Ascomycota	NA	UniRef90_A0A177DP42 p-loop containing nucleoside triphosphate hydrolase protein n=8 Tax=leotiomyceta TaxID=716546 RepID=A0A177DP42_ALTAL
AS_DN35449_c0_g1	OZJ06083 cds supercontig:ASM226119v1:scaffold_7:211676:213236:1 gene:BZG36_01116 gene_biotype:protein_coding transcript_biotype:protein_coding description:Citrate synthase, mitochondrial	8e-60	72.7735	0	0	3.45795	Ascomycota	Citrate synthase	UniRef90_A0A0U1LTK4 Citrate synthase n=21 Tax=Eurotiomycetidae TaxID=451871 RepID=A0A0U1LTK4_TALIS
AS_DN90342_c0_g1	EXX64186 cds supercontig:Rir:jcf7180003189220:5072:5794:1 gene:RirG_145160 gene_biotype:protein_coding transcript_biotype:protein_coding description:hypothetical protein	3e-123	84.153	0	0	1.46562	Other fungi	NA	UniRef90_U9TIS6 Uncharacterized protein n=2 Tax=Rhizophagus irregularis TaxID=588596 RepID=U9TIS6_RHIID
AS_DN93887_c0_g1	PKC13447 cds supercontig:ASM159320v1:scaffold191_size104940:92385:94436:-1 gene:RhiirA5_496147 gene_biotype:protein_coding transcript_biotype:protein_coding description:hypothetical protein	4e-77	71.1111	0	0	1.96292	Other fungi	NA	UniRef90_U9TUC7 Uncharacterized protein n=5 Tax=Rhizophagus irregularis TaxID=588596 RepID=U9TUC7_RHIID
AS_DN13420_c0_g1	KFH61895 cds supercontig:Mort_vert_NRRL_6337_V1:KN042435:27803:30438:1 gene:MVEG_12229 gene_biotype:protein_coding transcript_biotype:protein_coding description:ATP synthase subunit beta, mitochondrial	3e-136	73.617	0	0	3.24891	Basidiomycota	ATP synthase beta subunit	UniRef90_A0A165EP22 ATP synthase subunit beta n=1 Tax=Exidia glandulosa HHB12029 TaxID=1314781 RepID=A0A165EP22_EXIGL
AS_DN41544_c0_g1	SAM05832 cds supercontig:AG_v1:scf_12318:70869:73361:-1 gene:SAM05832 gene_biotype:protein_coding transcript_biotype:protein_coding gene_symbol:ABSGL_11707.1 scaffold 12318 description:hypothetical protein	8e-51	73.7673	0	0	2.78002	Basidiomycota	NA	UniRef90_A0A2N6N8P5 Uncharacterized protein n=1 Tax=Beauveria bassiana TaxID=176275 RepID=A0A2N6N8P5_BEABA
AS_DN56192_c3_g1	CDH60047 cds supercontig:454Minimus:SCAF00083:58053:59648:-1 gene:LCOR_10845.1 gene_biotype:protein_coding transcript_biotype:protein_coding gene_symbol:LCOR_10845.1 description:dead-domain-containing protein	1e-160	72.8571	0.00443083	0.0140934	21.973	Ascomycota	p-loop containing nucleoside triphosphate hydrolase	UniRef90_A0A178BNS3 Uncharacterized protein n=1 Tax=Fonsecaea multimorphosa TaxID=979981 RepID=A0A178BNS3_9EURO
AS_DN23547_c0_g1	GBB95014 cds supercontig:RclarusHR1_1.0:BEXD01001624:79227:81656:1 gene:RclHR1_02460034 gene_biotype:protein_coding transcript_biotype:protein_coding description:hypothetical protein	1e-141	98.9362	0	0.0824125	4.73943	Other fungi	Putative Polyadenylate-binding protein, cytoplasmic and nuclear	UniRef90_A0A1D1Z6T7 Polyadenylate-binding protein n=9 Tax=Eukaryota TaxID=2759 RepID=A0A1D1Z6T7_9ARAE
AS_DN111716_c0_g1	OZJ02177 cds supercontig:ASM226119v1:scaffold_179:22879:25493:1 gene:BZG36_04327 gene_biotype:protein_coding transcript_biotype:protein_coding description:Aconitate hydratase, mitochondrial	1e-67	73.913	0	0	1.84164	Basidiomycota	NA	UniRef90_W4K319 Aconitate hydratase, mitochondrial n=1 Tax=Heterobasidion irregulare TC 32-1 TaxID=747525 RepID=W4K319_9HOMO
AS_DN76351_c0_g1	GBB86114 cds supercontig:RclarusHR1_1.0:BEXD01000289:6939:7417:1 gene:RclHR1_12580002 gene_biotype:protein_coding transcript_biotype:protein_coding description:hypothetical protein	1e-32	70.2778	0.0746217	0	6.41273	Other fungi	NA	UniRef90_U9TIS6 Uncharacterized protein n=2 Tax=Rhizophagus irregularis TaxID=588596 RepID=U9TIS6_RHIID
AS_DN129592_c0_g1	OAQ27844 cds supercontig:Mortierella_elongata_AG-77_v2.0:KV442053:96889:100875:1 gene:K457DRAFT_139254 gene_biotype:protein_coding transcript_biotype:protein_coding description:putative casein kinase-1 hhp1	3e-84	78.7402	0	0	3.8393	Ascomycota	NA	UniRef90_L2FP40 Casein kinase i n=3 Tax=Pezizomycotina TaxID=147538 RepID=L2FP40_COLGN
AS_DN114198_c1_g1	OAQ24311 cds supercontig:Mortierella_elongata_AG-77_v2.0:KV442097:143142:146548:1 gene:K457DRAFT_100782 gene_biotype:protein_coding transcript_biotype:protein_coding description:transitional endoplasmic reticulum ATPase	2e-111	82.265	0	0	2.32506	Ascomycota	NA	UniRef90_A0A0G4MS50 Uncharacterized protein (Fragment) n=1 Tax=Verticillium longisporum TaxID=100787 RepID=A0A0G4MS50_9PEZI
AS_DN21993_c0_g1	GBB98558 cds supercontig:RclarusHR1_1.0:BEXD01002513:71332:71843:-1 gene:RclHR1_03260016 gene_biotype:protein_coding transcript_biotype:protein_coding description:hypothetical protein	5e-102	70.045	0	0.087214	3.29574	Other fungi	Mismatch base pair and cruciform DNA recognition protein hmp1	UniRef90_U9TCH2 Mismatch base pair and cruciform DNA recognition protein hmp1 n=5 Tax=Rhizophagus irregularis TaxID=588596 RepID=U9TCH2_RHIID
AS_DN3057_c0_g1	OAQ28255 cds supercontig:Mortierella_elongata_AG-77_v2.0:KV442050:327607:331214:-1 gene:K457DRAFT_138921 gene_biotype:protein_coding transcript_biotype:protein_coding description:cell division/GTP binding protein	9e-118	71.174	0	0	2.95738	Basidiomycota	Cell division control protein 10	UniRef90_A0A165F3D6 Cell division/GTP binding protein n=1 Tax=Exidia glandulosa HHB12029 TaxID=1314781 RepID=A0A165F3D6_EXIGL
AS_DN92365_c0_g1	ORE21797 cds supercontig:Rhimi_ATCC11559_1:KV921274:135955:138190:1 gene:BCV71DRAFT_253385 gene_biotype:protein_coding transcript_biotype:protein_coding description:hsp7-like protein	4e-80	71.4876	0	0	1.81721	Basidiomycota	NA	UniRef90_A8N722 Heat shock protein n=1 Tax=Coprinopsis cinerea (strain Okayama-7 / 130 / ATCC MYA-4618 / FGSC 9003) TaxID=240176 RepID=A8N722_COPC7
AS_DN134355_c0_g1	ORY91345 cds supercontig:Synrac1:BCR43scaffold_11:1074842:1075676:-1 gene:BCR43DRAFT_480160 gene_biotype:protein_coding transcript_biotype:protein_coding description:40S ribosomal protein S5	1e-51	78.4314	0	0	1.80439	Basidiomycota	Small subunit ribosomal protein S5e	UniRef90_F2D555 Predicted protein n=1 Tax=Hordeum vulgare subsp. vulgare TaxID=112509 RepID=F2D555_HORVV
AS_DN81074_c0_g1	EPB87752 cds supercontig:Muco_sp_1006Ph_V1:KE123962:48167:49588:1 gene:HMPREF1544_05412 gene_biotype:protein_coding transcript_biotype:protein_coding description:60S ribosomal protein L3-A	4e-29	71.8121	0	0.145005	3.19391	Ascomycota	NA	UniRef90_B8MIZ6 60S ribosomal protein L3 n=4 Tax=Eurotiales TaxID=5042 RepID=B8MIZ6_TALSN
AS_DN40979_c0_g1	ORZ01403 cds supercontig:Synrac1:BCR43scaffold_2:3579121:3580260:1 gene:BCR43DRAFT_453909 gene_biotype:protein_coding transcript_biotype:protein_coding description:glyceraldehyde-3-phosphate dehydrogenase	3e-177	75.5208	0	0	3.88003	Basidiomycota	Glyceraldehyde-3-phosphate dehydrogenase	UniRef90_A8NJ68 Glyceraldehyde-3-phosphate dehydrogenase n=1 Tax=Coprinopsis cinerea (strain Okayama-7 / 130 / ATCC MYA-4618/ FGSC 9003) TaxID=240176 RepID=A8NJ68_COPC7
AS_DN12140_c0_g1	EIE82505 cds supercontig:RO3:supercont3.5:1215774:1217971:-1 gene:RO3G_07210 gene_biotype:protein_coding transcript_biotype:protein_coding description:hsp7-like protein	1e-95	76.5092	0	0	3.49699	Ascomycota	Heat shock protein 70kDa (Fragment)	UniRef90_B8MC54 Mitochondrial Hsp70 chaperone (Ssc70), putative n=11 Tax=Eurotiales TaxID=5042 RepID=B8MC54_TALSN

## Sheet: Hybrid 11648
ID	Blast hit	E-value	Alignment coverage	Leaf mean expression (TPM)	Stem mean expression (TPM)	Root mean expression (TPM)	Classification	Pannzer Annotation	Blast Uniref90 annotation
HY_DN83064_c0_g1	OZJ04318 cds supercontig:ASM226119v1:scaffold_45:4285:6076:-1 gene:BZG36_03155 gene_biotype:protein_coding transcript_biotype:protein_coding description:ATP synthase subunit alpha,mitochondrial	3e-151	78.8889	0	0	2.50443	Basidiomycota	ATP synthase alpha chain liver isoform, mitochondrial	UniRef90_A0A1Q3EFH4 ATP synthase F1 alpha subunit n=1 Tax=Lentinula edodes TaxID=5353 RepID=A0A1Q3EFH4_LENED
HY_DN32890_c0_g1	ORY91890 cds supercontig:Synrac1:BCR43scaffold_10:281238:282840:1 gene:BCR43DRAFT_478943 gene_biotype:protein_coding transcript_biotype:protein_coding description:ATP-dependent RNA helicase eIF4A	0	75.8186	0	0	10.5379	Ascomycota	Eukaryotic translation initiation factor 4	UniRef90_W9XLK2 ATP-dependent RNA helicase eIF4A n=1 Tax=Capronia epimyces CBS 606.96 TaxID=1182542 RepID=W9XLK2_9EURO
HY_DN31792_c0_g1	ORE05255 cds supercontig:Rhimi_ATCC52814_1:KV921949:32757:33903:-1 gene:BCV72DRAFT_142191 gene_biotype:protein_coding transcript_biotype:protein_coding description:glyceraldehyde-3-phosphate dehydrogenase 2	2e-89	85.2507	0	0	4.14473	Basidiomycota	Glyceraldehyde 3-phosphate dehydrogenase (Fragment)	UniRef90_I1V2R6 Glyceraldehyde-3-phosphate dehydrogenase (Fragment) n=10 Tax=Tricholoma TaxID=40144 RepID=I1V2R6_9AGAR
HY_DN54320_c0_g1	GBB86114 cds supercontig:RclarusHR1_1.0:BEXD01000289:6939:7417:1 gene:RclHR1_12580002 gene_biotype:protein_coding transcript_biotype:protein_coding description:hypothetical protein	7e-75	76.6382	0	0	6.19598	Other fungi	NA	UniRef90_U9TIS6 Uncharacterized protein n=2 Tax=Rhizophagus irregularis TaxID=588596 RepID=U9TIS6_RHIID
HY_DN19574_c0_g1	OAQ26144 cds supercontig:Mortierella_elongata_AG-77_v2.0:KV442070:155435:157856:1 gene:K457DRAFT_22547 gene_biotype:protein_coding transcript_biotype:protein_coding description:hsp70-like protein	9e-64	77.8788	0	0	13.2068	Ascomycota	NA	UniRef90_Q6QZR2 70 kDa heat shock protein (Fragment) n=1 Tax=Arthroderma otae TaxID=63405 RepID=Q6QZR2_ARTOT
HY_DN52962_c0_g1	OAQ32475 cds supercontig:Mortierella_elongata_AG-77_v2.0:KV442025:699819:700298:-1 gene:K457DRAFT_70613 gene_biotype:protein_coding transcript_biotype:protein_coding description:S-phase kinase-associated protein 1A-like protein	6e-62	74	0	0.0210117	2.17769	Ascomycota	Sulfur metabolite repression control protein C	UniRef90_B6QGB9 E3 ubiquitin ligase complex SCF subunit sconC n=2 Tax=Talaromyces marneffei TaxID=37727 RepID=SKP1_TALMQ
HY_DN93144_c0_g1	CDS07402 cds supercontig:Lramosa_hybrid_454_Illumina:LK023324.1:432241:434427:1 gene:LRAMOSA01351 gene_biotype:protein_coding transcript_biotype:protein_coding gene_symbol:LRAMOSA01351 description:Putative Glucose-regulated protein	4e-38	73.9837	0	0	2.05375	Ascomycota	Putative GTP-binding protein (Fragment)	UniRef90_A0A177BZM0 Heat shock protein 70b n=2 Tax=Paraphaeosphaeria TaxID=125369 RepID=A0A177BZM0_9PLEO
HY_DN10827_c0_g1	OAQ34541 cds supercontig:Mortierella_elongata_AG-77_v2.0:KV442017:565902:568930:-1 gene:K457DRAFT_28438 gene_biotype:protein_coding transcript_biotype:protein_coding description:hsp71-like protein	7e-80	79.2023	0	0	21.6277	Ascomycota	Heat shock protein 70 (Fragment)	UniRef90_A0A0J6YS34 Heat shock 70 kDa protein n=1 Tax=Coccidioides immitis RMSCC 2394 TaxID=404692 RepID=A0A0J6YS34_COCIT
HY_DN39331_c2_g1	OAQ34541 cds supercontig:Mortierella_elongata_AG-77_v2.0:KV442017:565902:568930:-1 gene:K457DRAFT_28438 gene_biotype:protein_coding transcript_biotype:protein_coding description:hsp71-like protein	5e-91	84.2105	222.736	83.5114	413.131	Ascomycota	NA	UniRef90_A0A0L1ISR5 Heat shock protein n=1 Tax=Aspergillus nomius NRRL 13137 TaxID=1509407 RepID=A0A0L1ISR5_ASPNO
HY_DN39331_c3_g1	OZJ06343 cds supercontig:ASM226119v1:scaffold_4:263775:265783:-1 gene:BZG36_00716 gene_biotype:protein_coding transcript_biotype:protein_coding description:Heat shock protein HSS1	2e-76	79.7531	0.064832	0	19.6622	Ascomycota	Heat shock 70 kd protein cognate 1	UniRef90_A5HVI6 Heat shock protein 70 (Fragment) n=1 Tax=Paracoccidioides brasiliensis TaxID=121759 RepID=A5HVI6_PARBR
HY_DN31293_c0_g1	OAQ33404 cds supercontig:Mortierella_elongata_AG-77_v2.0:KV442021:519510:522517:1 gene:K457DRAFT_89800 gene_biotype:protein_coding transcript_biotype:protein_coding description:heat shock protein 90	3e-101	78.1609	0	0	2.55288	Ascomycota	Heat shock protein 90	UniRef90_F0XMF4 Heat shock protein 90 n=5 Tax=Ophiostomataceae TaxID=5152 RepID=F0XMF4_GROCL
HY_DN11380_c0_g1	ORY96451 cds supercontig:Synrac1:BCR43scaffold_5:876029:877288:-1 gene:BCR43DRAFT_474203 gene_biotype:protein_coding transcript_biotype:protein_coding description:mitochondrial carrier domain-containing protein	4e-55	70.9402	0	0.0122451	3.72575	Ascomycota	Mitochondrial phosphate carrier	UniRef90_A0A194XN84 Mitochondrial carrier n=7 Tax=Leotiomycetes TaxID=147548 RepID=A0A194XN84_9HELO
HY_DN68989_c0_g1	EXX61076 cds supercontig:Rir:jcf7180003191410:37711:38633:1 gene:RirG_174250 gene_biotype:protein_coding transcript_biotype:protein_coding description:hypothetical protein	1e-66	86.1635	0	0	3.53162	Other fungi	NA	UniRef90_A0A1D1YRF5 Heat shock protein n=1 Tax=Anthurium amnicola TaxID=1678845 RepID=A0A1D1YRF5_9ARAE
HY_DN94514_c0_g1	OAQ34518 cds supercontig:Mortierella_elongata_AG-77_v2.0:KV442017:498247:500664:1 gene:K457DRAFT_133542 gene_biotype:protein_coding transcript_biotype:protein_coding description:heat shock protein Hsp70-9	6e-77	77.9249	0	0	3.75638	Ascomycota	NA	UniRef90_A0A0U1M777 Heat shock 70 kDa protein n=2 Tax=Eurotiales TaxID=5042 RepID=A0A0U1M777_TALIS
HY_DN65490_c0_g1	OBZ86601 cds supercontig:ASM168372v1:scaffold_285:14939:15605:1 gene:A0J61_05347 gene_biotype:protein_coding transcript_biotype:protein_coding gene_symbol:rps-5_2 description:40S ribosomal protein S5	2e-41	72.6776	0	0	3.29387	Ascomycota	40S ribosomal protein S5-B	UniRef90_C9SLB3 40S ribosomal protein S5-B n=4 Tax=Hypocreomycetidae TaxID=222543 RepID=C9SLB3_VERA1
HY_DN594_c0_g1	OAC97815 cds supercontig:Mucci2:MUCCIscaffold_12:141829:143410:-1 gene:MUCCIDRAFT_157509 gene_biotype:protein_coding transcript_biotype:protein_coding description:hypothetical protein	3e-93	84.5238	0	0	3.22298	Ascomycota	NA	UniRef90_A0A2I1C2N4 P-loop containing nucleoside triphosphate hydrolase protein n=2 Tax=Eurotiomycetidae TaxID=451871 RepID=A0A2I1C2N4_9EURO
HY_DN36716_c3_g1	ORZ03839 cds supercontig:Synrac1:BCR43scaffold_1:4338565:4340841:1 gene:BCR43DRAFT_529193 gene_biotype:protein_coding transcript_biotype:protein_coding description:70 kDa heat shock protein 3	4e-143	86.1635	0	0	32.6951	Ascomycota	Heat shock protein 70 (Fragment)	UniRef90_A0A0G2EXE1 Putative hsp70-like protein n=1 Tax=Diplodia seriata TaxID=420778 RepID=A0A0G2EXE1_9PEZI
HY_DN68001_c0_g1	OAQ34032 cds supercontig:Mortierella_elongata_AG-77_v2.0:KV442019:693045:695690:1 gene:K457DRAFT_134350 gene_biotype:protein_coding transcript_biotype:protein_coding description:DnaK-type molecular chaperone bipA	4e-83	79.562	0.039728	0	1.75439	Ascomycota	NA	UniRef90_A0A0J8RFI9 Heat shock 70 kDa protein C n=1 Tax=Coccidioides immitis H538.4 TaxID=396776 RepID=A0A0J8RFI9_COCIT
HY_DN41793_c0_g1	PKB99247 cds supercontig:ASM159320v1:scaffold2270_size37928:5535:6535:1 gene:RhiirA5_366531 gene_biotype:protein_coding transcript_biotype:protein_coding description:hypothetical protein	1e-111	90.2913	0	0	2.20986	Other fungi	NA	UniRef90_A0A2H5SW32 Hhe domain cation binding protein n=5 Tax=Rhizophagus irregularis TaxID=588596 RepID=A0A2H5SW32_RHIID
HY_DN42815_c0_g1	SAL95146 cds supercontig:AG_v1:scf_568:3:1907:-1 gene:SAL95146 gene_biotype:protein_coding transcript_biotype:protein_coding gene_symbol:ABSGL_00450.1 scaffold 568 description:hypothetical protein, partial	9e-50	75.2998	0	0	2.1128	Basidiomycota	NA	UniRef90_A0A0D2NCA7 Uncharacterized protein n=1 Tax=Hypholoma sublateritium FD-334 SS-4 TaxID=945553 RepID=A0A0D2NCA7_9AGAR
HY_DN38819_c4_g2	ORY94643 cds supercontig:Synrac1:BCR43scaffold_7:747809:749314:-1 gene:BCR43DRAFT_525818 gene_biotype:protein_coding transcript_biotype:protein_coding description:elongation factor 1-alpha	1e-132	84.5992	19.2943	70.6662	106.138	Ascomycota	Translation elongation factor 1 alpha subunit (Fragment)	UniRef90_A0A023VWL2 Translation elongation factor 1 alpha subunit (Fragment) n=2 Tax=leotiomyceta TaxID=716546 RepID=A0A023VWL2_9EURO
HY_DN47779_c0_g1	ORZ01403 cds supercontig:Synrac1:BCR43scaffold_2:3579121:3580260:1 gene:BCR43DRAFT_453909 gene_biotype:protein_coding transcript_biotype:protein_coding description:glyceraldehyde-3-phosphate dehydrogenase	2e-39	74.0741	0	0	3.73301	Ascomycota	Glyceraldehyde-3-phosphate dehydrogenase, type I (Fragment)	UniRef90_A0A1Y1LGR5 Uncharacterized protein (Fragment) n=1 Tax=Photinus pyralis TaxID=7054 RepID=A0A1Y1LGR5_PHOPY
HY_DN107727_c0_g1	OZJ04187 cds supercontig:ASM226119v1:scaffold_50:83551:86160:1 gene:BZG36_02190 gene_biotype:protein_coding transcript_biotype:protein_coding description:Elongation factor 2	2e-106	86.1333	0	0	2.97356	Ascomycota	NA	UniRef90_R7Z4X0 Elongation factor 2 n=1 Tax=Coniosporium apollinis (strain CBS 100218) TaxID=1168221 RepID=R7Z4X0_CONA1
HY_DN30417_c0_g1	ORX54060 cds supercontig:Hesve2:DM01scaffold_14:334272:335717:-1 gene:DM01DRAFT_1322229 gene_biotype:protein_coding transcript_biotype:protein_coding description:translation elongation factor 1-alpha	7e-100	83.0601	0.0486067	0.05785	34.5414	Basidiomycota	Translation elongation factor 1-alpha (Fragment)	UniRef90_Q7Z8H4 Elongation factor 1-alpha (Fragment) n=39 Tax=Agaricomycetes TaxID=155619 RepID=Q7Z8H4_9AGAR
HY_DN20442_c0_g1	CDH54915 cds supercontig:454Minimus:SCAF00026:163675:164959:-1 gene:LCOR_06124.1 gene_biotype:protein_coding transcript_biotype:protein_coding gene_symbol:LCOR_06124.1 description:14-3-3 protein	7e-58	71.1016	0	0	2.09034	Basidiomycota	Tyrosine 3-monooxygenase/tryptophan 5-monooxygenase activation protein epsilon	UniRef90_A1YW93 14-3-3-like protein n=1 Tax=Physarum polycephalum TaxID=5791 RepID=A1YW93_PHYPO
HY_DN65961_c0_g1	OZJ04920 cds supercontig:ASM226119v1:scaffold_26:11758:13614:1 gene:BZG36_02635 gene_biotype:protein_coding transcript_biotype:protein_coding description:hypothetical protein	4e-34	70.5376	0	0	1.13843	Ascomycota	NA	UniRef90_R7YY73 ABC transporter ATP-binding protein ARB1 n=2 Tax=Dothideomycetes TaxID=147541 RepID=R7YY73_CONA1
HY_DN17583_c0_g1	CDS08320 cds supercontig:Lramosa_hybrid_454_Illumina:LK023324.1:2698144:2701426:1 gene:LRAMOSA02268 gene_biotype:protein_coding transcript_biotype:protein_coding gene_symbol:LRAMOSA02268 description:Putative Glutamine-fructose-6-phosphateFT transaminase (Isomerizing)	2e-63	73.0994	0	0	4.7631	Basidiomycota	Putative Glucosamine-fructose-6-phosphate aminotransferase	UniRef90_V2XBQ5 Glucosamine-fructose-6-phosphate aminotransferase n=2 Tax=Moniliophthora roreri TaxID=221103 RepID=V2XBQ5_MONRO
HY_DN41073_c0_g1	OAQ34104 cds supercontig:Mortierella_elongata_AG-77_v2.0:KV442018:88977:90478:1 gene:K457DRAFT_147908 gene_biotype:protein_coding transcript_biotype:protein_coding description:60S ribosomal protein L7	7e-101	76.4172	0.223853	0.0858253	3.70922	Ascomycota	NA	UniRef90_A0A0L0NF04 Uncharacterized protein n=1 Tax=Tolypocladium ophioglossoides CBS 100239 TaxID=1163406 RepID=A0A0L0NF04_9HYPO
HY_DN24210_c0_g1	ORZ01392 cds supercontig:Synrac1:BCR43scaffold_2:3554461:3556699:1 gene:BCR43DRAFT_522244 gene_biotype:protein_coding transcript_biotype:protein_coding description:ATP synthase subunit beta	3e-108	86.0656	0.0763377	0	9.35266	Basidiomycota	ATP synthase subunit beta (Fragment)	UniRef90_M5BHW5 ATP synthase subunit beta n=8 Tax=Cantharellales TaxID=36064 RepID=M5BHW5_THACB
HY_DN87076_c0_g1	ORZ03520 cds supercontig:Synrac1:BCR43scaffold_1:3561856:3564387:-1 gene:BCR43DRAFT_450978 gene_biotype:protein_coding transcript_biotype:protein_coding description:heat shock protein 90-1	2e-25	77.1242	0	0	3.79694	Basidiomycota	NA	UniRef90_A0A0J9X2F1 Similar to Saccharomyces cerevisiae YMR186W HSC82 Cytoplasmic chaperone of the Hsp90 family n=1 Tax=Geotrichum candidum TaxID=1173061 RepID=A0A0J9X2F1_GEOCN
HY_DN14417_c0_g1	CDH50983 cds supercontig:454Minimus:SCAF00008:433547:435817:-1 gene:LCOR_02654.1 gene_biotype:protein_coding transcript_biotype:protein_coding gene_symbol:LCOR_02654.1 description:atp-dependent rna helicase ded1	5e-63	70.2703	0	0	3.30266	Ascomycota	NA	UniRef90_V5FFP9 ATP dependent RNA helicase (Dbp1), putative n=1 Tax=Byssochlamys spectabilis (strain No. 5 / NBRC 109023)TaxID=1356009 RepID=V5FFP9_BYSSN
HY_DN80303_c0_g1	ORY97351 cds supercontig:Synrac1:BCR43scaffold_4:590591:591258:-1 gene:BCR43DRAFT_489639 gene_biotype:protein_coding transcript_biotype:protein_coding description:40S ribosomal protein S22-A	4e-77	76.6382	0	0.242296	3.79961	Ascomycota	40S ribosomal protein S22	UniRef90_A0A1Y1KAH0 Uncharacterized protein (Fragment) n=2 Tax=Photinus pyralis TaxID=7054 RepID=A0A1Y1KAH0_PHOPY
HY_DN41287_c0_g1	ORE01121 cds supercontig:Rhimi_ATCC52814_1:KV922181:3649:4358:1 gene:BCV72DRAFT_310326 gene_biotype:protein_coding transcript_biotype:protein_coding description:60S ribosomal protein L1-B	3e-43	77.4603	0	0	5.67205	Ascomycota	Ribosomal protein (Fragment)	UniRef90_A0A167XWV0 60S ribosomal protein L1 n=1 Tax=Ascosphaera apis ARSEF 7405 TaxID=392613 RepID=A0A167XWV0_9EURO
HY_DN20428_c3_g1	ORY93363 cds supercontig:Synrac1:BCR43scaffold_9:969763:971514:-1 gene:BCR43DRAFT_496788 gene_biotype:protein_coding transcript_biotype:protein_coding description:tubulin alpha-1 chain	7e-133	77.8646	0	0	4.23818	Basidiomycota	Tubulin alpha chain	UniRef90_A0A0W0EZP2 Uncharacterized protein n=1 Tax=Moniliophthora roreri TaxID=221103 RepID=A0A0W0EZP2_9AGAR
HY_DN2435_c0_g1	ORE02147 cds supercontig:Rhimi_ATCC52814_1:KV922069:8547:9475:-1 gene:BCV72DRAFT_235156 gene_biotype:protein_coding transcript_biotype:protein_coding description:60S ribosomal protein L2	2e-65	78.3582	0	0	4.13189	Ascomycota	60S ribosomal protein L2	UniRef90_Q4WTW7 60S ribosomal protein L8, putative n=79 Tax=leotiomyceta TaxID=716546 RepID=Q4WTW7_ASPFU
HY_DN32985_c0_g1	ORE14969 cds supercontig:Rhimi_ATCC11559_1:KV921445:36981:38200:1 gene:BCV71DRAFT_41039 gene_biotype:protein_coding transcript_biotype:protein_coding description:ADP,ATP carrier protein	1e-79	70.1977	0.0926737	0.0481653	46.3742	Basidiomycota	Adenine nucleotide translocator	UniRef90_A0A165T2E3 Eukaryotic ADP/ATP carrier n=2 Tax=Agaricomycetes TaxID=155619 RepID=A0A165T2E3_9APHY
HY_DN33070_c1_g1	GAN08994 cds supercontig:ASM95059v1:DF836525.1:40180:42159:-1 gene:MAM1_0236d08515 gene_biotype:protein_coding transcript_biotype:protein_coding description:70 kDa heat shock protein 3	1e-114	77.3504	0	0	15.8899	Basidiomycota	Heat shock protein 70 kDa (Fragment)	UniRef90_K5WY18 Uncharacterized protein n=14 Tax=Agaricomycetes TaxID=155619 RepID=K5WY18_PHACS
HY_DN104507_c0_g1	KFH62238 cds supercontig:Mort_vert_NRRL_6337_V1:KN042433:694617:695349:-1 gene:MVEG_11876 gene_biotype:protein_coding transcript_biotype:protein_coding description:autophagy-like protein 8	9e-64	75.2137	0	0	3.57026	Ascomycota	Autophagy-related protein 8	UniRef90_A1CQS1 Autophagy-related protein 8 n=33 Tax=Eurotiomycetes TaxID=147545 RepID=ATG8_ASPCL
HY_DN50701_c0_g1	OAQ27844 cds supercontig:Mortierella_elongata_AG-77_v2.0:KV442053:96889:100875:1 gene:K457DRAFT_139254 gene_biotype:protein_coding transcript_biotype:protein_coding description:putative casein kinase-1 hhp1	3e-48	74.9235	0	0	4.55206	Basidiomycota	NA	UniRef90_A0A146I8X3 Ck1 ck1 ck1-d protein kinase n=1 Tax=Mycena chlorophos TaxID=658473 RepID=A0A146I8X3_9AGAR
HY_DN29769_c0_g1	OAQ28816 cds supercontig:Mortierella_elongata_AG-77_v2.0:KV442045:36808:39929:-1 gene:K457DRAFT_138338 gene_biotype:protein_coding transcript_biotype:protein_coding description:alpha-beta tubulin	0	78.4411	0.0264043	0.231153	4.34646	Basidiomycota	Tubulin beta chain	UniRef90_A0A2R6PVD1 Uncharacterized protein n=8 Tax=Agaricomycetes incertae sedis TaxID=355688 RepID=A0A2R6PVD1_9APHY
HY_DN27597_c0_g1	CDH51679 cds supercontig:454Minimus:SCAF00010:554866:557942:1 gene:LCOR_03252.1 gene_biotype:protein_coding transcript_biotype:protein_coding gene_symbol:LCOR_03252.1 description:aaa atpase	4e-127	70.1465	0	0	3.90407	Basidiomycota	Transitional endoplasmic reticulum ATPase 2	UniRef90_A0A0C3CKS5 Uncharacterized protein n=1 Tax=Hebeloma cylindrosporum h7 TaxID=686832 RepID=A0A0C3CKS5_HEBCY
HY_DN36716_c2_g1	CDH57025 cds supercontig:454Minimus:SCAF00043:7210:9609:1 gene:LCOR_08018.1 gene_biotype:protein_coding transcript_biotype:protein_coding gene_symbol:LCOR_08018.1 description:heat shock cognate 70	5e-91	83.3333	0.111122	0	37.8592	Ascomycota	NA	UniRef90_A5HVI6 Heat shock protein 70 (Fragment) n=1 Tax=Paracoccidioides brasiliensis TaxID=121759 RepID=A5HVI6_PARBR
HY_DN106081_c0_g1	OAQ34084 cds supercontig:Mortierella_elongata_AG-77_v2.0:KV442018:18562:20207:-1 gene:K457DRAFT_152268 gene_biotype:protein_coding transcript_biotype:protein_coding description:40S ribosomal protein S7	1e-42	72.6496	0	0	3.40703	Basidiomycota	NA	No hits
HY_DN83269_c0_g1	ORX47702 cds supercontig:Hesve2:DM01scaffold_32:67131:68414:-1 gene:DM01DRAFT_1338926 gene_biotype:protein_coding transcript_biotype:protein_coding description:TATA-box-binding protein	3e-69	71.7391	0	0	3.39494	Ascomycota	TATA box binding transcription initiation factor TFIID-1	UniRef90_A0A1Y2EI54 TATA-box binding protein n=1 Tax=Pseudomassariella vexata TaxID=1141098 RepID=A0A1Y2EI54_9PEZI
HY_DN16671_c0_g1	CEI87087 cds supercontig:Rmicro_CBS_344.29_Allpaths-LG:SCAF21:128454:129742:1 gene:RMCBS344292_01507 gene_biotype:protein_coding transcript_biotype:protein_coding gene_symbol:RMCBS344292_01507 description:Putative Ketol-acid reductoisomerase	1e-63	71.4026	0	0	2.64398	Basidiomycota	NA	UniRef90_E2LPW8 Uncharacterized protein (Fragment) n=1 Tax=Moniliophthora perniciosa (strain FA553 / isolate CP02) TaxID=554373 RepID=E2LPW8_MONPE
HY_DN108954_c0_g1	CDS03069 cds supercontig:Lramosa_hybrid_454_Illumina:LK023313.1:1265841:1266401:-1 gene:LRAMOSA00471 gene_biotype:protein_coding transcript_biotype:protein_coding gene_symbol:LRAMOSA00471 description:Putative Histone H4	6e-75	82.5083	0	0	8.10165	Ascomycota	NA	UniRef90_C5GDY6 Histone H4 n=3 Tax=leotiomyceta TaxID=716546 RepID=C5GDY6_AJEDR
HY_DN80867_c0_g1	ORY94829 cds supercontig:Synrac1:BCR43scaffold_7:1221197:1222614:1 gene:BCR43DRAFT_460644 gene_biotype:protein_coding transcript_biotype:protein_coding description:hypothetical protein	1e-79	75.0842	0	0	2.73443	Basidiomycota	Glutamine synthetase	UniRef90_Q96UV5 Glutamine synthetase n=20 Tax=Agaricomycetes TaxID=155619 RepID=GLNA_HEBCY
HY_DN69171_c0_g1	ORY96602 cds supercontig:Synrac1:BCR43scaffold_5:1251494:1252849:1 gene:BCR43DRAFT_491960 gene_biotype:protein_coding transcript_biotype:protein_coding description:60S acidic ribosomal protein P0	2e-93	73.1959	0	0	6.05126	Basidiomycota	Large subunit ribosomal protein LP0	UniRef90_K5W2Y3 60S acidic ribosomal protein P0 n=1 Tax=Phanerochaete carnosa (strain HHB-10118-sp) TaxID=650164 RepID=K5W2Y3_PHACS
HY_DN31792_c1_g1	CEI89441 cds supercontig:Rmicro_CBS_344.29_Allpaths-LG:SCAF67:97749:99008:-1 gene:RMCBS344292_03797 gene_biotype:protein_coding transcript_biotype:protein_coding gene_symbol:RMCBS344292_03797 description:Putative Glyceraldehyde-3-phosphate dehydrogenase 1	1e-95	76.4526	0	0	7.42967	Basidiomycota	Glyceraldehyde-3-phosphate dehydrogenase	UniRef90_A0A0W0FE11 Glyceraldehyde-3-phosphate dehydrogenase n=1 Tax=Moniliophthora roreri TaxID=221103 RepID=A0A0W0FE11_9AGAR
HY_DN5039_c0_g1	ORY91270 cds supercontig:Synrac1:BCR43scaffold_11:861429:863343:1 gene:BCR43DRAFT_464027 gene_biotype:protein_coding transcript_biotype:protein_coding description:ATP synthase subunit beta	2e-96	83.7209	0	0.0532293	4.41171	Basidiomycota	ATP synthase beta subuni (Fragment)	UniRef90_B0CSN1 ATP synthase subunit beta n=4 Tax=Agaricomycetidae TaxID=452333 RepID=B0CSN1_LACBS
HY_DN53258_c0_g1	OZJ05014 cds supercontig:ASM226119v1:scaffold_24:80679:81989:1 gene:BZG36_02129 gene_biotype:protein_coding transcript_biotype:protein_coding description:Glyceraldehyde-3-phosphate dehydrogenase	6e-95	70.3916	0	0	2.09363	Basidiomycota	Glyceraldehyde-3-phosphate dehydrogenase	UniRef90_G3M5I7 Glyceraldehyde-3-phosphate dehydrogenase n=36 Tax=Agaricomycotina TaxID=5302 RepID=G3M5I7_AURAJ
HY_DN27007_c0_g1	OAQ26424 cds supercontig:Mortierella_elongata_AG-77_v2.0:KV442067:149731:151384:-1 gene:K457DRAFT_140339 gene_biotype:protein_coding transcript_biotype:protein_coding description:mitochondrial carrier	2e-56	76.5432	0	0.07477	3.42115	Ascomycota	Putative Inorganic phosphate transporter	UniRef90_A0A1C1C739 Mitochondrial phosphate carrier protein n=4 Tax=Herpotrichiellaceae TaxID=43219 RepID=A0A1C1C739_9EURO
HY_DN14810_c0_g1	ORZ03839 cds supercontig:Synrac1:BCR43scaffold_1:4338565:4340841:1 gene:BCR43DRAFT_529193 gene_biotype:protein_coding transcript_biotype:protein_coding description:70 kDa heat shock protein 3	2e-61	78.2716	0	0.0494567	2.82413	Ascomycota	Heat shock protein 70 (Fragment)	UniRef90_A0A2A9P3N8 Uncharacterized protein n=1 Tax=Ophiocordyceps unilateralis TaxID=268505 RepID=A0A2A9P3N8_9HYPO
HY_DN65845_c0_g1	ORZ00262 cds supercontig:Synrac1:BCR43scaffold_2:802970:806264:1 gene:BCR43DRAFT_484915 gene_biotype:protein_coding transcript_biotype:protein_coding description:transitional endoplasmic reticulum ATPase	2e-101	81.7284	0	0	2.87307	Ascomycota	NA	UniRef90_A0A0U5CF34 Putative Cell division cycle protein 48 n=2 Tax=Aspergillus TaxID=5052 RepID=A0A0U5CF34_9EURO
HY_DN65299_c0_g1	PKK64679 cds supercontig:ASM159315v1:scaffold1398_size45496:35350:36369:-1 gene:RhiirC2_756342 gene_biotype:protein_coding transcript_biotype:protein_coding description:hypothetical protein	5e-68	77.6577	0	0	1.9886	Other fungi	Extracellular serine-rich protein	UniRef90_A0A2N1MSR9 Uncharacterized protein n=8 Tax=Rhizophagus irregularis TaxID=588596 RepID=A0A2N1MSR9_9GLOM
HY_DN38417_c0_g2	ORZ13794 cds supercontig:Lobtra1:BCR41scaffold_22:123395:124843:-1 gene:BCR41DRAFT_381170 gene_biotype:protein_coding transcript_biotype:protein_coding description:mitochondrial carrier domain-containing protein	2e-96	77.3176	0	0	16.1227	Ascomycota	NA	UniRef90_A0A0F7TGZ0 Putative ADP,ATP carrier protein n=12 Tax=Aspergillaceae TaxID=1131492 RepID=A0A0F7TGZ0_9EURO
HY_DN104573_c0_g1	CDS08010 cds supercontig:Lramosa_hybrid_454_Illumina:LK023324.1:1931776:1934610:1 gene:LRAMOSA01959 gene_biotype:protein_coding transcript_biotype:protein_coding gene_symbol:LRAMOSA01959 description:hypothetical protein	3e-48	79.6667	0	0	1.94531	Ascomycota	NA	UniRef90_A0A1L9VEP3 Uncharacterized protein n=1 Tax=Aspergillus glaucus CBS 516.65 TaxID=1160497 RepID=A0A1L9VEP3_ASPGL
HY_DN84139_c0_g1	PKY48272 cds supercontig:ASM159314v1:scaffold624_size41416:15752:16480:1 gene:RhiirA4_404246 gene_biotype:protein_coding transcript_biotype:protein_coding description:HSP20-like chaperone	6e-111	85.6	0	0	2.36429	Other fungi	Molecular chaperone	UniRef90_U9ULB2 HSP20-like chaperone n=5 Tax=Rhizophagus irregularis TaxID=588596 RepID=U9ULB2_RHIID
HY_DN44489_c0_g1	OAQ31090 cds supercontig:Mortierella_elongata_AG-77_v2.0:KV442031:202005:204021:1 gene:K457DRAFT_136372 gene_biotype:protein_coding transcript_biotype:protein_coding description:glyceraldehyde 3-phosphate dehydrogenase	2e-71	78.3582	0	0	4.90492	Ascomycota	Glyceraldehyde-3-phosphate dehydrogenase (Fragment)	UniRef90_W6JMG9 Glyceraldehyde-3-phosphate dehydrogenase n=8 Tax=Eurotiales TaxID=5042 RepID=W6JMG9_9EURO
HY_DN94653_c0_g1	ORY96799 cds supercontig:Synrac1:BCR43scaffold_5:1758183:1759739:-1 gene:BCR43DRAFT_458623 gene_biotype:protein_coding transcript_biotype:protein_coding description:GTP-binding protein rhoA	2e-69	77.5701	0	0	3.91054	Ascomycota	GTP-binding protein (Fragment)	UniRef90_A0A084QB76 Uncharacterized protein n=2 Tax=Stachybotrys TaxID=74721 RepID=A0A084QB76_STAC4
HY_DN55140_c0_g1	KFH62694 cds supercontig:Mort_vert_NRRL_6337_V1:KN042431:679923:682002:1 gene:MVEG_12086 gene_biotype:protein_coding transcript_biotype:protein_coding description:GTP-binding nuclear protein GSP1/Ran	2e-91	78.0952	0	0	2.28605	Ascomycota	GTP-binding nuclear protein (Fragment)	UniRef90_K1WSY9 GTP-binding nuclear protein n=1 Tax=Marssonina brunnea f. sp. multigermtubi (strain MB_m1) TaxID=1072389 RepID=K1WSY9_MARBU
